# Supplementary material
Source: MDPI journal article supplement (https://www.mdpi.com/1099-4300/20/11/860)

Case Processing Summary

| GENDER                |       | Cases |         |         |         |       |         |
|-----------------------|-------|-------|---------|---------|---------|-------|---------|
|                       |       | Valid |         | Missing |         | Total |         |
|                       |       | N     | Percent | N       | Percent | N     | Percent |
| RCMFE_PHASE1_SCALE_1_ | WOMEN | 42    | 100,0%  | 0       | 0,0%    | 42    | 100,0%  |
| SBP                   | MEN   | 23    | 100,0%  | 0       | 0,0%    | 23    | 100,0%  |
| RCMFE_PHASE1_SCALE_2_ | WOMEN | 42    | 100,0%  | 0       | 0,0%    | 42    | 100,0%  |
| SBP                   | MEN   | 23    | 100,0%  | 0       | 0,0%    | 23    | 100,0%  |
| RCMFE_PHASE1_SCALE_3_ | WOMEN | 42    | 100,0%  | 0       | 0,0%    | 42    | 100,0%  |
| SBP                   | MEN   | 23    | 100,0%  | 0       | 0,0%    | 23    | 100,0%  |
| RCMFE_PHASE1_SCALE_4_ | WOMEN | 42    | 100,0%  | 0       | 0,0%    | 42    | 100,0%  |
| SBP                   | MEN   | 23    | 100,0%  | 0       | 0,0%    | 23    | 100,0%  |
| RCMFE_PHASE1_SCALE_5_ | WOMEN | 42    | 100,0%  | 0       | 0,0%    | 42    | 100,0%  |
| SBP                   | MEN   | 23    | 100,0%  | 0       | 0,0%    | 23    | 100,0%  |
| RCMFE_PHASE2_SCALE_1_ | WOMEN | 42    | 100,0%  | 0       | 0,0%    | 42    | 100,0%  |
| SBP                   | MEN   | 23    | 100,0%  | 0       | 0,0%    | 23    | 100,0%  |
| RCMFE_PHASE2_SCALE_2_ | WOMEN | 42    | 100,0%  | 0       | 0,0%    | 42    | 100,0%  |
| SBP                   | MEN   | 23    | 100,0%  | 0       | 0,0%    | 23    | 100,0%  |
| RCMFE_PHASE2_SCALE_3_ | WOMEN | 42    | 100,0%  | 0       | 0,0%    | 42    | 100,0%  |
| SBP                   | MEN   | 23    | 100,0%  | 0       | 0,0%    | 23    | 100,0%  |
| RCMFE_PHASE2_SCALE_4_ | WOMEN | 42    | 100,0%  | 0       | 0,0%    | 42    | 100,0%  |
| SBP                   | MEN   | 23    | 100,0%  | 0       | 0,0%    | 23    | 100,0%  |
| RCMFE_PHASE2_SCALE_5_ | WOMEN | 42    | 100,0%  | 0       | 0,0%    | 42    | 100,0%  |
| SBP                   | MEN   | 23    | 100,0%  | 0       | 0,0%    | 23    | 100,0%  |
| RCMFE_PHASE3_SCALE_1_ | WOMEN | 42    | 100,0%  | 0       | 0,0%    | 42    | 100,0%  |
| SBP                   | MEN   | 23    | 100,0%  | 0       | 0,0%    | 23    | 100,0%  |
| RCMFE_PHASE3_SCALE_2_ | WOMEN | 42    | 100,0%  | 0       | 0,0%    | 42    | 100,0%  |
| SBP                   | MEN   | 23    | 100,0%  | 0       | 0,0%    | 23    | 100,0%  |
| RCMFE_PHASE3_SCALE_3_ | WOMEN | 42    | 100,0%  | 0       | 0,0%    | 42    | 100,0%  |
| SBP                   | MEN   | 23    | 100,0%  | 0       | 0,0%    | 23    | 100,0%  |
| RCMFE_PHASE3_SCALE_4_ | WOMEN | 42    | 100,0%  | 0       | 0,0%    | 42    | 100,0%  |
| SBP                   | MEN   | 23    | 100,0%  | 0       | 0,0%    | 23    | 100,0%  |
| RCMFE_PHASE3_SCALE_5_ | WOMEN | 42    | 100,0%  | 0       | 0,0%    | 42    | 100,0%  |
| SBP                   | MEN   | 23    | 100,0%  | 0       | 0,0%    | 23    | 100,0%  |
| RCMFE_PHASE4_SCALE_1_ | WOMEN | 42    | 100,0%  | 0       | 0,0%    | 42    | 100,0%  |
| SBP                   | MEN   | 23    | 100,0%  | 0       | 0,0%    | 23    | 100,0%  |
| RCMFE_PHASE4_SCALE_2_ | WOMEN | 42    | 100,0%  | 0       | 0,0%    | 42    | 100,0%  |
| SBP                   | MEN   | 23    | 100,0%  | 0       | 0,0%    | 23    | 100,0%  |
| RCMFE_PHASE4_SCALE_3_ | WOMEN | 42    | 100,0%  | 0       | 0,0%    | 42    | 100,0%  |
| SBP                   | MEN   | 23    | 100,0%  | 0       | 0,0%    | 23    | 100,0%  |
| RCMFE_PHASE4_SCALE_4_ | WOMEN | 42    | 100,0%  | 0       | 0,0%    | 42    | 100,0%  |
| SBP                   | MEN   | 23    | 100,0%  | 0       | 0,0%    | 23    | 100,0%  |
| RCMFE_PHASE4_SCALE_5_ | WOMEN | 42    | 100,0%  | 0       | 0,0%    | 42    | 100,0%  |
| SBP                   | MEN   | 23    | 100,0%  | 0       | 0,0%    | 23    | 100,0%  |
| RCMFE_PHASE5_SCALE_1_ | WOMEN | 42    | 100,0%  | 0       | 0,0%    | 42    | 100,0%  |
| SBP                   |       |       |         |         |         |       |         |

### Case Processing Summary

| GENDER                |       | Cases |         |         |         |       |         |
|-----------------------|-------|-------|---------|---------|---------|-------|---------|
|                       |       | Valid |         | Missing |         | Total |         |
|                       |       | N     | Percent | N       | Percent | N     | Percent |
| RCMFE_PHASE5_SCALE_1_ | MEN   | 23    | 100,0%  | 0       | 0,0%    | 23    | 100,0%  |
| SBP                   |       |       |         |         |         |       |         |
| RCMFE_PHASE5_SCALE_2_ | WOMEN | 42    | 100,0%  | 0       | 0,0%    | 42    | 100,0%  |
| SBP                   |       |       |         |         |         |       |         |
|                       | MEN   | 23    | 100,0%  | 0       | 0,0%    | 23    | 100,0%  |
| RCMFE_PHASE5_SCALE_3_ | WOMEN | 42    | 100,0%  | 0       | 0,0%    | 42    | 100,0%  |
| SBP                   |       |       |         |         |         |       |         |
|                       | MEN   | 23    | 100,0%  | 0       | 0,0%    | 23    | 100,0%  |
| RCMFE_PHASE5_SCALE_4_ | WOMEN | 42    | 100,0%  | 0       | 0,0%    | 42    | 100,0%  |
| SBP                   |       |       |         |         |         |       |         |
|                       | MEN   | 23    | 100,0%  | 0       | 0,0%    | 23    | 100,0%  |
| RCMFE_PHASE5_SCALE_5_ | WOMEN | 42    | 100,0%  | 0       | 0,0%    | 42    | 100,0%  |
| SBP                   |       |       |         |         |         |       |         |
|                       | MEN   | 23    | 100,0%  | 0       | 0,0%    | 23    | 100,0%  |

### Tests of Normality

| GENDER                |       | Kolmogorov-Smirnov <sup>a</sup> |    |       | Shapiro-Wilk |    |      |
|-----------------------|-------|---------------------------------|----|-------|--------------|----|------|
|                       |       | Statistic                       | df | Sig.  | Statistic    | df | Sig. |
| RCMFE_PHASE1_SCALE_1_ | WOMEN | ,086                            | 42 | ,200* | ,978         | 42 | ,602 |
| SBP                   |       |                                 |    |       |              |    |      |
|                       | MEN   | ,115                            | 23 | ,200* | ,971         | 23 | ,718 |
| RCMFE_PHASE1_SCALE_2_ | WOMEN | ,085                            | 42 | ,200* | ,972         | 42 | ,372 |
| SBP                   |       |                                 |    |       |              |    |      |
|                       | MEN   | ,122                            | 23 | ,200* | ,964         | 23 | ,540 |
| RCMFE_PHASE1_SCALE_3_ | WOMEN | ,112                            | 42 | ,200* | ,960         | 42 | ,148 |
| SBP                   |       |                                 |    |       |              |    |      |
|                       | MEN   | ,081                            | 23 | ,200* | ,973         | 23 | ,767 |
| RCMFE_PHASE1_SCALE_4_ | WOMEN | ,127                            | 42 | ,088  | ,948         | 42 | ,056 |
| SBP                   |       |                                 |    |       |              |    |      |
|                       | MEN   | ,120                            | 23 | ,200* | ,954         | 23 | ,357 |
| RCMFE_PHASE1_SCALE_5_ | WOMEN | ,084                            | 42 | ,200* | ,988         | 42 | ,942 |
| SBP                   |       |                                 |    |       |              |    |      |
|                       | MEN   | ,094                            | 23 | ,200* | ,974         | 23 | ,790 |
| RCMFE_PHASE2_SCALE_1_ | WOMEN | ,059                            | 42 | ,200* | ,982         | 42 | ,725 |
| SBP                   |       |                                 |    |       |              |    |      |
|                       | MEN   | ,123                            | 23 | ,200* | ,984         | 23 | ,957 |
| RCMFE_PHASE2_SCALE_2_ | WOMEN | ,085                            | 42 | ,200* | ,988         | 42 | ,924 |
| SBP                   |       |                                 |    |       |              |    |      |
|                       | MEN   | ,129                            | 23 | ,200* | ,974         | 23 | ,775 |
| RCMFE_PHASE2_SCALE_3_ | WOMEN | ,092                            | 42 | ,200* | ,988         | 42 | ,926 |
| SBP                   |       |                                 |    |       |              |    |      |
|                       | MEN   | ,190                            | 23 | ,031  | ,929         | 23 | ,103 |
| RCMFE_PHASE2_SCALE_4_ | WOMEN | ,080                            | 42 | ,200* | ,977         | 42 | ,533 |
| SBP                   |       |                                 |    |       |              |    |      |
|                       | MEN   | ,234                            | 23 | ,022  | ,876         | 23 | ,068 |
| RCMFE_PHASE2_SCALE_5_ | WOMEN | ,097                            | 42 | ,200* | ,972         | 42 | ,396 |
| SBP                   |       |                                 |    |       |              |    |      |
|                       | MEN   | ,186                            | 23 | ,038  | ,901         | 23 | ,056 |
| RCMFE_PHASE3_SCALE_1_ | WOMEN | ,095                            | 42 | ,200* | ,967         | 42 | ,258 |
| SBP                   |       |                                 |    |       |              |    |      |
|                       | MEN   | ,135                            | 23 | ,200* | ,935         | 23 | ,143 |
| RCMFE_PHASE3_SCALE_2_ | WOMEN | ,132                            | 42 | ,062  | ,966         | 42 | ,243 |
| SBP                   |       |                                 |    |       |              |    |      |
|                       | MEN   | ,099                            | 23 | ,200* | ,988         | 23 | ,993 |
| RCMFE_PHASE3_SCALE_3_ | WOMEN | ,079                            | 42 | ,200* | ,981         | 42 | ,683 |
| SBP                   |       |                                 |    |       |              |    |      |
|                       | MEN   | ,126                            | 23 | ,200* | ,963         | 23 | ,527 |
| RCMFE_PHASE3_SCALE_4_ | WOMEN | ,087                            | 42 | ,200* | ,973         | 42 | ,403 |
| SBP                   |       |                                 |    |       |              |    |      |
|                       | MEN   | ,133                            | 23 | ,200* | ,952         | 23 | ,317 |
| RCMFE_PHASE3_SCALE_5_ | WOMEN | ,062                            | 42 | ,200* | ,986         | 42 | ,871 |

|                       |       |      |    |       |      |    |      |
|-----------------------|-------|------|----|-------|------|----|------|
| SBP                   | MEN   | ,081 | 23 | ,200* | ,967 | 23 | ,628 |
| RCMFE_PHASE4_SCALE_1_ | WOMEN | ,082 | 42 | ,200* | ,964 | 42 | ,205 |
| SBP                   | MEN   | ,199 | 23 | ,018  | ,929 | 23 | ,102 |
| RCMFE_PHASE4_SCALE_2_ | WOMEN | ,113 | 42 | ,200* | ,941 | 42 | ,051 |
| SBP                   | MEN   | ,156 | 23 | ,151  | ,949 | 23 | ,277 |
| RCMFE_PHASE4_SCALE_3_ | WOMEN | ,109 | 42 | ,200* | ,937 | 42 | ,053 |
|                       | MEN   | ,160 | 23 | ,131  | ,944 | 23 | ,214 |
| RCMFE_PHASE4_SCALE_4_ | WOMEN | ,132 | 42 | ,063  | ,957 | 42 | ,114 |
| SBP                   | MEN   | ,171 | 23 | ,079  | ,930 | 23 | ,107 |
| RCMFE_PHASE4_SCALE_5_ | WOMEN | ,109 | 42 | ,200* | ,952 | 42 | ,076 |
| SBP                   | MEN   | ,133 | 23 | ,200* | ,928 | 23 | ,101 |
| RCMFE_PHASE5_SCALE_1_ | WOMEN | ,065 | 42 | ,200* | ,977 | 42 | ,548 |
| SBP                   | MEN   | ,151 | 23 | ,185  | ,967 | 23 | ,627 |

#### Tests of Normality

| GENDER                      | Kolmogorov-Smirnov <sup>a</sup> |    |       | Shapiro-Wilk |    |      |
|-----------------------------|---------------------------------|----|-------|--------------|----|------|
|                             | Statistic                       | df | Sig.  | Statistic    | df | Sig. |
| RCMFE_PHASE5_SCALE_2_ WOMEN | ,081                            | 42 | ,200* | ,976         | 42 | ,522 |
| SBP MEN                     | ,120                            | 23 | ,200* | ,969         | 23 | ,672 |
| RCMFE_PHASE5_SCALE_3_ WOMEN | ,087                            | 42 | ,200* | ,965         | 42 | ,223 |
| SBP MEN                     | ,103                            | 23 | ,200* | ,959         | 23 | ,445 |
| RCMFE_PHASE5_SCALE_4_ WOMEN | ,065                            | 42 | ,200* | ,975         | 42 | ,466 |
| SBP MEN                     | ,123                            | 23 | ,200* | ,949         | 23 | ,273 |
| RCMFE_PHASE5_SCALE_5_ WOMEN | ,095                            | 42 | ,200  | ,970         | 42 | ,323 |
| SBP MEN                     | ,088                            | 23 | ,200* | ,977         | 23 | ,848 |

\*. This is a lower bound of the true significance.

a. Lilliefors Significance Correction

Normal Q-Q Plots

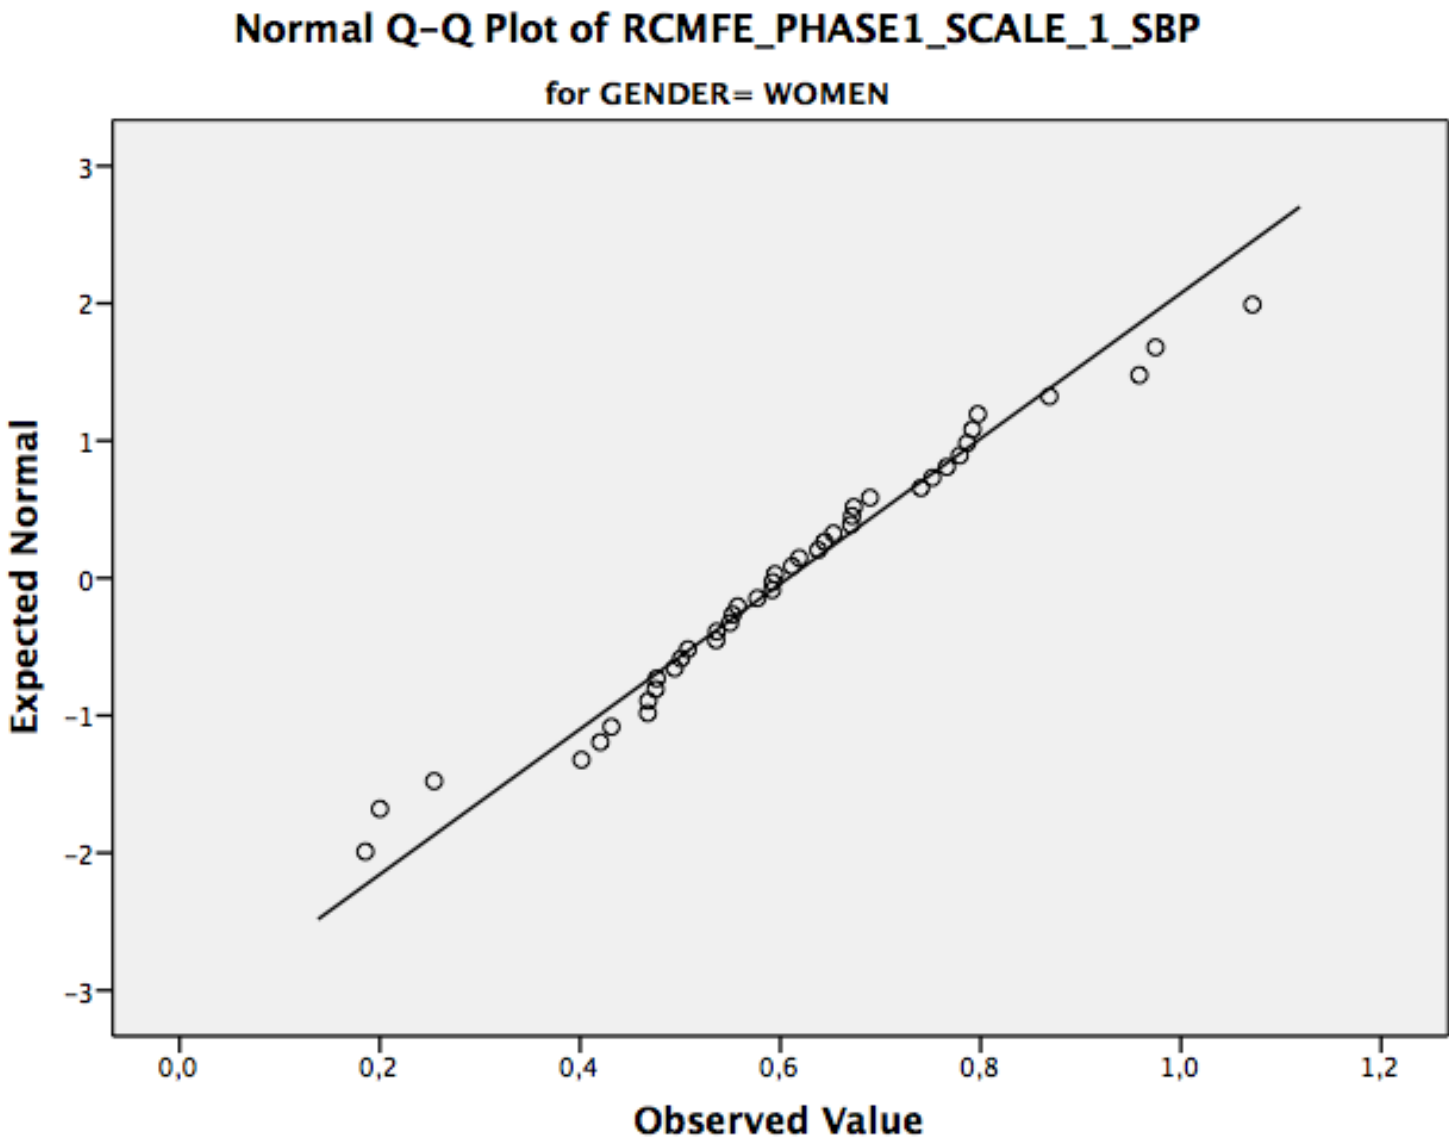



# Normal Q-Q Plot of RCMFE\_PHASE1\_SCALE\_1\_SBP

for GENDER= MEN

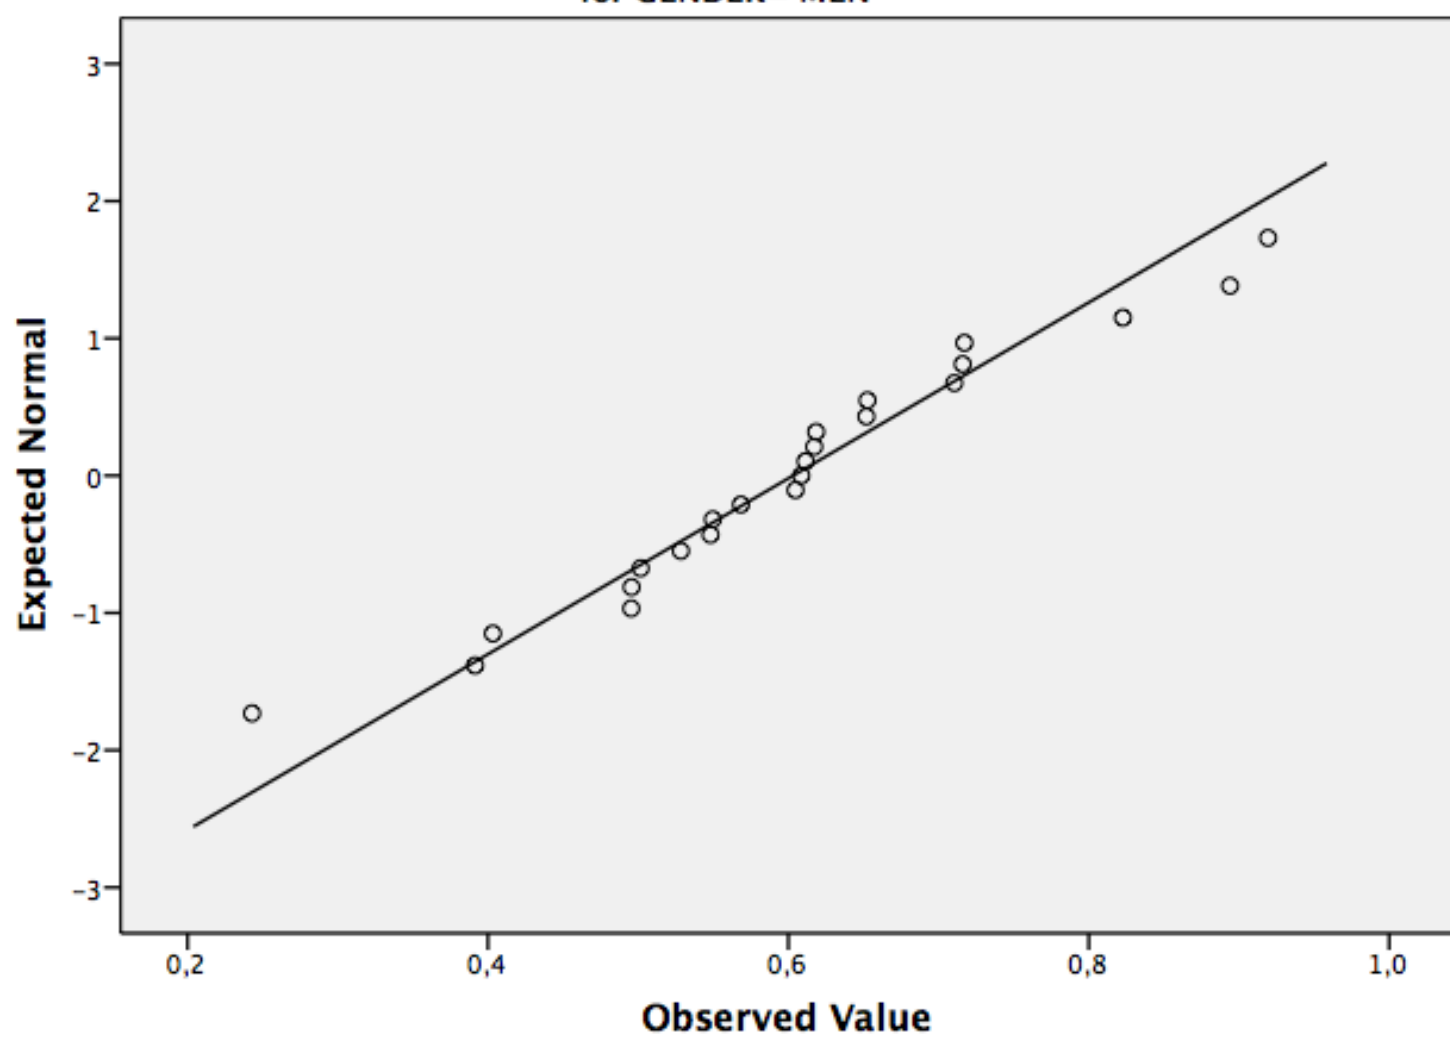

Normal Q-Q Plots

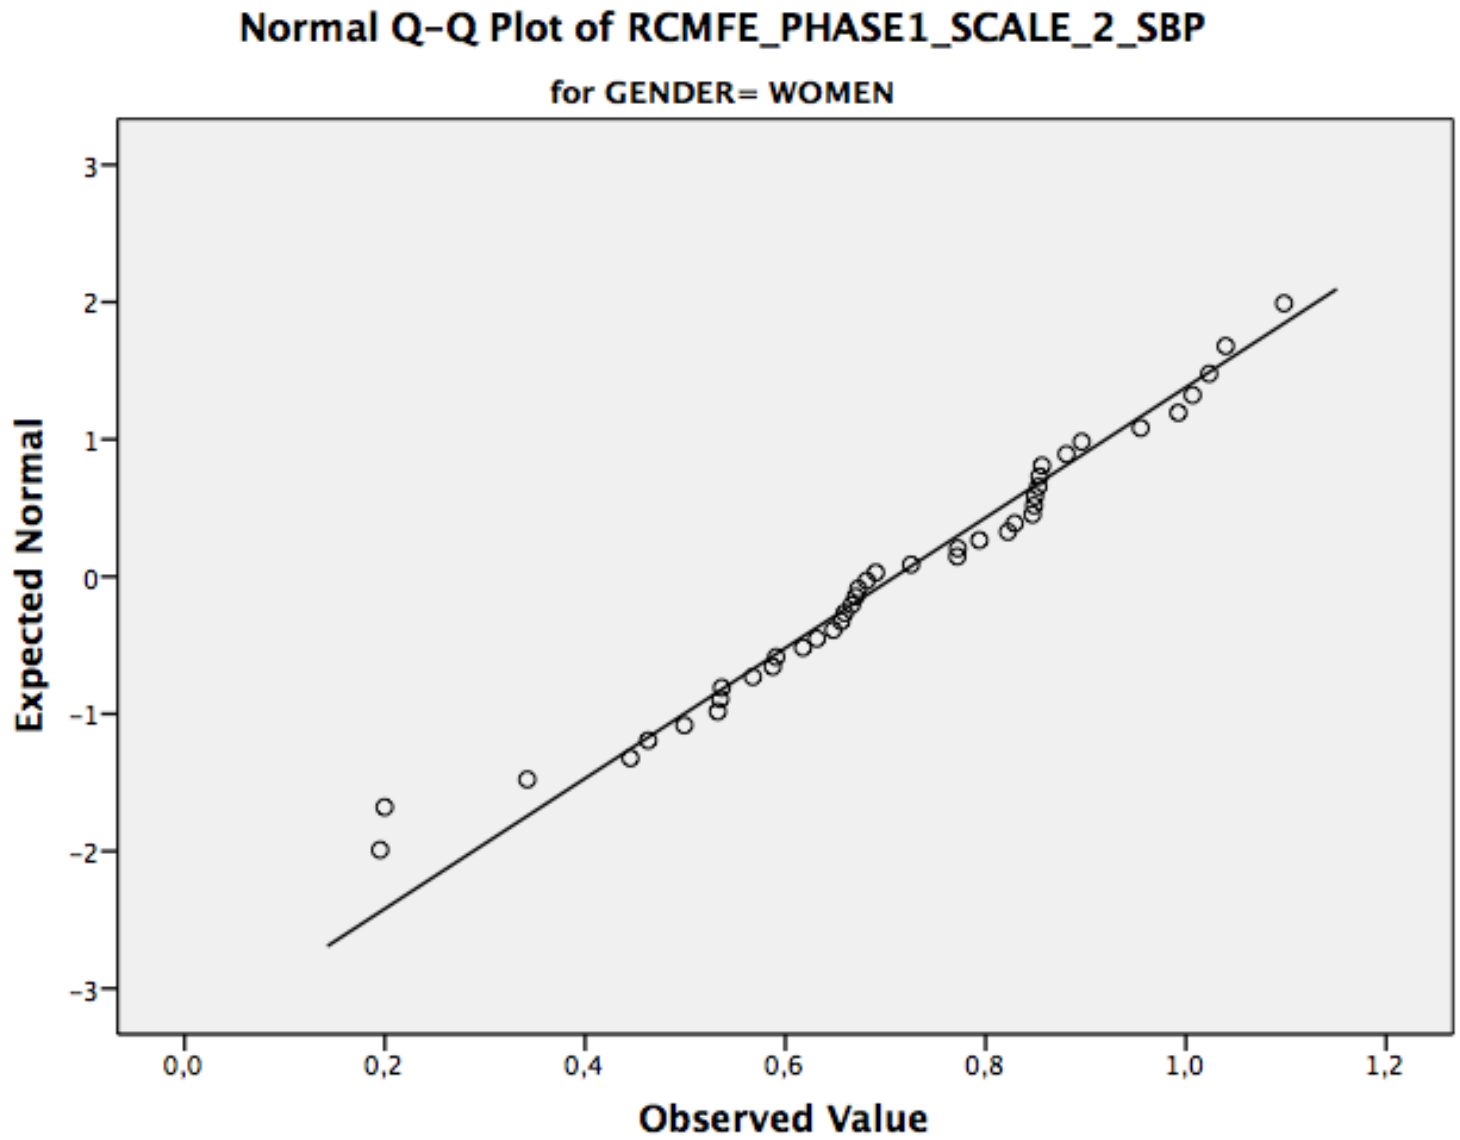

# Normal Q-Q Plot of RCMFE\_PHASE1\_SCALE\_2\_SBP

for GENDER= MEN

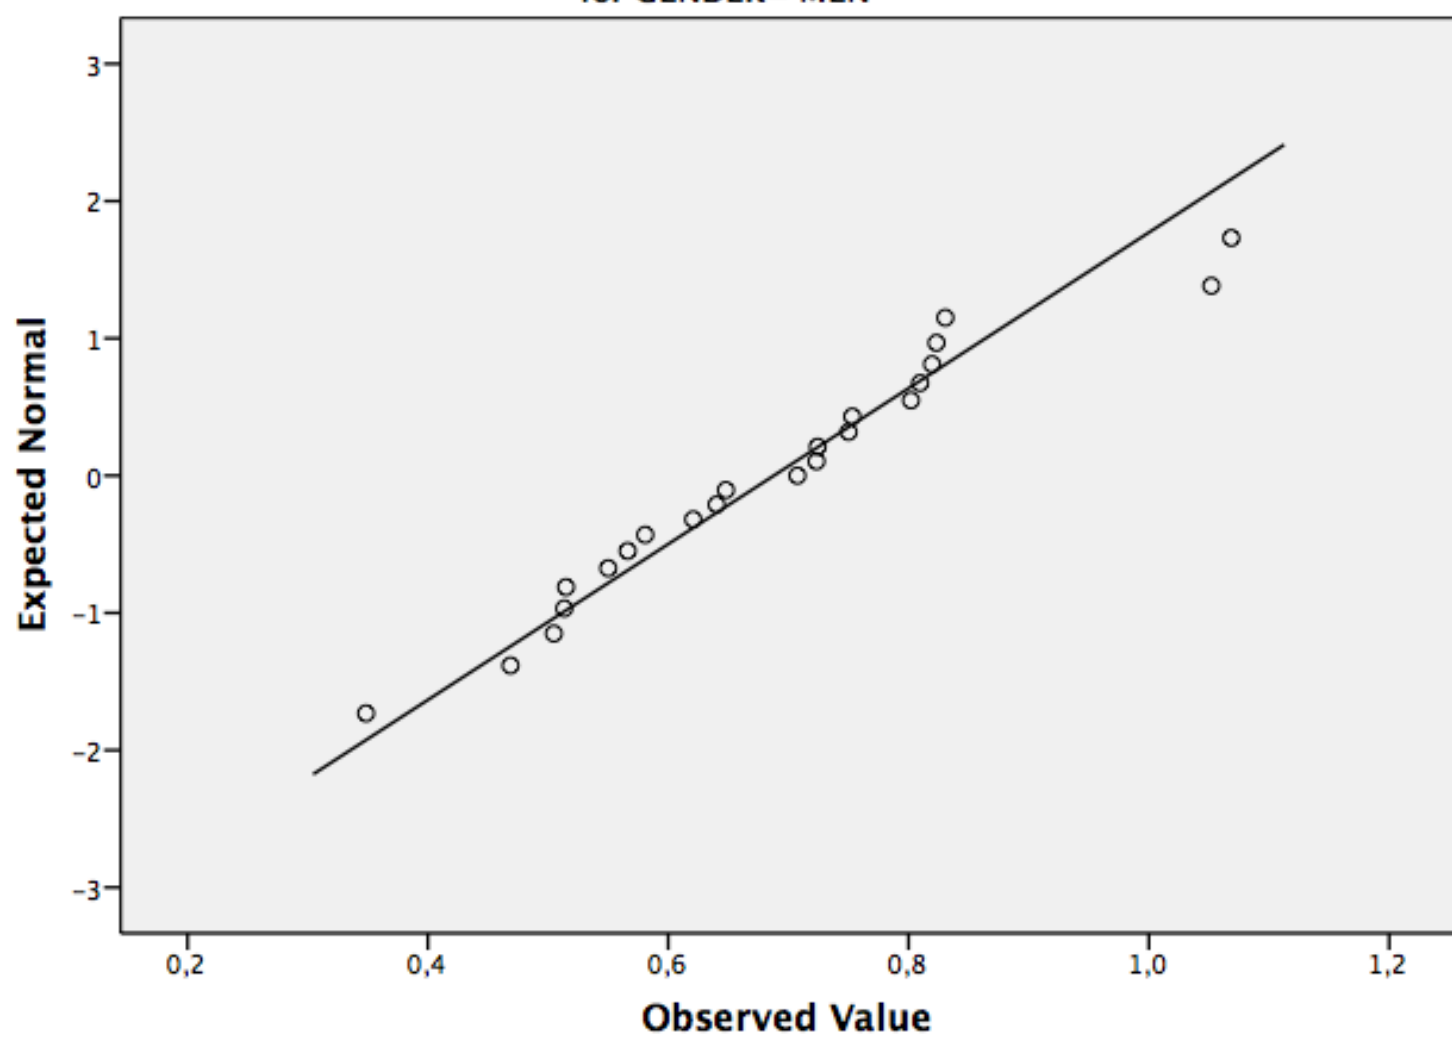

Normal Q-Q Plots

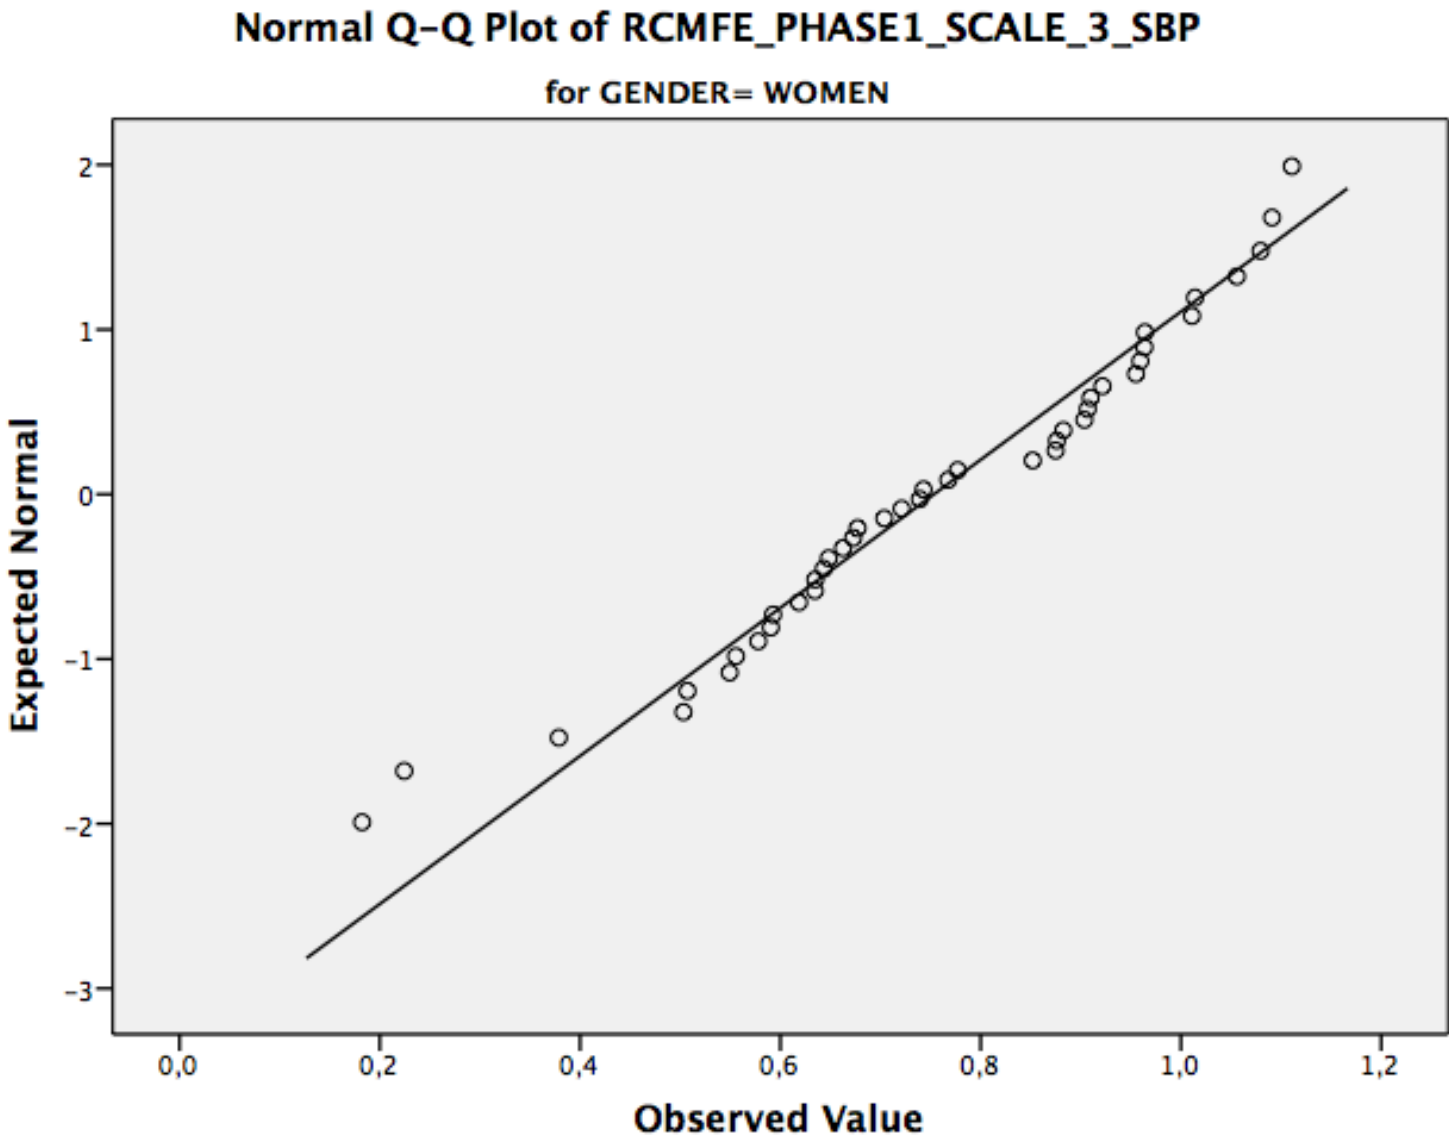

# Normal Q-Q Plot of RCMFE\_PHASE1\_SCALE\_3\_SBP

for GENDER= MEN

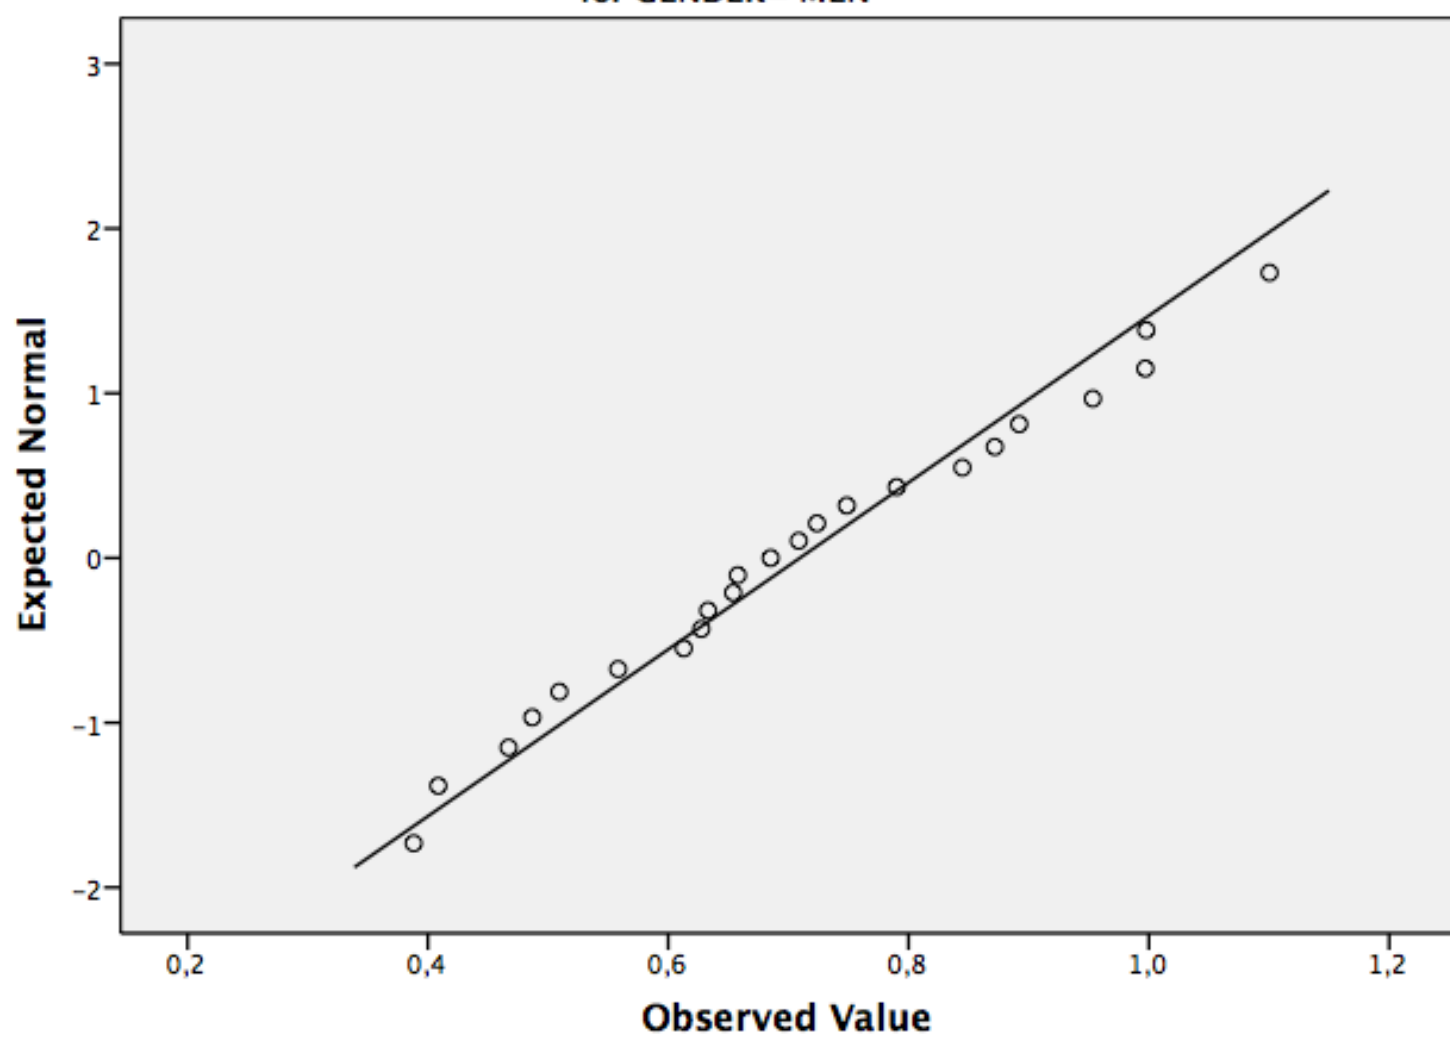

Normal Q-Q Plots

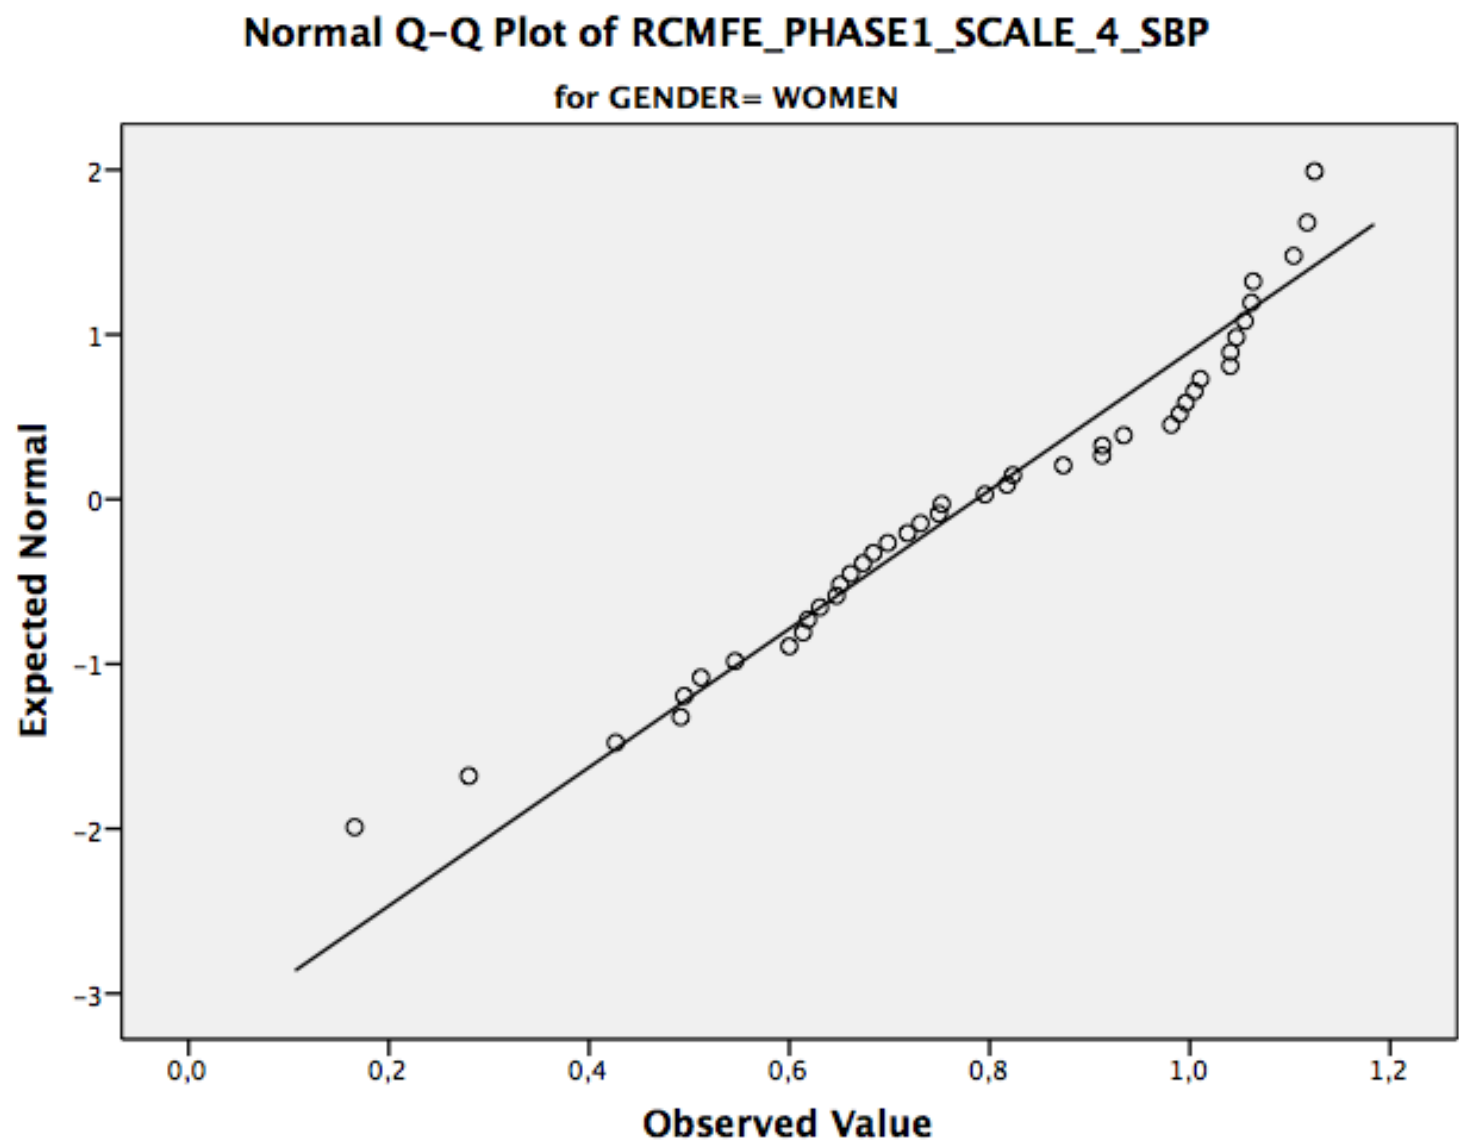

# Normal Q-Q Plot of RCMFE\_PHASE1\_SCALE\_4\_SBP

for GENDER= MEN

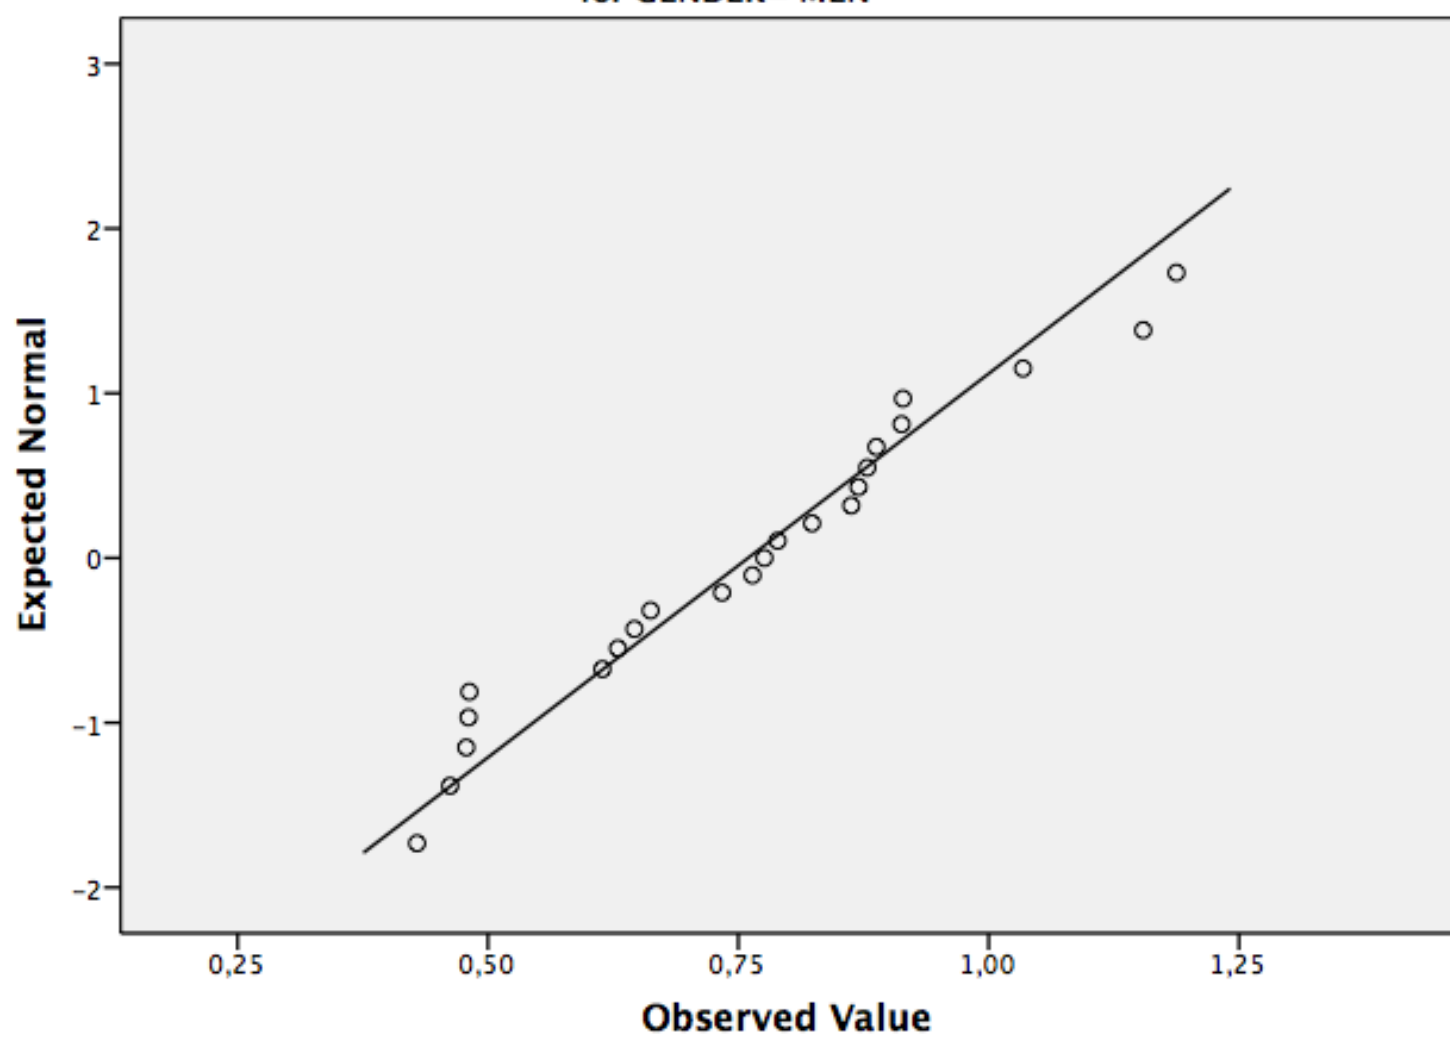

Normal Q-Q Plots

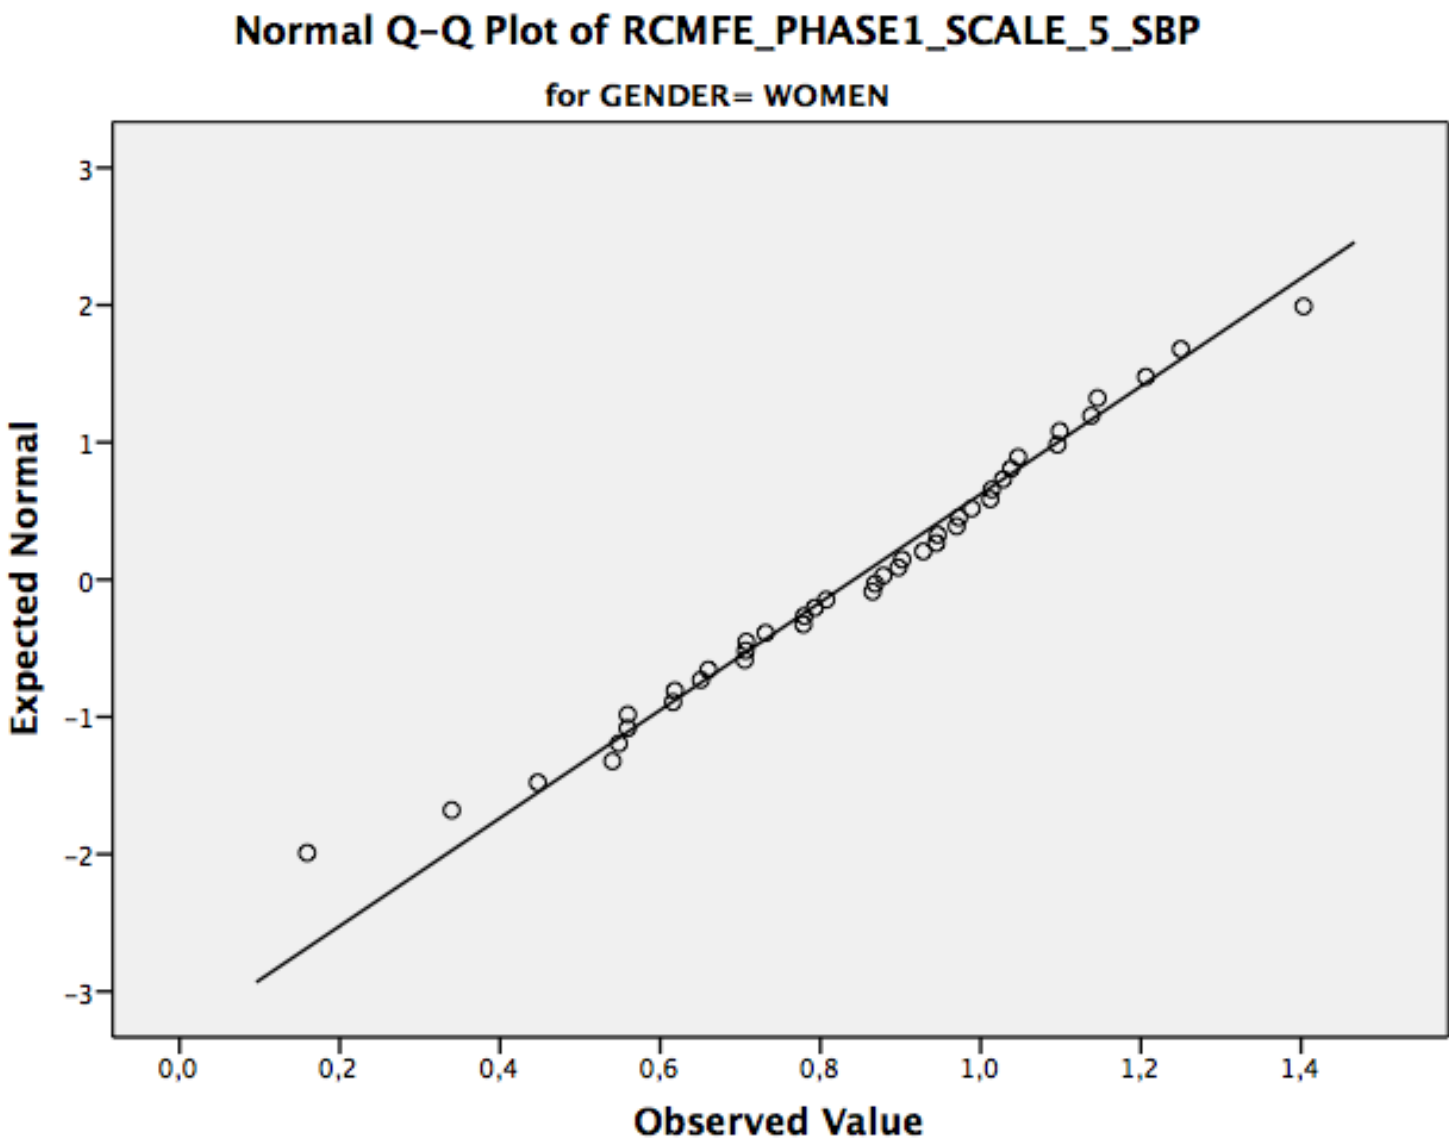



# Normal Q-Q Plot of RCMFE\_PHASE1\_SCALE\_5\_SBP

for GENDER= MEN

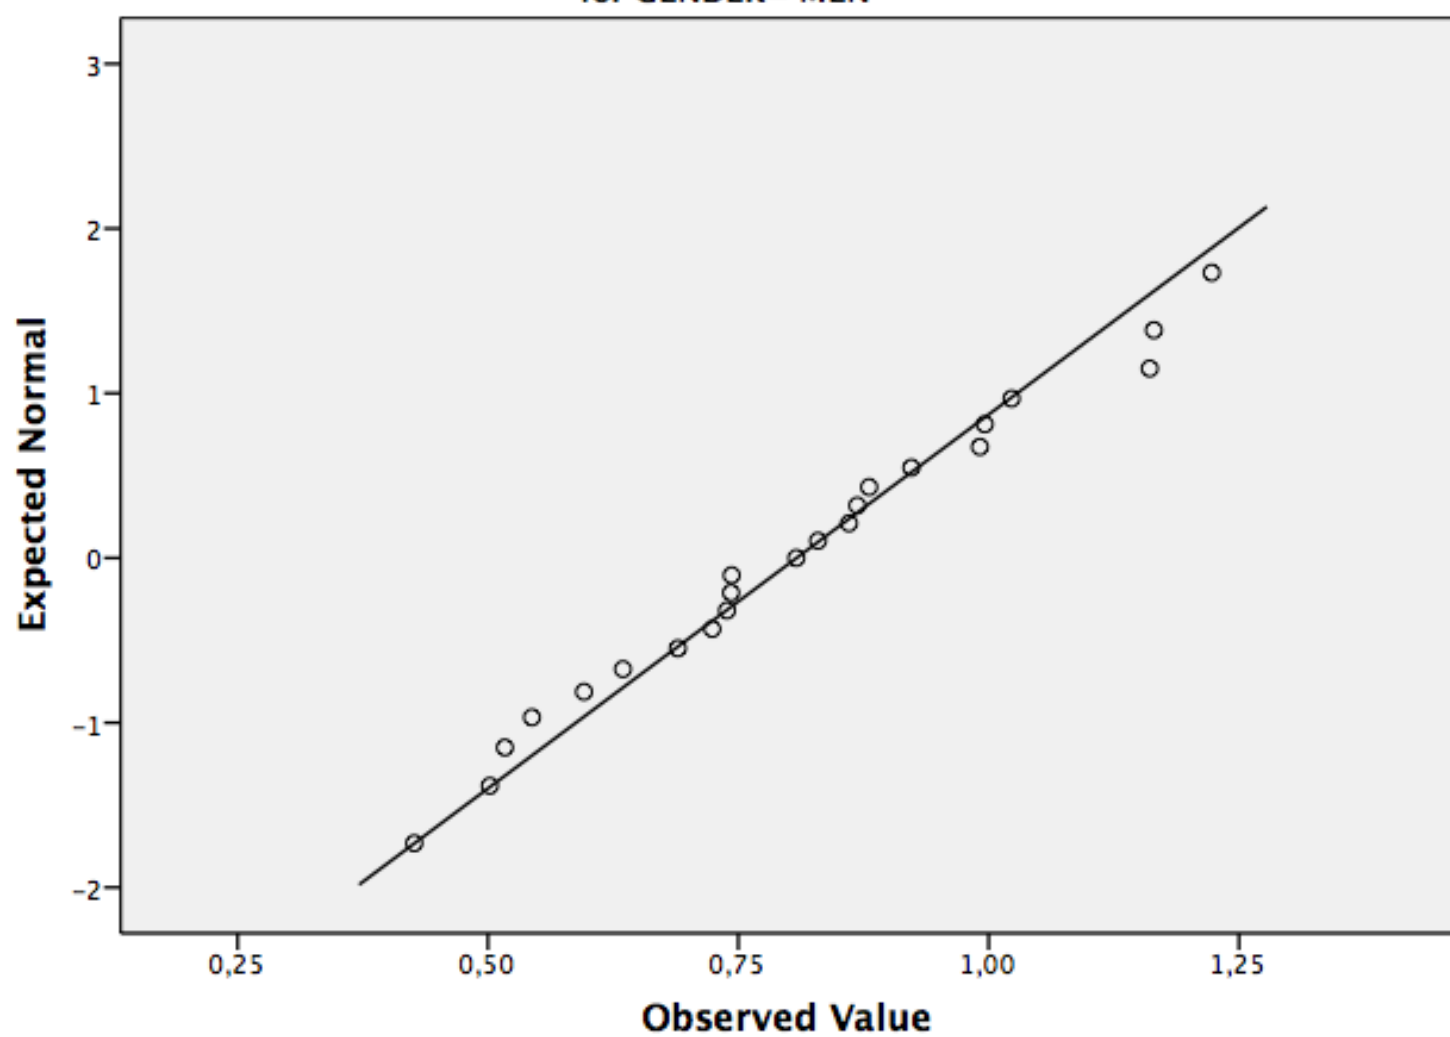

Normal Q-Q Plots

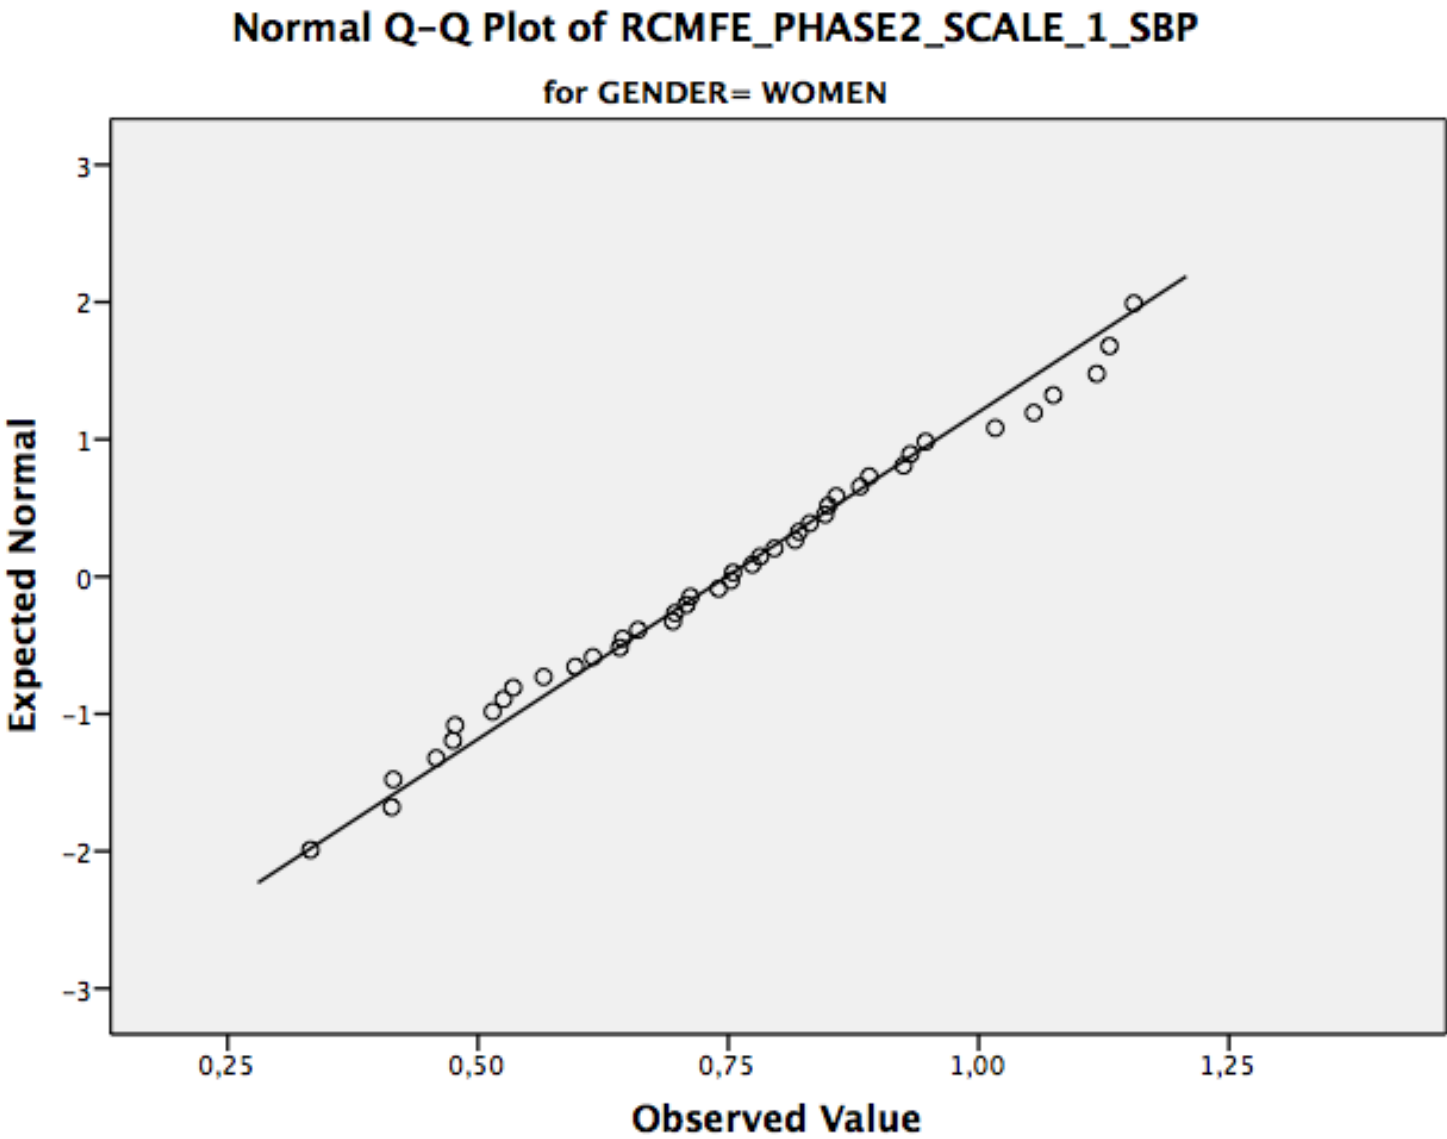

# Normal Q-Q Plot of RCMFE\_PHASE2\_SCALE\_1\_SBP

for GENDER= MEN

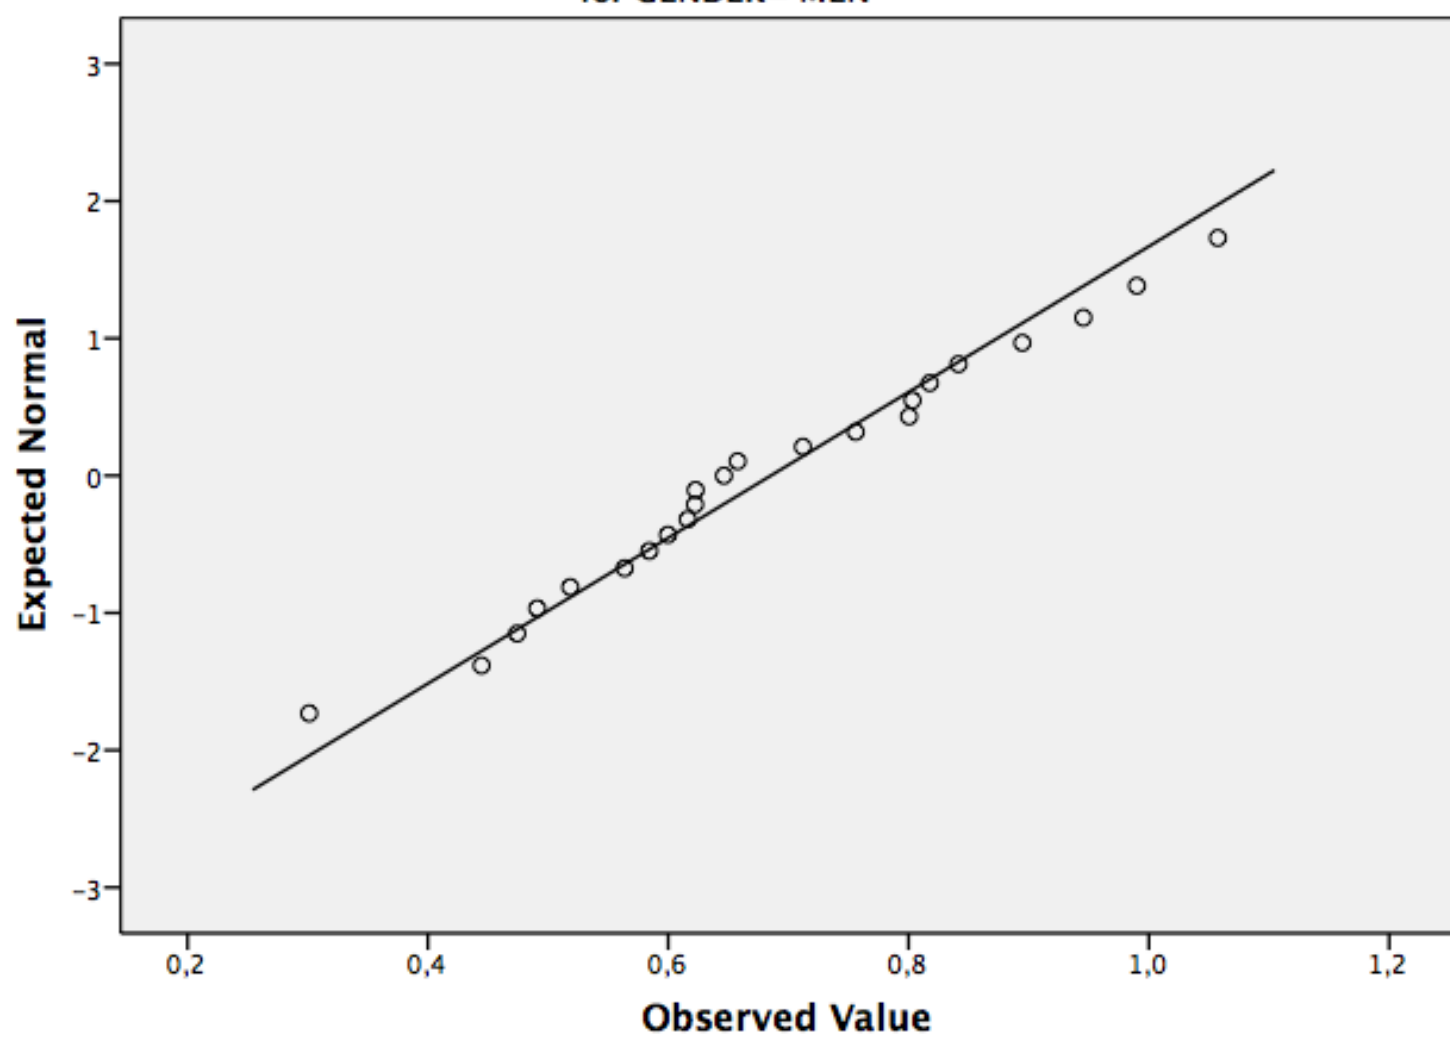

Normal Q-Q Plots

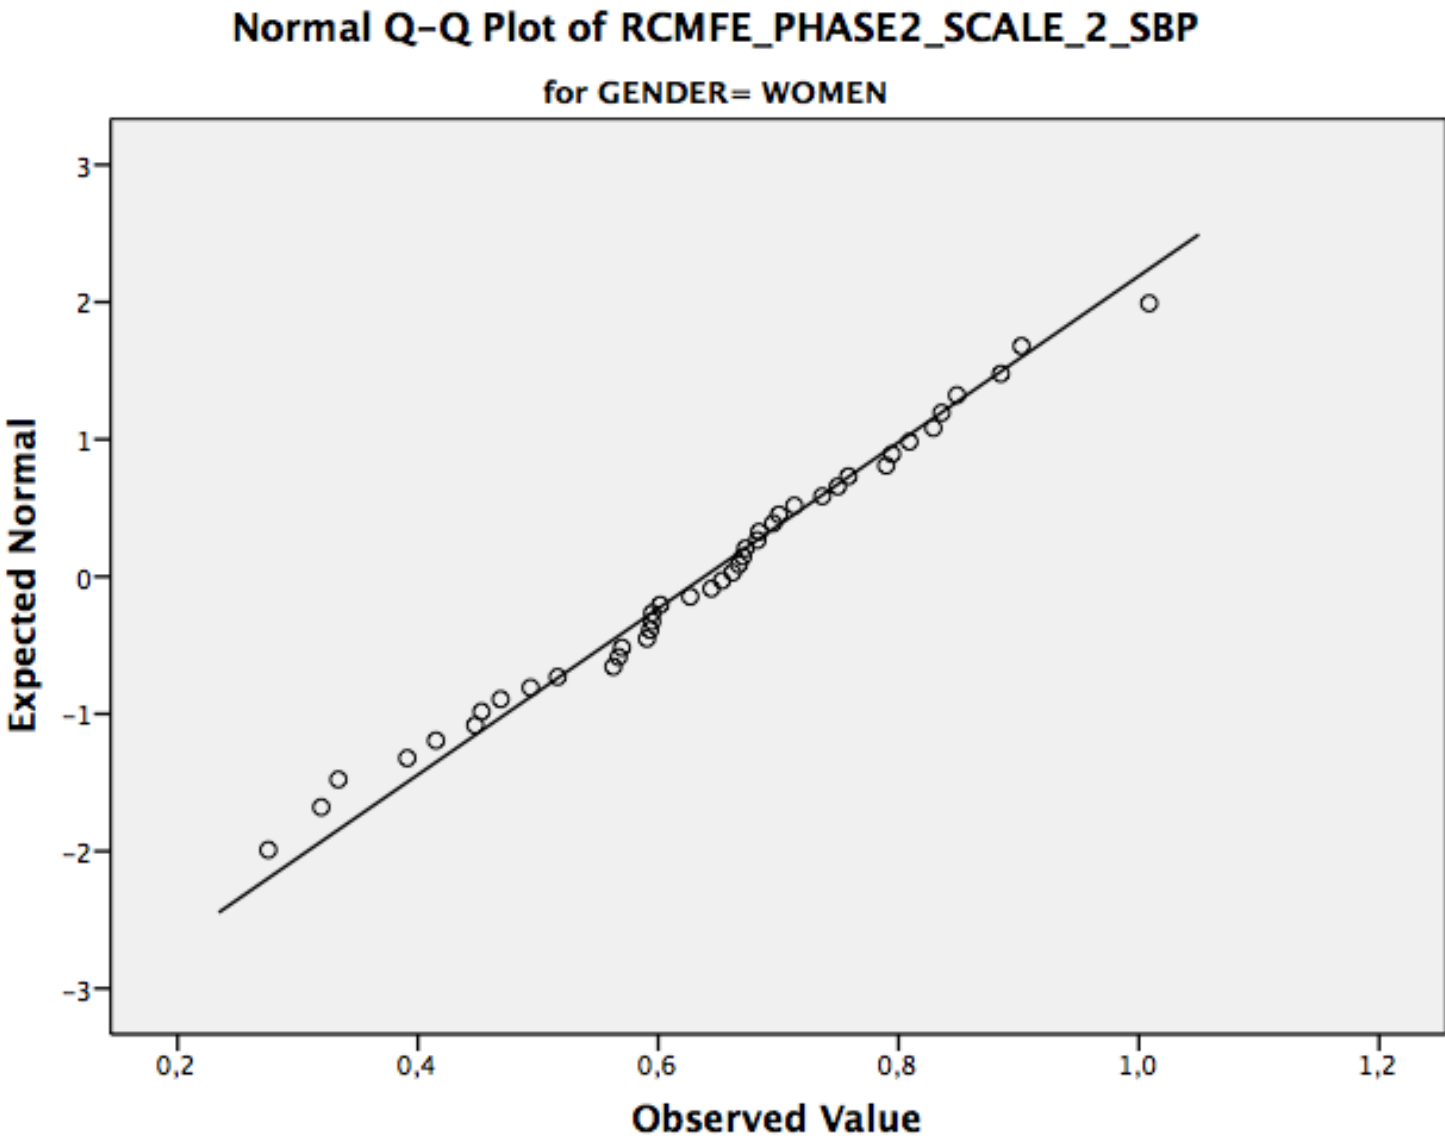

# Normal Q-Q Plot of RCMFE\_PHASE2\_SCALE\_2\_SBP

for GENDER= MEN

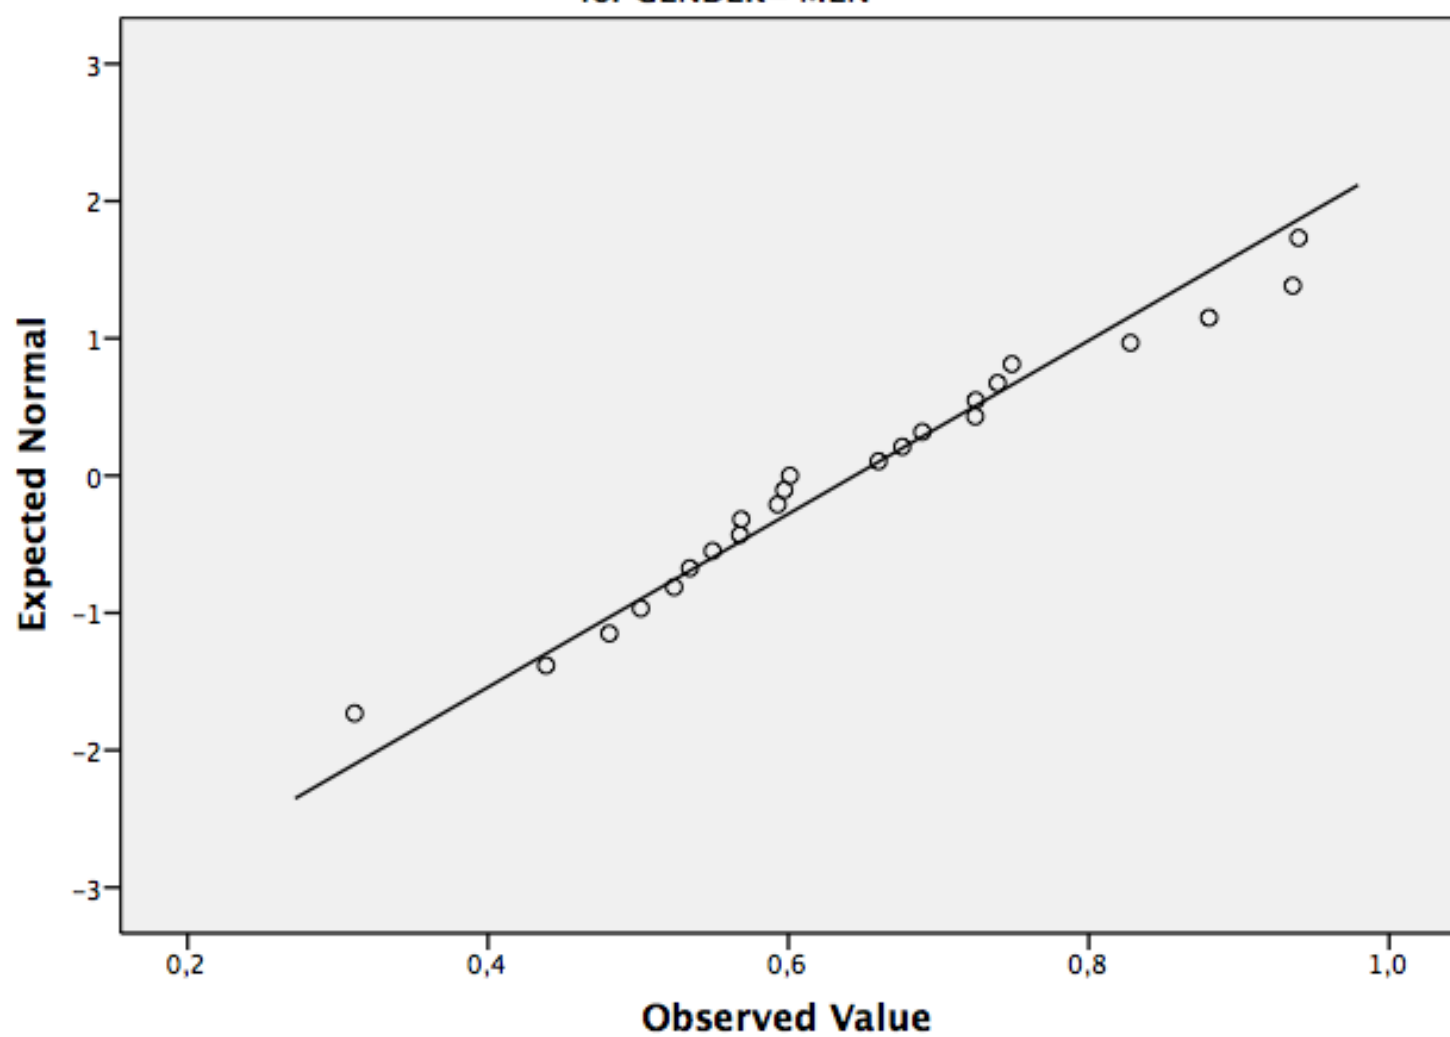

Normal Q-Q Plots

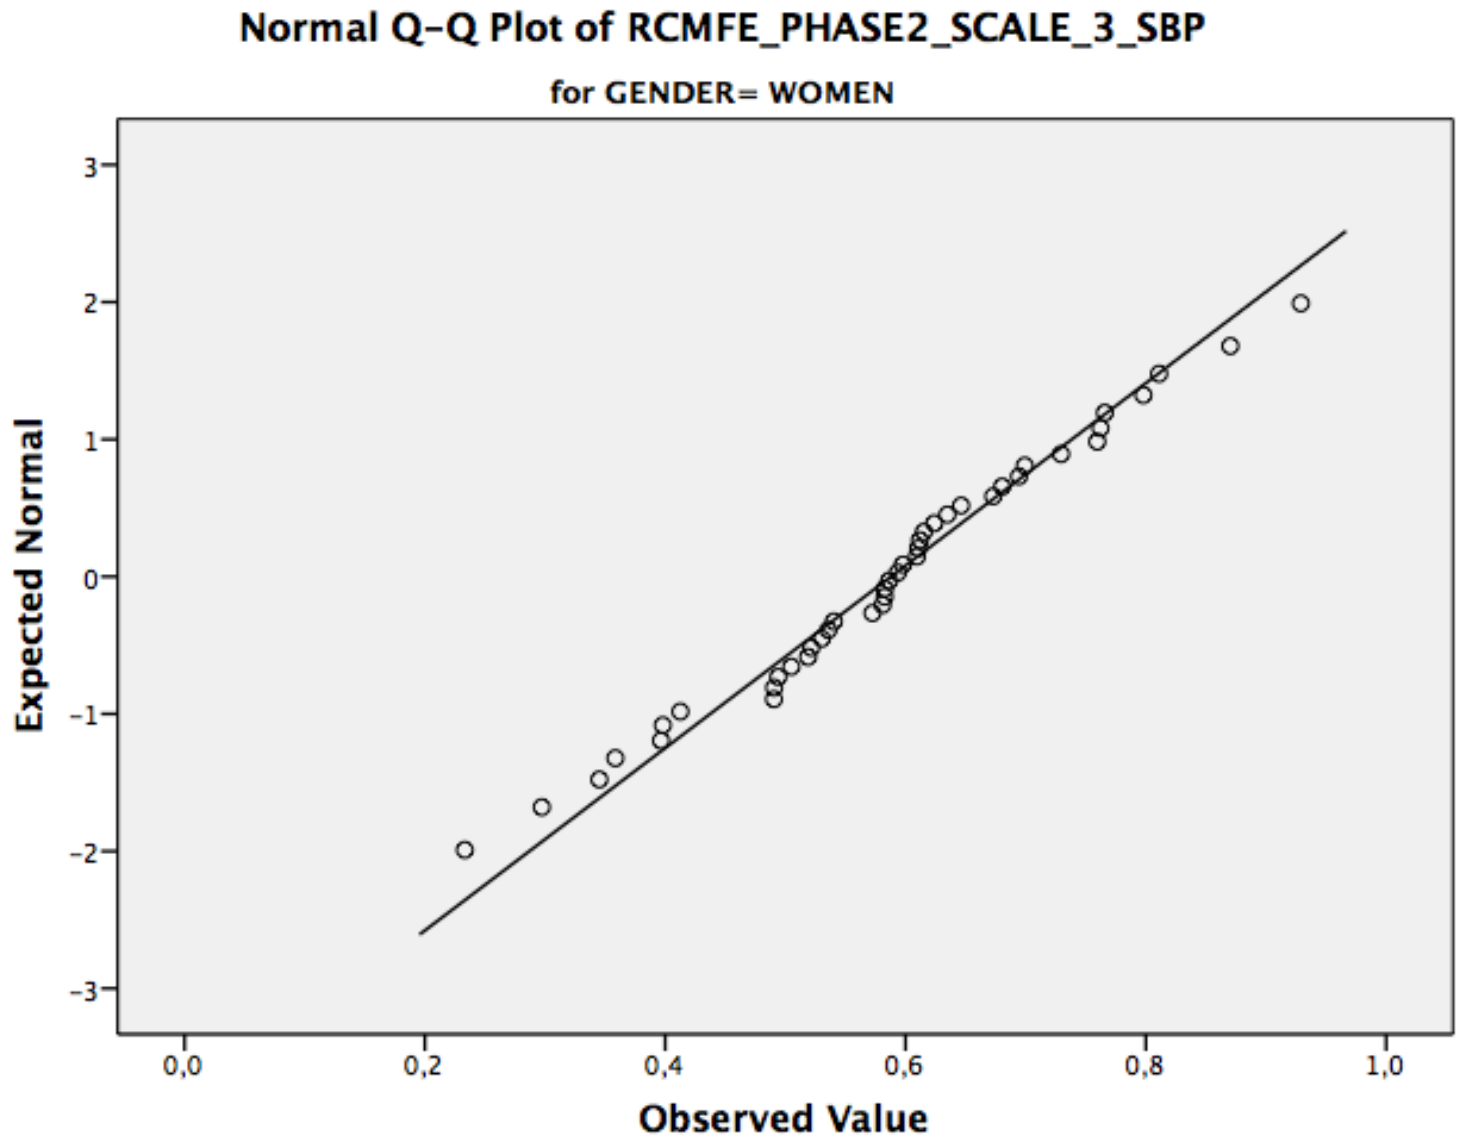

# Normal Q-Q Plot of RCMFE\_PHASE2\_SCALE\_3\_SBP

for GENDER= MEN

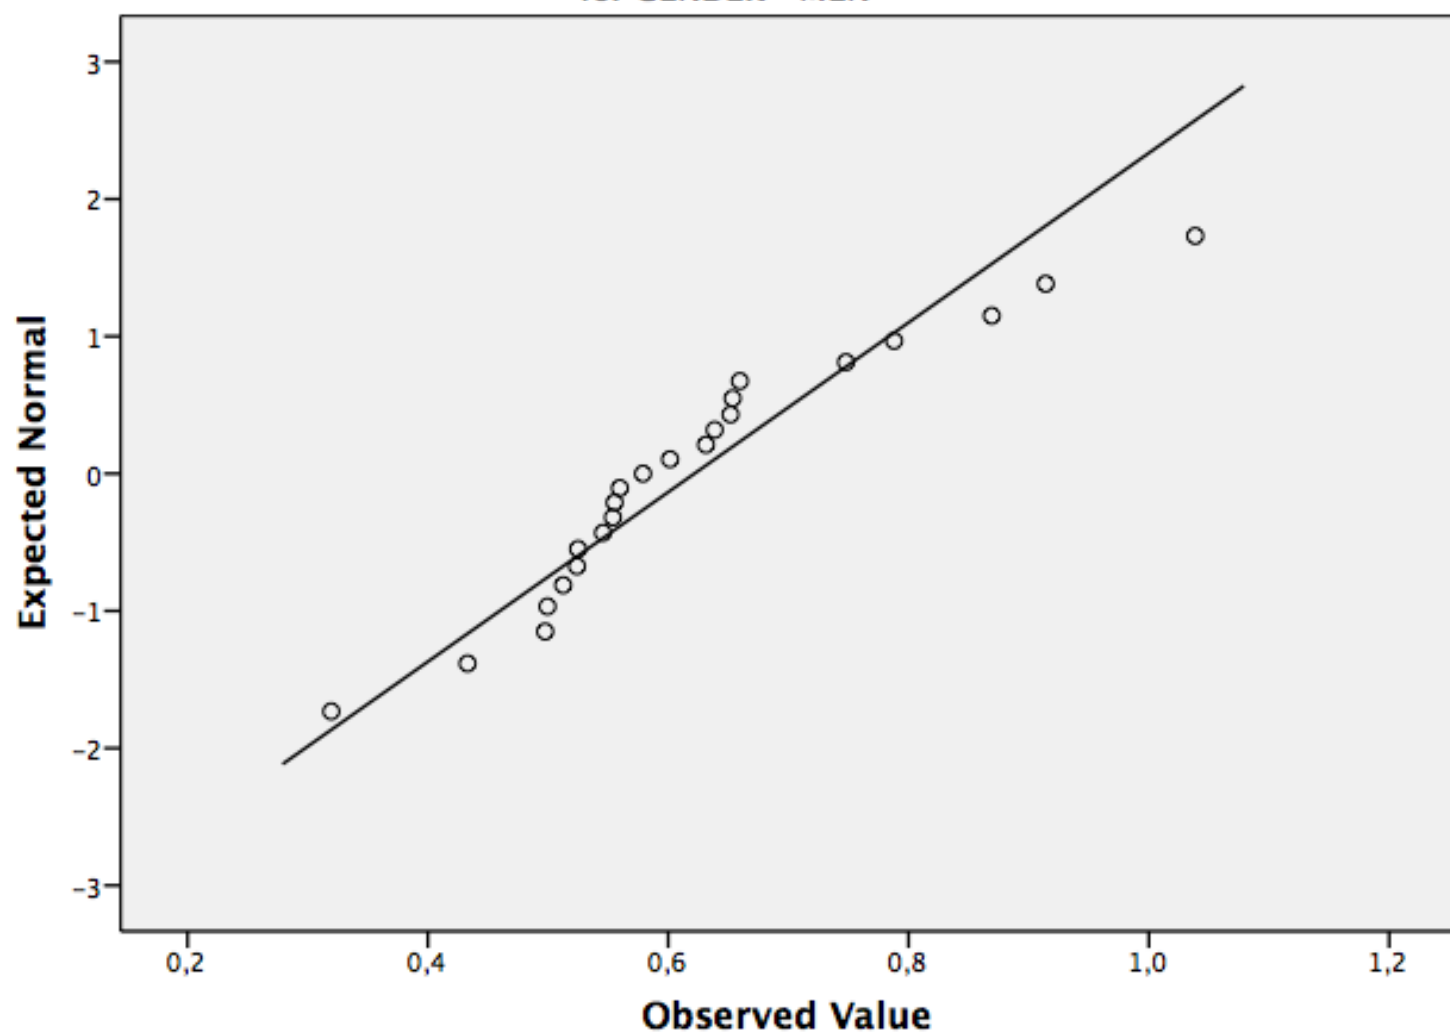

## Normal Q-Q Plots

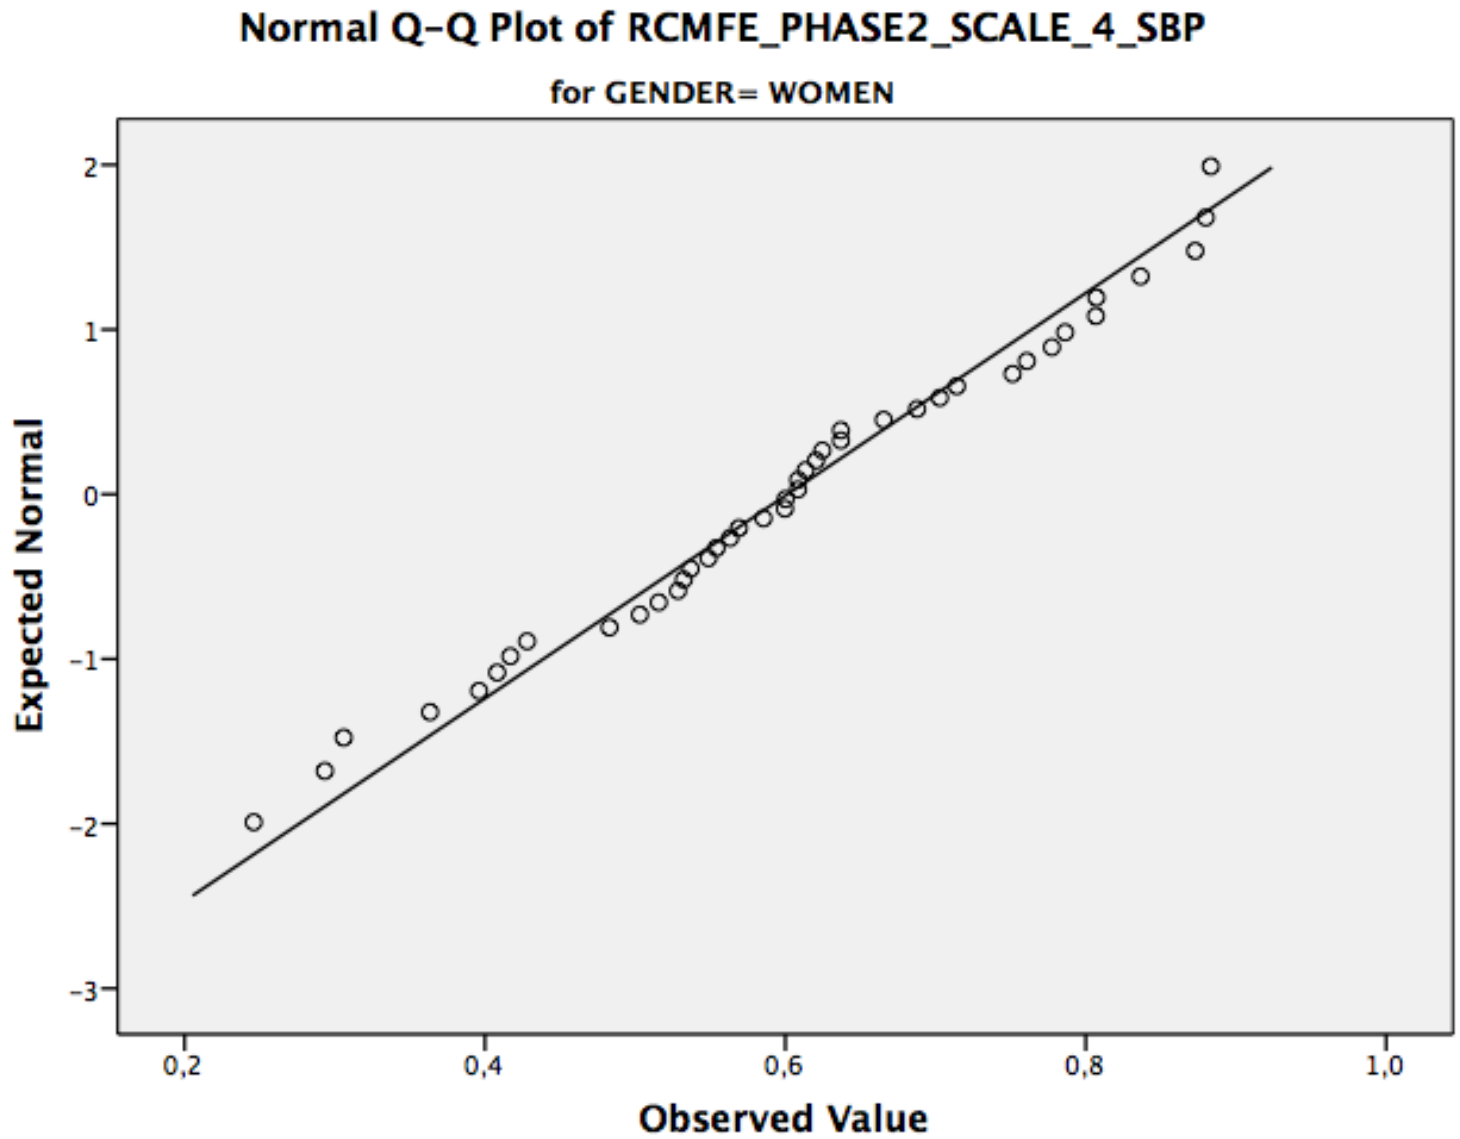



# Normal Q-Q Plot of RCMFE\_PHASE2\_SCALE\_4\_SBP

for GENDER= MEN

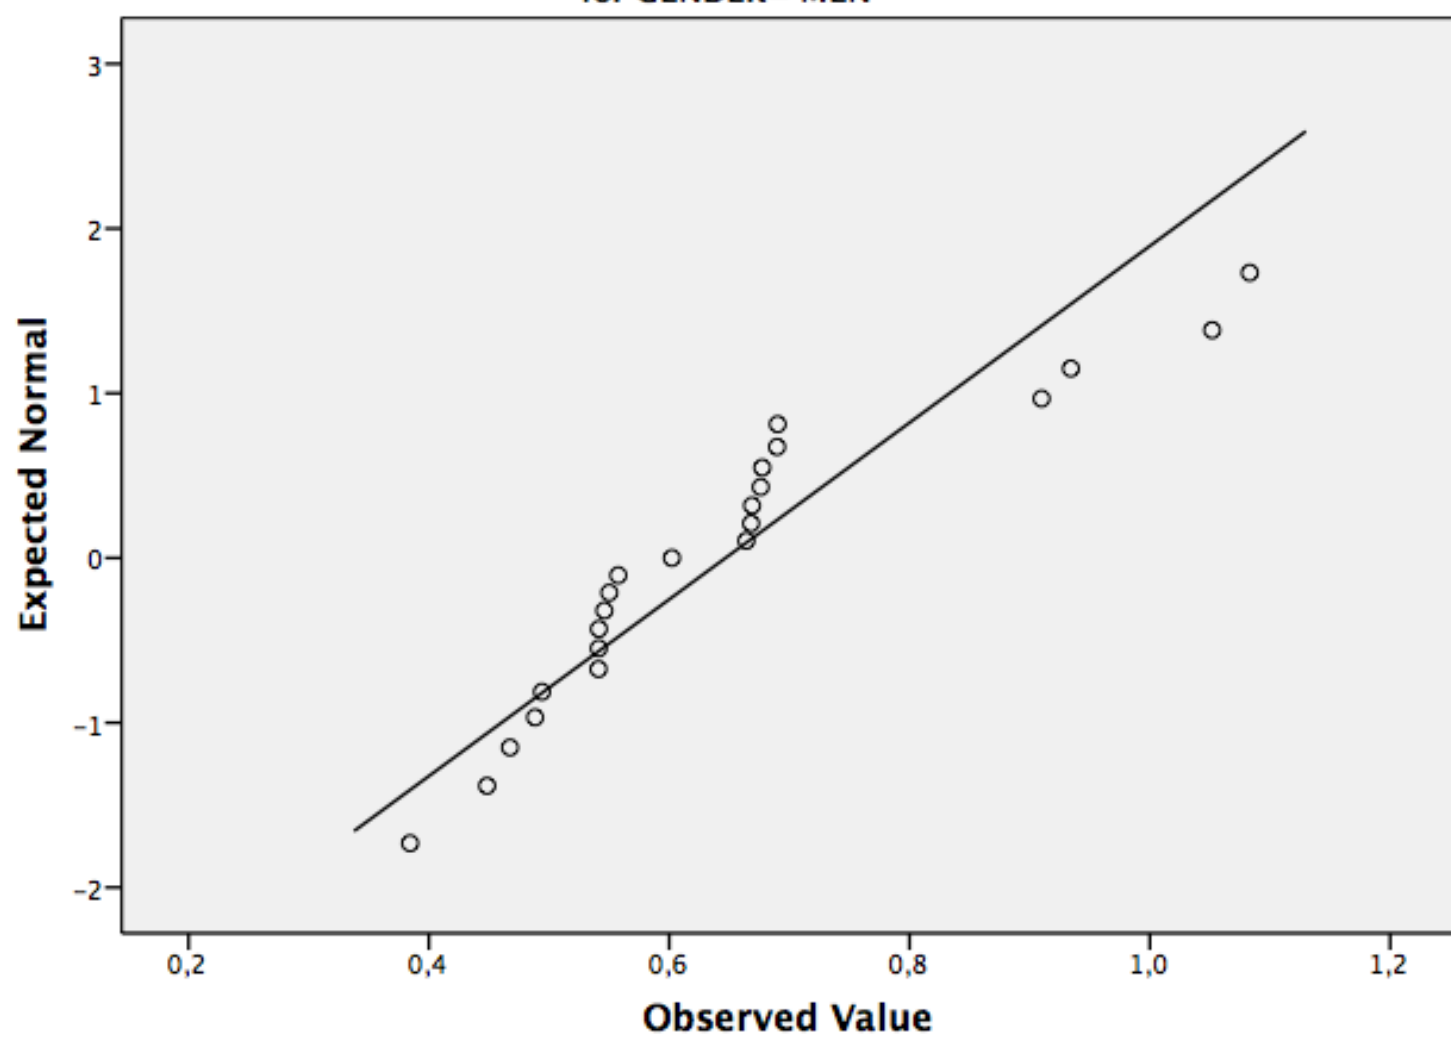

Normal Q-Q Plots

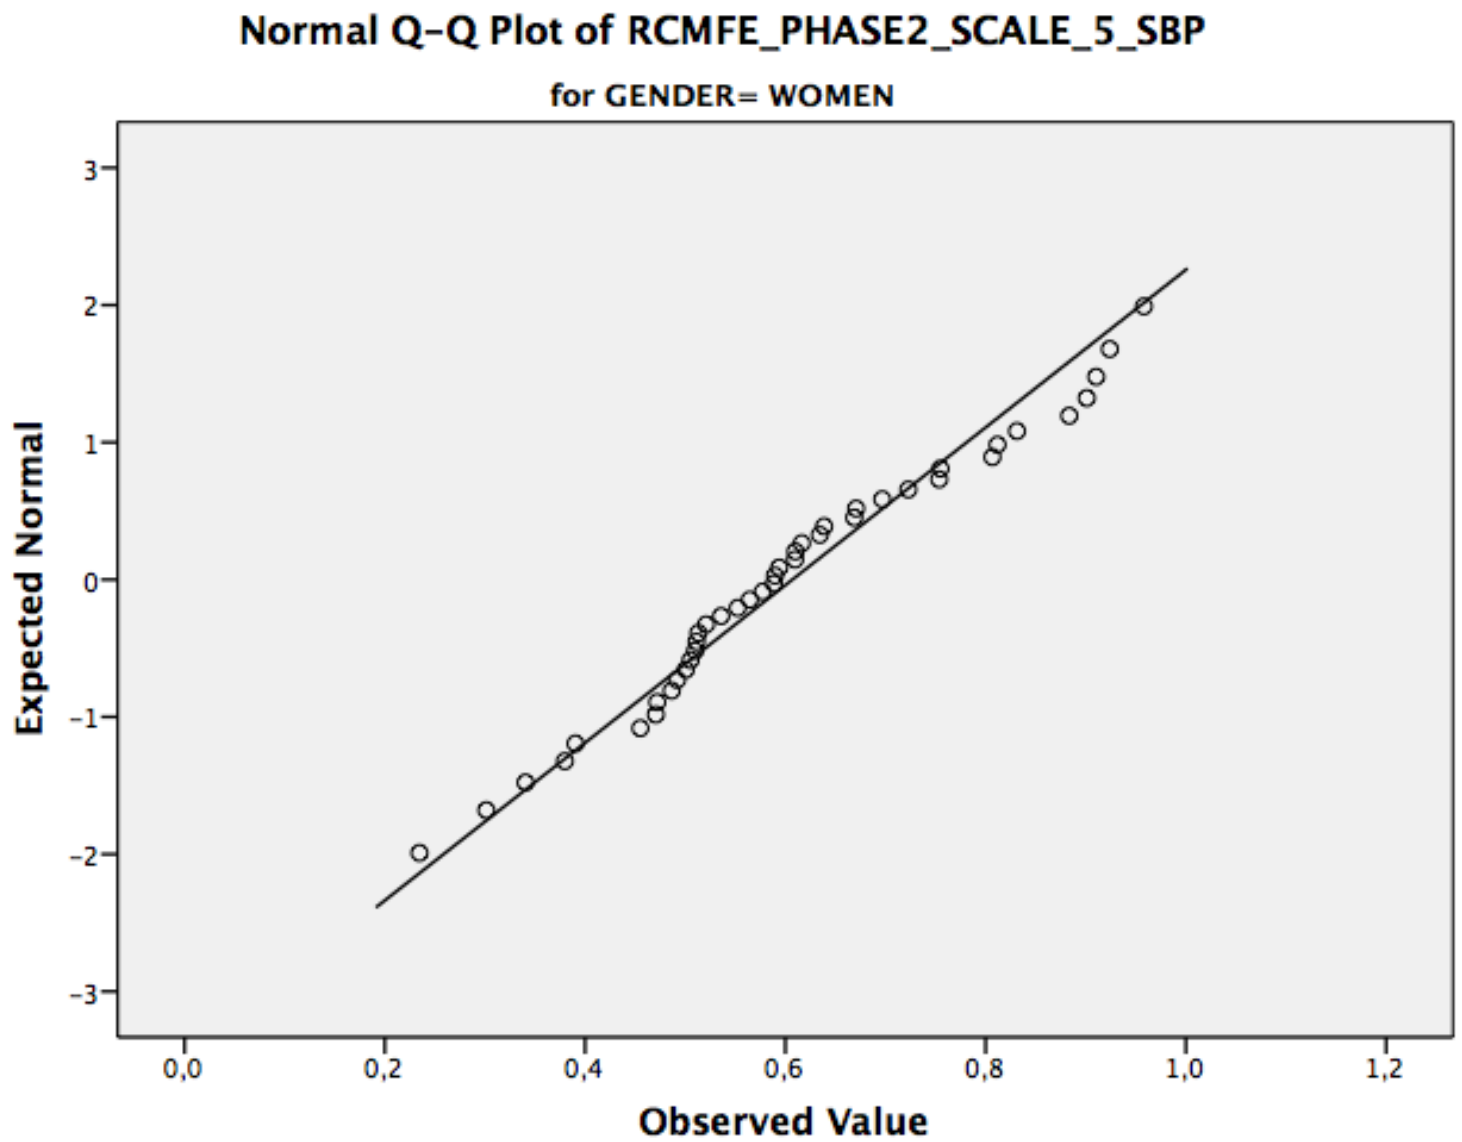

# Normal Q-Q Plot of RCMFE\_PHASE2\_SCALE\_5\_SBP

for GENDER= MEN

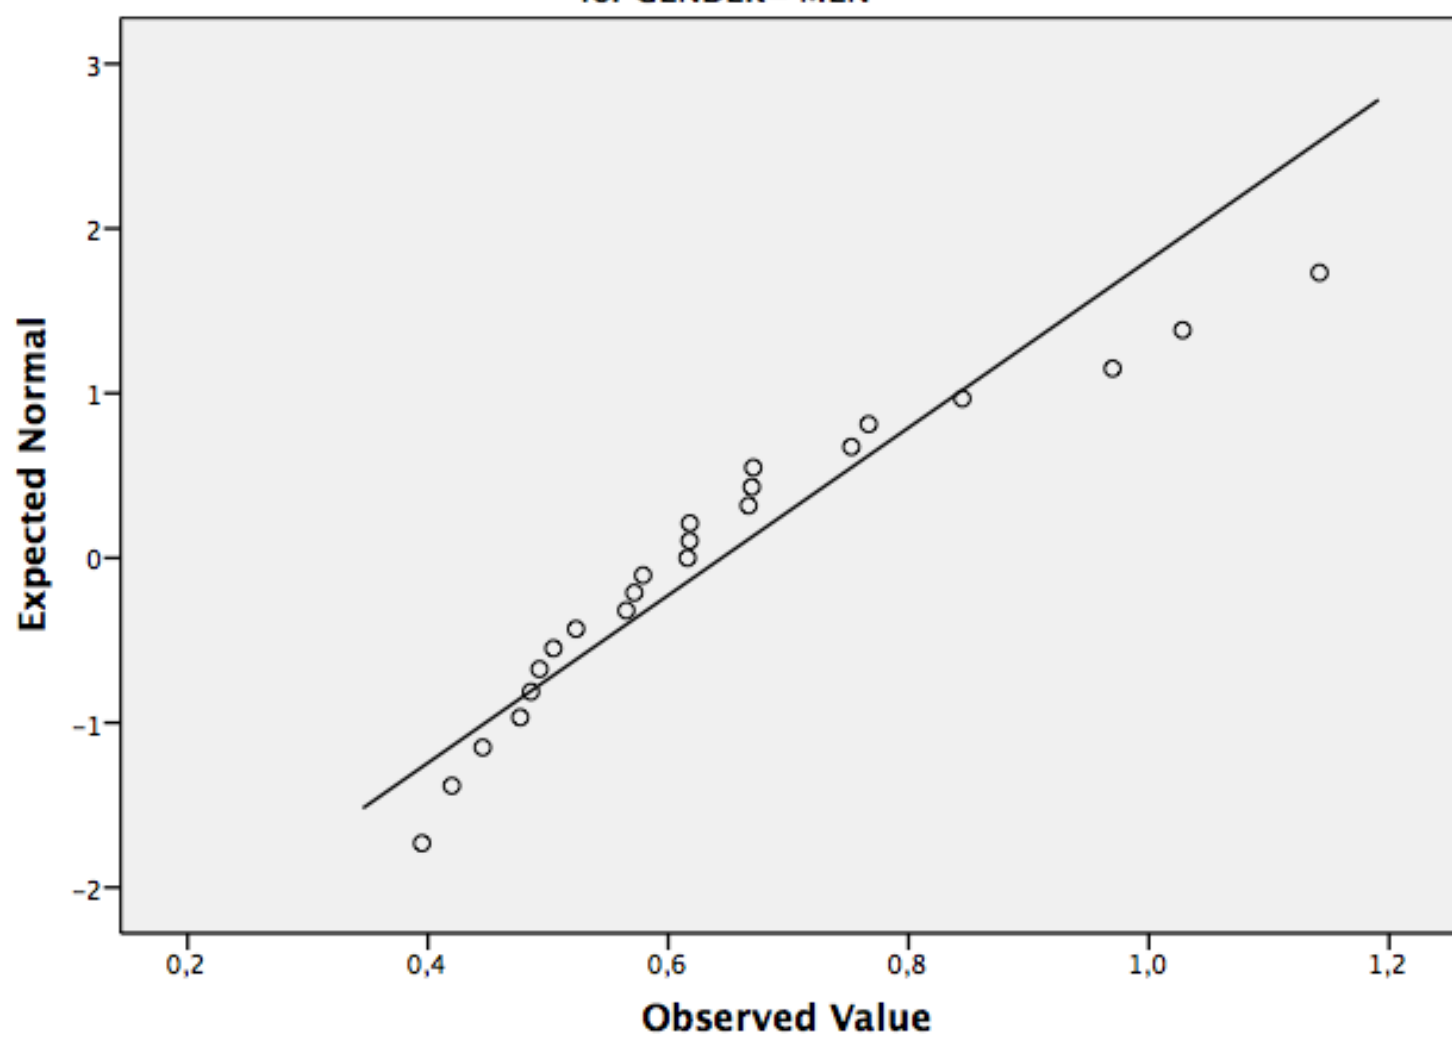

Normal Q-Q Plots

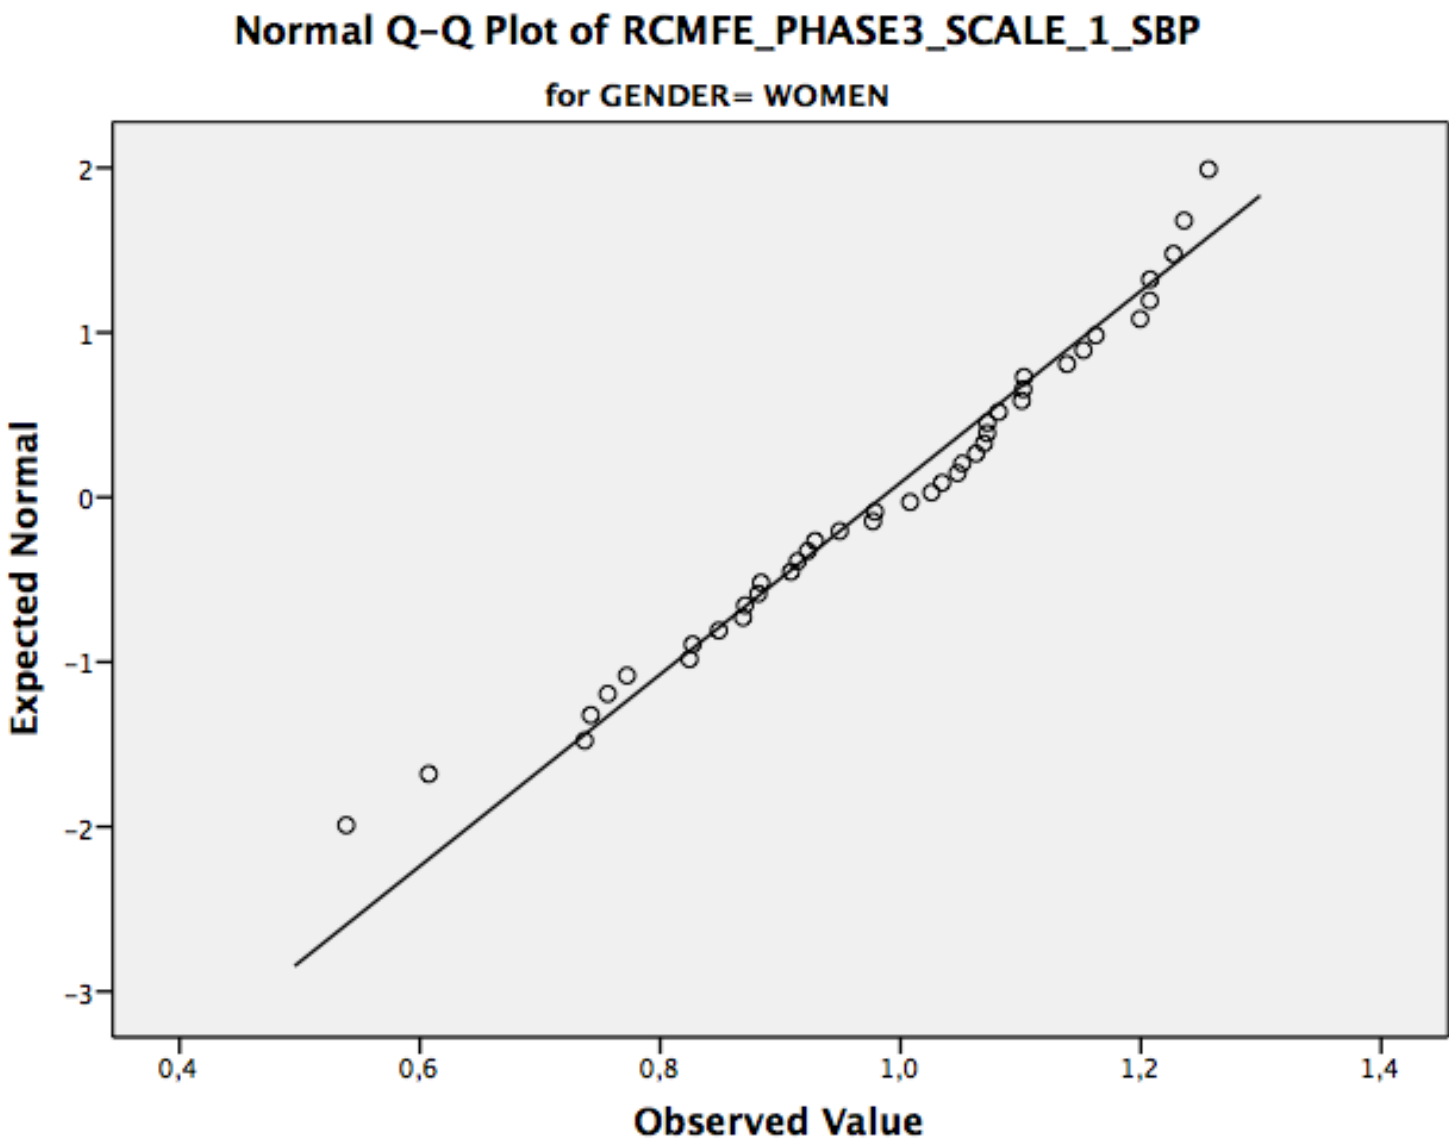

# Normal Q-Q Plot of RCMFE\_PHASE3\_SCALE\_1\_SBP

for GENDER= MEN

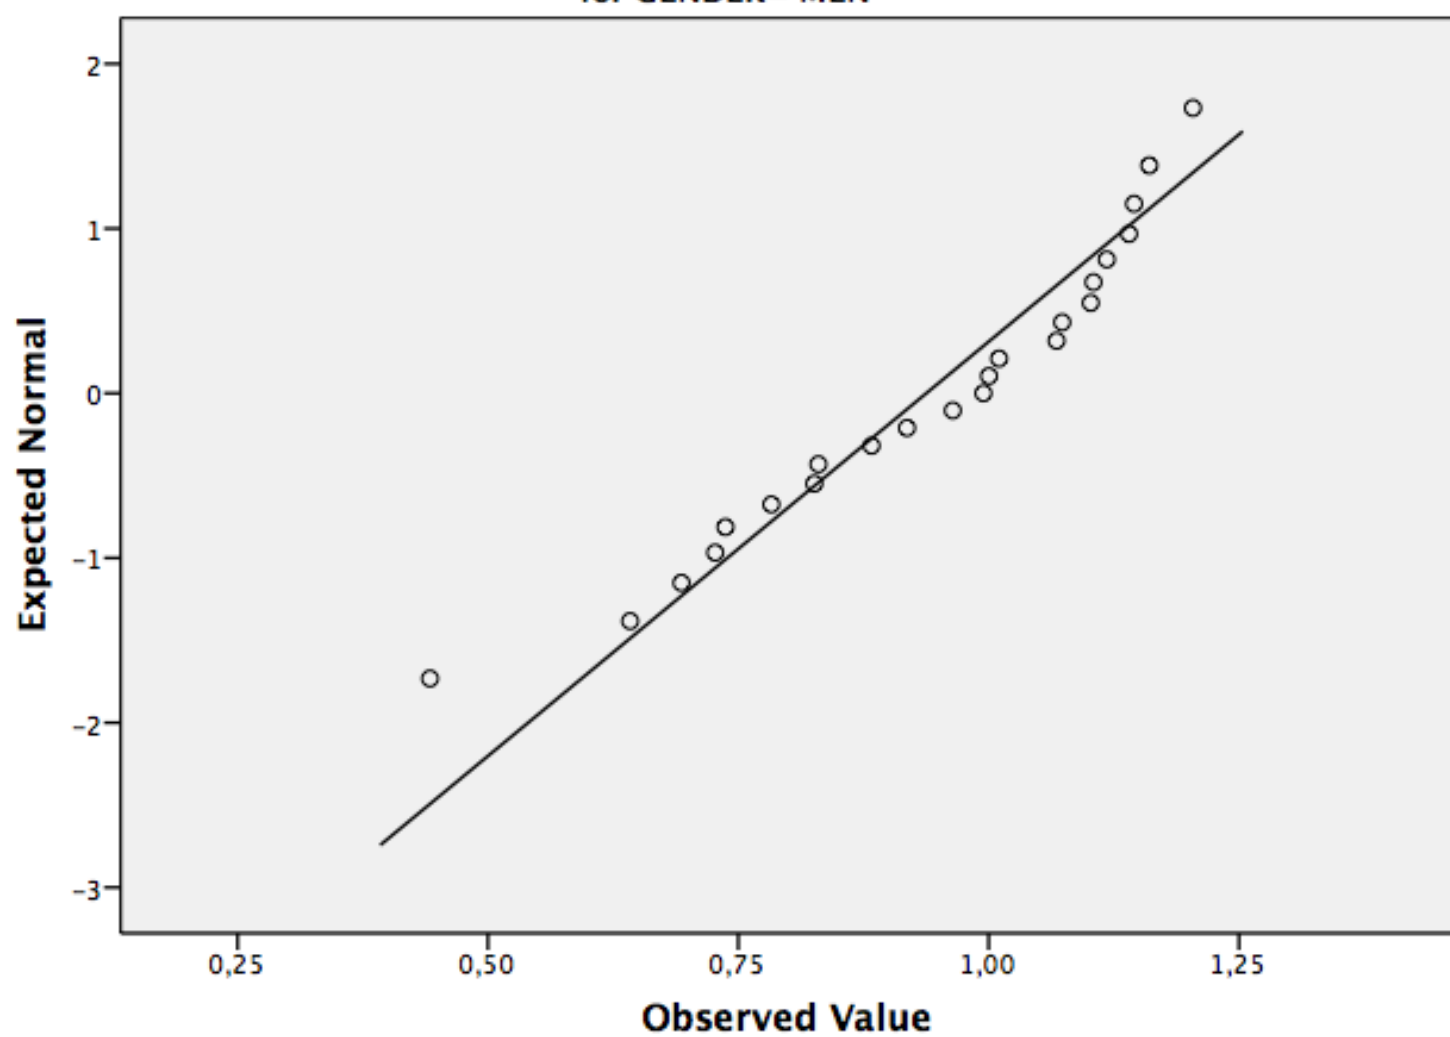

Normal Q-Q Plots

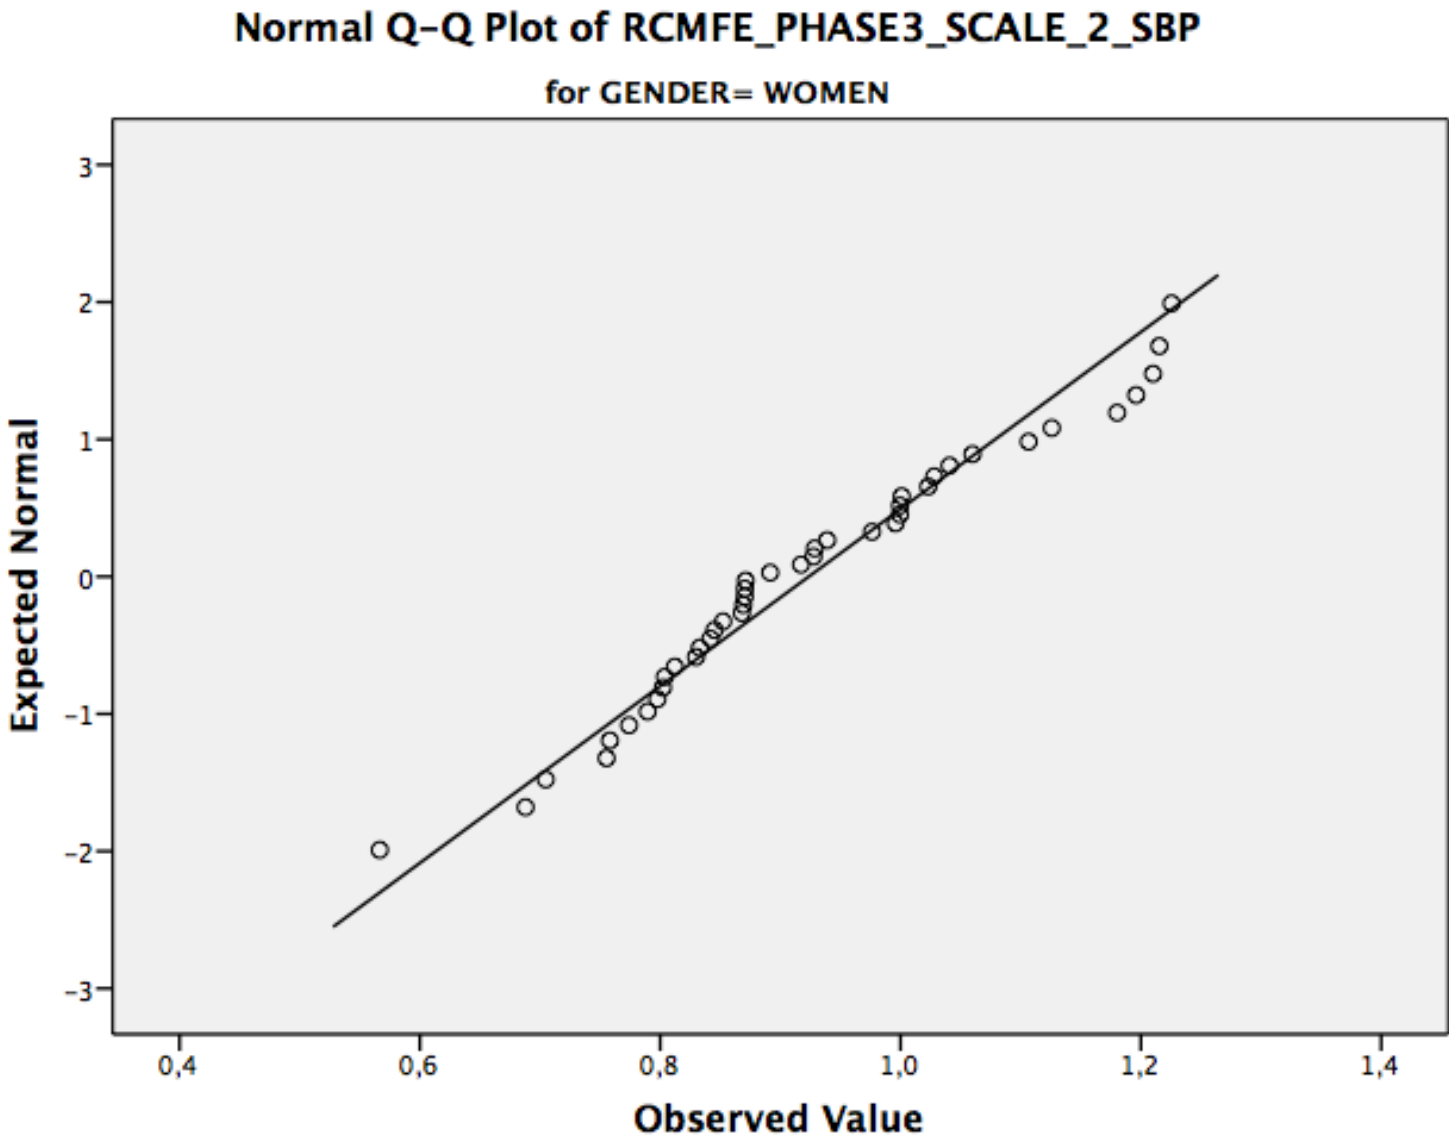

# Normal Q-Q Plot of RCMFE\_PHASE3\_SCALE\_2\_SBP

for GENDER= MEN

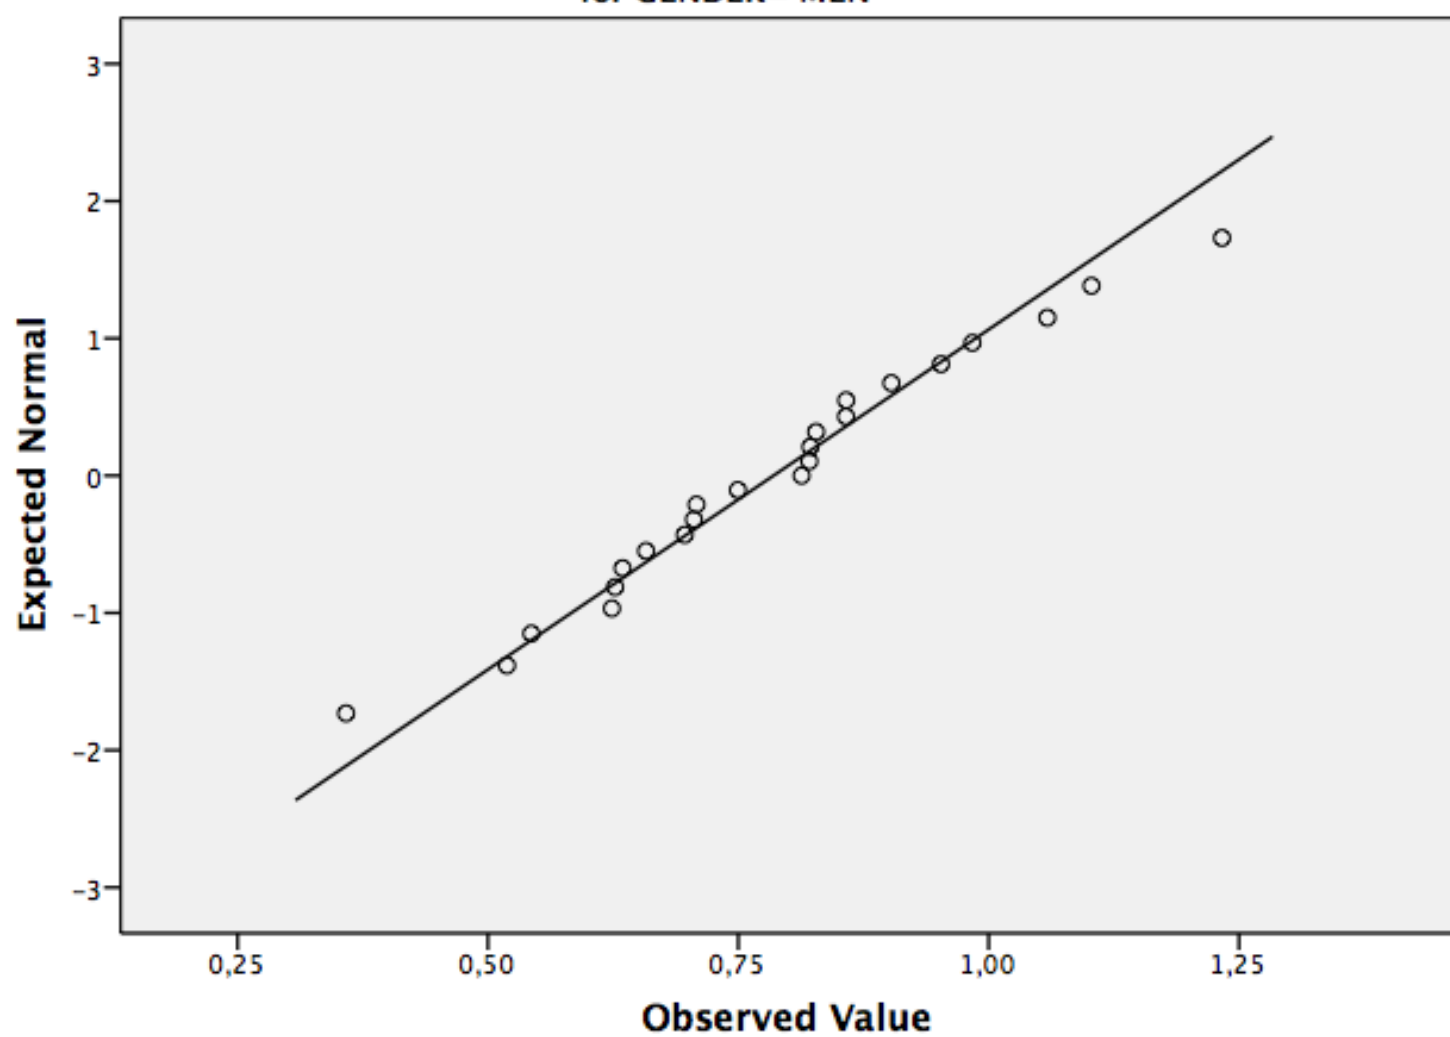

Normal Q-Q Plots

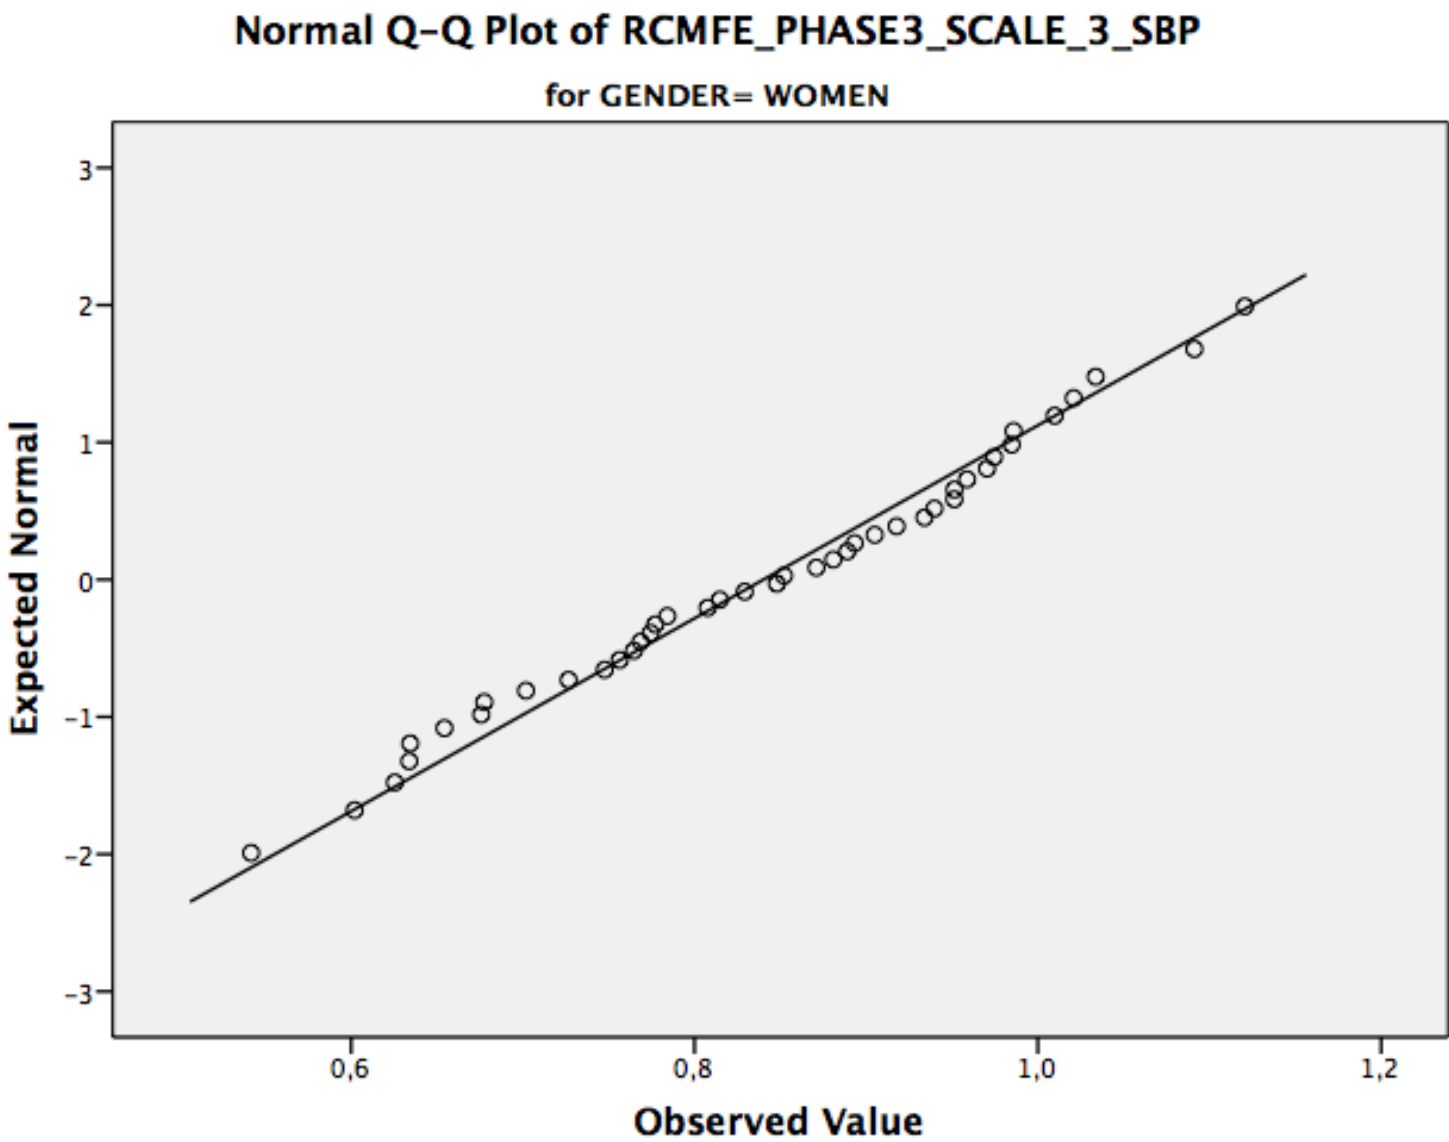



# Normal Q-Q Plot of RCMFE\_PHASE3\_SCALE\_3\_SBP

for GENDER= MEN

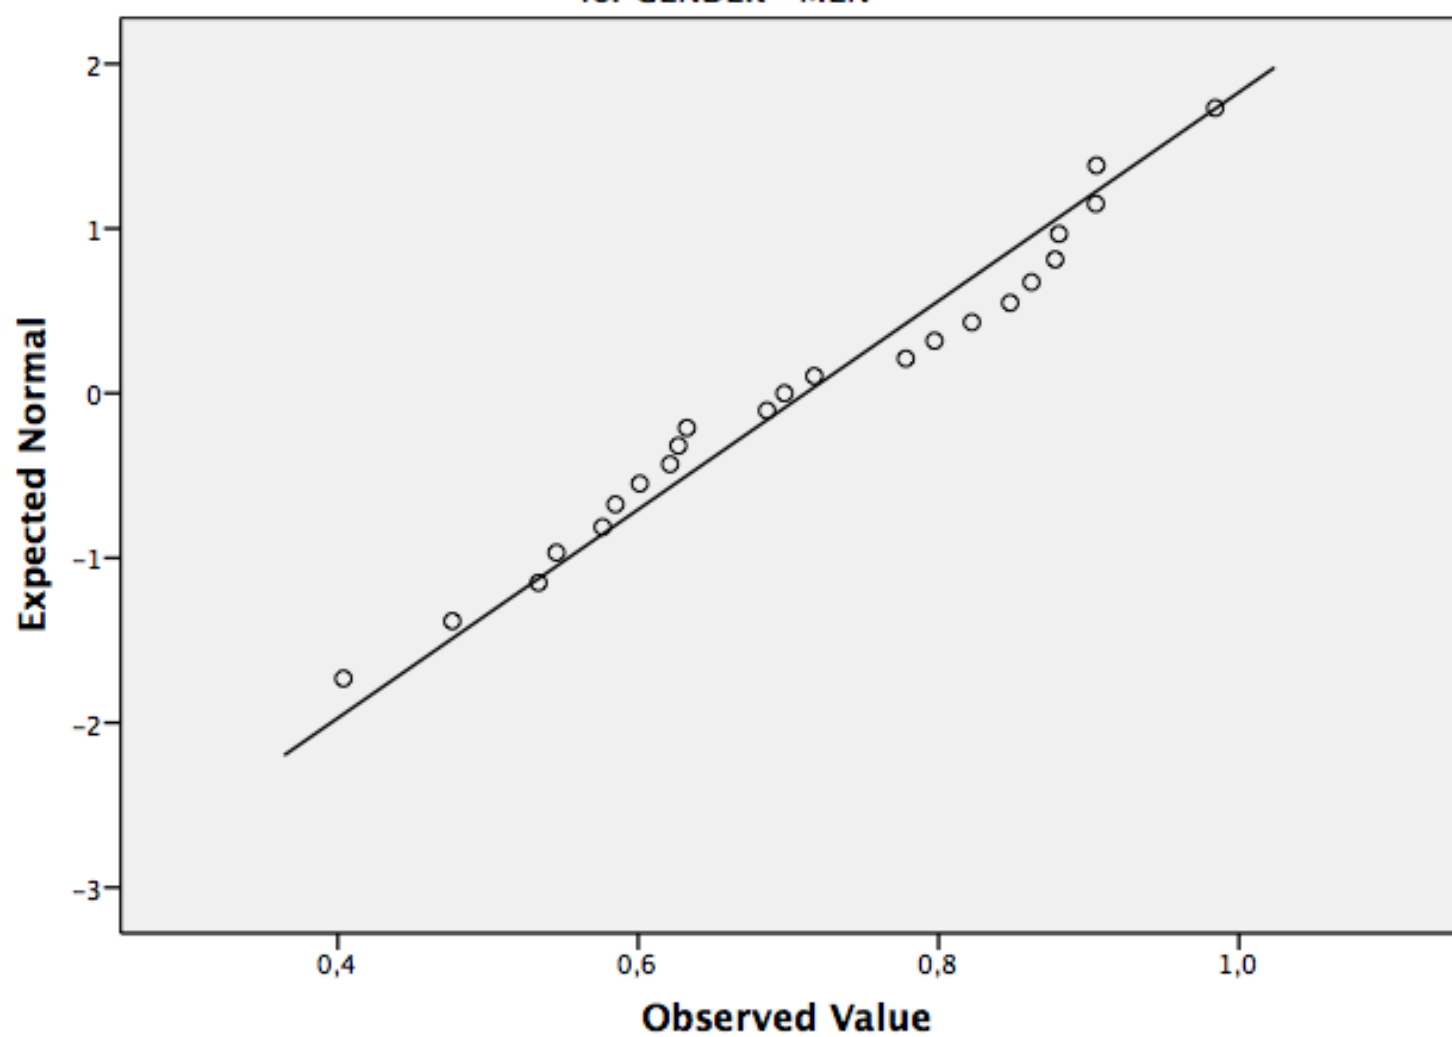

Normal Q-Q Plots

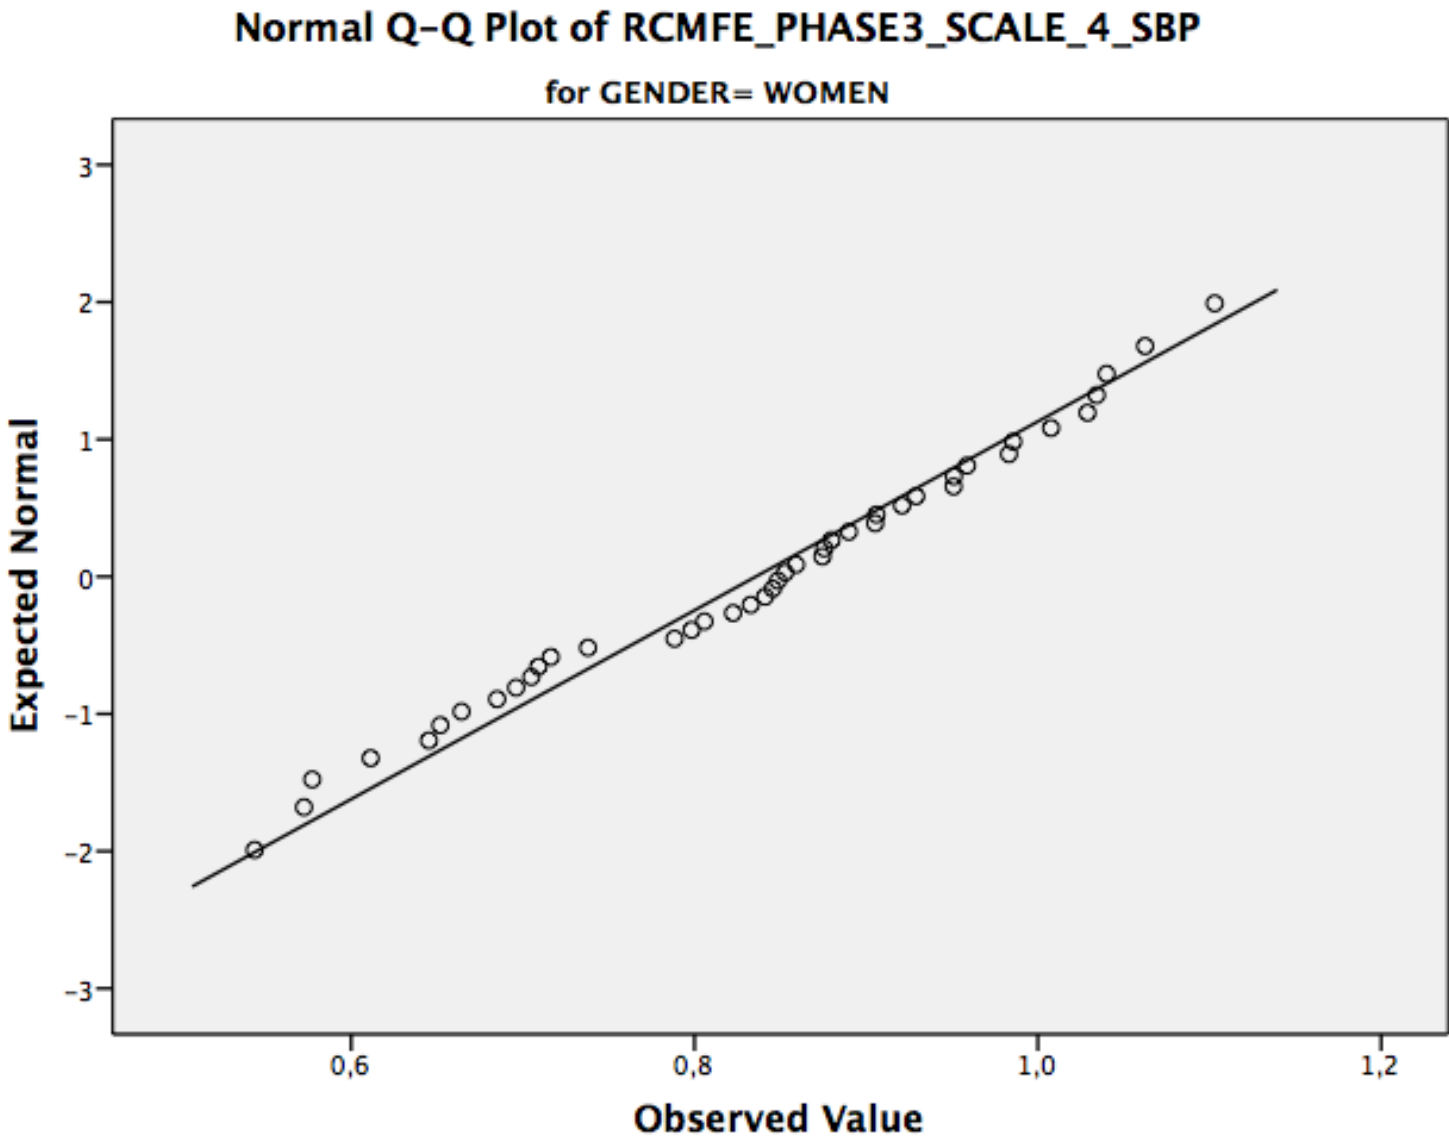

# Normal Q-Q Plot of RCMFE\_PHASE3\_SCALE\_4\_SBP

for GENDER= MEN

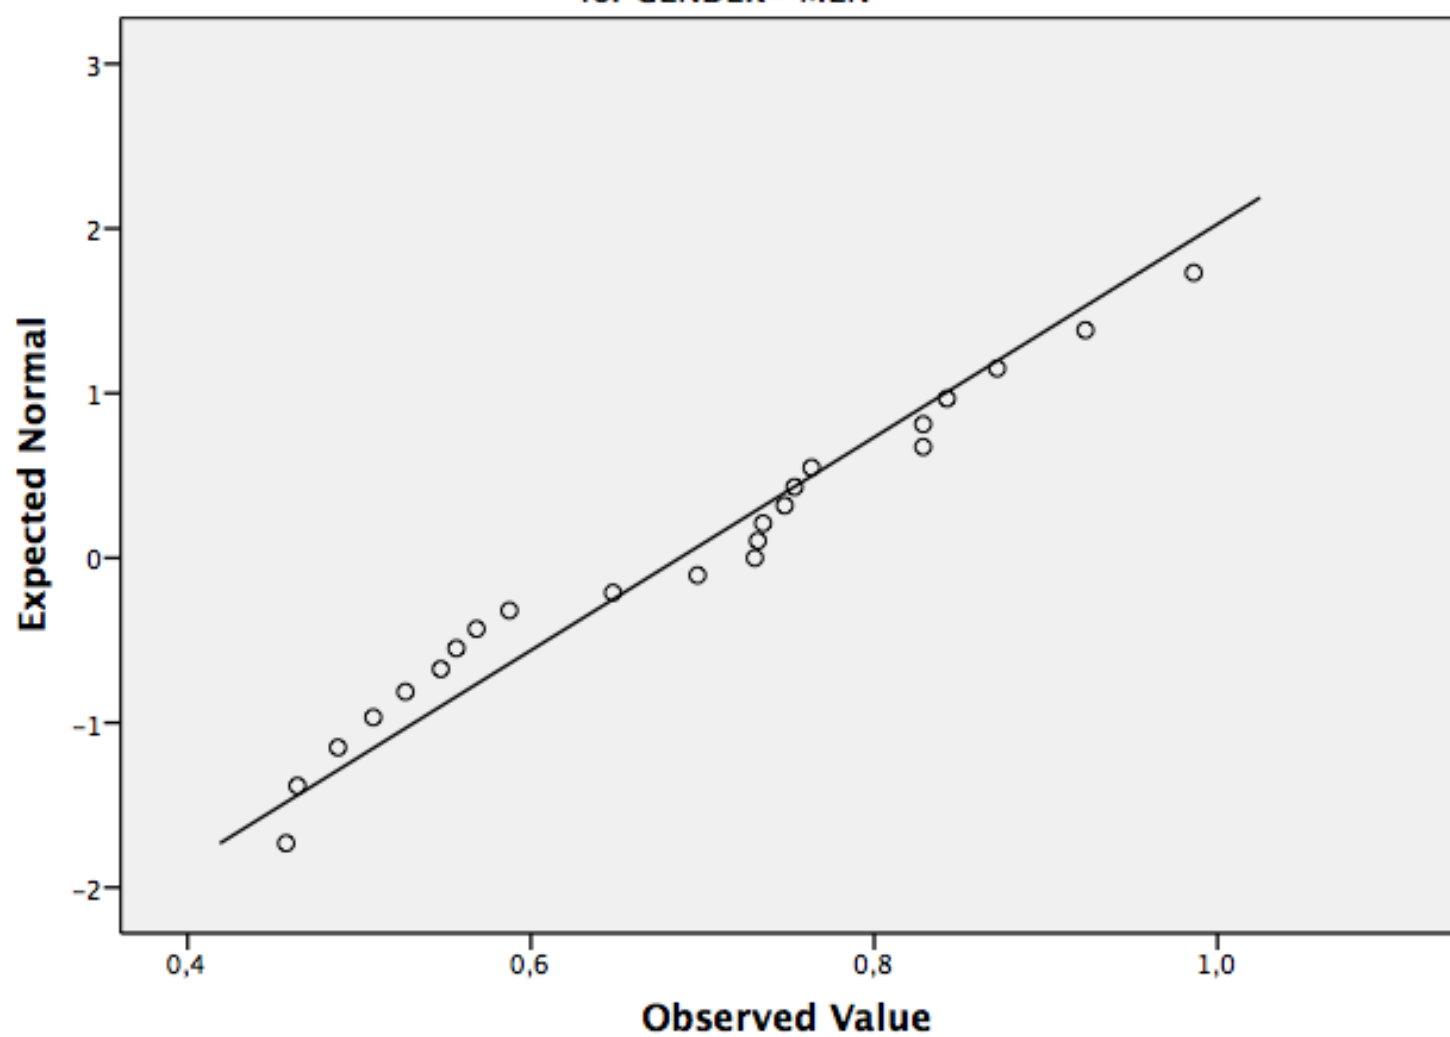

Normal Q-Q Plots

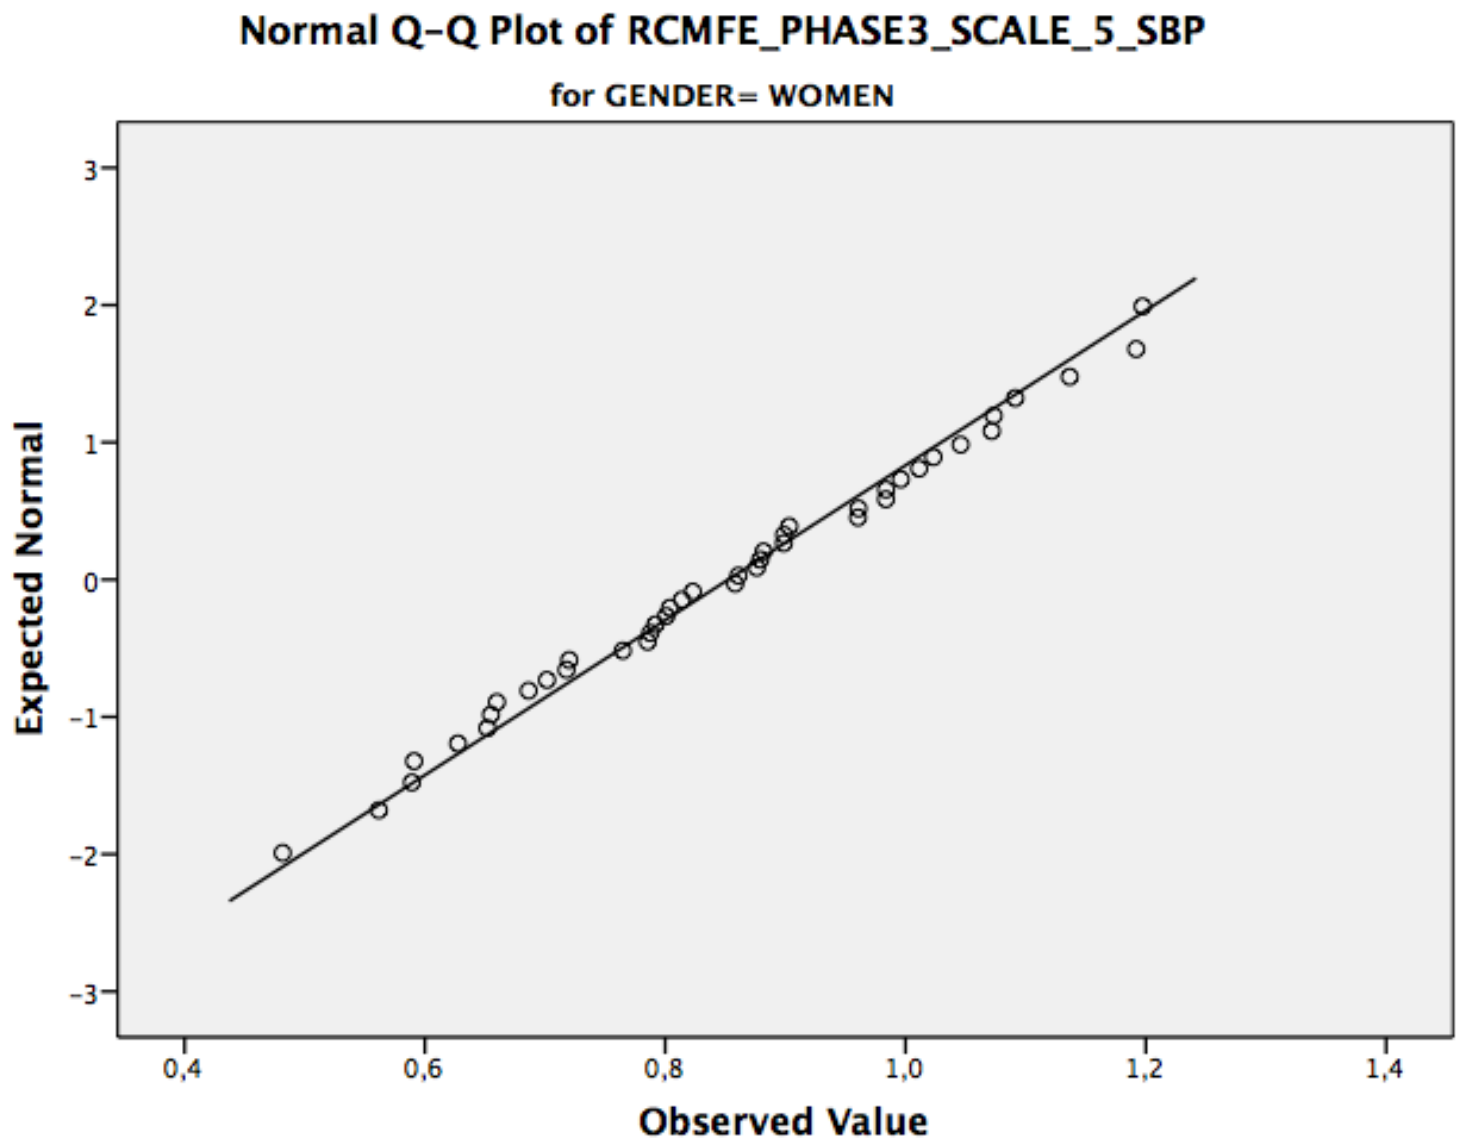

# Normal Q-Q Plot of RCMFE\_PHASE3\_SCALE\_5\_SBP

for GENDER= MEN

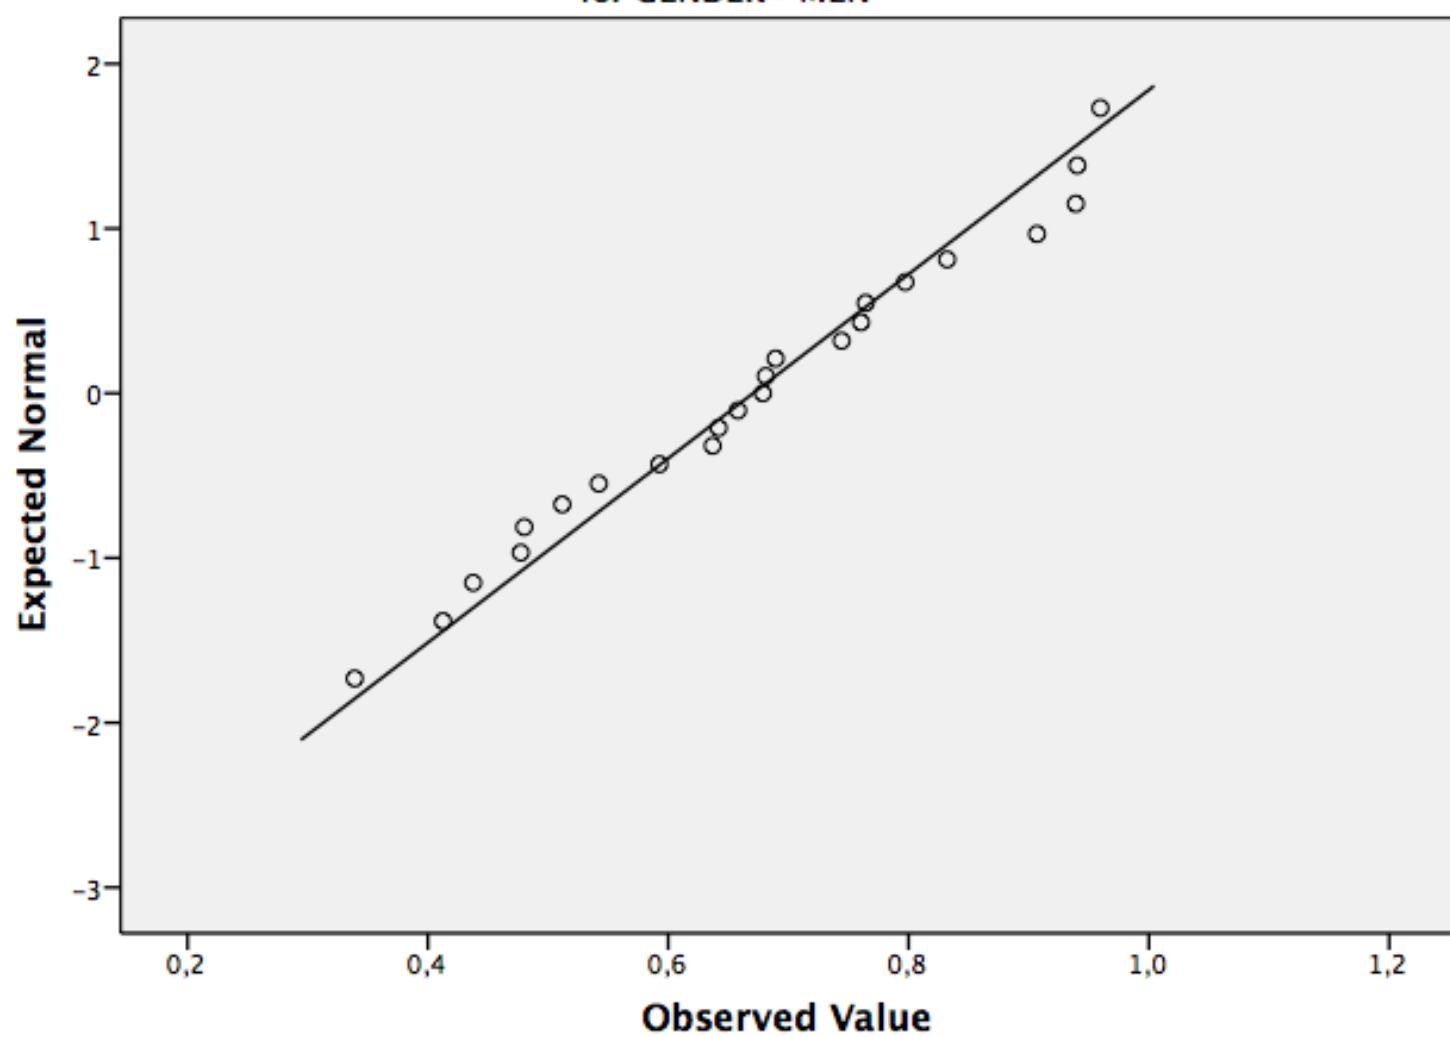

Normal Q-Q Plots

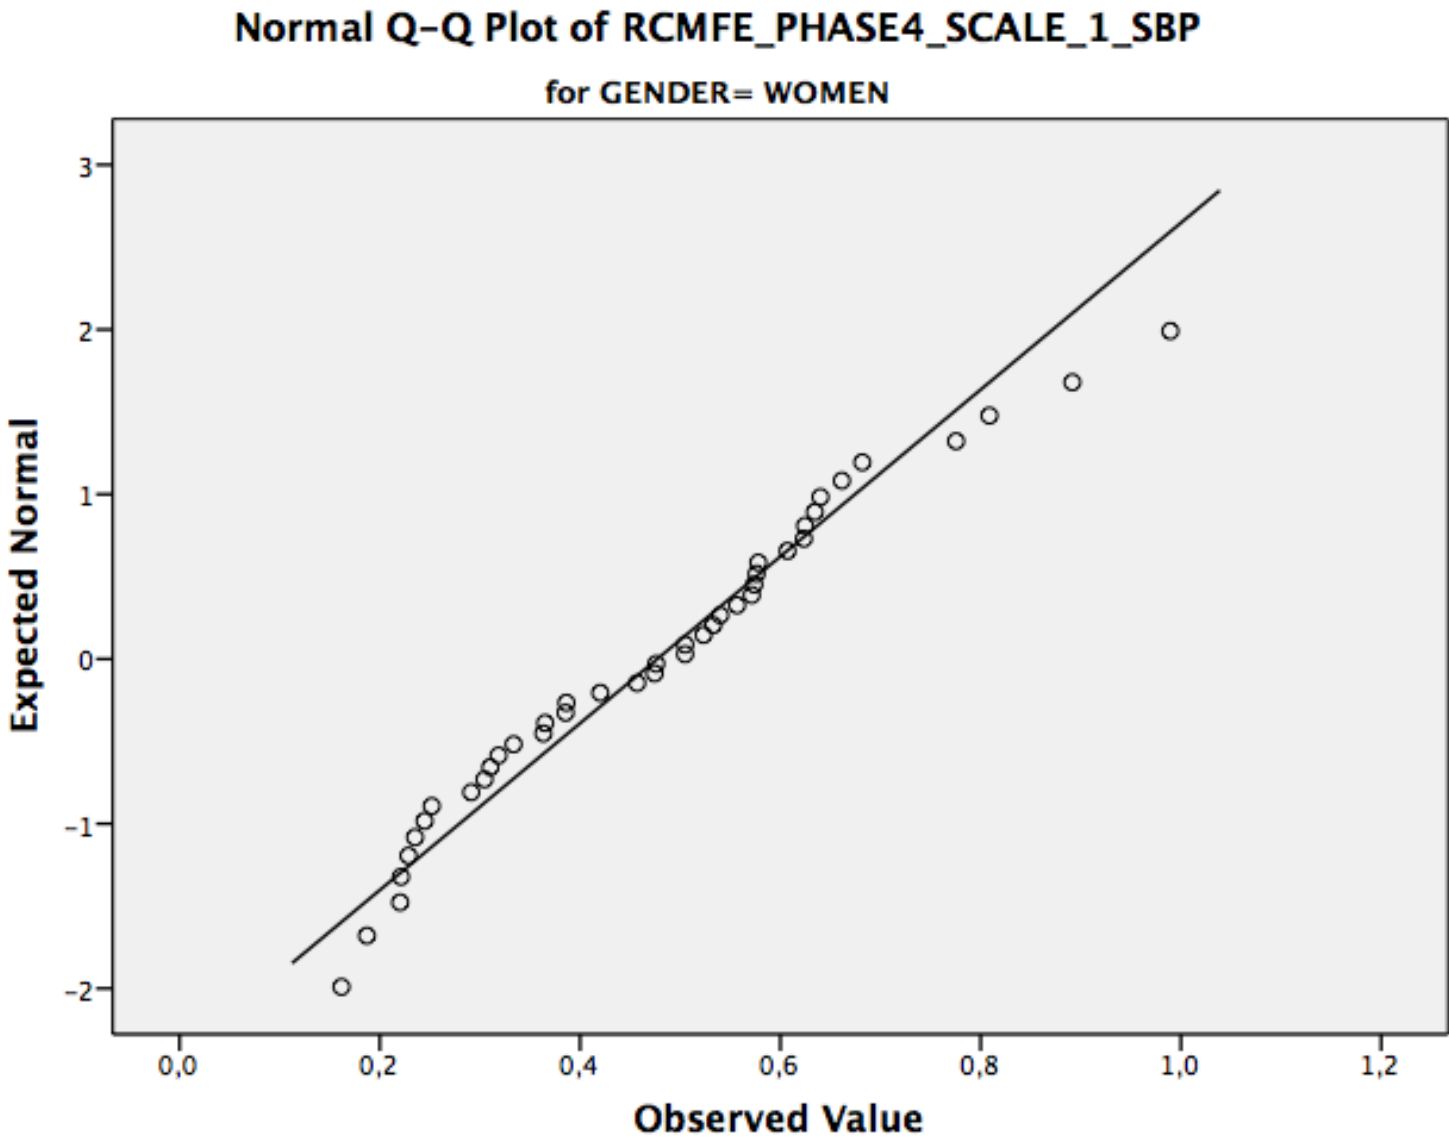

# Normal Q-Q Plot of RCMFE\_PHASE4\_SCALE\_1\_SBP

for GENDER= MEN

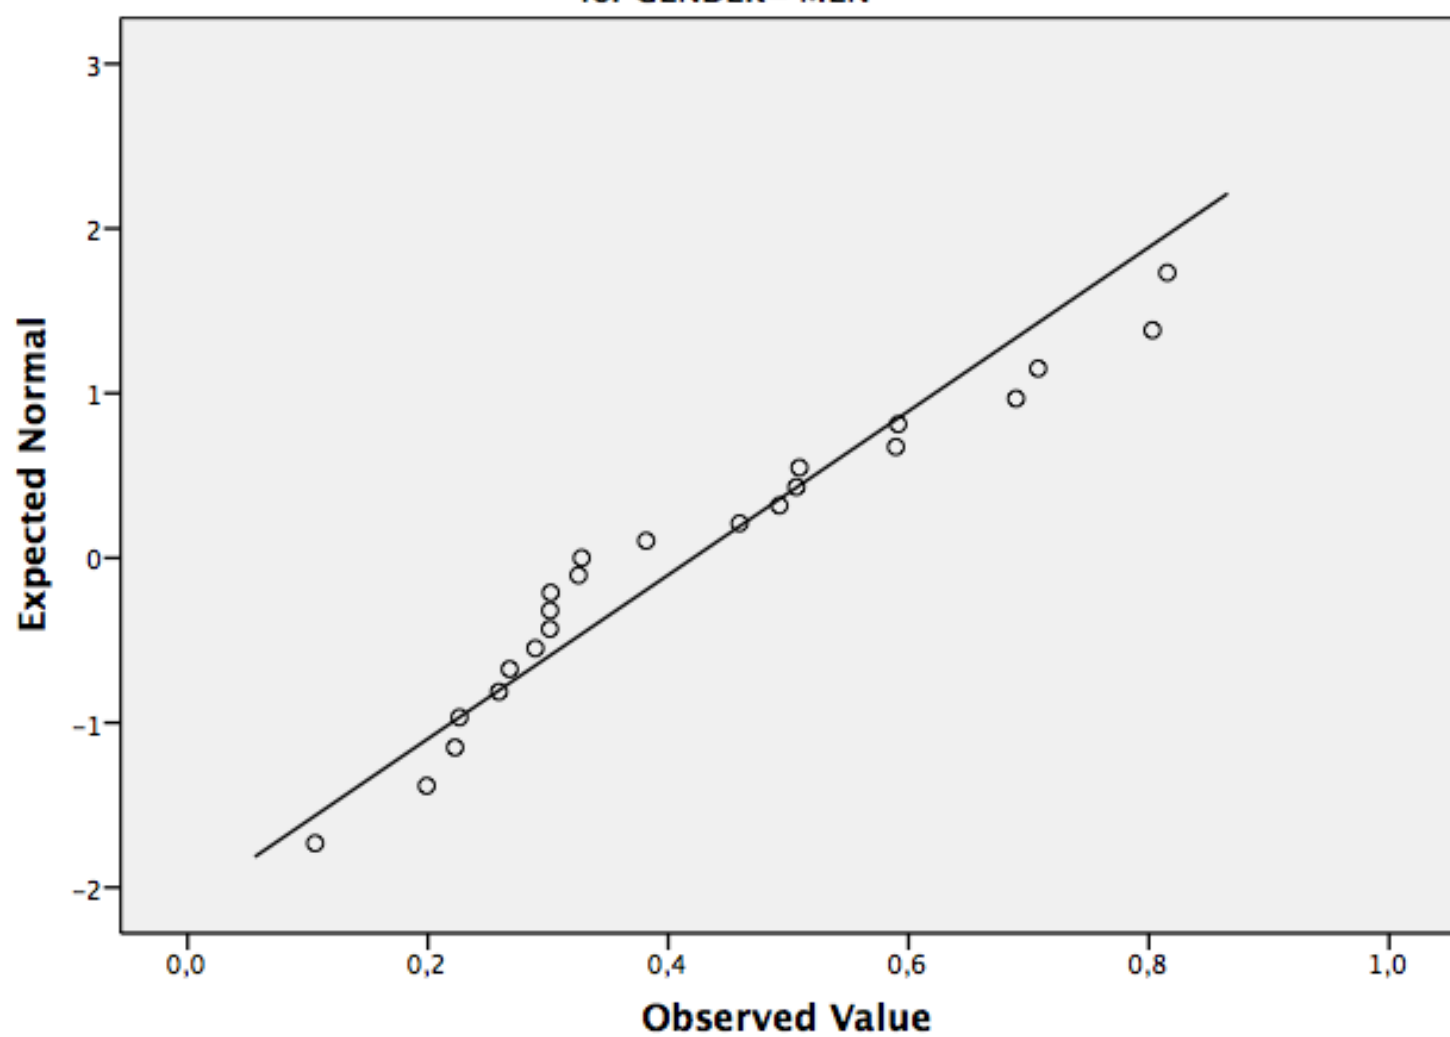

Normal Q-Q Plots

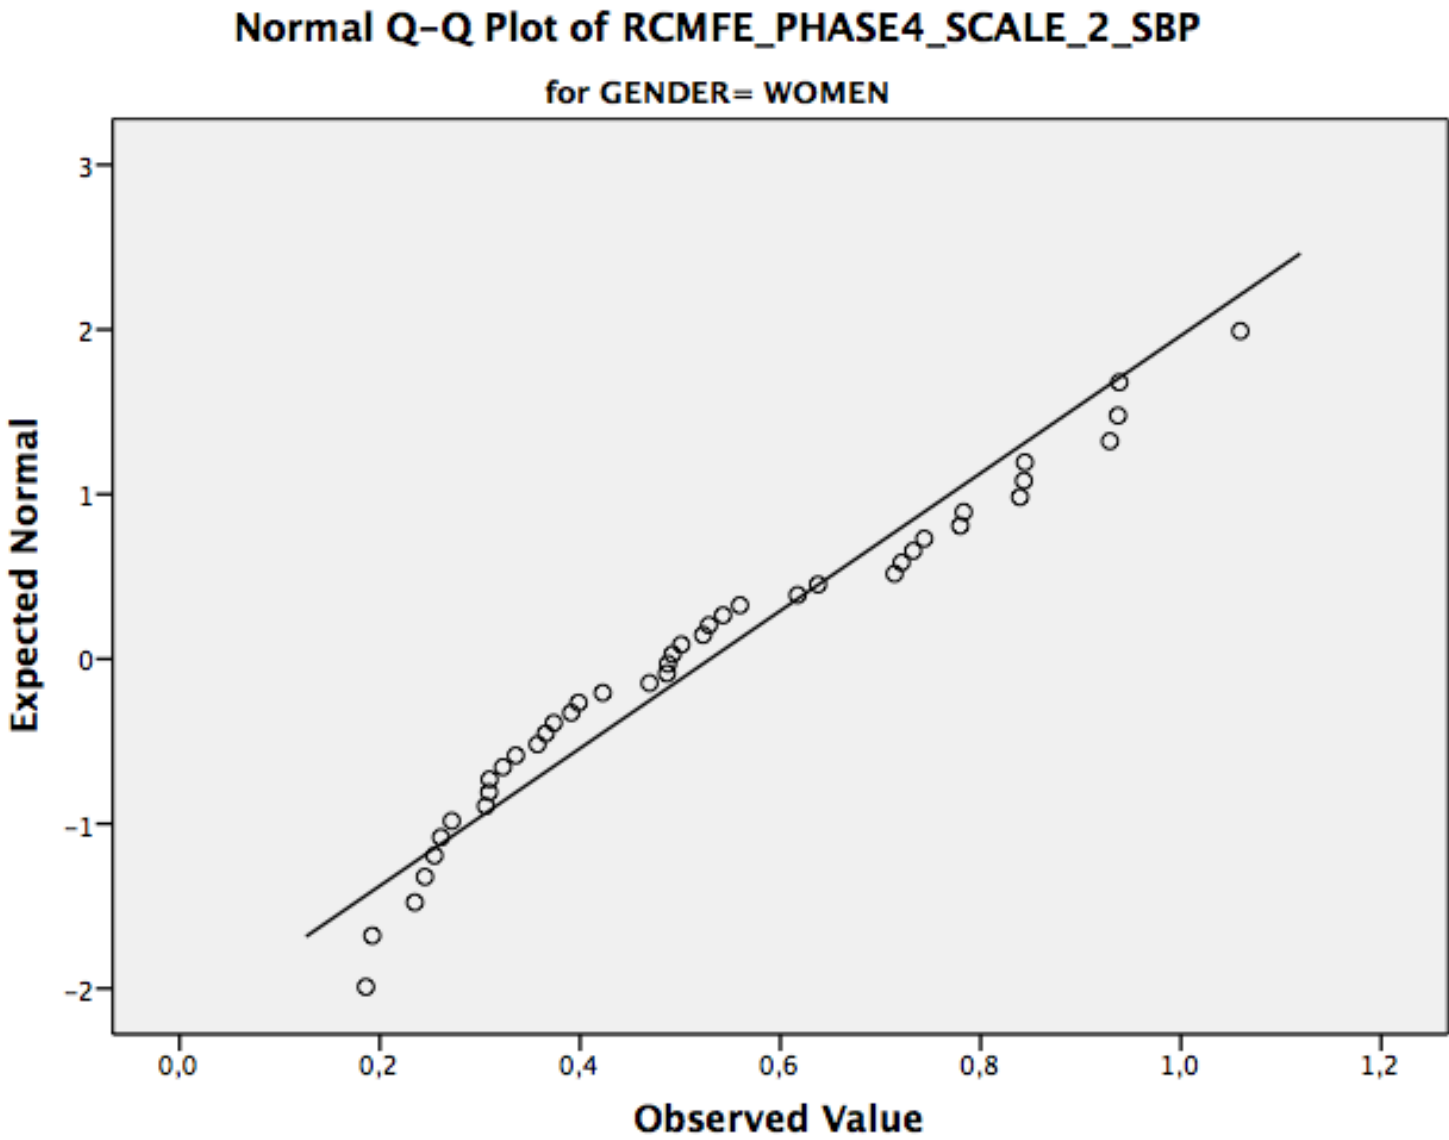



# Normal Q-Q Plot of RCMFE\_PHASE4\_SCALE\_2\_SBP

for GENDER= MEN

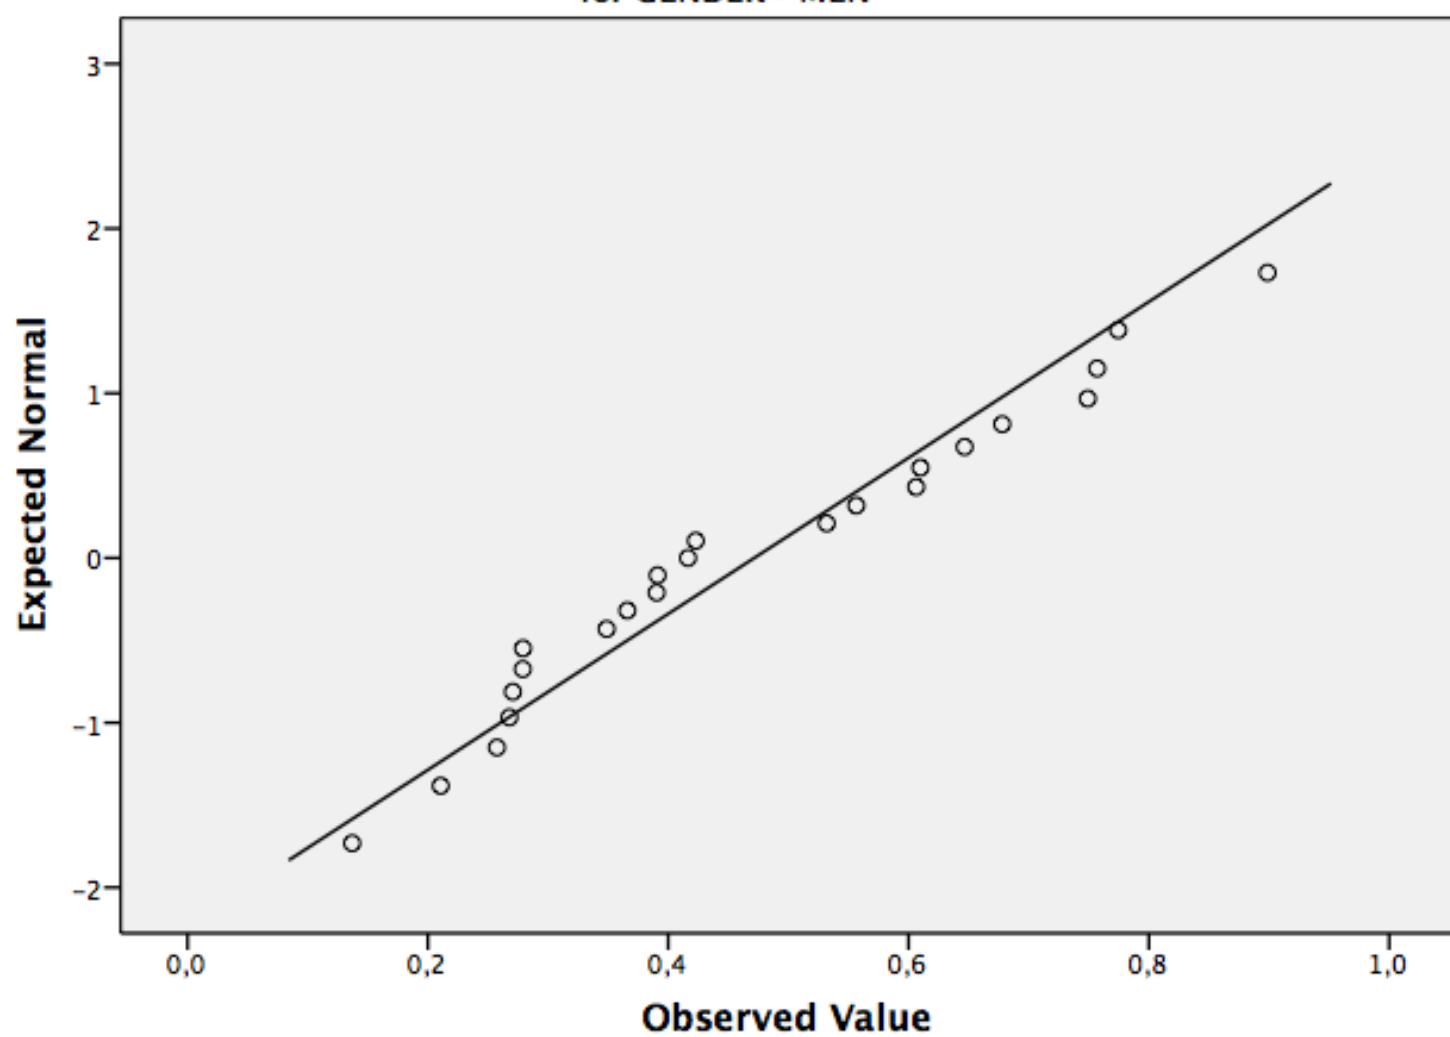

Normal Q-Q Plots

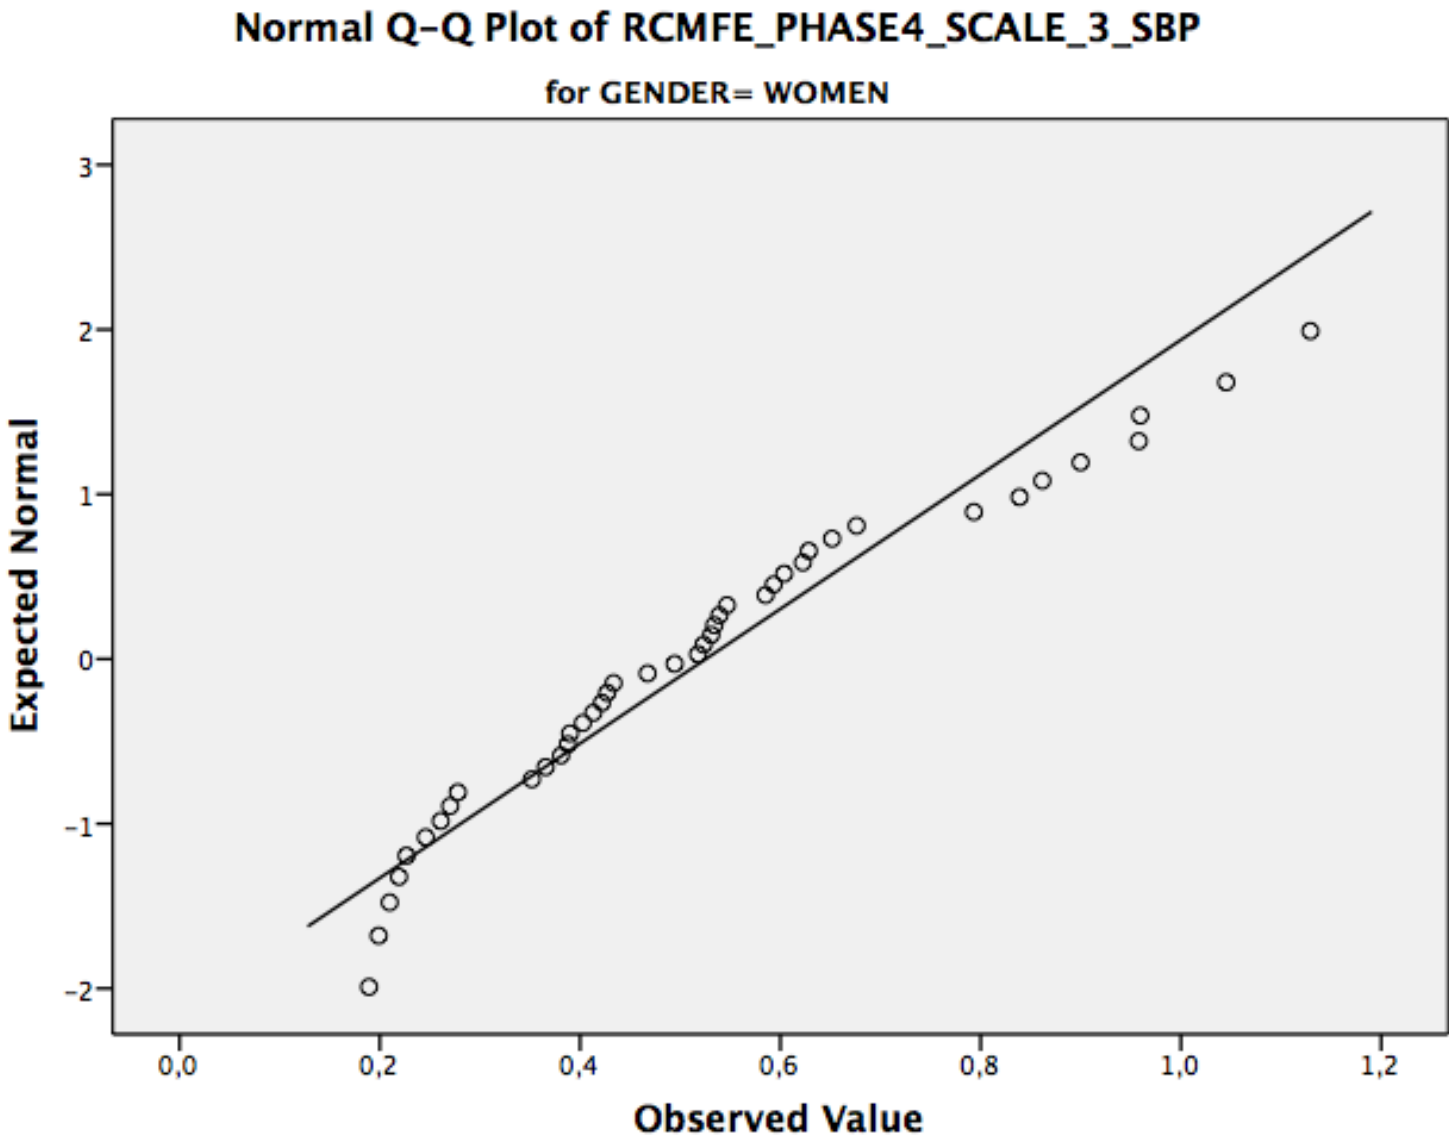

# Normal Q-Q Plot of RCMFE\_PHASE4\_SCALE\_3\_SBP

for GENDER= MEN

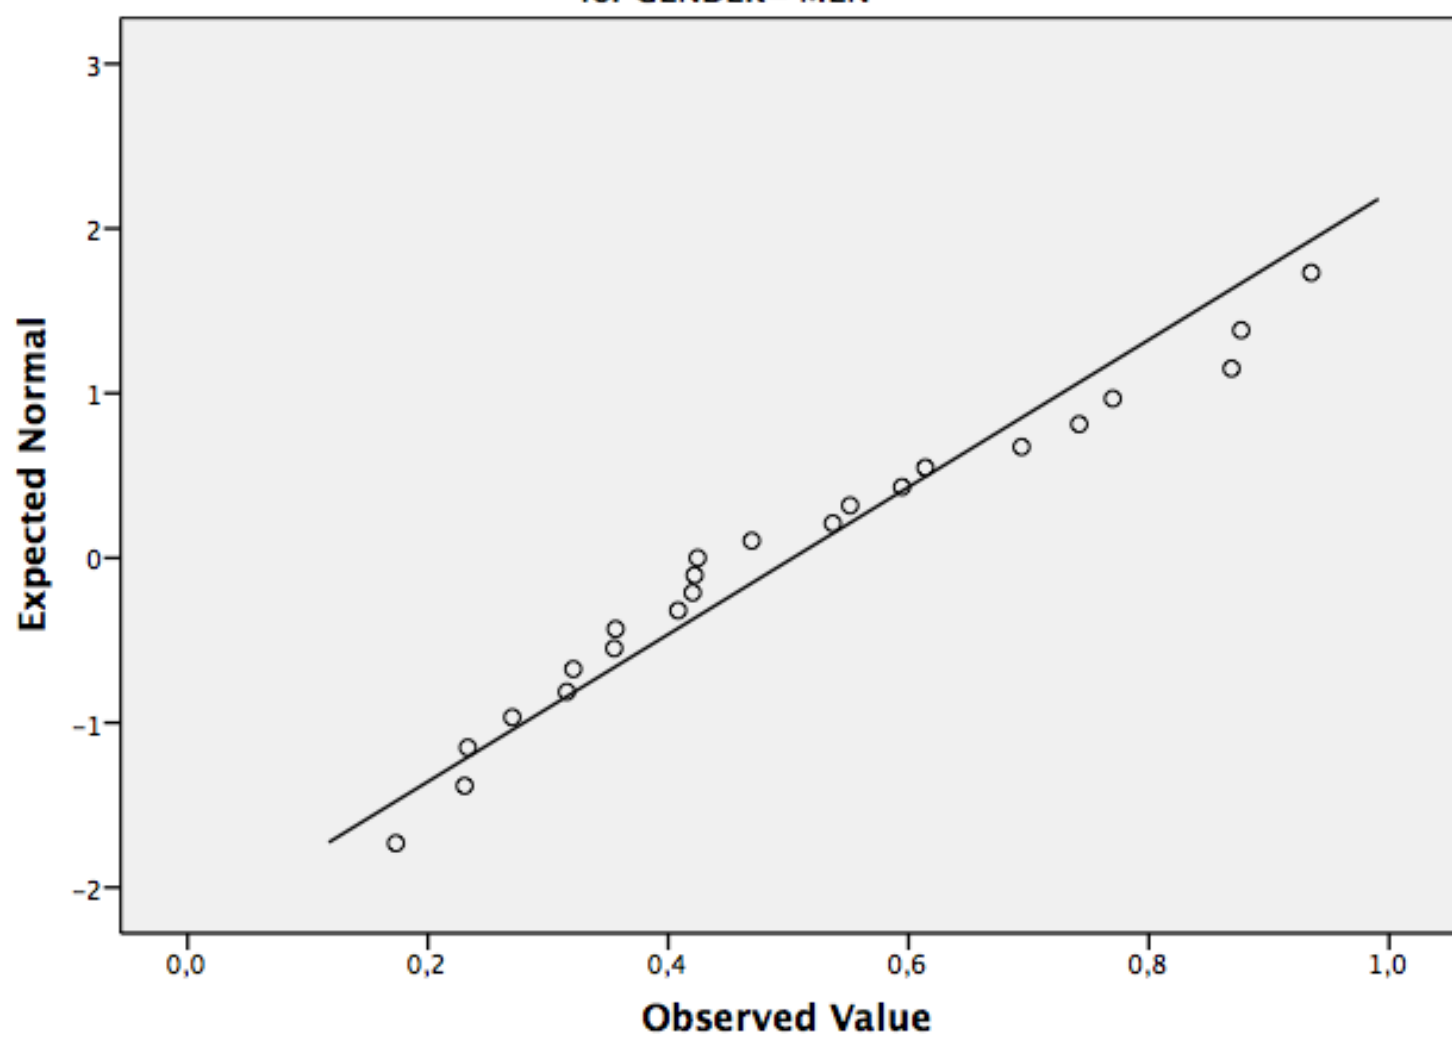

Normal Q-Q Plots

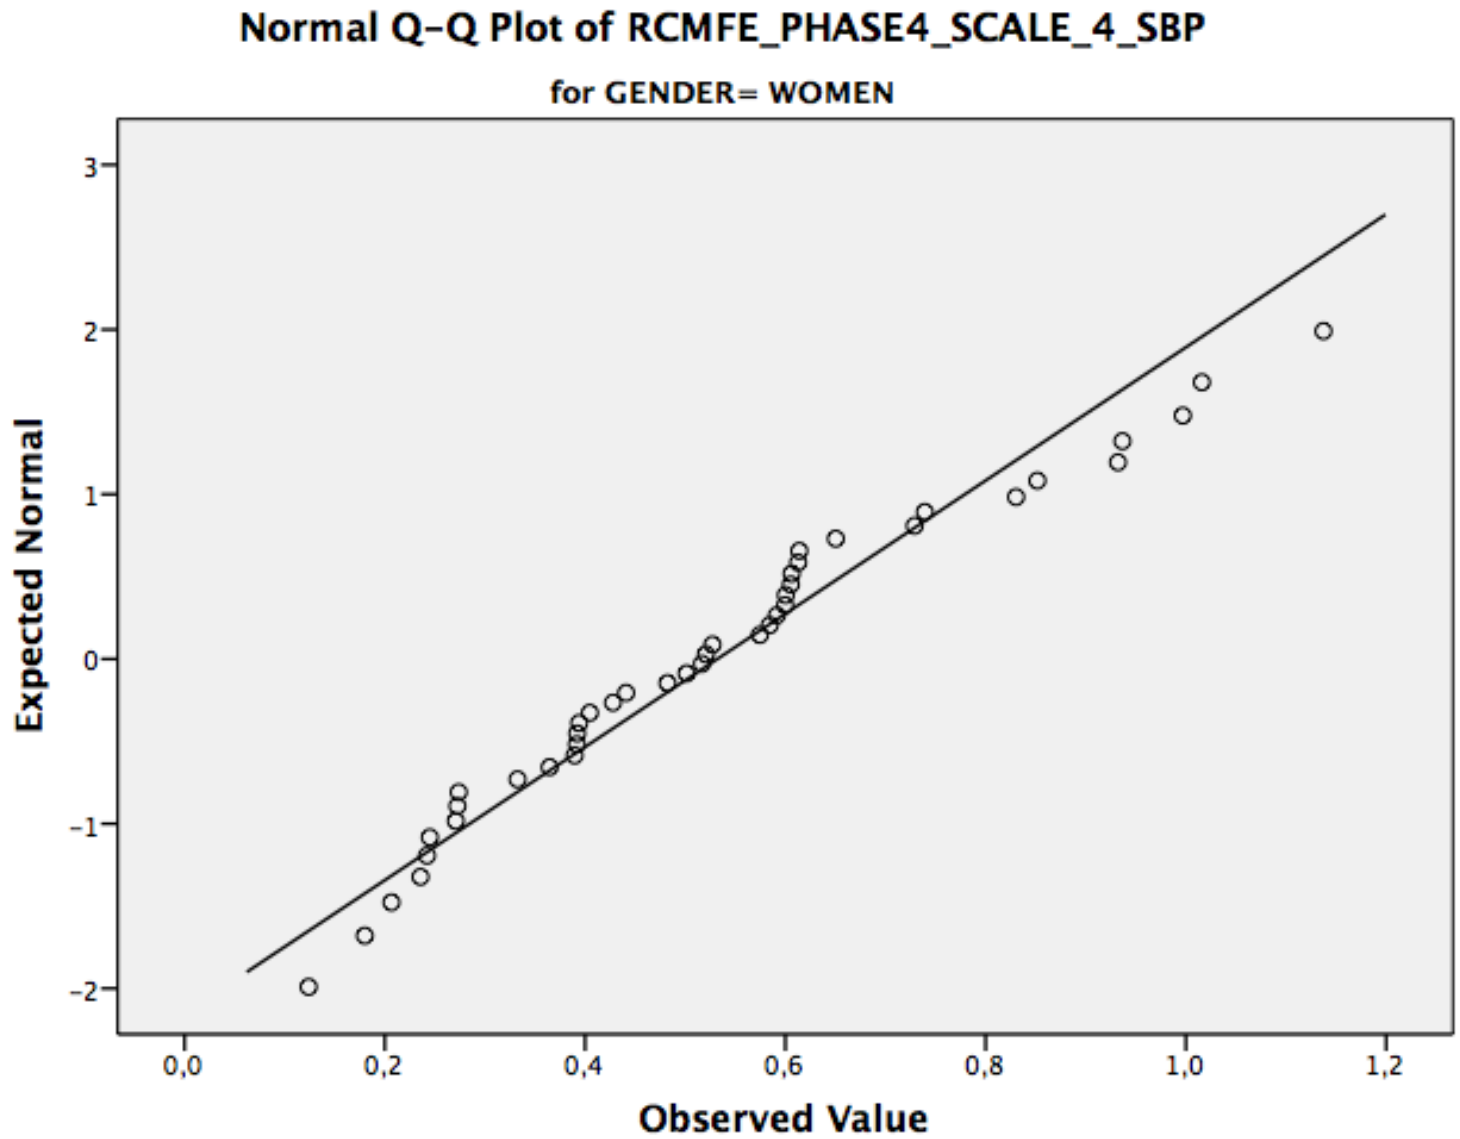

# Normal Q-Q Plot of RCMFE\_PHASE4\_SCALE\_4\_SBP

for GENDER= MEN

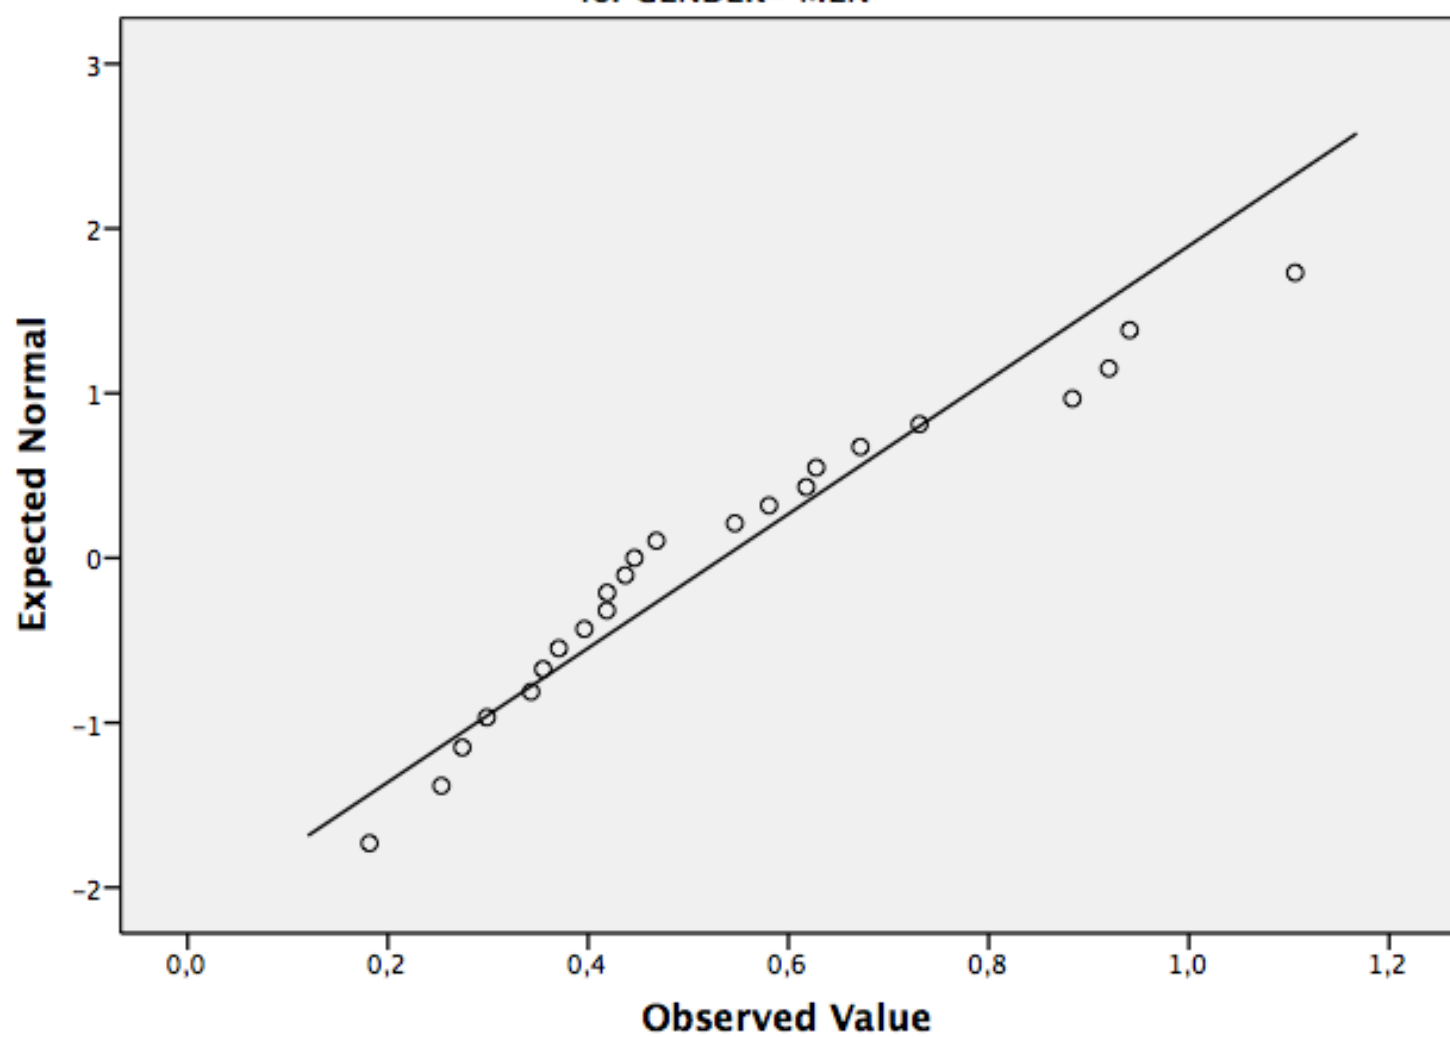

## Normal Q-Q Plots

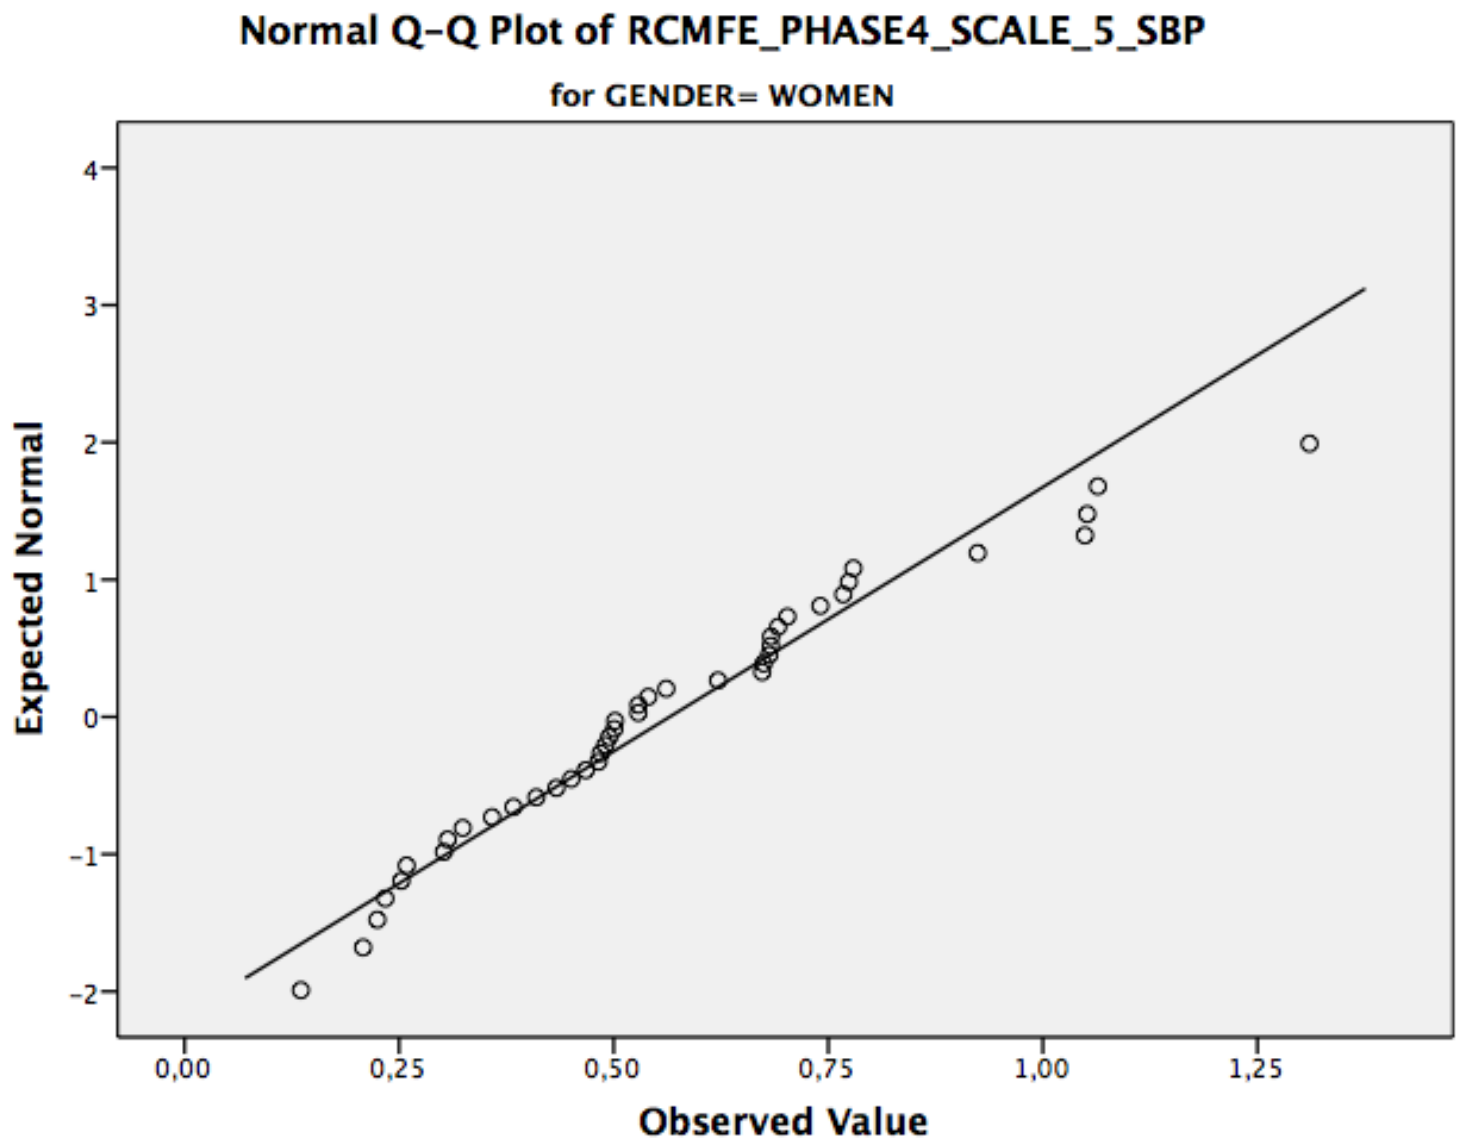

# Normal Q-Q Plot of RCMFE\_PHASE4\_SCALE\_5\_SBP

for GENDER= MEN

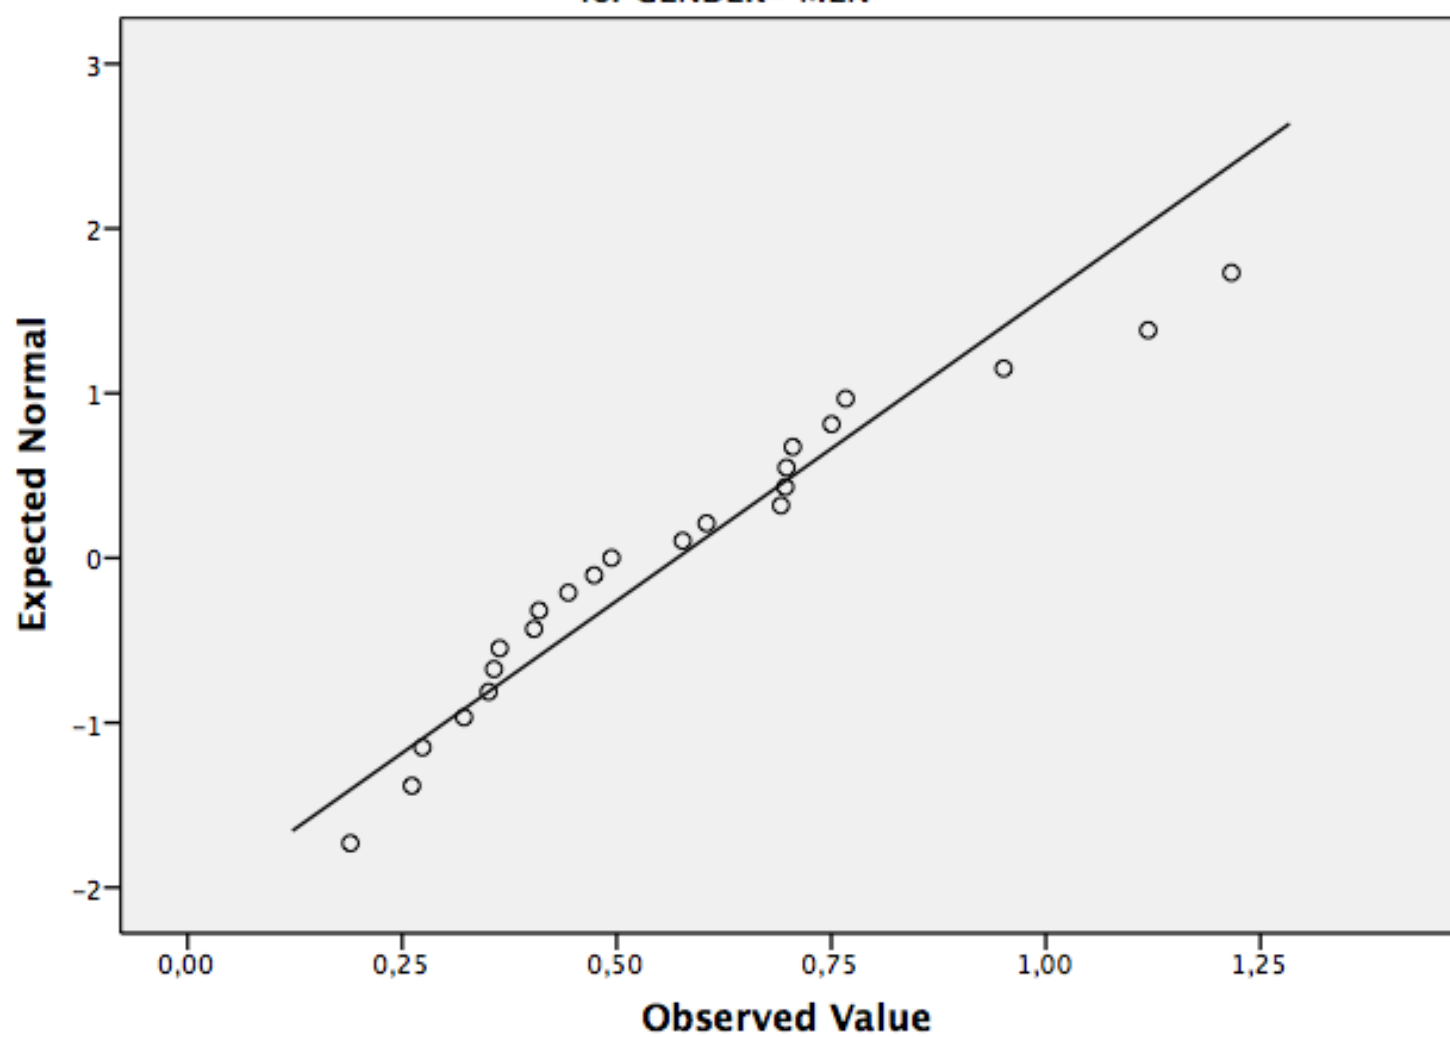

Normal Q-Q Plots

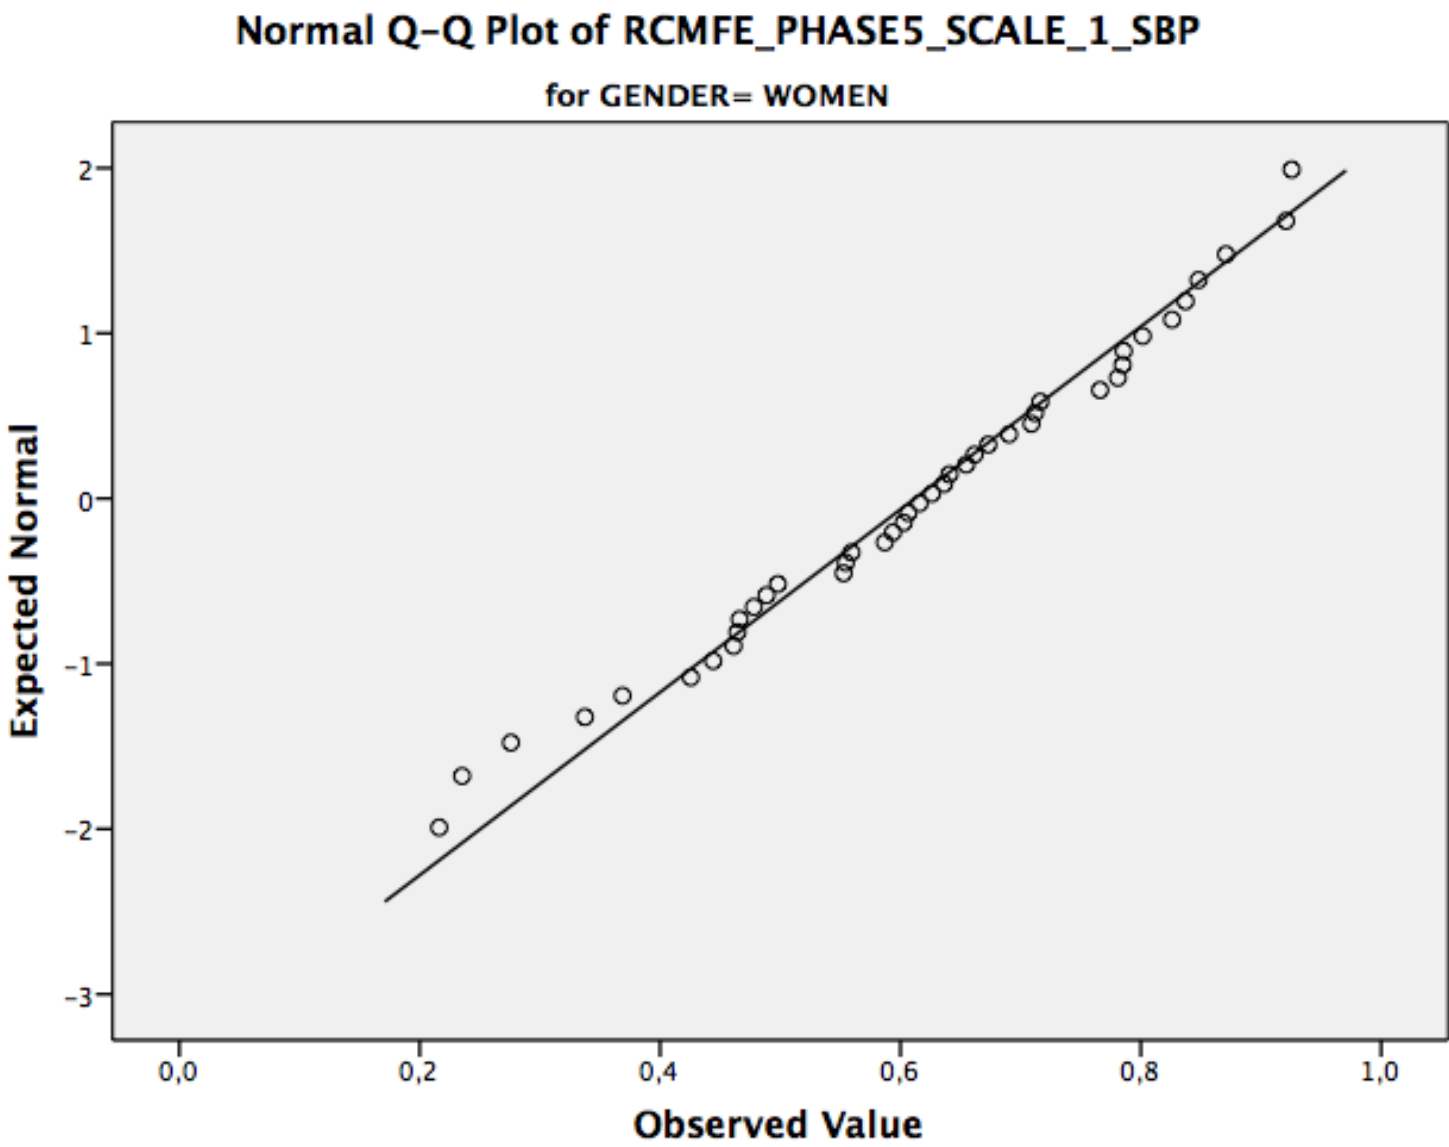



# Normal Q-Q Plot of RCMFE\_PHASE5\_SCALE\_1\_SBP

for GENDER= MEN

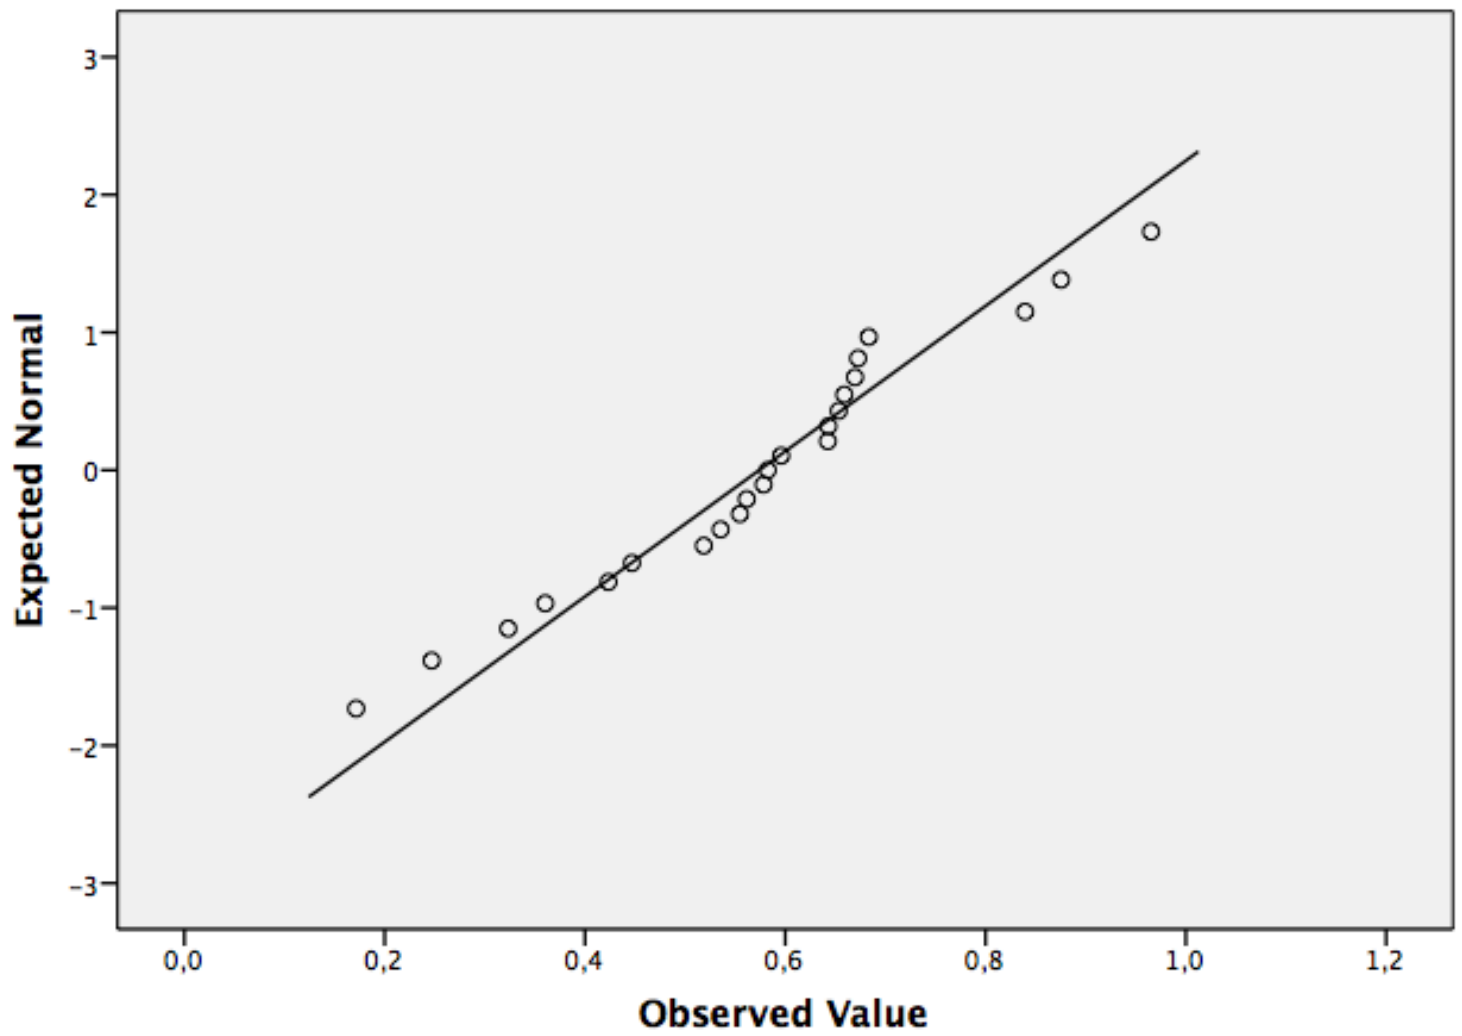

Normal Q-Q Plots

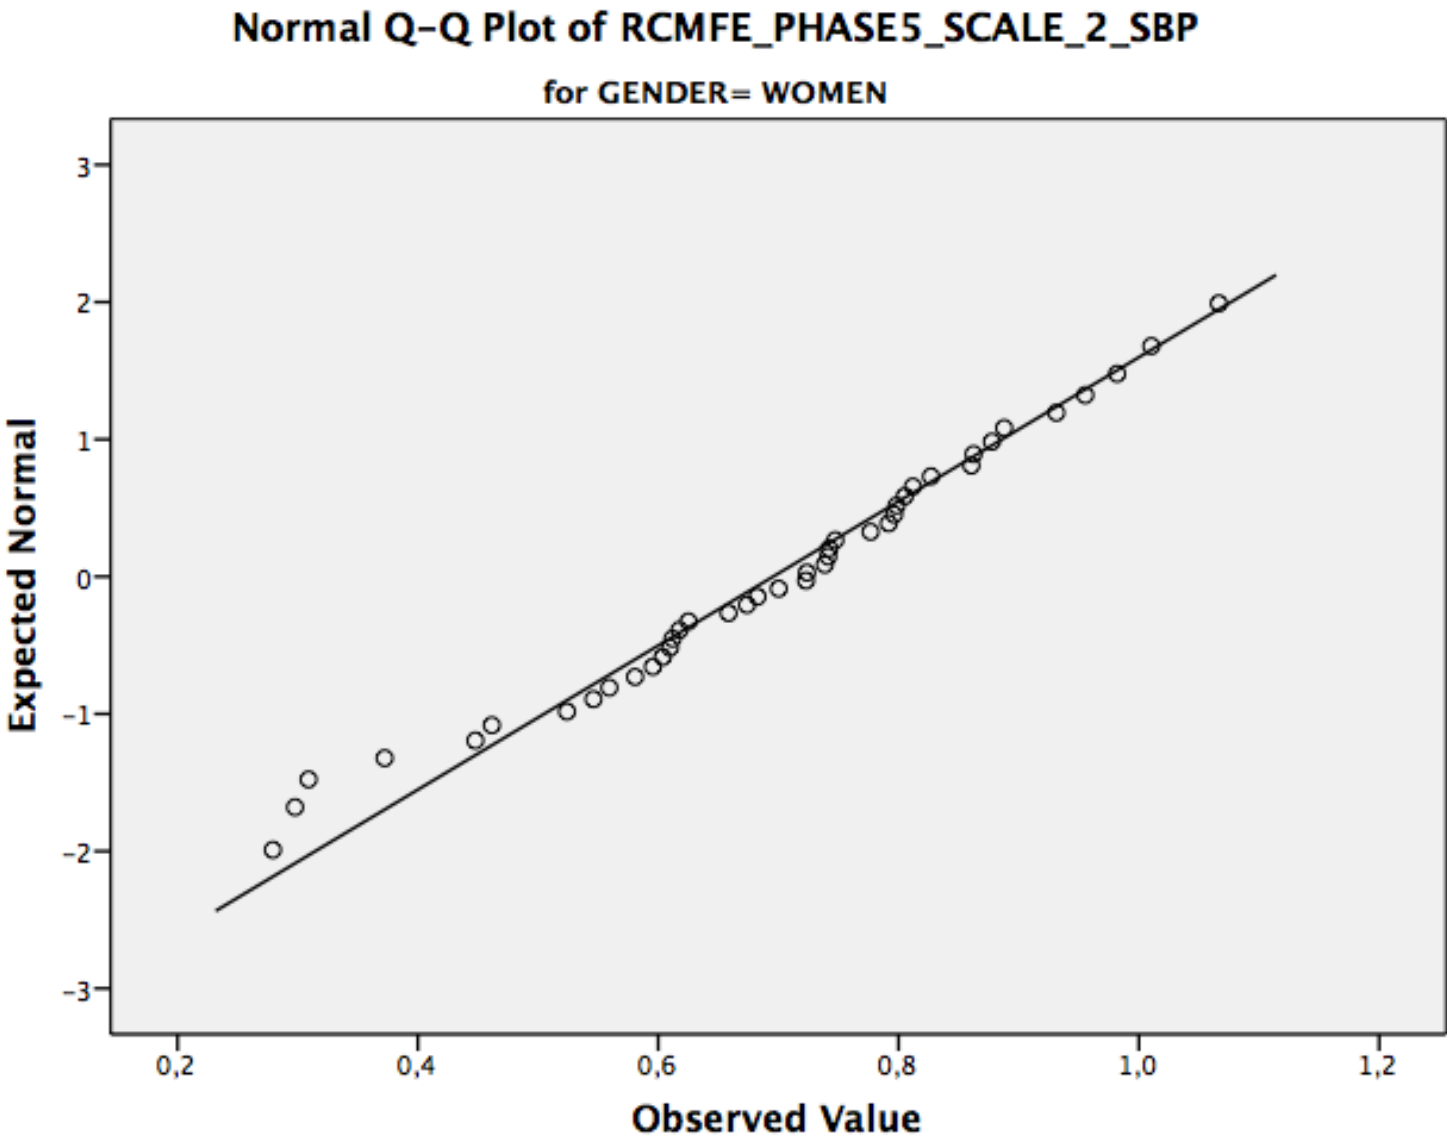

# Normal Q-Q Plot of RCMFE\_PHASE5\_SCALE\_2\_SBP

for GENDER= MEN

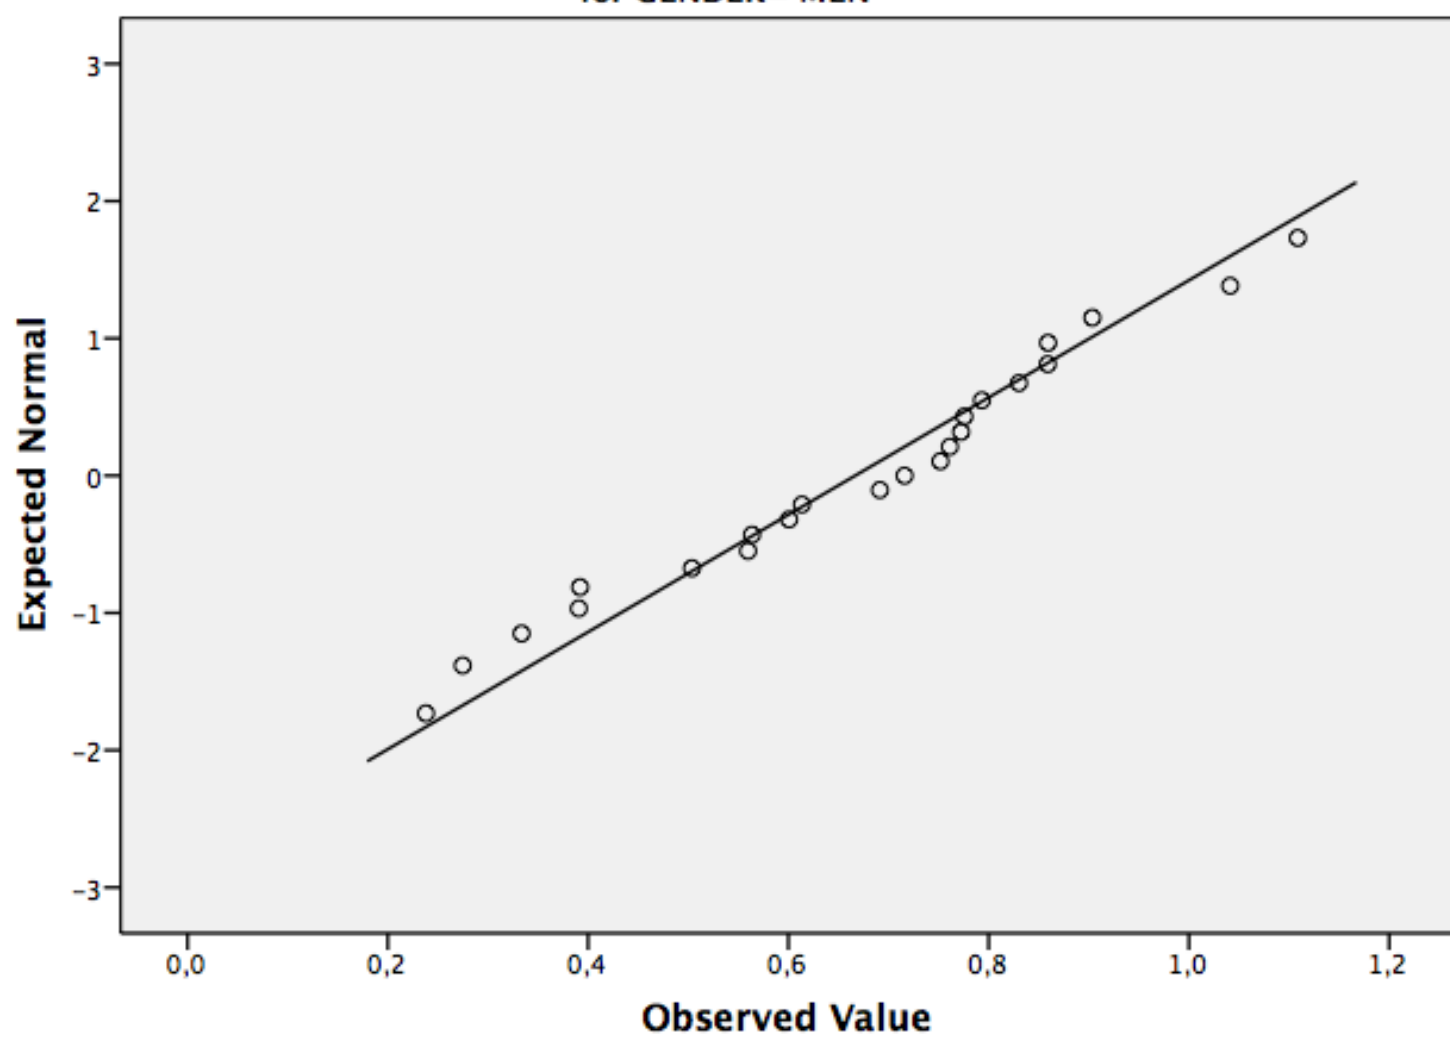

Normal Q-Q Plots

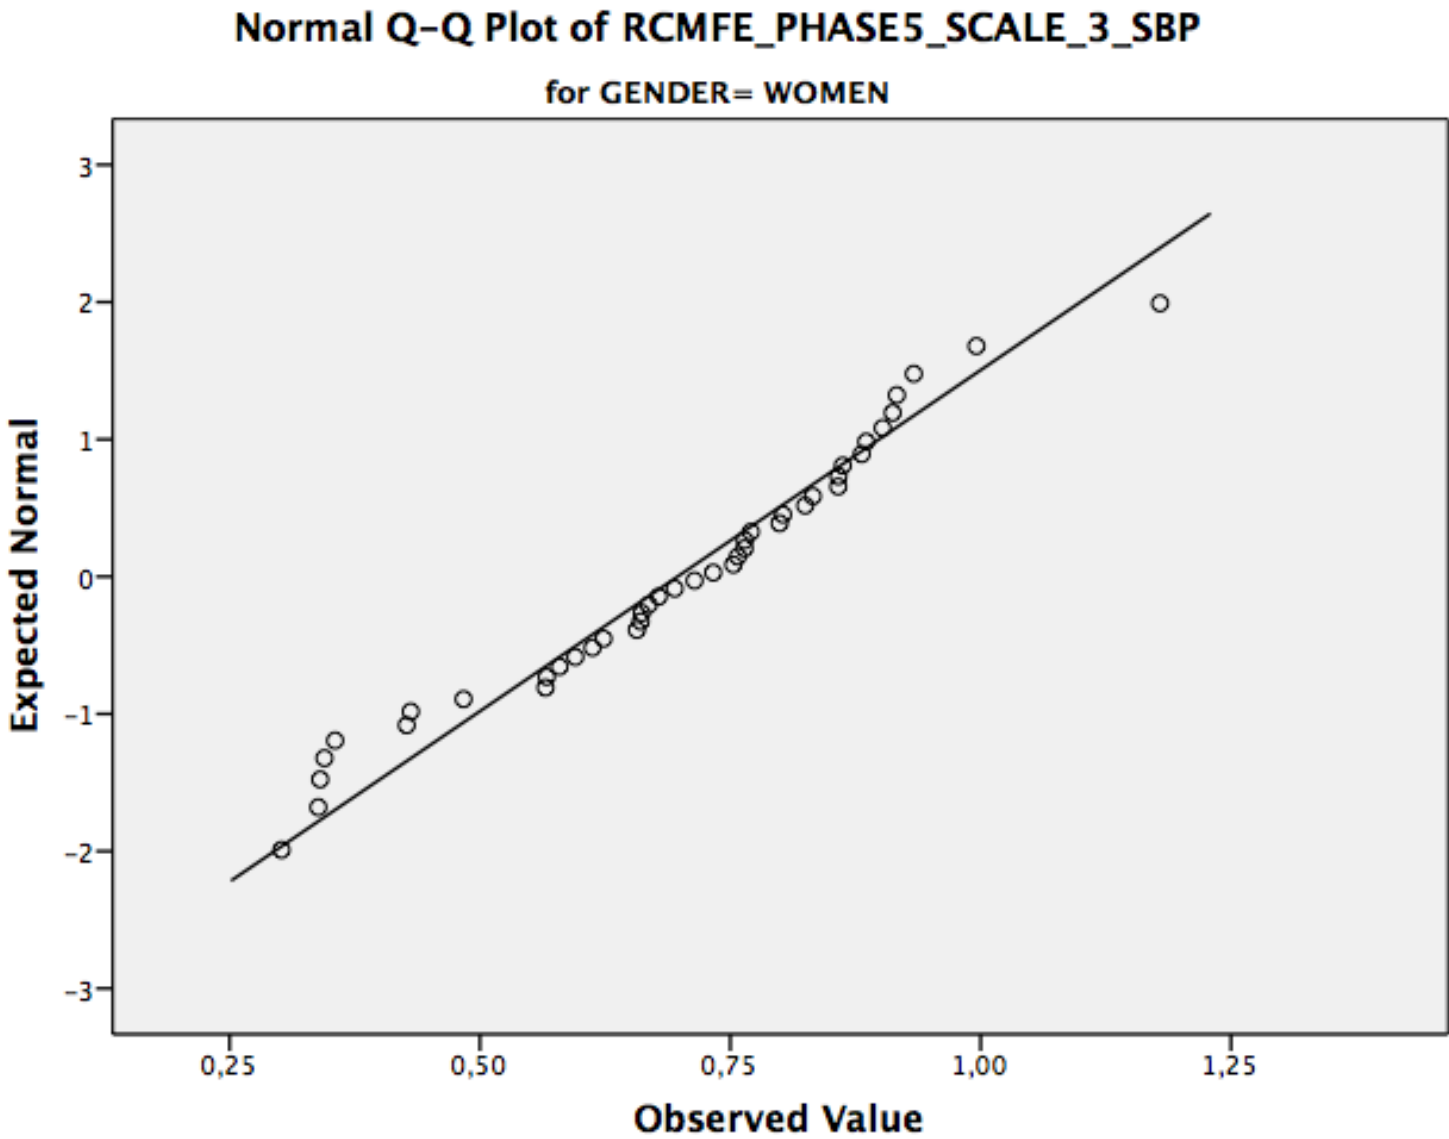

# Normal Q-Q Plot of RCMFE\_PHASE5\_SCALE\_3\_SBP

for GENDER= MEN

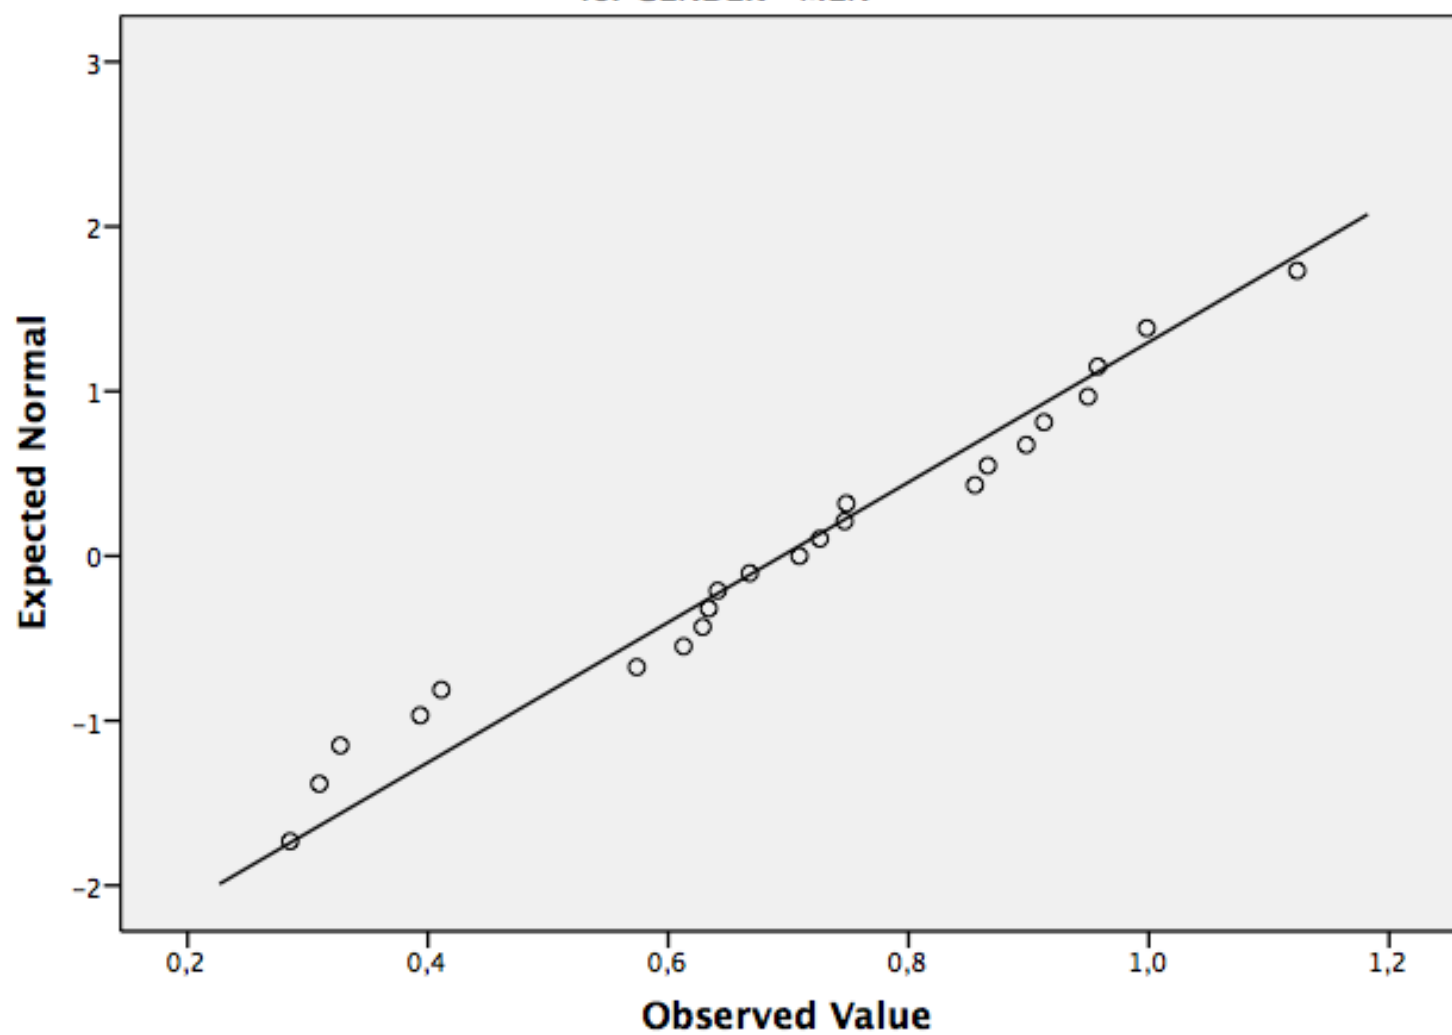

Normal Q-Q Plots

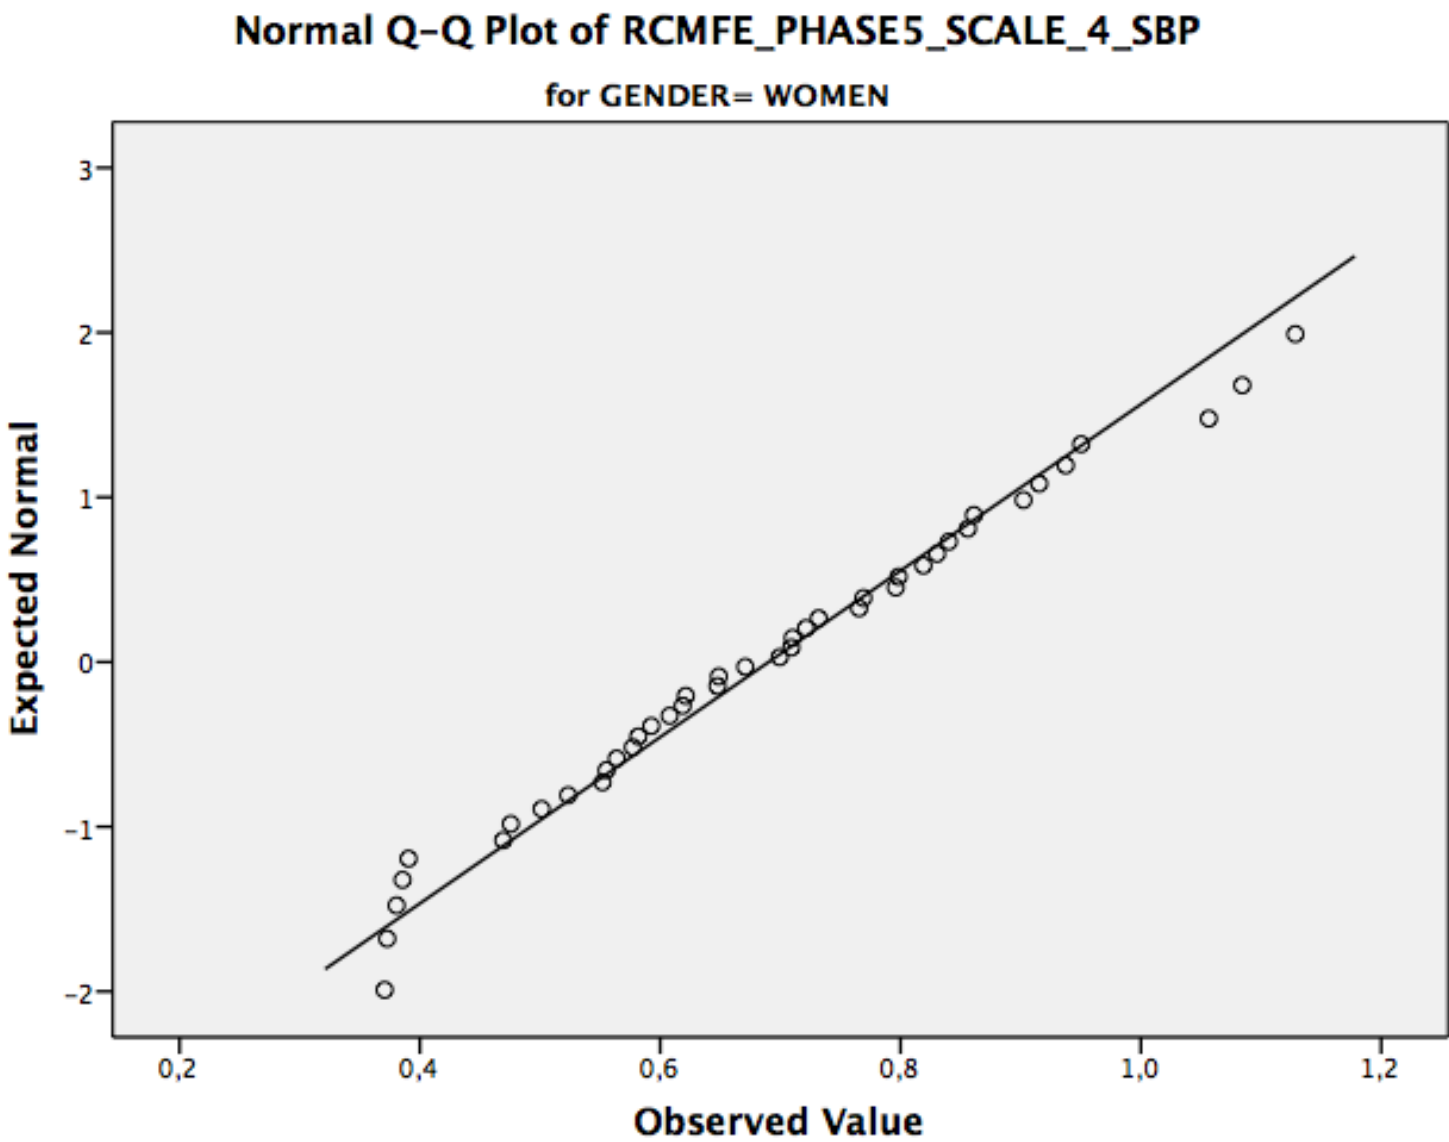

# Normal Q-Q Plot of RCMFE\_PHASE5\_SCALE\_4\_SBP

for GENDER= MEN

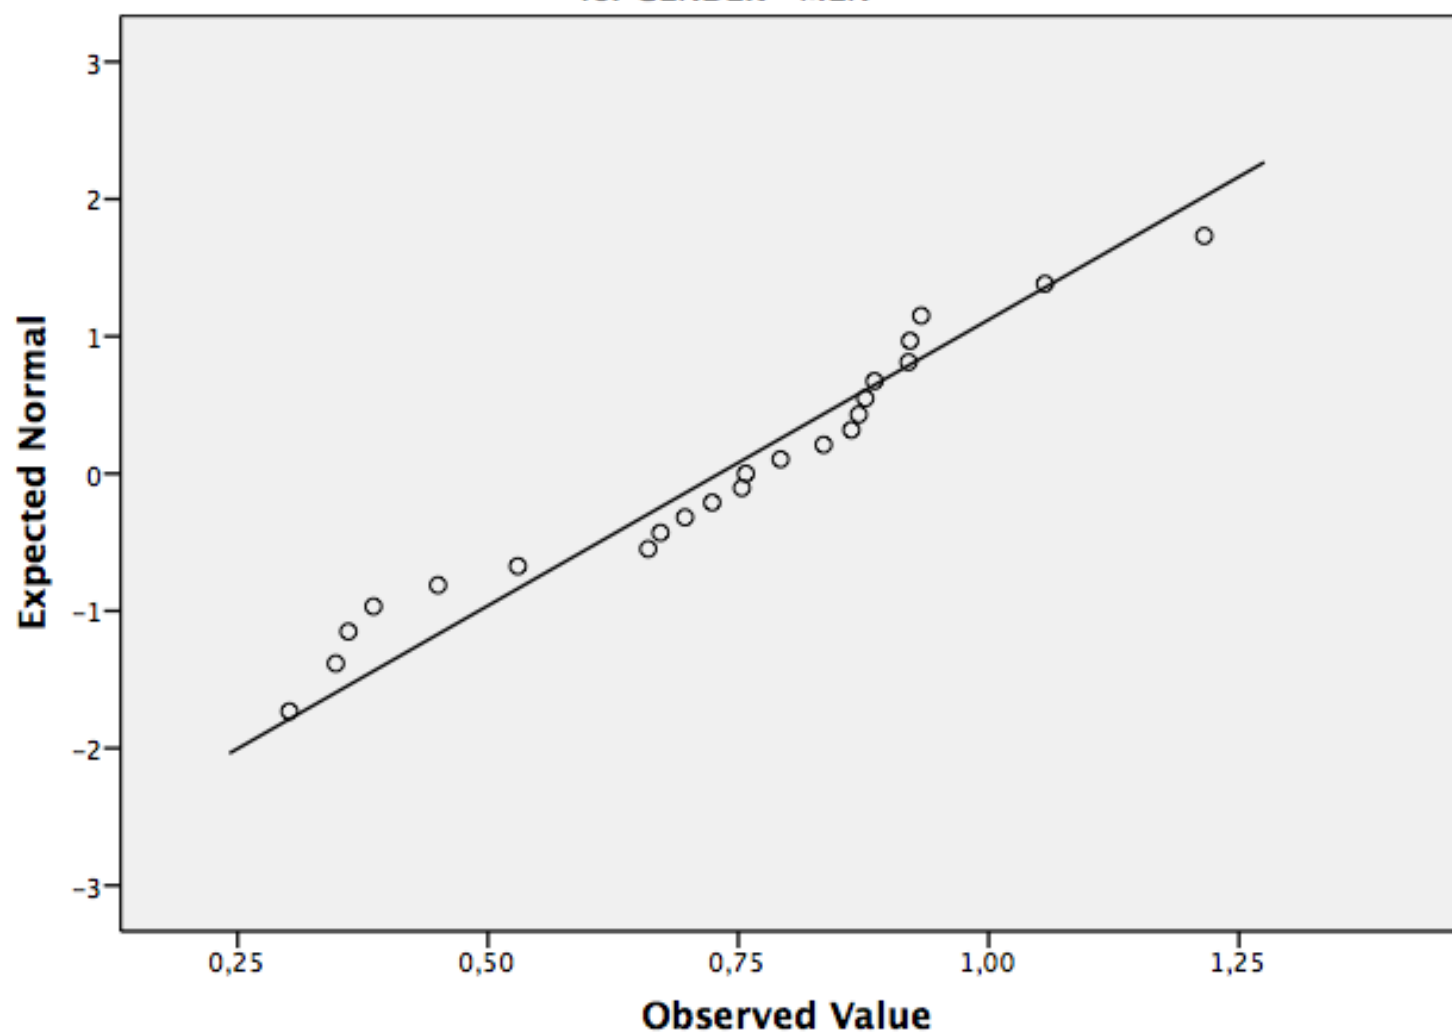

Normal Q-Q Plots

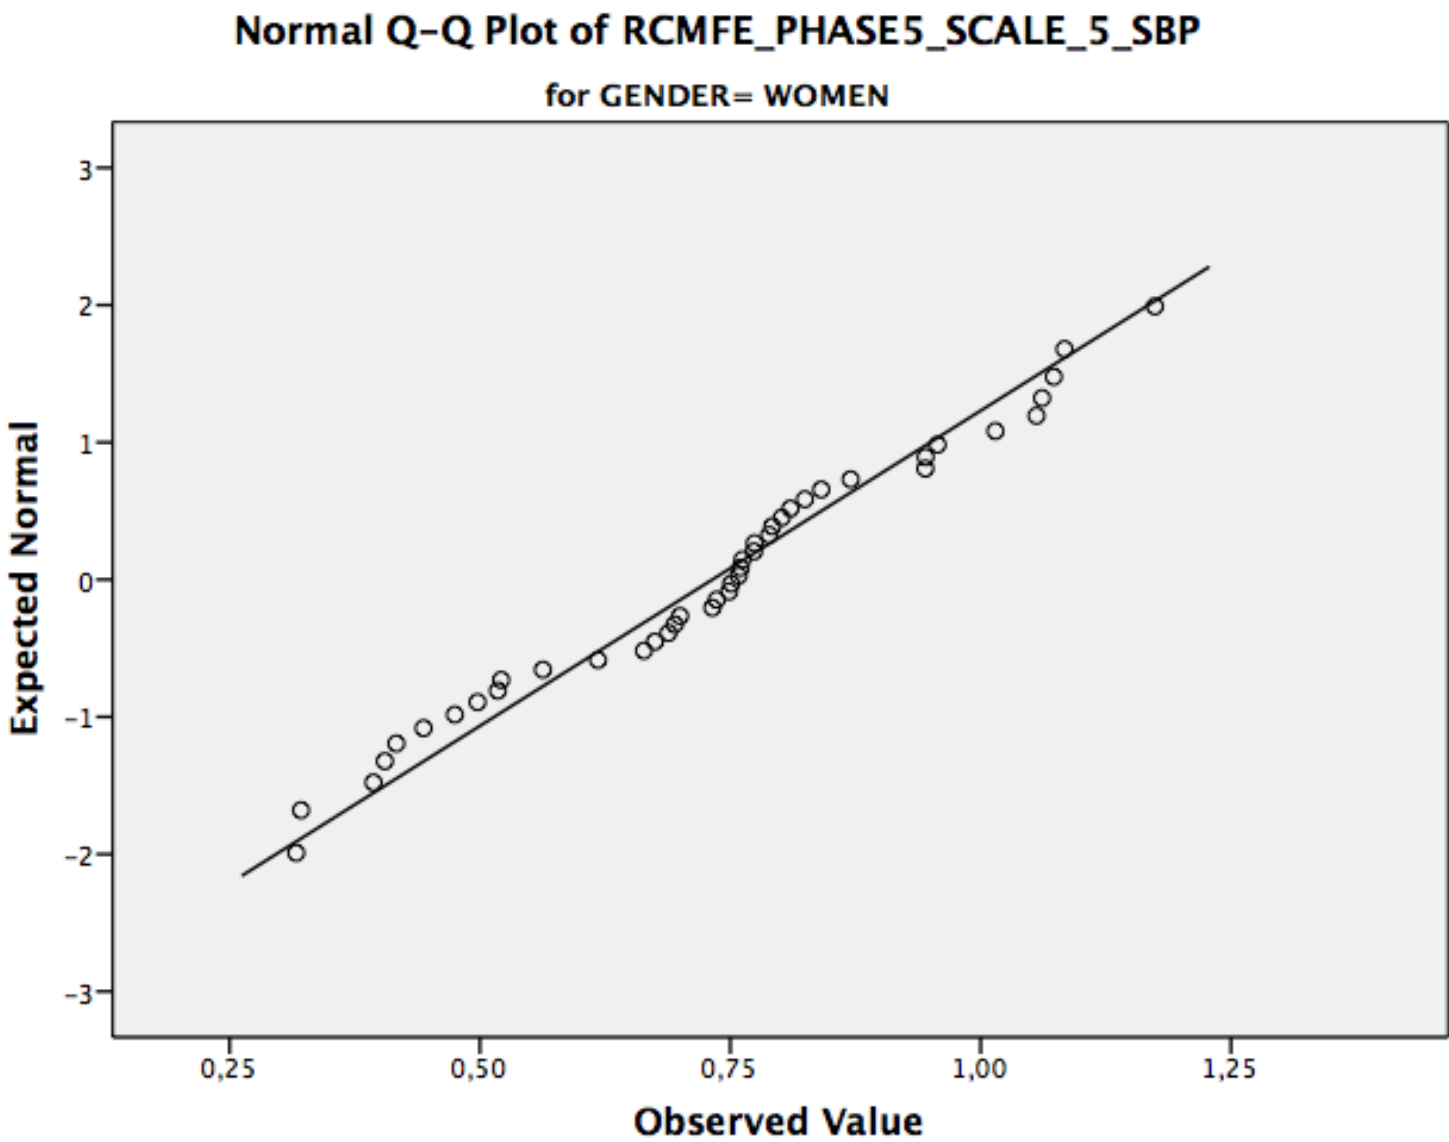



# Normal Q-Q Plot of RCMFE\_PHASE5\_SCALE\_5\_SBP

for GENDER= MEN

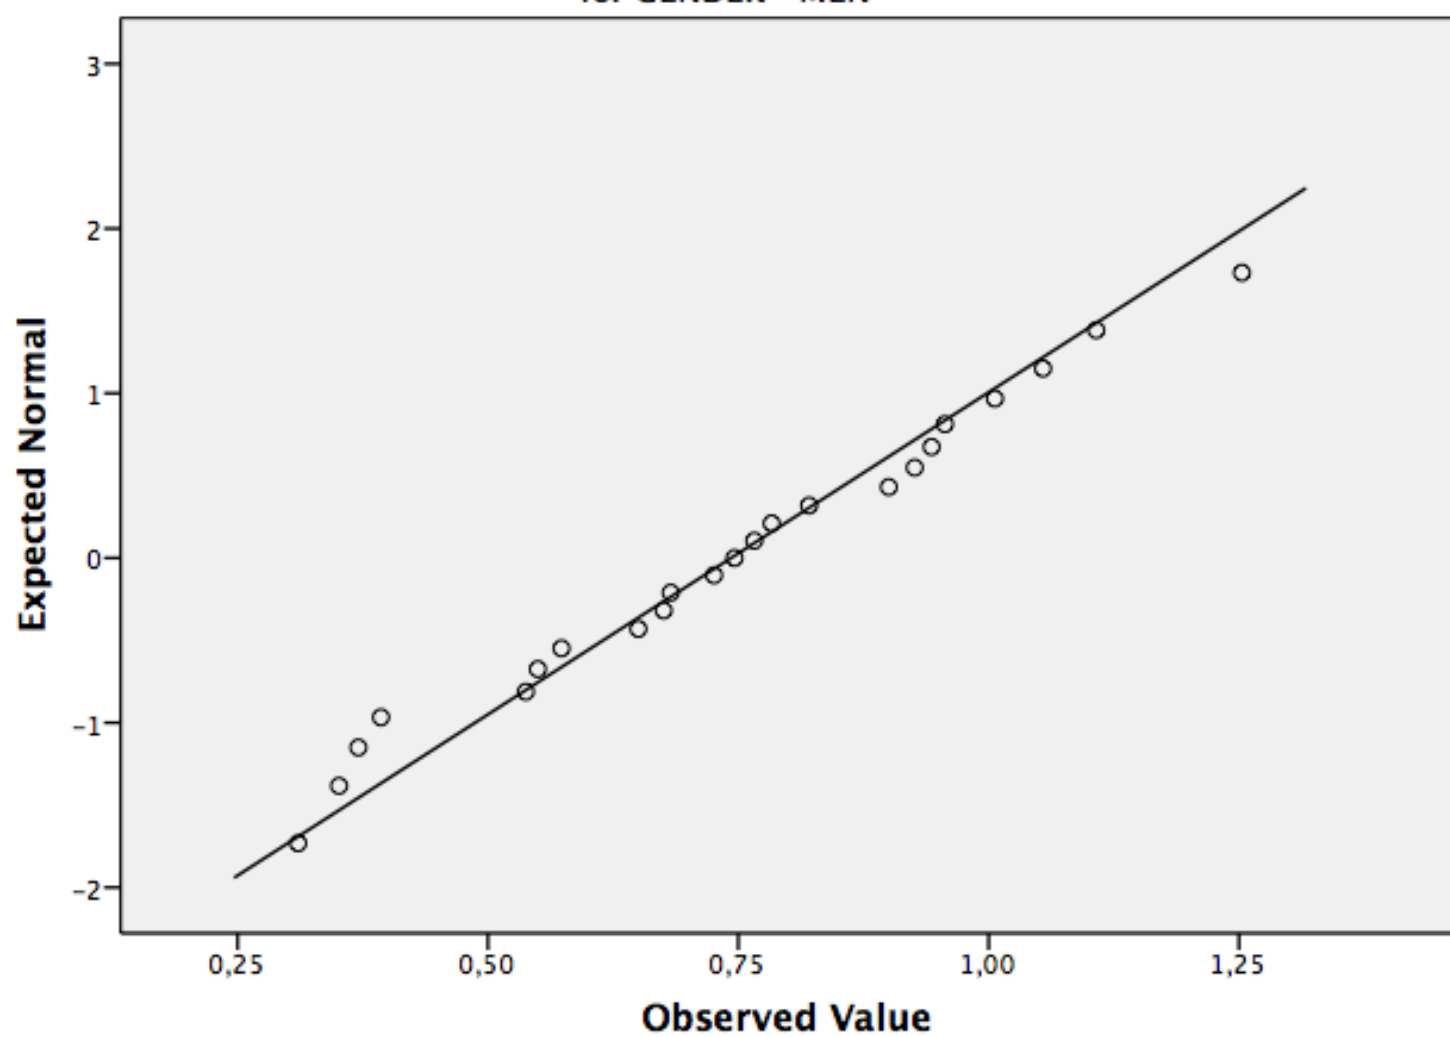

PATHOLOGY

Case Processing Summary

| PATHOLOGY                  | Cases |         |         |         |       |         |
|----------------------------|-------|---------|---------|---------|-------|---------|
|                            | Valid |         | Missing |         | Total |         |
|                            | N     | Percent | N       | Percent | N     | Percent |
| RCMFE_PHASE1_SCALE_1 NO-OI | 29    | 100,0%  | 0       | 0,0%    | 29    | 100,0%  |
| _SBP OI                    | 36    | 100,0%  | 0       | 0,0%    | 36    | 100,0%  |
| RCMFE_PHASE1_SCALE_2 NO-OI | 29    | 100,0%  | 0       | 0,0%    | 29    | 100,0%  |
| _SBP OI                    | 36    | 100,0%  | 0       | 0,0%    | 36    | 100,0%  |
| RCMFE_PHASE1_SCALE_3 NO-OI | 29    | 100,0%  | 0       | 0,0%    | 29    | 100,0%  |
| _SBP OI                    | 36    | 100,0%  | 0       | 0,0%    | 36    | 100,0%  |
| RCMFE_PHASE1_SCALE_4 NO-OI | 29    | 100,0%  | 0       | 0,0%    | 29    | 100,0%  |
| _SBP OI                    | 36    | 100,0%  | 0       | 0,0%    | 36    | 100,0%  |
| RCMFE_PHASE1_SCALE_5 NO-OI | 29    | 100,0%  | 0       | 0,0%    | 29    | 100,0%  |
| _SBP OI                    | 36    | 100,0%  | 0       | 0,0%    | 36    | 100,0%  |
| RCMFE_PHASE2_SCALE_1 NO-OI | 29    | 100,0%  | 0       | 0,0%    | 29    | 100,0%  |
| _SBP OI                    | 36    | 100,0%  | 0       | 0,0%    | 36    | 100,0%  |
| RCMFE_PHASE2_SCALE_2 NO-OI | 29    | 100,0%  | 0       | 0,0%    | 29    | 100,0%  |
| _SBP OI                    | 36    | 100,0%  | 0       | 0,0%    | 36    | 100,0%  |
| RCMFE_PHASE2_SCALE_3 NO-OI | 29    | 100,0%  | 0       | 0,0%    | 29    | 100,0%  |
| _SBP OI                    | 36    | 100,0%  | 0       | 0,0%    | 36    | 100,0%  |
| RCMFE_PHASE2_SCALE_4 NO-OI | 29    | 100,0%  | 0       | 0,0%    | 29    | 100,0%  |
| _SBP OI                    | 36    | 100,0%  | 0       | 0,0%    | 36    | 100,0%  |
| RCMFE_PHASE2_SCALE_5 NO-OI | 29    | 100,0%  | 0       | 0,0%    | 29    | 100,0%  |
| _SBP OI                    | 36    | 100,0%  | 0       | 0,0%    | 36    | 100,0%  |
| RCMFE_PHASE3_SCALE_1 NO-OI | 29    | 100,0%  | 0       | 0,0%    | 29    | 100,0%  |
| _SBP OI                    | 36    | 100,0%  | 0       | 0,0%    | 36    | 100,0%  |
| RCMFE_PHASE3_SCALE_2 NO-OI | 29    | 100,0%  | 0       | 0,0%    | 29    | 100,0%  |
| _SBP OI                    | 36    | 100,0%  | 0       | 0,0%    | 36    | 100,0%  |
| RCMFE_PHASE3_SCALE_3 NO-OI | 29    | 100,0%  | 0       | 0,0%    | 29    | 100,0%  |
| _SBP OI                    | 36    | 100,0%  | 0       | 0,0%    | 36    | 100,0%  |
| RCMFE_PHASE3_SCALE_4 NO-OI | 29    | 100,0%  | 0       | 0,0%    | 29    | 100,0%  |
| _SBP OI                    | 36    | 100,0%  | 0       | 0,0%    | 36    | 100,0%  |
| RCMFE_PHASE3_SCALE_5 NO-OI | 29    | 100,0%  | 0       | 0,0%    | 29    | 100,0%  |
| _SBP OI                    | 36    | 100,0%  | 0       | 0,0%    | 36    | 100,0%  |
| RCMFE_PHASE4_SCALE_1 NO-OI | 29    | 100,0%  | 0       | 0,0%    | 29    | 100,0%  |
| _SBP OI                    | 36    | 100,0%  | 0       | 0,0%    | 36    | 100,0%  |
| RCMFE_PHASE4_SCALE_2 NO-OI | 29    | 100,0%  | 0       | 0,0%    | 29    | 100,0%  |
| _SBP OI                    | 36    | 100,0%  | 0       | 0,0%    | 36    | 100,0%  |
| RCMFE_PHASE4_SCALE_3 NO-OI | 29    | 100,0%  | 0       | 0,0%    | 29    | 100,0%  |
| _SBP OI                    | 36    | 100,0%  | 0       | 0,0%    | 36    | 100,0%  |
| RCMFE_PHASE4_SCALE_4 NO-OI | 29    | 100,0%  | 0       | 0,0%    | 29    | 100,0%  |
| _SBP OI                    | 36    | 100,0%  | 0       | 0,0%    | 36    | 100,0%  |
| RCMFE_PHASE4_SCALE_5 NO-OI | 29    | 100,0%  | 0       | 0,0%    | 29    | 100,0%  |

|                      |       |    |        |   |      |    |        |
|----------------------|-------|----|--------|---|------|----|--------|
| _SBP                 | OI    | 36 | 100,0% | 0 | 0,0% | 36 | 100,0% |
| RCMFE_PHASE5_SCALE_1 | NO-OI | 29 | 100,0% | 0 | 0,0% | 29 | 100,0% |
| _SBP                 |       |    |        |   |      |    |        |

#### Case Processing Summary

| PATHOLOGY            |       | Cases |         |         |         |       |         |
|----------------------|-------|-------|---------|---------|---------|-------|---------|
|                      |       | Valid |         | Missing |         | Total |         |
|                      |       | N     | Percent | N       | Percent | N     | Percent |
| RCMFE_PHASE5_SCALE_1 | OI    | 36    | 100,0%  | 0       | 0,0%    | 36    | 100,0%  |
| _SBP                 |       |       |         |         |         |       |         |
| RCMFE_PHASE5_SCALE_2 | NO-OI | 29    | 100,0%  | 0       | 0,0%    | 29    | 100,0%  |
| _SBP                 | OI    | 36    | 100,0%  | 0       | 0,0%    | 36    | 100,0%  |
| RCMFE_PHASE5_SCALE_3 | NO-OI | 29    | 100,0%  | 0       | 0,0%    | 29    | 100,0%  |
| _SBP                 | OI    | 36    | 100,0%  | 0       | 0,0%    | 36    | 100,0%  |
| RCMFE_PHASE5_SCALE_4 | NO-OI | 29    | 100,0%  | 0       | 0,0%    | 29    | 100,0%  |
| _SBP                 | OI    | 36    | 100,0%  | 0       | 0,0%    | 36    | 100,0%  |
| RCMFE_PHASE5_SCALE_5 | NO-OI | 29    | 100,0%  | 0       | 0,0%    | 29    | 100,0%  |
| _SBP                 | OI    | 36    | 100,0%  | 0       | 0,0%    | 36    | 100,0%  |

#### Tests of Normality

| PATHOLOGY            |       | Kolmogorov-Smirnov <sup>a</sup> |    |       | Shapiro-Wilk |    |      |
|----------------------|-------|---------------------------------|----|-------|--------------|----|------|
|                      |       | Statistic                       | df | Sig.  | Statistic    | df | Sig. |
| RCMFE_PHASE1_SCALE_1 | NO-OI | ,149                            | 29 | ,100  | ,953         | 29 | ,214 |
| _SBP                 | OI    | ,095                            | 36 | ,200* | ,974         | 36 | ,557 |
| RCMFE_PHASE1_SCALE_2 | NO-OI | ,064                            | 29 | ,200* | ,990         | 29 | ,994 |
| _SBP                 | OI    | ,079                            | 36 | ,200* | ,974         | 36 | ,538 |
| RCMFE_PHASE1_SCALE_3 | NO-OI | ,135                            | 29 | ,189  | ,965         | 29 | ,437 |
| _SBP                 | OI    | ,071                            | 36 | ,200* | ,974         | 36 | ,541 |
| RCMFE_PHASE1_SCALE_4 | NO-OI | ,148                            | 29 | ,106  | ,948         | 29 | ,162 |
| _SBP                 | OI    | ,099                            | 36 | ,200* | ,974         | 36 | ,546 |
| RCMFE_PHASE1_SCALE_5 | NO-OI | ,086                            | 29 | ,200* | ,984         | 29 | ,917 |
| _SBP                 | OI    | ,076                            | 36 | ,200* | ,986         | 36 | ,923 |
| RCMFE_PHASE2_SCALE_1 | NO-OI | ,085                            | 29 | ,200* | ,961         | 29 | ,341 |
| _SBP                 | OI    | ,081                            | 36 | ,200* | ,981         | 36 | ,791 |
| RCMFE_PHASE2_SCALE_2 | NO-OI | ,126                            | 29 | ,200* | ,973         | 29 | ,635 |
| _SBP                 | OI    | ,071                            | 36 | ,200* | ,982         | 36 | ,812 |
| RCMFE_PHASE2_SCALE_3 | NO-OI | ,127                            | 29 | ,200* | ,975         | 29 | ,705 |
| _SBP                 | OI    | ,106                            | 36 | ,200* | ,962         | 36 | ,256 |
| RCMFE_PHASE2_SCALE_4 | NO-OI | ,103                            | 29 | ,200* | ,977         | 29 | ,762 |
| _SBP                 | OI    | ,098                            | 36 | ,200* | ,962         | 36 | ,253 |
| RCMFE_PHASE2_SCALE_5 | NO-OI | ,151                            | 29 | ,089  | ,945         | 29 | ,134 |
| _SBP                 | OI    | ,113                            | 36 | ,200* | ,962         | 36 | ,254 |
| RCMFE_PHASE3_SCALE_1 | NO-OI | ,090                            | 29 | ,200* | ,962         | 29 | ,363 |
| _SBP                 | OI    | ,112                            | 36 | ,200* | ,951         | 36 | ,115 |
| RCMFE_PHASE3_SCALE_2 | NO-OI | ,082                            | 29 | ,200* | ,980         | 29 | ,845 |
| _SBP                 | OI    | ,135                            | 36 | ,093  | ,980         | 36 | ,760 |
| RCMFE_PHASE3_SCALE_3 | NO-OI | ,143                            | 29 | ,132  | ,953         | 29 | ,218 |

|                      |       |      |    |       |      |    |      |
|----------------------|-------|------|----|-------|------|----|------|
| _SBP                 | OI    | ,125 | 36 | ,167  | ,967 | 36 | ,359 |
| RCMFE_PHASE3_SCALE_4 | NO-OI | ,173 | 29 | ,027  | ,953 | 29 | ,220 |
| _SBP                 | OI    | ,061 | 36 | ,200* | ,977 | 36 | ,632 |
| RCMFE_PHASE3_SCALE_5 | NO-OI | ,117 | 29 | ,200* | ,966 | 29 | ,468 |
| _SBP                 | OI    | ,125 | 36 | ,166  | ,968 | 36 | ,371 |
| RCMFE_PHASE4_SCALE_1 | NO-OI | ,109 | 29 | ,200* | ,973 | 29 | ,639 |
| _SBP                 | OI    | ,130 | 36 | ,128  | ,941 | 36 | ,056 |
| RCMFE_PHASE4_SCALE_2 | NO-OI | ,145 | 29 | ,122  | ,951 | 29 | ,198 |
| _SBP                 | OI    | ,155 | 36 | ,029  | ,936 | 36 | ,058 |
| RCMFE_PHASE4_SCALE_3 | NO-OI | ,159 | 29 | ,058  | ,928 | 29 | ,048 |
|                      | OI    | ,116 | 36 | ,200* | ,947 | 36 | ,084 |
| RCMFE_PHASE4_SCALE_4 | NO-OI | ,164 | 29 | ,044  | ,949 | 29 | ,175 |
| _SBP                 | OI    | ,129 | 36 | ,137  | ,949 | 36 | ,097 |
| RCMFE_PHASE4_SCALE_5 | NO-OI | ,155 | 29 | ,073  | ,937 | 29 | ,085 |
| _SBP                 | OI    | ,112 | 36 | ,200* | ,956 | 36 | ,167 |
| RCMFE_PHASE5_SCALE_1 | NO-OI | ,085 | 29 | ,200* | ,970 | 29 | ,553 |
| _SBP                 | OI    | ,104 | 36 | ,200* | ,973 | 36 | ,507 |

#### Tests of Normality

| PATHOLOGY            |       | Kolmogorov-Smirnov <sup>a</sup> |    |       | Shapiro-Wilk |    |      |
|----------------------|-------|---------------------------------|----|-------|--------------|----|------|
|                      |       | Statistic                       | df | Sig.  | Statistic    | df | Sig. |
| RCMFE_PHASE5_SCALE_2 | NO-OI | ,179                            | 29 | ,019  | ,921         | 29 | ,052 |
| _SBP                 | OI    | ,088                            | 36 | ,200* | ,973         | 36 | ,505 |
| RCMFE_PHASE5_SCALE_3 | NO-OI | ,150                            | 29 | ,094* | ,920         | 29 | ,031 |
| _SBP                 | OI    | ,080                            | 36 | ,200* | ,992         | 36 | ,994 |
| RCMFE_PHASE5_SCALE_4 | NO-OI | ,140                            | 29 | ,153  | ,940         | 29 | ,102 |
| _SBP                 | OI    | ,069                            | 36 | ,200* | ,990         | 36 | ,978 |
| RCMFE_PHASE5_SCALE_5 | NO-OI | ,127                            | 29 | ,200  | ,916         | 29 | ,025 |
| _SBP                 | OI    | ,160                            | 36 | ,020* | ,965         | 36 | ,308 |

\*. This is a lower bound of the true significance.

a. Lilliefors Significance Correction

Normal Q-Q Plots

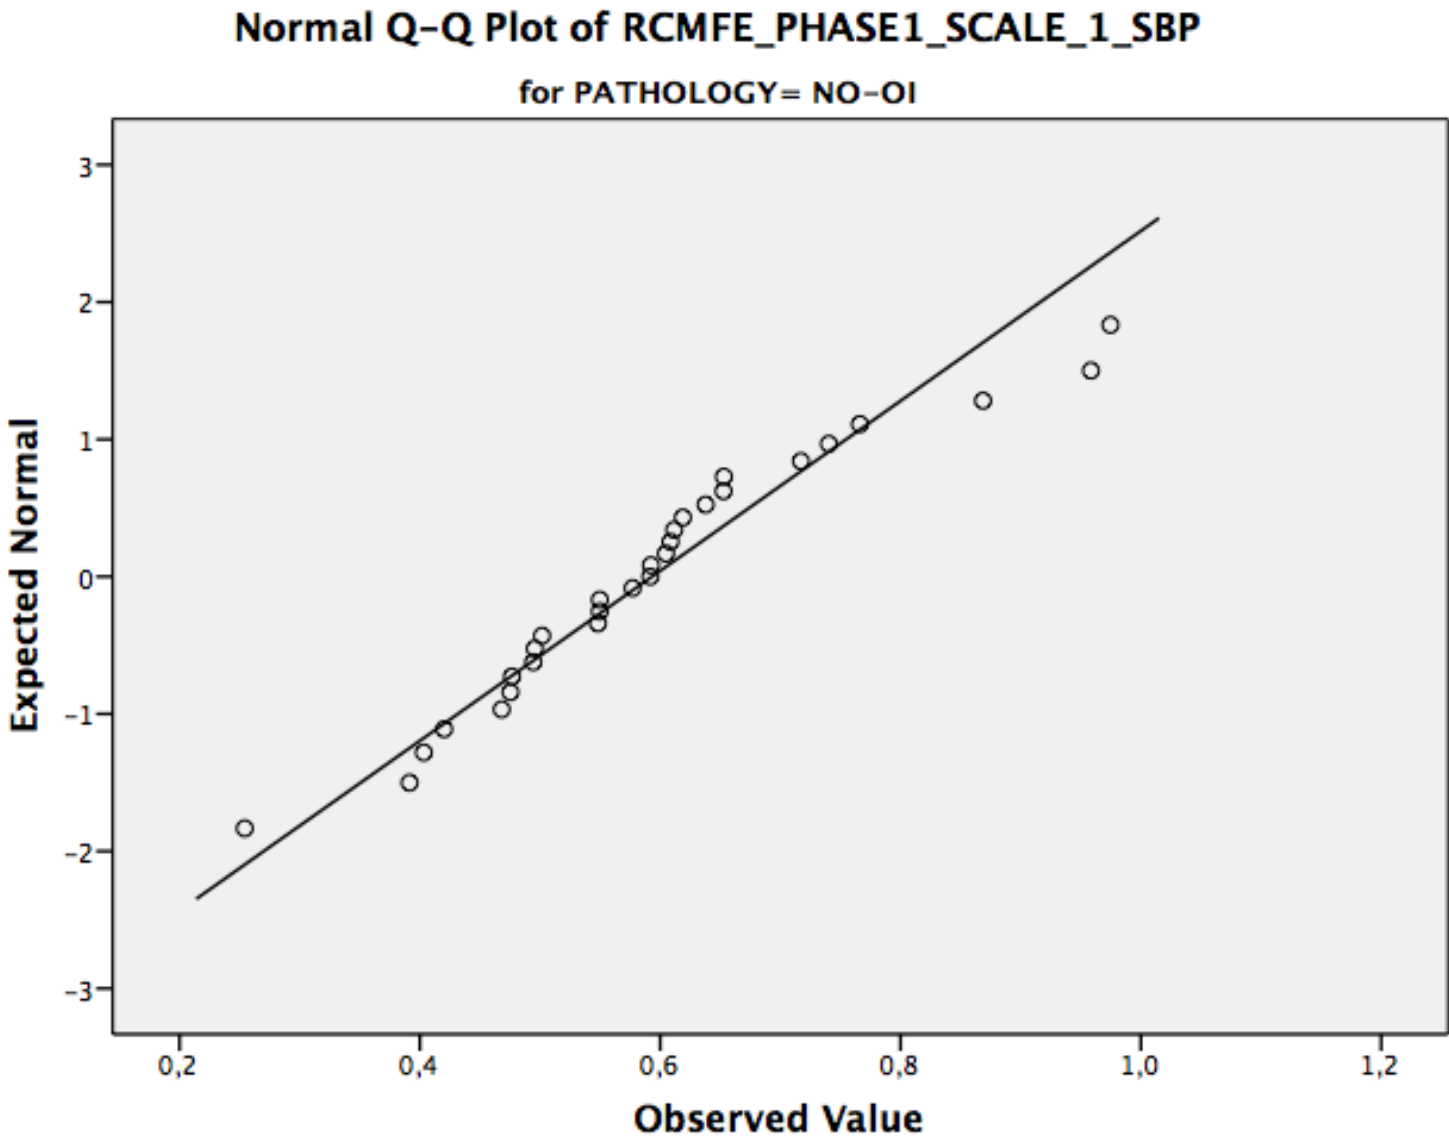

# Normal Q-Q Plot of RCMFE\_PHASE1\_SCALE\_1\_SBP

for PATHOLOGY= OI

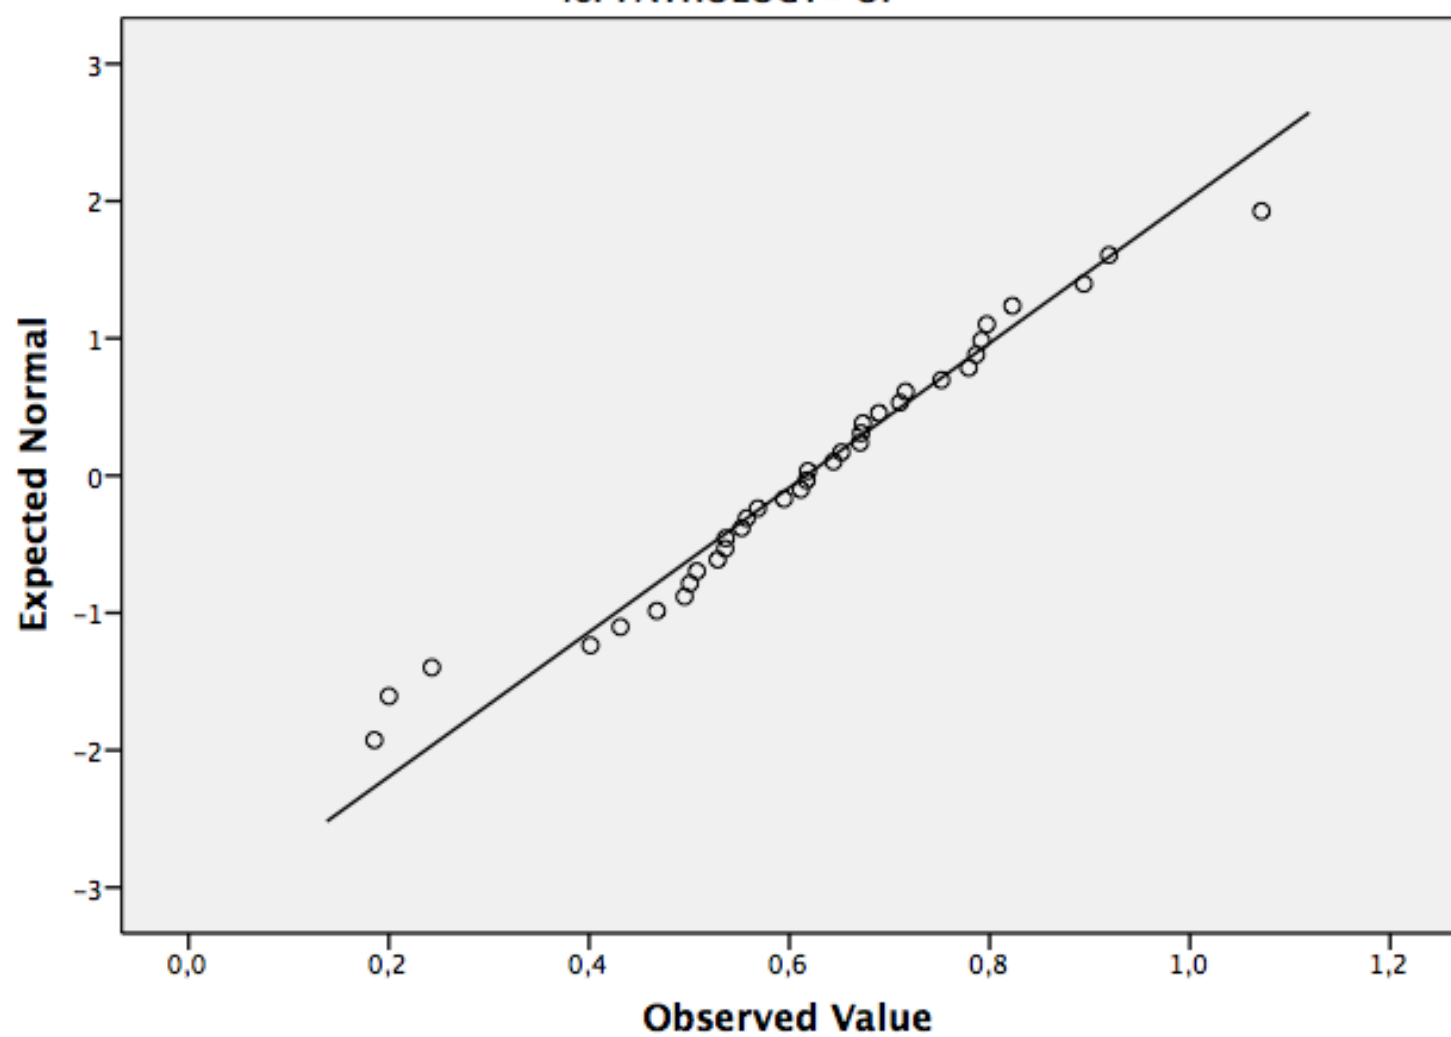

Normal Q-Q Plots

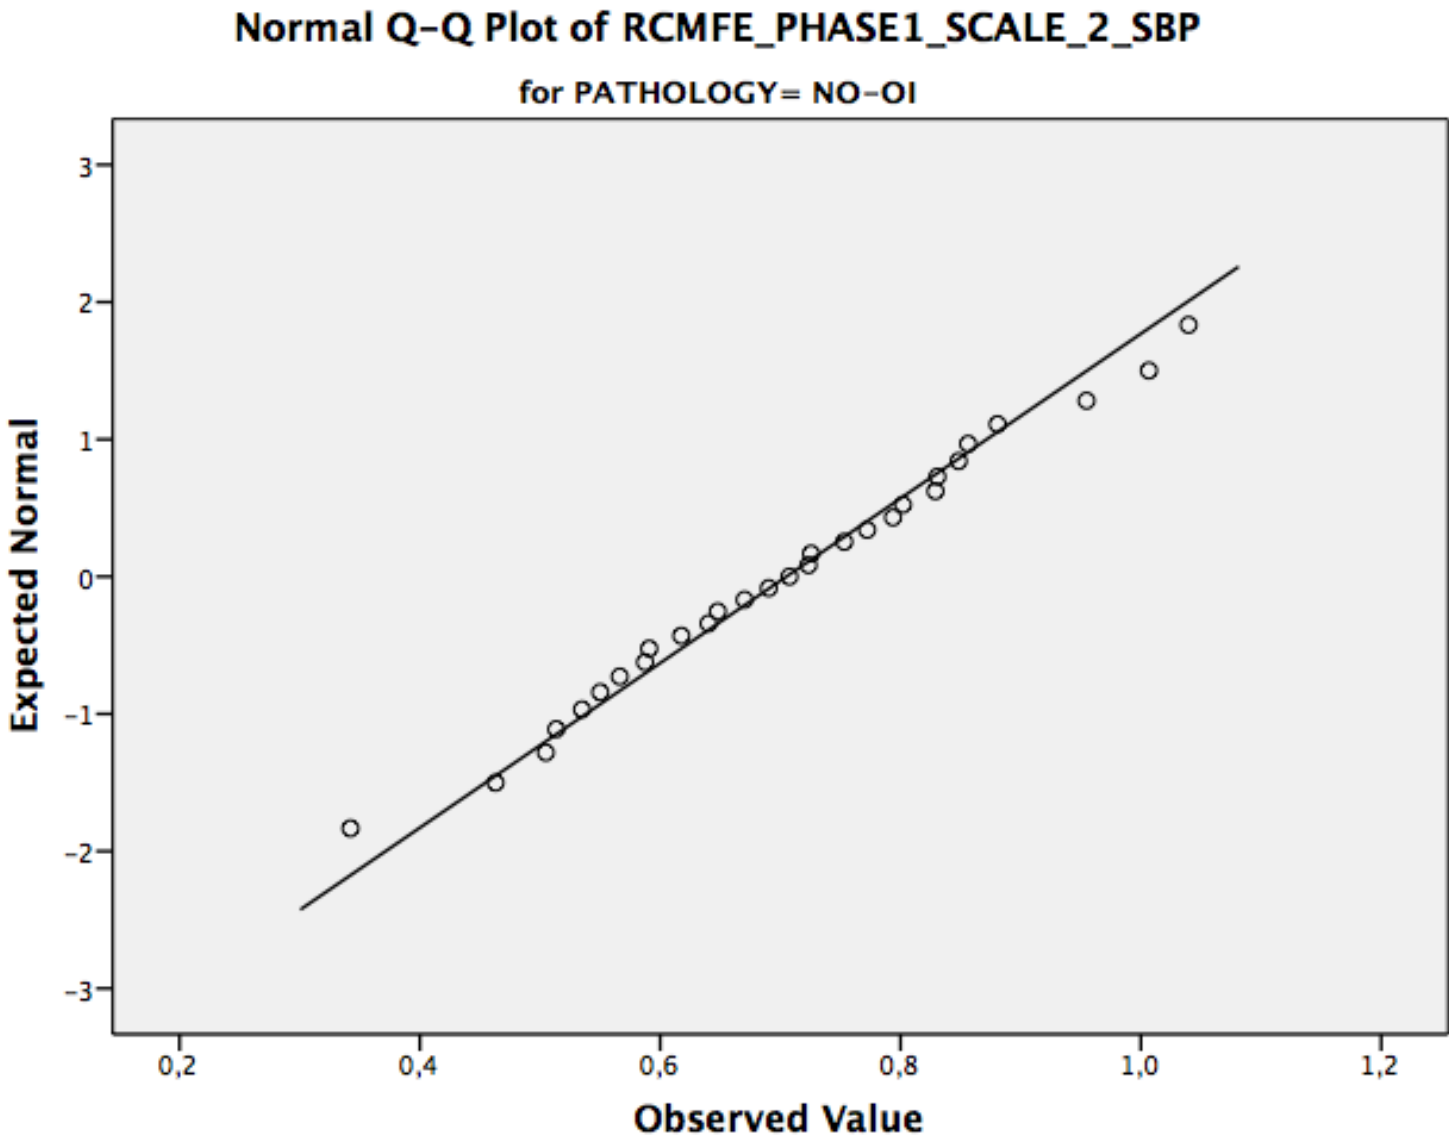

# Normal Q-Q Plot of RCMFE\_PHASE1\_SCALE\_2\_SBP

for PATHOLOGY= OI

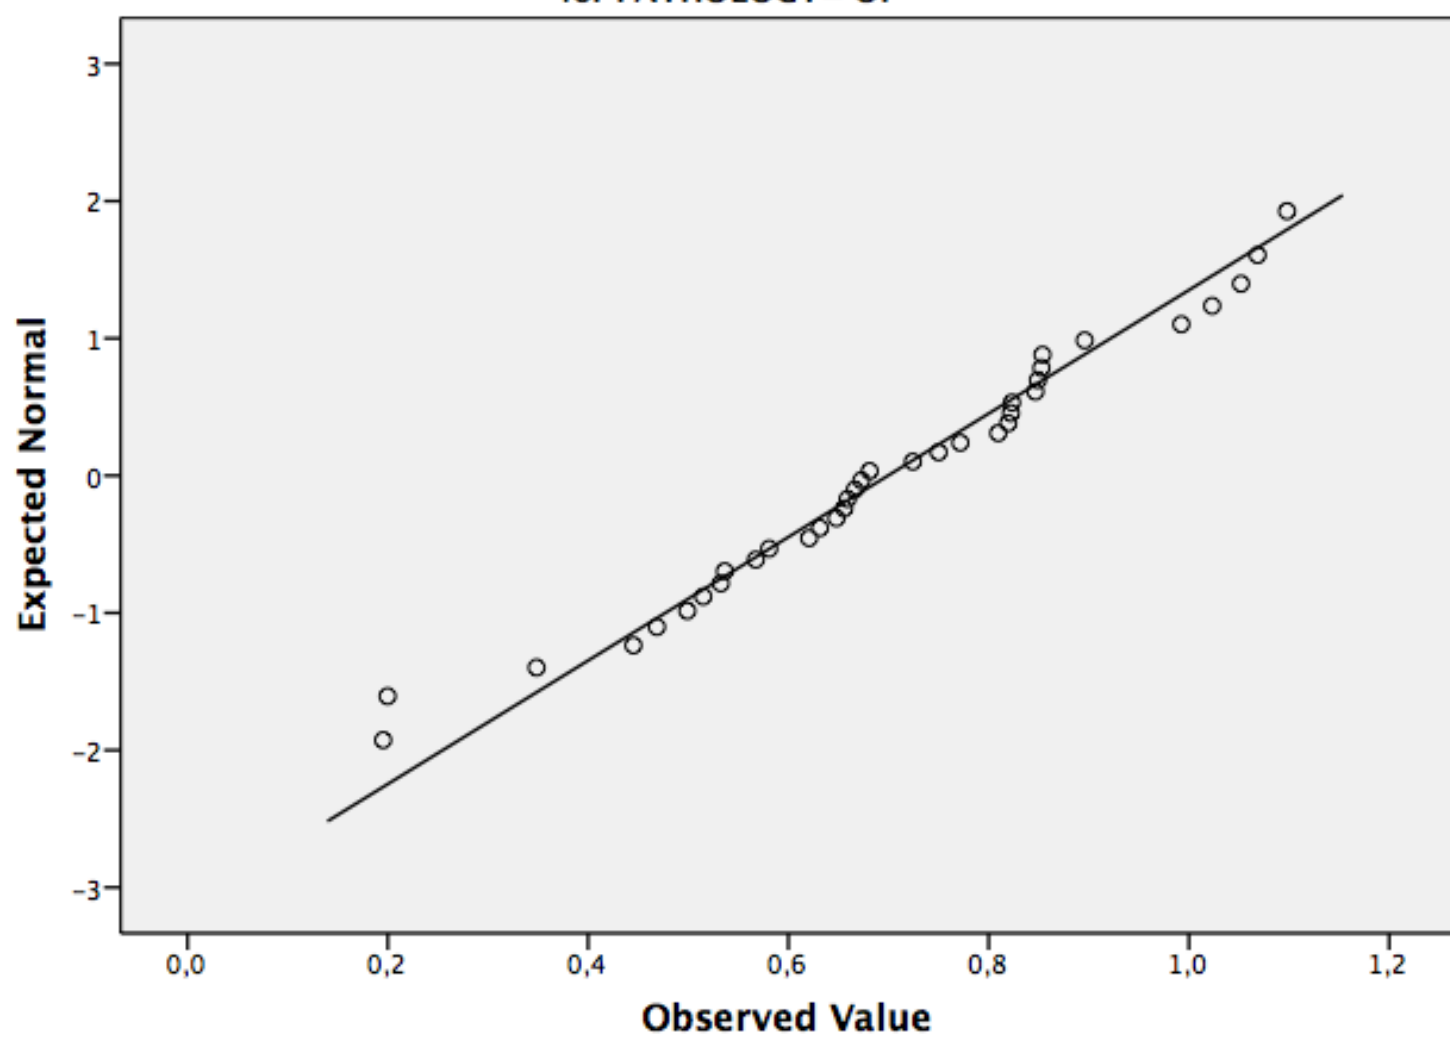



Normal Q-Q Plots

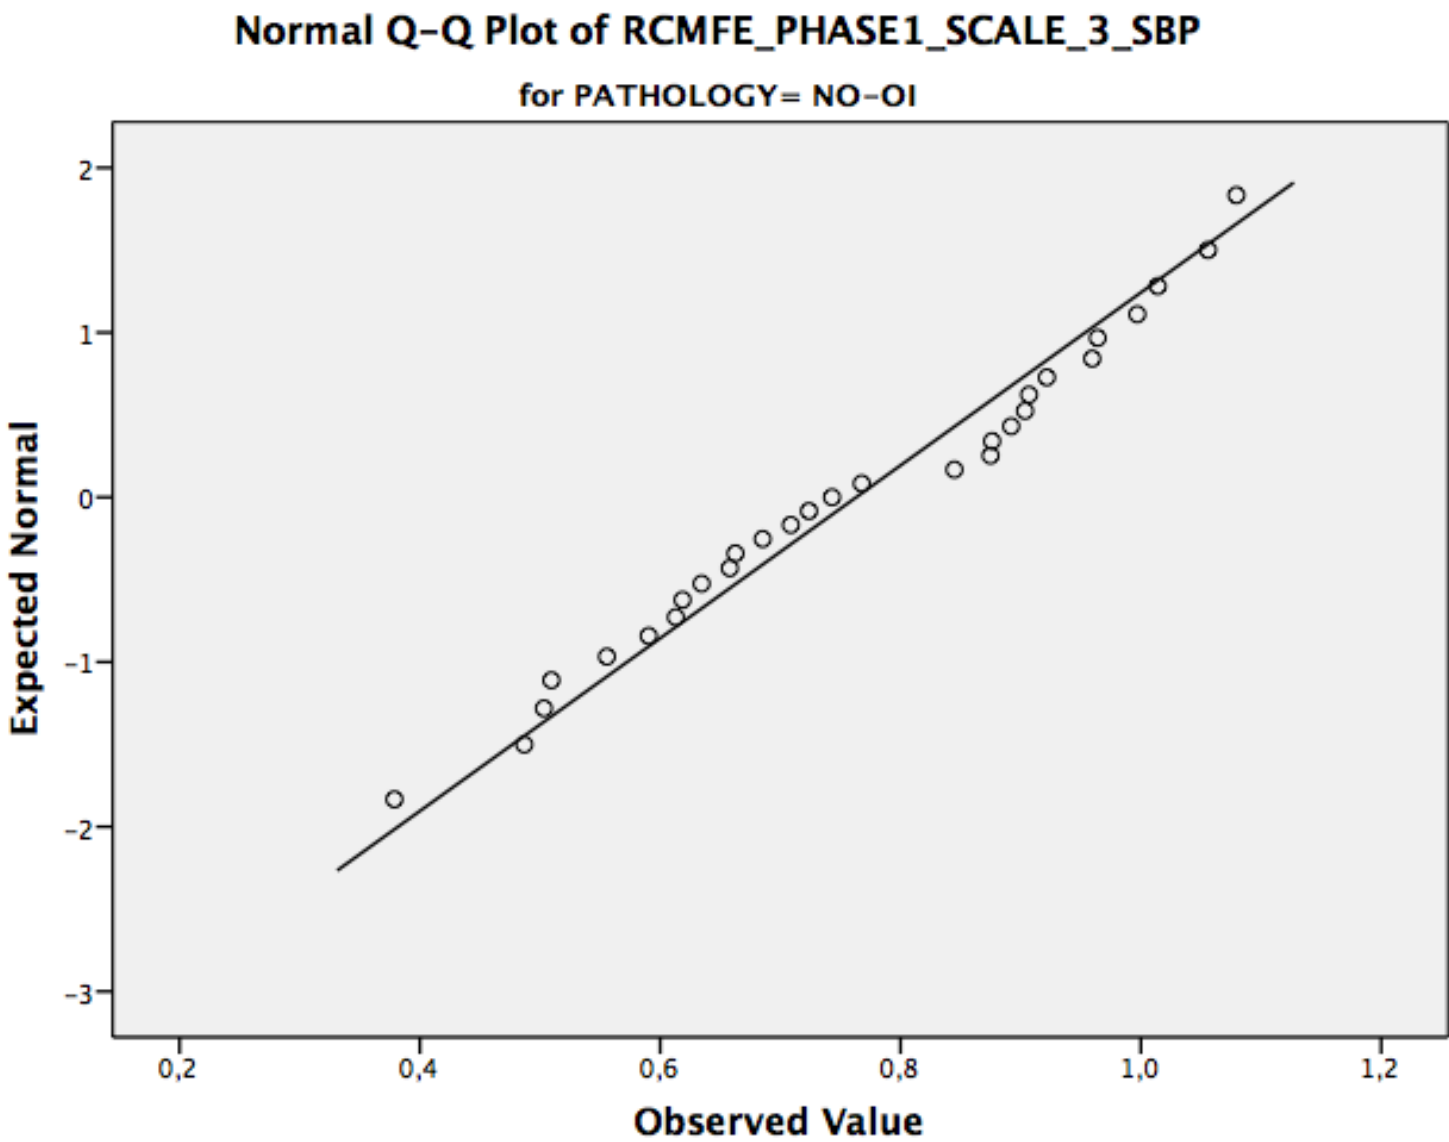

# Normal Q-Q Plot of RCMFE\_PHASE1\_SCALE\_3\_SBP

for PATHOLOGY= OI

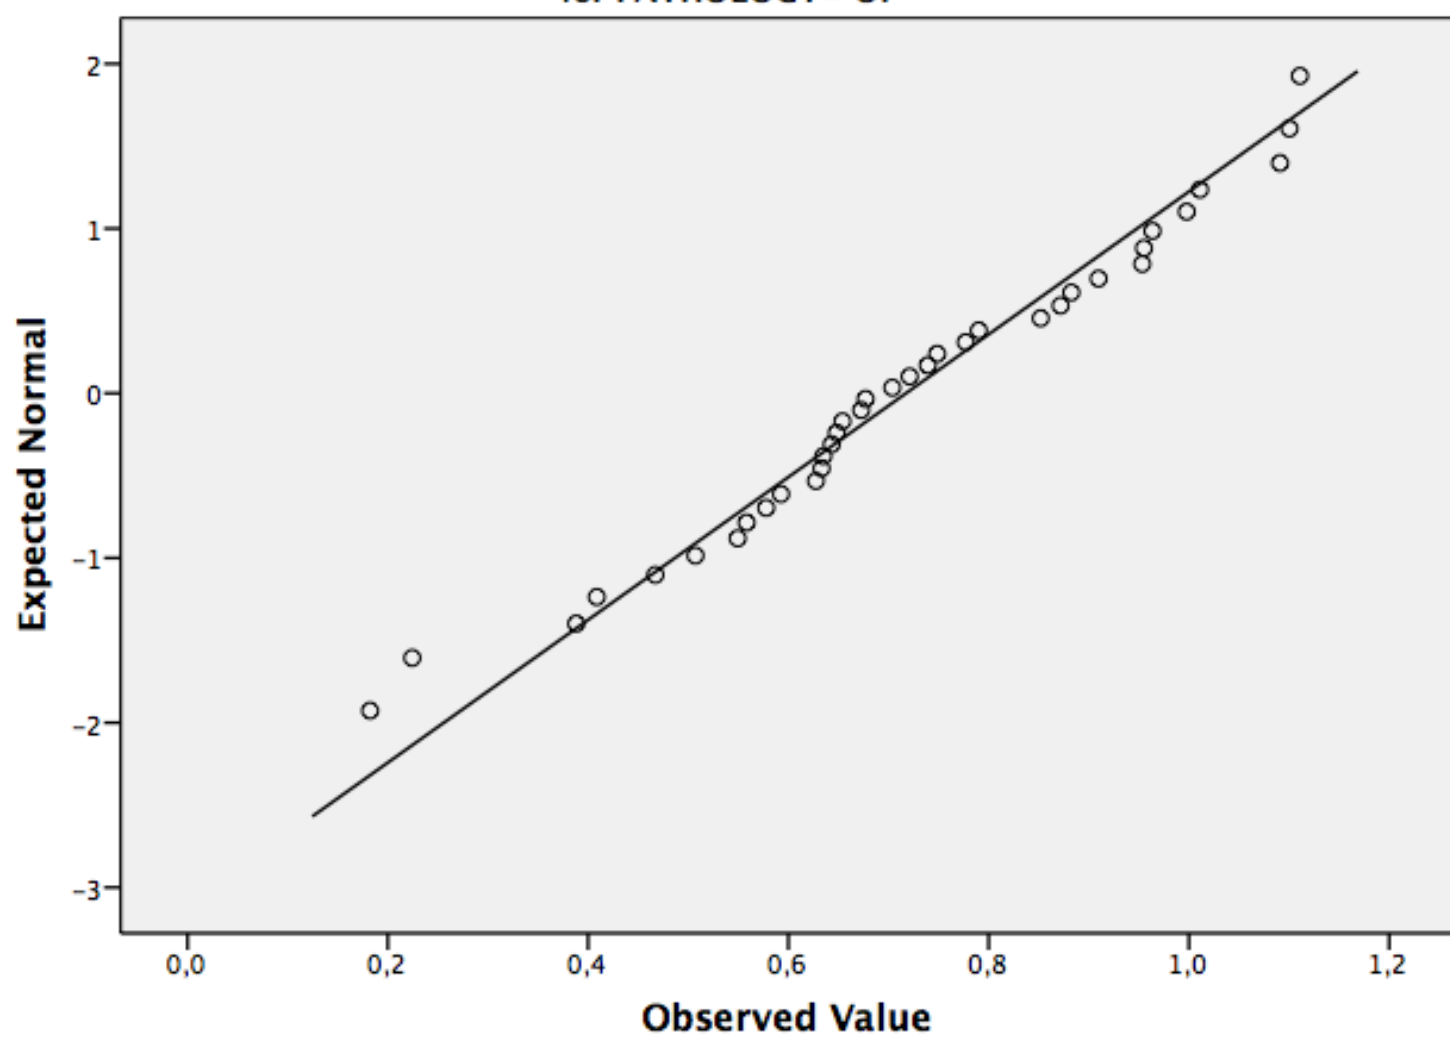

Normal Q-Q Plots

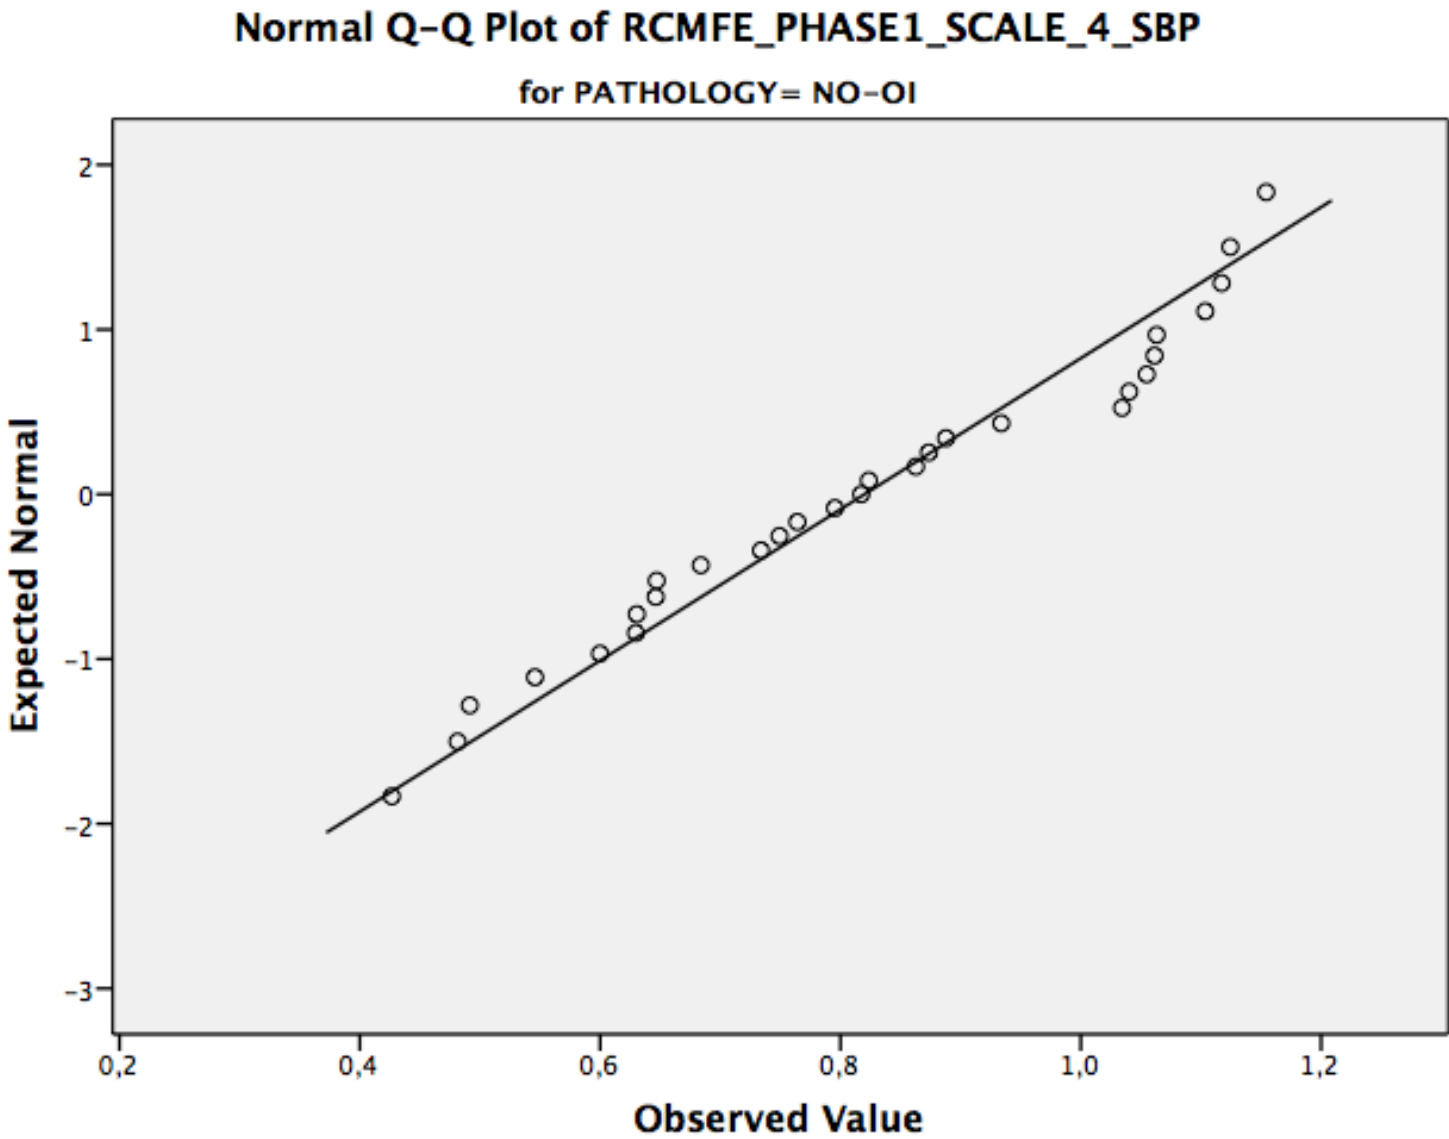

# Normal Q-Q Plot of RCMFE\_PHASE1\_SCALE\_4\_SBP

for PATHOLOGY= OI

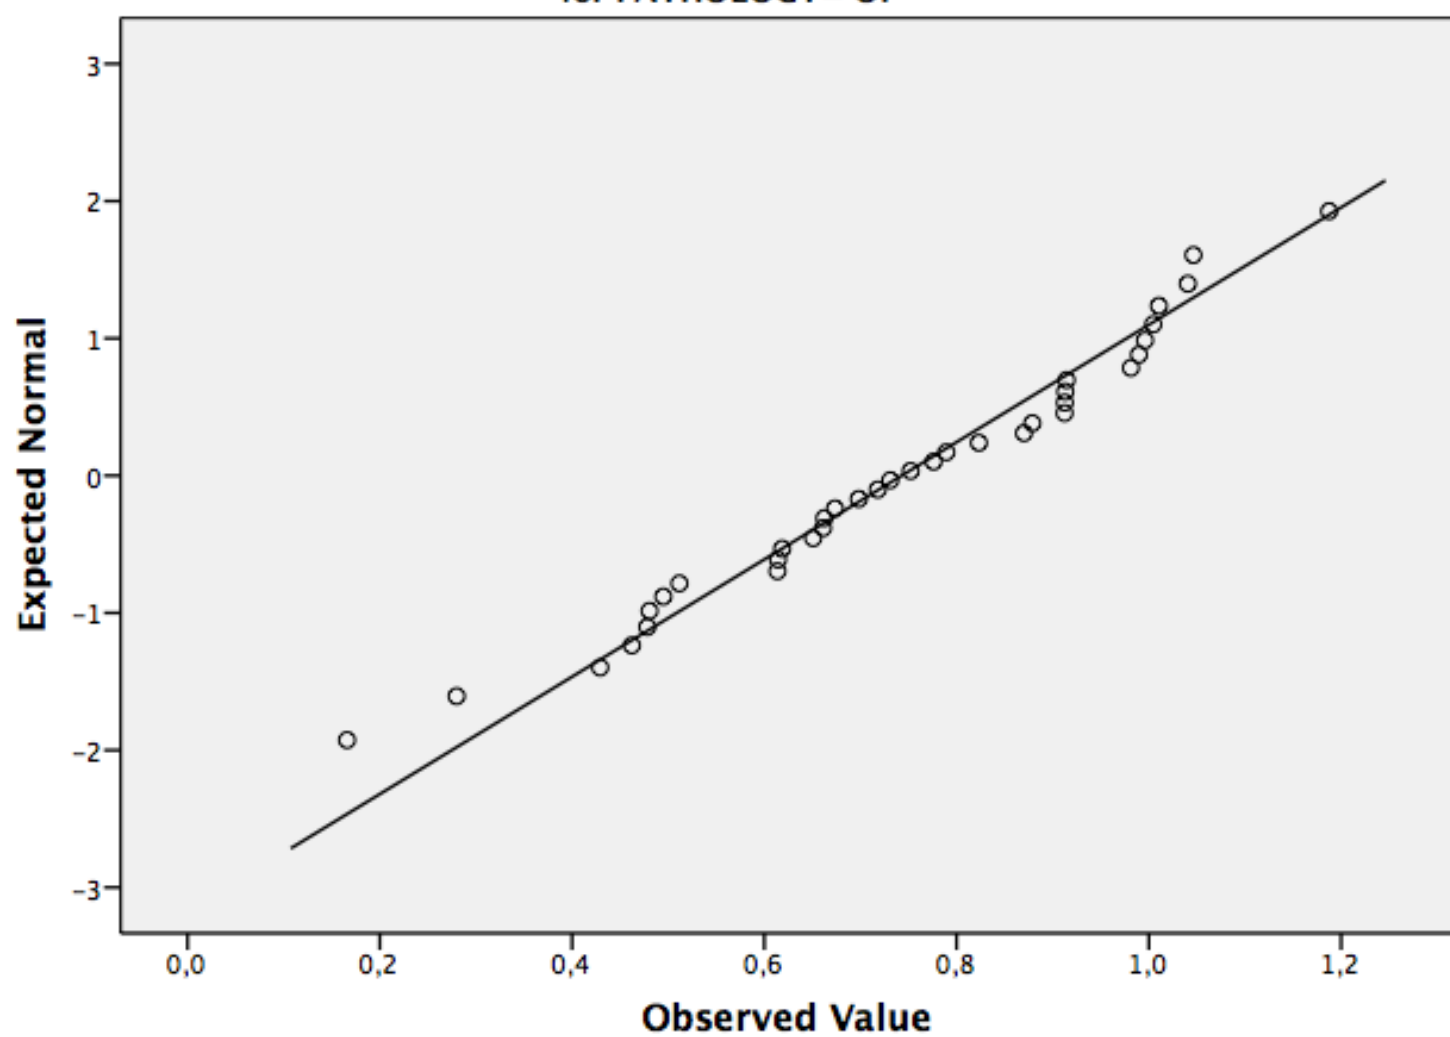

Normal Q-Q Plots

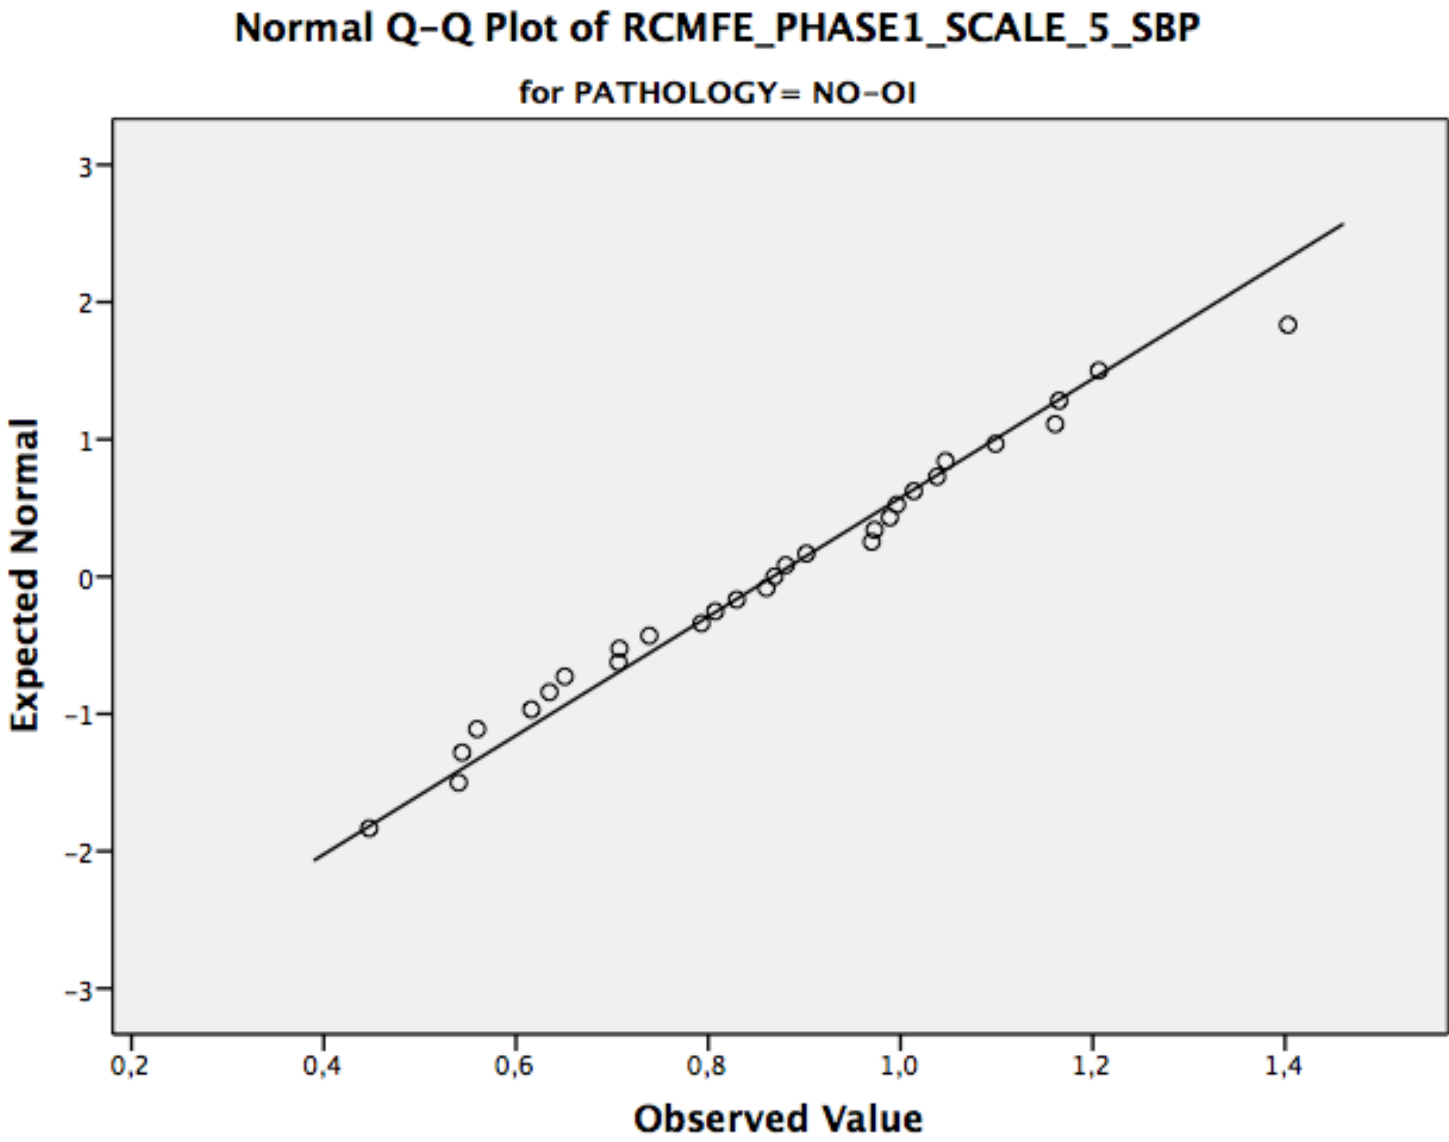

# Normal Q-Q Plot of RCMFE\_PHASE1\_SCALE\_5\_SBP

for PATHOLOGY= OI

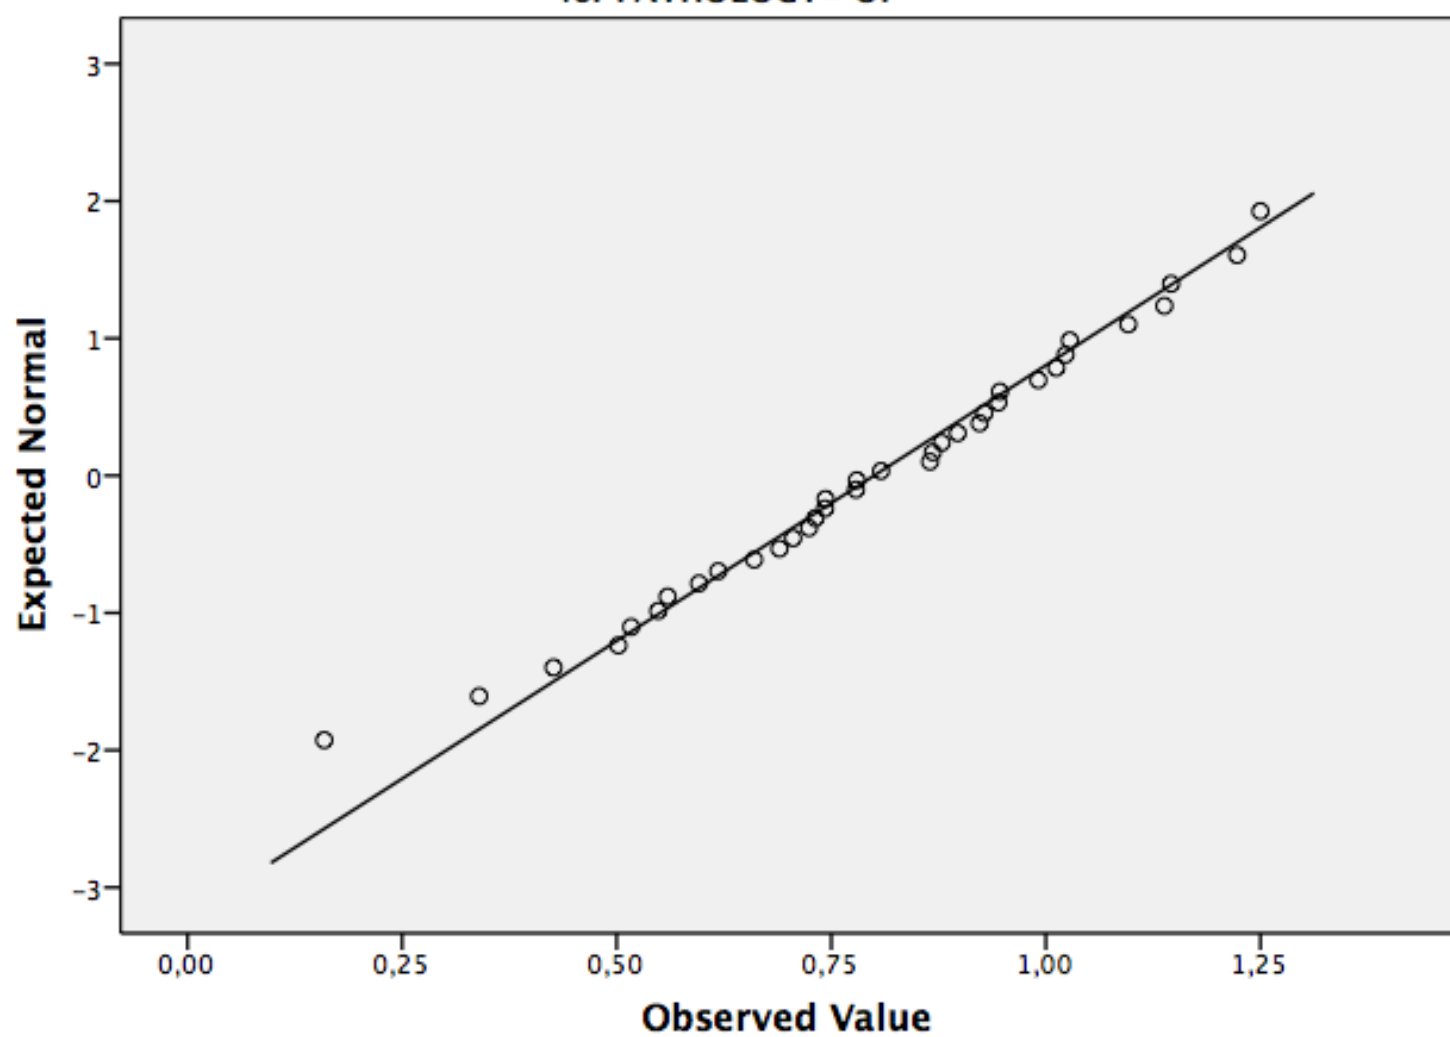

Normal Q-Q Plots

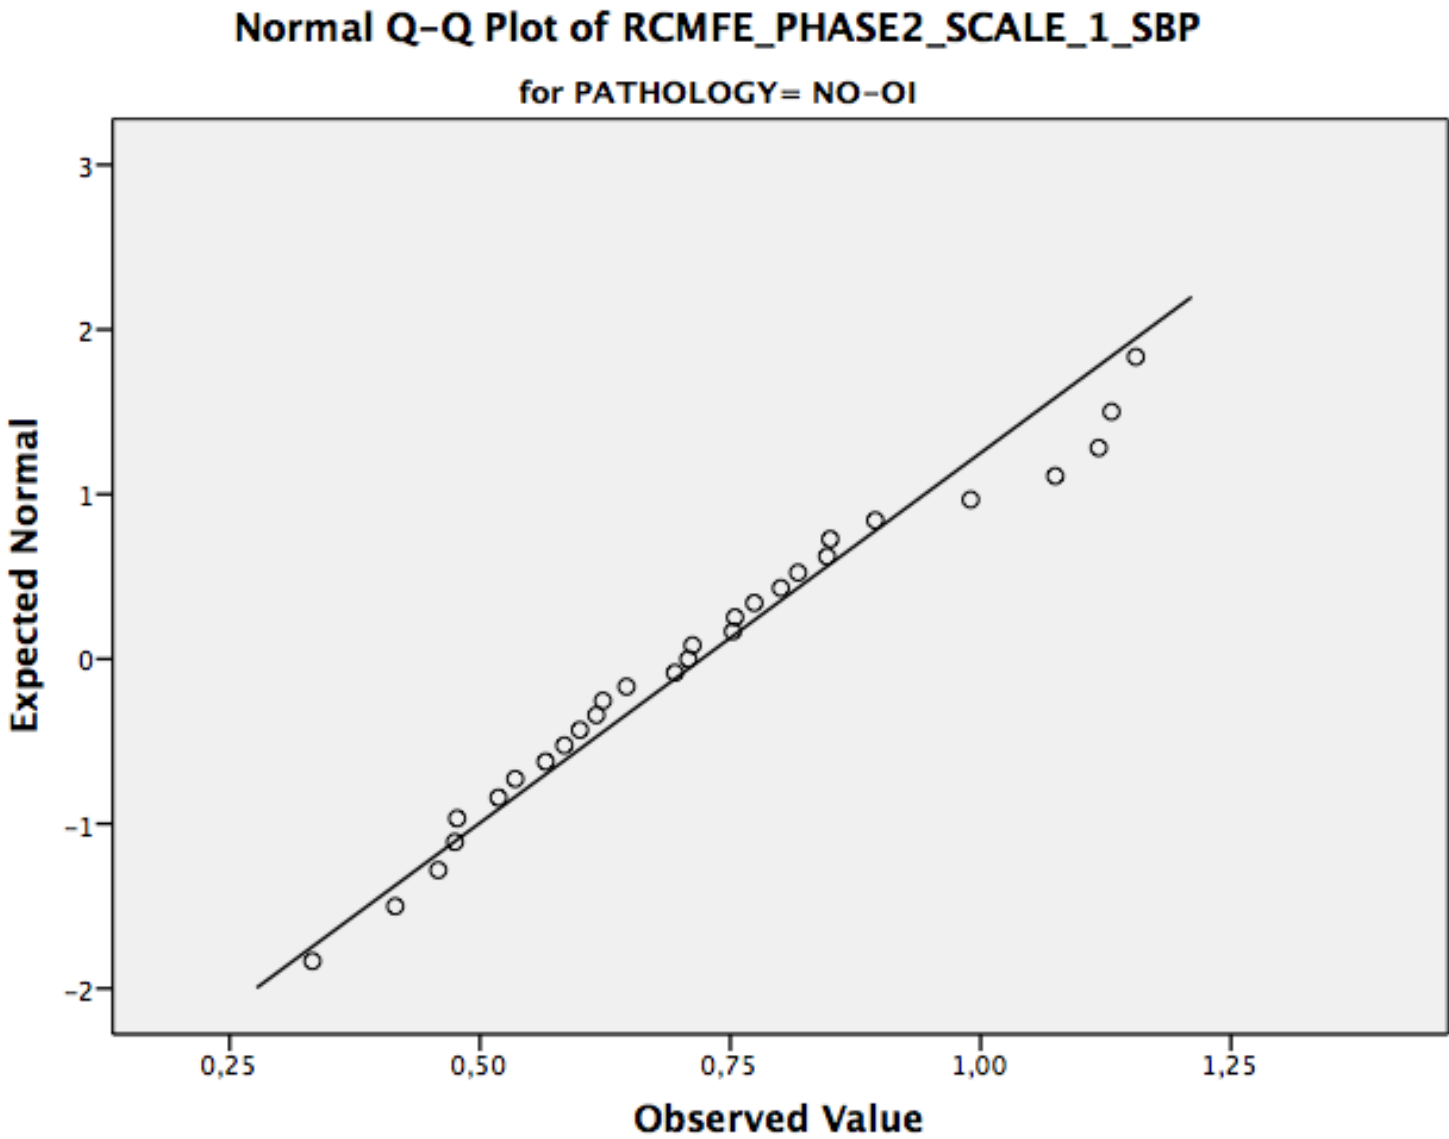

# Normal Q-Q Plot of RCMFE\_PHASE2\_SCALE\_1\_SBP

for PATHOLOGY= OI

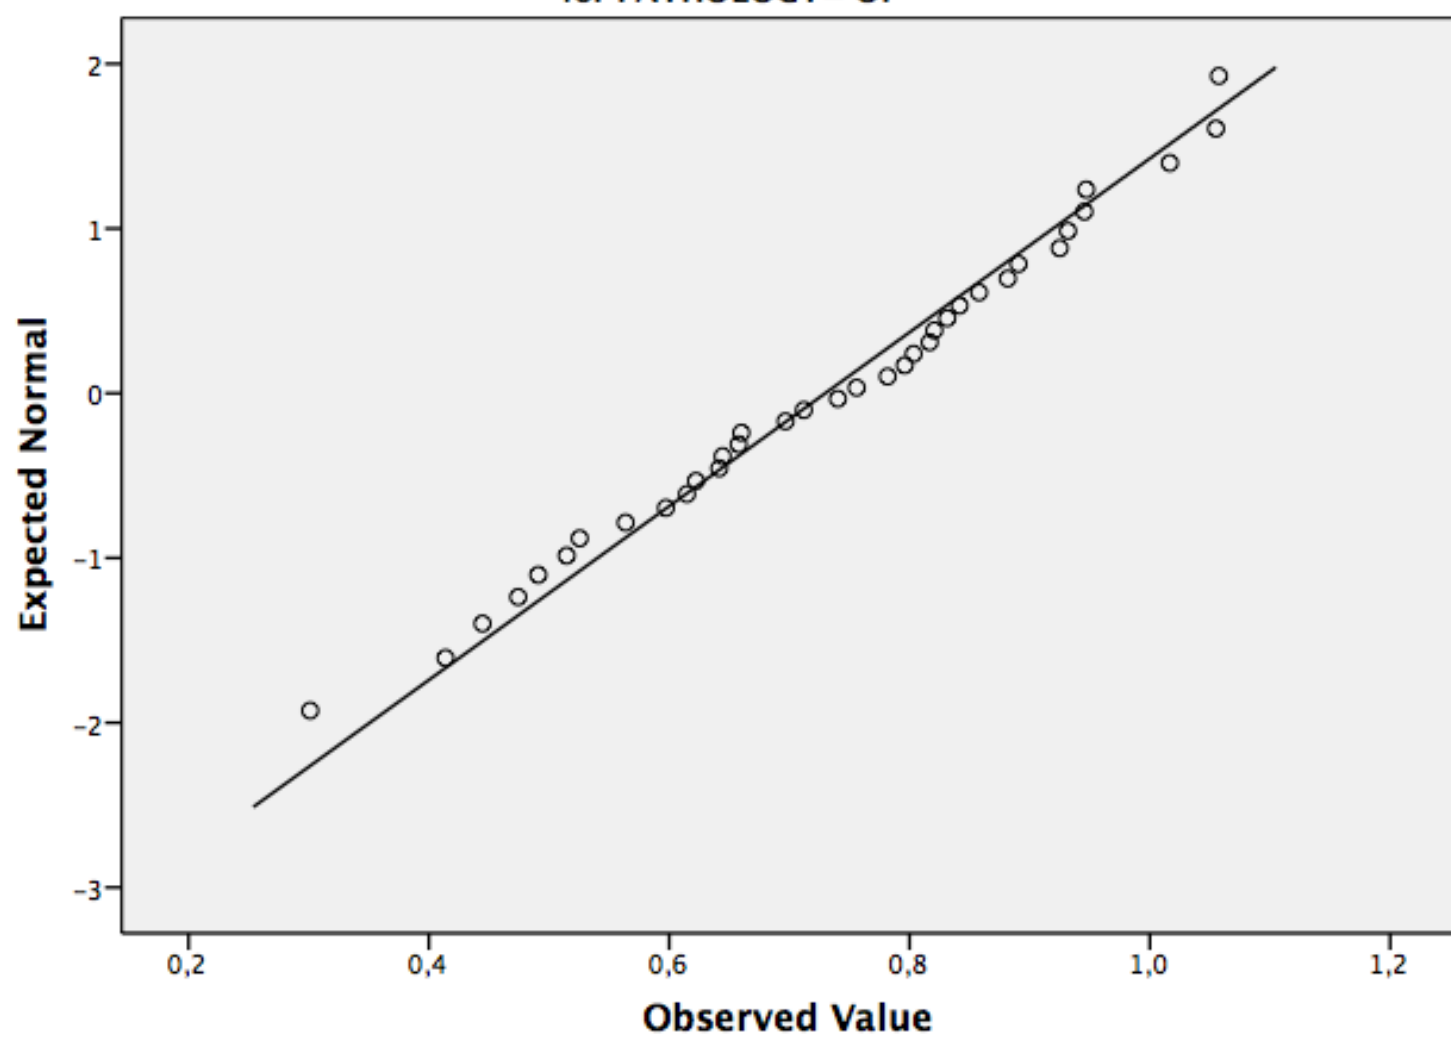



Normal Q-Q Plots

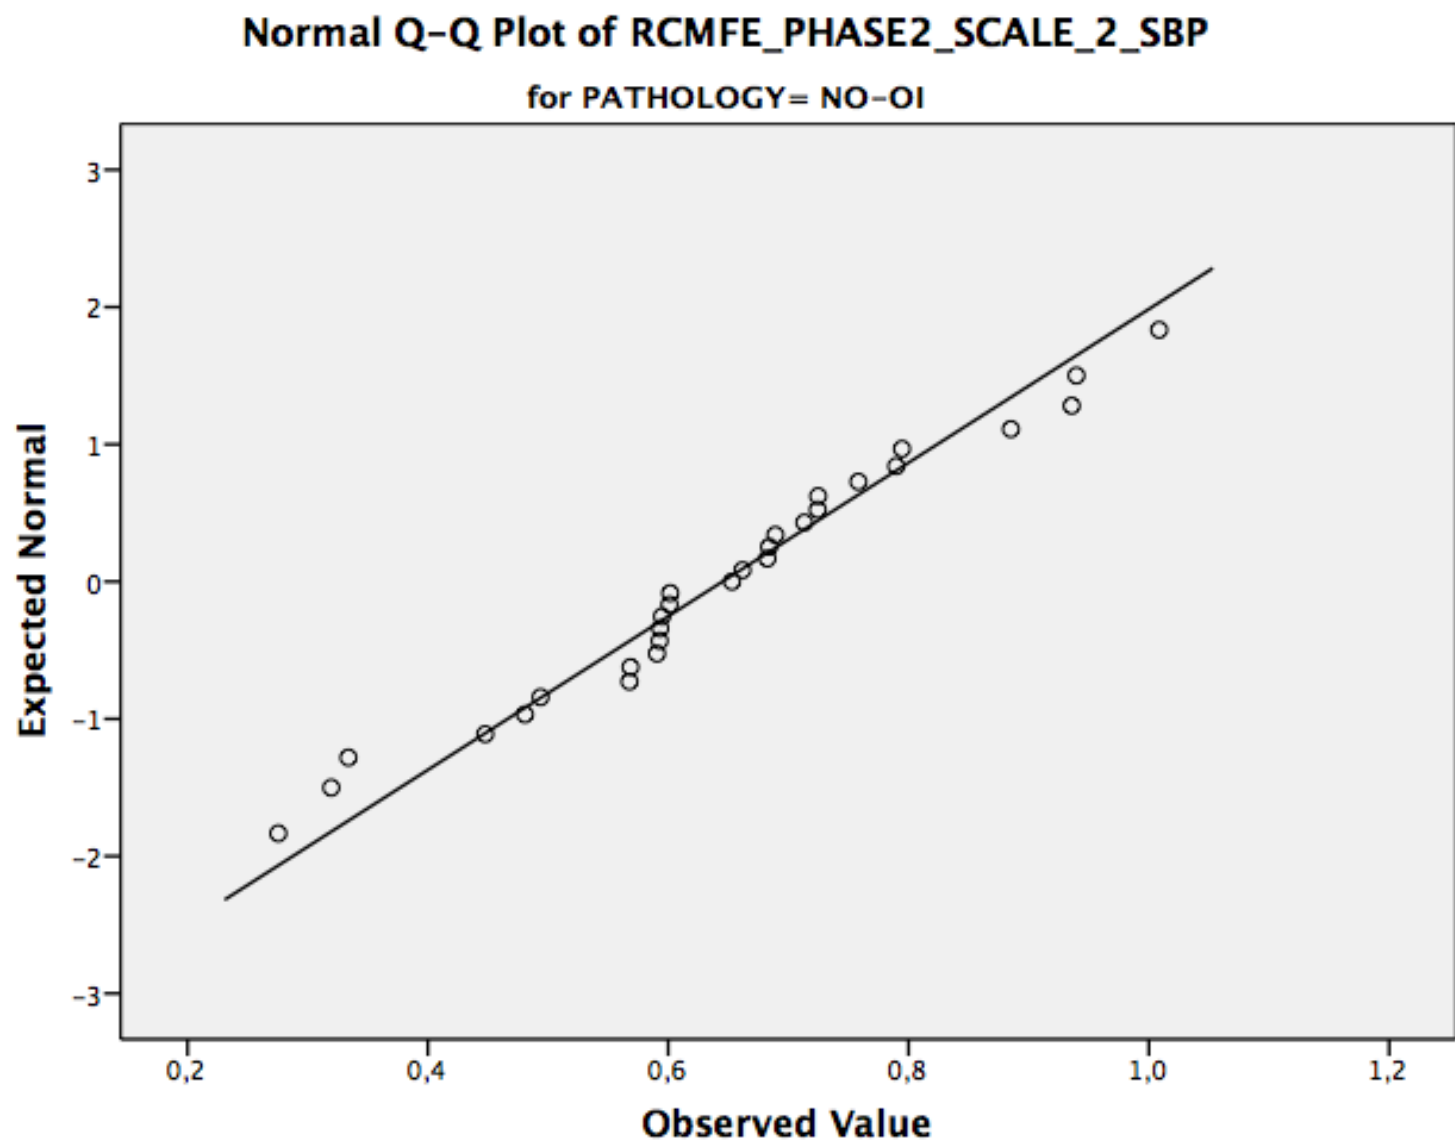

# Normal Q-Q Plot of RCMFE\_PHASE2\_SCALE\_2\_SBP

for PATHOLOGY= OI

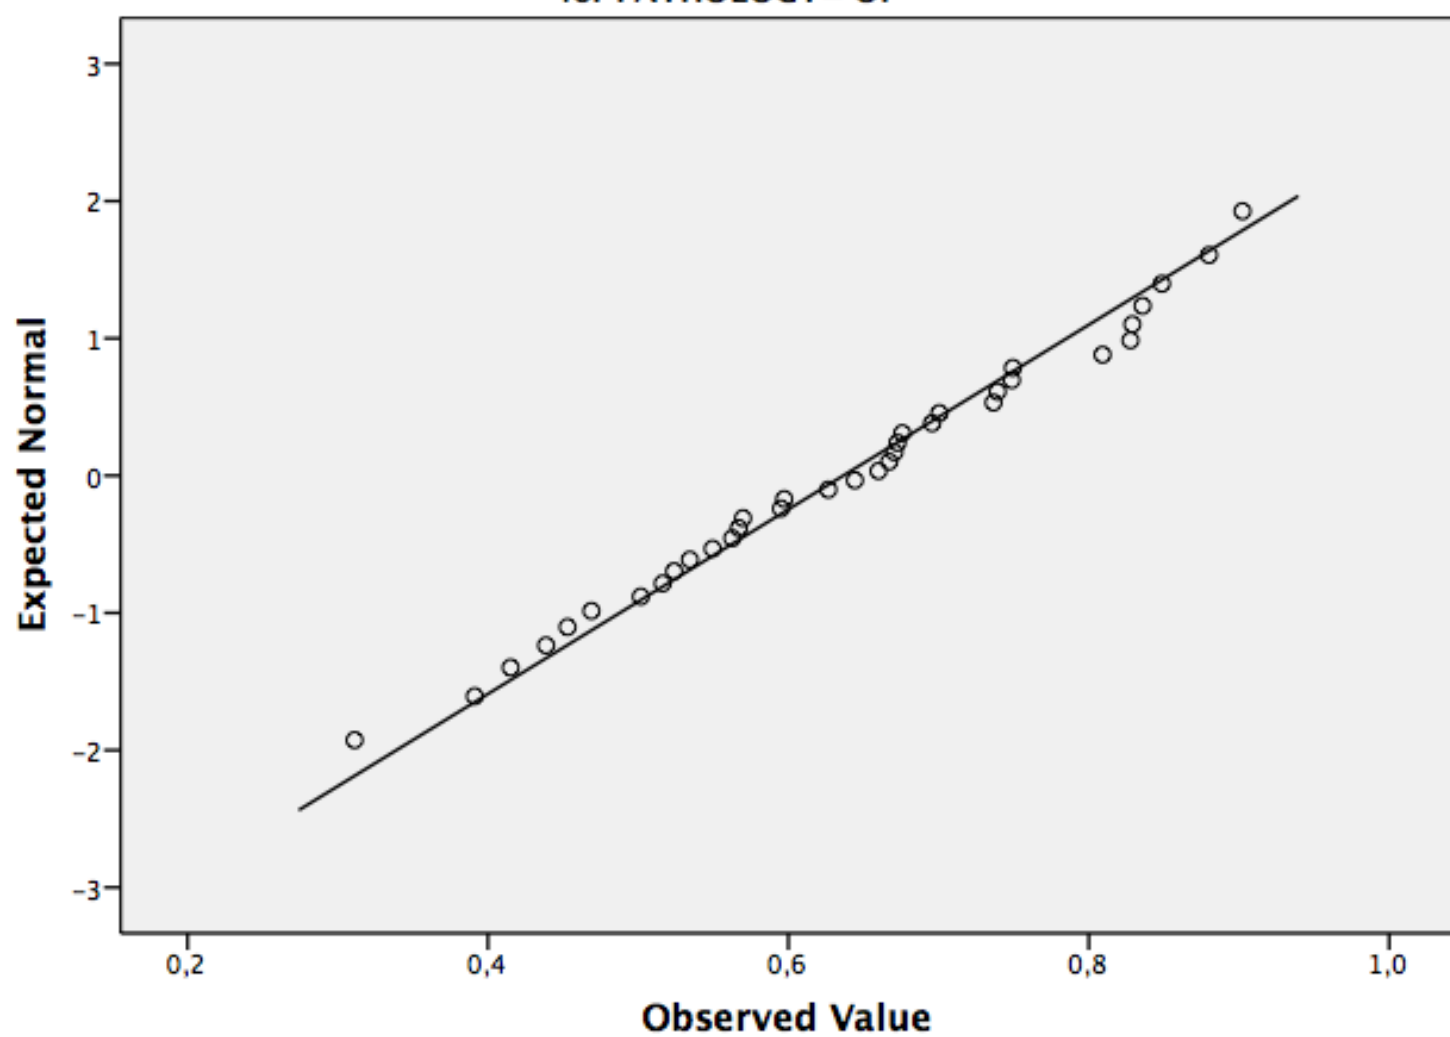

Normal Q-Q Plots

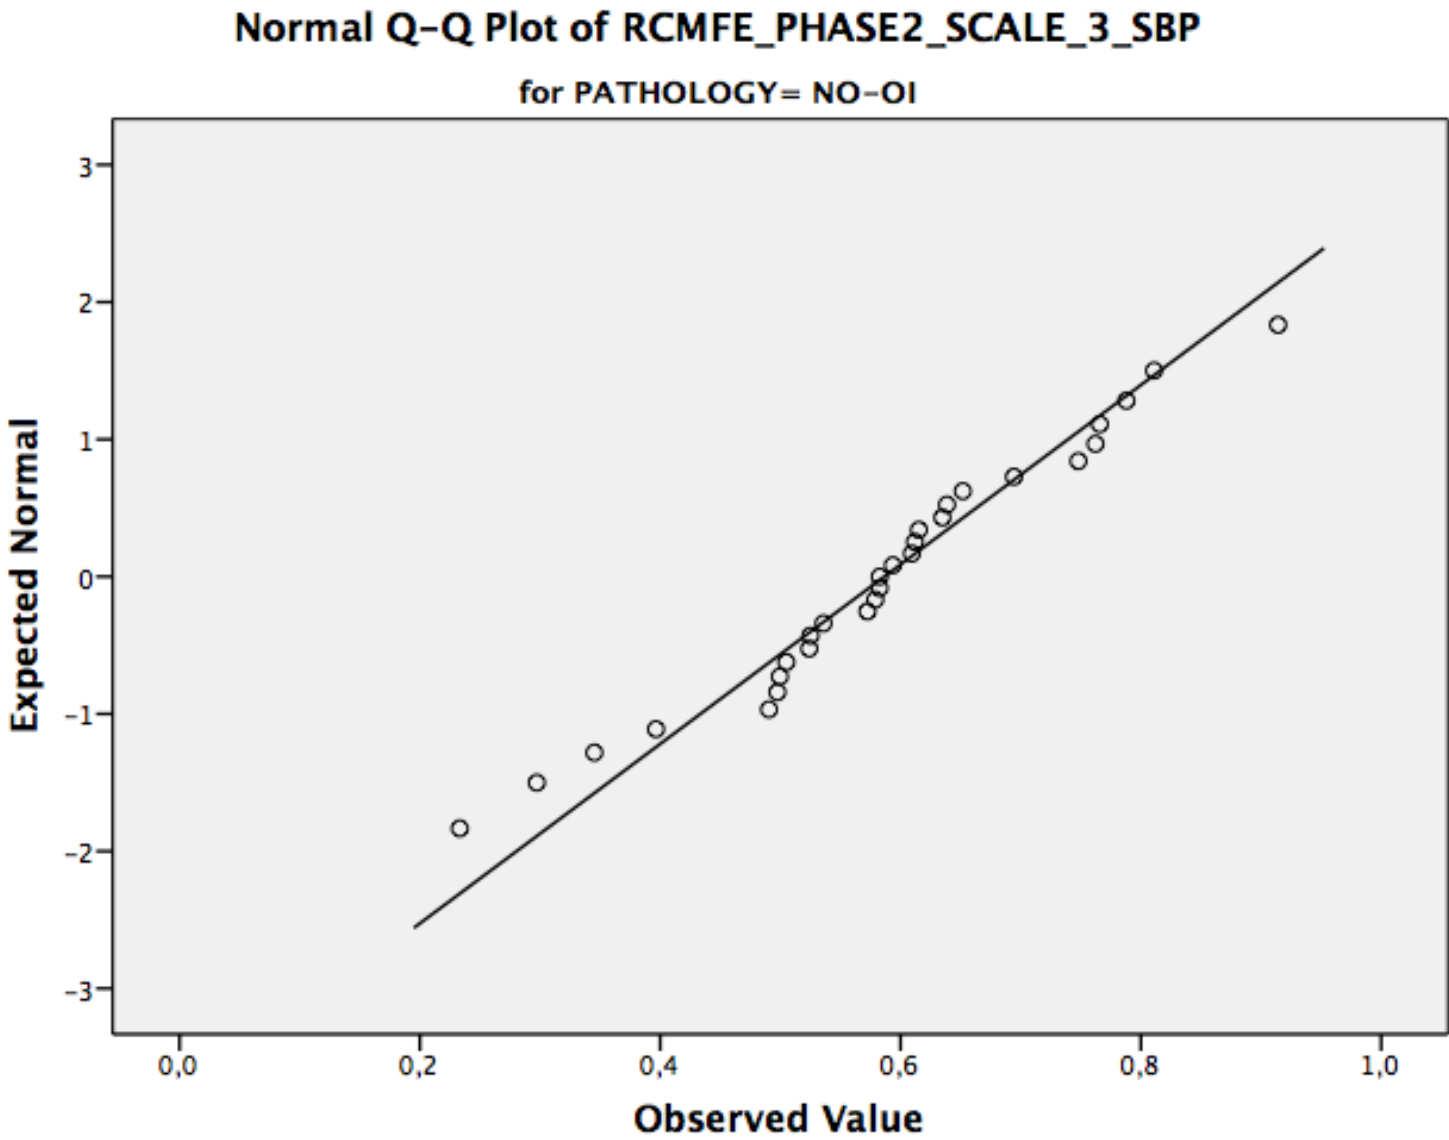

# Normal Q-Q Plot of RCMFE\_PHASE2\_SCALE\_3\_SBP

for PATHOLOGY= OI

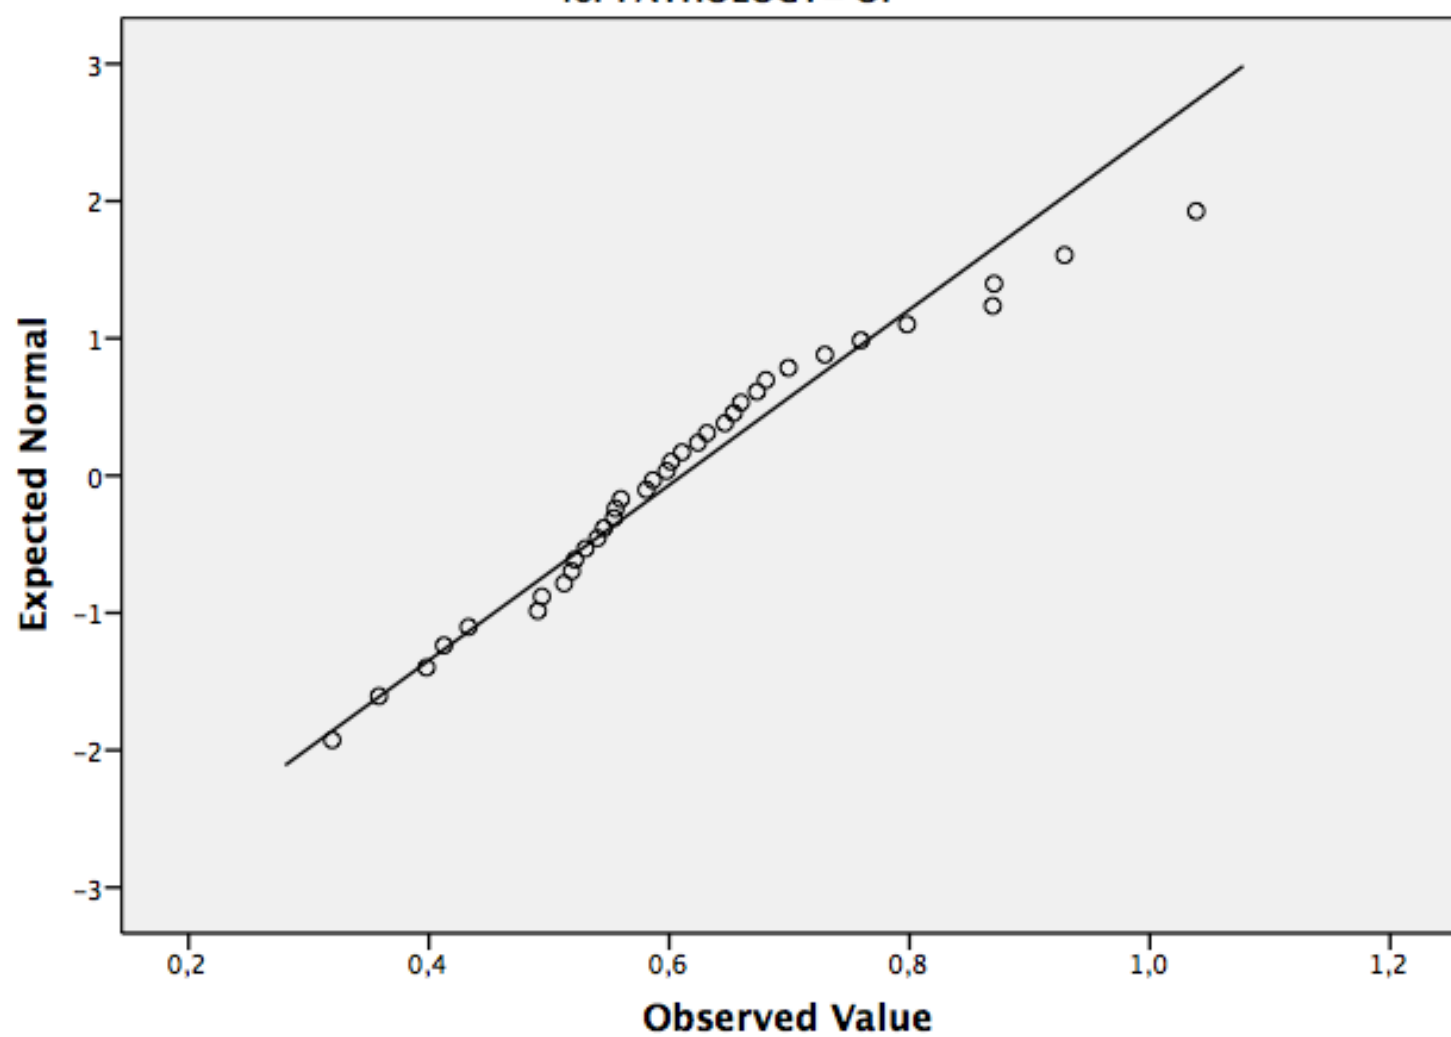

Normal Q-Q Plots

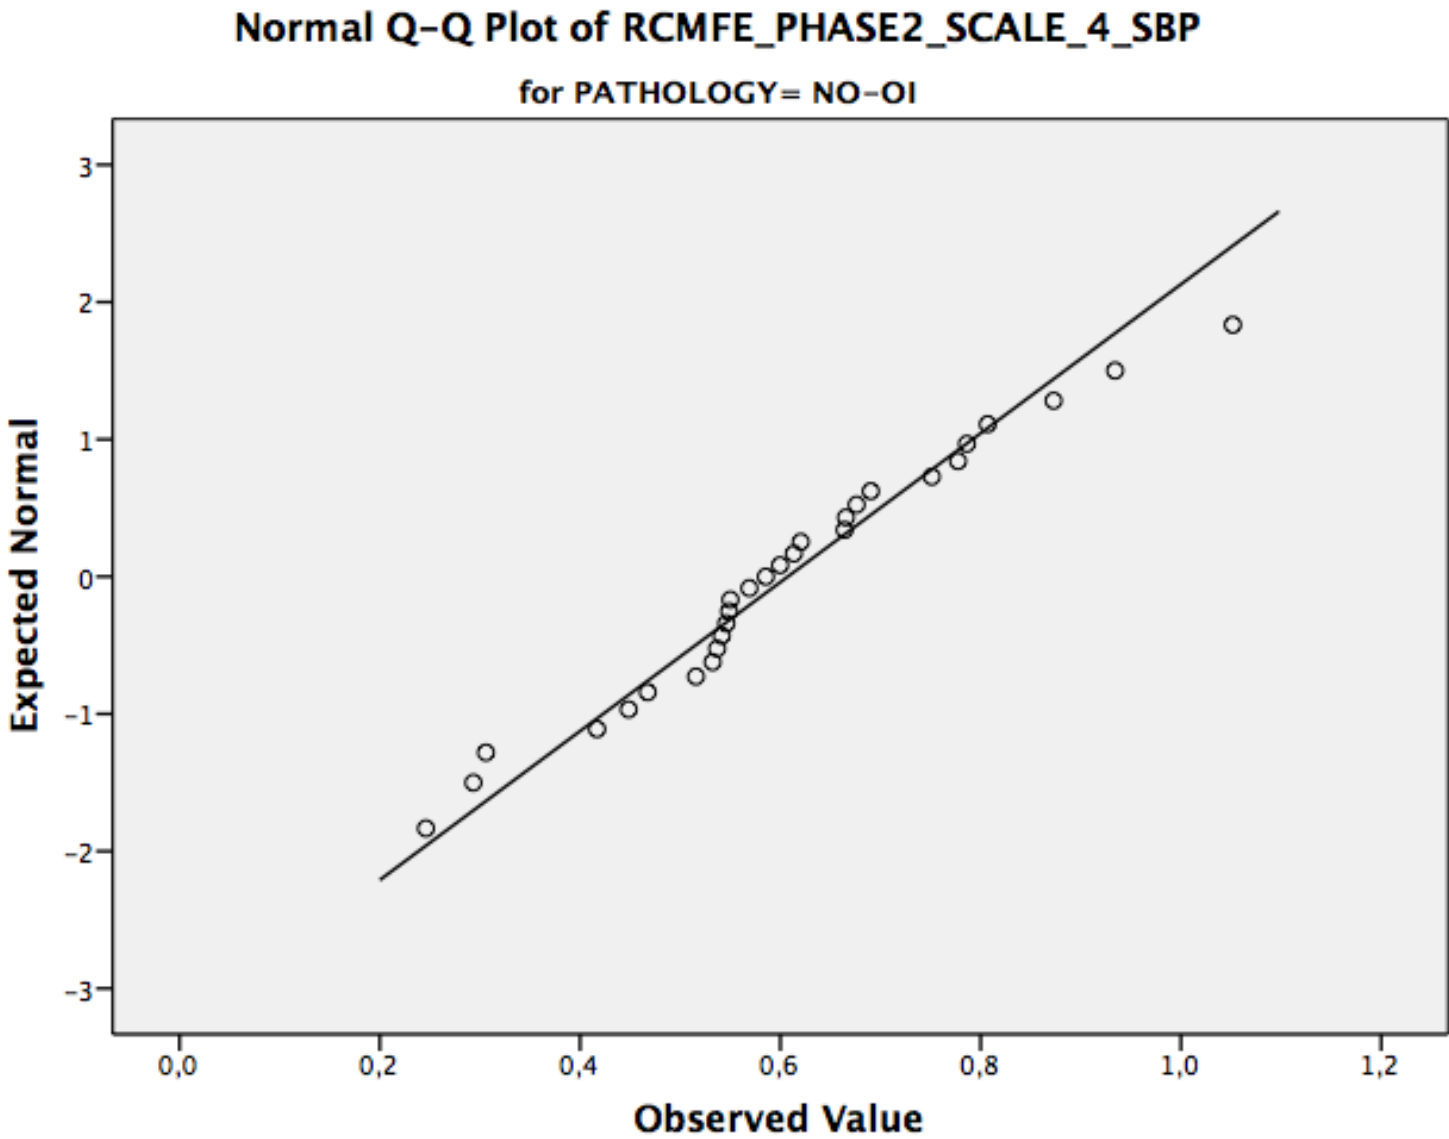

# Normal Q-Q Plot of RCMFE\_PHASE2\_SCALE\_4\_SBP

for PATHOLOGY= OI

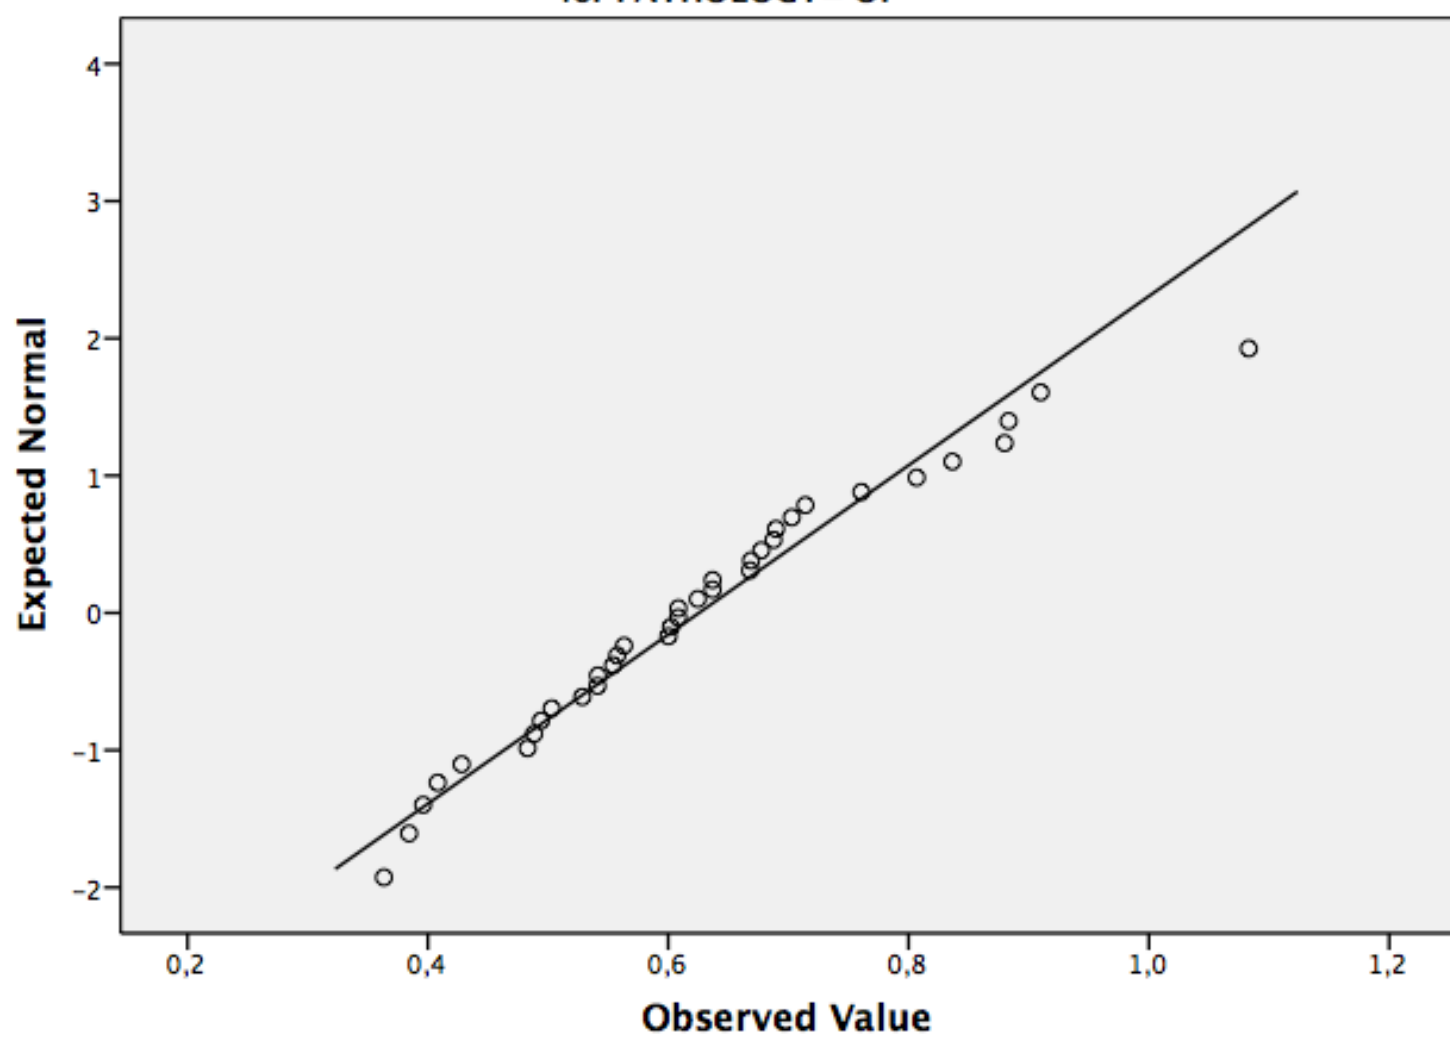

Normal Q-Q Plots

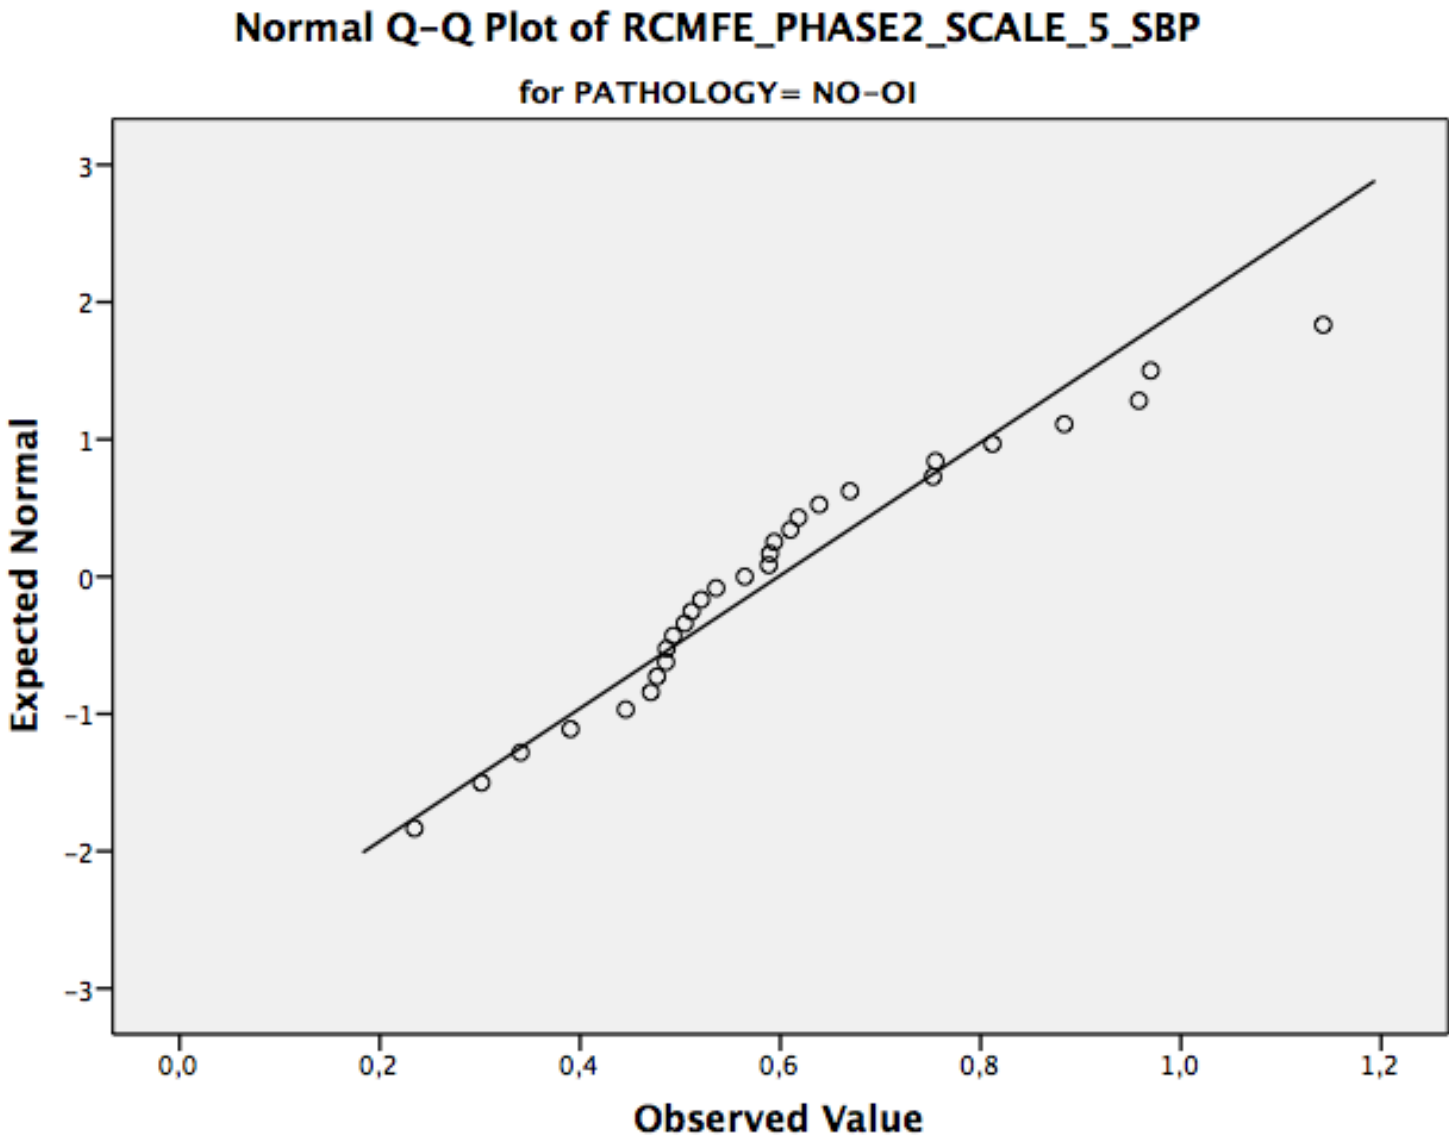

# Normal Q-Q Plot of RCMFE\_PHASE2\_SCALE\_5\_SBP

for PATHOLOGY= OI

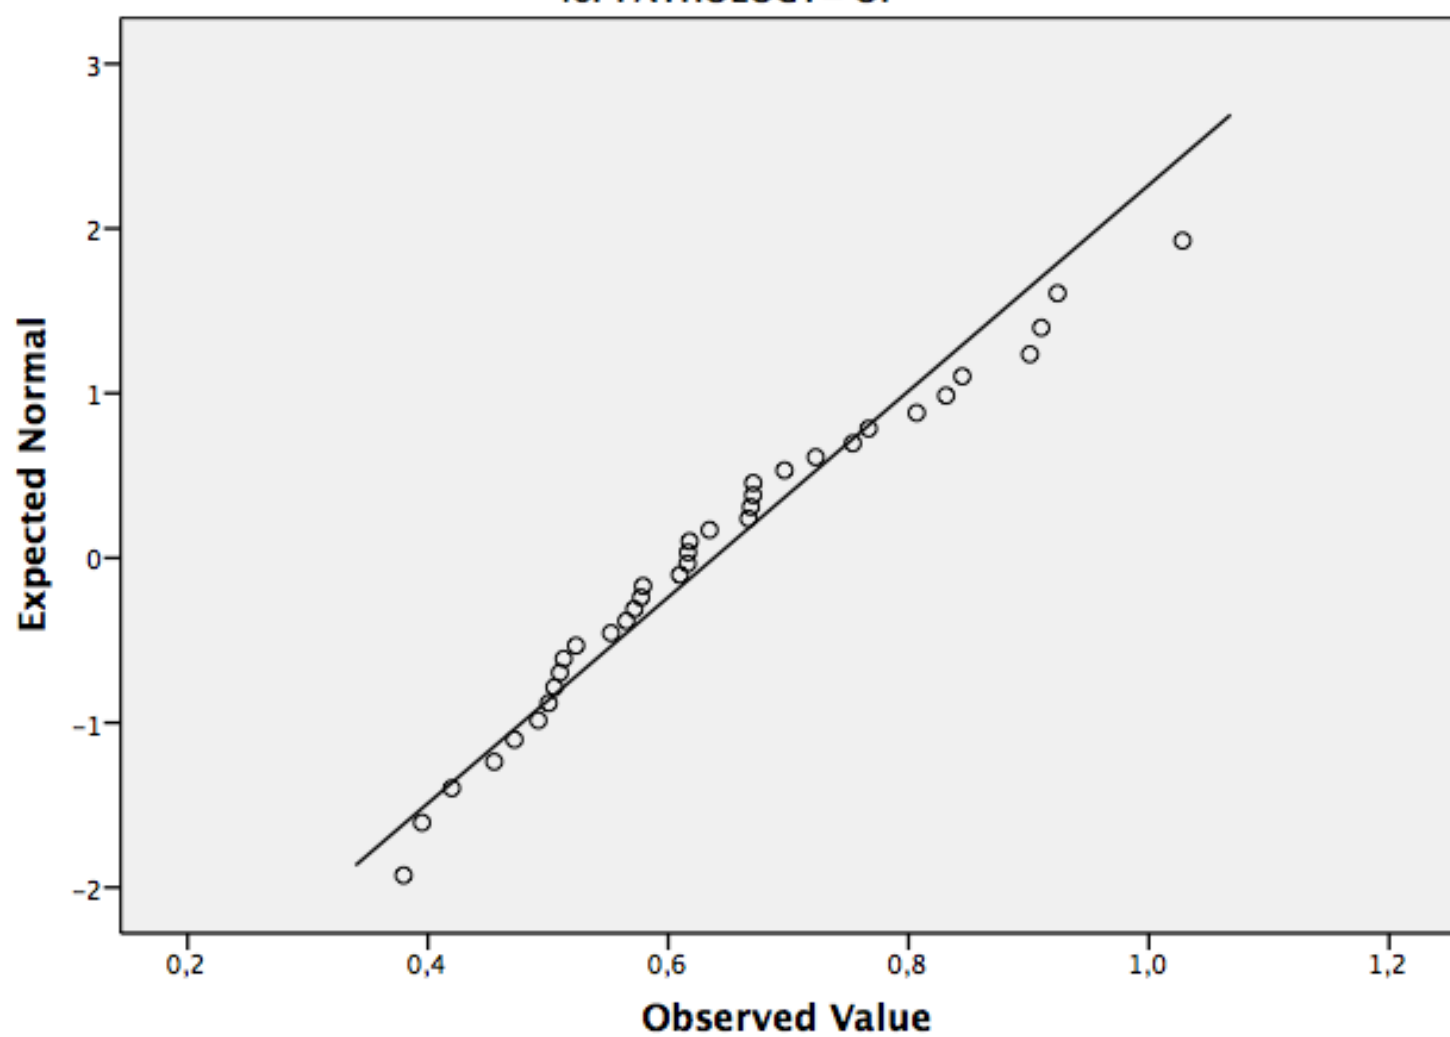



Normal Q-Q Plots

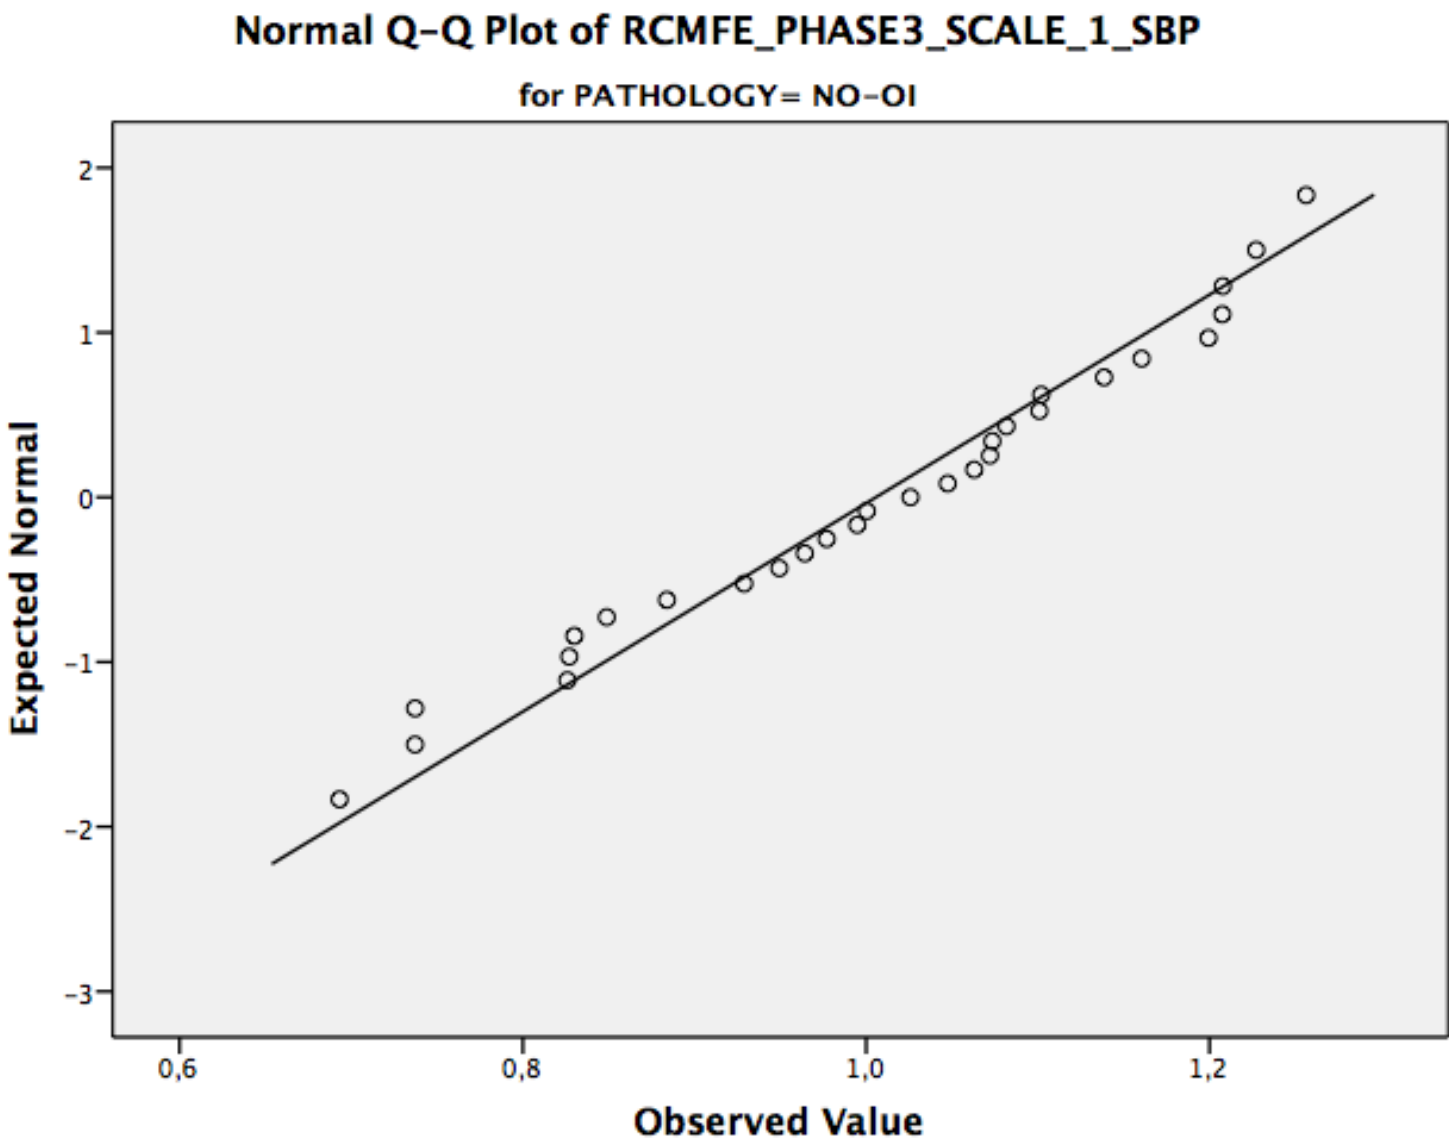

# Normal Q-Q Plot of RCMFE\_PHASE3\_SCALE\_1\_SBP

for PATHOLOGY= OI

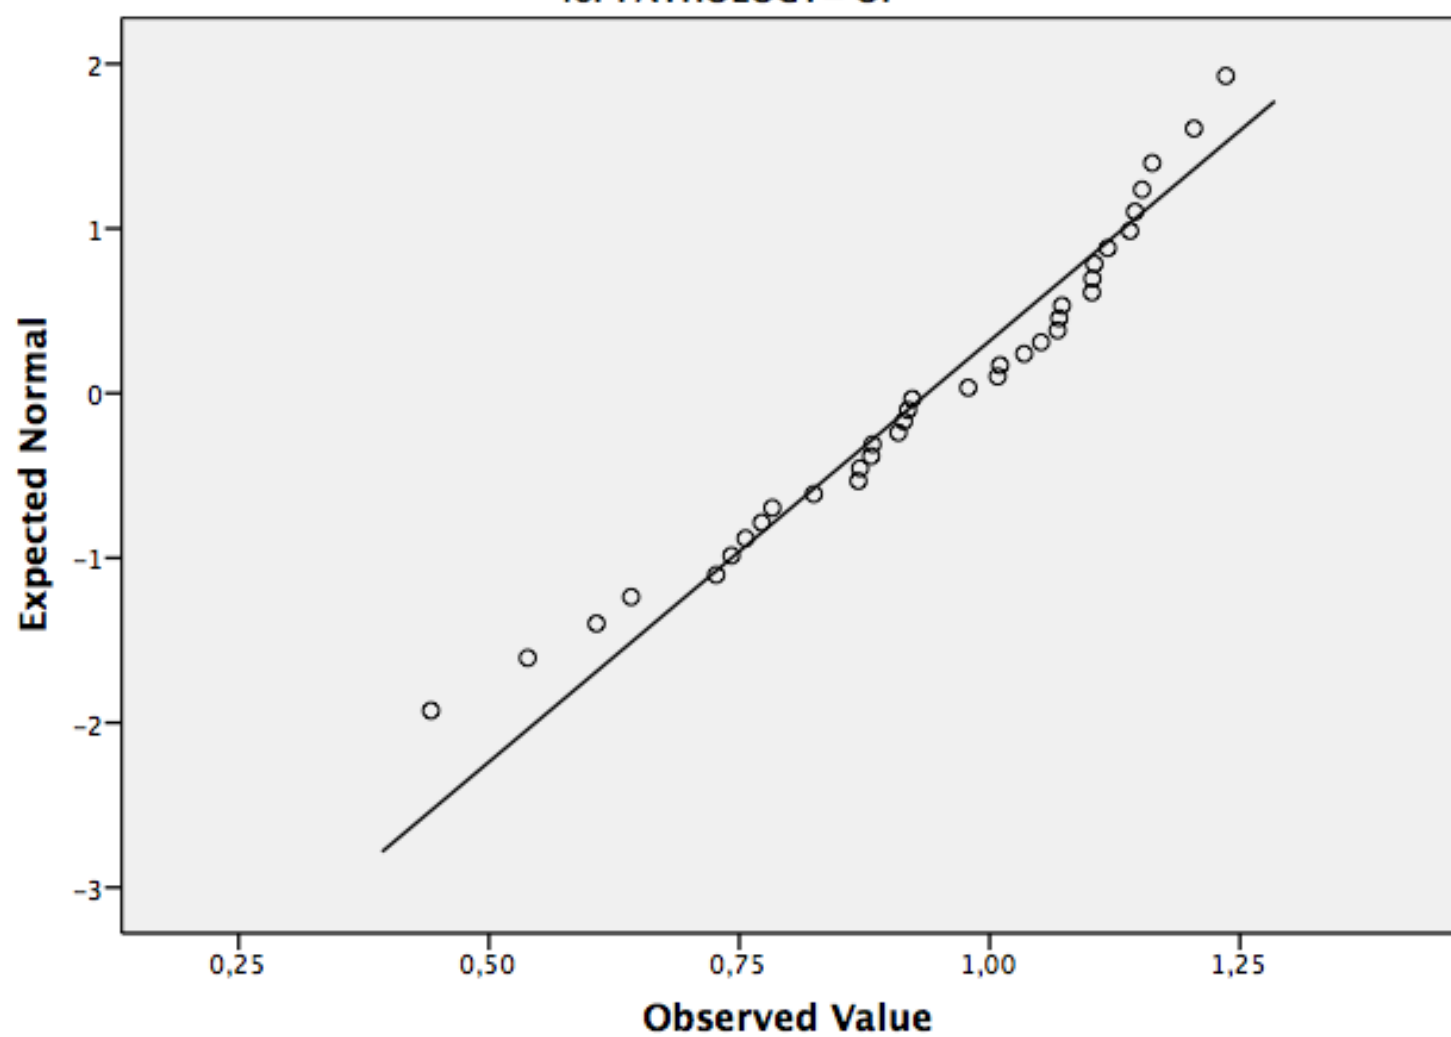

Normal Q-Q Plots

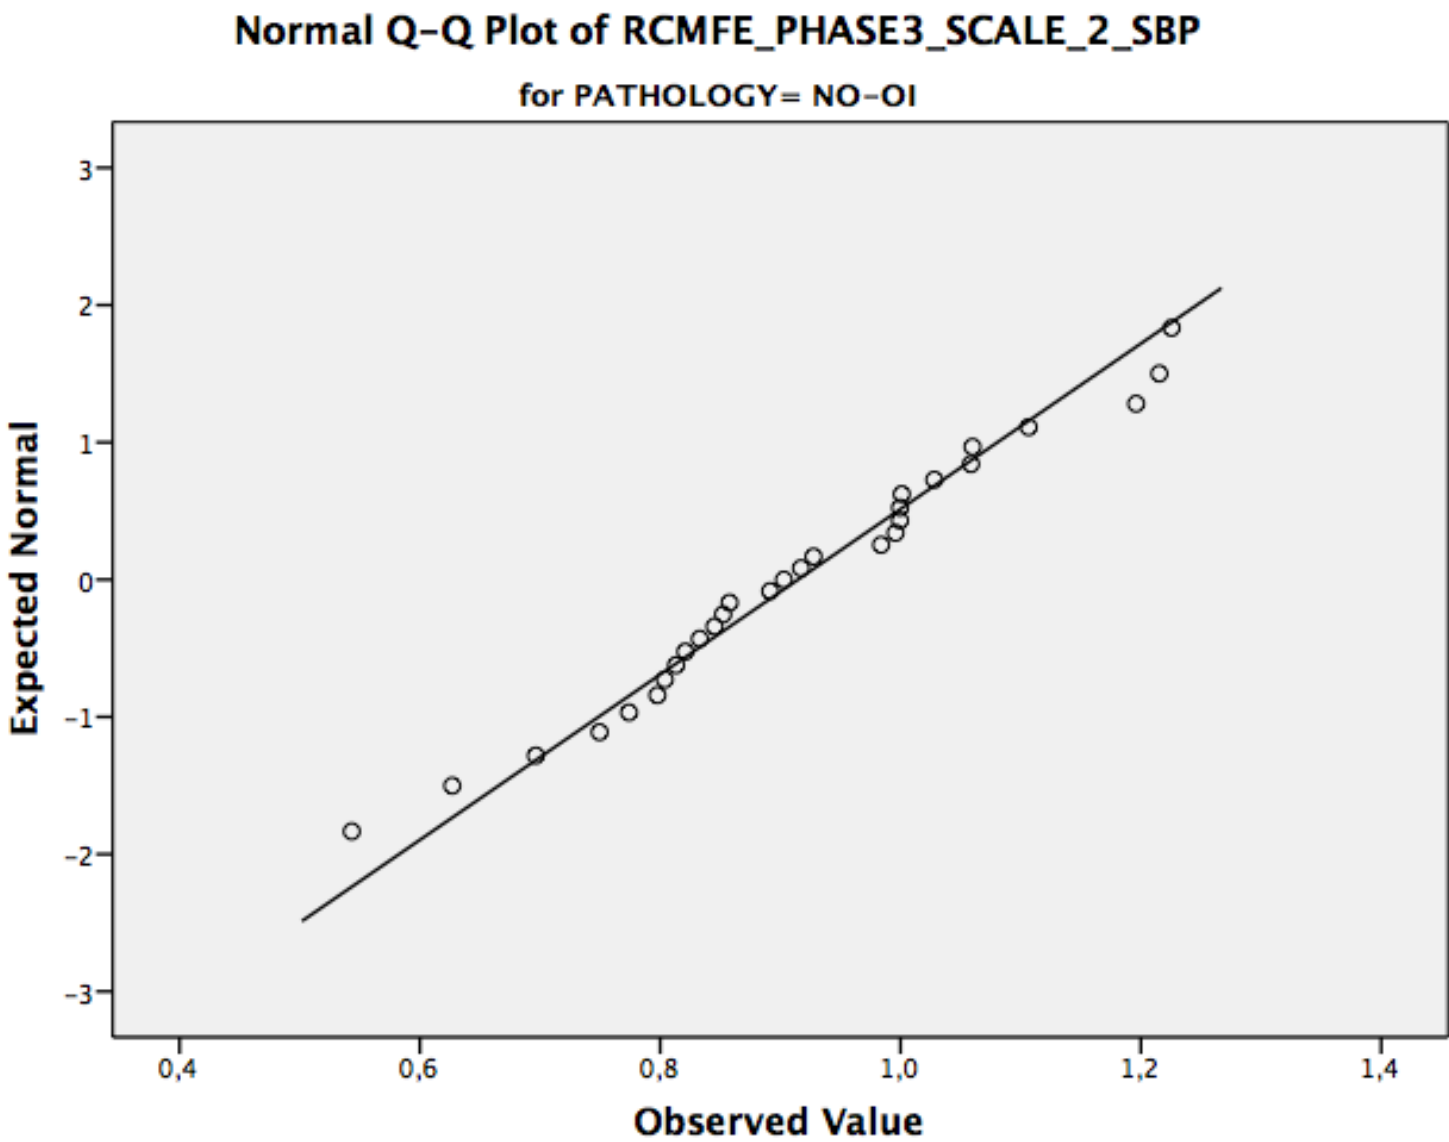

# Normal Q-Q Plot of RCMFE\_PHASE3\_SCALE\_2\_SBP

for PATHOLOGY= OI

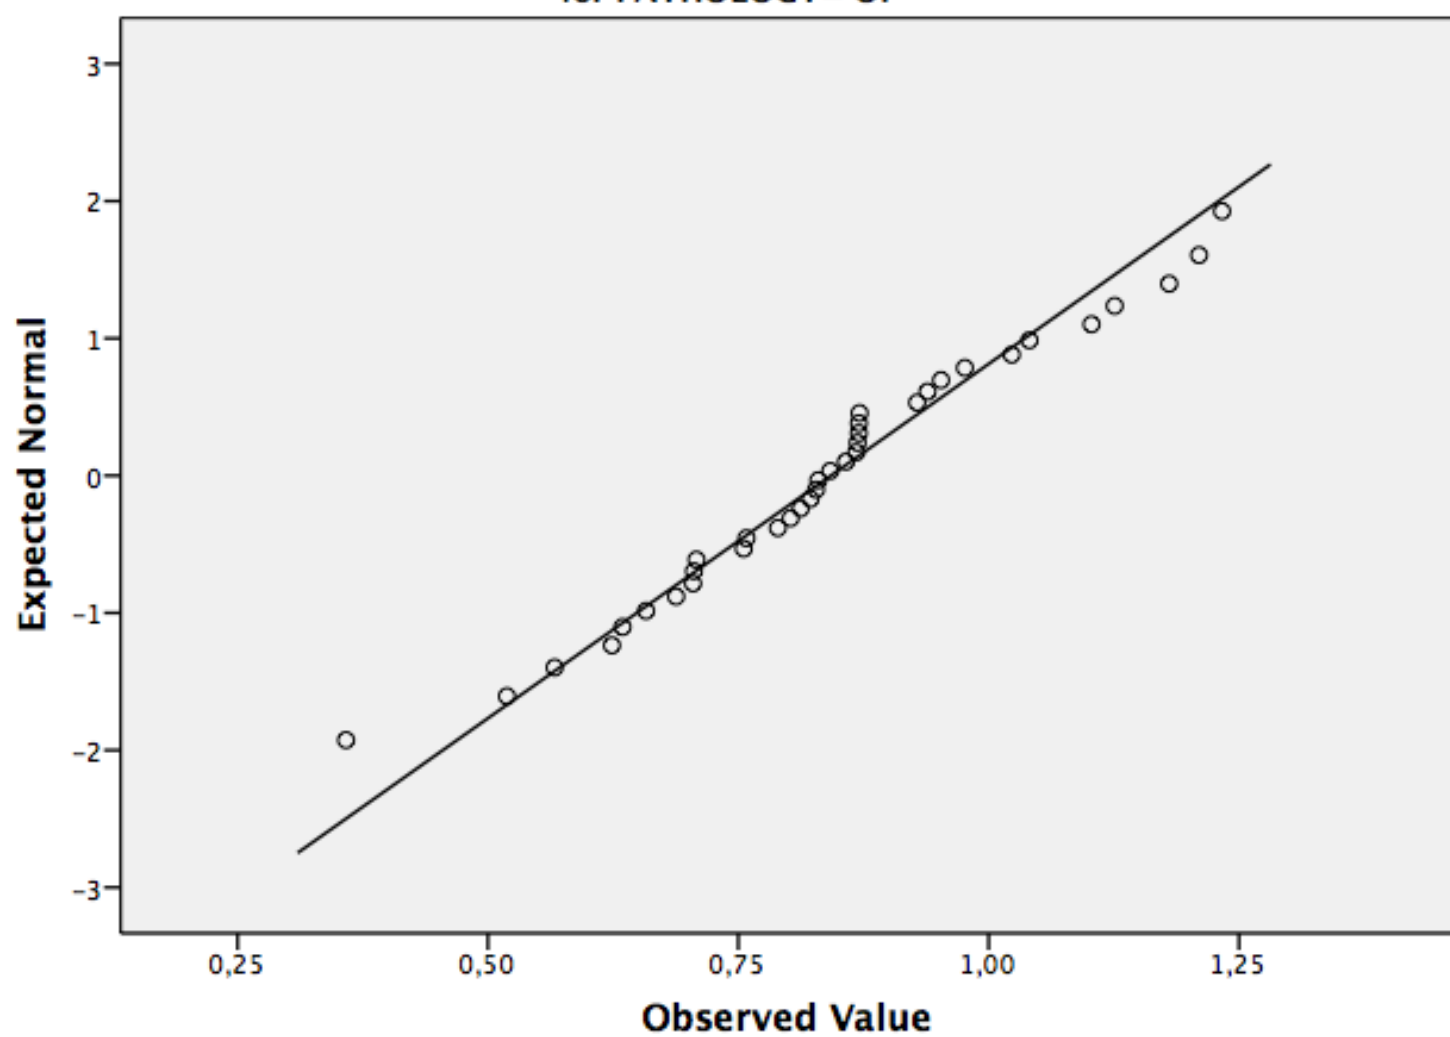

Normal Q-Q Plots

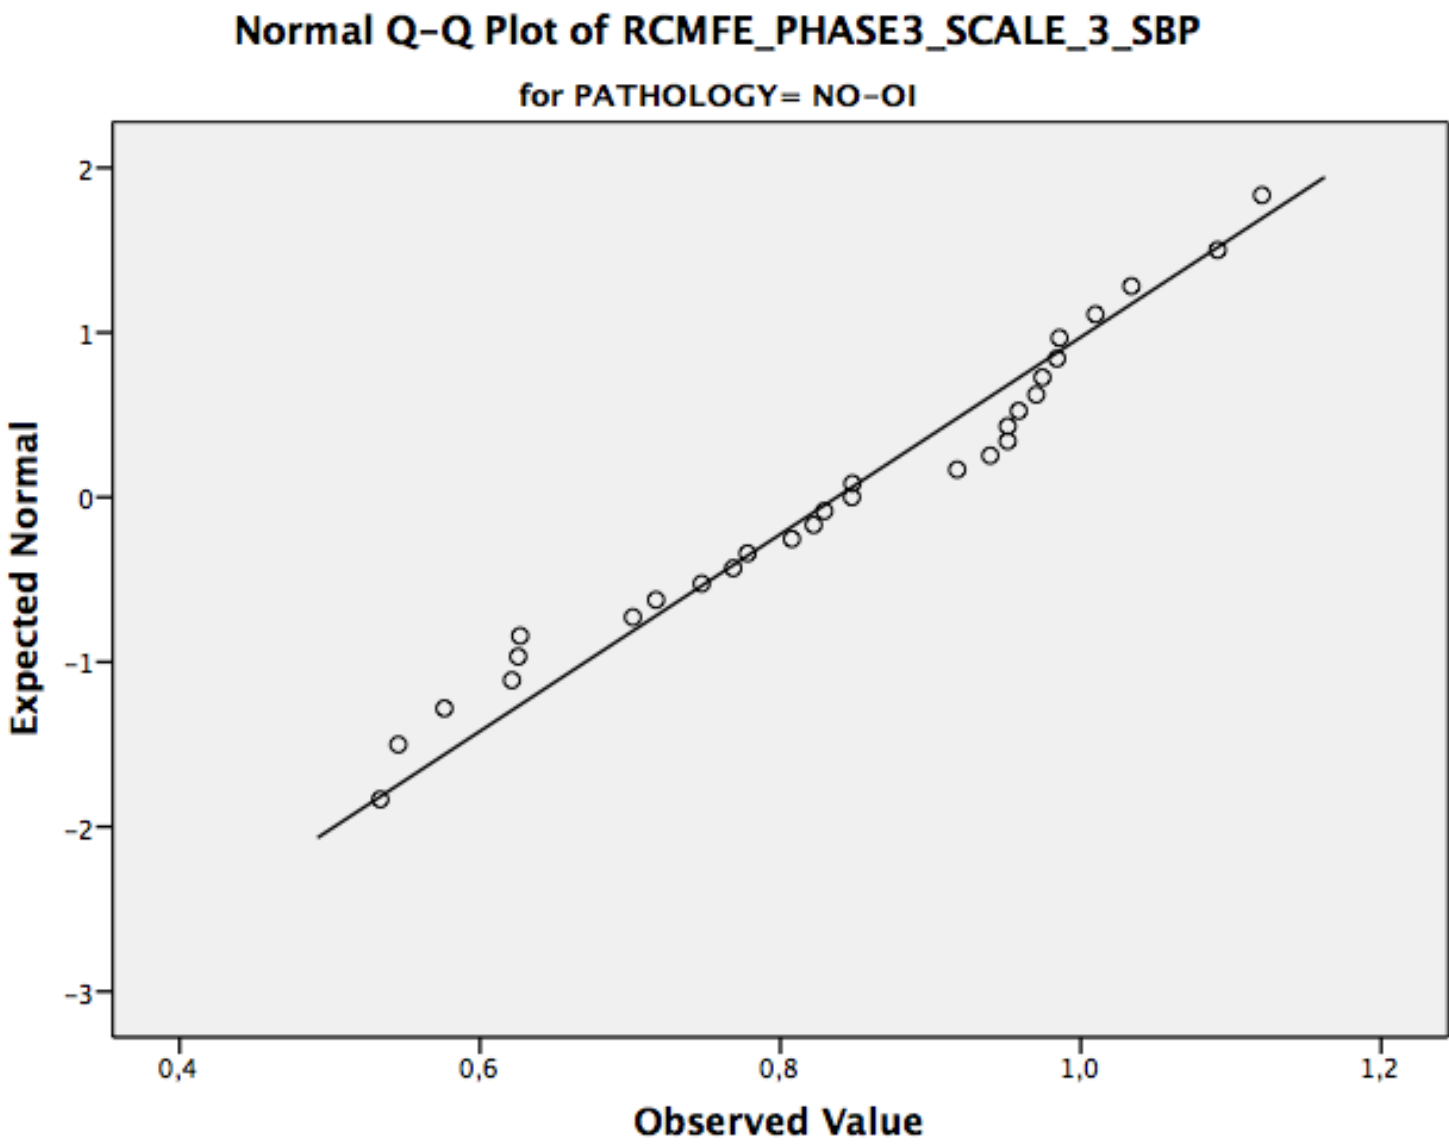

# Normal Q-Q Plot of RCMFE\_PHASE3\_SCALE\_3\_SBP

for PATHOLOGY= OI

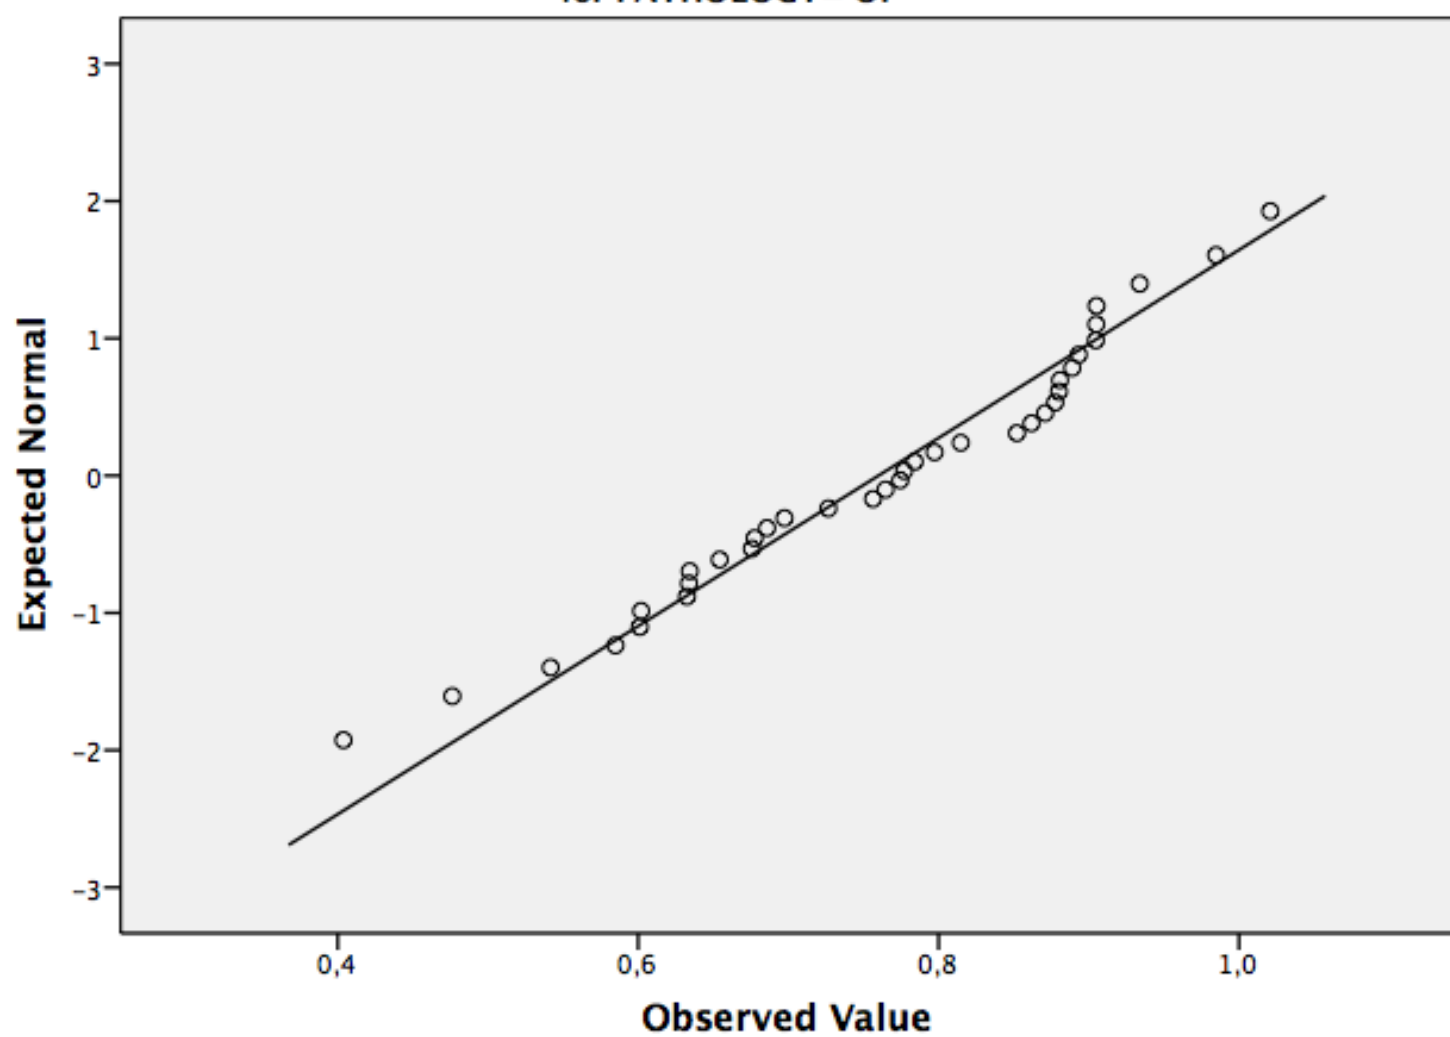

Normal Q-Q Plots

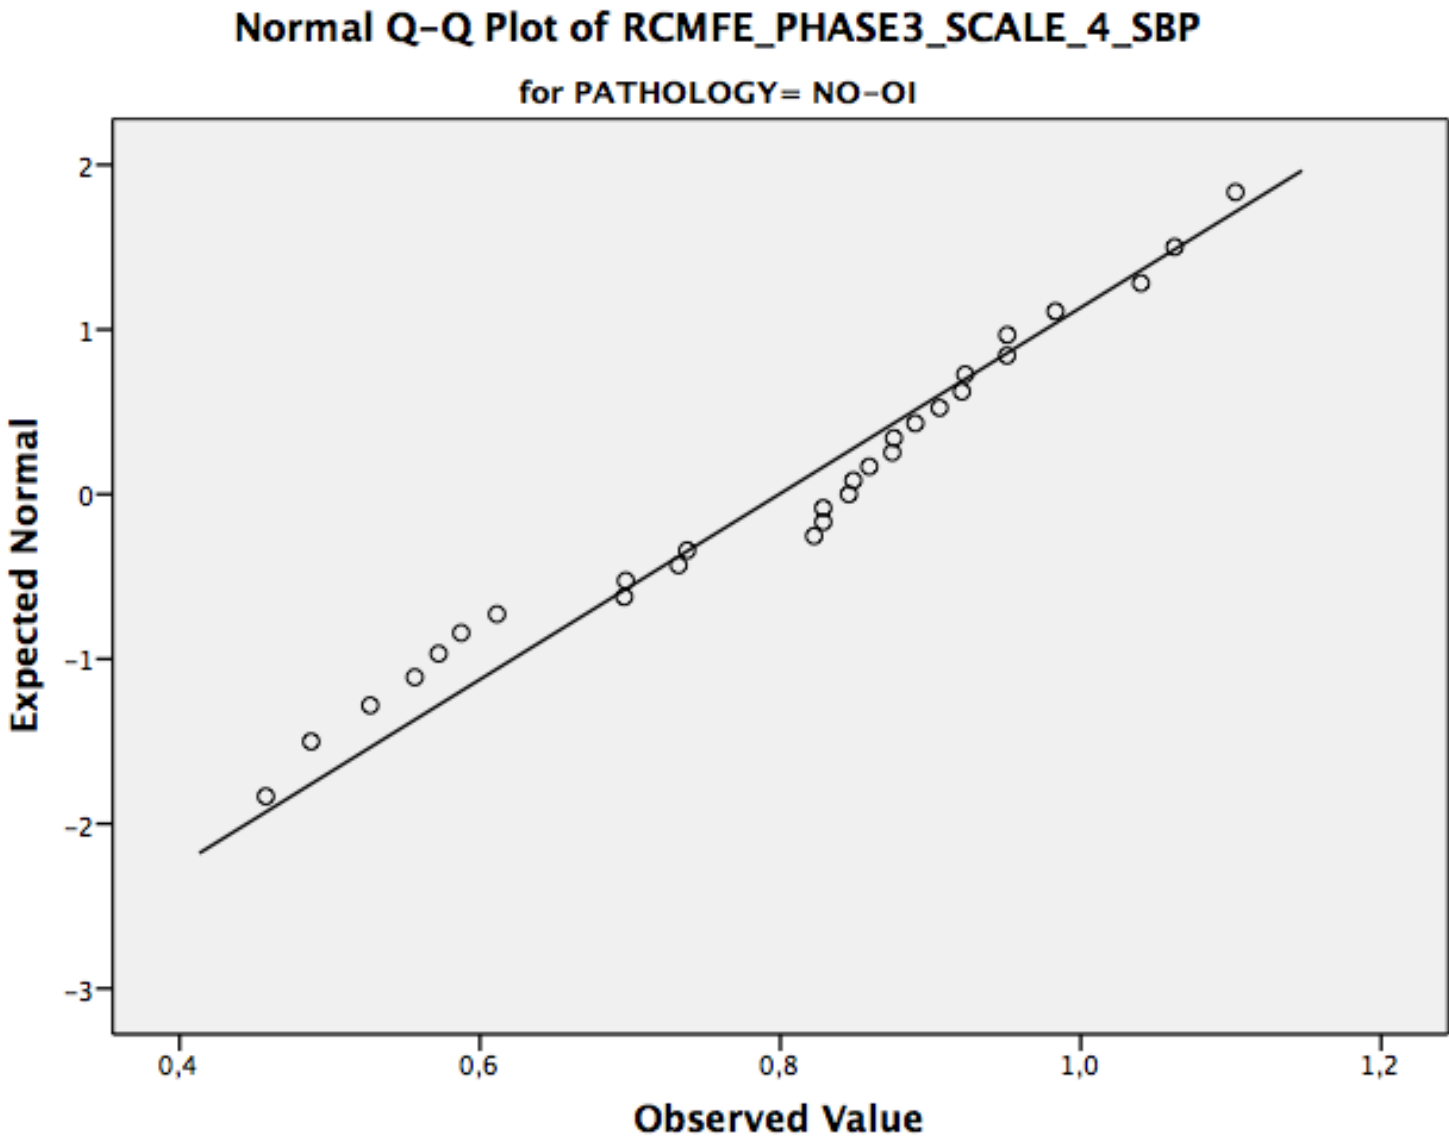

# Normal Q-Q Plot of RCMFE\_PHASE3\_SCALE\_4\_SBP

for PATHOLOGY= OI

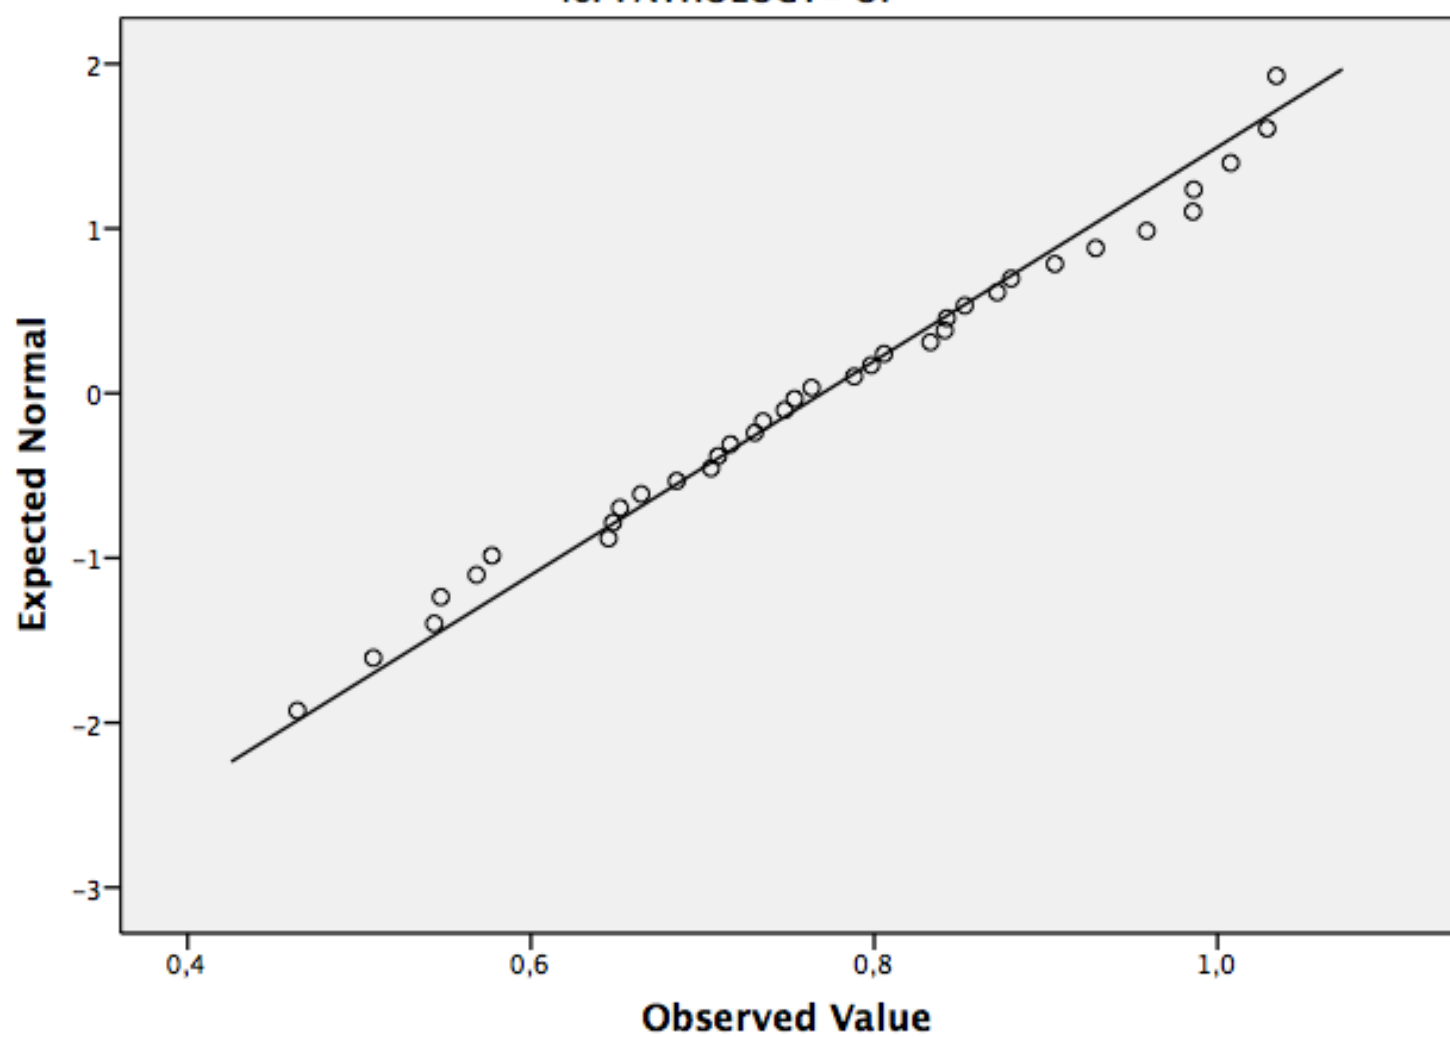



Normal Q-Q Plots

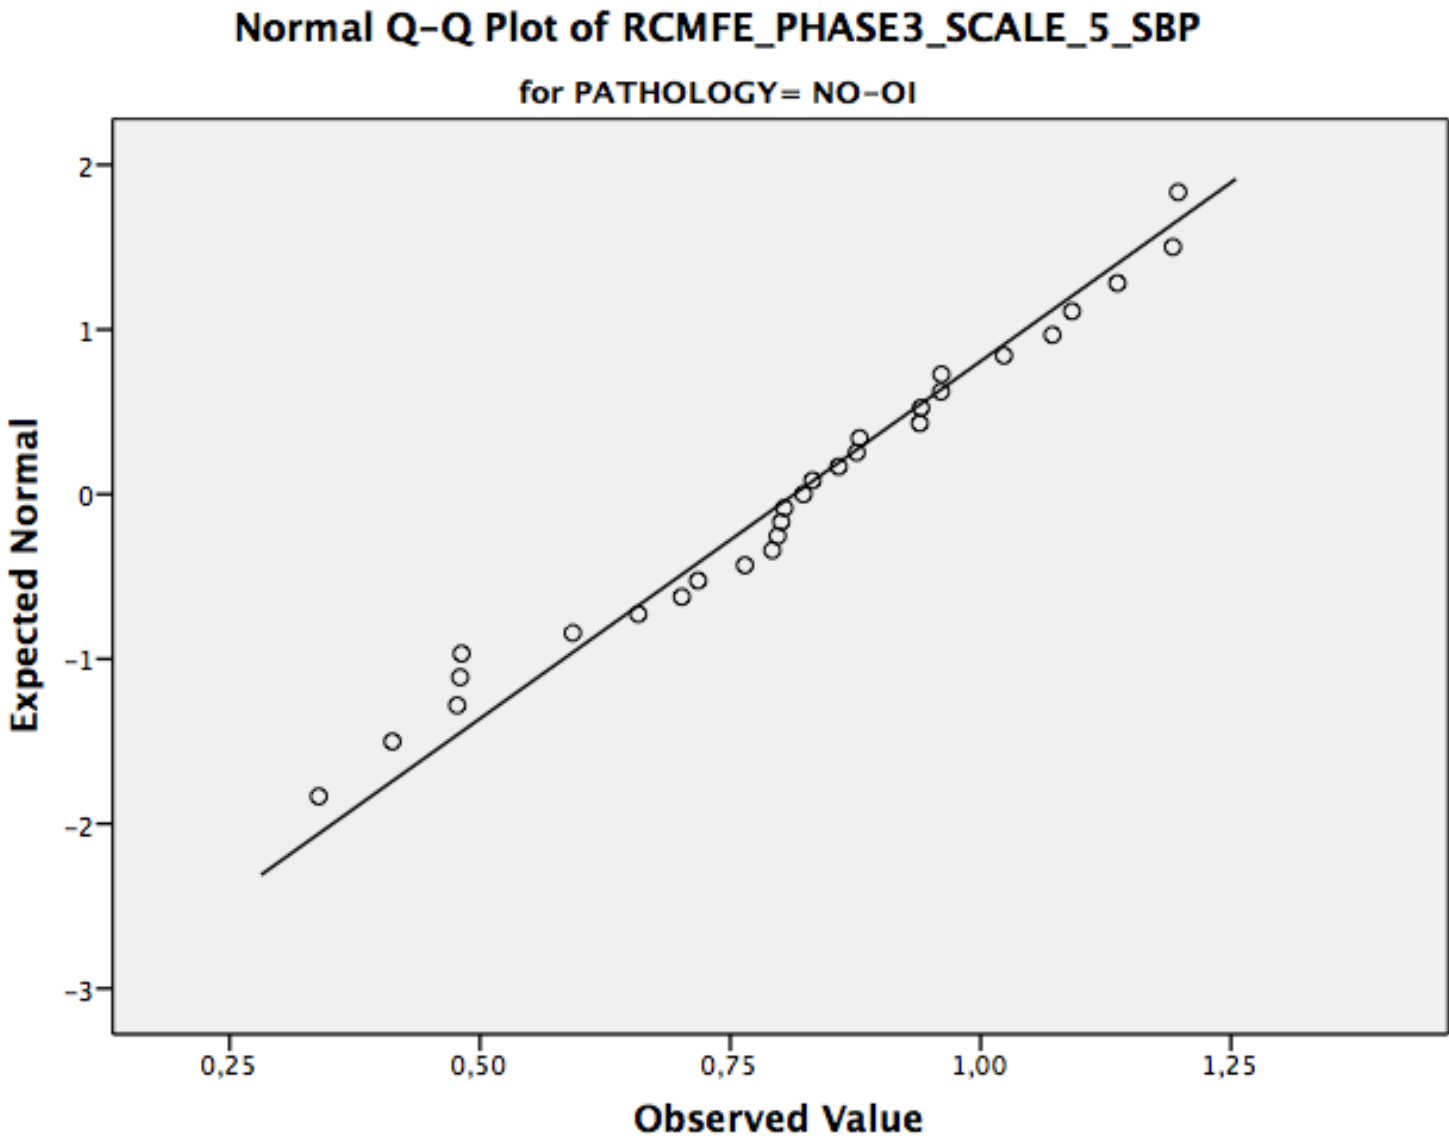

# Normal Q-Q Plot of RCMFE\_PHASE3\_SCALE\_5\_SBP

for PATHOLOGY= OI

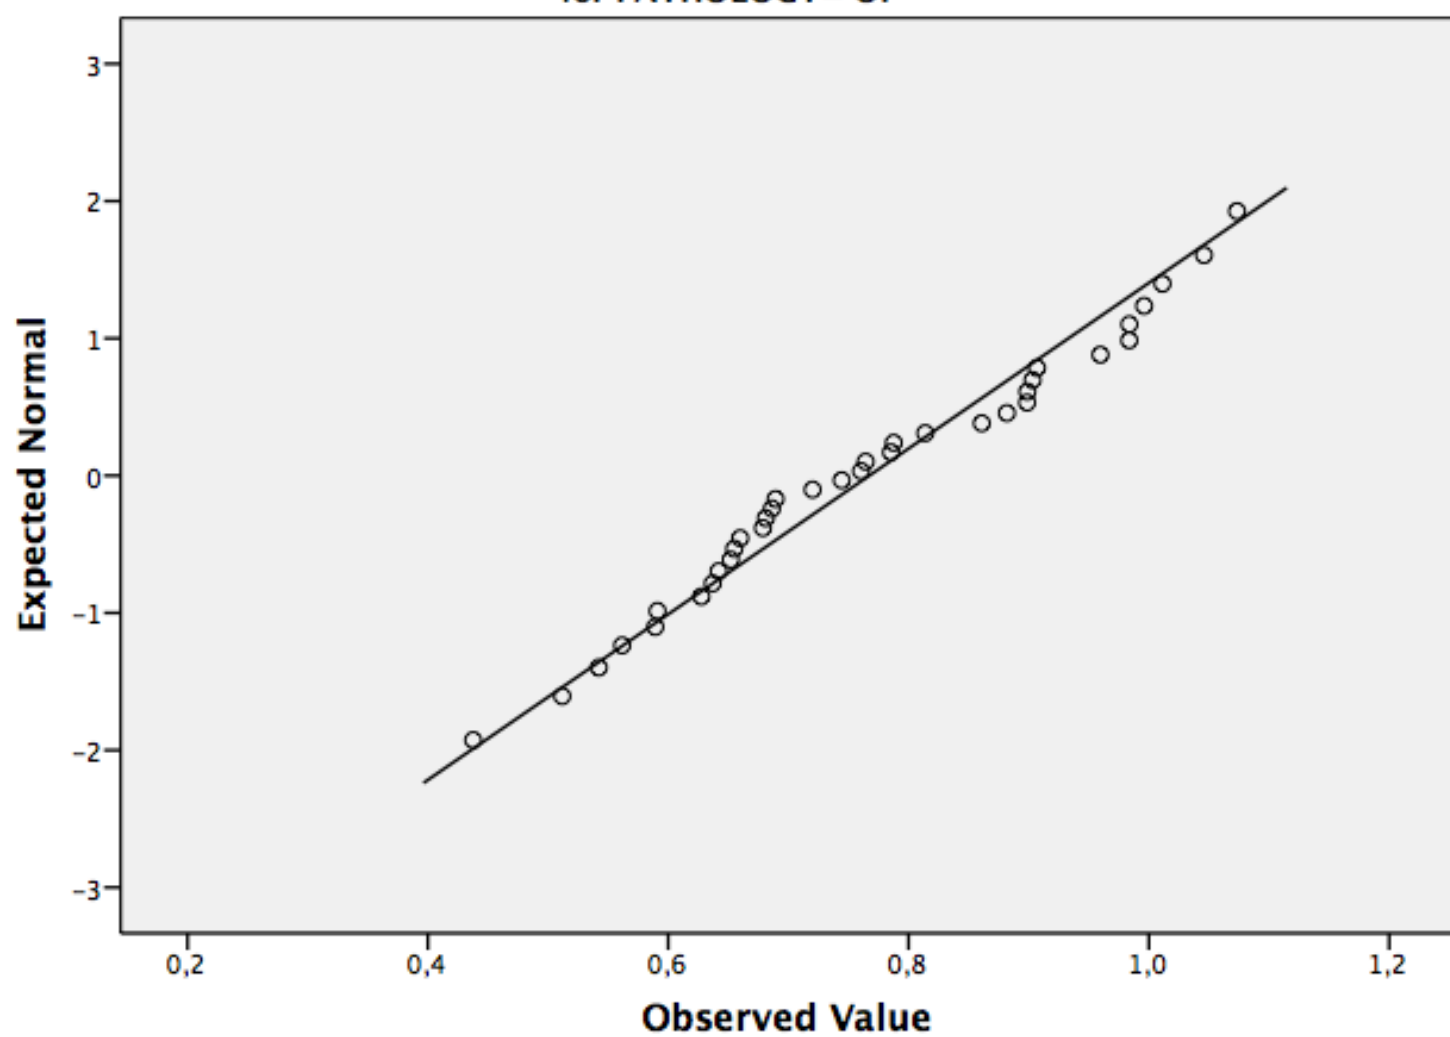

Normal Q-Q Plots

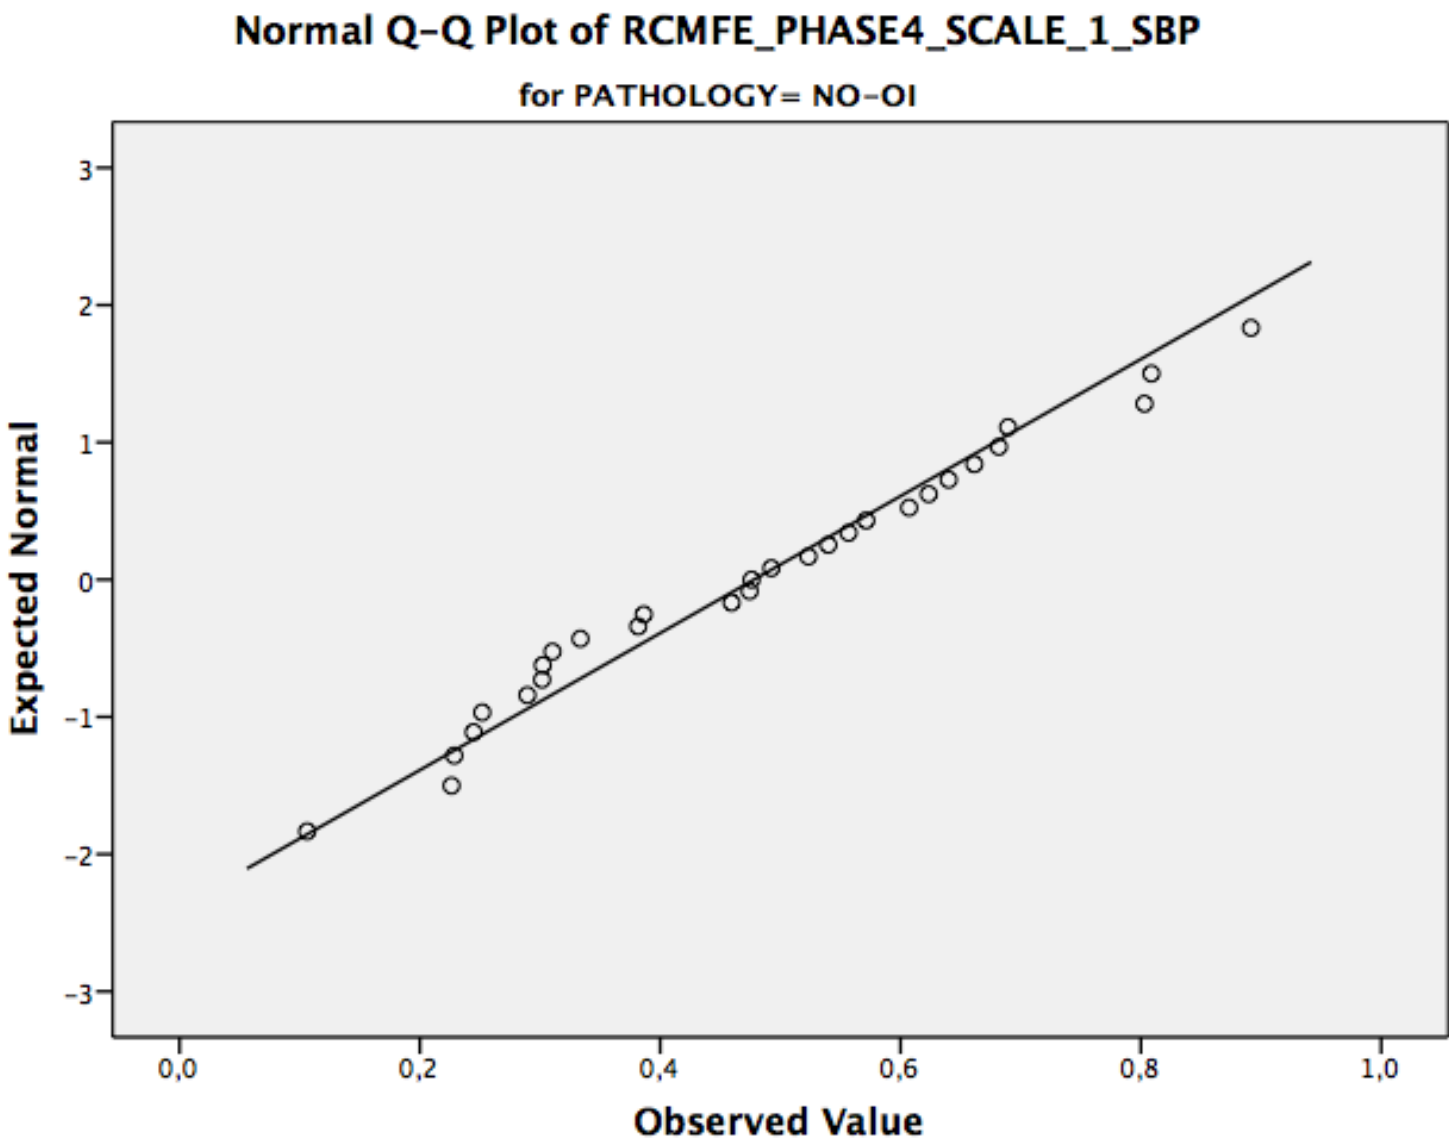

# Normal Q-Q Plot of RCMFE\_PHASE4\_SCALE\_1\_SBP

for PATHOLOGY= OI

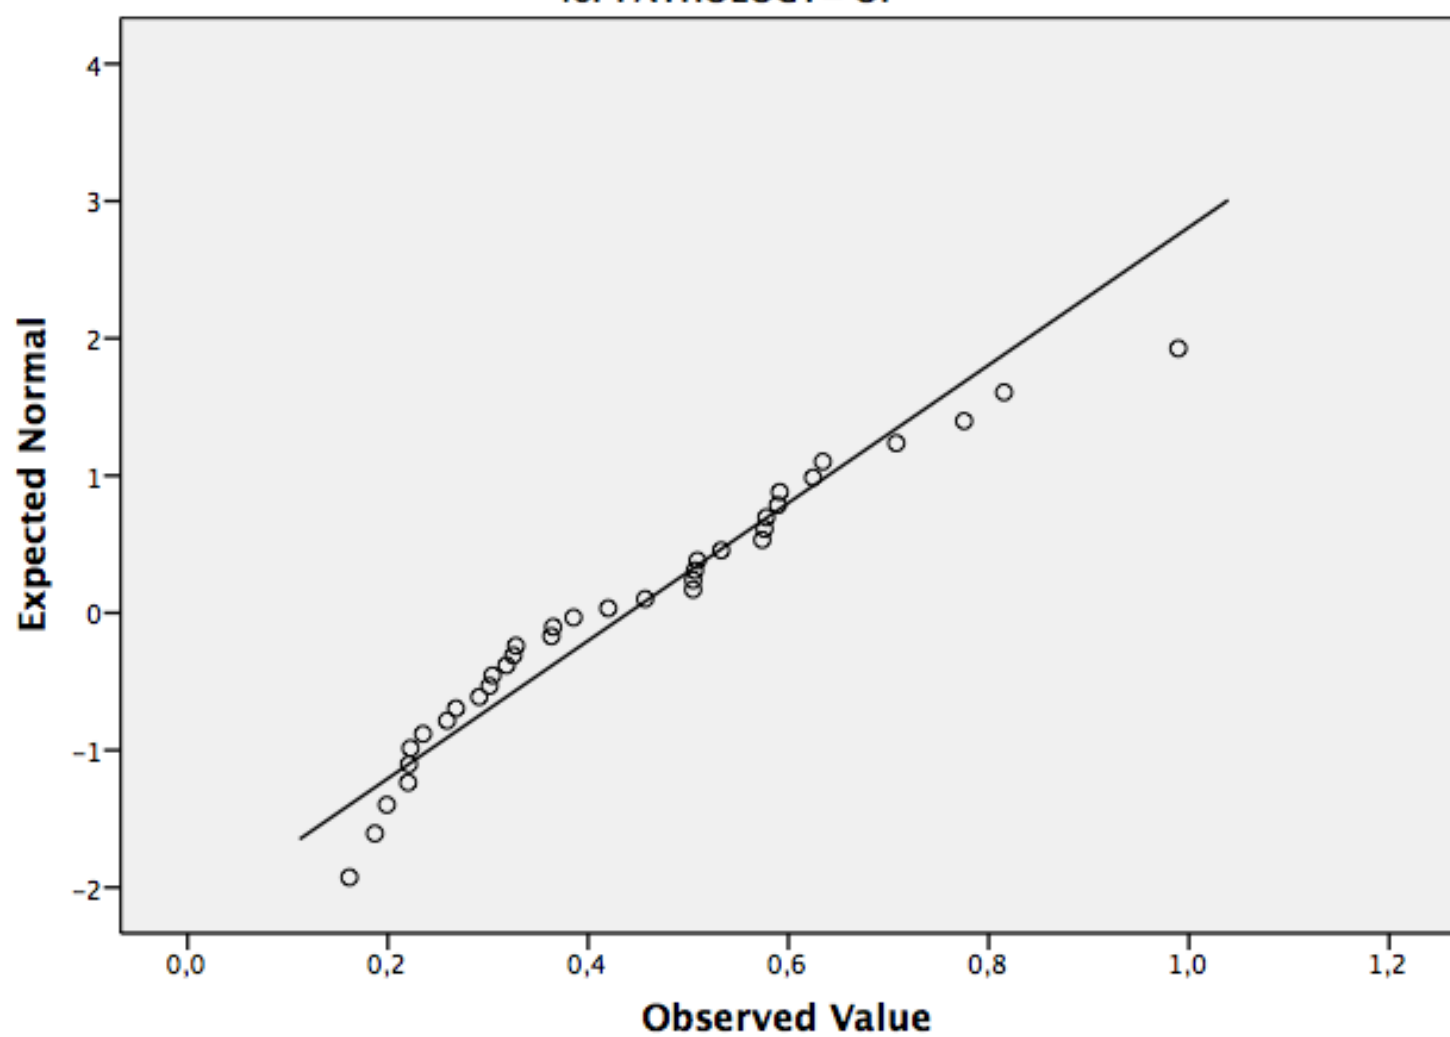

Normal Q-Q Plots

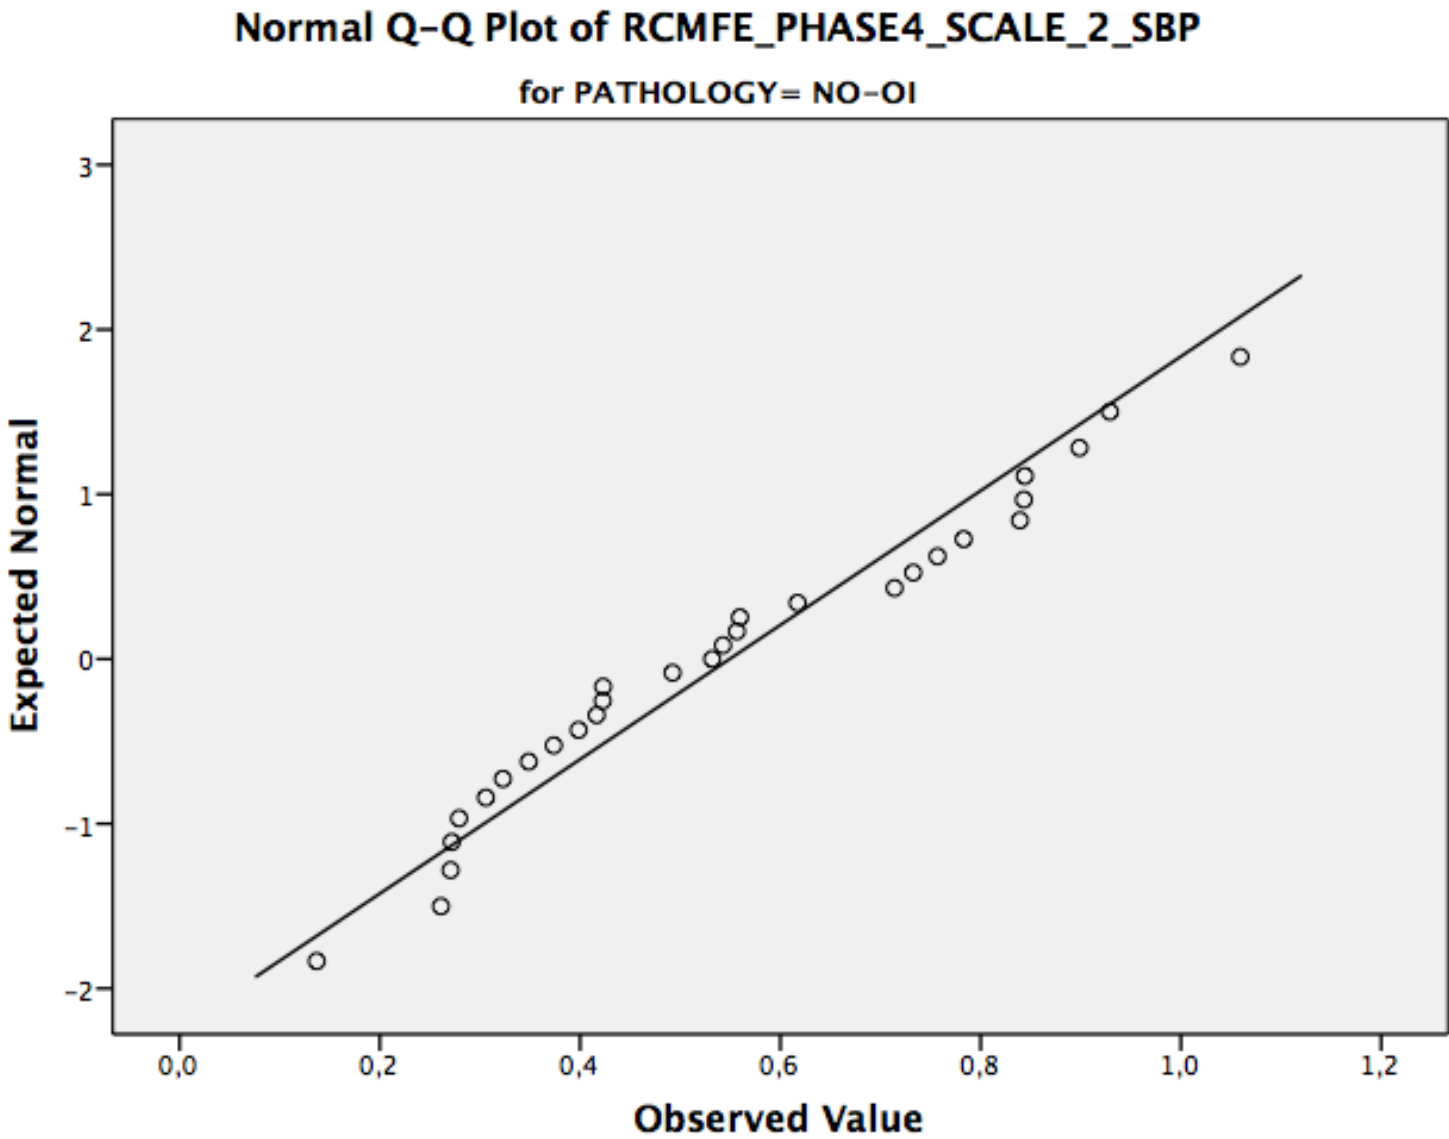

# Normal Q-Q Plot of RCMFE\_PHASE4\_SCALE\_2\_SBP

for PATHOLOGY= OI

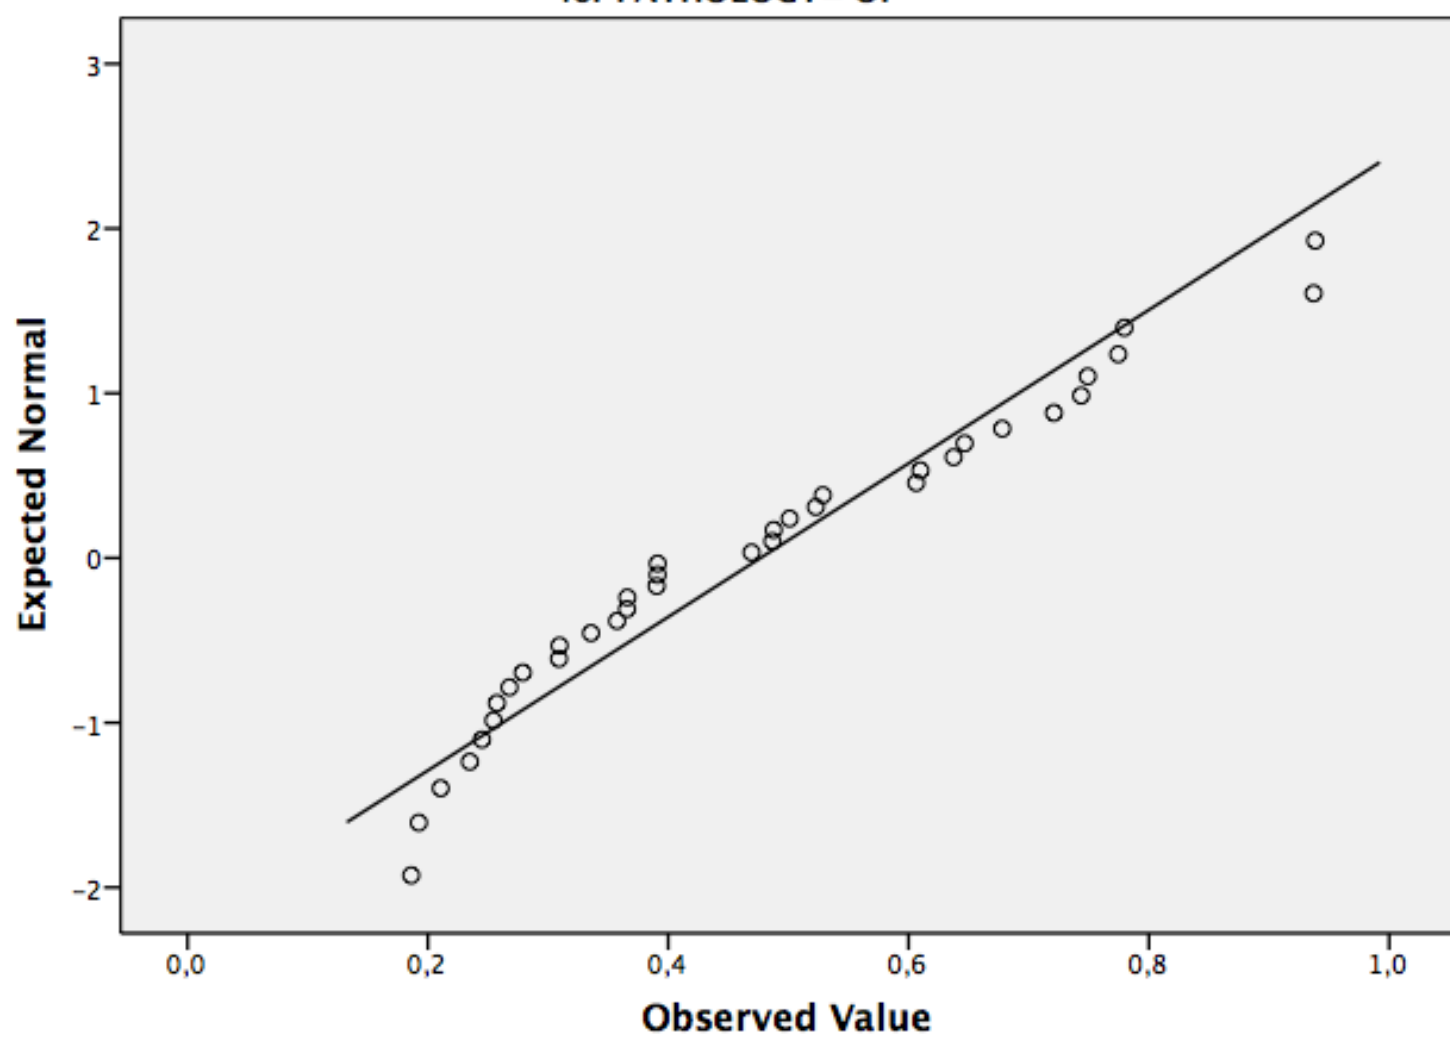

Normal Q-Q Plots

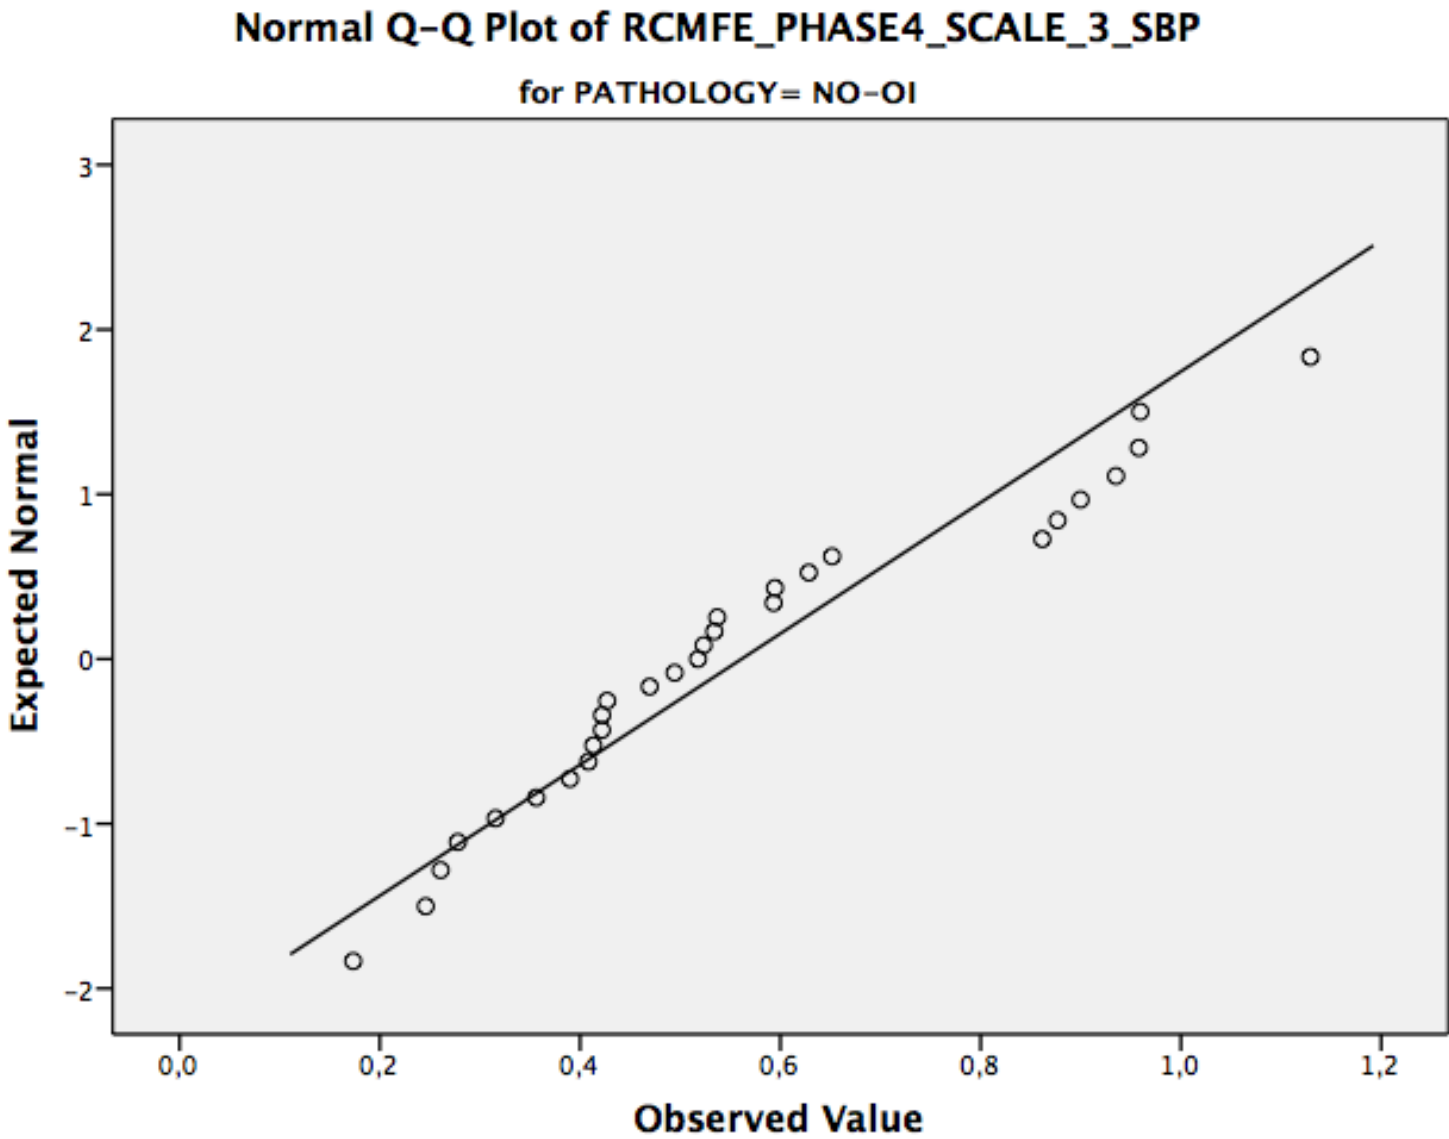

# Normal Q-Q Plot of RCMFE\_PHASE4\_SCALE\_3\_SBP

for PATHOLOGY= OI

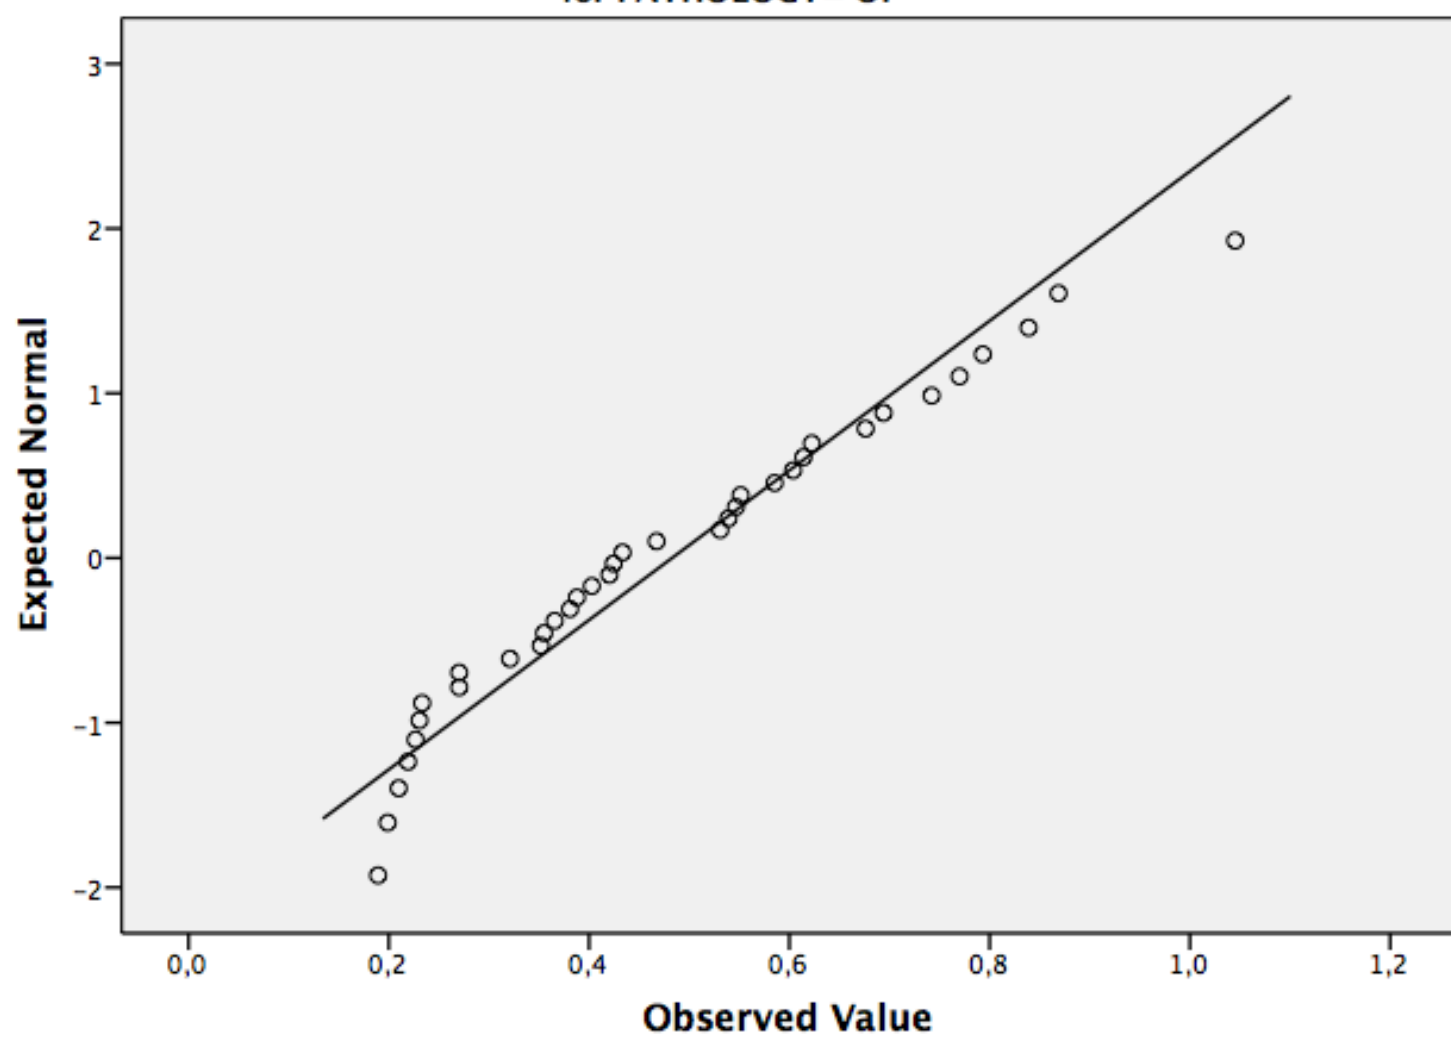



Normal Q-Q Plots

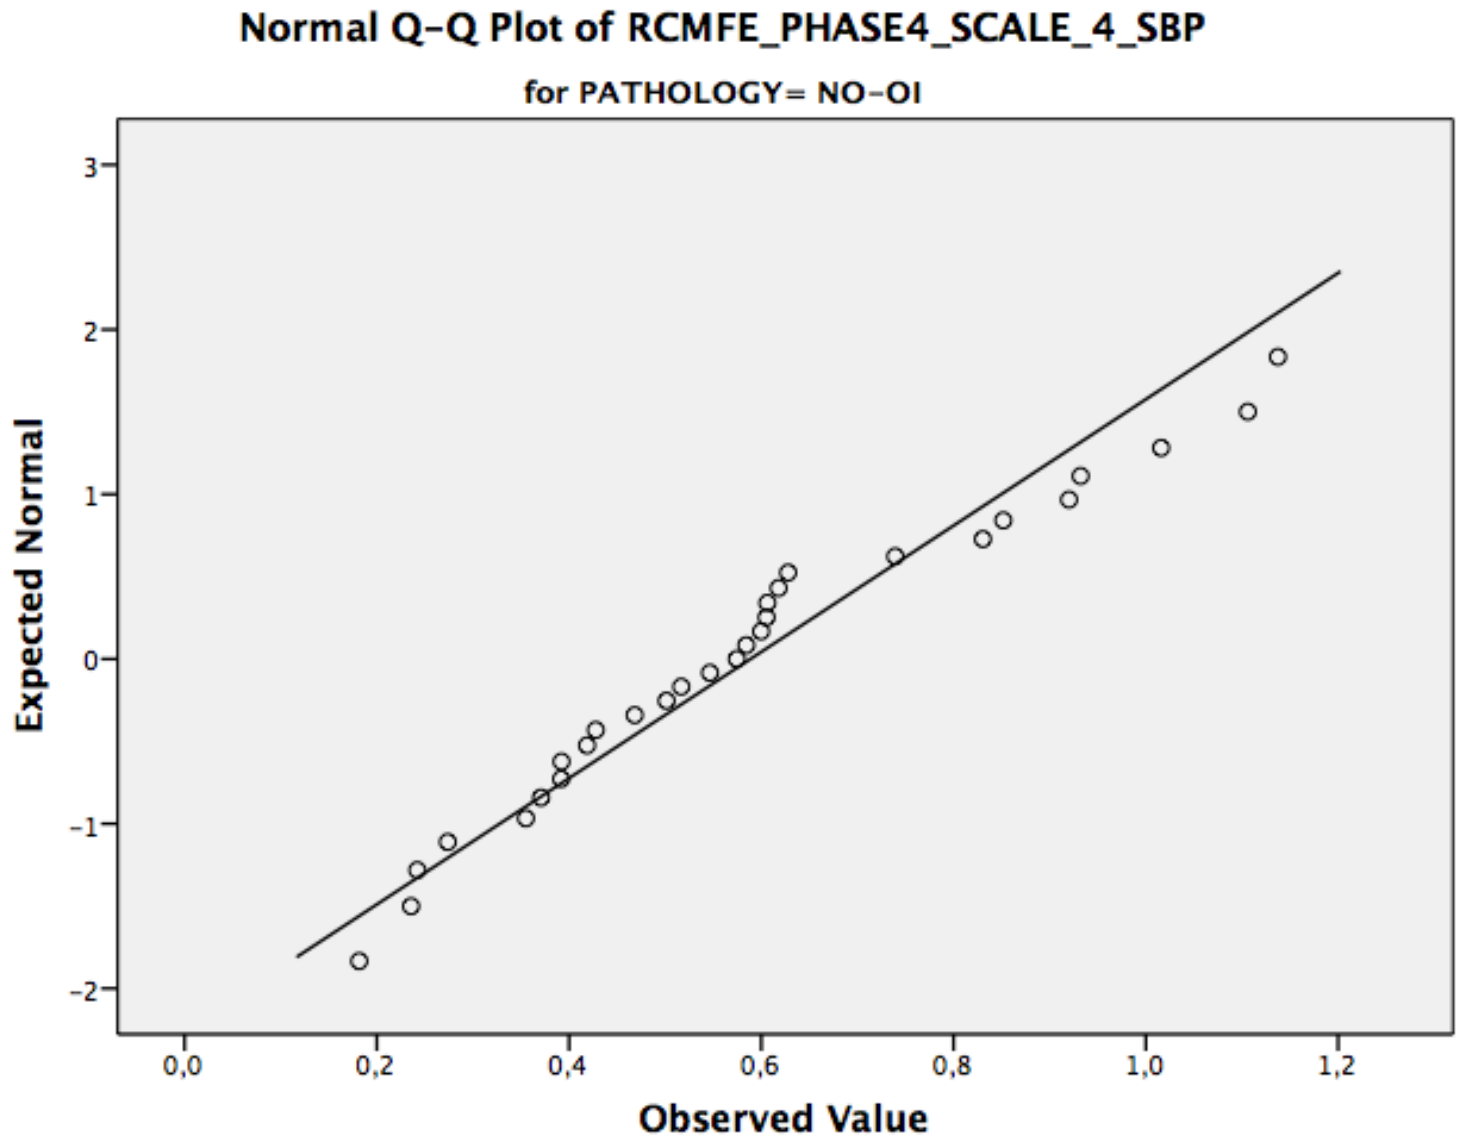

# Normal Q-Q Plot of RCMFE\_PHASE4\_SCALE\_4\_SBP

for PATHOLOGY= OI

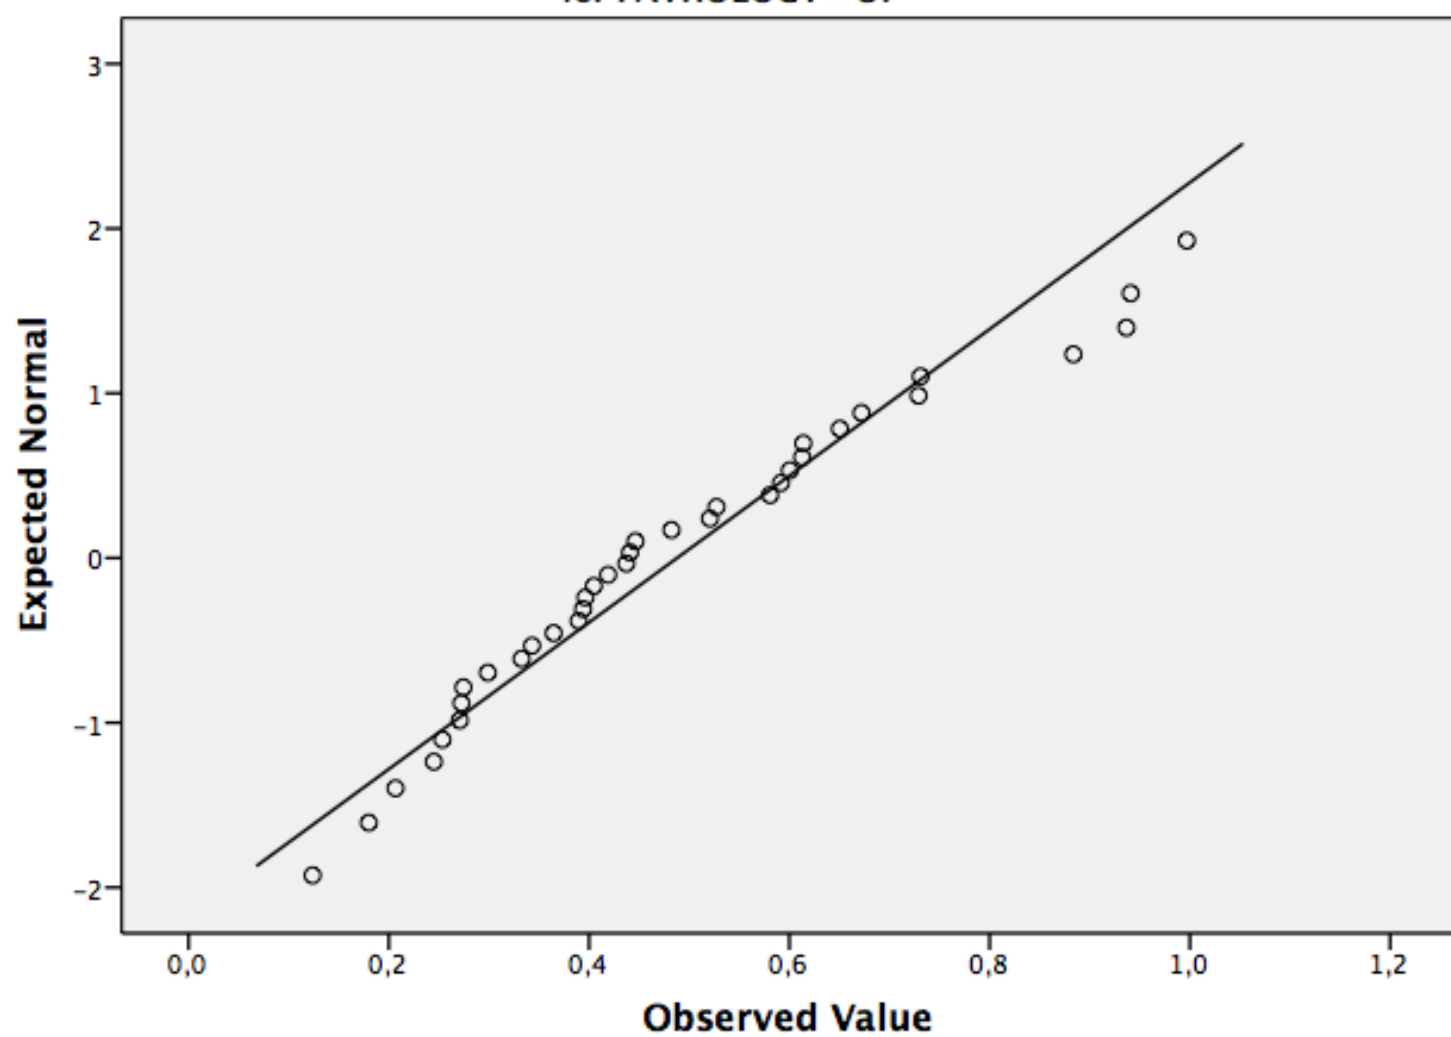

Normal Q-Q Plots

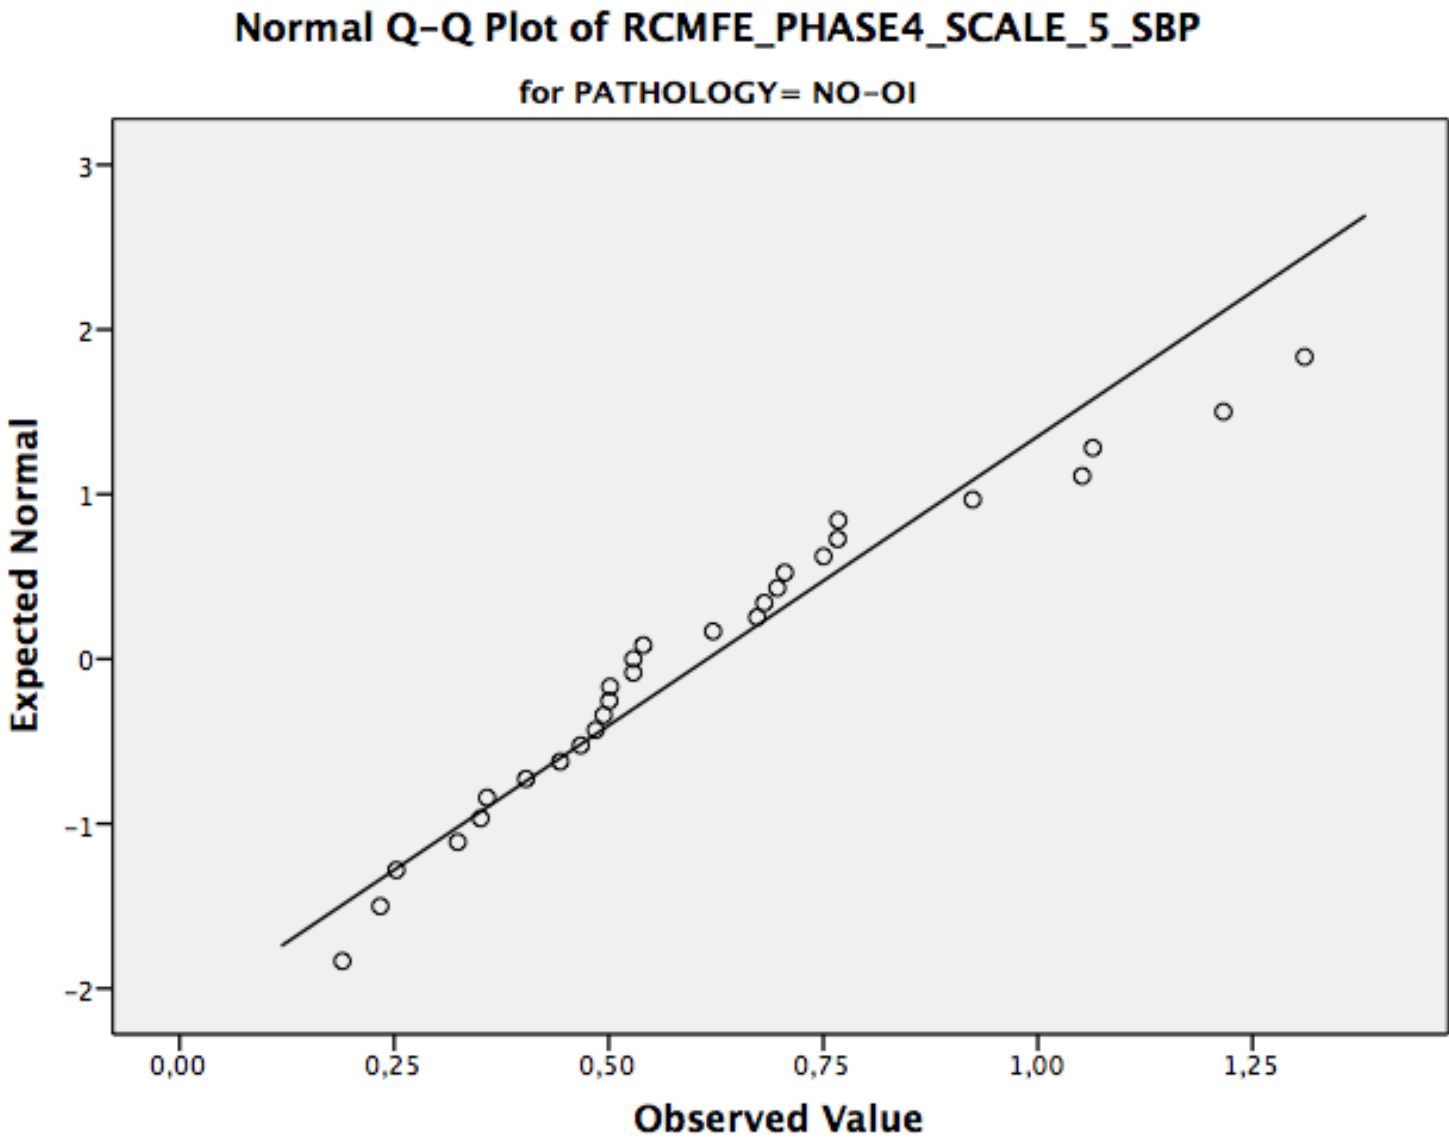

# Normal Q-Q Plot of RCMFE\_PHASE4\_SCALE\_5\_SBP

for PATHOLOGY= OI

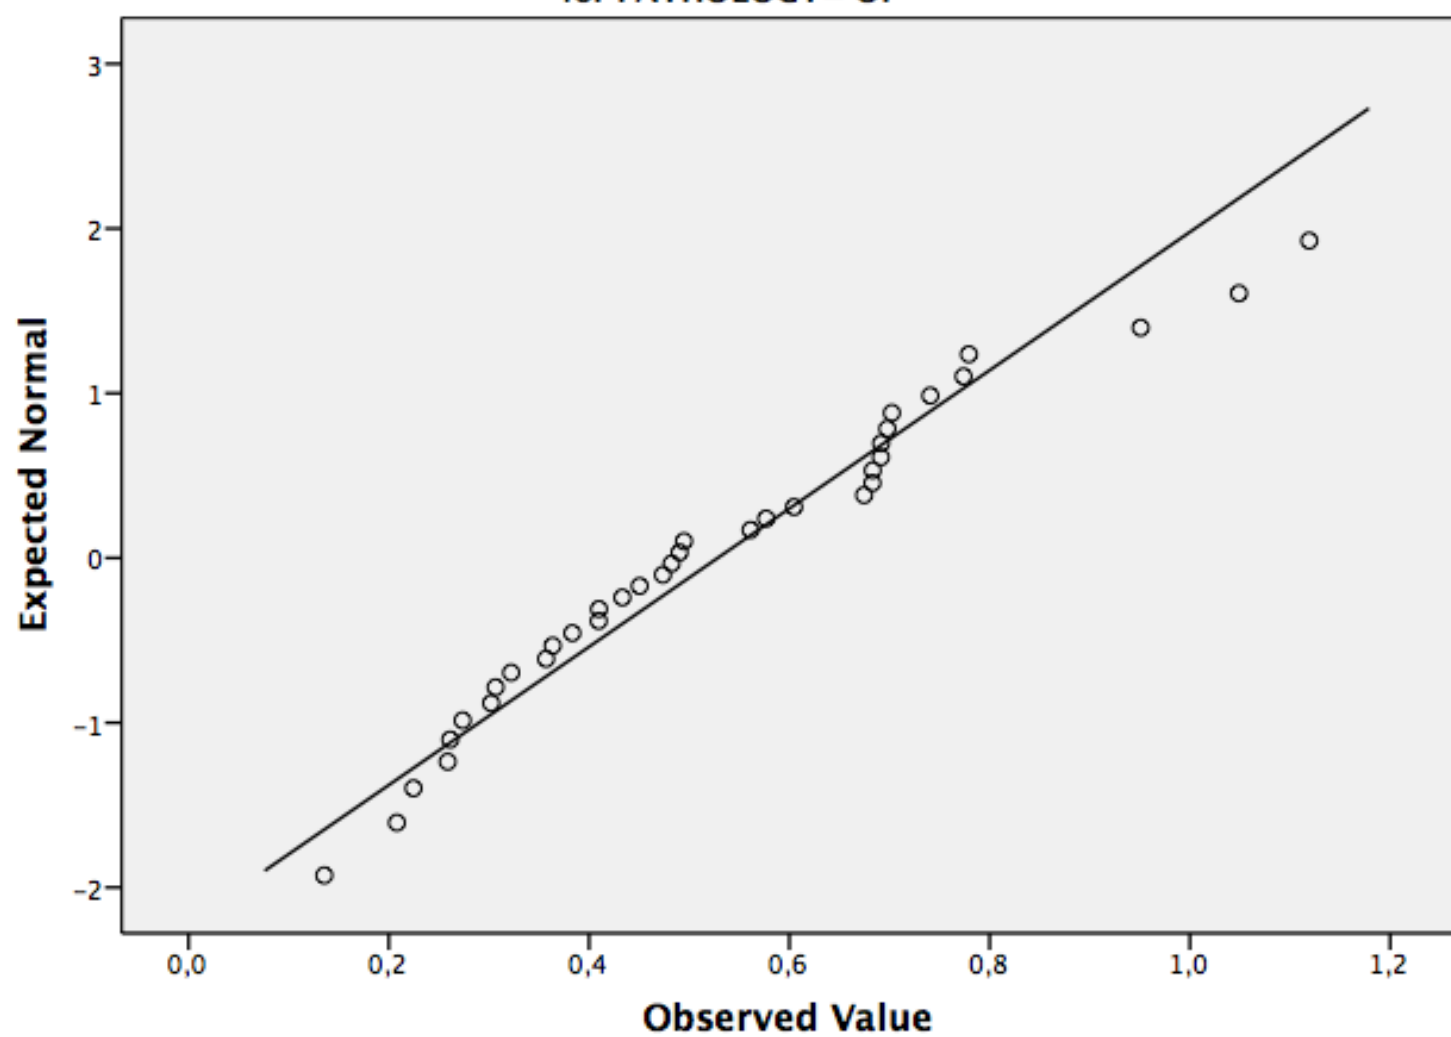

Normal Q-Q Plots

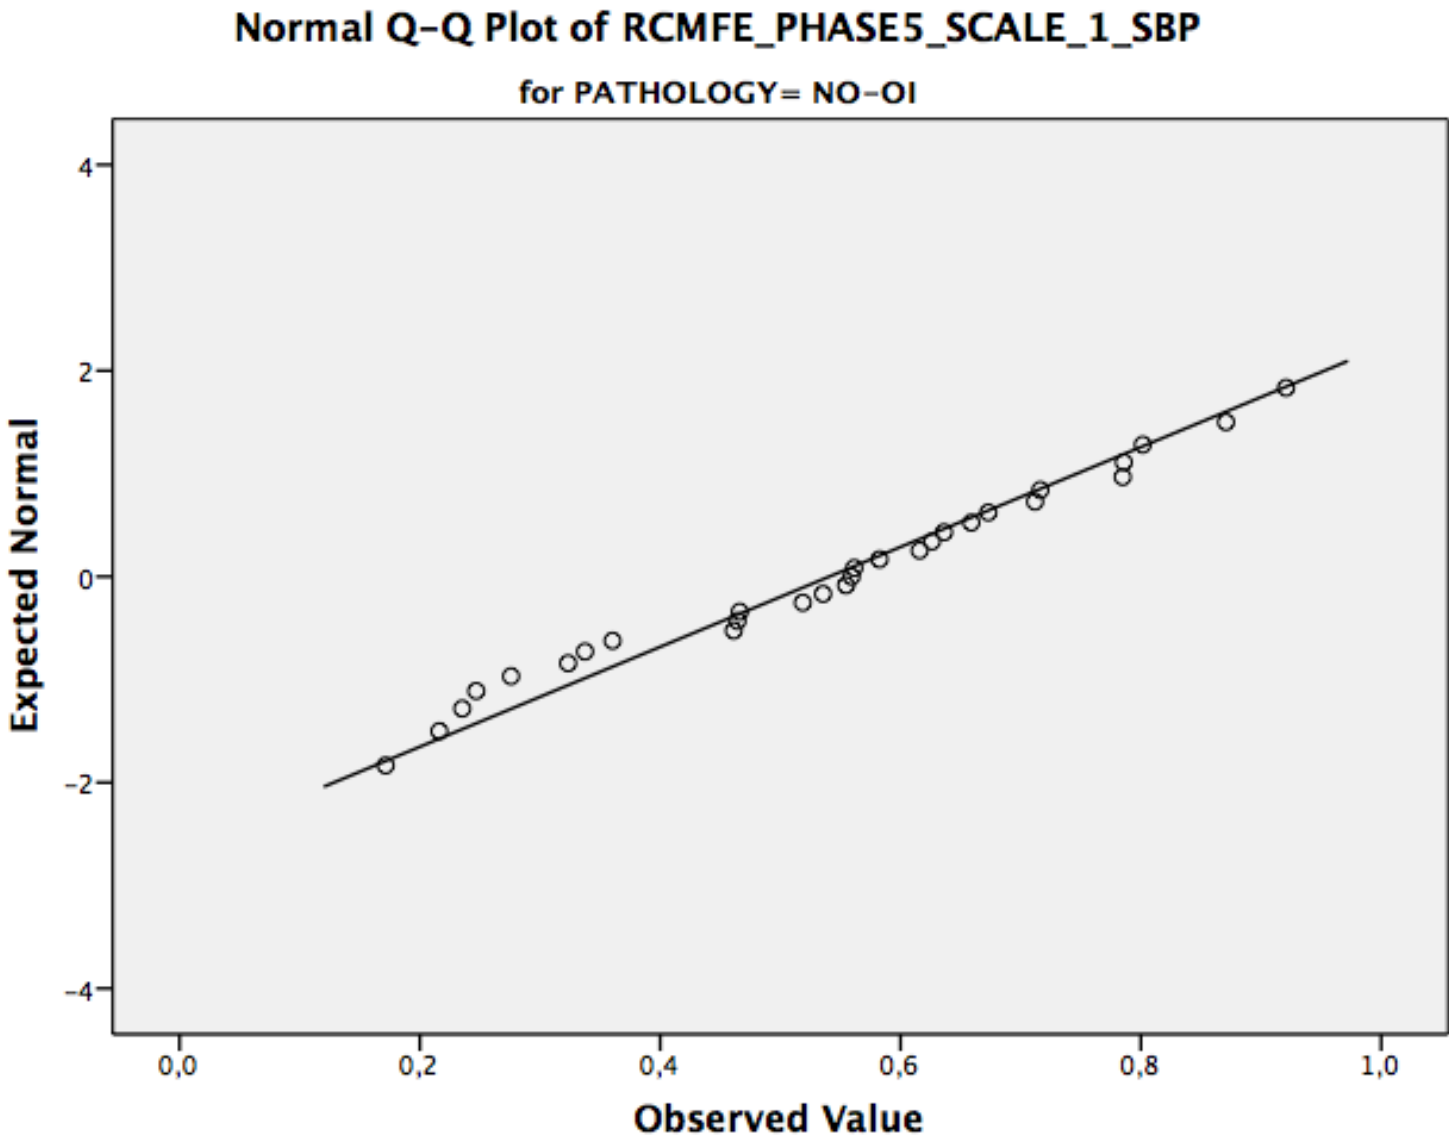

# Normal Q-Q Plot of RCMFE\_PHASE5\_SCALE\_1\_SBP

for PATHOLOGY= OI

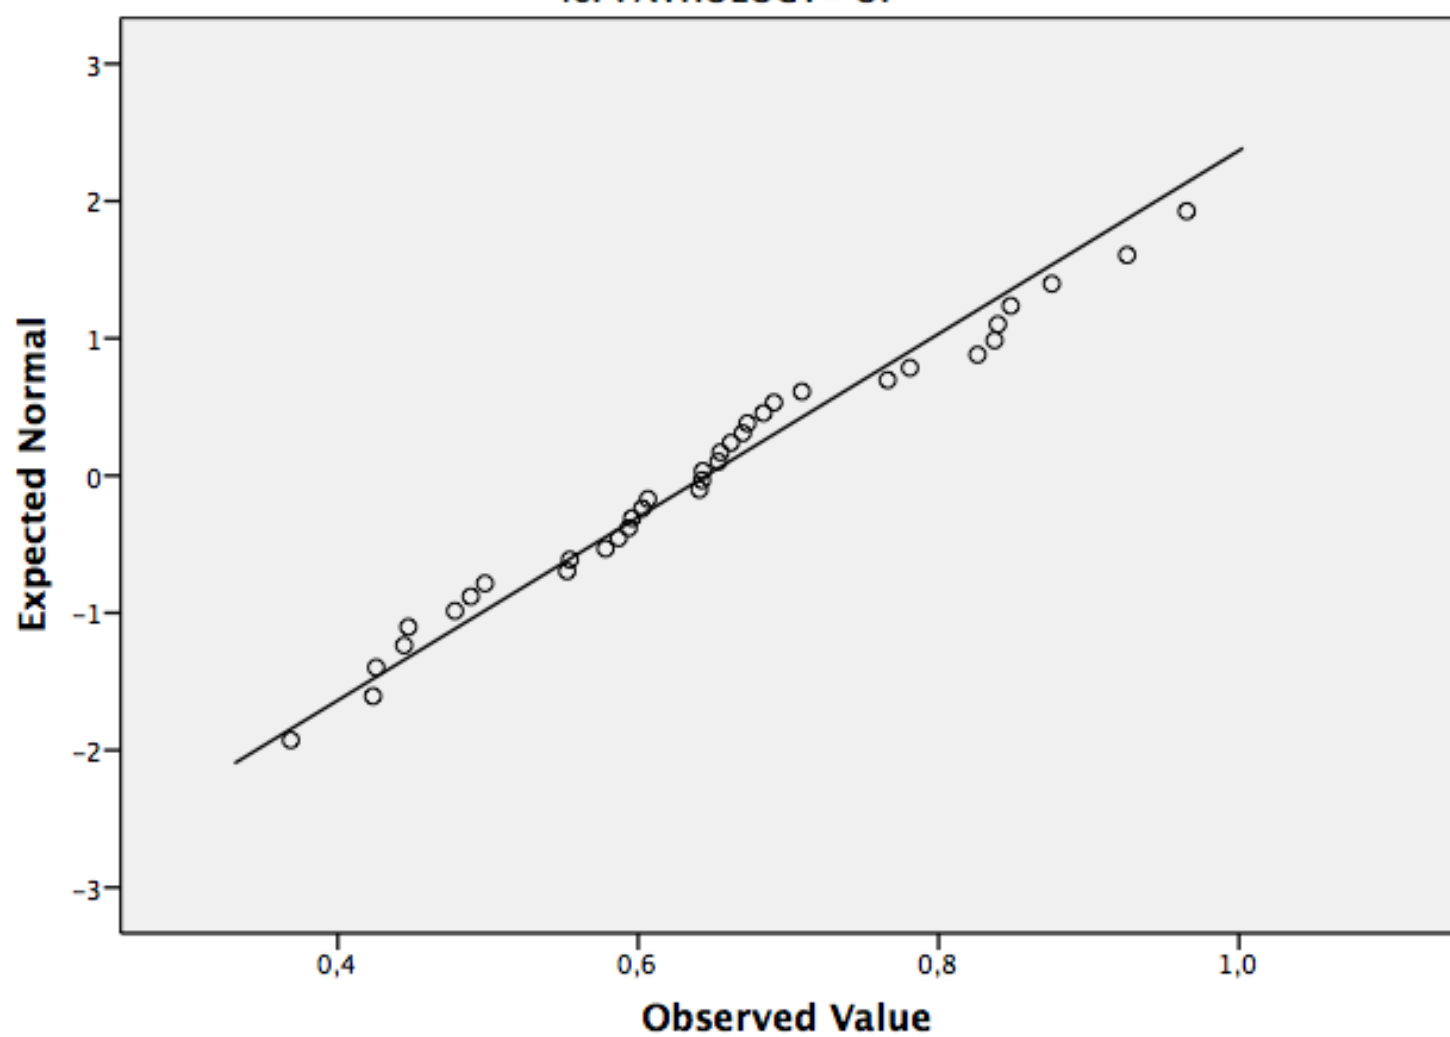

Normal Q-Q Plots

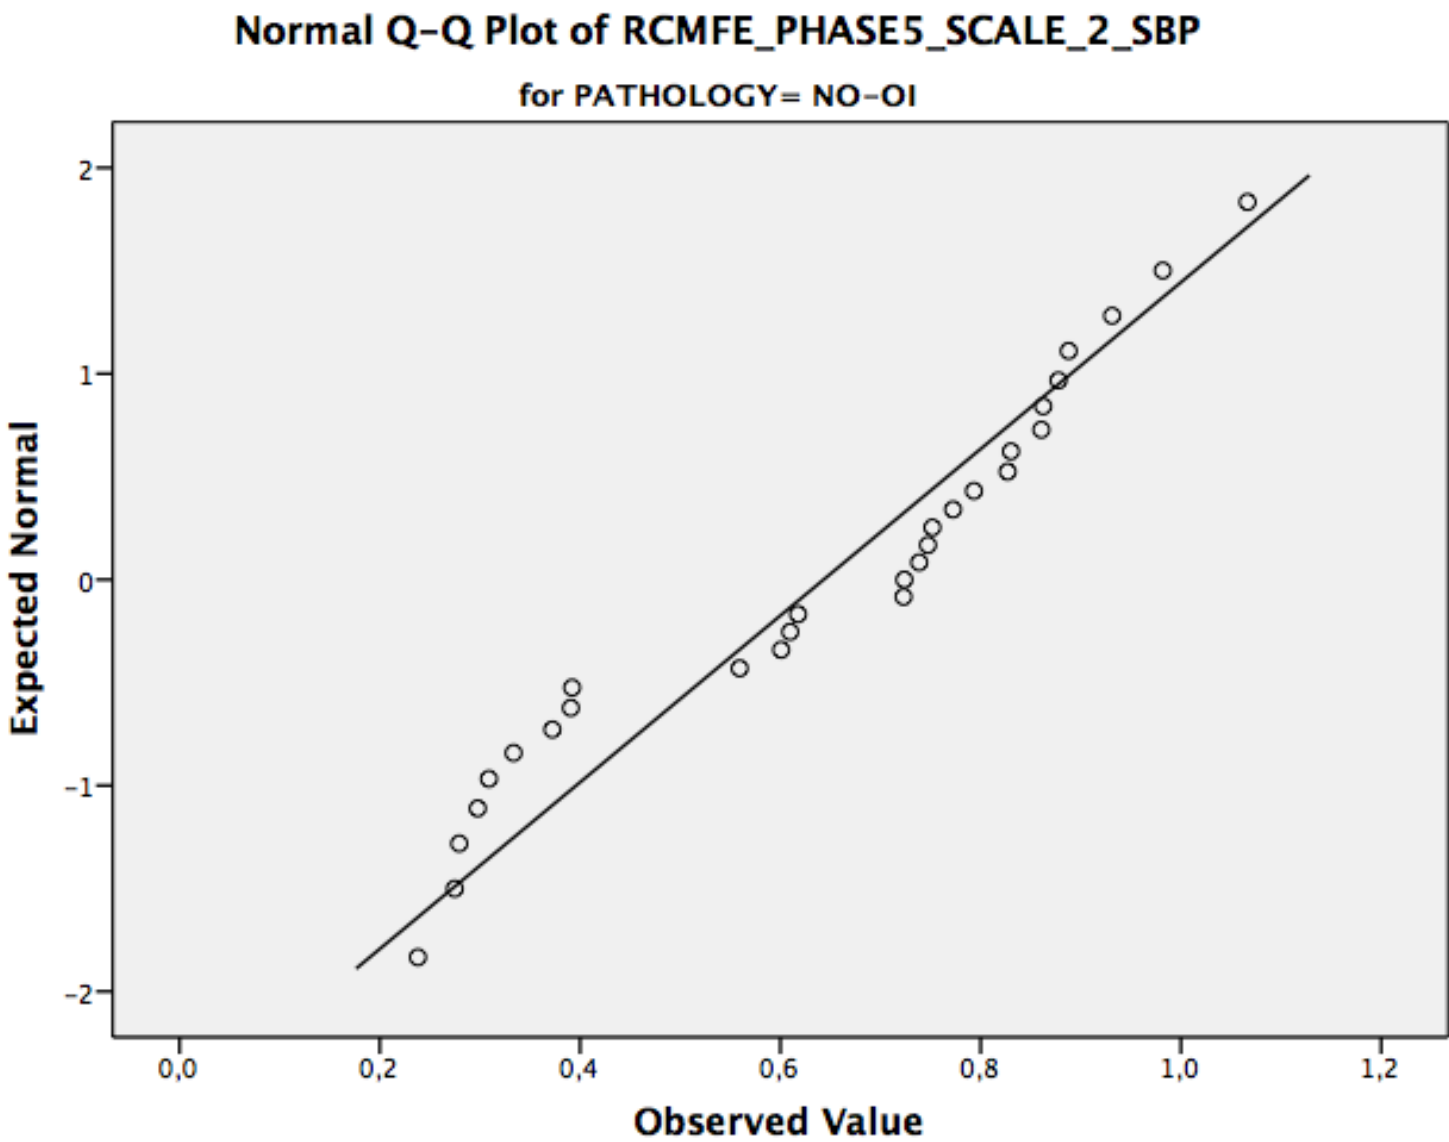

# Normal Q-Q Plot of RCMFE\_PHASE5\_SCALE\_2\_SBP

for PATHOLOGY= OI

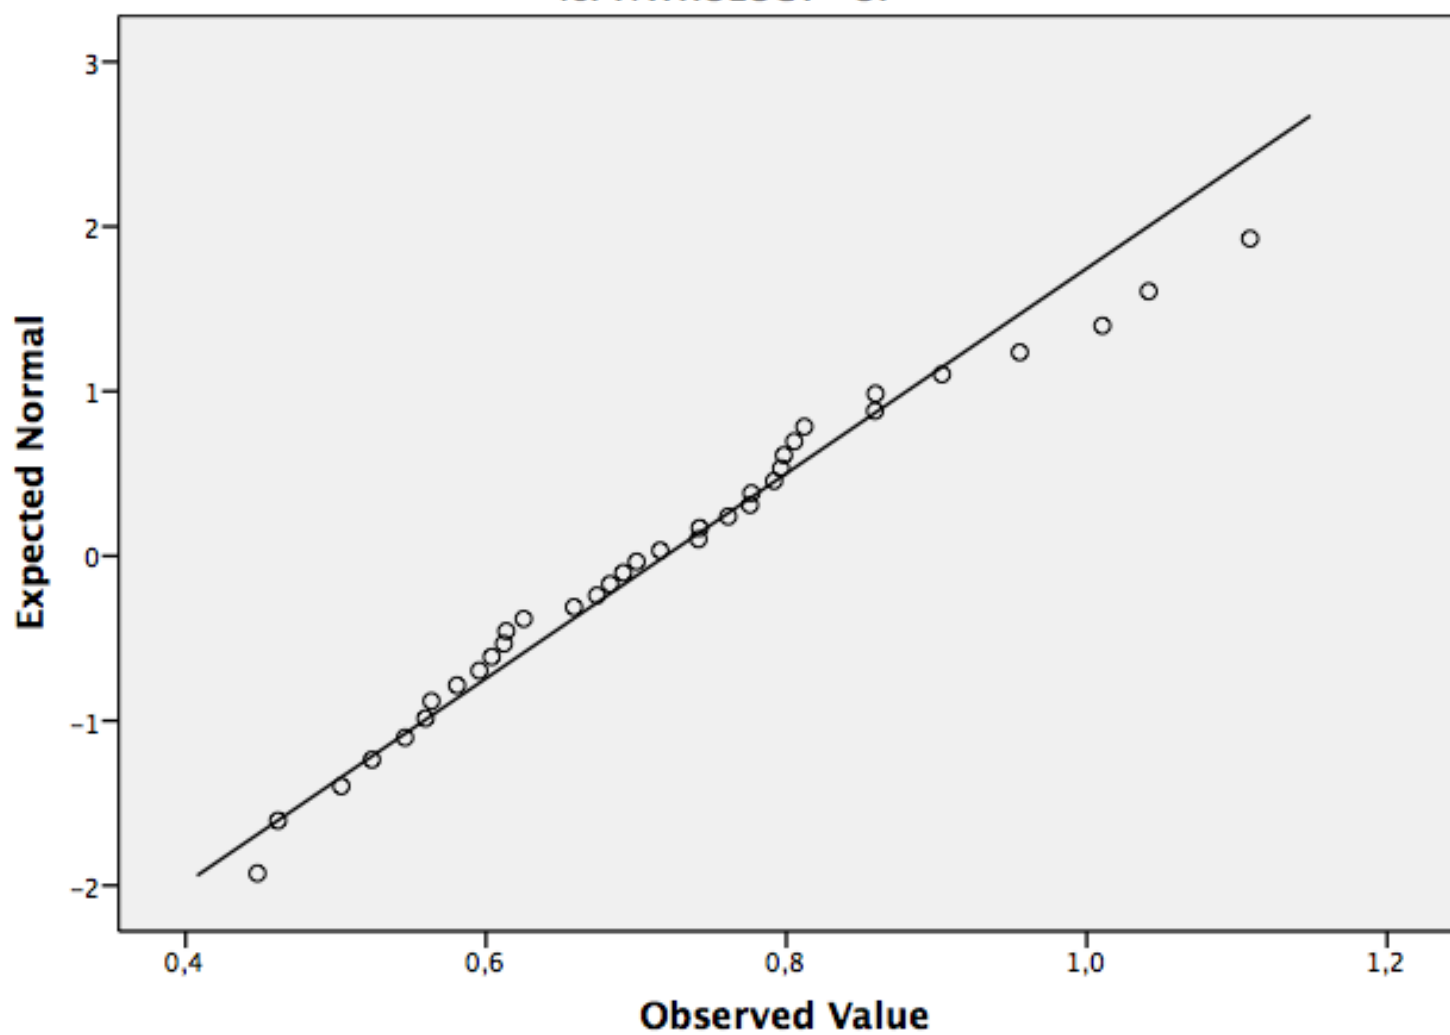



Normal Q-Q Plots

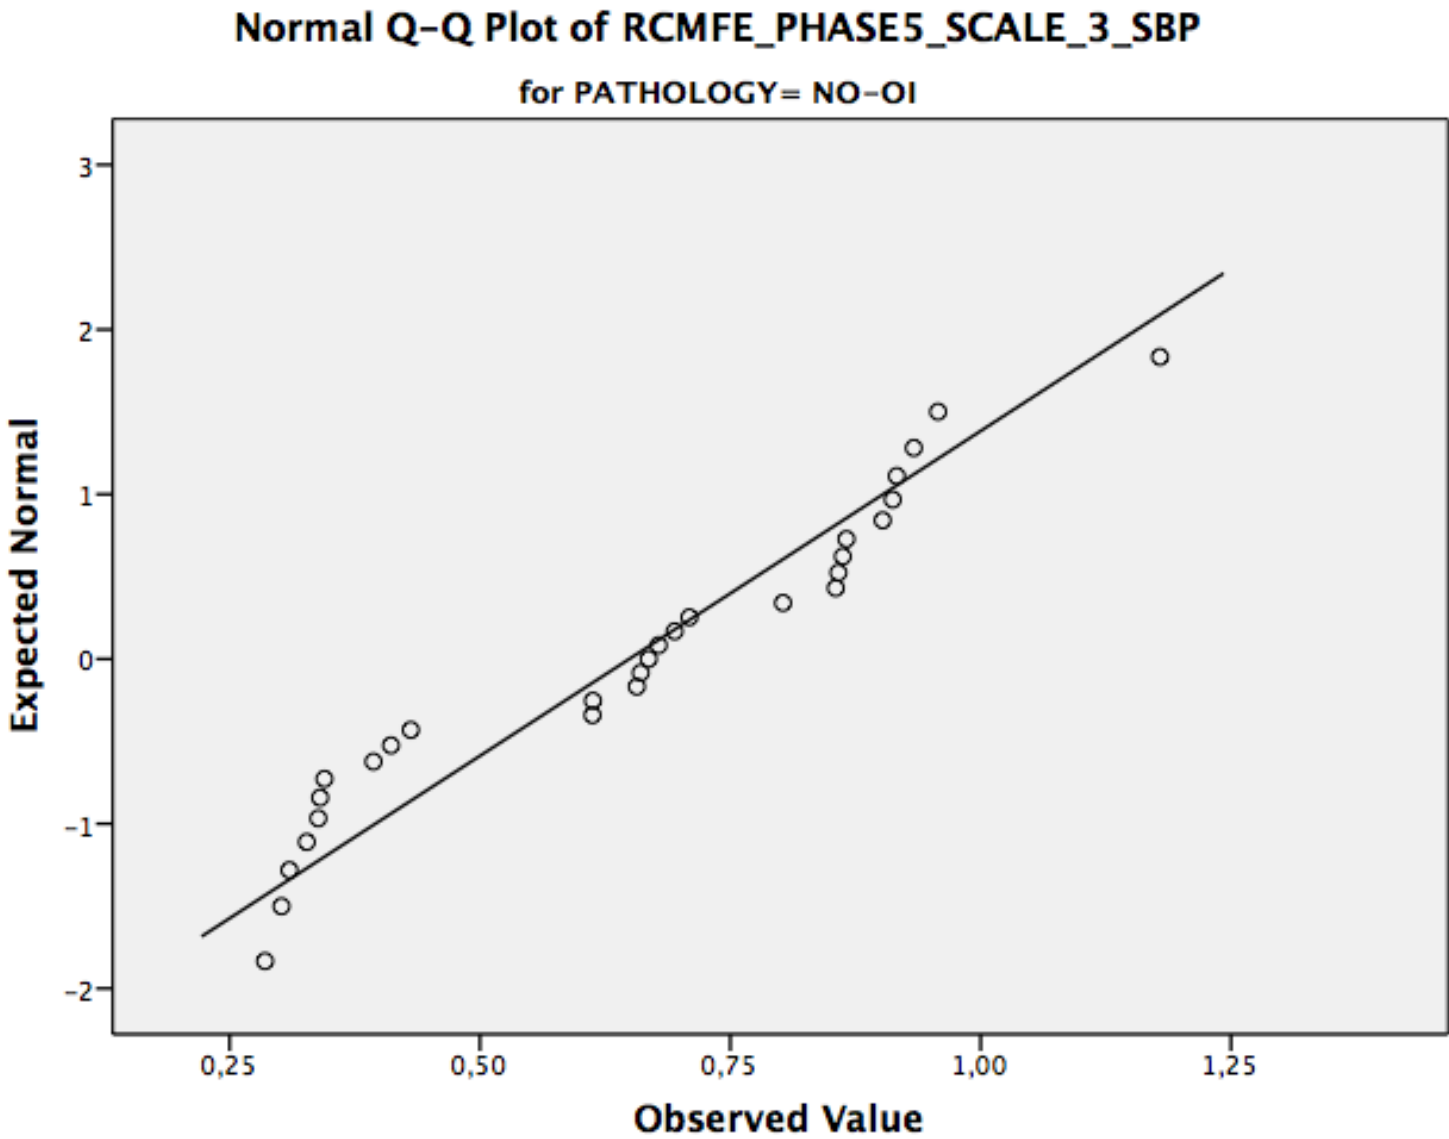

# Normal Q-Q Plot of RCMFE\_PHASE5\_SCALE\_3\_SBP

for PATHOLOGY= OI

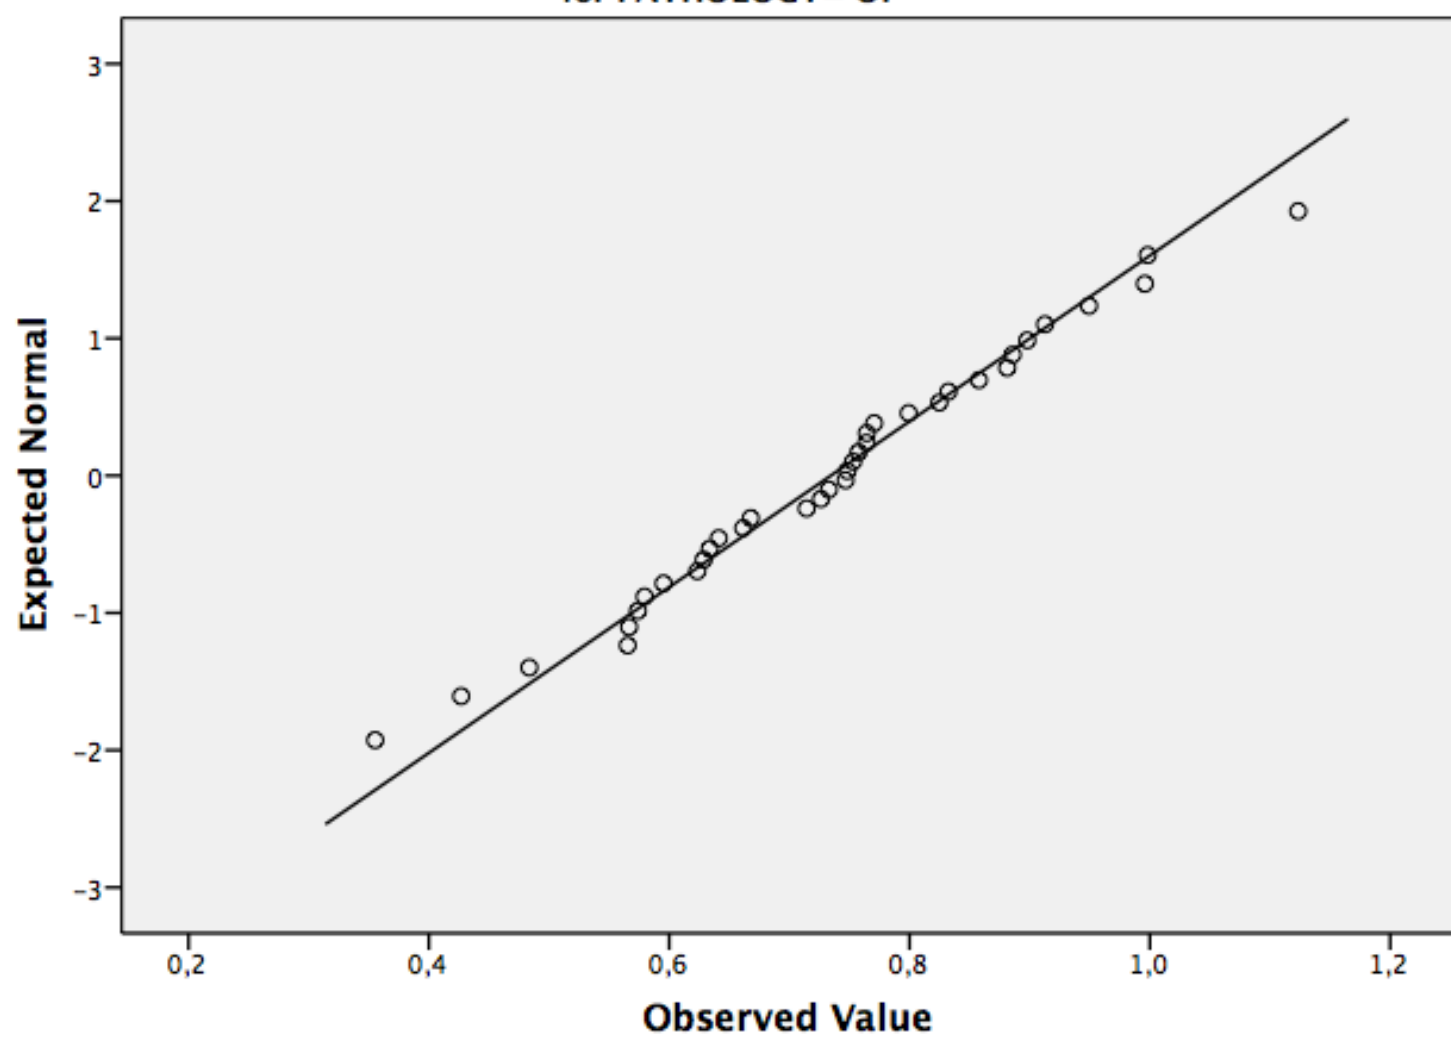

Normal Q-Q Plots

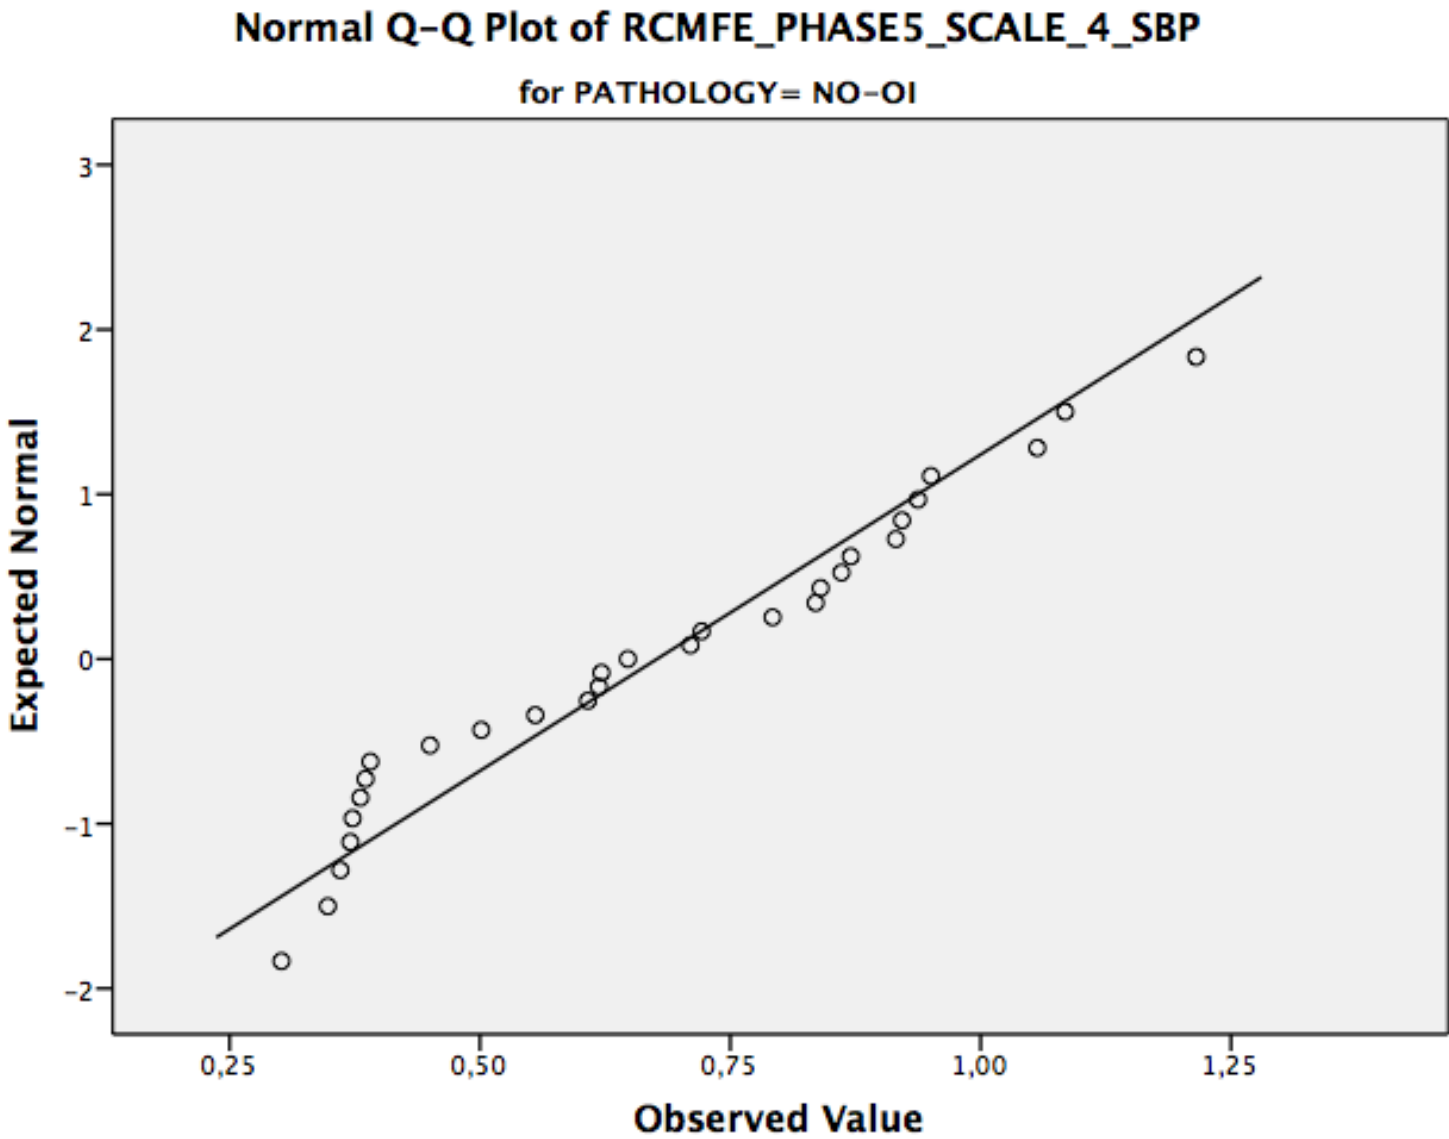

# Normal Q-Q Plot of RCMFE\_PHASE5\_SCALE\_4\_SBP

for PATHOLOGY= OI

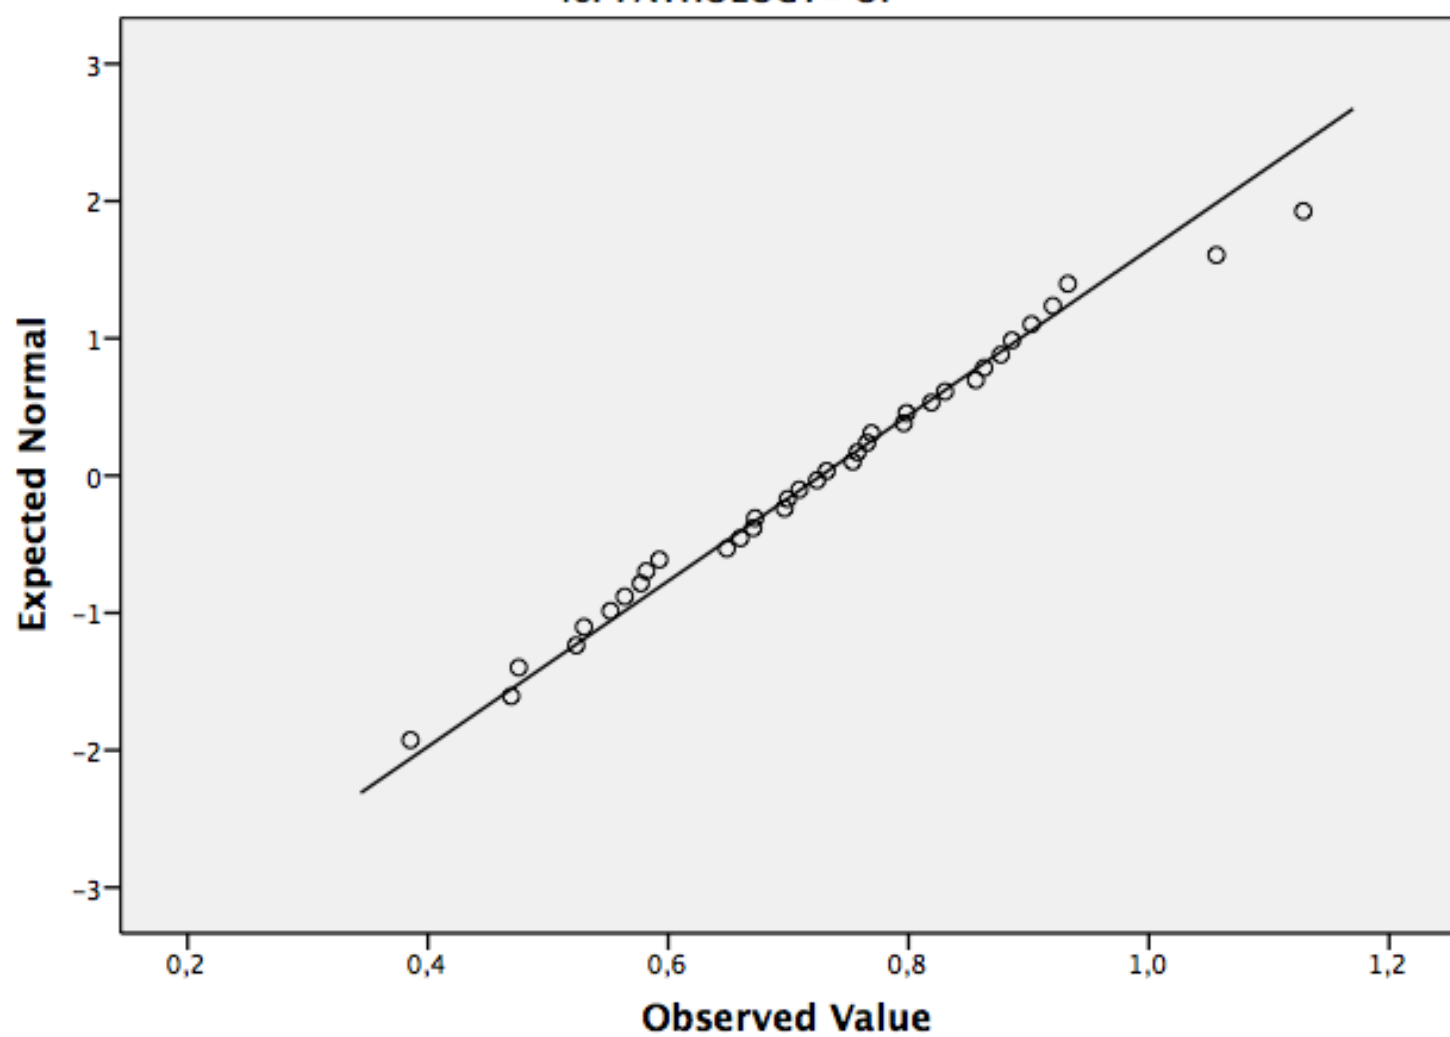

Normal Q-Q Plots

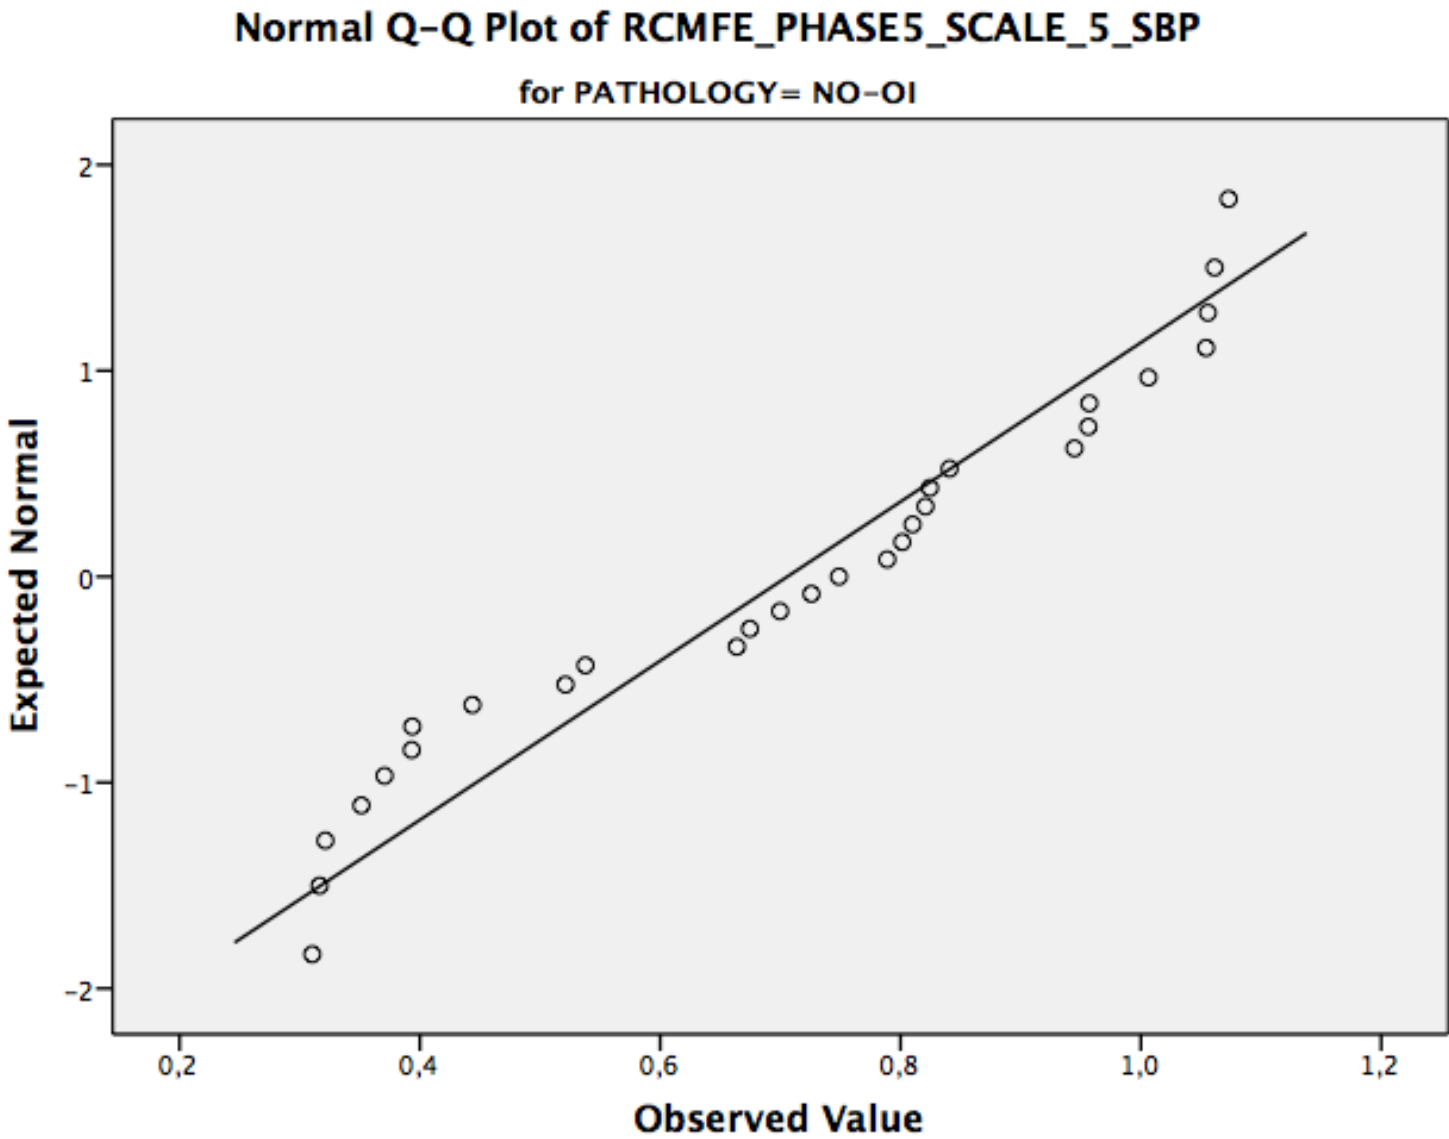

# Normal Q-Q Plot of RCMFE\_PHASE5\_SCALE\_5\_SBP

for PATHOLOGY= OI

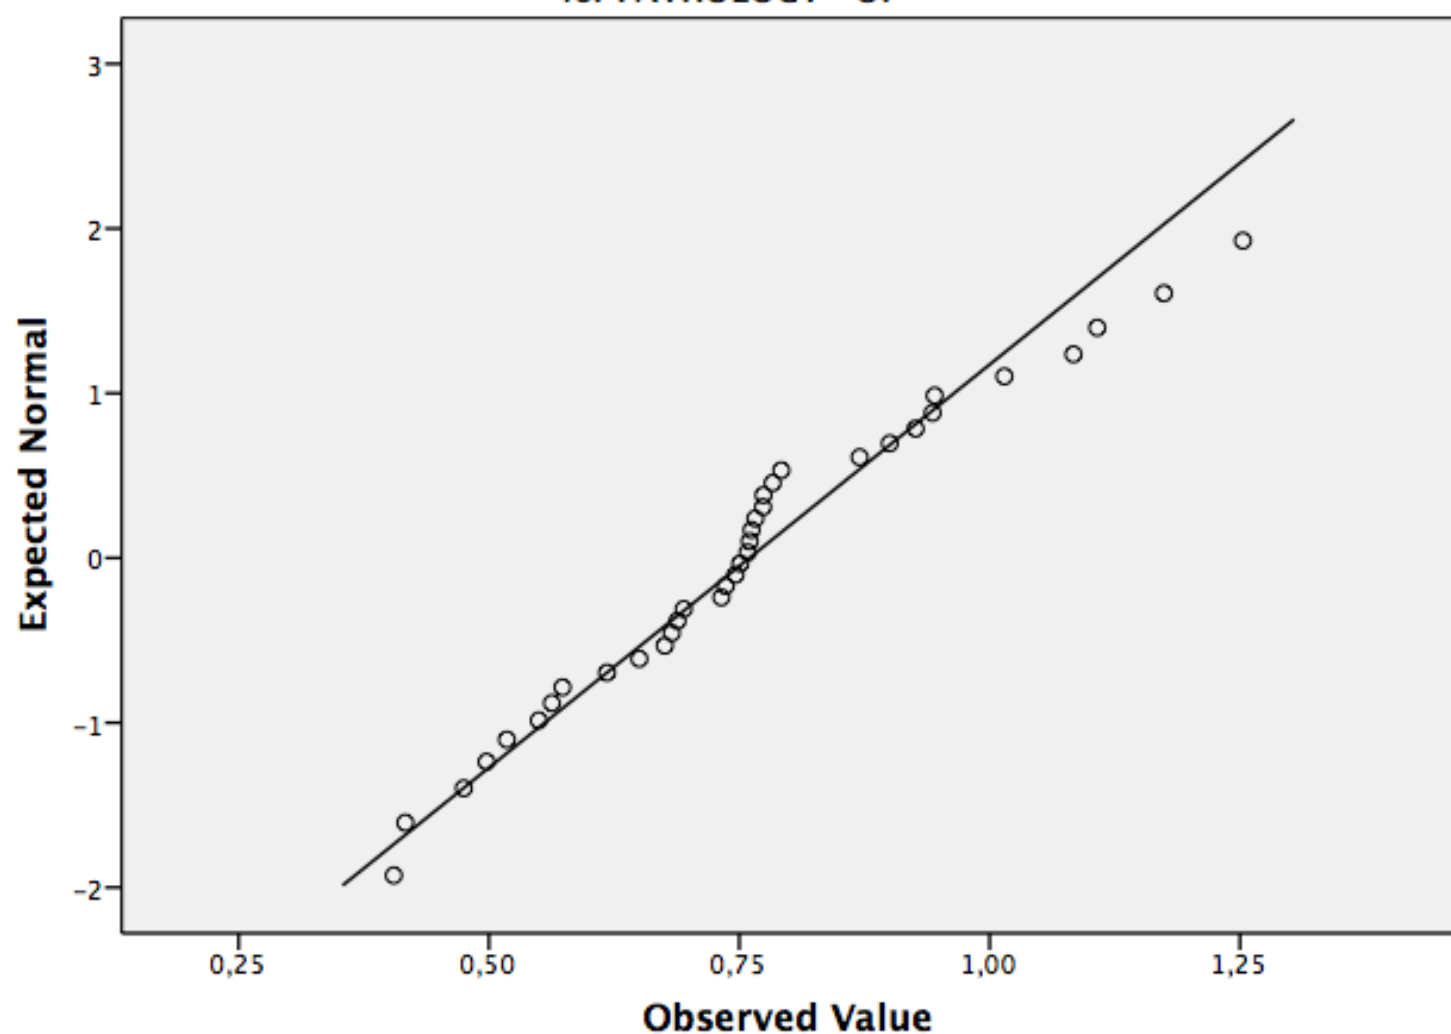

GENDER

Case Processing Summary

| GENDER                |       | Cases |         |         |         |       |         |
|-----------------------|-------|-------|---------|---------|---------|-------|---------|
|                       |       | Valid |         | Missing |         | Total |         |
|                       |       | N     | Percent | N       | Percent | N     | Percent |
| RCMFE_PHASE1_SCALE_1_ | WOMEN | 42    | 100,0%  | 0       | 0,0%    | 42    | 100,0%  |
| DBP                   | MEN   | 23    | 100,0%  | 0       | 0,0%    | 23    | 100,0%  |
| RCMFE_PHASE1_SCALE_2_ | WOMEN | 42    | 100,0%  | 0       | 0,0%    | 42    | 100,0%  |
| DBP                   | MEN   | 23    | 100,0%  | 0       | 0,0%    | 23    | 100,0%  |
| RCMFE_PHASE1_SCALE_3_ | WOMEN | 42    | 100,0%  | 0       | 0,0%    | 42    | 100,0%  |
| DBP                   | MEN   | 23    | 100,0%  | 0       | 0,0%    | 23    | 100,0%  |
| RCMFE_PHASE1_SCALE_4_ | WOMEN | 42    | 100,0%  | 0       | 0,0%    | 42    | 100,0%  |
| DBP                   | MEN   | 23    | 100,0%  | 0       | 0,0%    | 23    | 100,0%  |
| RCMFE_PHASE1_SCALE_5_ | WOMEN | 42    | 100,0%  | 0       | 0,0%    | 42    | 100,0%  |
| DBP                   | MEN   | 23    | 100,0%  | 0       | 0,0%    | 23    | 100,0%  |
| RCMFE_PHASE2_SCALE_1_ | WOMEN | 42    | 100,0%  | 0       | 0,0%    | 42    | 100,0%  |
| DBP                   | MEN   | 23    | 100,0%  | 0       | 0,0%    | 23    | 100,0%  |
| RCMFE_PHASE2_SCALE_2_ | WOMEN | 42    | 100,0%  | 0       | 0,0%    | 42    | 100,0%  |
| DBP                   | MEN   | 23    | 100,0%  | 0       | 0,0%    | 23    | 100,0%  |
| RCMFE_PHASE2_SCALE_3_ | WOMEN | 42    | 100,0%  | 0       | 0,0%    | 42    | 100,0%  |
| DBP                   | MEN   | 23    | 100,0%  | 0       | 0,0%    | 23    | 100,0%  |
| RCMFE_PHASE2_SCALE_4_ | WOMEN | 42    | 100,0%  | 0       | 0,0%    | 42    | 100,0%  |
| DBP                   | MEN   | 23    | 100,0%  | 0       | 0,0%    | 23    | 100,0%  |
| RCMFE_PHASE2_SCALE_5_ | WOMEN | 42    | 100,0%  | 0       | 0,0%    | 42    | 100,0%  |
| DBP                   | MEN   | 23    | 100,0%  | 0       | 0,0%    | 23    | 100,0%  |
| RCMFE_PHASE3_SCALE_1_ | WOMEN | 42    | 100,0%  | 0       | 0,0%    | 42    | 100,0%  |
| DBP                   | MEN   | 23    | 100,0%  | 0       | 0,0%    | 23    | 100,0%  |
| RCMFE_PHASE3_SCALE_2_ | WOMEN | 42    | 100,0%  | 0       | 0,0%    | 42    | 100,0%  |
| DBP                   | MEN   | 23    | 100,0%  | 0       | 0,0%    | 23    | 100,0%  |
| RCMFE_PHASE3_SCALE_3_ | WOMEN | 42    | 100,0%  | 0       | 0,0%    | 42    | 100,0%  |
| DBP                   | MEN   | 23    | 100,0%  | 0       | 0,0%    | 23    | 100,0%  |
| RCMFE_PHASE3_SCALE_4_ | WOMEN | 42    | 100,0%  | 0       | 0,0%    | 42    | 100,0%  |
| DBP                   | MEN   | 23    | 100,0%  | 0       | 0,0%    | 23    | 100,0%  |
| RCMFE_PHASE3_SCALE_5_ | WOMEN | 42    | 100,0%  | 0       | 0,0%    | 42    | 100,0%  |
| DBP                   | MEN   | 23    | 100,0%  | 0       | 0,0%    | 23    | 100,0%  |
| RCMFE_PHASE4_SCALE_1_ | WOMEN | 42    | 100,0%  | 0       | 0,0%    | 42    | 100,0%  |
| DBP                   | MEN   | 23    | 100,0%  | 0       | 0,0%    | 23    | 100,0%  |
| RCMFE_PHASE4_SCALE_2_ | WOMEN | 42    | 100,0%  | 0       | 0,0%    | 42    | 100,0%  |
| DBP                   | MEN   | 23    | 100,0%  | 0       | 0,0%    | 23    | 100,0%  |
| RCMFE_PHASE4_SCALE_3_ | WOMEN | 42    | 100,0%  | 0       | 0,0%    | 42    | 100,0%  |
| DBP                   | MEN   | 23    | 100,0%  | 0       | 0,0%    | 23    | 100,0%  |
| RCMFE_PHASE4_SCALE_4_ | WOMEN | 42    | 100,0%  | 0       | 0,0%    | 42    | 100,0%  |
| DBP                   | MEN   | 23    | 100,0%  | 0       | 0,0%    | 23    | 100,0%  |
| RCMFE_PHASE4_SCALE_5_ | WOMEN | 42    | 100,0%  | 0       | 0,0%    | 42    | 100,0%  |
| DBP                   | MEN   | 23    | 100,0%  | 0       | 0,0%    | 23    | 100,0%  |
| RCMFE_PHASE5_SCALE_1_ | WOMEN | 42    | 100,0%  | 0       | 0,0%    | 42    | 100,0%  |
| DBP                   |       |       |         |         |         |       |         |

### Case Processing Summary

| GENDER                |       | Cases |         |         |         |       |         |
|-----------------------|-------|-------|---------|---------|---------|-------|---------|
|                       |       | Valid |         | Missing |         | Total |         |
|                       |       | N     | Percent | N       | Percent | N     | Percent |
| RCMFE_PHASE5_SCALE_1_ | MEN   | 23    | 100,0%  | 0       | 0,0%    | 23    | 100,0%  |
| DBP                   |       |       |         |         |         |       |         |
| RCMFE_PHASE5_SCALE_2_ | WOMEN | 42    | 100,0%  | 0       | 0,0%    | 42    | 100,0%  |
| DBP                   |       |       |         |         |         |       |         |
|                       | MEN   | 23    | 100,0%  | 0       | 0,0%    | 23    | 100,0%  |
| RCMFE_PHASE5_SCALE_3_ | WOMEN | 42    | 100,0%  | 0       | 0,0%    | 42    | 100,0%  |
| DBP                   |       |       |         |         |         |       |         |
|                       | MEN   | 23    | 100,0%  | 0       | 0,0%    | 23    | 100,0%  |
| RCMFE_PHASE5_SCALE_4_ | WOMEN | 42    | 100,0%  | 0       | 0,0%    | 42    | 100,0%  |
| DBP                   |       |       |         |         |         |       |         |
|                       | MEN   | 23    | 100,0%  | 0       | 0,0%    | 23    | 100,0%  |
| RCMFE_PHASE5_SCALE_5_ | WOMEN | 42    | 100,0%  | 0       | 0,0%    | 42    | 100,0%  |
| DBP                   |       |       |         |         |         |       |         |
|                       | MEN   | 23    | 100,0%  | 0       | 0,0%    | 23    | 100,0%  |

### Tests of Normality

| GENDER                |       | Kolmogorov-Smirnov <sup>a</sup> |    |       | Shapiro-Wilk |    |      |
|-----------------------|-------|---------------------------------|----|-------|--------------|----|------|
|                       |       | Statistic                       | df | Sig.  | Statistic    | df | Sig. |
| RCMFE_PHASE1_SCALE_1_ | WOMEN | ,092                            | 42 | ,200* | ,969         | 42 | ,301 |
| DBP                   |       |                                 |    |       |              |    |      |
|                       | MEN   | ,158                            | 23 | ,141  | ,961         | 23 | ,484 |
| RCMFE_PHASE1_SCALE_2_ | WOMEN | ,099                            | 42 | ,200* | ,978         | 42 | ,578 |
| DBP                   |       |                                 |    |       |              |    |      |
|                       | MEN   | ,168                            | 23 | ,093  | ,945         | 23 | ,227 |
| RCMFE_PHASE1_SCALE_3_ | WOMEN | ,114                            | 42 | ,197  | ,969         | 42 | ,295 |
| DBP                   |       |                                 |    |       |              |    |      |
|                       | MEN   | ,129                            | 23 | ,200* | ,952         | 23 | ,315 |
| RCMFE_PHASE1_SCALE_4_ | WOMEN | ,092                            | 42 | ,200* | ,952         | 42 | ,077 |
| DBP                   |       |                                 |    |       |              |    |      |
|                       | MEN   | ,145                            | 23 | ,200* | ,956         | 23 | ,382 |
| RCMFE_PHASE1_SCALE_5_ | WOMEN | ,106                            | 42 | ,200* | ,944         | 42 | ,051 |
| DBP                   |       |                                 |    |       |              |    |      |
|                       | MEN   | ,069                            | 23 | ,200* | ,984         | 23 | ,963 |
| RCMFE_PHASE2_SCALE_1_ | WOMEN | ,104                            | 42 | ,200* | ,970         | 42 | ,336 |
| DBP                   |       |                                 |    |       |              |    |      |
|                       | MEN   | ,093                            | 23 | ,200* | ,967         | 23 | ,624 |
| RCMFE_PHASE2_SCALE_2_ | WOMEN | ,117                            | 42 | ,170  | ,957         | 42 | ,117 |
| DBP                   |       |                                 |    |       |              |    |      |
|                       | MEN   | ,115                            | 23 | ,200* | ,955         | 23 | ,368 |
| RCMFE_PHASE2_SCALE_3_ | WOMEN | ,092                            | 42 | ,200* | ,980         | 42 | ,657 |
| DBP                   |       |                                 |    |       |              |    |      |
|                       | MEN   | ,103                            | 23 | ,200* | ,973         | 23 | ,767 |
| RCMFE_PHASE2_SCALE_4_ | WOMEN | ,079                            | 42 | ,200* | ,975         | 42 | ,467 |
| DBP                   |       |                                 |    |       |              |    |      |
|                       | MEN   | ,071                            | 23 | ,200* | ,974         | 23 | ,789 |
| RCMFE_PHASE2_SCALE_5_ | WOMEN | ,068                            | 42 | ,200* | ,987         | 42 | ,912 |
| DBP                   |       |                                 |    |       |              |    |      |
|                       | MEN   | ,088                            | 23 | ,200* | ,990         | 23 | ,996 |
| RCMFE_PHASE3_SCALE_1_ | WOMEN | ,124                            | 42 | ,103  | ,957         | 42 | ,115 |
| DBP                   |       |                                 |    |       |              |    |      |
|                       | MEN   | ,107                            | 23 | ,200* | ,972         | 23 | ,733 |
| RCMFE_PHASE3_SCALE_2_ | WOMEN | ,090                            | 42 | ,200* | ,949         | 42 | ,059 |
| DBP                   |       |                                 |    |       |              |    |      |
|                       | MEN   | ,157                            | 23 | ,146  | ,956         | 23 | ,388 |
| RCMFE_PHASE3_SCALE_3_ | WOMEN | ,088                            | 42 | ,200* | ,977         | 42 | ,566 |
| DBP                   |       |                                 |    |       |              |    |      |
|                       | MEN   | ,075                            | 23 | ,200* | ,979         | 23 | ,894 |
| RCMFE_PHASE3_SCALE_4_ | WOMEN | ,066                            | 42 | ,200* | ,990         | 42 | ,964 |
| DBP                   |       |                                 |    |       |              |    |      |
|                       | MEN   | ,080                            | 23 | ,200* | ,987         | 23 | ,988 |
| RCMFE_PHASE3_SCALE_5_ | WOMEN | ,072                            | 42 | ,200* | ,967         | 42 | ,271 |



|                       |       |      |    |       |      |    |      |
|-----------------------|-------|------|----|-------|------|----|------|
| DBP                   | MEN   | ,149 | 23 | ,200* | ,955 | 23 | ,377 |
| RCMFE_PHASE4_SCALE_1_ | WOMEN | ,170 | 42 | ,034  | ,905 | 42 | ,052 |
| DBP                   | MEN   | ,123 | 23 | ,200* | ,963 | 23 | ,520 |
| RCMFE_PHASE4_SCALE_2_ | WOMEN | ,109 | 42 | ,200* | ,916 | 42 | ,005 |
| DBP                   | MEN   | ,134 | 23 | ,200* | ,970 | 23 | ,685 |
| RCMFE_PHASE4_SCALE_3_ | WOMEN | ,125 | 42 | ,096  | ,935 | 42 | ,020 |
|                       | MEN   | ,159 | 23 | ,135  | ,956 | 23 | ,393 |
| RCMFE_PHASE4_SCALE_4_ | WOMEN | ,111 | 42 | ,200* | ,976 | 42 | ,519 |
| DBP                   | MEN   | ,108 | 23 | ,200* | ,969 | 23 | ,666 |
| RCMFE_PHASE4_SCALE_5_ | WOMEN | ,077 | 42 | ,200* | ,975 | 42 | ,479 |
| DBP                   | MEN   | ,108 | 23 | ,200* | ,973 | 23 | ,769 |
| RCMFE_PHASE5_SCALE_1_ | WOMEN | ,078 | 42 | ,200* | ,978 | 42 | ,571 |
| DBP                   | MEN   | ,105 | 23 | ,200* | ,981 | 23 | ,929 |

#### Tests of Normality

| GENDER                      | Kolmogorov-Smirnov <sup>a</sup> |    |       | Shapiro-Wilk |    |      |
|-----------------------------|---------------------------------|----|-------|--------------|----|------|
|                             | Statistic                       | df | Sig.  | Statistic    | df | Sig. |
| RCMFE_PHASE5_SCALE_2_ WOMEN | ,119                            | 42 | ,142* | ,924         | 42 | ,008 |
| DBP MEN                     | ,125                            | 23 | ,200  | ,922         | 23 | ,074 |
| RCMFE_PHASE5_SCALE_3_ WOMEN | ,149                            | 42 | ,020* | ,936         | 42 | ,021 |
| DBP MEN                     | ,164                            | 23 | ,111  | ,932         | 23 | ,121 |
| RCMFE_PHASE5_SCALE_4_ WOMEN | ,098                            | 42 | ,200  | ,974         | 42 | ,440 |
| DBP MEN                     | ,080                            | 23 | ,200* | ,983         | 23 | ,950 |
| RCMFE_PHASE5_SCALE_5_ WOMEN | ,092                            | 42 | ,200* | ,977         | 42 | ,542 |
| DBP MEN                     | ,104                            | 23 | ,200* | ,986         | 23 | ,977 |

\*. This is a lower bound of the true significance.

a. Lilliefors Significance Correction

Normal Q-Q Plots

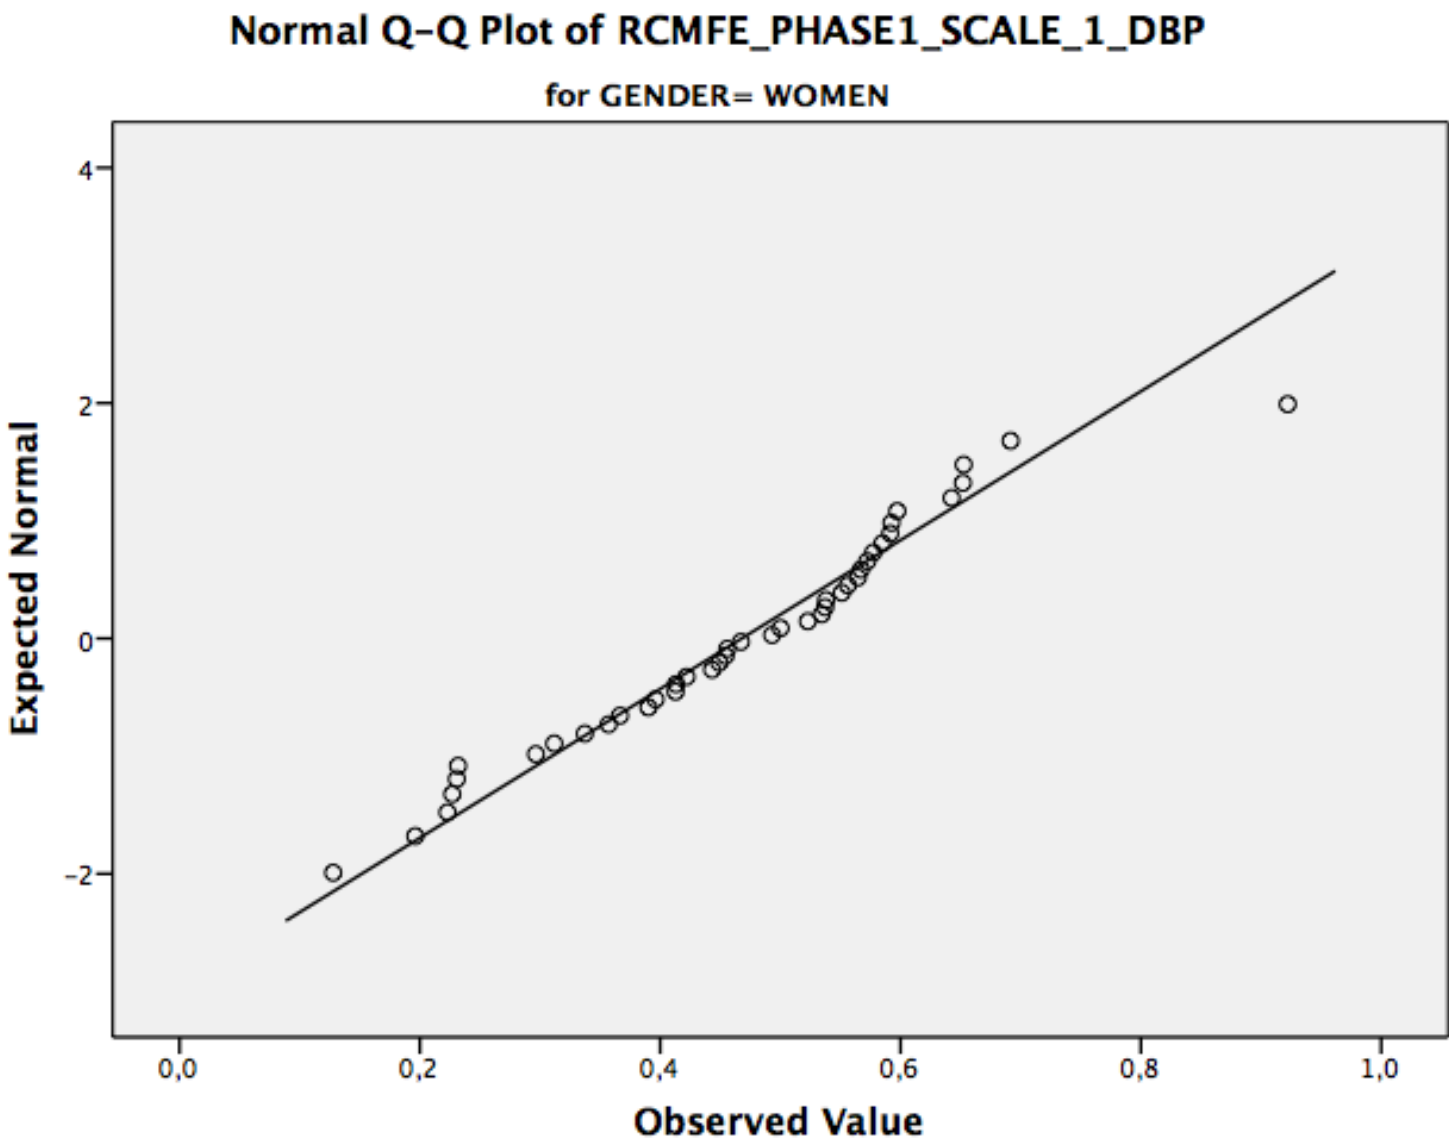

# Normal Q-Q Plot of RCMFE\_PHASE1\_SCALE\_1\_DBP

for GENDER= MEN

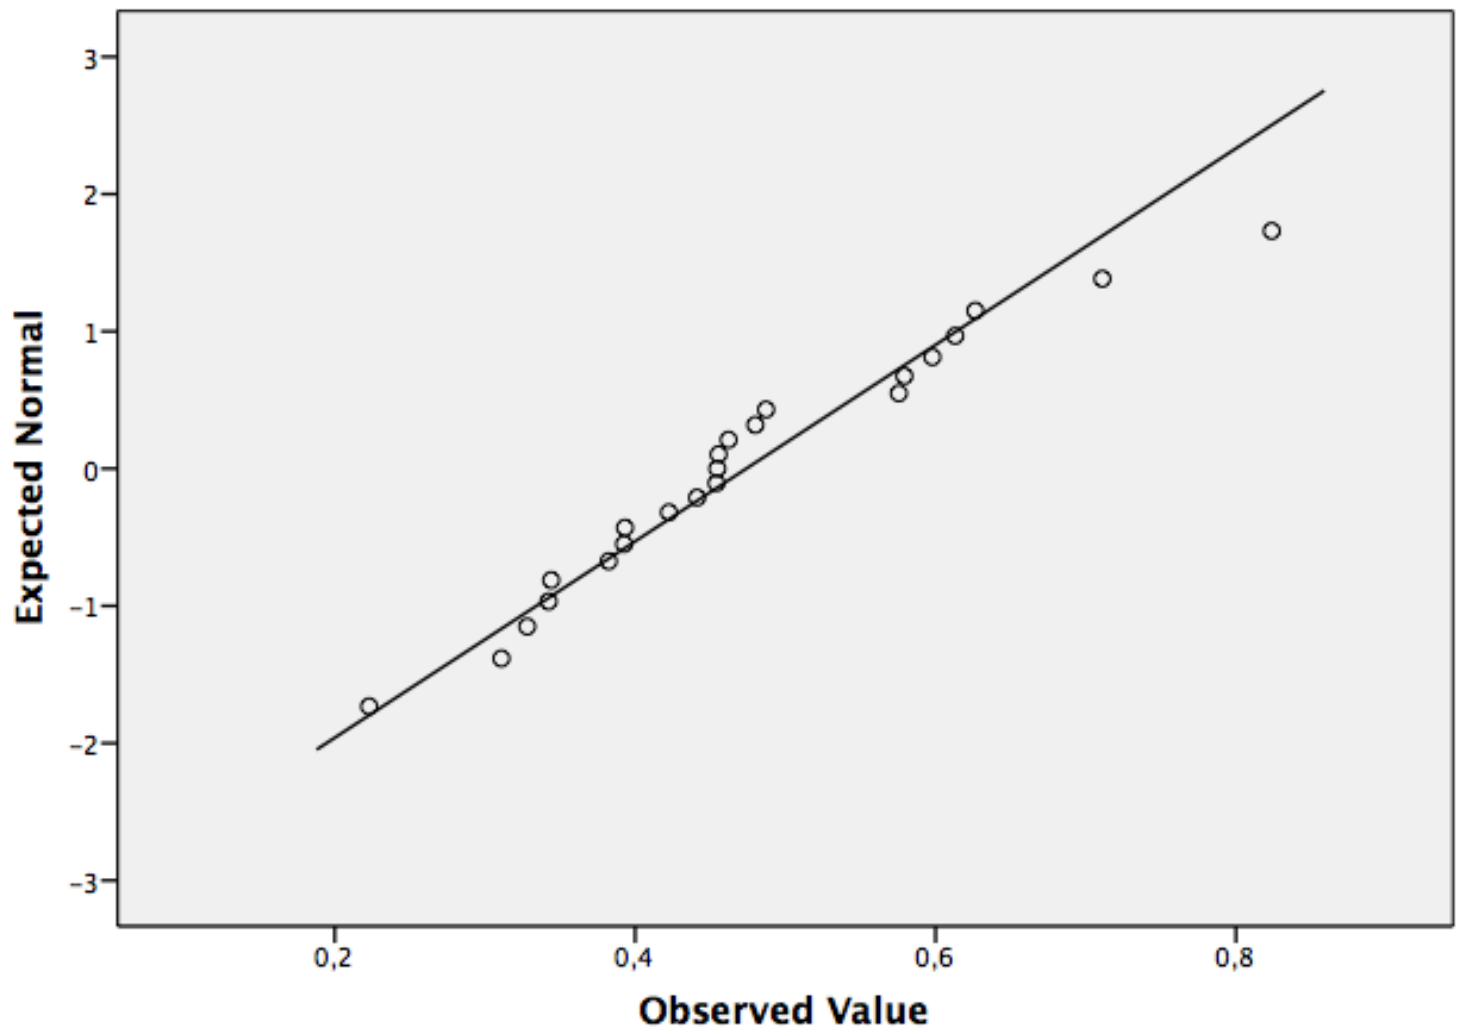

Normal Q-Q Plots

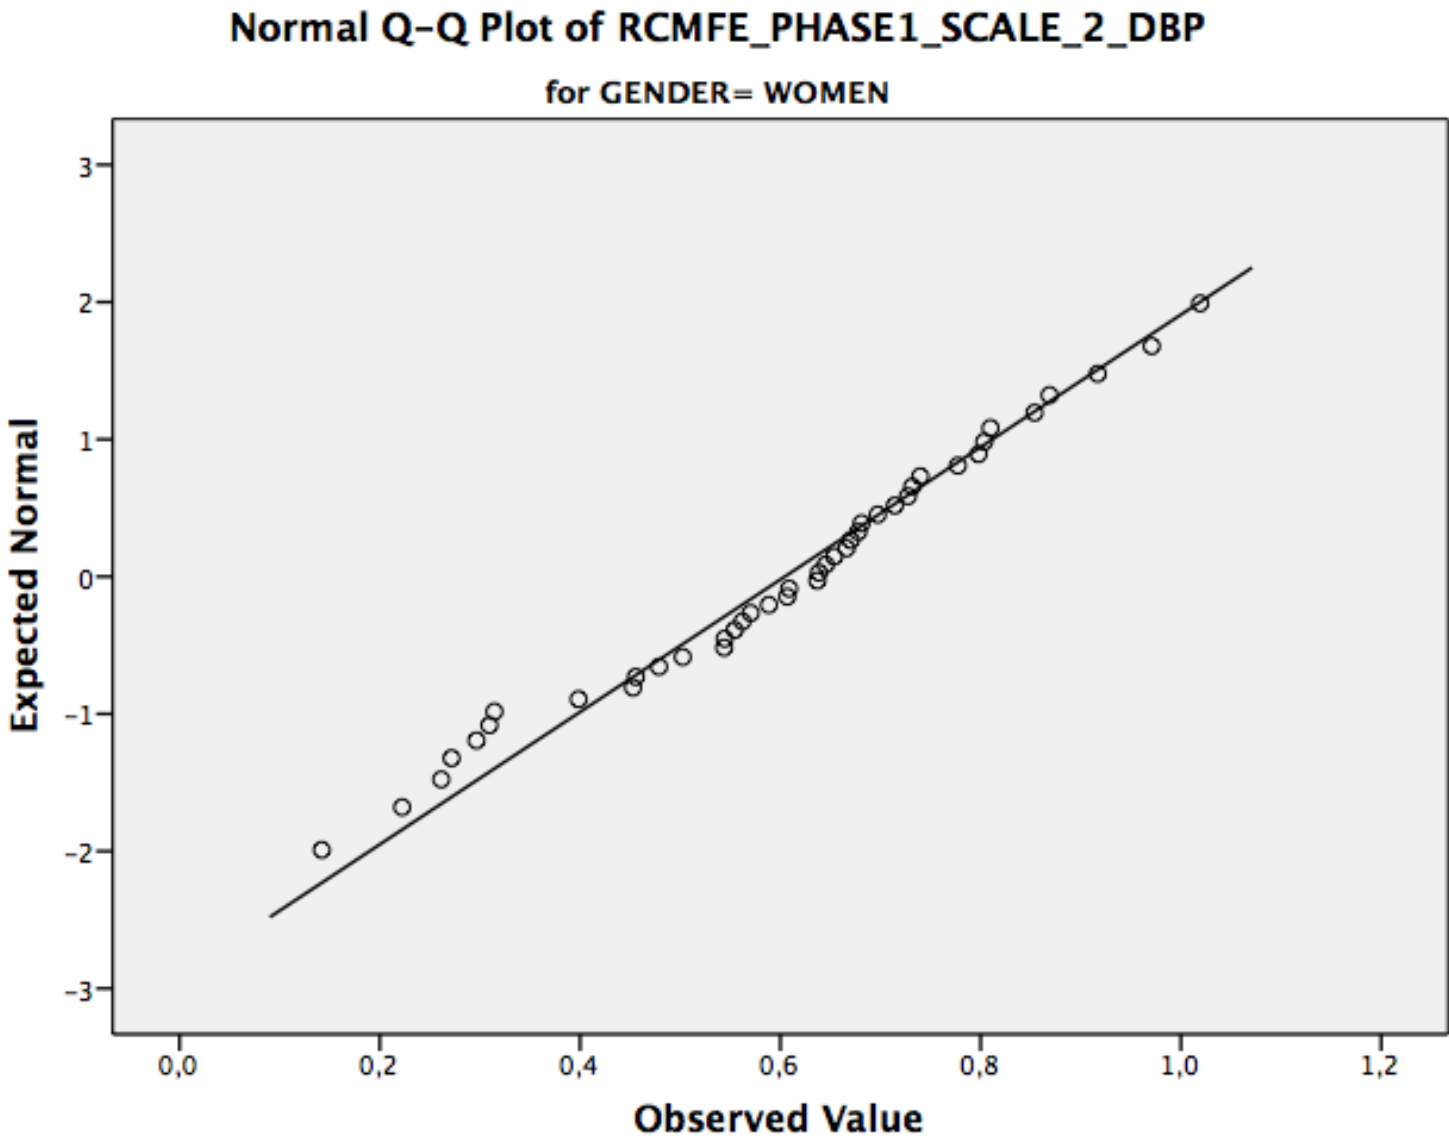

# Normal Q-Q Plot of RCMFE\_PHASE1\_SCALE\_2\_DBP

for GENDER= MEN

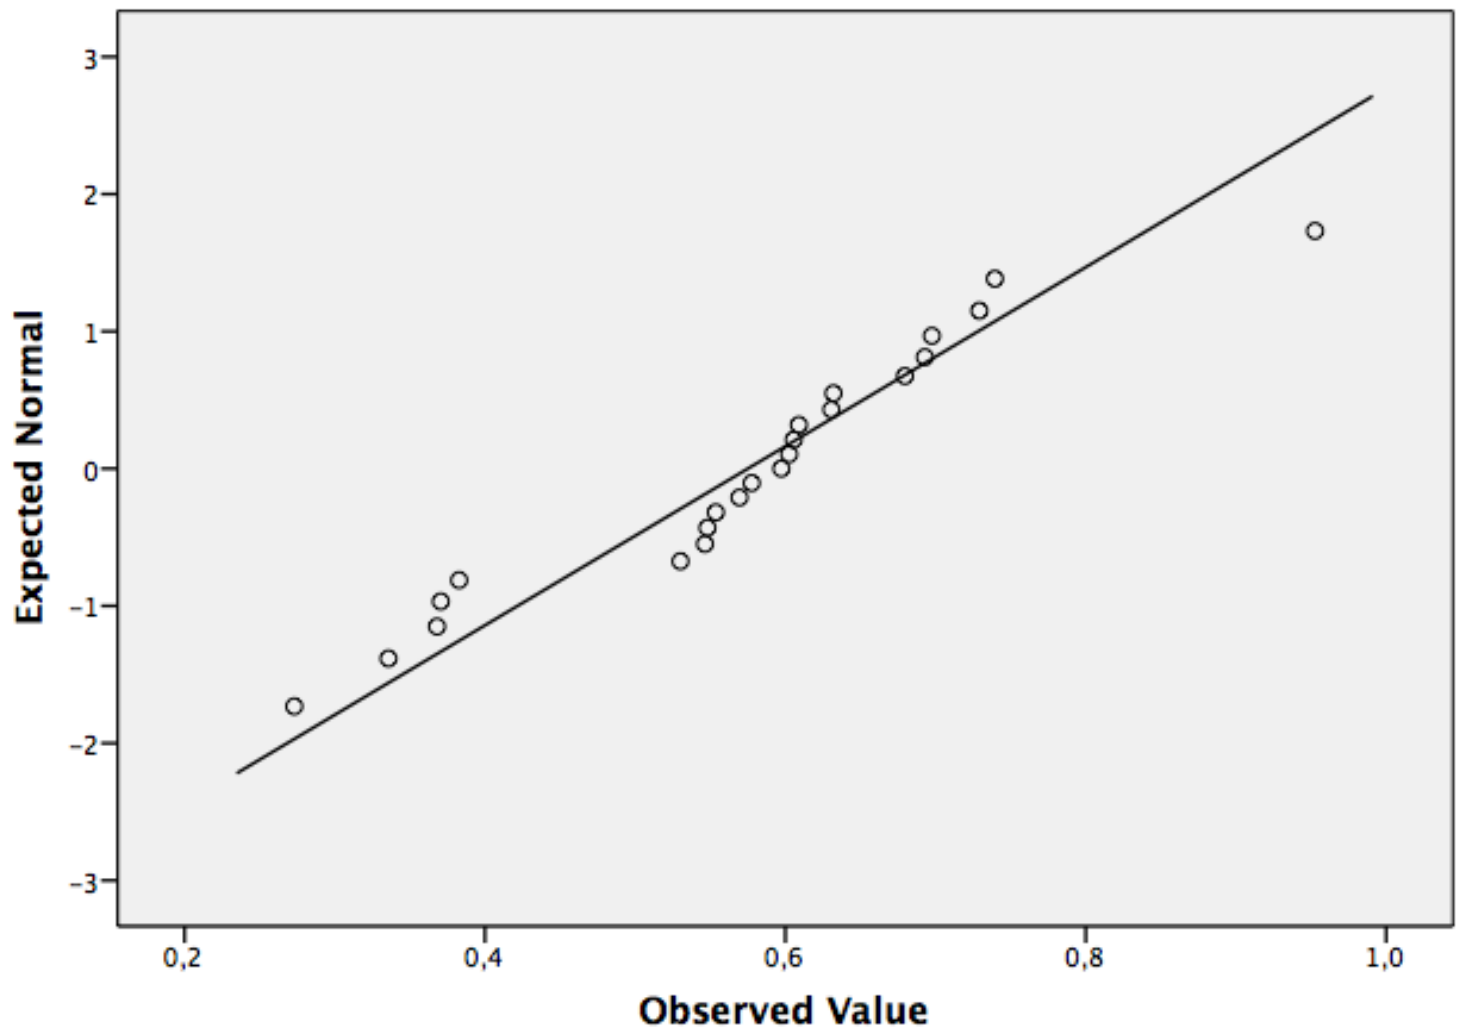

Normal Q-Q Plots

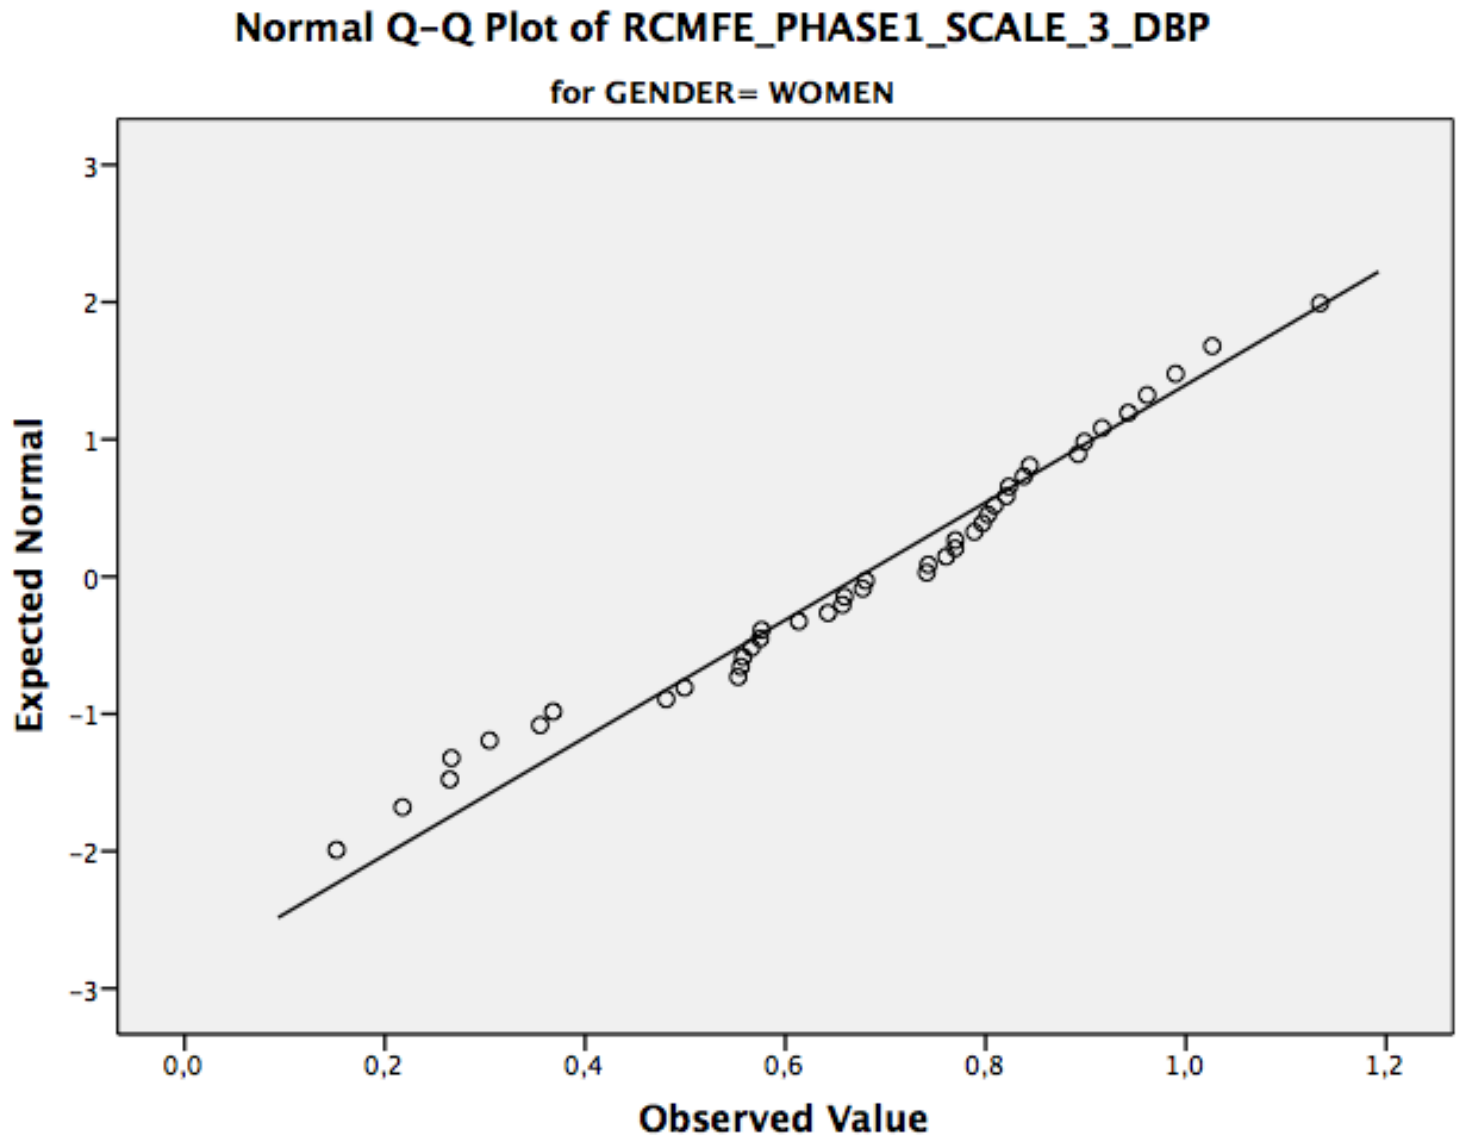

# Normal Q-Q Plot of RCMFE\_PHASE1\_SCALE\_3\_DBP

for GENDER= MEN

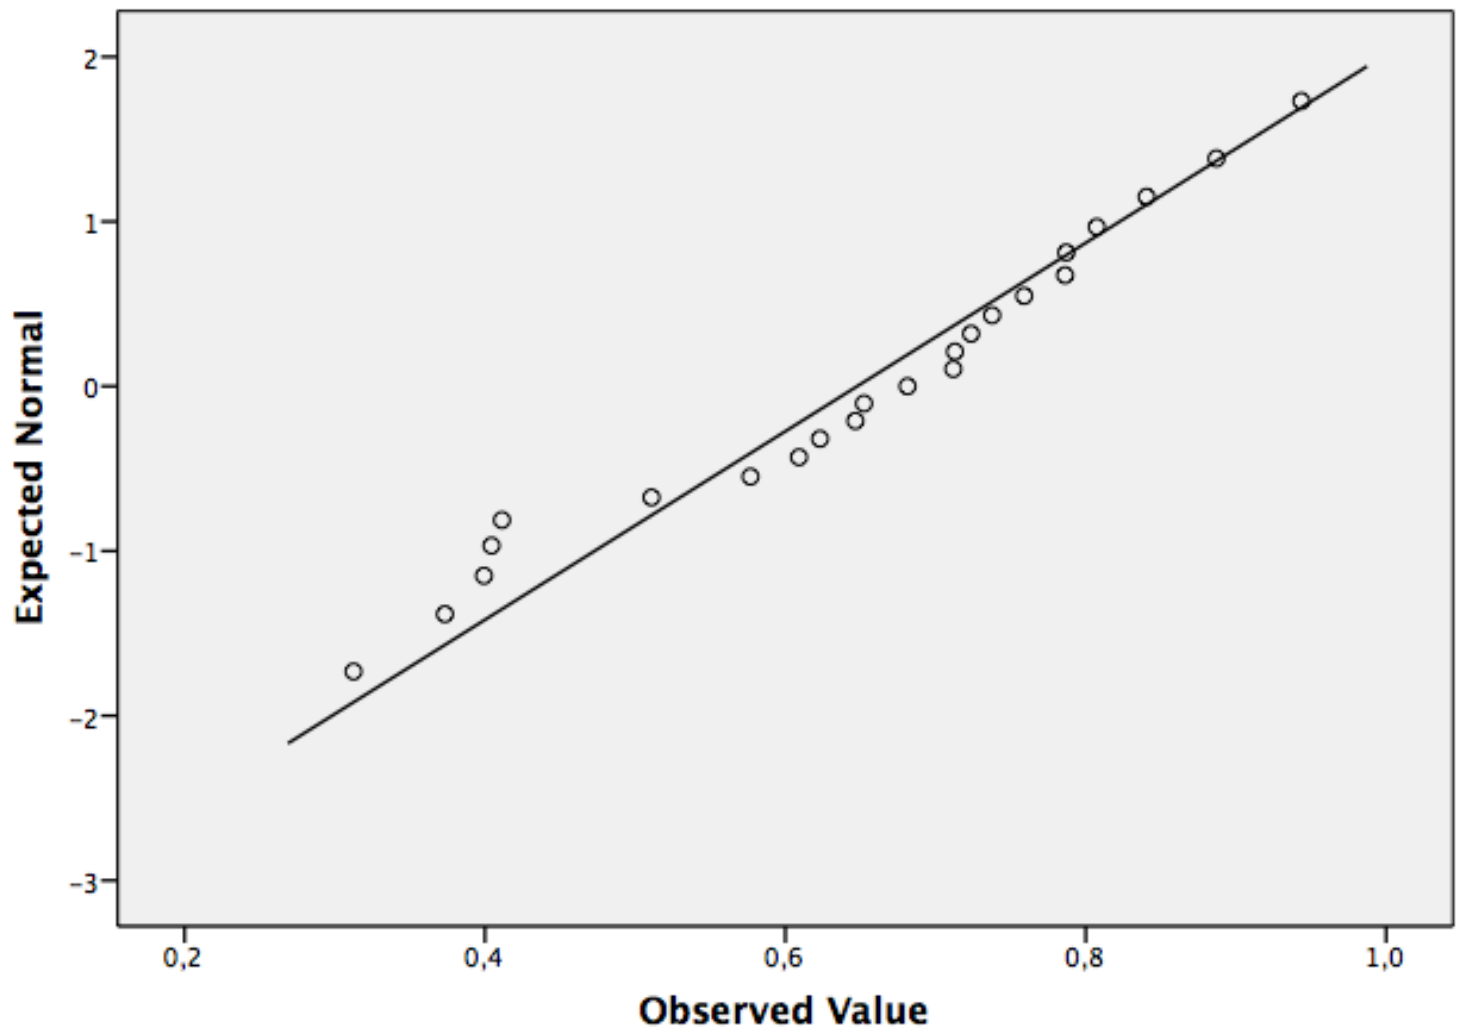

Normal Q-Q Plots

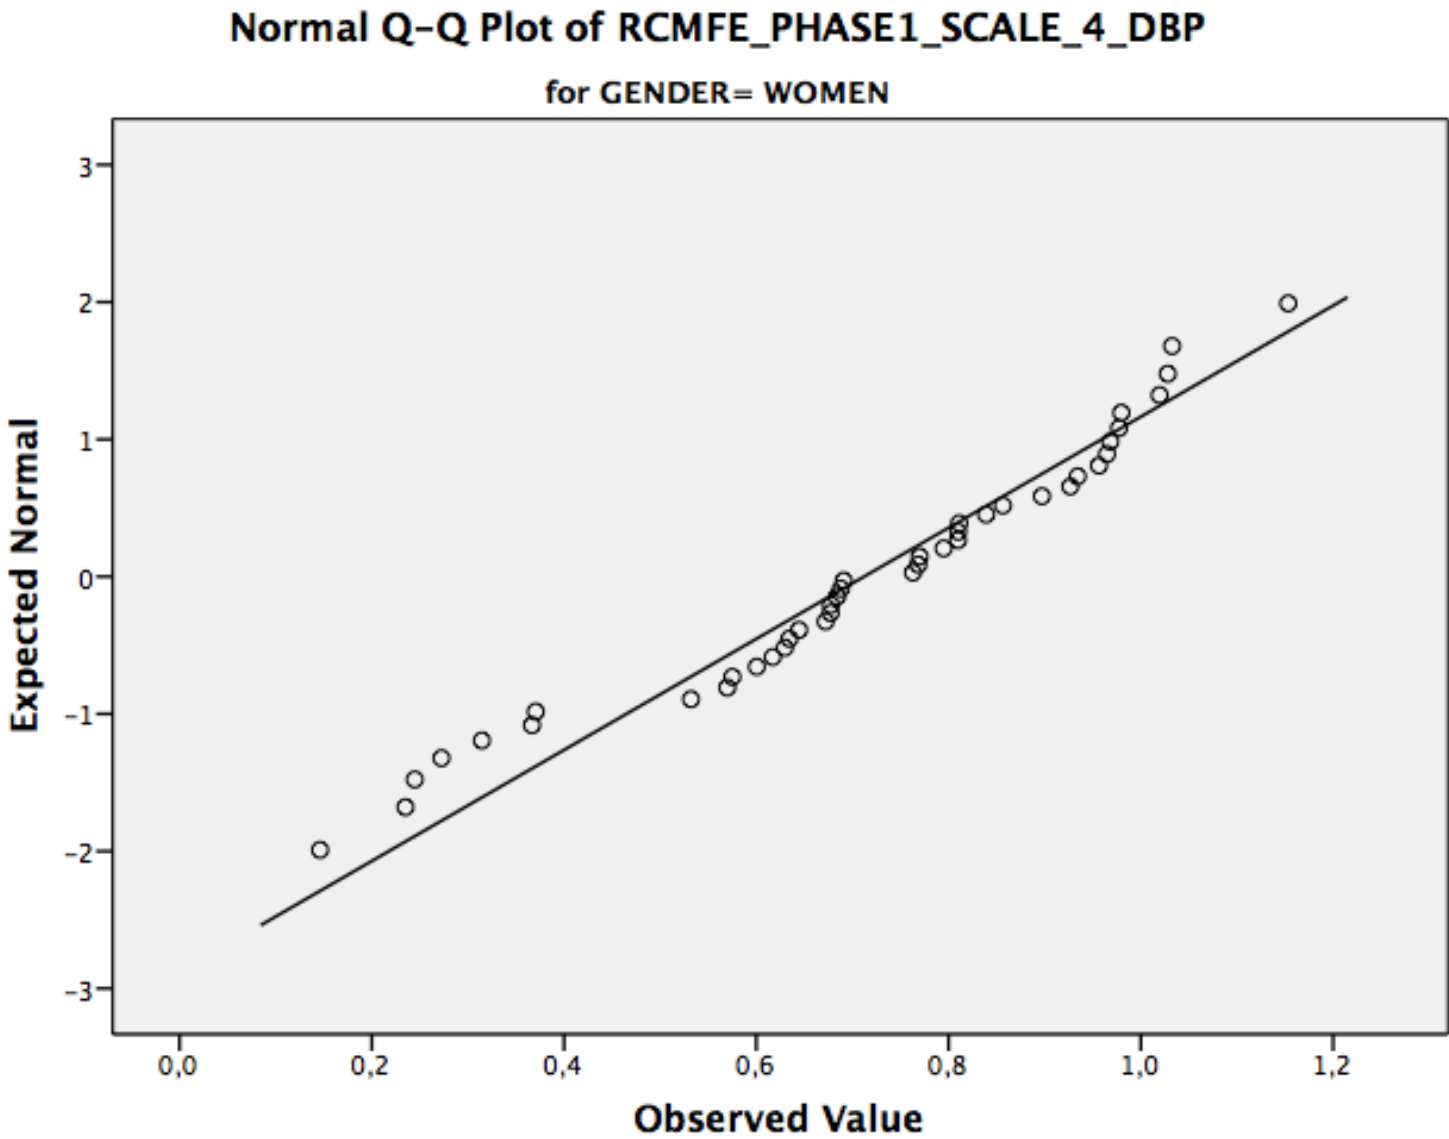



# Normal Q-Q Plot of RCMFE\_PHASE1\_SCALE\_4\_DBP

for GENDER= MEN

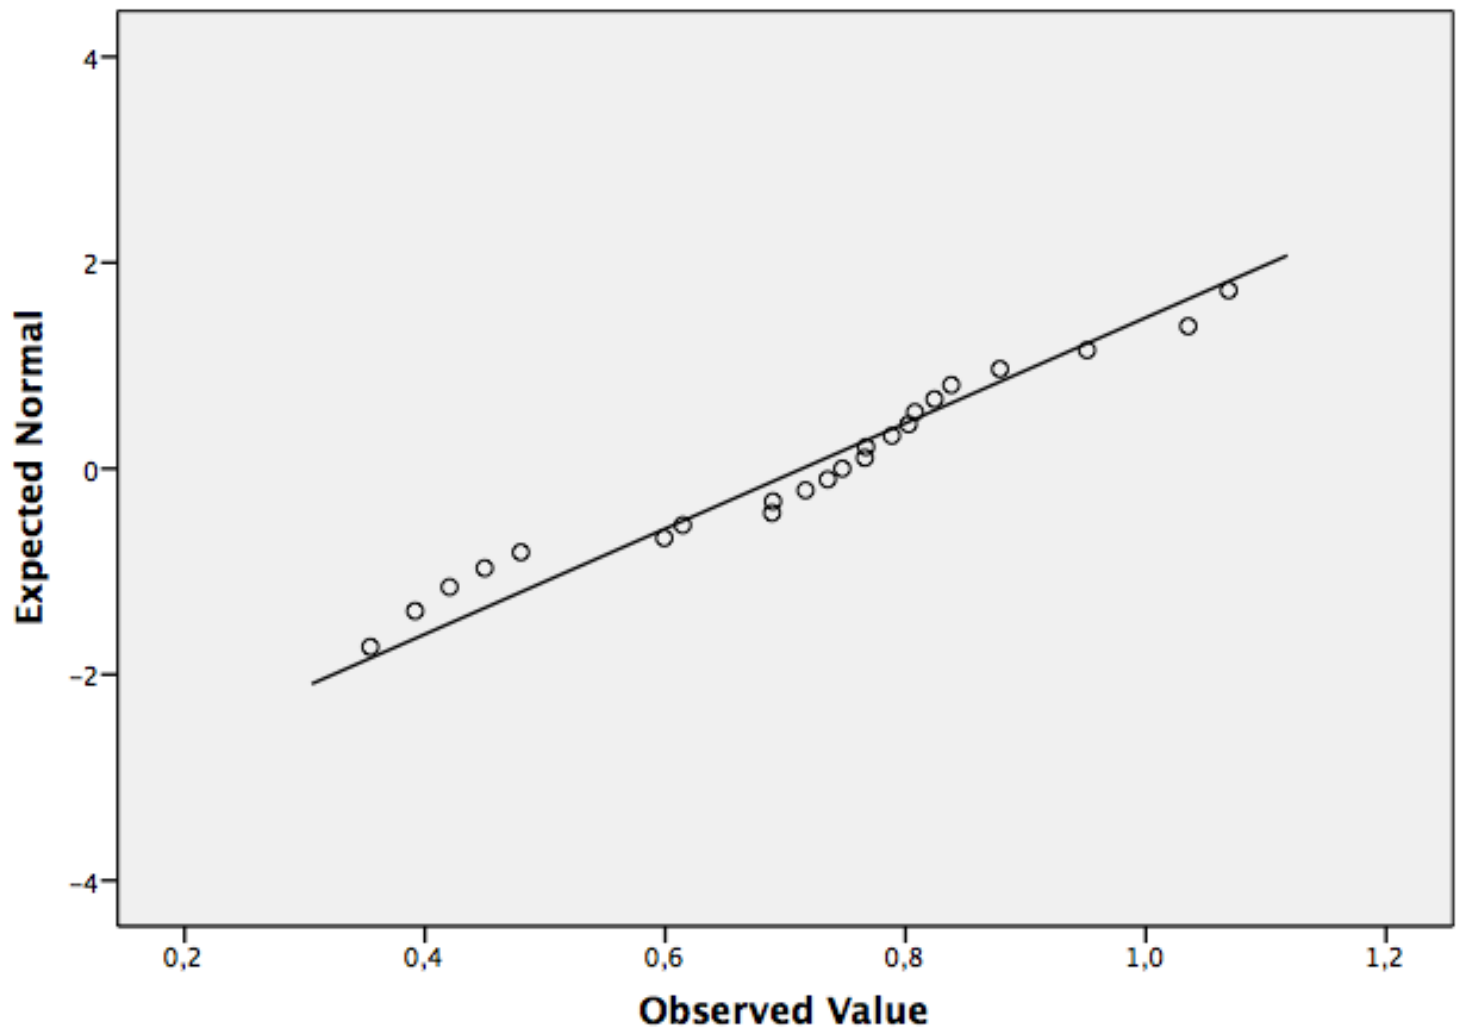

Normal Q-Q Plots

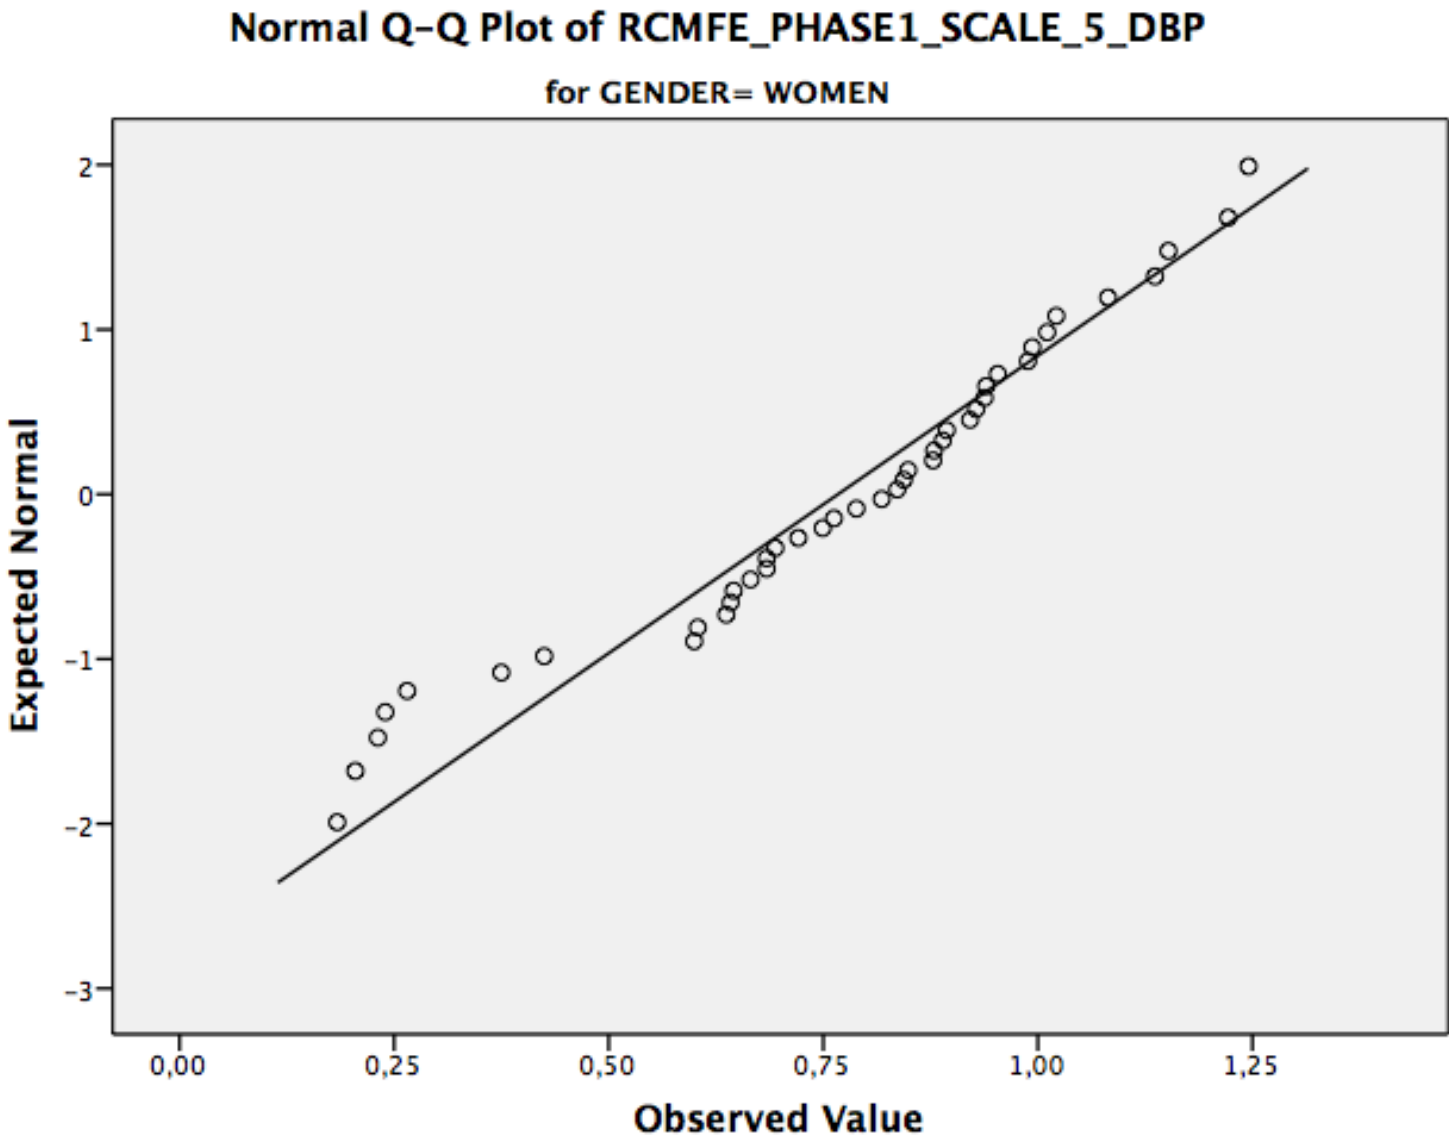

# Normal Q-Q Plot of RCMFE\_PHASE1\_SCALE\_5\_DBP

for GENDER= MEN

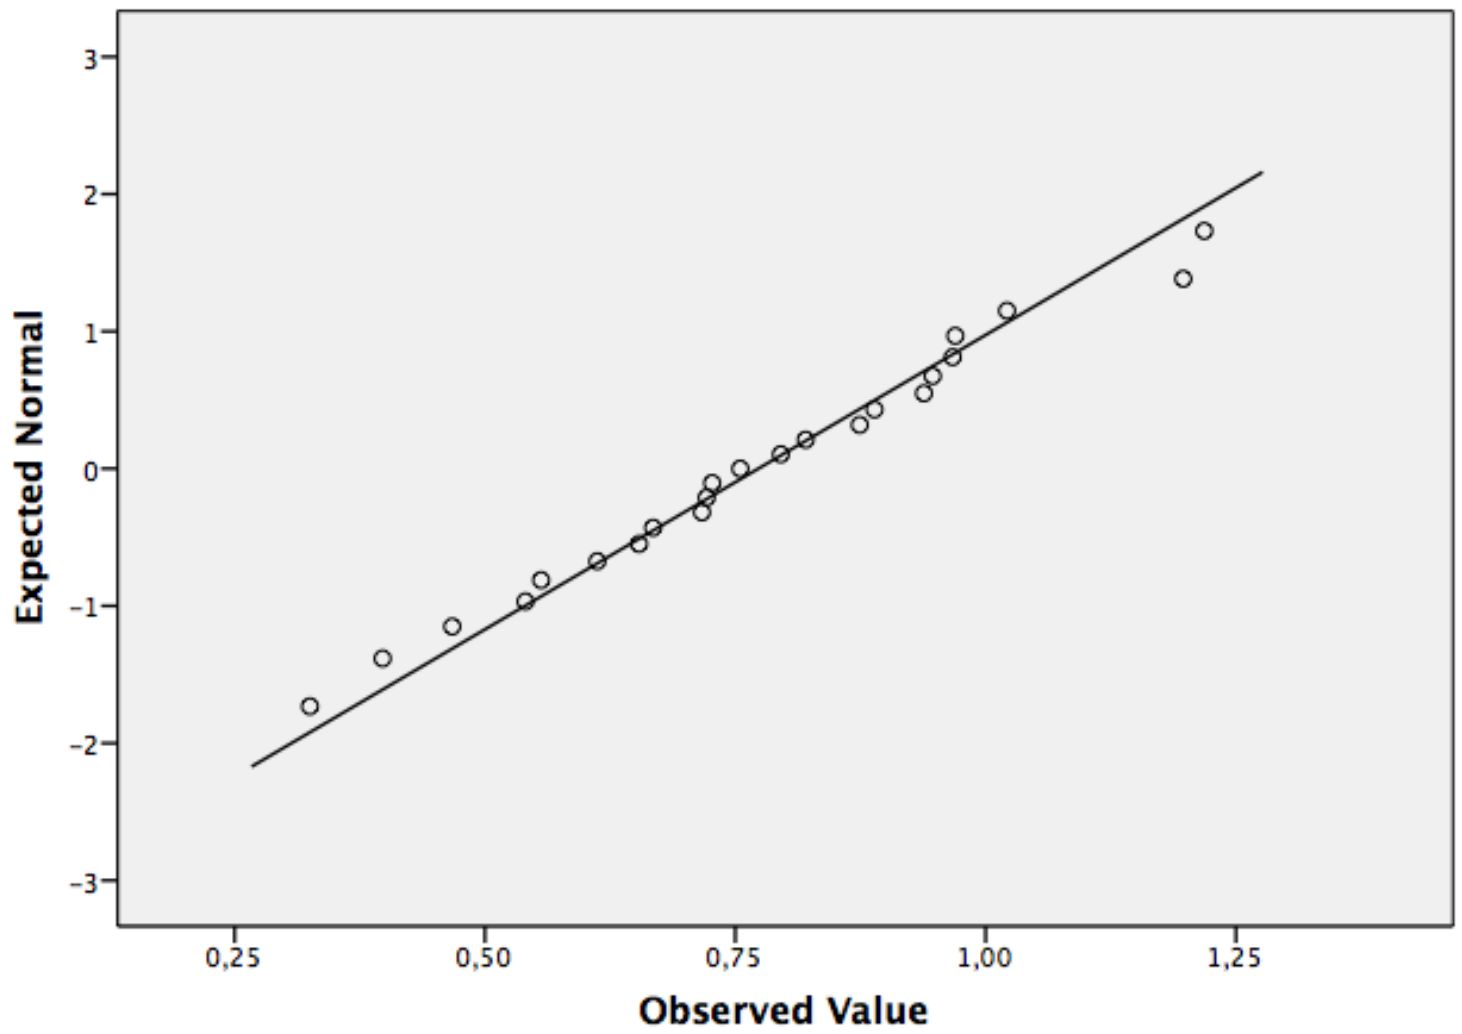

Normal Q-Q Plots

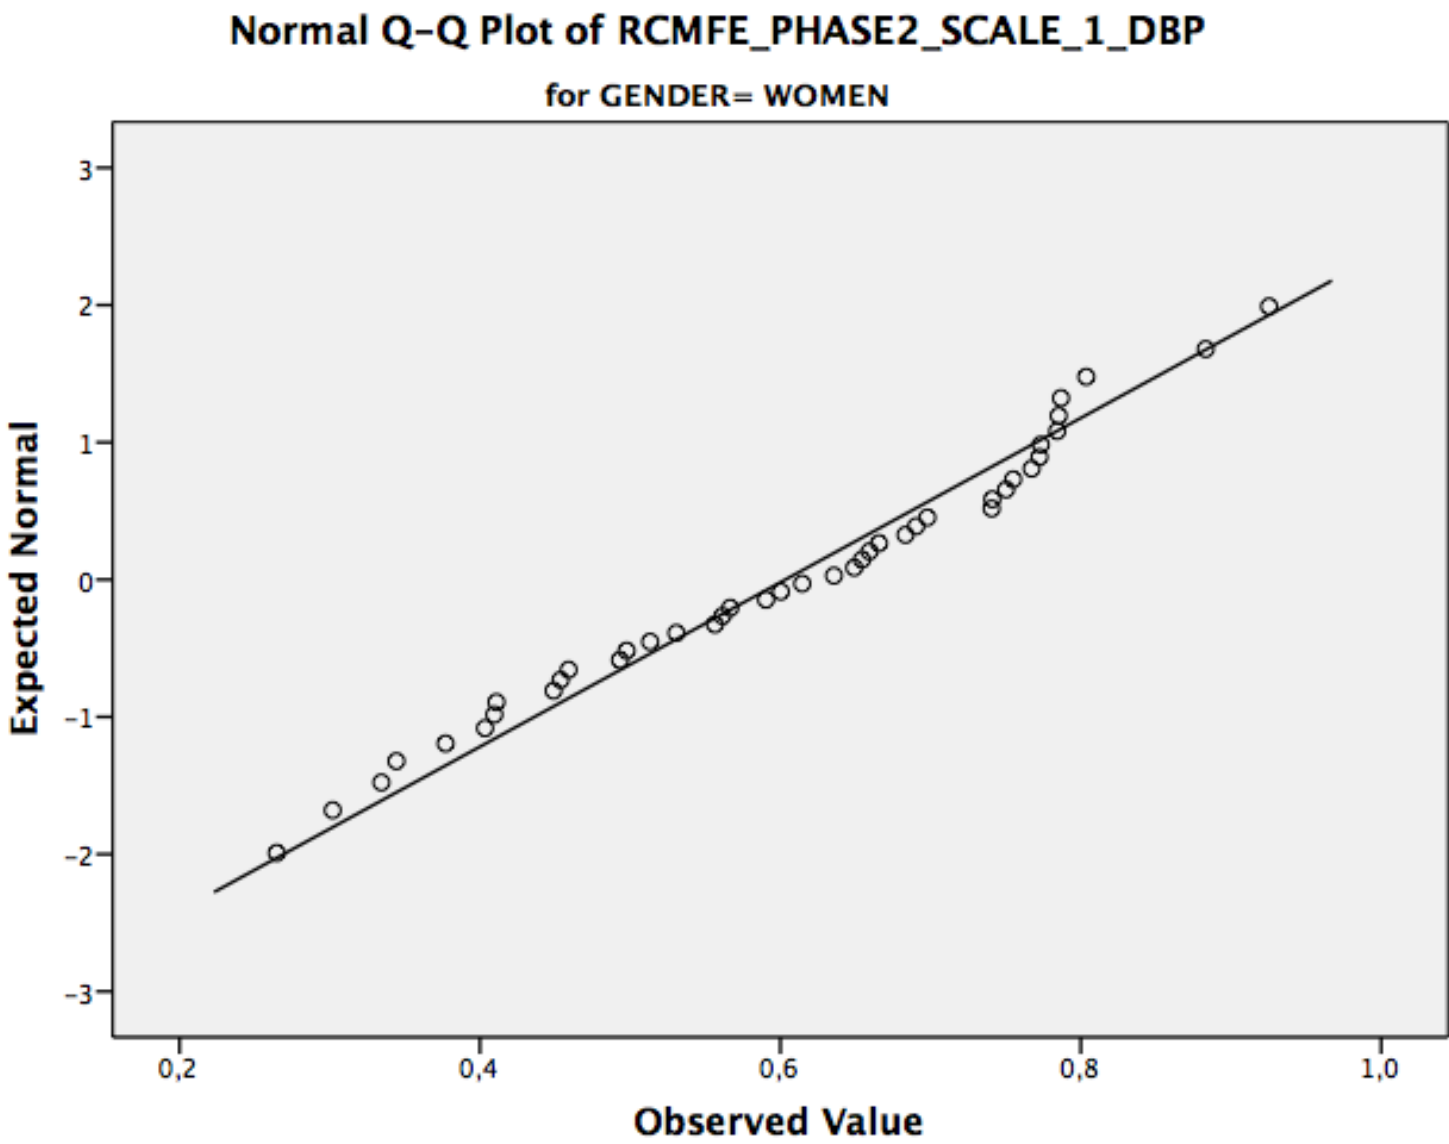

# Normal Q-Q Plot of RCMFE\_PHASE2\_SCALE\_1\_DBP

for GENDER= MEN

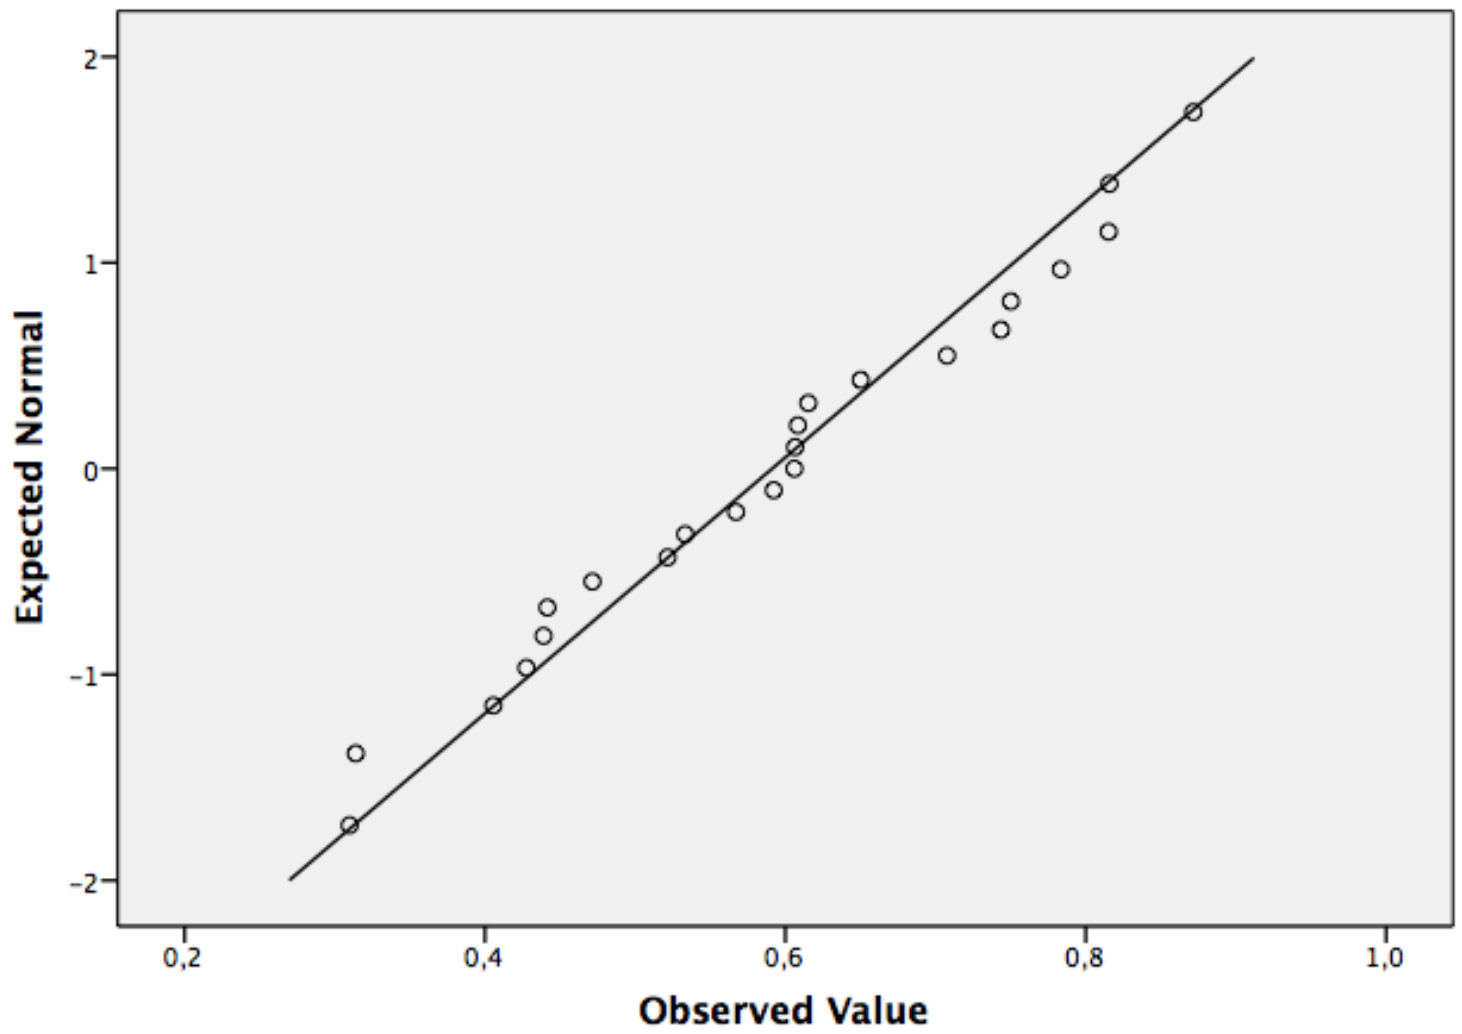

Normal Q-Q Plots

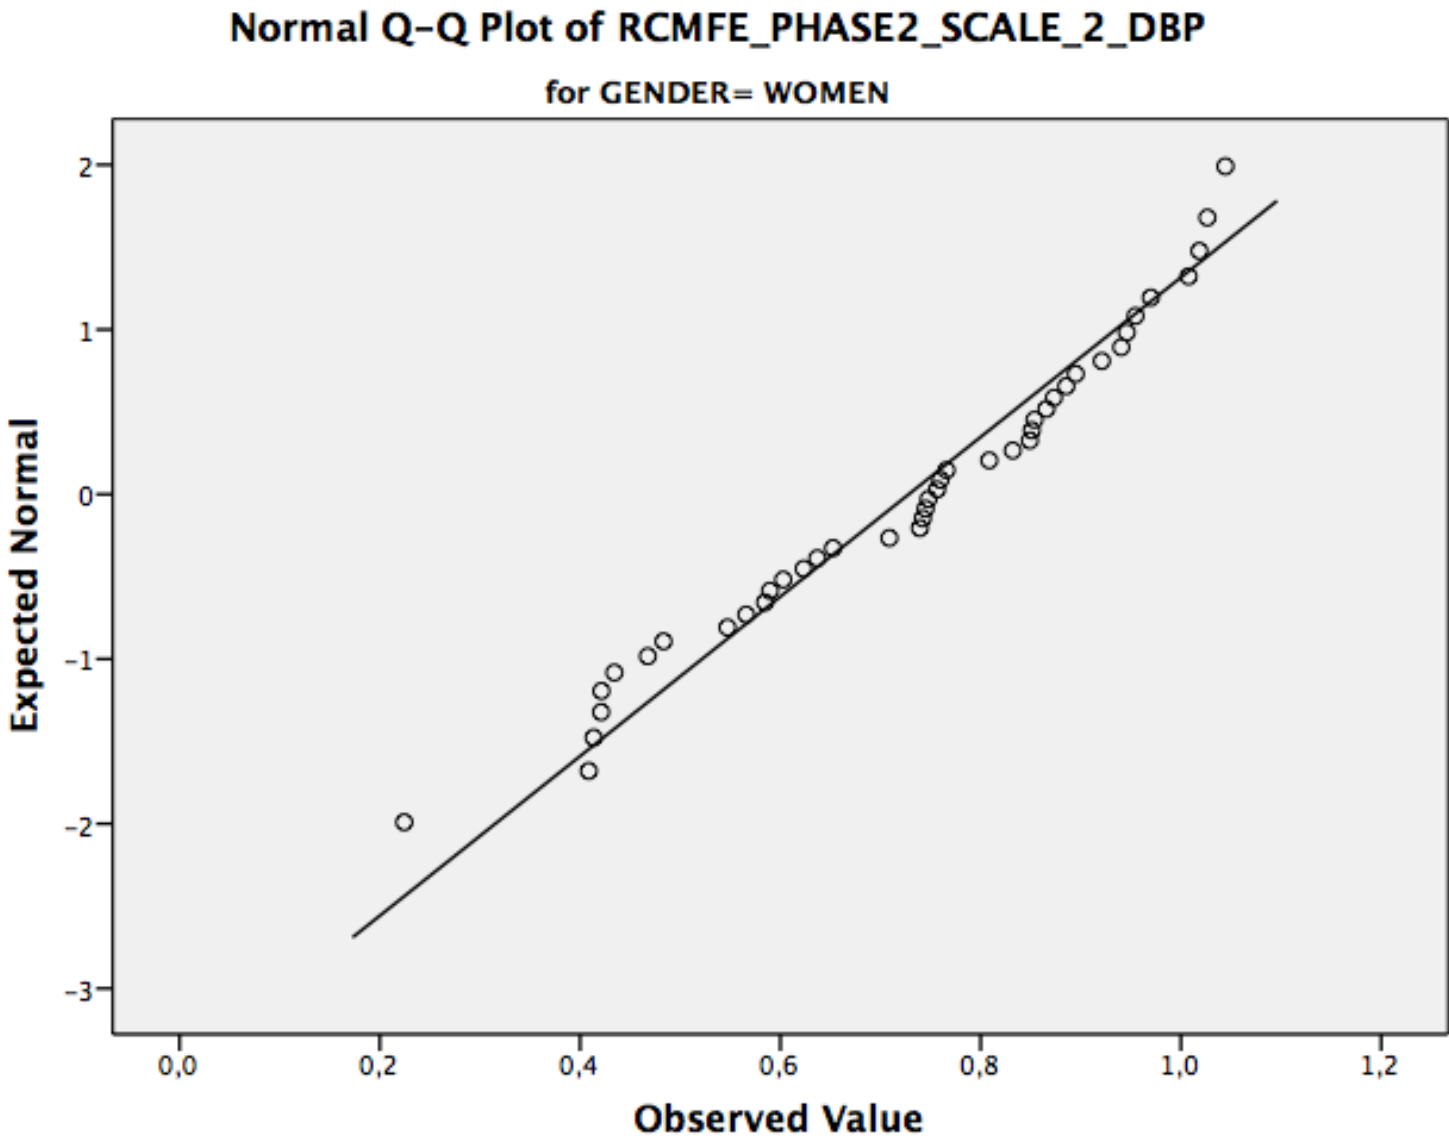

# Normal Q-Q Plot of RCMFE\_PHASE2\_SCALE\_2\_DBP

for GENDER= MEN

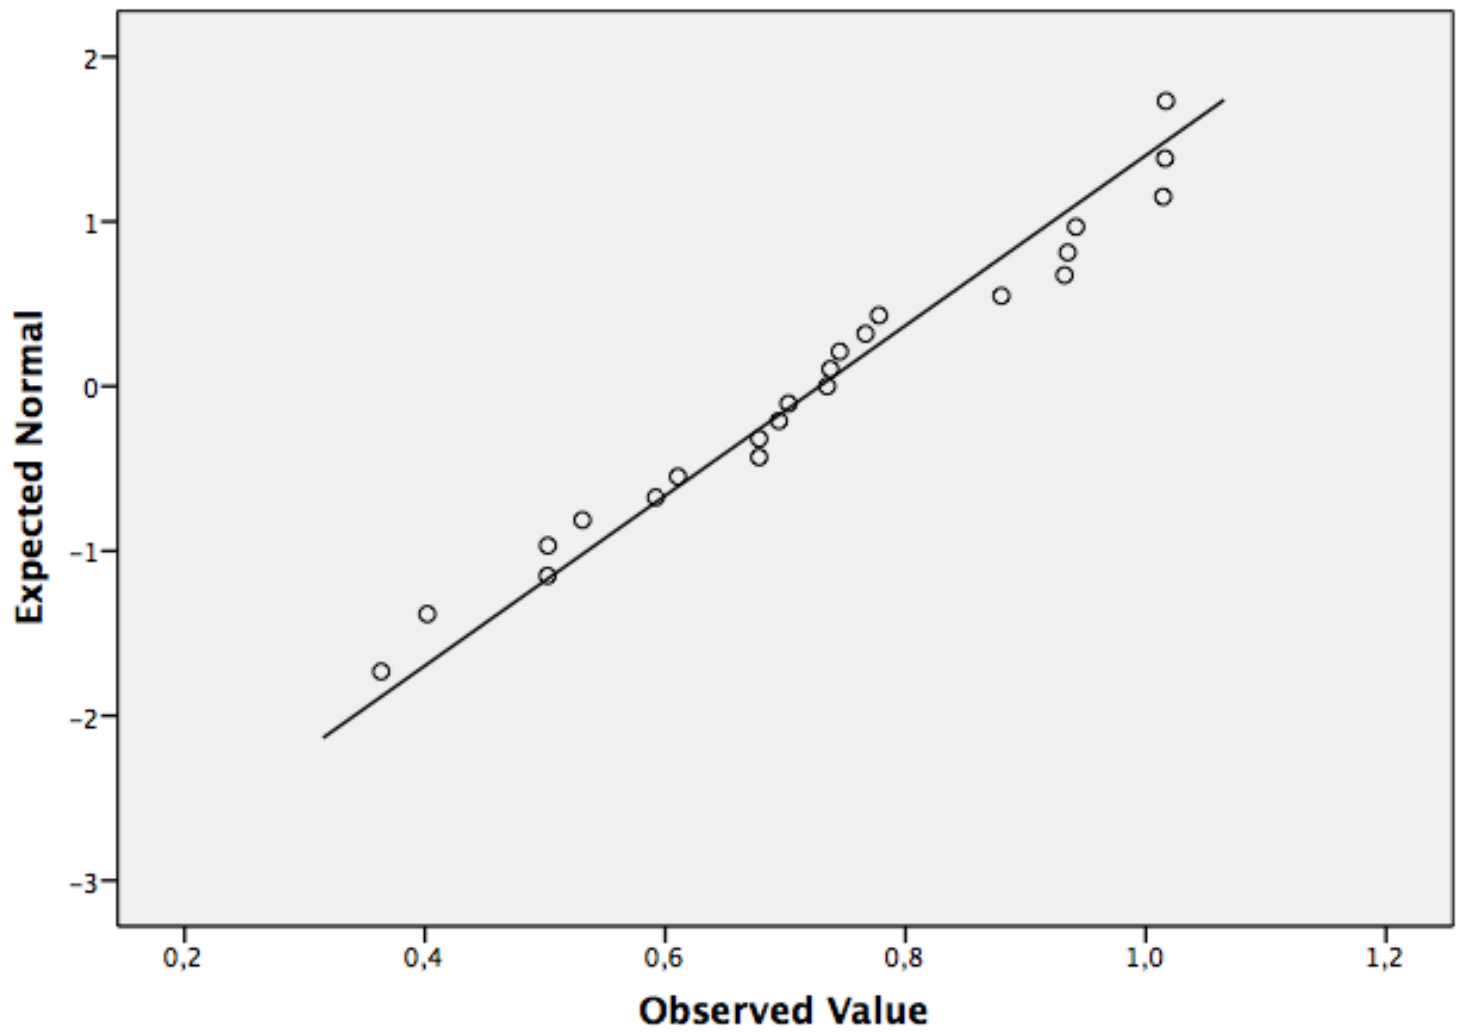

Normal Q-Q Plots

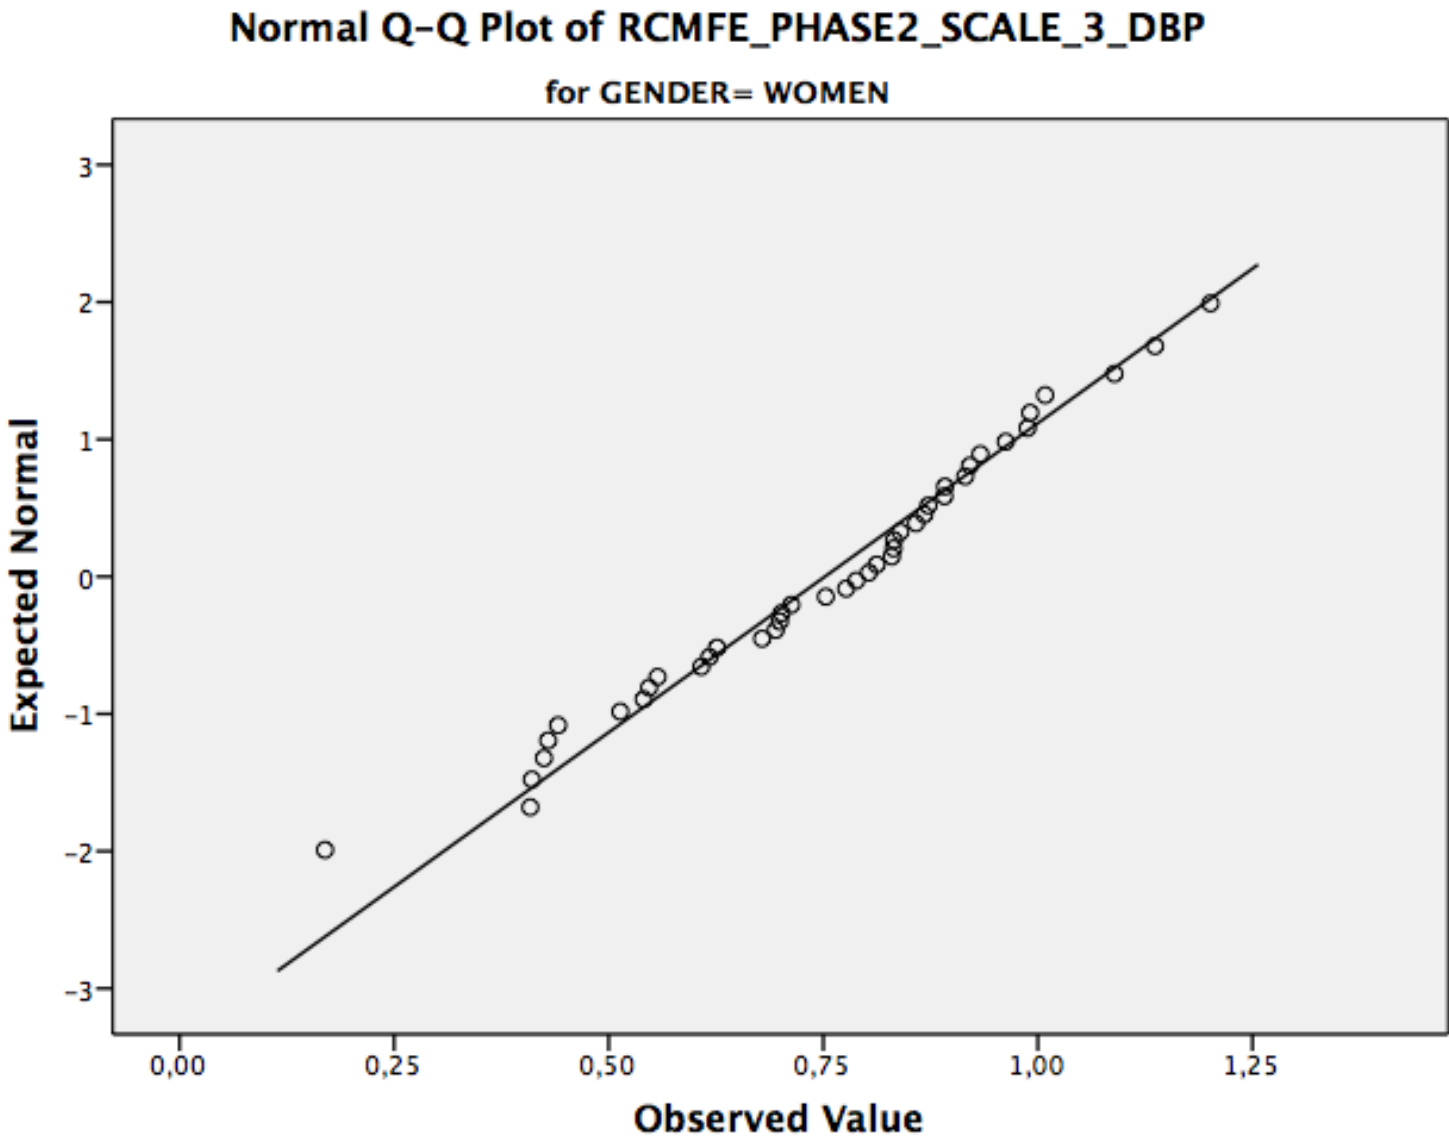



# Normal Q-Q Plot of RCMFE\_PHASE2\_SCALE\_3\_DBP

for GENDER= MEN

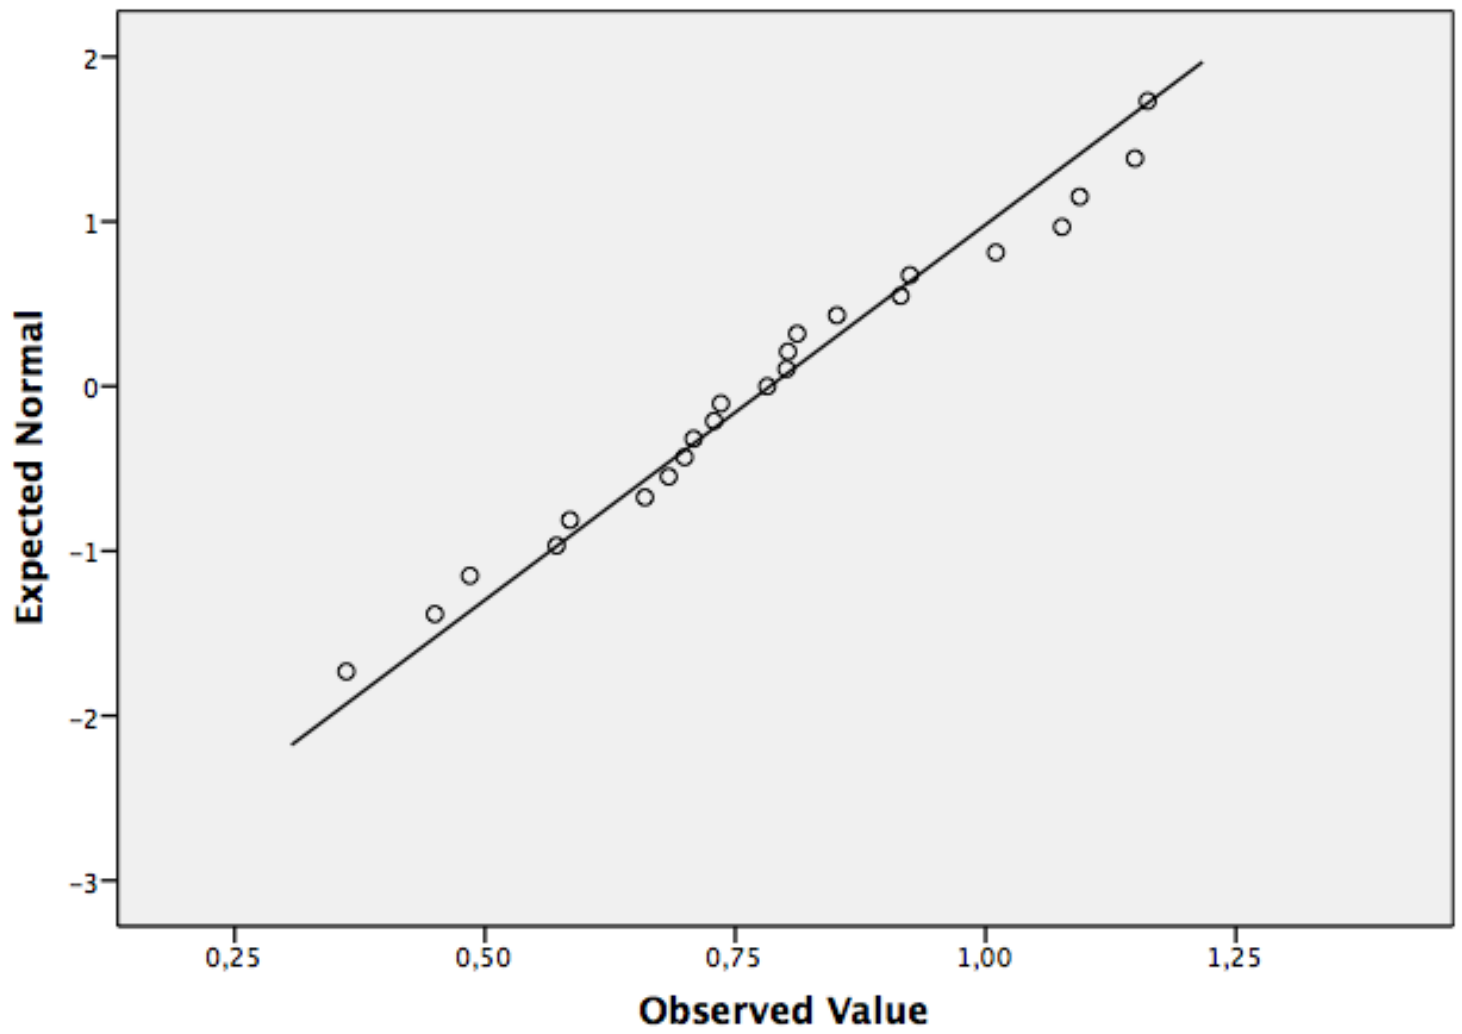

Normal Q-Q Plots

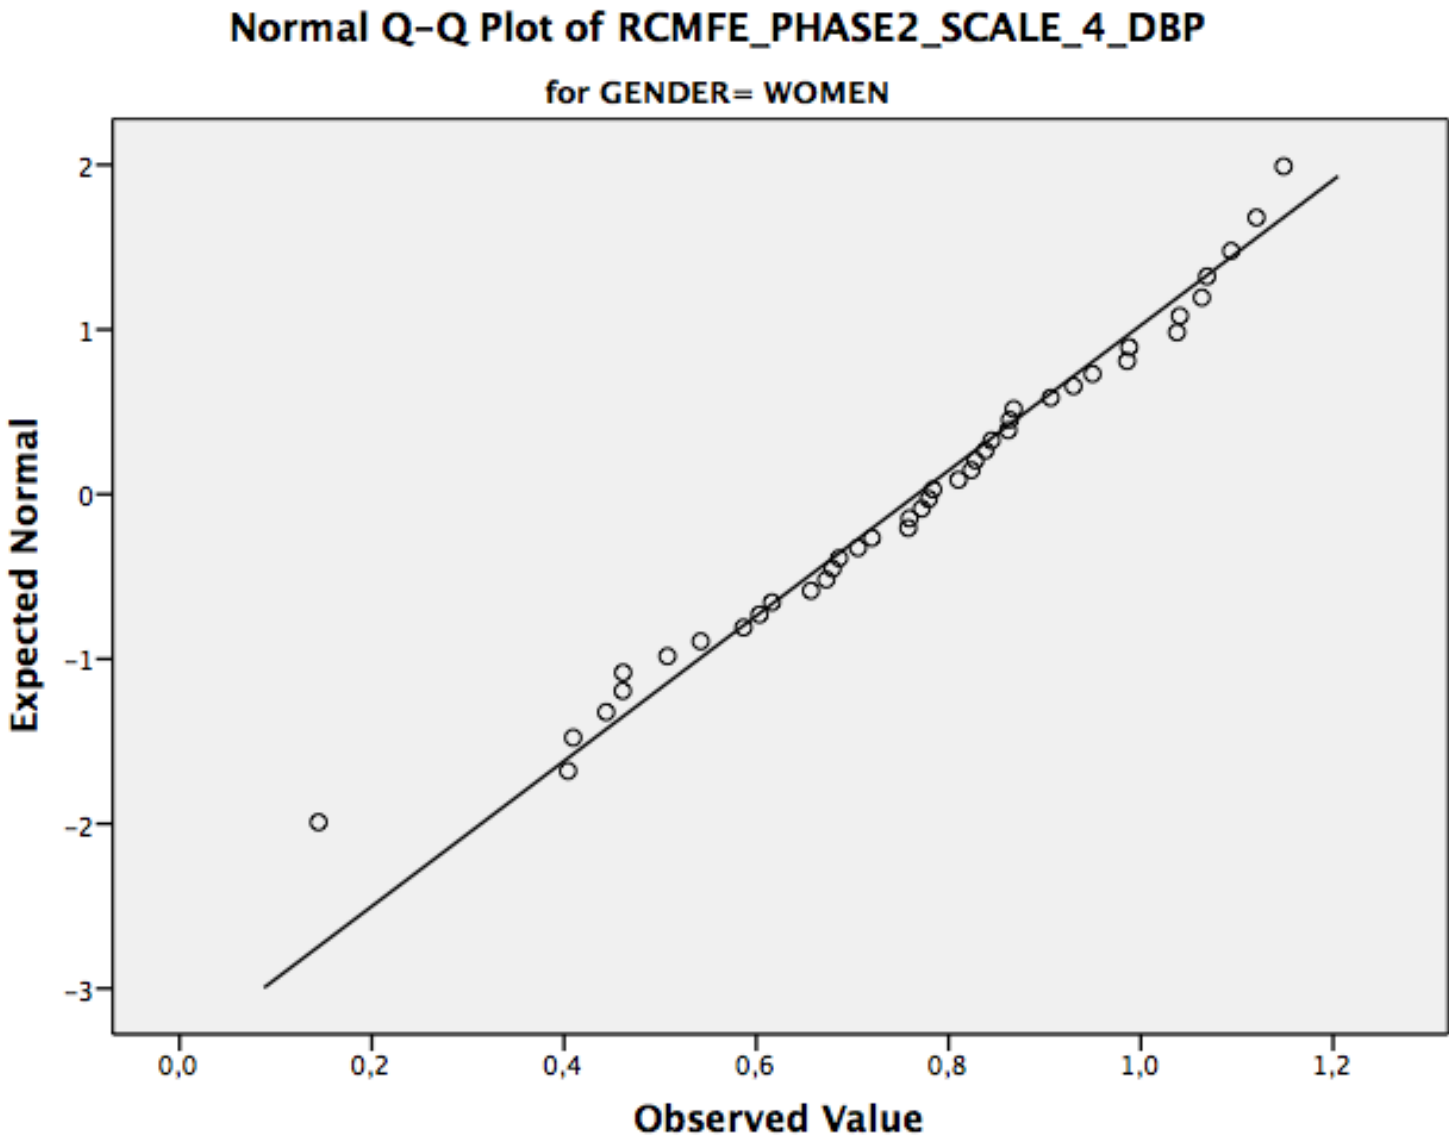

# Normal Q-Q Plot of RCMFE\_PHASE2\_SCALE\_4\_DBP

for GENDER= MEN

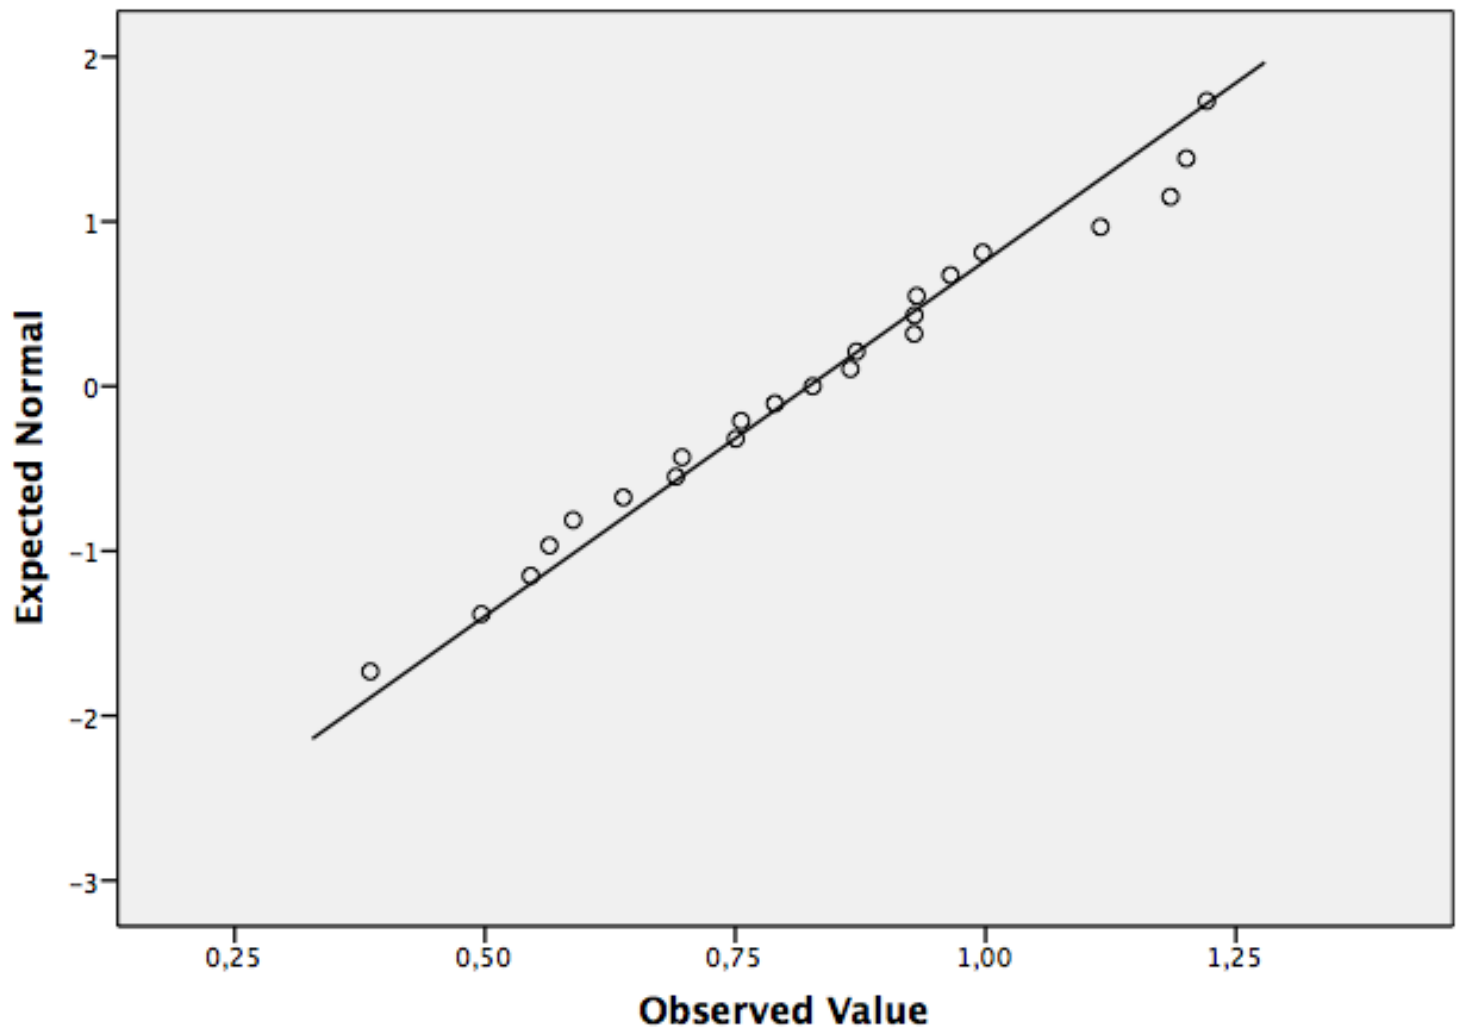

Normal Q-Q Plots

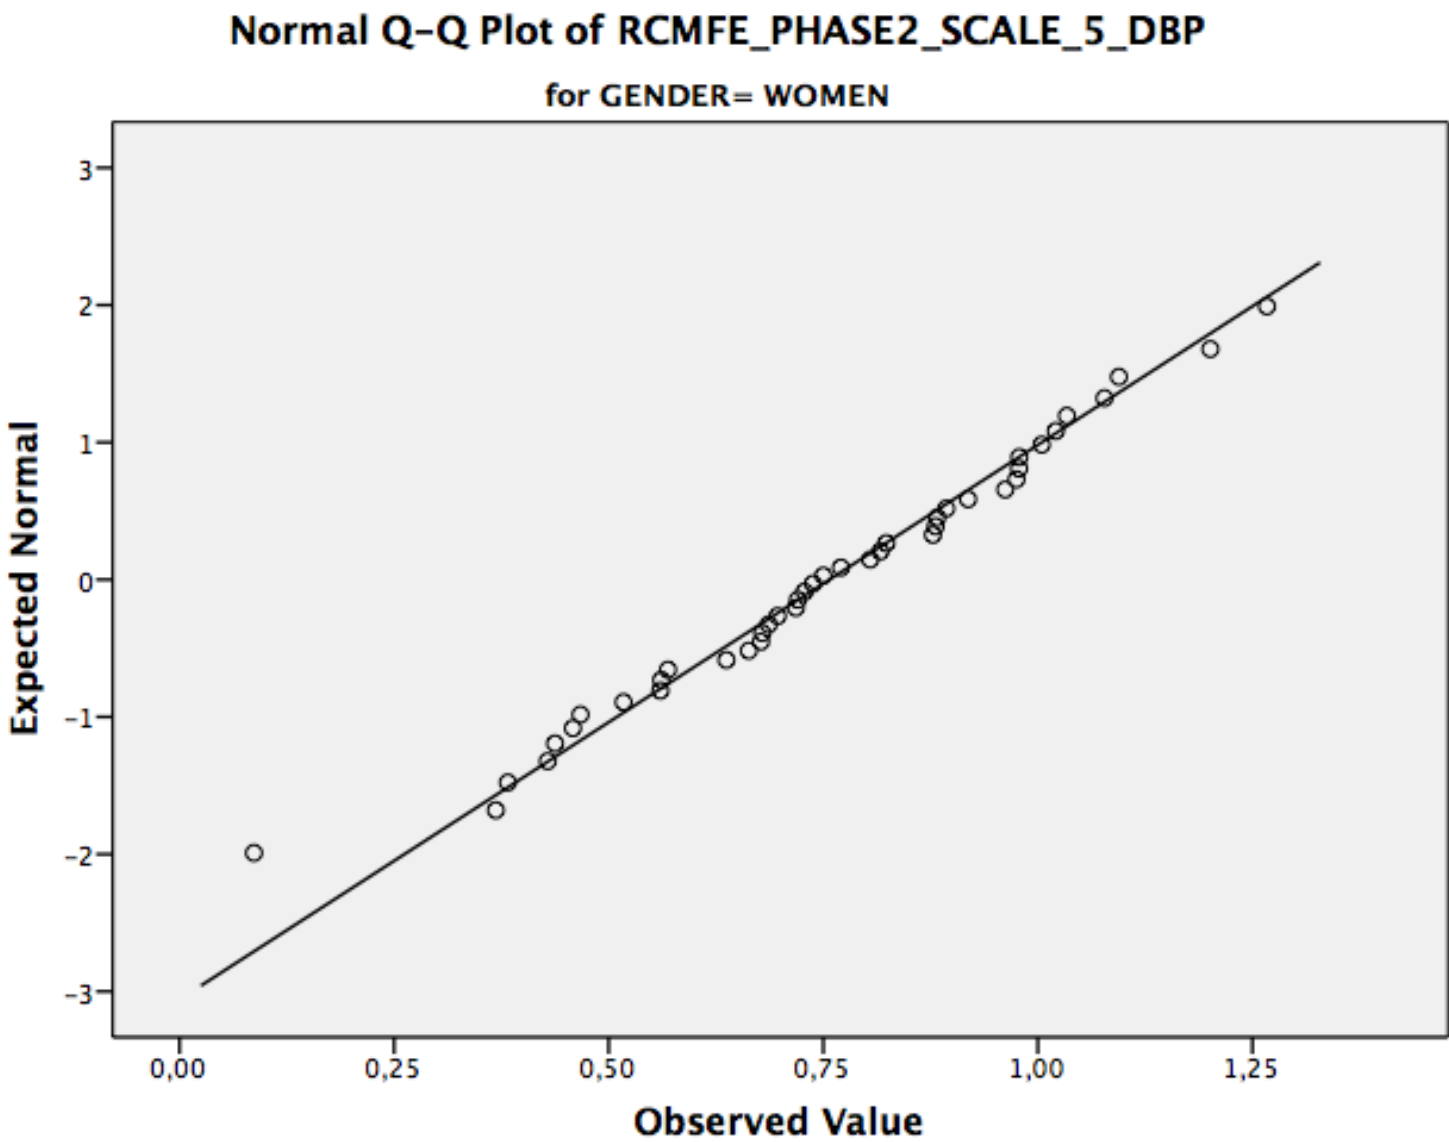

# Normal Q-Q Plot of RCMFE\_PHASE2\_SCALE\_5\_DBP

for GENDER= MEN

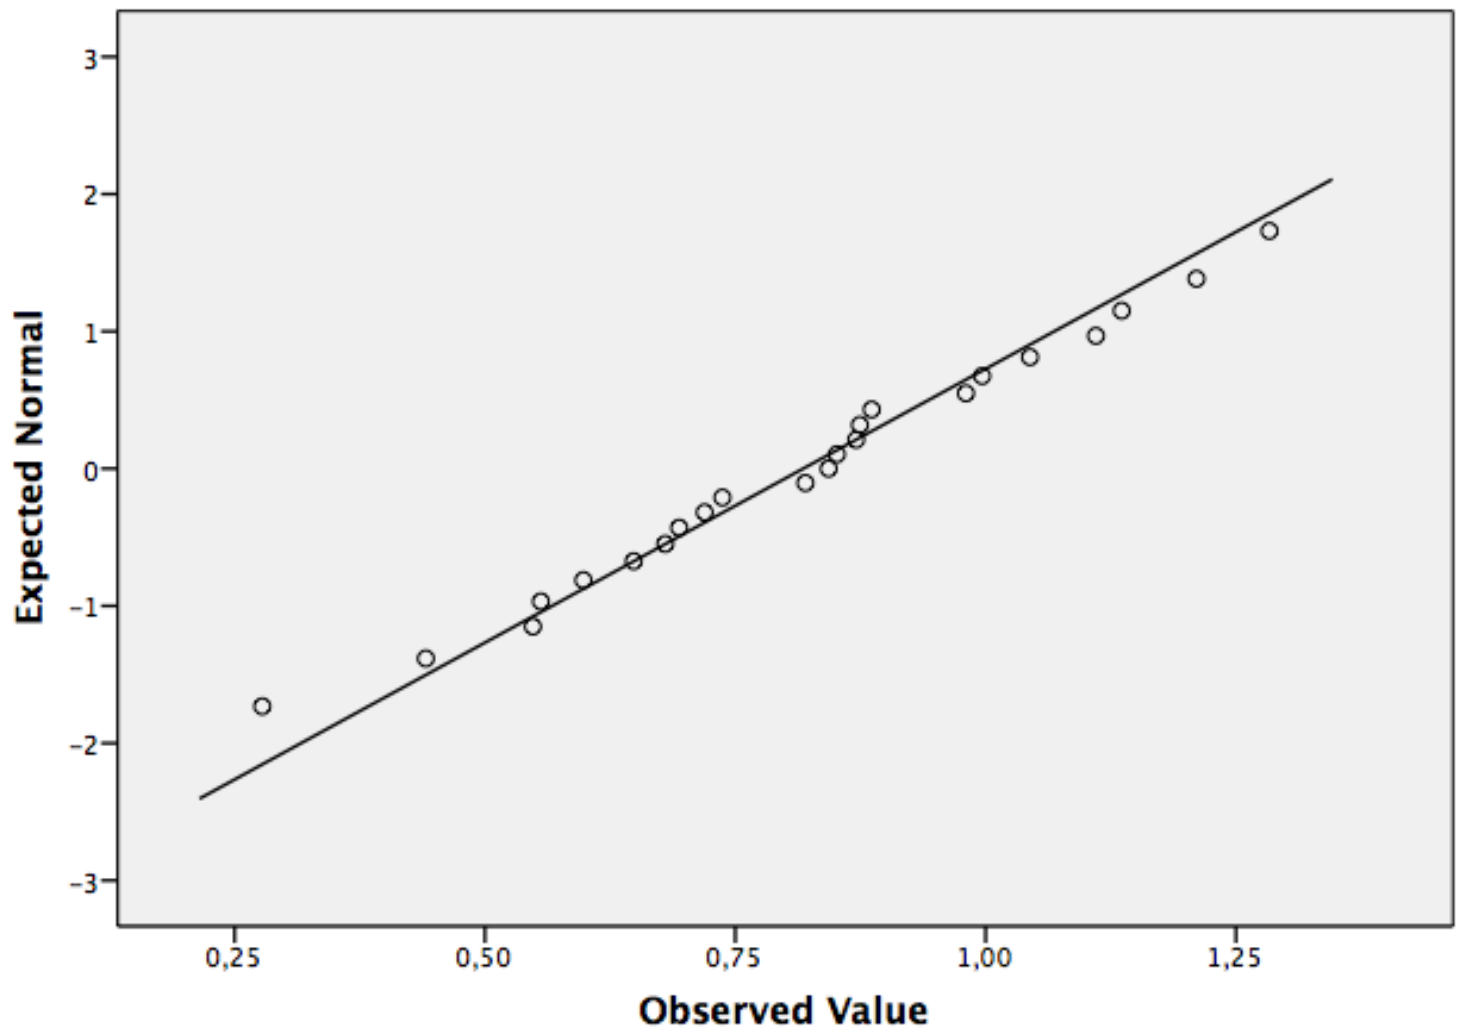

Normal Q-Q Plots

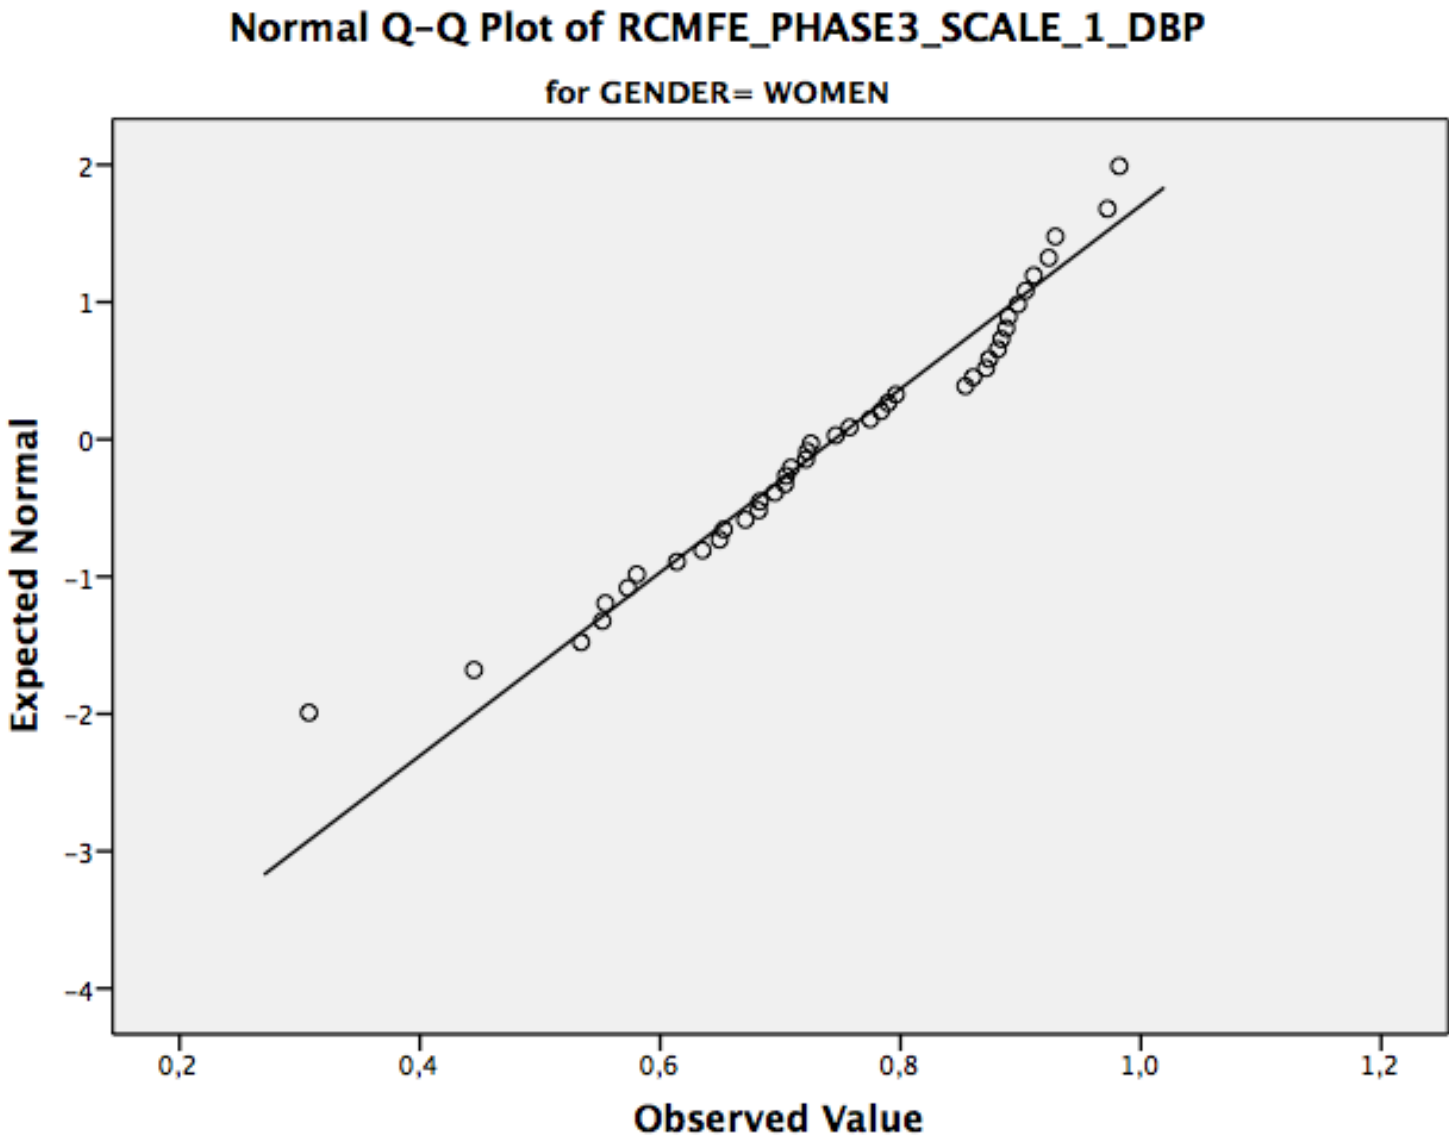

# Normal Q-Q Plot of RCMFE\_PHASE3\_SCALE\_1\_DBP

for GENDER= MEN

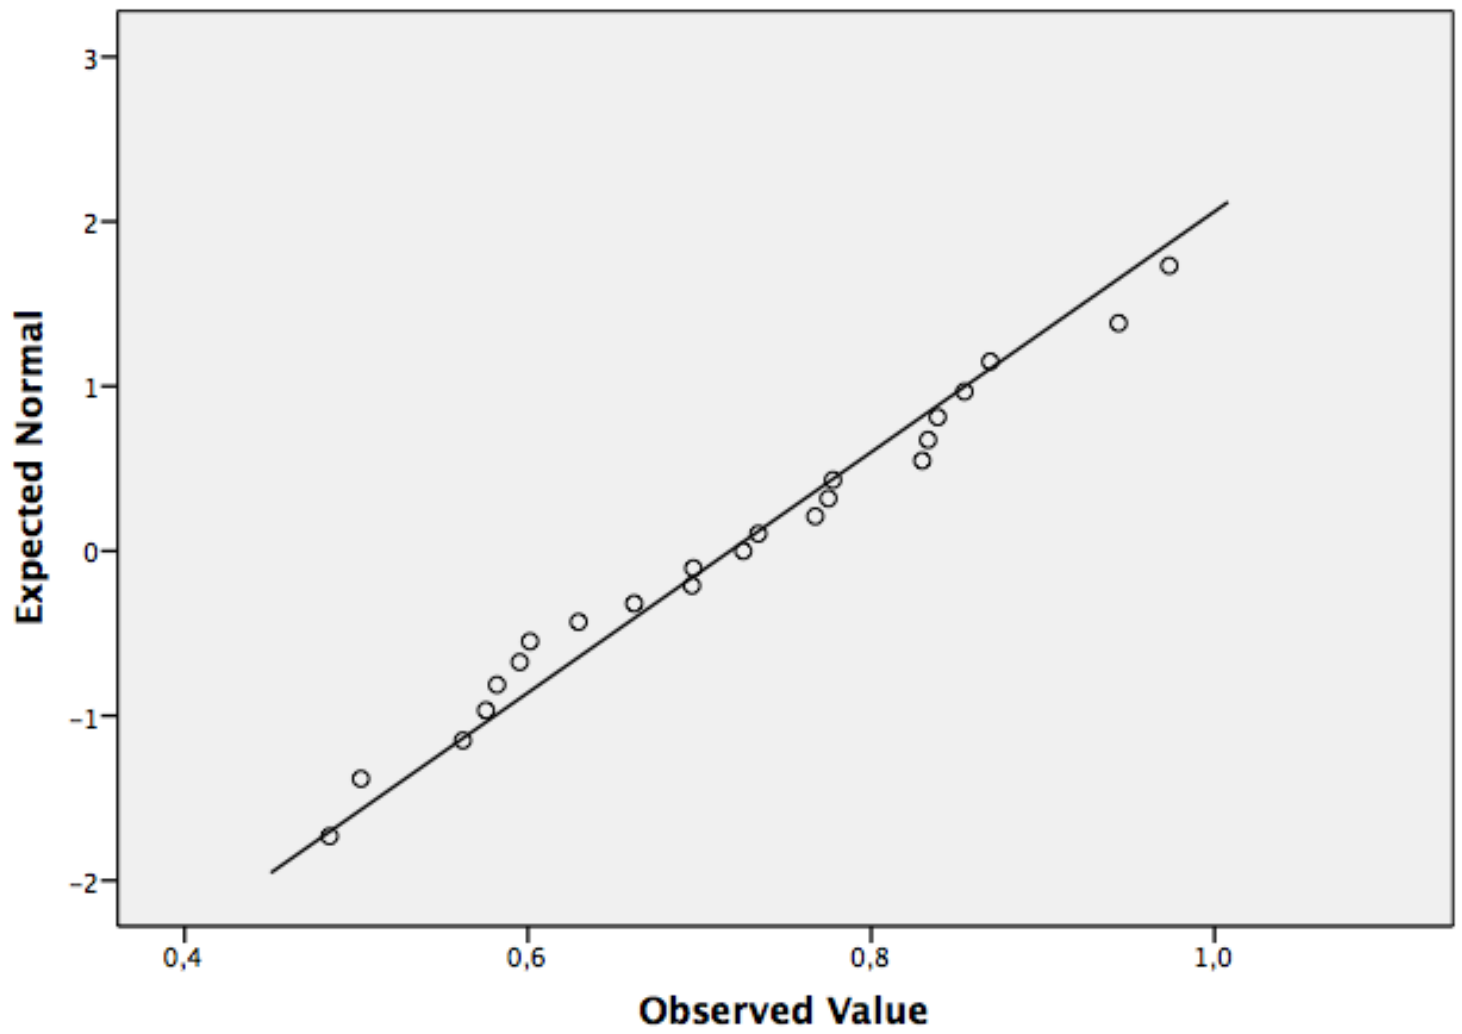

Normal Q-Q Plots

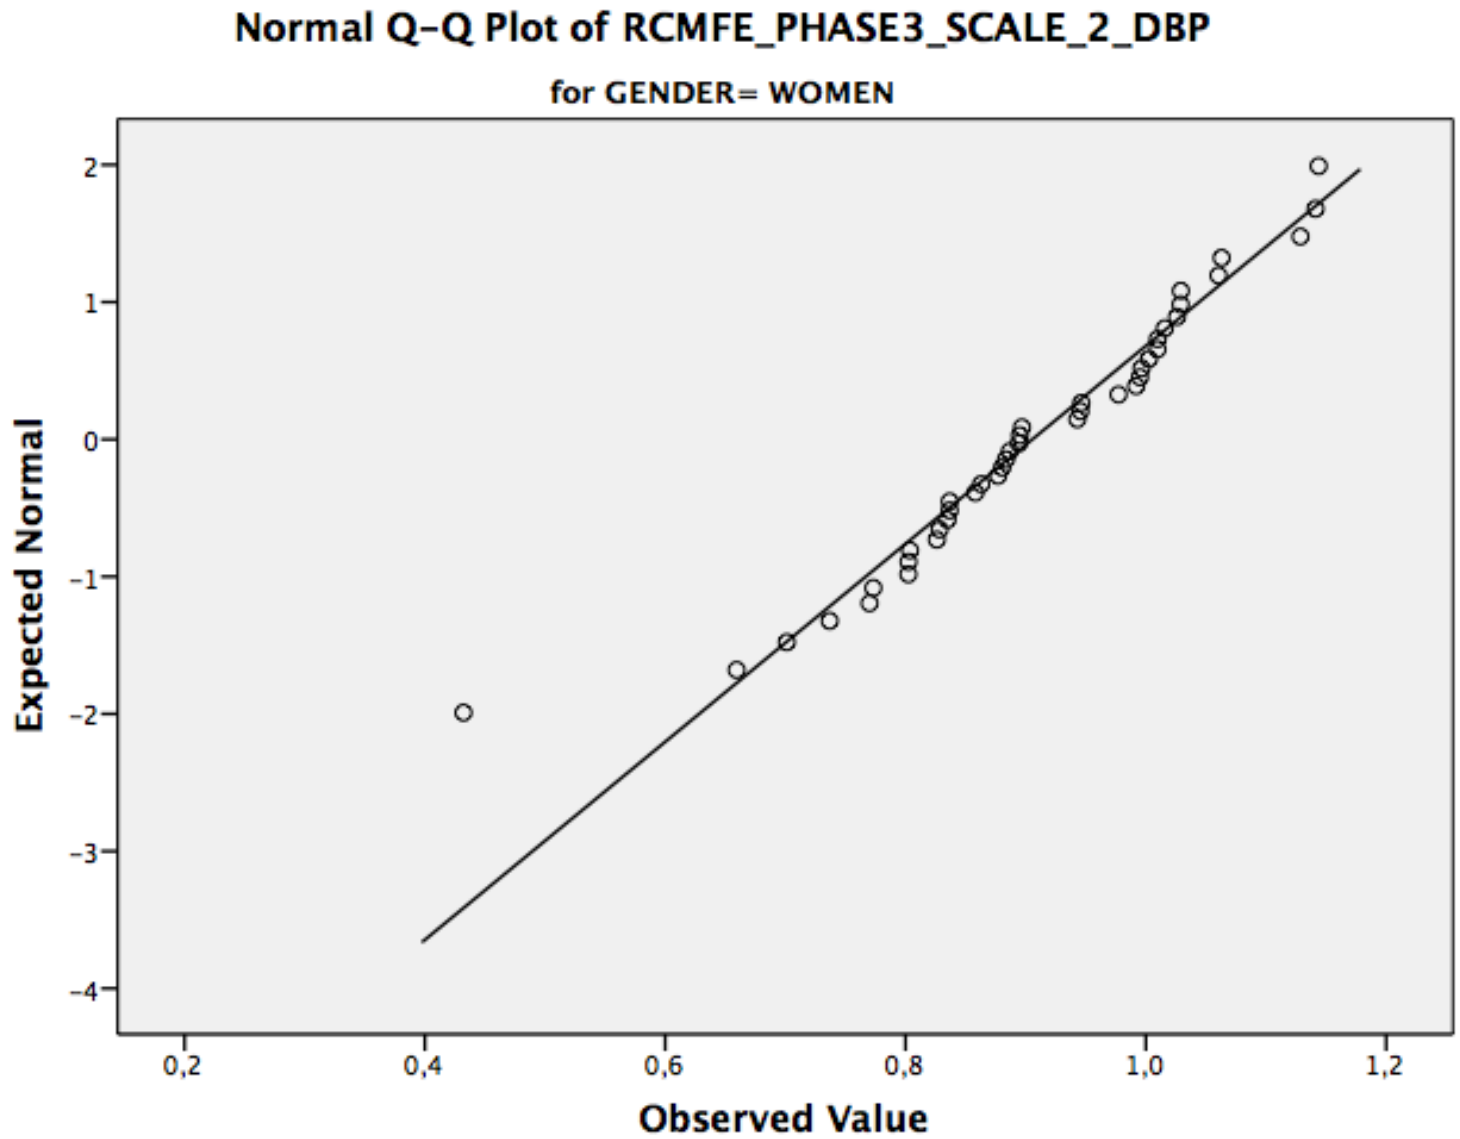



# Normal Q-Q Plot of RCMFE\_PHASE3\_SCALE\_2\_DBP

for GENDER= MEN

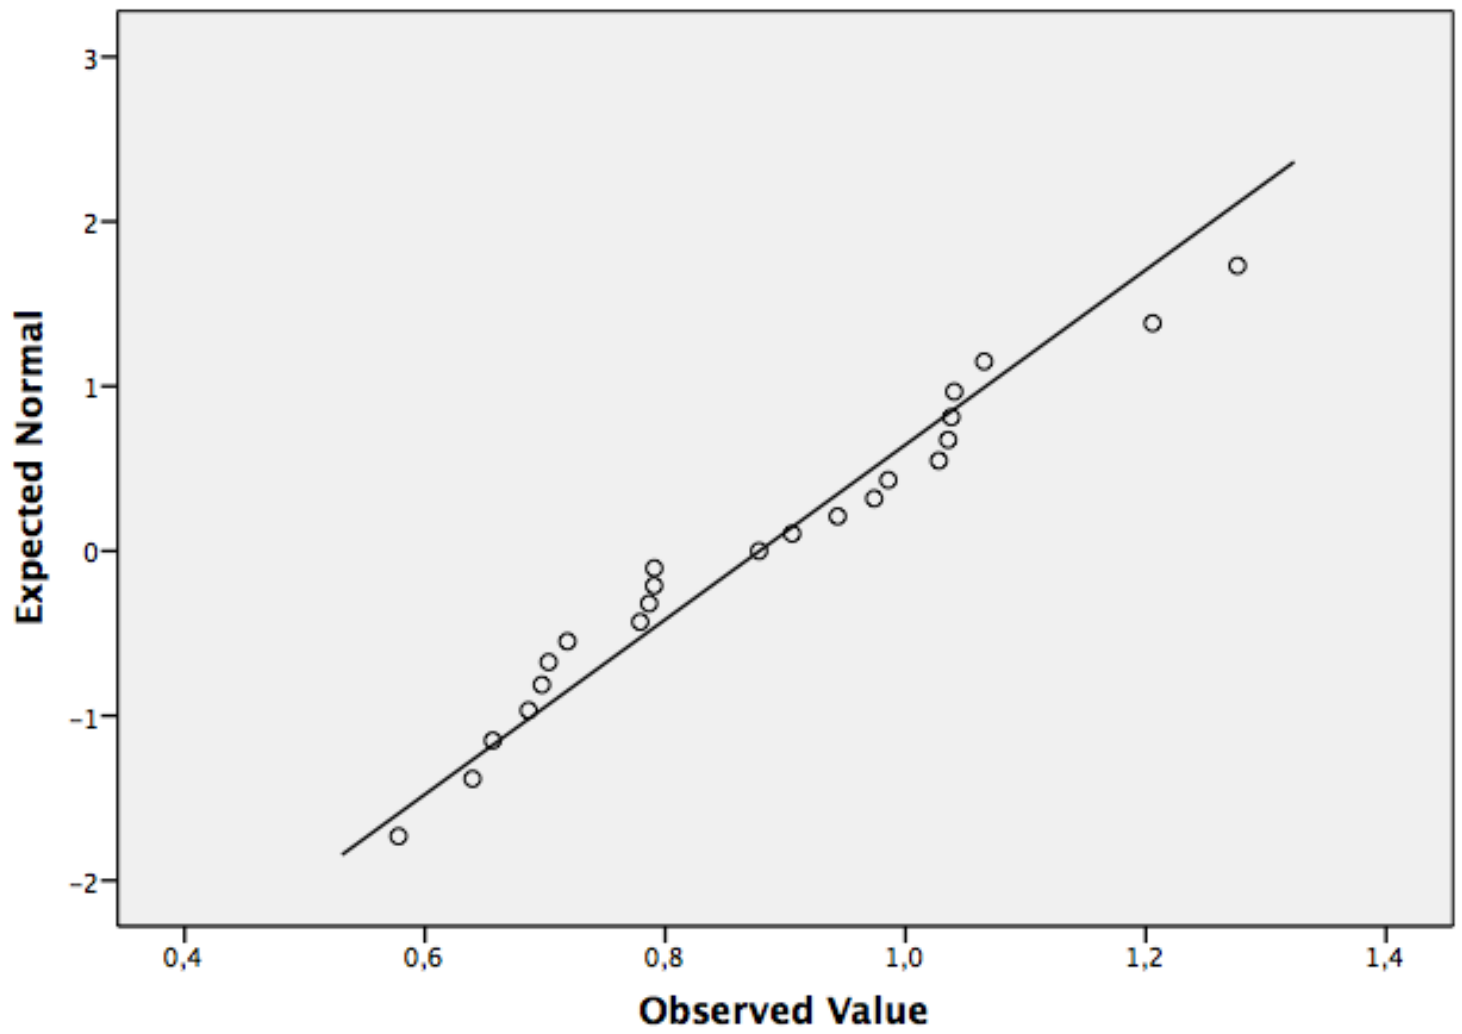

Normal Q-Q Plots

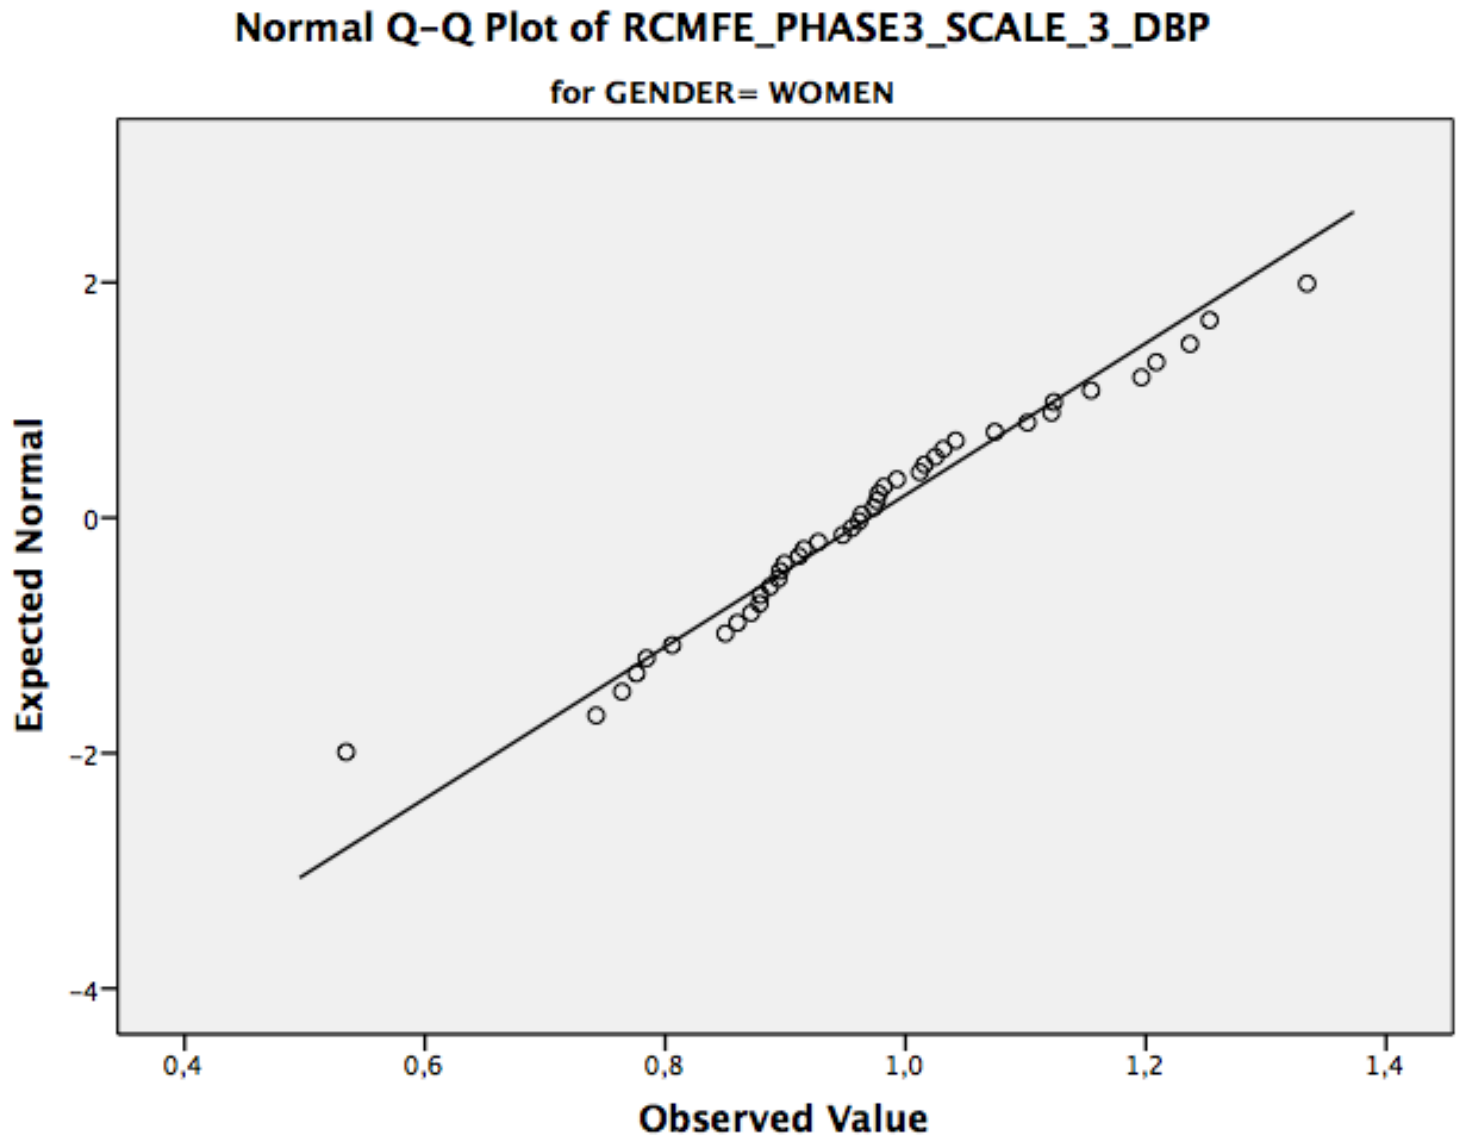

# Normal Q-Q Plot of RCMFE\_PHASE3\_SCALE\_3\_DBP

for GENDER= MEN

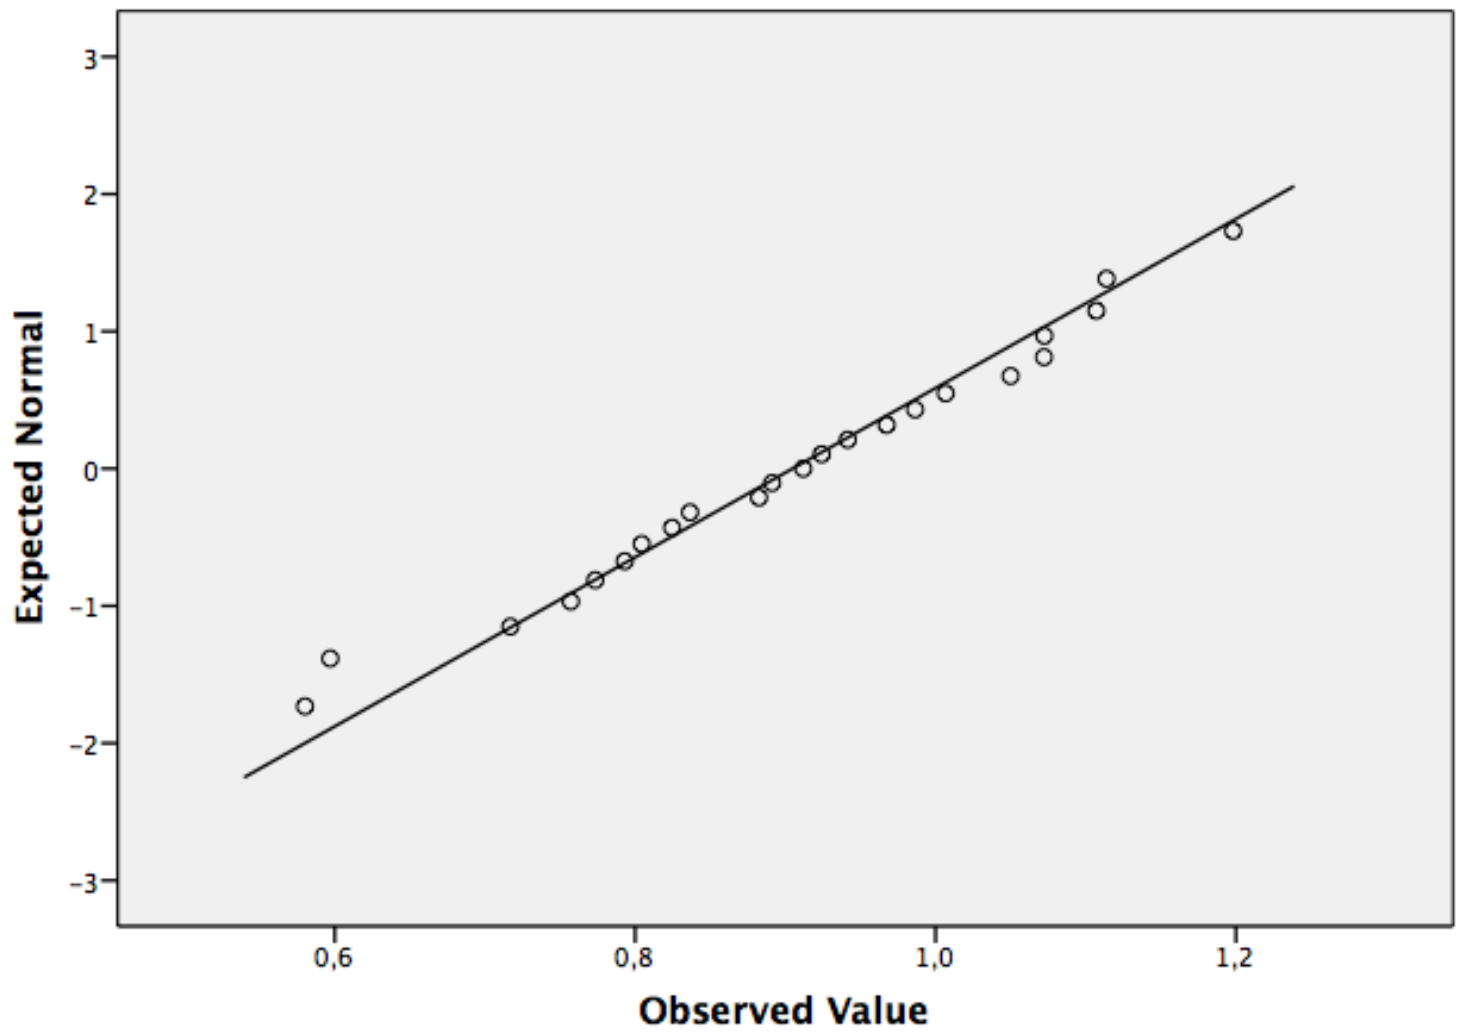

## Normal Q-Q Plots

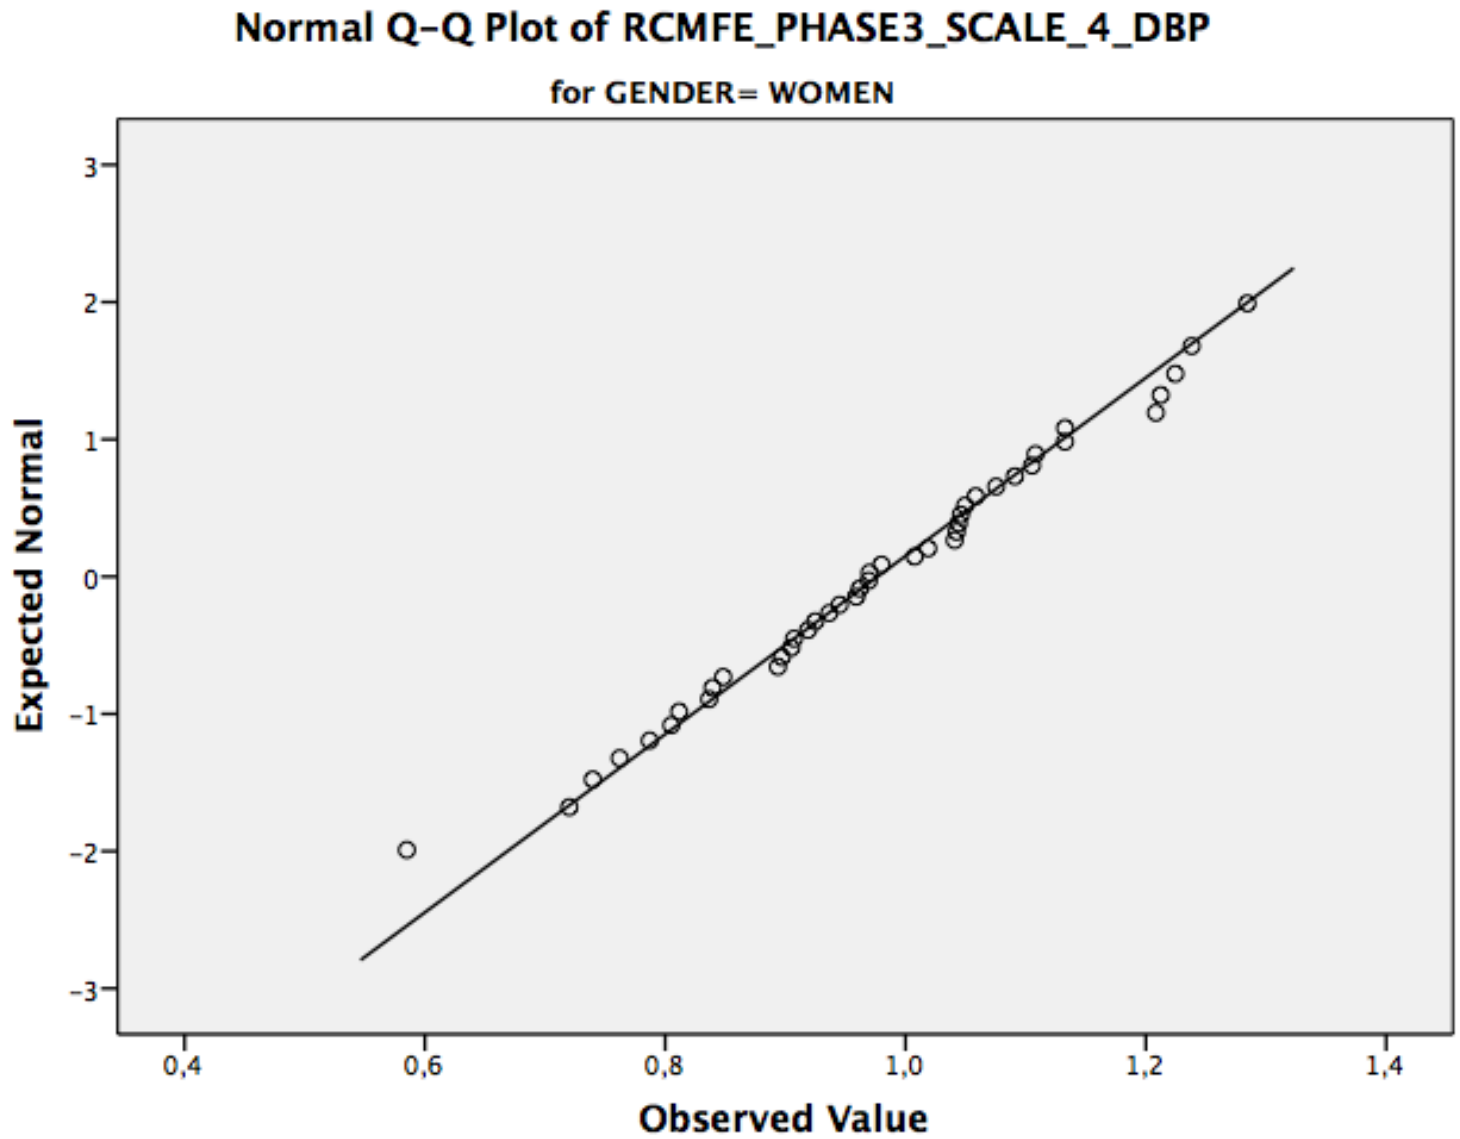

# Normal Q-Q Plot of RCMFE\_PHASE3\_SCALE\_4\_DBP

for GENDER= MEN

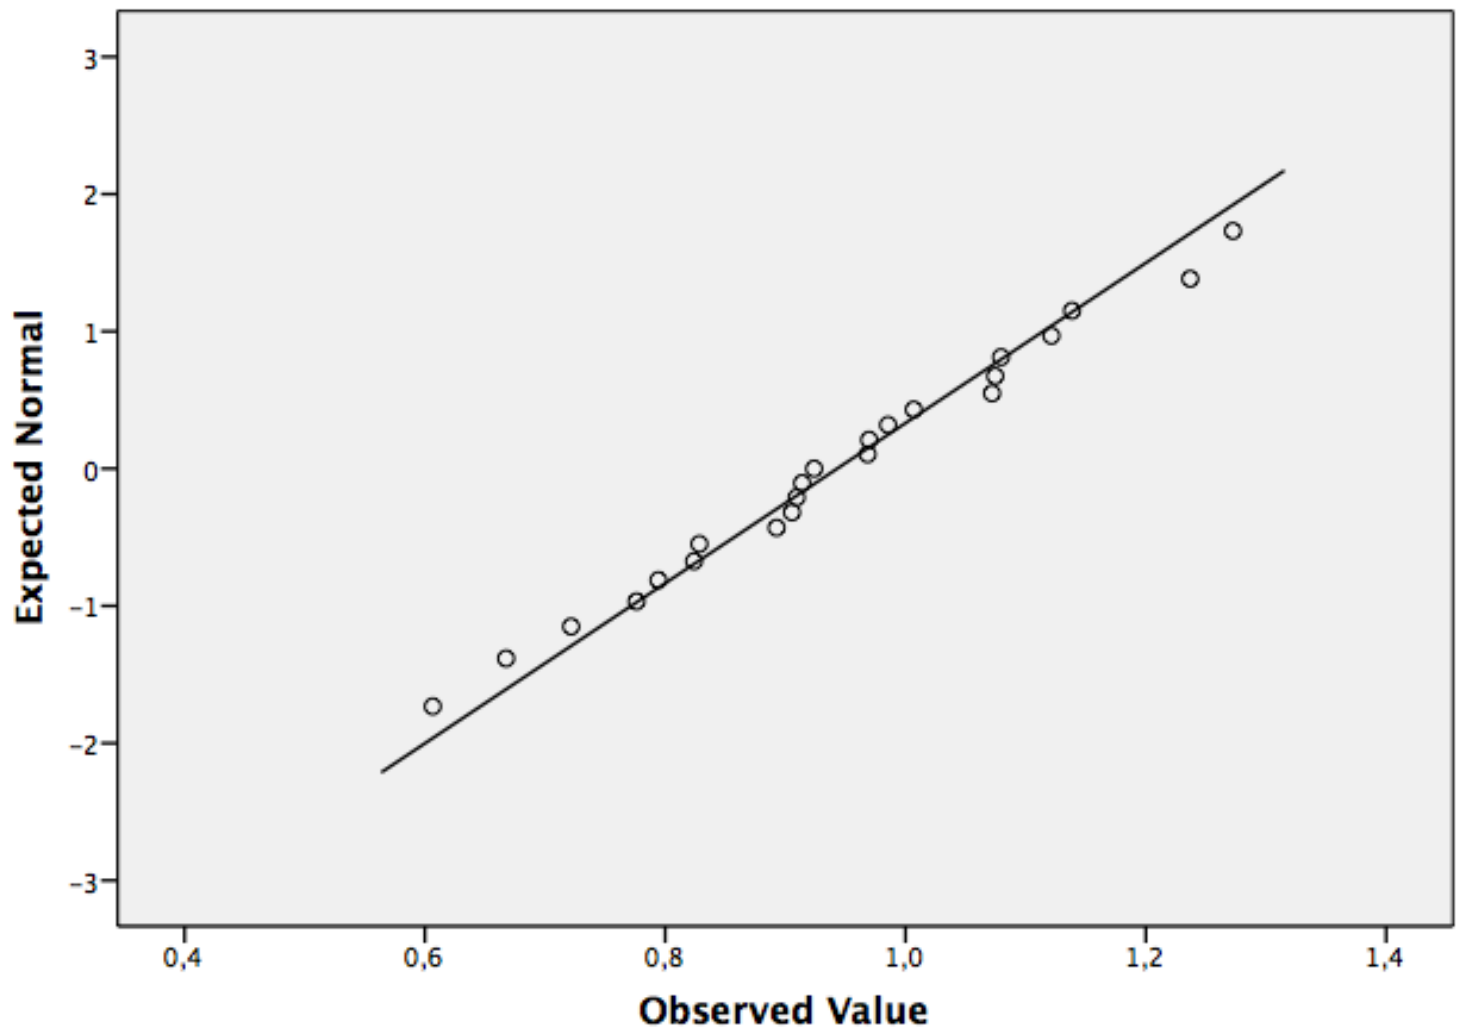

## Normal Q-Q Plots

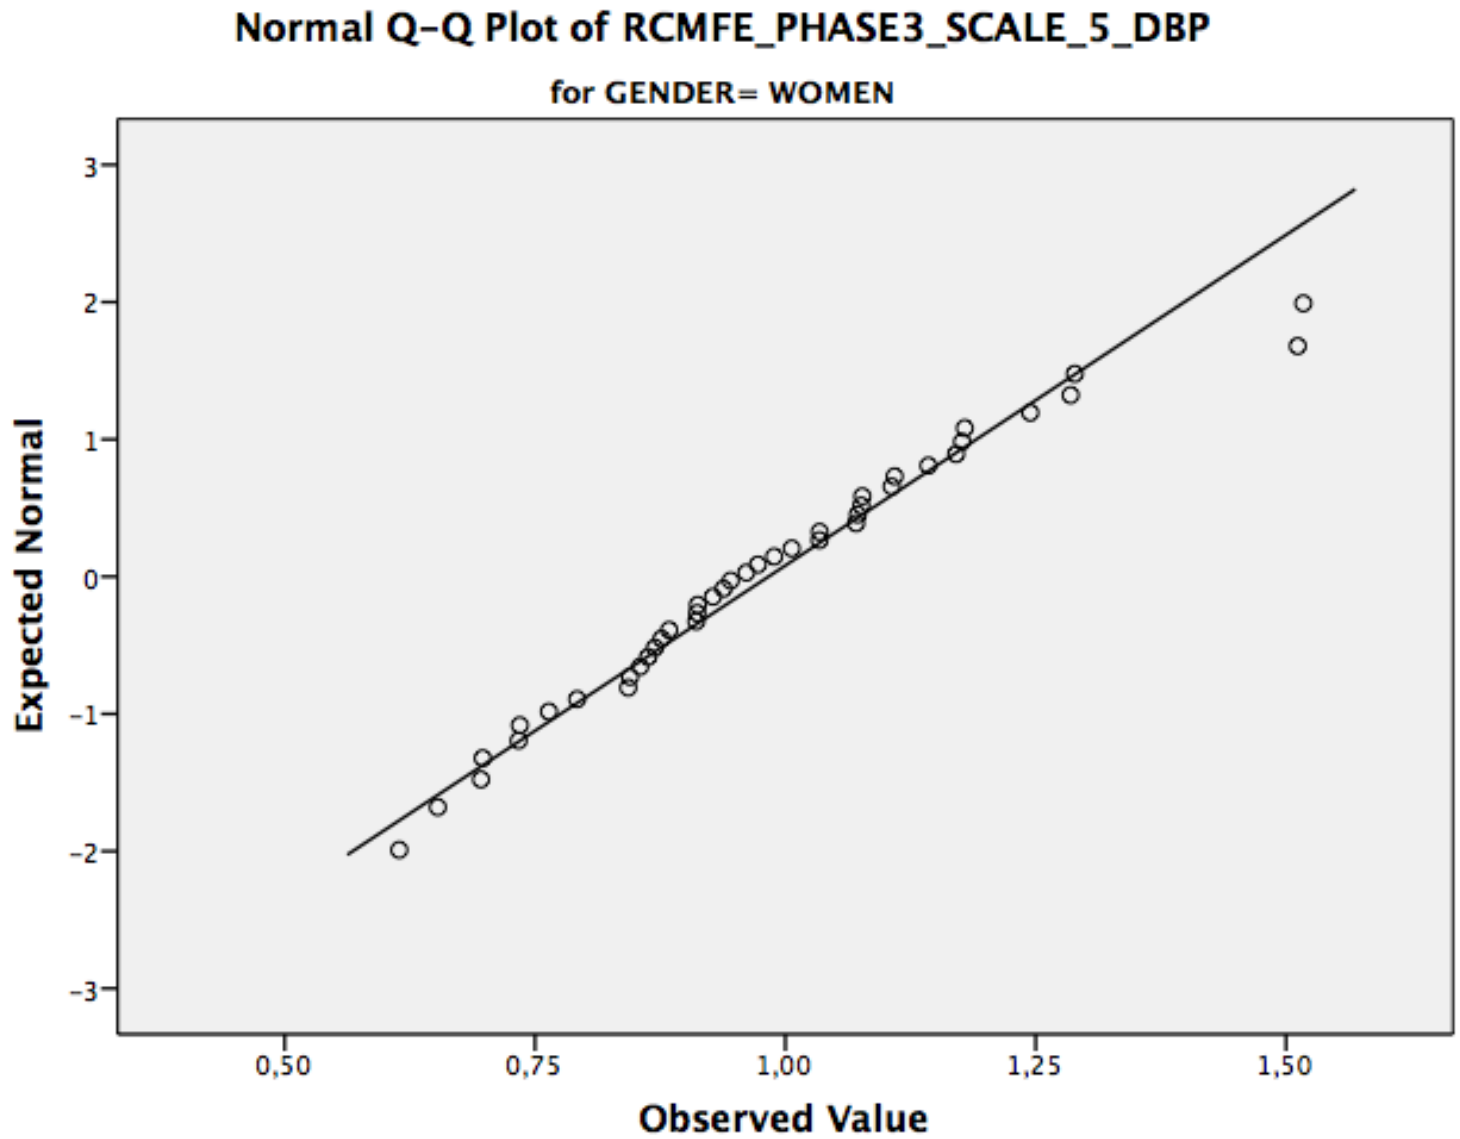

# Normal Q-Q Plot of RCMFE\_PHASE3\_SCALE\_5\_DBP

for GENDER= MEN

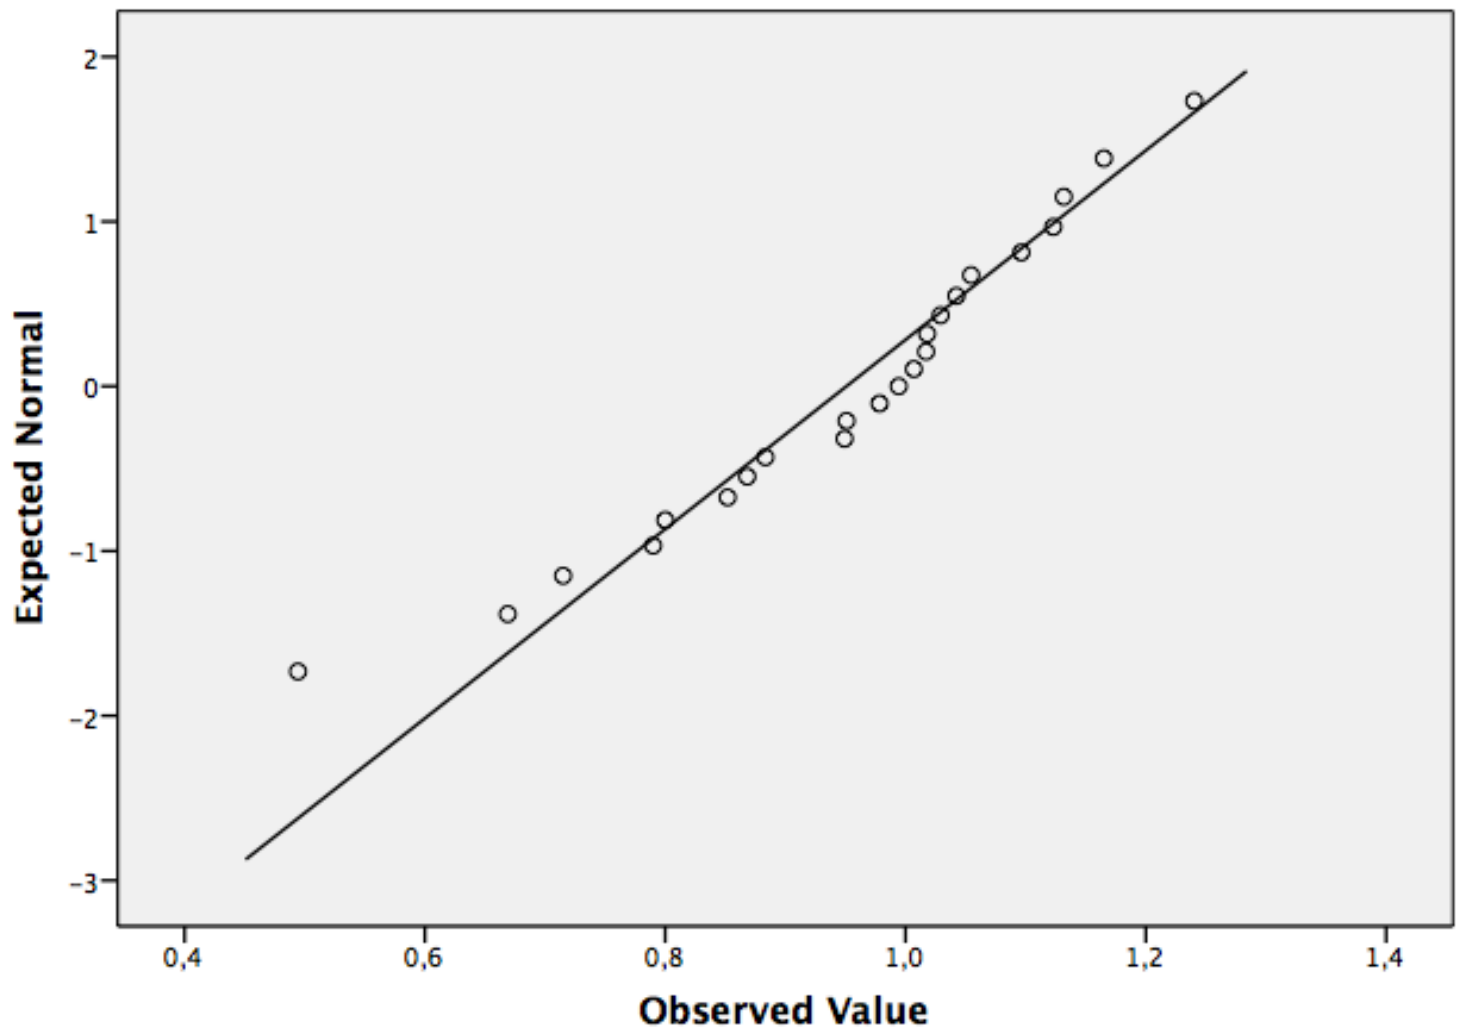

Normal Q-Q Plots

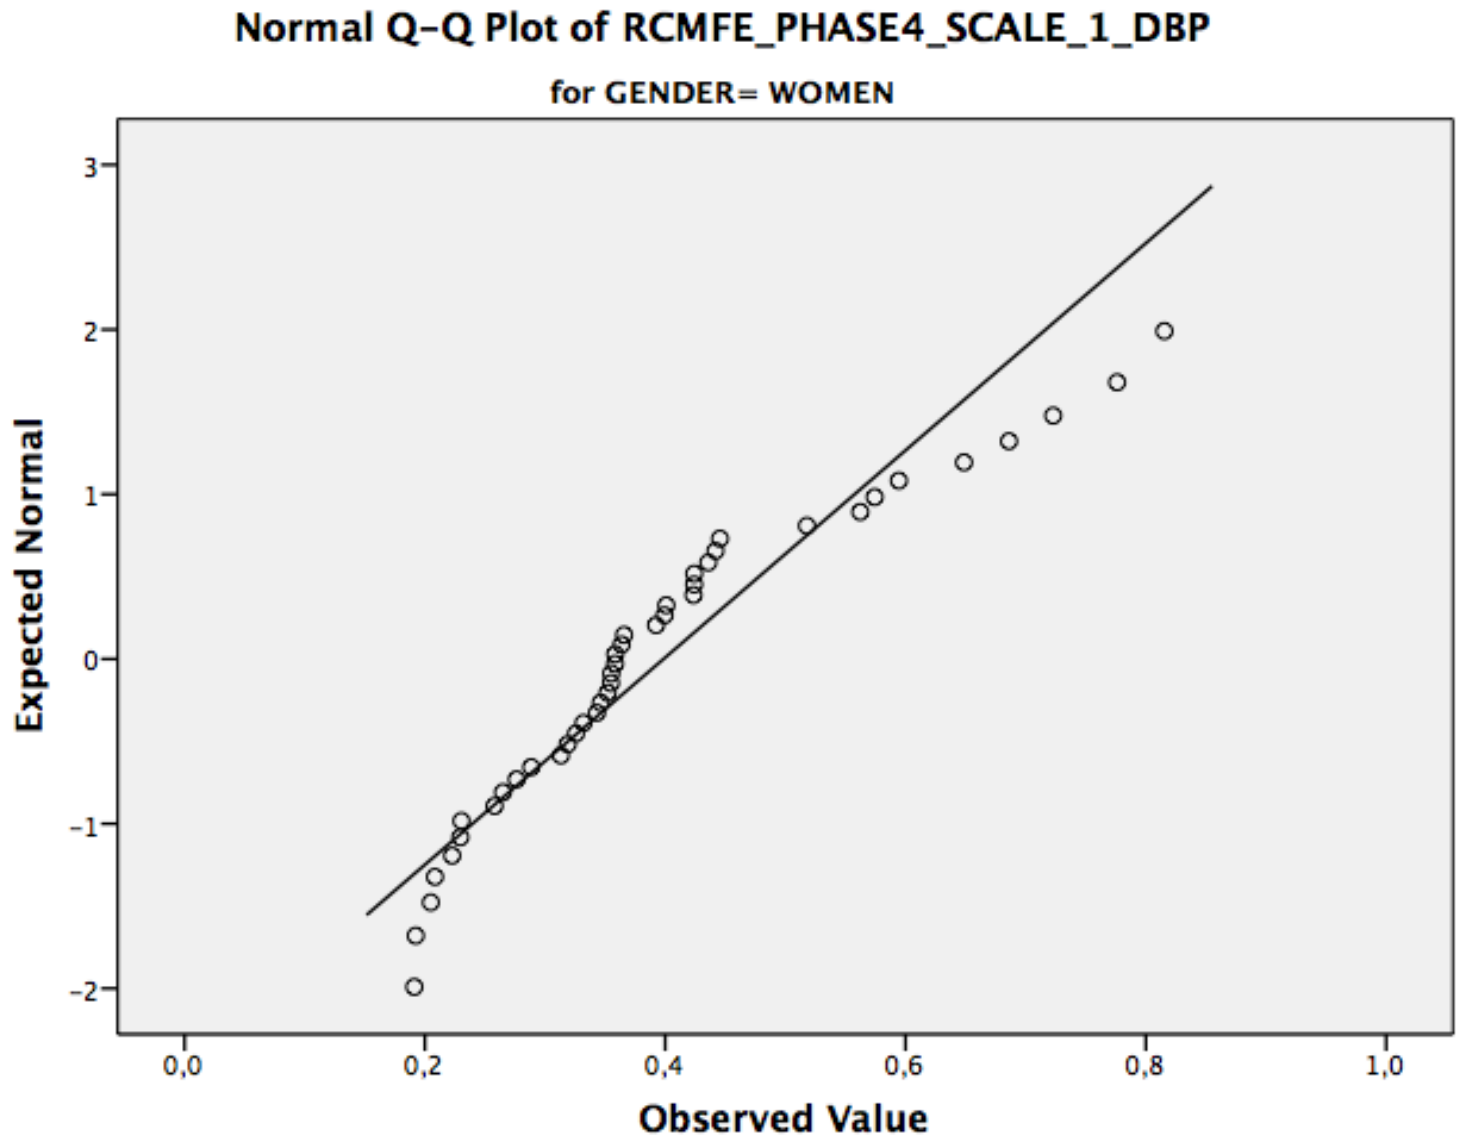



# Normal Q-Q Plot of RCMFE\_PHASE4\_SCALE\_1\_DBP

for GENDER= MEN

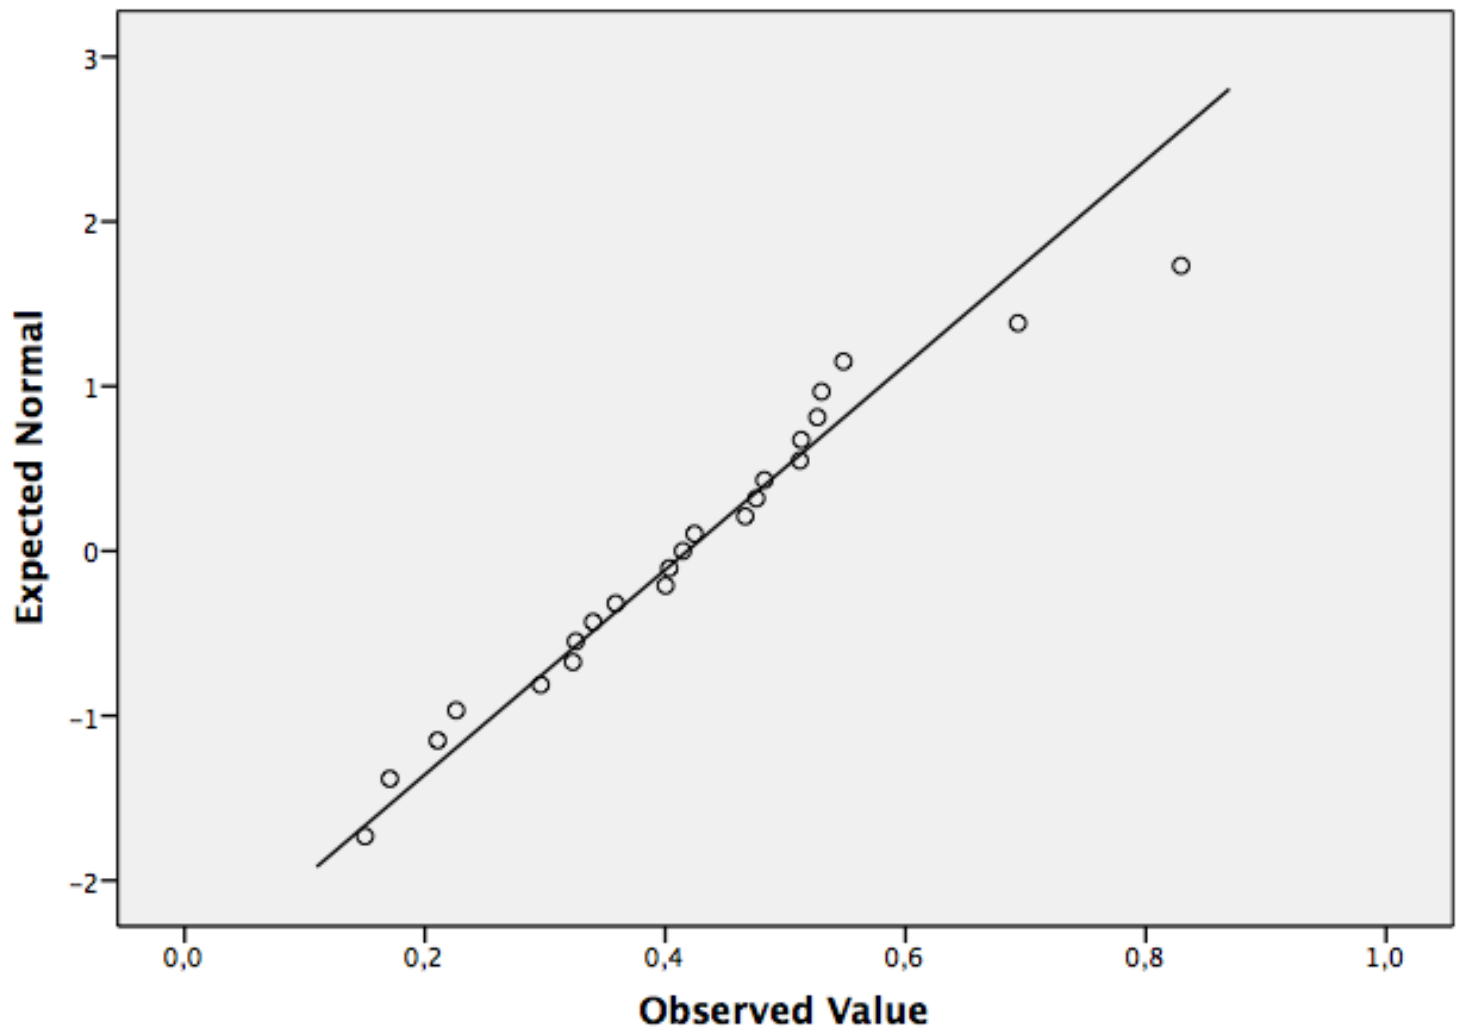

Normal Q-Q Plots

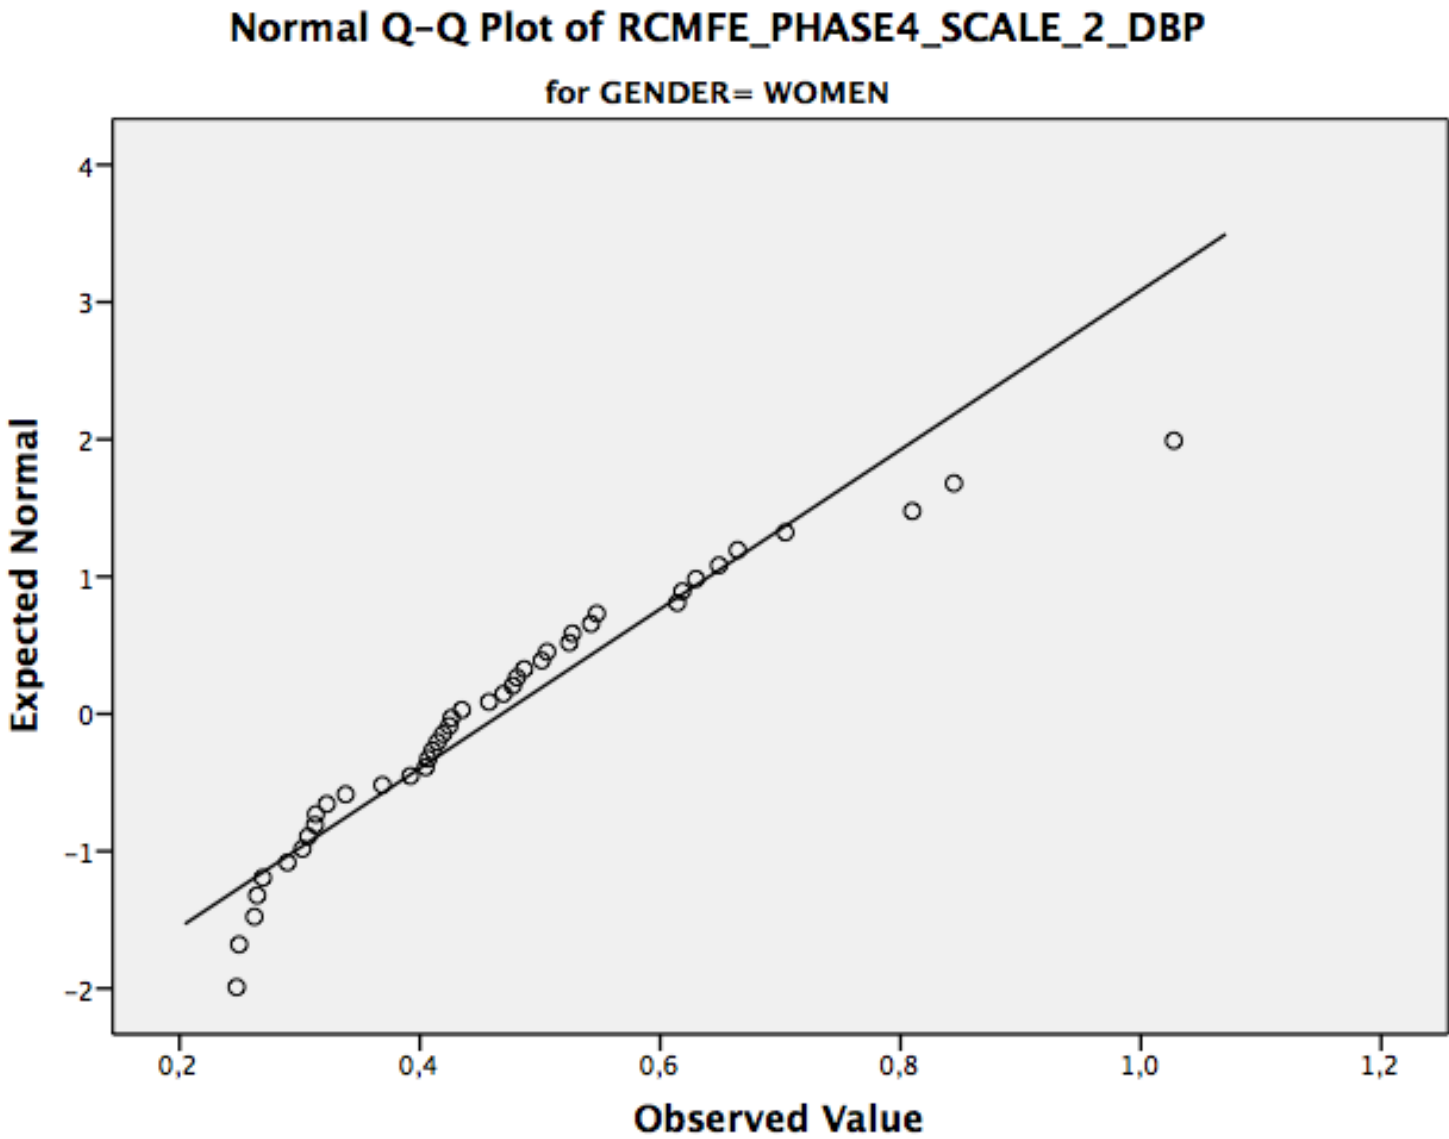

# Normal Q-Q Plot of RCMFE\_PHASE4\_SCALE\_2\_DBP

for GENDER= MEN

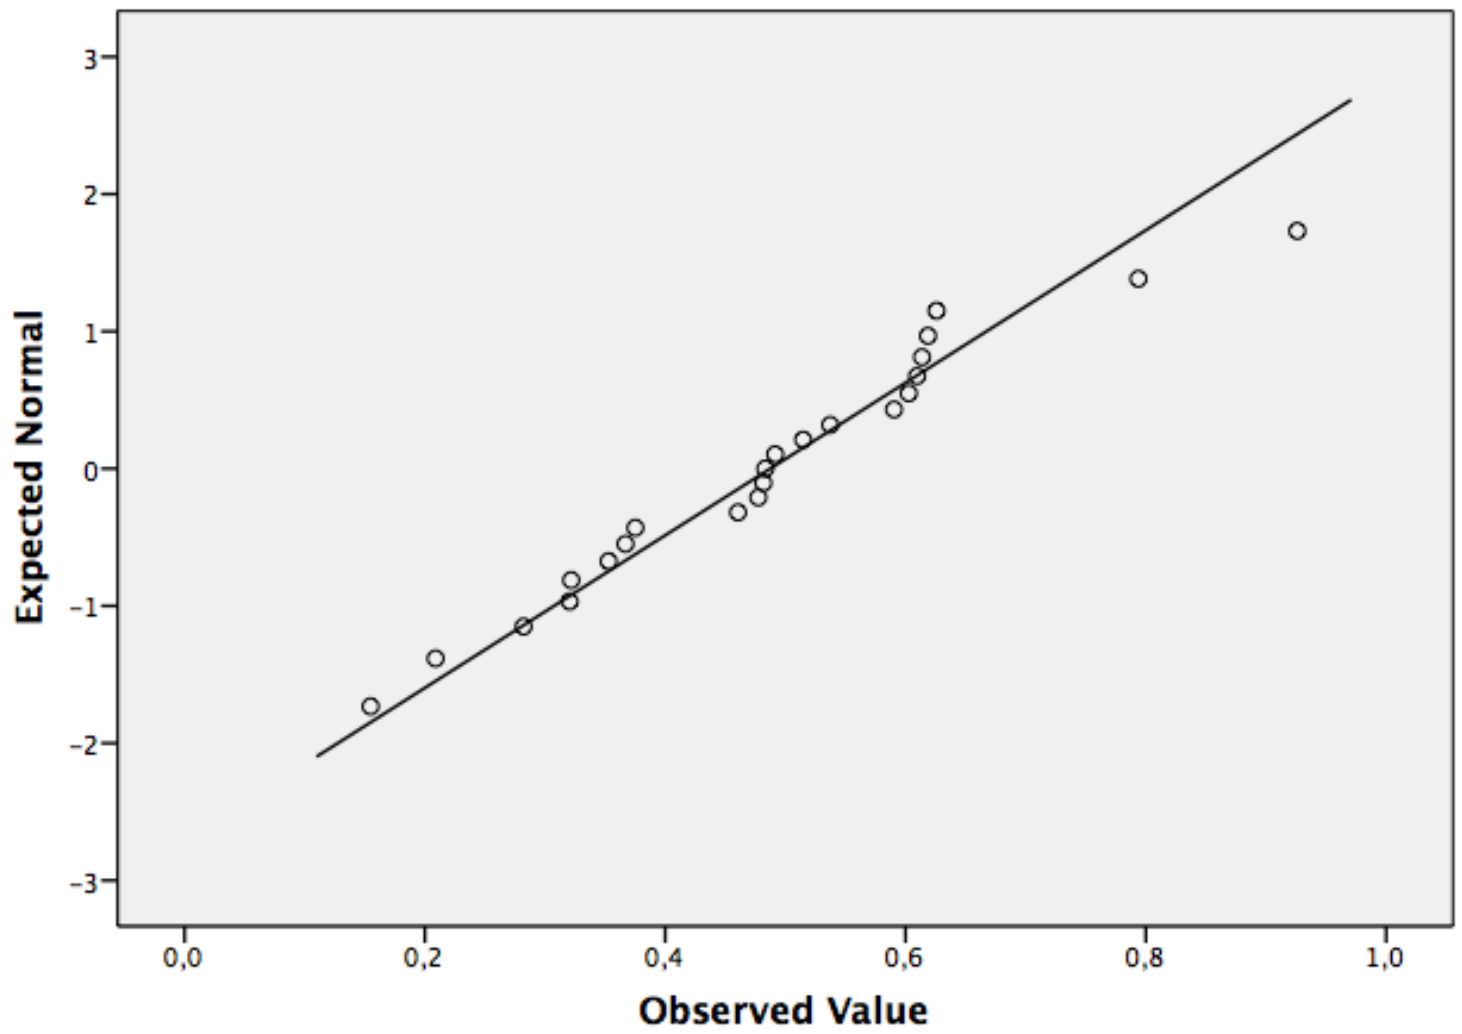

Normal Q-Q Plots

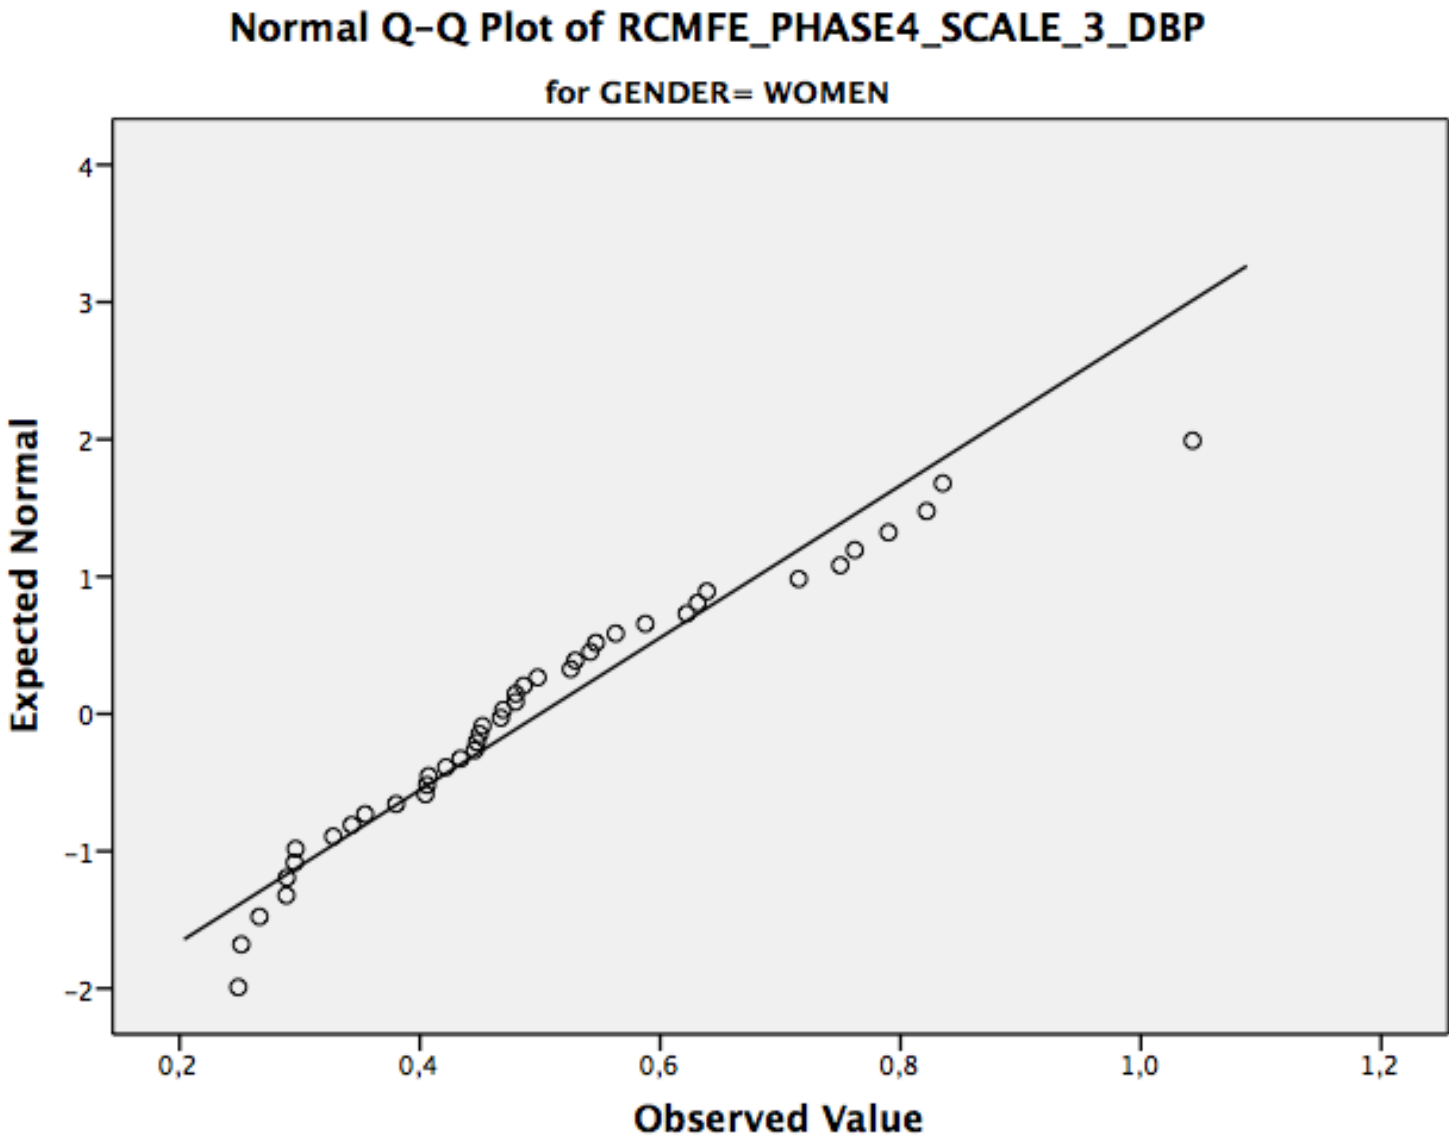

# Normal Q-Q Plot of RCMFE\_PHASE4\_SCALE\_3\_DBP

for GENDER= MEN

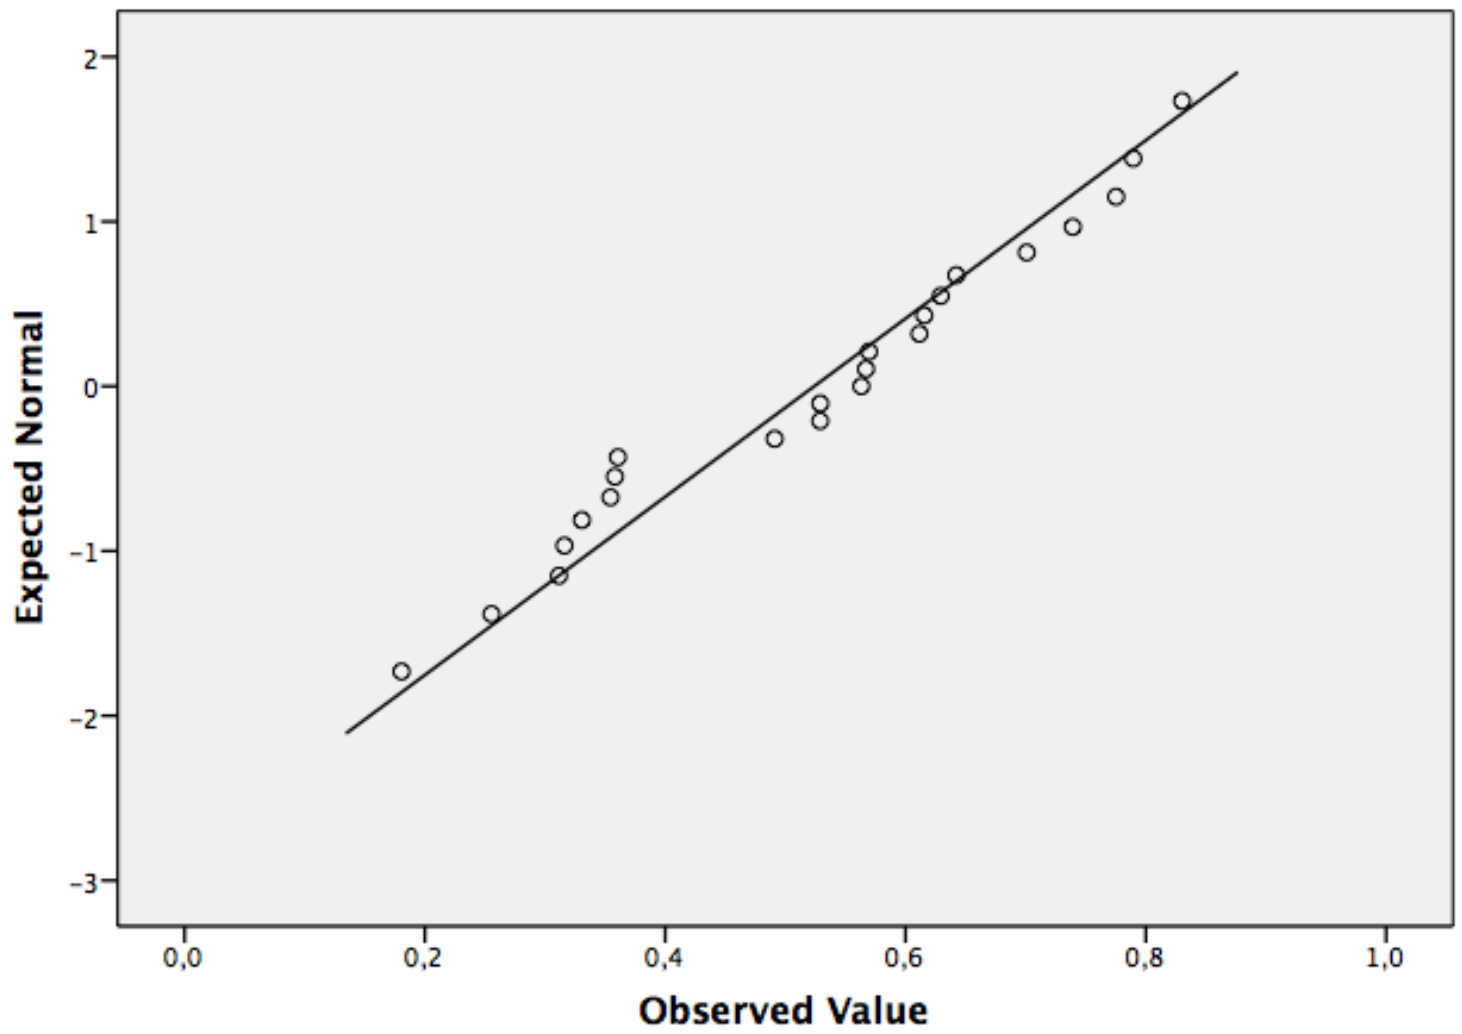

Normal Q-Q Plots

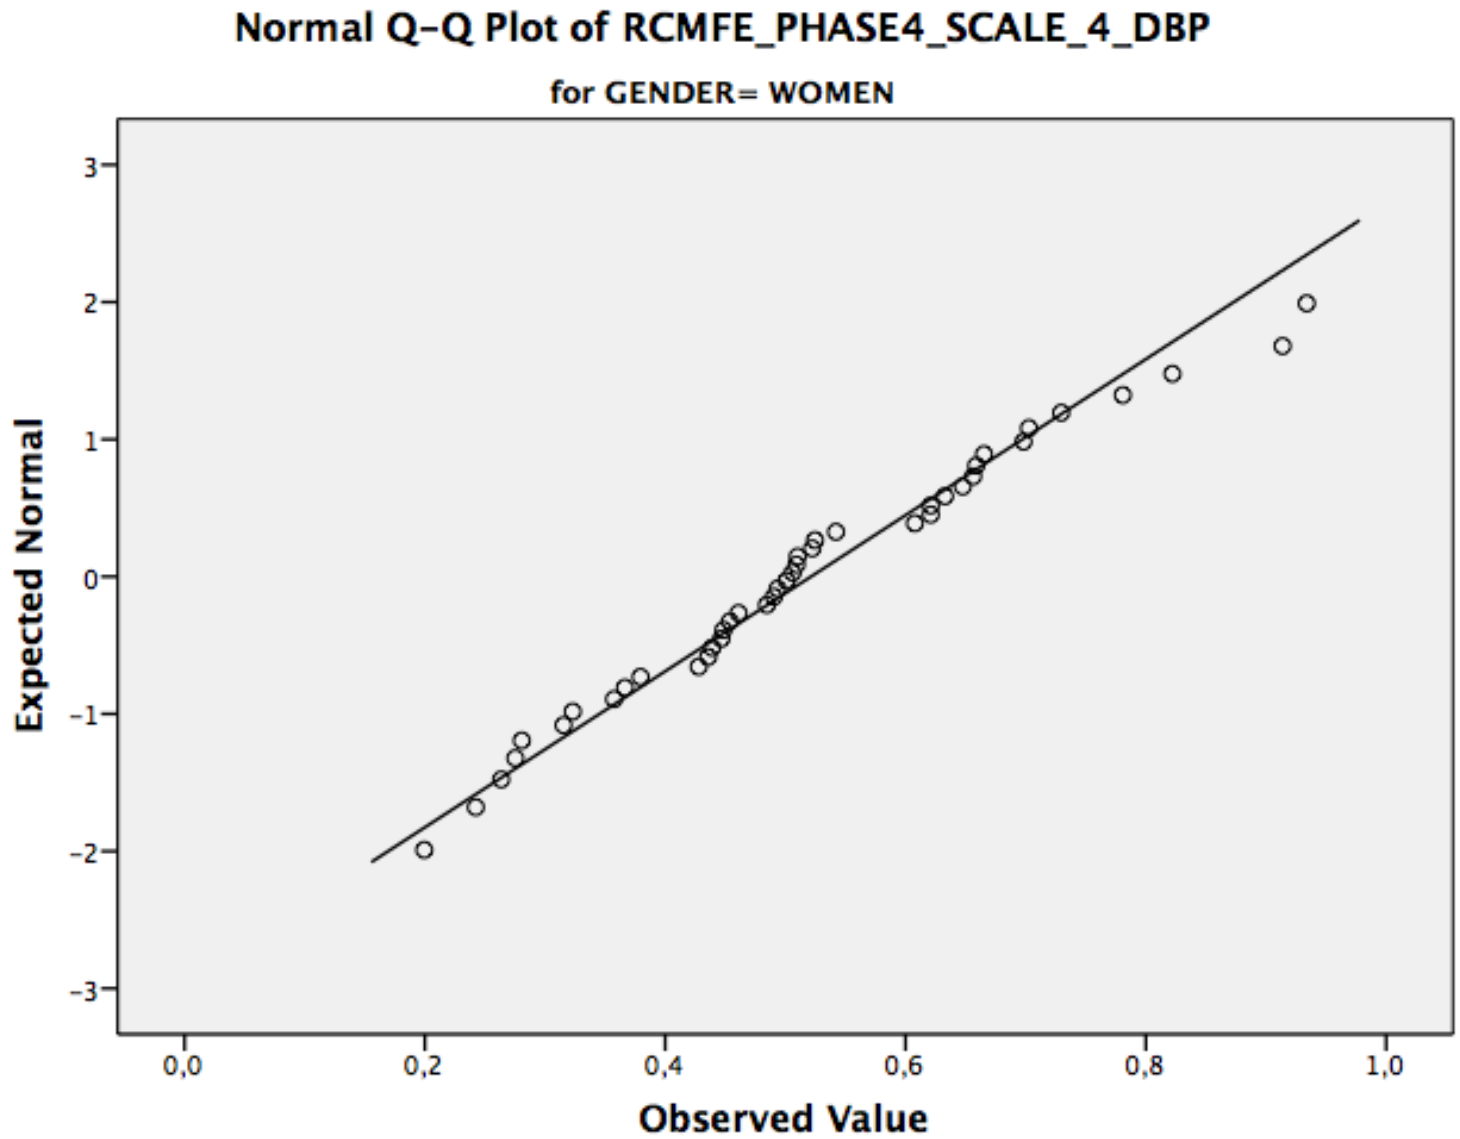

# Normal Q-Q Plot of RCMFE\_PHASE4\_SCALE\_4\_DBP

for GENDER= MEN

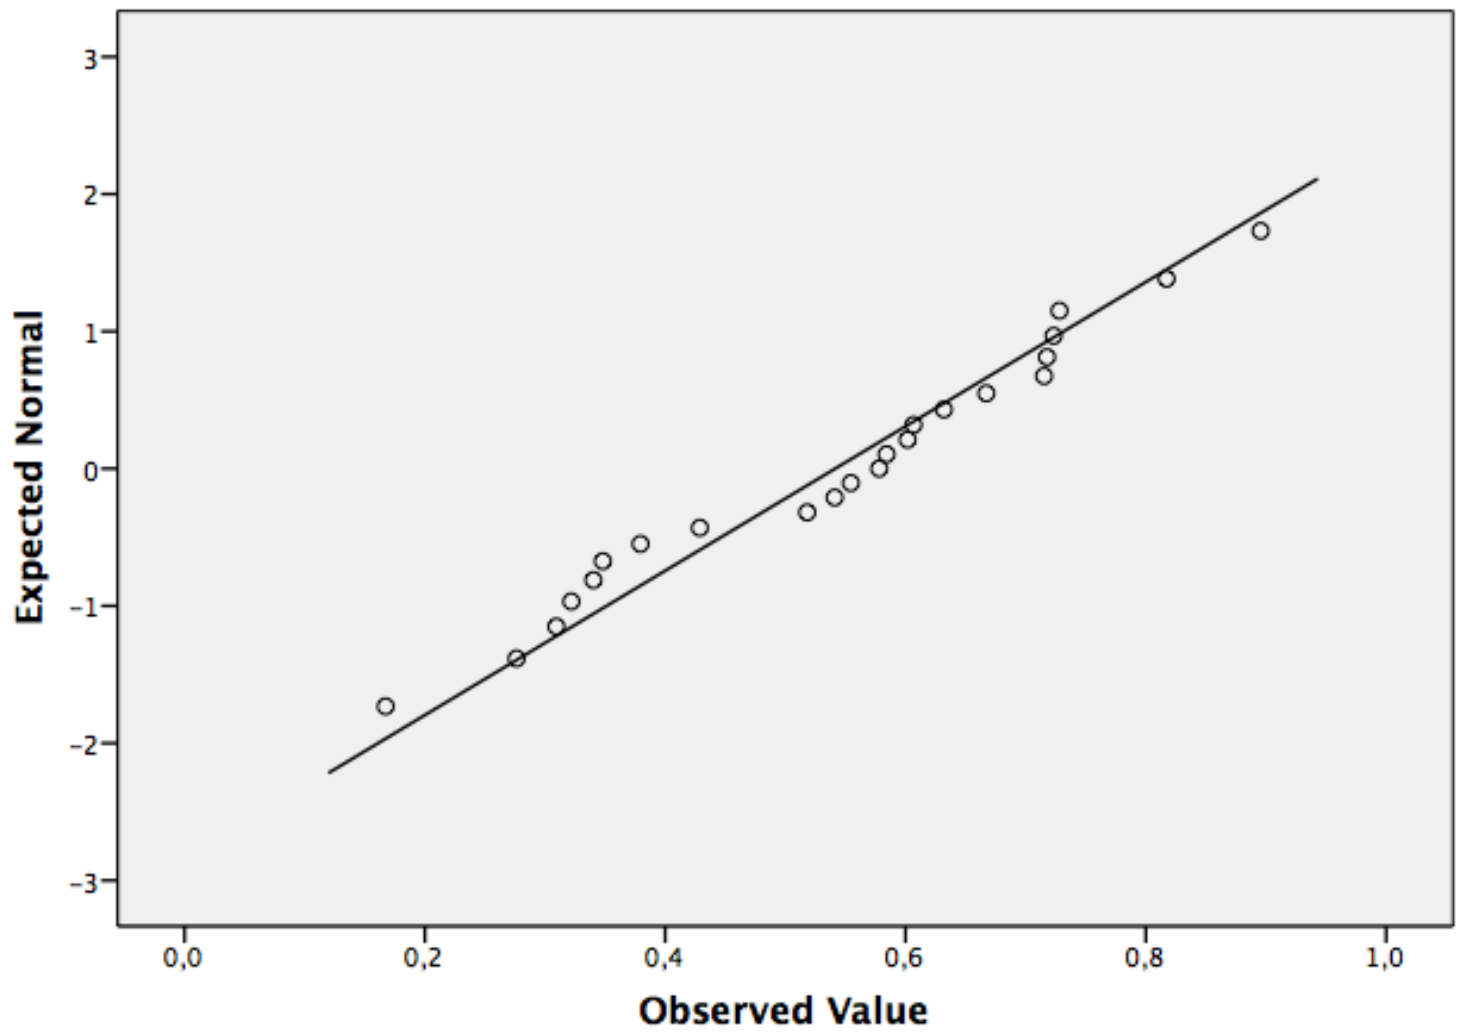

## Normal Q-Q Plots

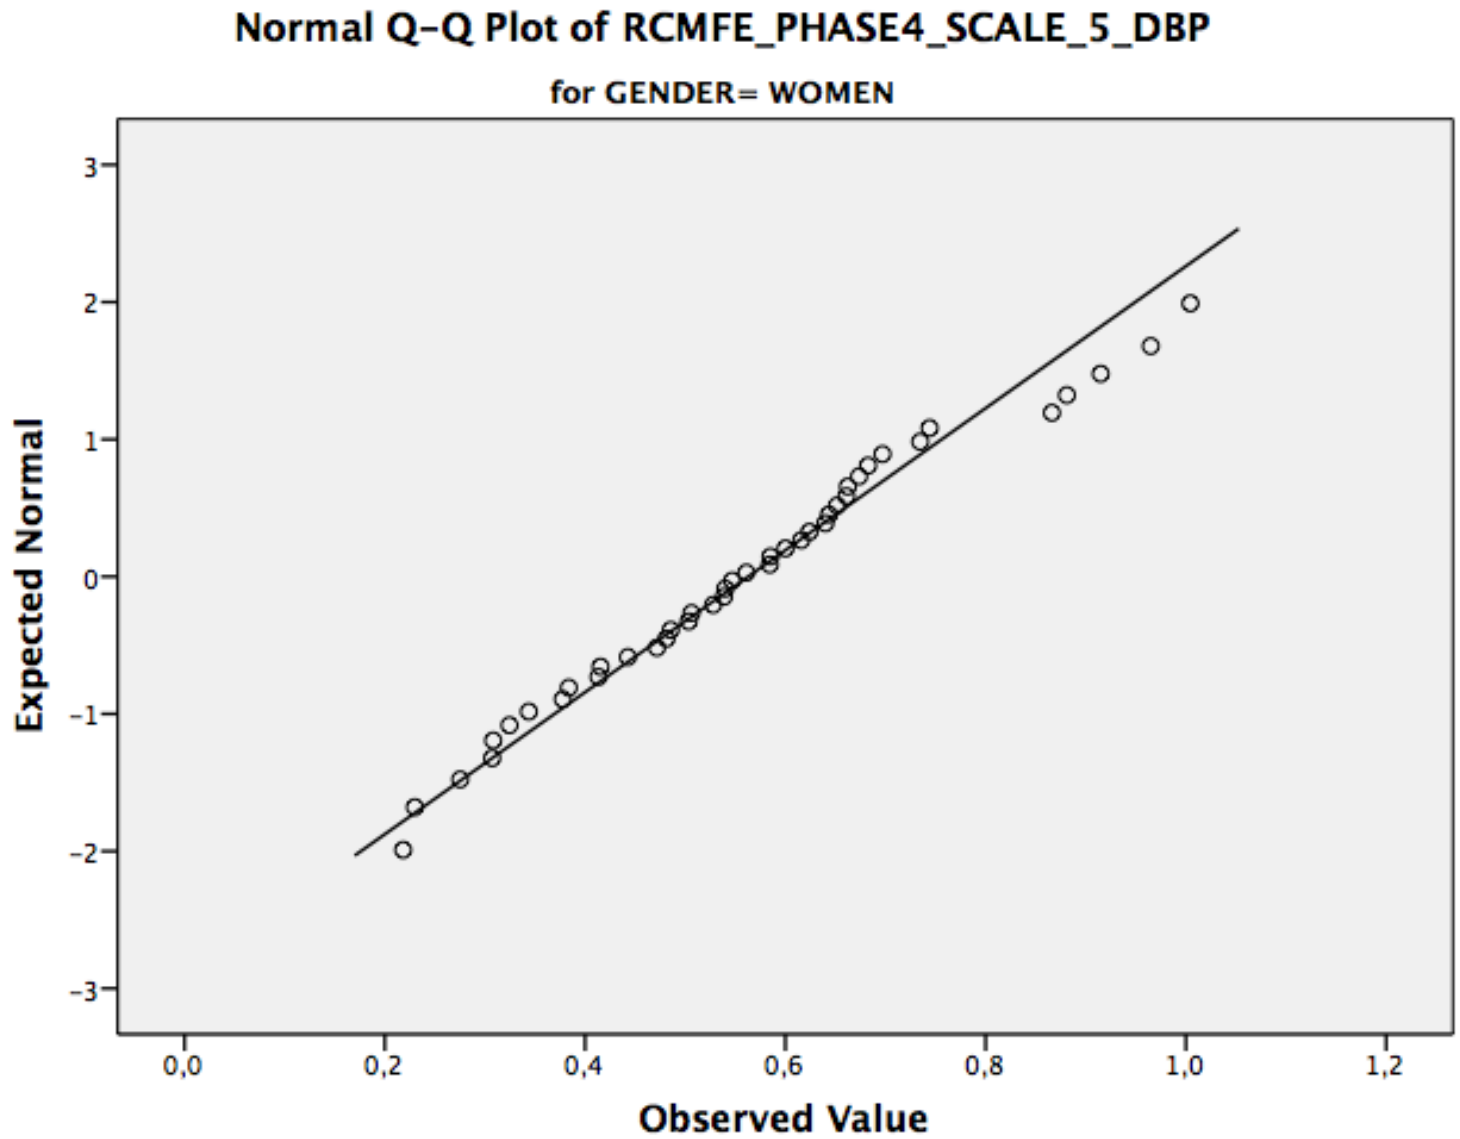



# Normal Q-Q Plot of RCMFE\_PHASE4\_SCALE\_5\_DBP

for GENDER= MEN

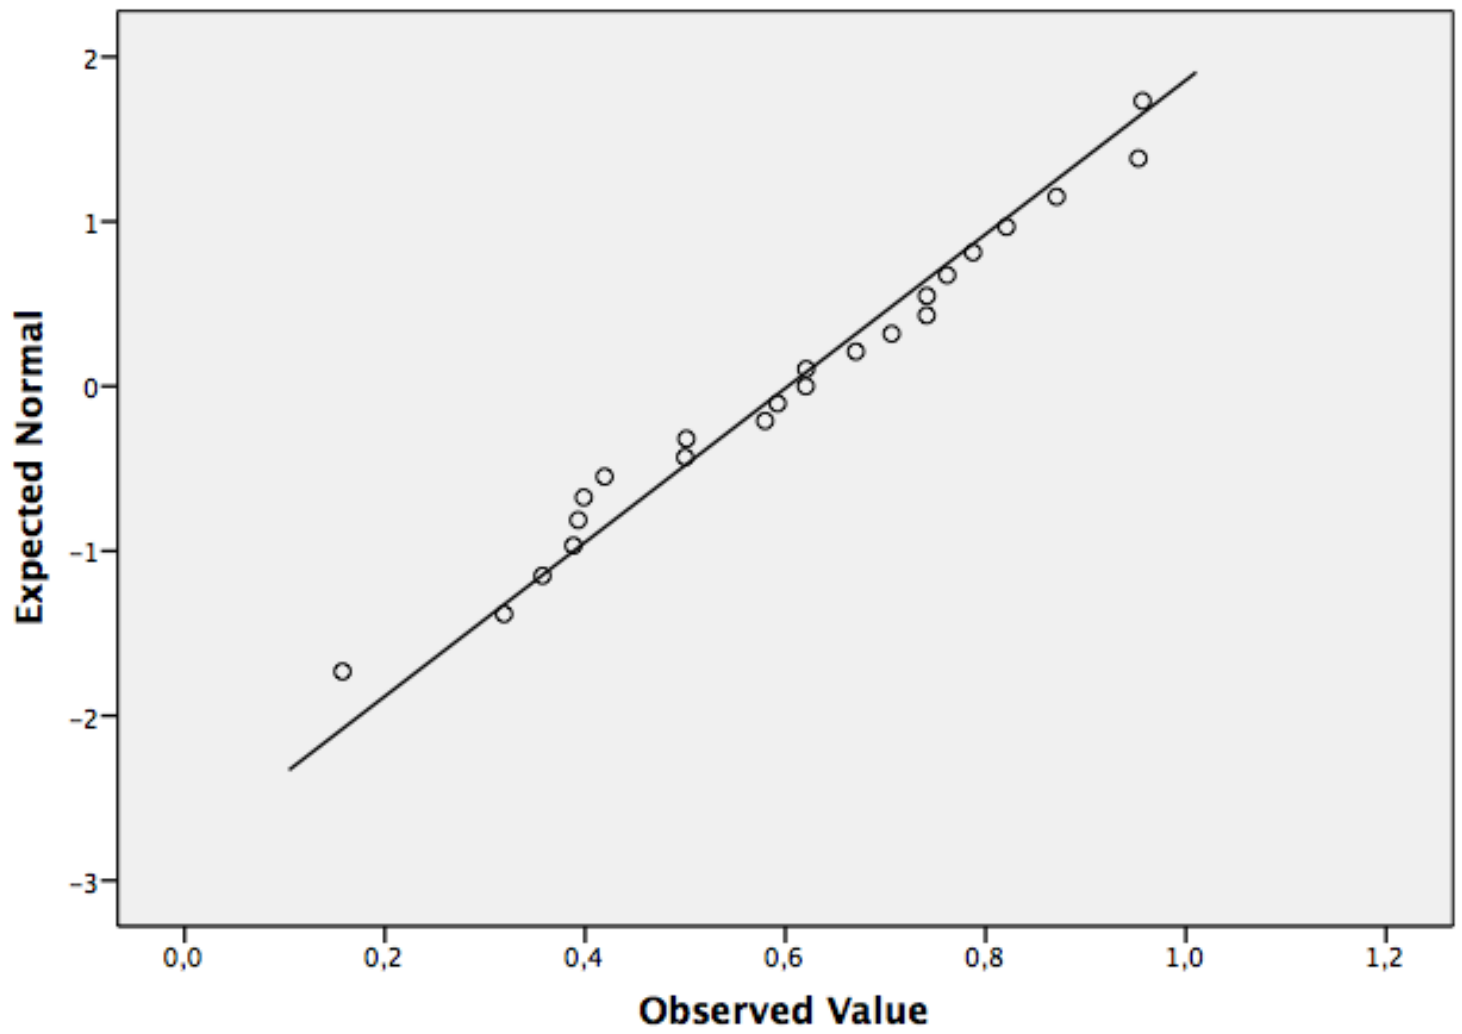

Normal Q-Q Plots

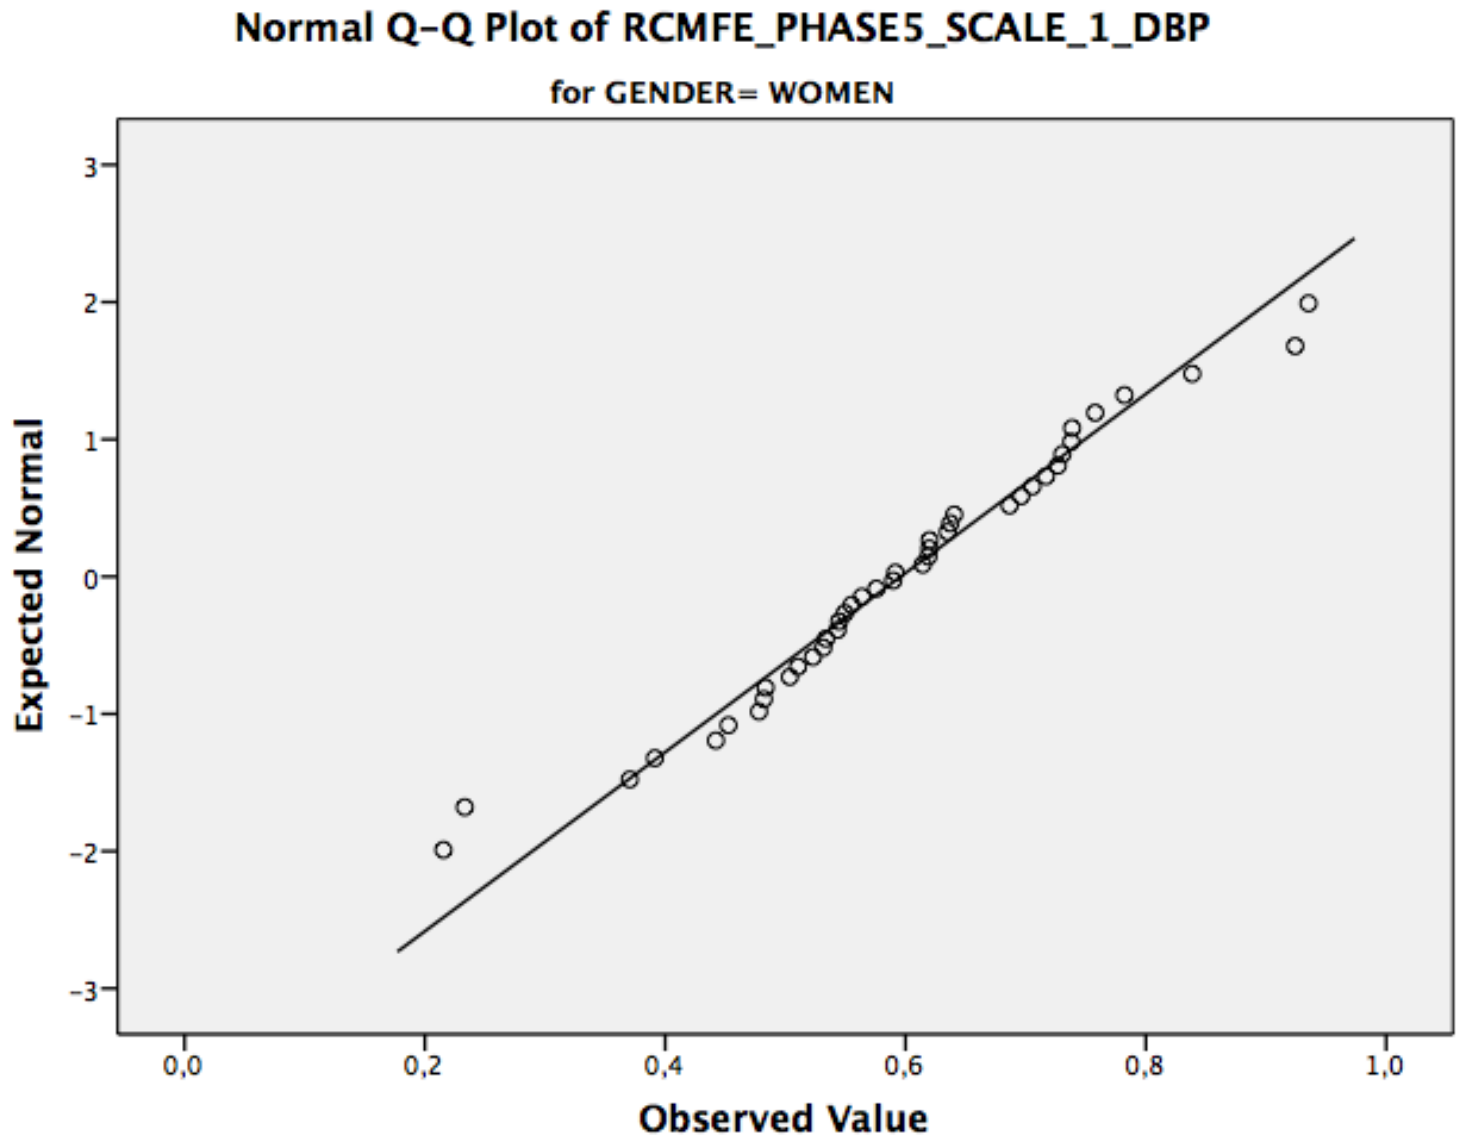

# Normal Q-Q Plot of RCMFE\_PHASE5\_SCALE\_1\_DBP

for GENDER= MEN

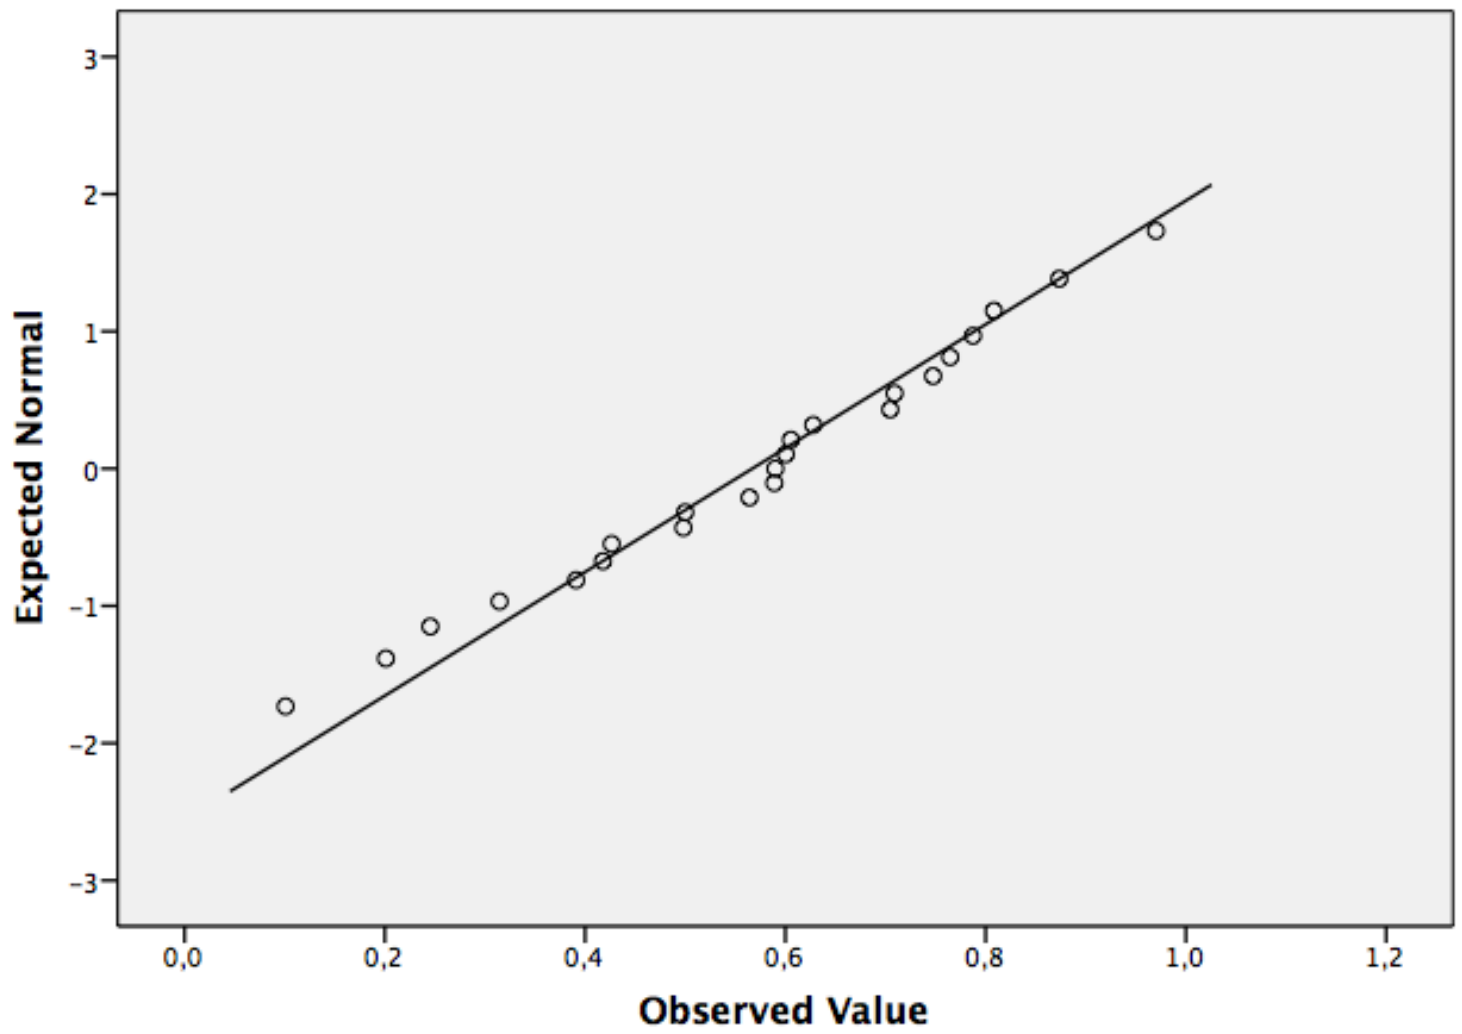

Normal Q-Q Plots

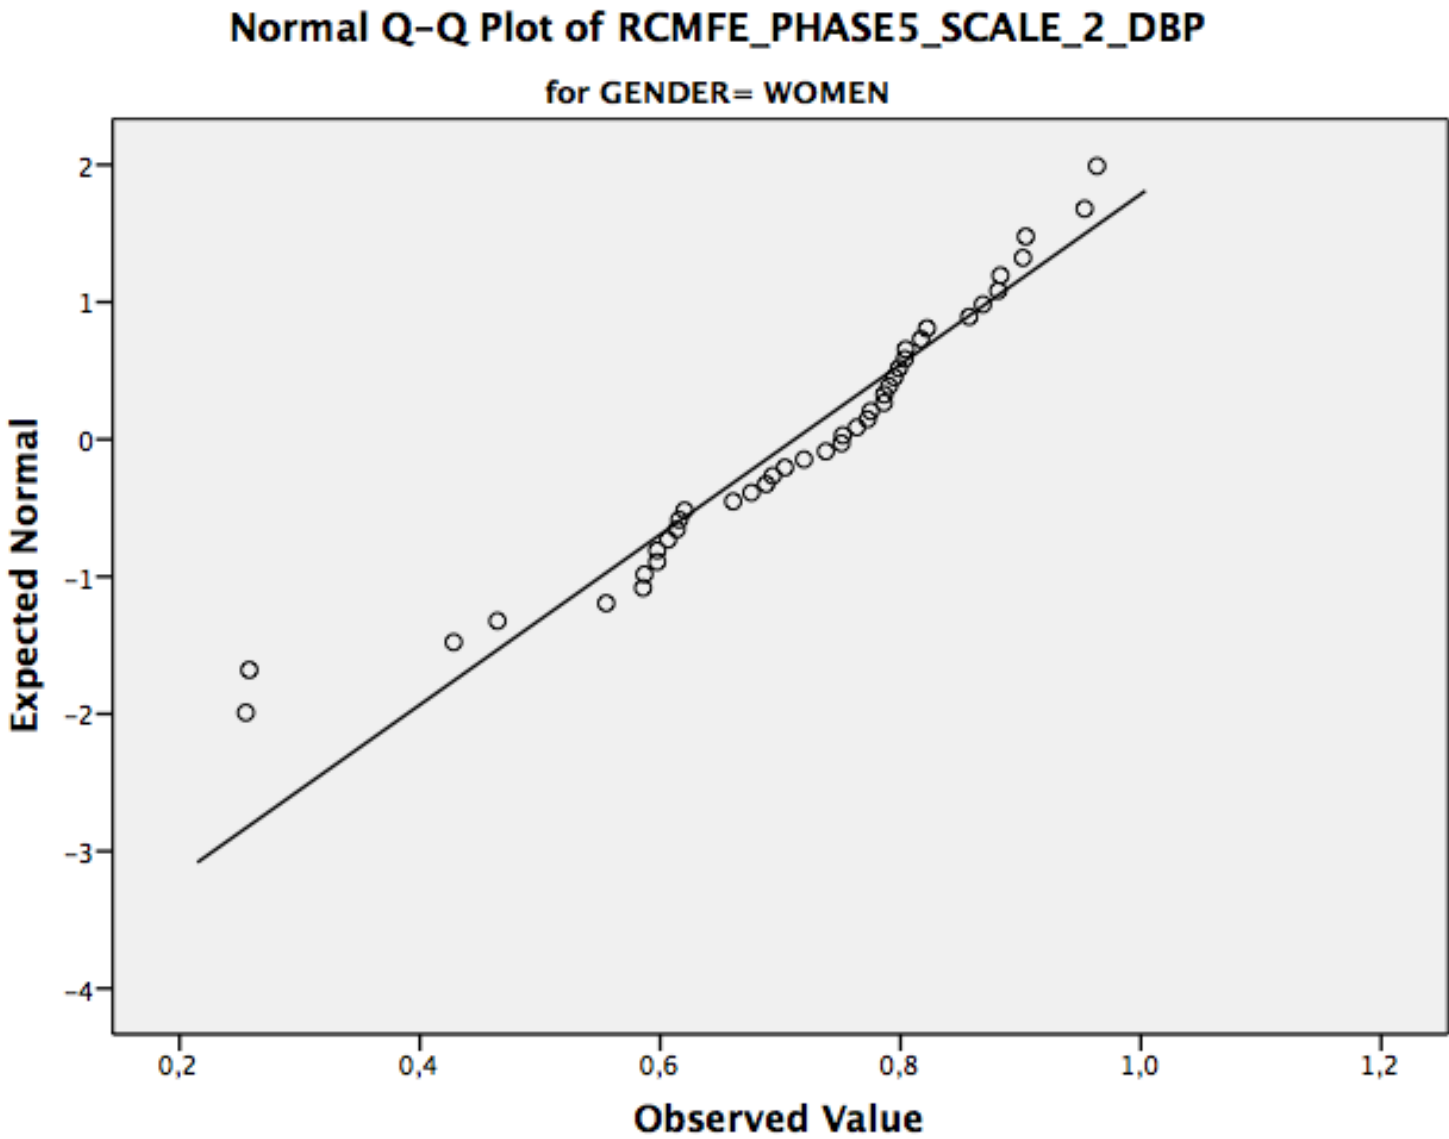

# Normal Q-Q Plot of RCMFE\_PHASE5\_SCALE\_2\_DBP

for GENDER= MEN

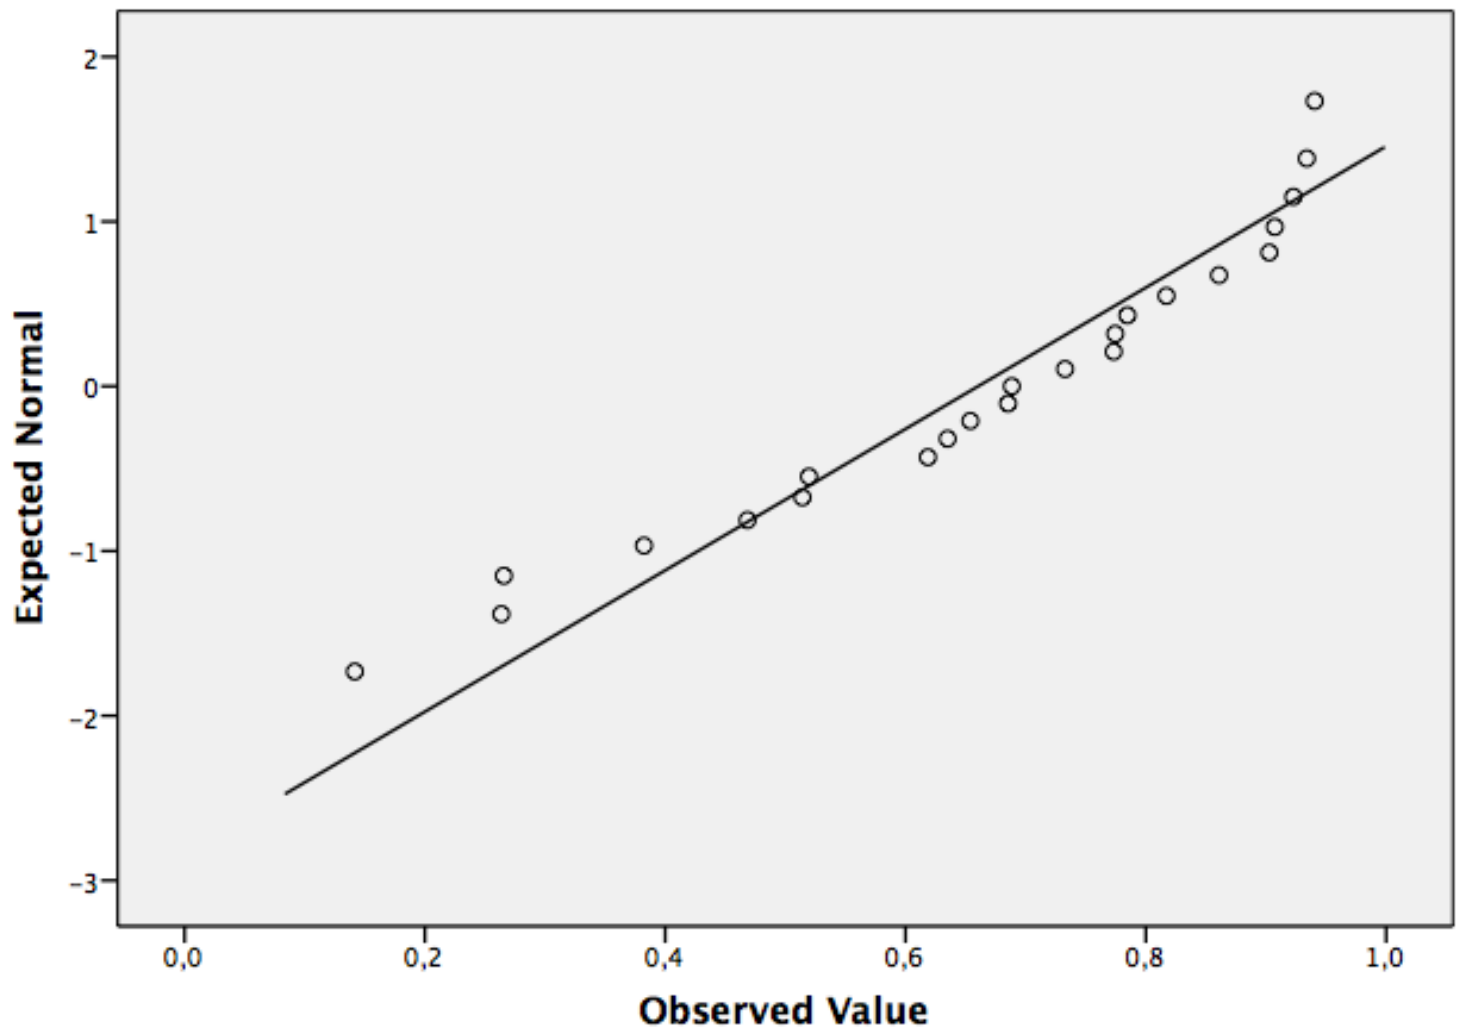

Normal Q-Q Plots

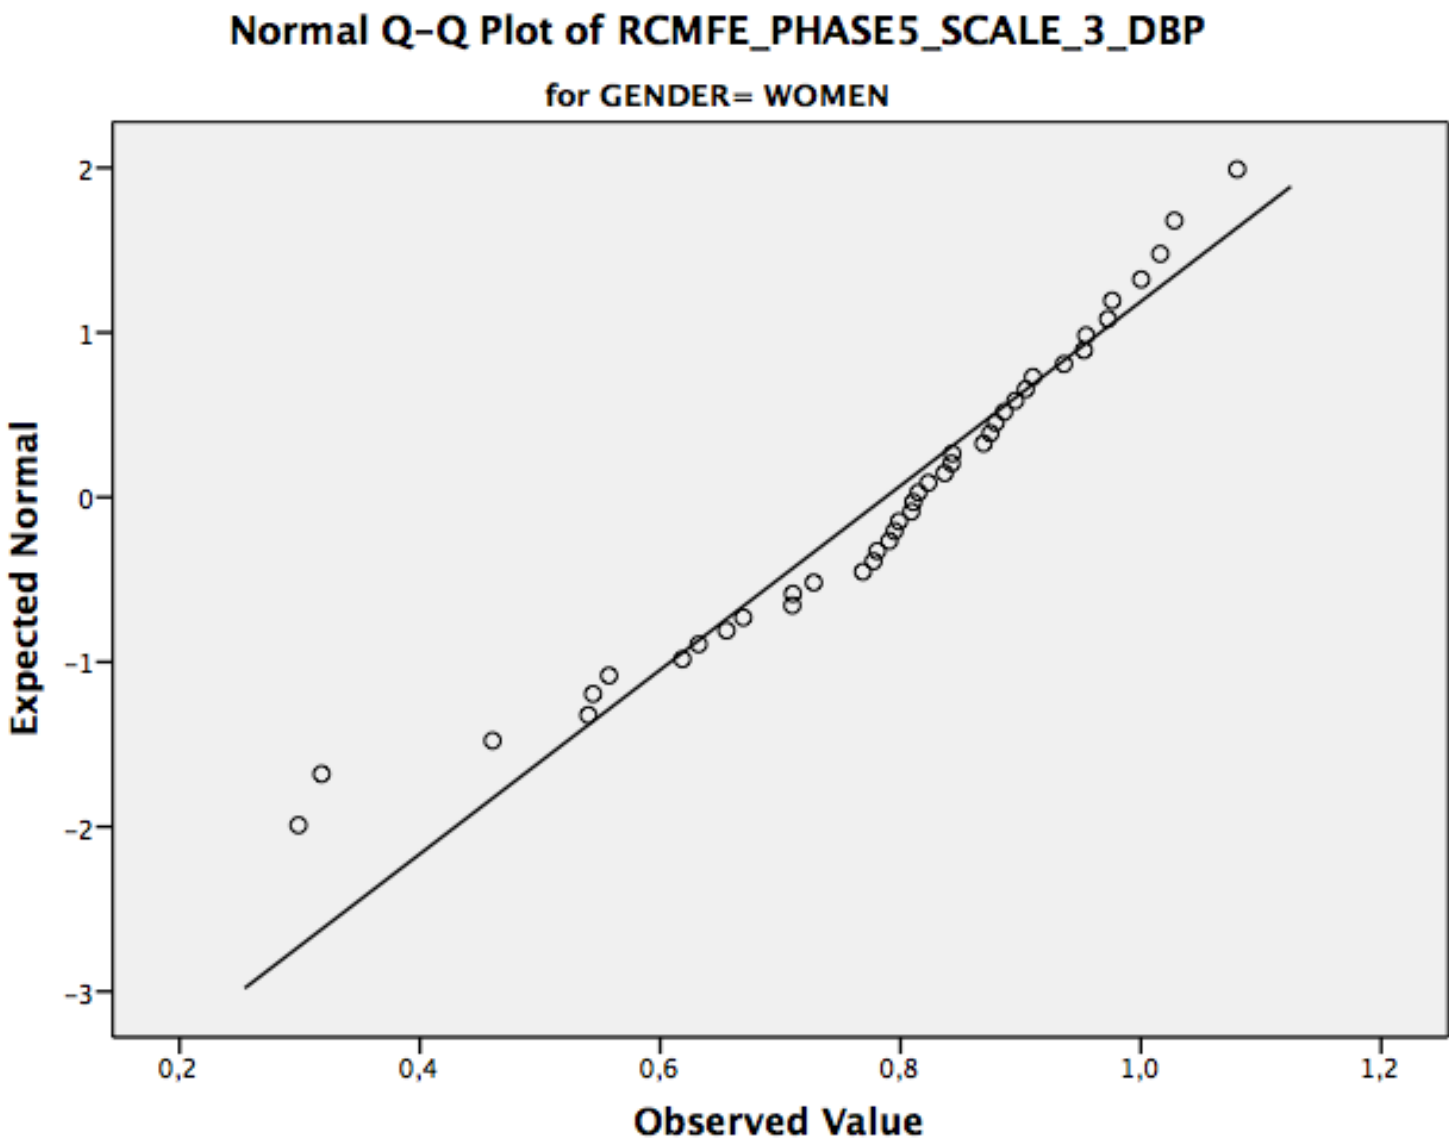

# Normal Q-Q Plot of RCMFE\_PHASE5\_SCALE\_3\_DBP

for GENDER= MEN

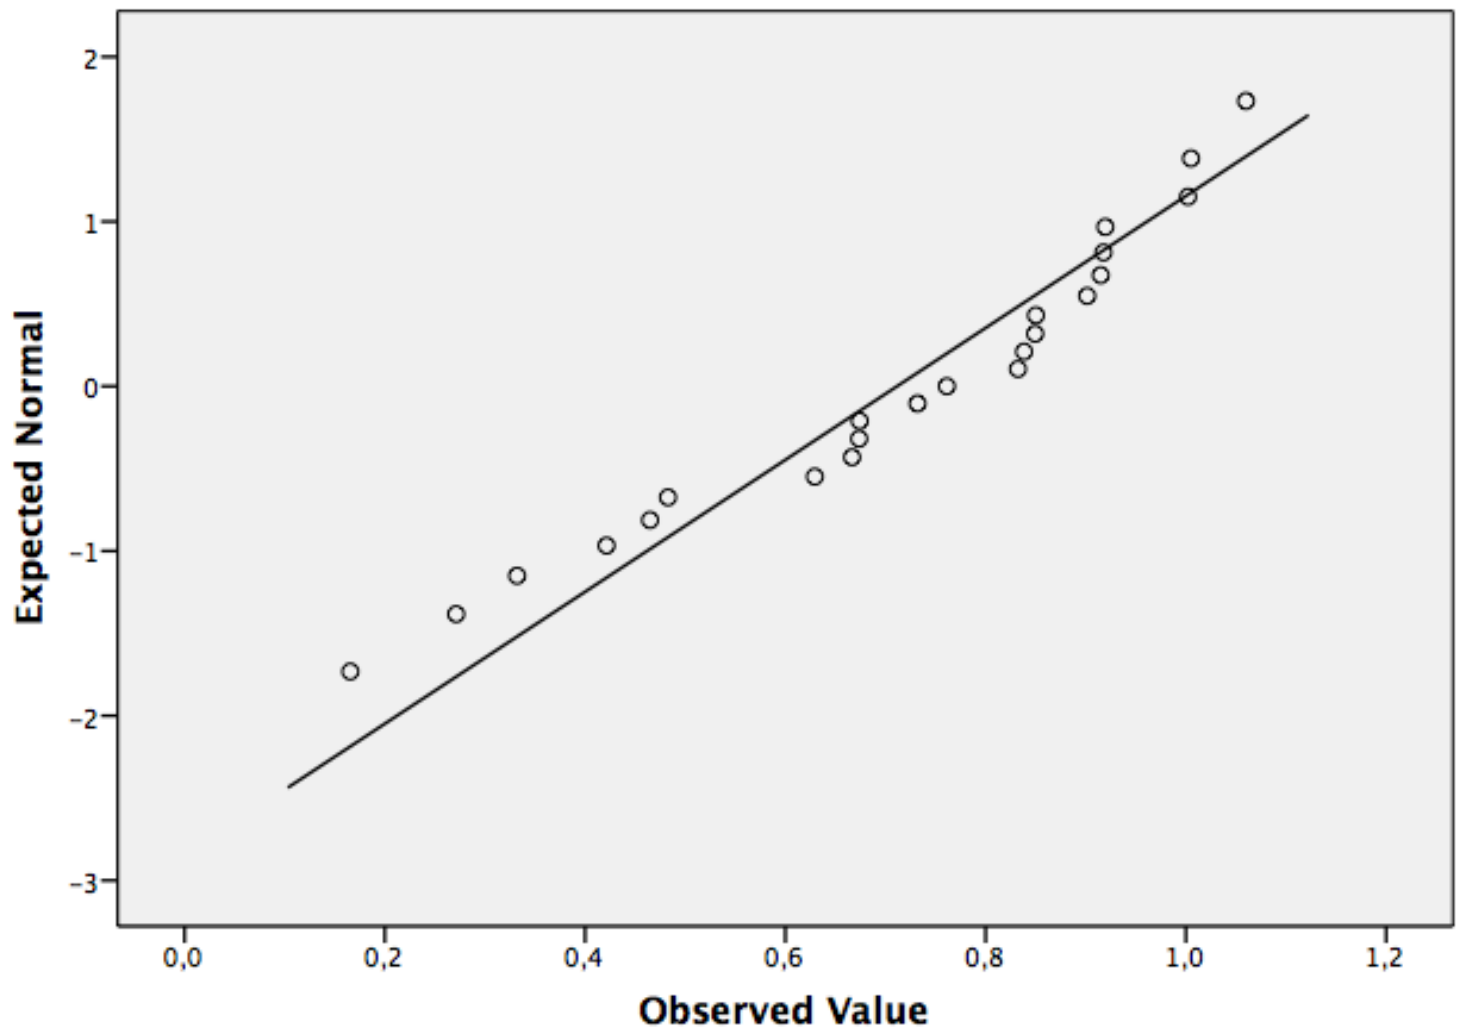

Normal Q-Q Plots

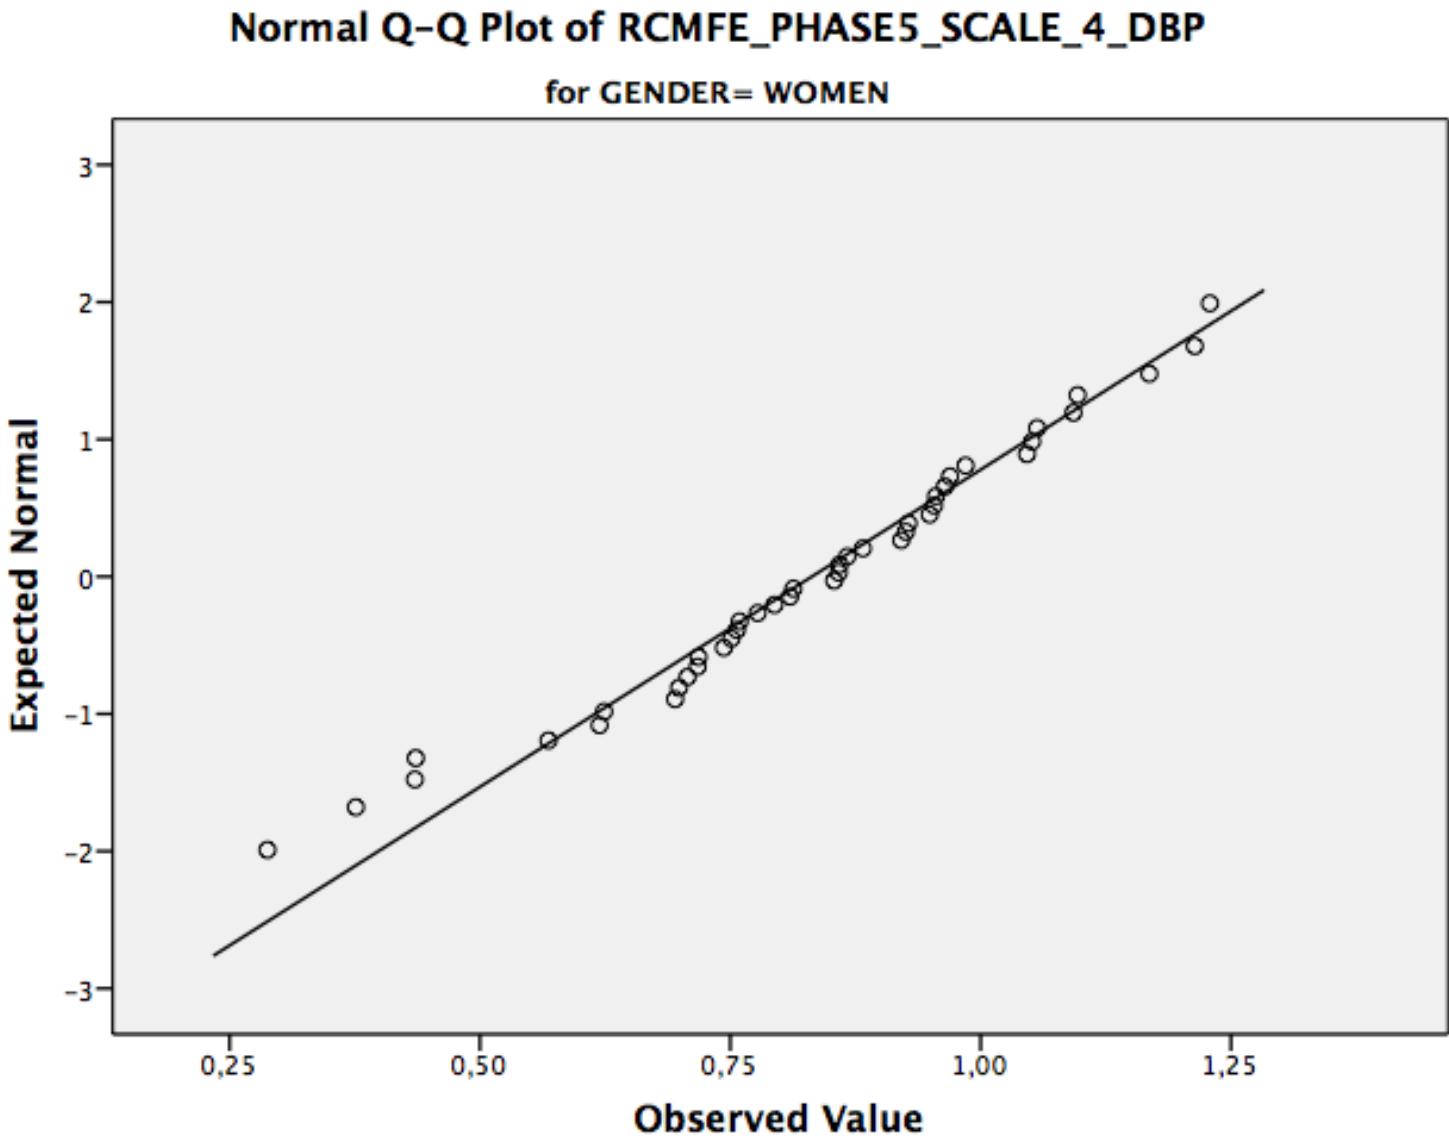



# Normal Q-Q Plot of RCMFE\_PHASE5\_SCALE\_4\_DBP

for GENDER= MEN

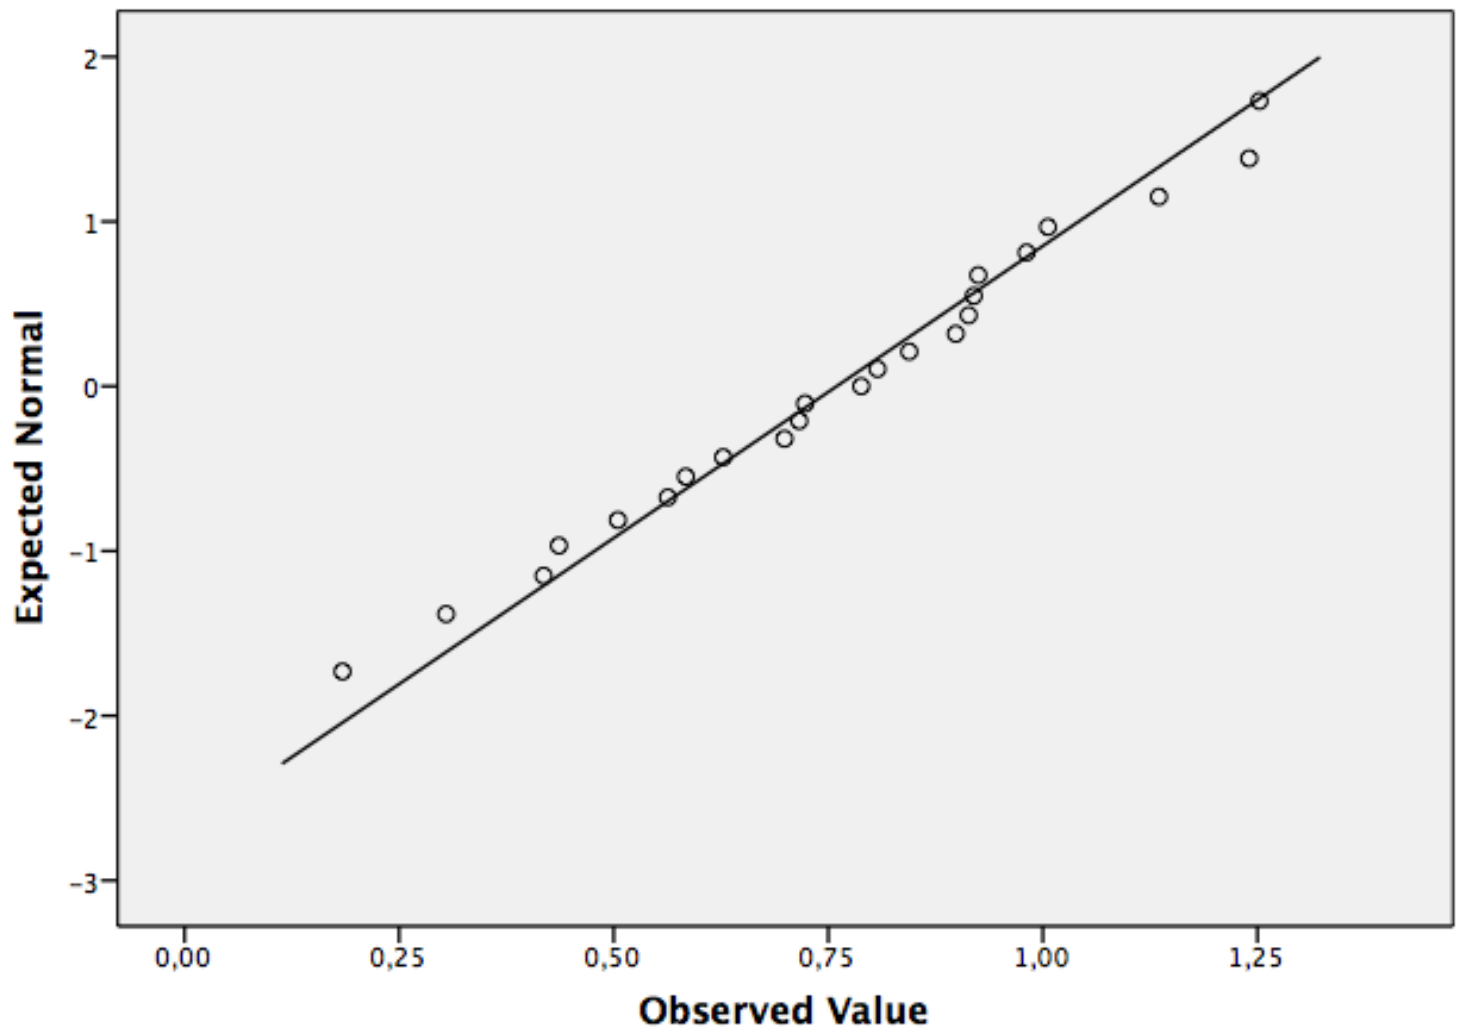

Normal Q-Q Plots

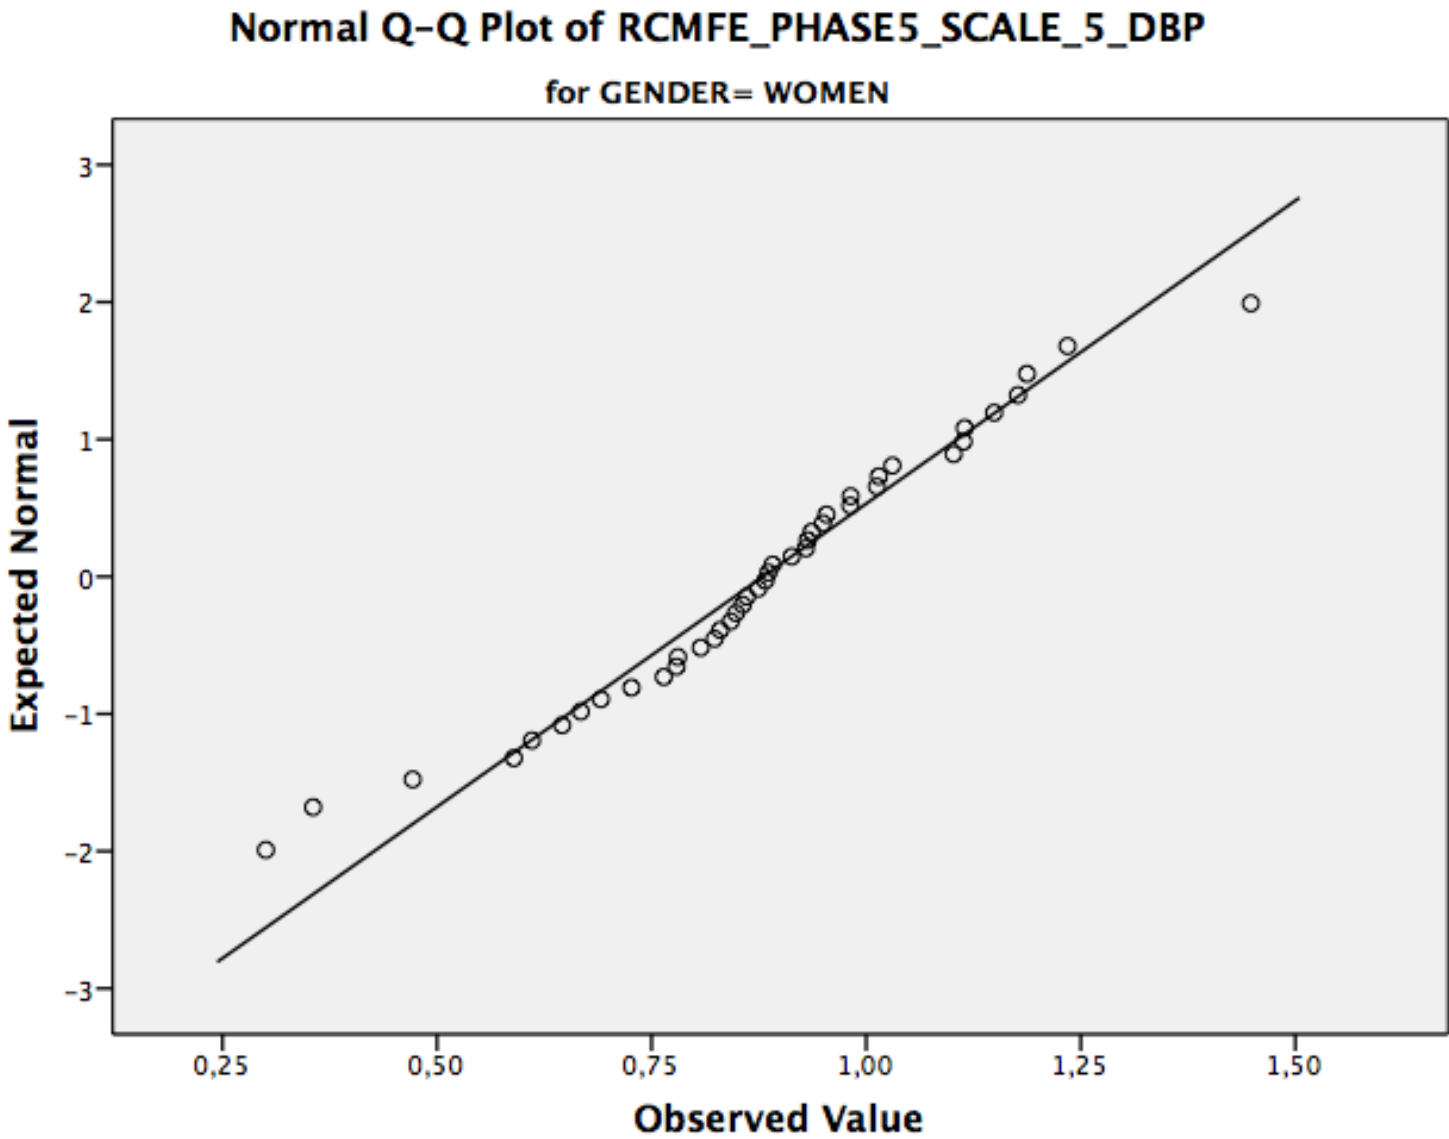

# Normal Q-Q Plot of RCMFE\_PHASE5\_SCALE\_5\_DBP

for GENDER= MEN

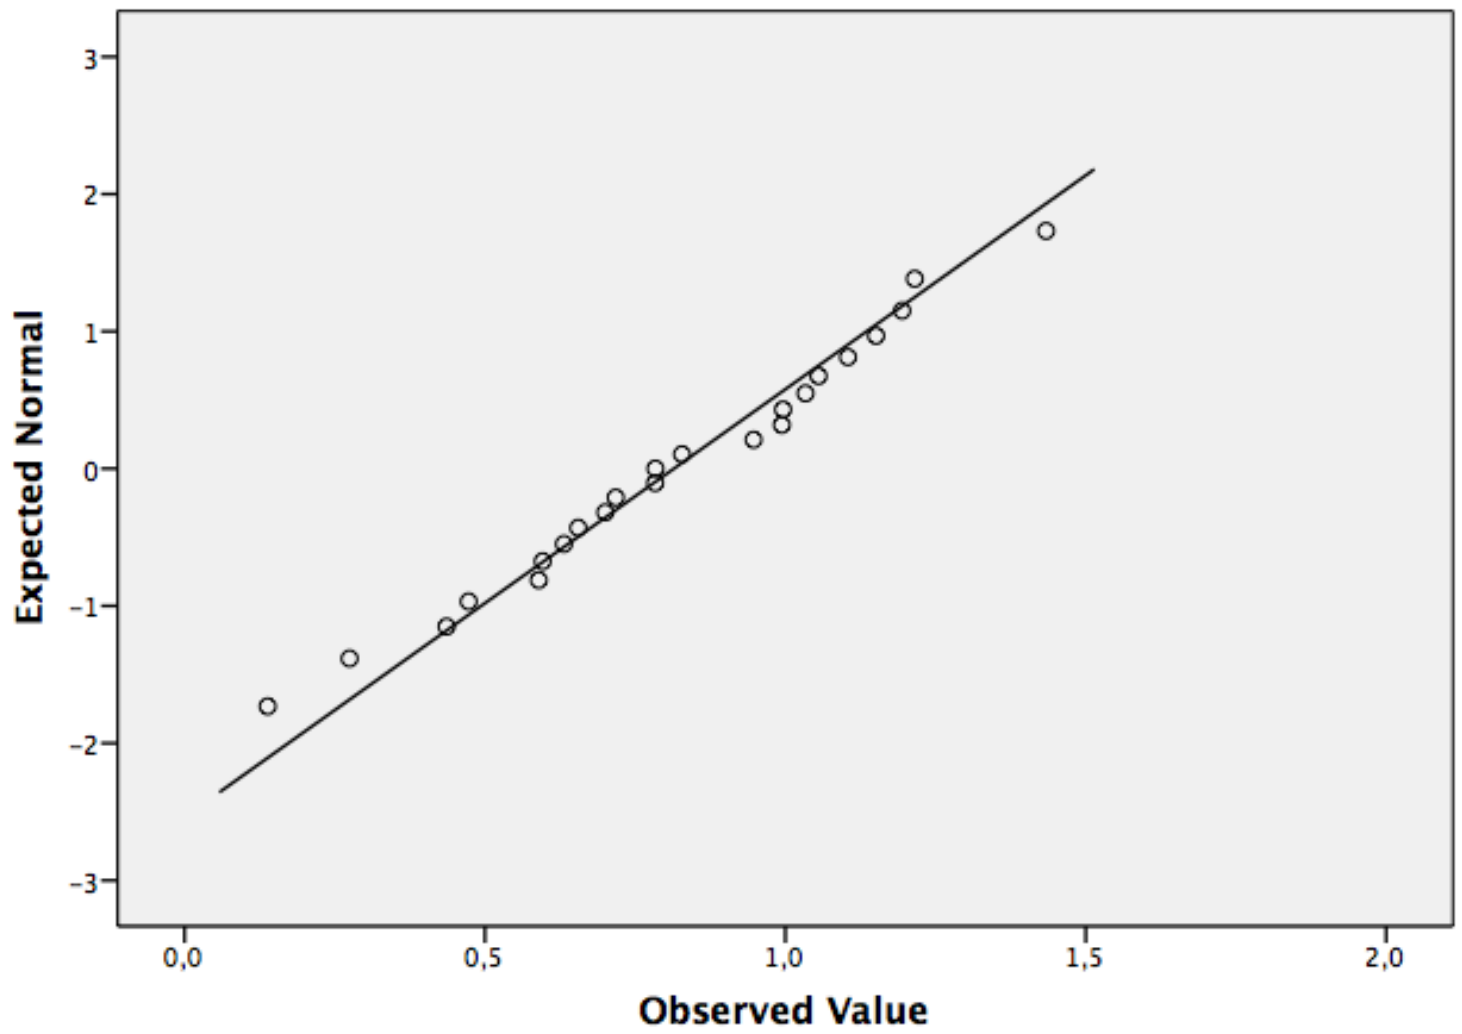

## PATHOLOGY

## Case Processing Summary

| PATHOLOGY                  | Cases |         |         |         |       |         |
|----------------------------|-------|---------|---------|---------|-------|---------|
|                            | Valid |         | Missing |         | Total |         |
|                            | N     | Percent | N       | Percent | N     | Percent |
| RCMFE_PHASE1_SCALE_1 NO-OI | 29    | 100,0%  | 0       | 0,0%    | 29    | 100,0%  |
| _DBP OI                    | 36    | 100,0%  | 0       | 0,0%    | 36    | 100,0%  |
| RCMFE_PHASE1_SCALE_2 NO-OI | 29    | 100,0%  | 0       | 0,0%    | 29    | 100,0%  |
| _DBP OI                    | 36    | 100,0%  | 0       | 0,0%    | 36    | 100,0%  |
| RCMFE_PHASE1_SCALE_3 NO-OI | 29    | 100,0%  | 0       | 0,0%    | 29    | 100,0%  |
| _DBP OI                    | 36    | 100,0%  | 0       | 0,0%    | 36    | 100,0%  |
| RCMFE_PHASE1_SCALE_4 NO-OI | 29    | 100,0%  | 0       | 0,0%    | 29    | 100,0%  |
| _DBP OI                    | 36    | 100,0%  | 0       | 0,0%    | 36    | 100,0%  |
| RCMFE_PHASE1_SCALE_5 NO-OI | 29    | 100,0%  | 0       | 0,0%    | 29    | 100,0%  |
| _DBP OI                    | 36    | 100,0%  | 0       | 0,0%    | 36    | 100,0%  |
| RCMFE_PHASE2_SCALE_1 NO-OI | 29    | 100,0%  | 0       | 0,0%    | 29    | 100,0%  |
| _DBP OI                    | 36    | 100,0%  | 0       | 0,0%    | 36    | 100,0%  |
| RCMFE_PHASE2_SCALE_2 NO-OI | 29    | 100,0%  | 0       | 0,0%    | 29    | 100,0%  |
| _DBP OI                    | 36    | 100,0%  | 0       | 0,0%    | 36    | 100,0%  |
| RCMFE_PHASE2_SCALE_3 NO-OI | 29    | 100,0%  | 0       | 0,0%    | 29    | 100,0%  |
| _DBP OI                    | 36    | 100,0%  | 0       | 0,0%    | 36    | 100,0%  |
| RCMFE_PHASE2_SCALE_4 NO-OI | 29    | 100,0%  | 0       | 0,0%    | 29    | 100,0%  |
| _DBP OI                    | 36    | 100,0%  | 0       | 0,0%    | 36    | 100,0%  |
| RCMFE_PHASE2_SCALE_5 NO-OI | 29    | 100,0%  | 0       | 0,0%    | 29    | 100,0%  |
| _DBP OI                    | 36    | 100,0%  | 0       | 0,0%    | 36    | 100,0%  |
| RCMFE_PHASE3_SCALE_1 NO-OI | 29    | 100,0%  | 0       | 0,0%    | 29    | 100,0%  |
| _DBP OI                    | 36    | 100,0%  | 0       | 0,0%    | 36    | 100,0%  |
| RCMFE_PHASE3_SCALE_2 NO-OI | 29    | 100,0%  | 0       | 0,0%    | 29    | 100,0%  |
| _DBP OI                    | 36    | 100,0%  | 0       | 0,0%    | 36    | 100,0%  |
| RCMFE_PHASE3_SCALE_3 NO-OI | 29    | 100,0%  | 0       | 0,0%    | 29    | 100,0%  |
| _DBP OI                    | 36    | 100,0%  | 0       | 0,0%    | 36    | 100,0%  |
| RCMFE_PHASE3_SCALE_4 NO-OI | 29    | 100,0%  | 0       | 0,0%    | 29    | 100,0%  |
| _DBP OI                    | 36    | 100,0%  | 0       | 0,0%    | 36    | 100,0%  |
| RCMFE_PHASE3_SCALE_5 NO-OI | 29    | 100,0%  | 0       | 0,0%    | 29    | 100,0%  |
| _DBP OI                    | 36    | 100,0%  | 0       | 0,0%    | 36    | 100,0%  |
| RCMFE_PHASE4_SCALE_1 NO-OI | 29    | 100,0%  | 0       | 0,0%    | 29    | 100,0%  |
| _DBP OI                    | 36    | 100,0%  | 0       | 0,0%    | 36    | 100,0%  |
| RCMFE_PHASE4_SCALE_2 NO-OI | 29    | 100,0%  | 0       | 0,0%    | 29    | 100,0%  |
| _DBP OI                    | 36    | 100,0%  | 0       | 0,0%    | 36    | 100,0%  |
| RCMFE_PHASE4_SCALE_3 NO-OI | 29    | 100,0%  | 0       | 0,0%    | 29    | 100,0%  |
| _DBP OI                    | 36    | 100,0%  | 0       | 0,0%    | 36    | 100,0%  |
| RCMFE_PHASE4_SCALE_4 NO-OI | 29    | 100,0%  | 0       | 0,0%    | 29    | 100,0%  |
| _DBP OI                    | 36    | 100,0%  | 0       | 0,0%    | 36    | 100,0%  |
| RCMFE_PHASE4_SCALE_5 NO-OI | 29    | 100,0%  | 0       | 0,0%    | 29    | 100,0%  |
| _DBP OI                    | 36    | 100,0%  | 0       | 0,0%    | 36    | 100,0%  |
| RCMFE_PHASE5_SCALE_1 NO-OI | 29    | 100,0%  | 0       | 0,0%    | 29    | 100,0%  |
| _DBP                       |       |         |         |         |       |         |

### Case Processing Summary

| PATHOLOGY            |       | Cases |         |         |         |       |         |
|----------------------|-------|-------|---------|---------|---------|-------|---------|
|                      |       | Valid |         | Missing |         | Total |         |
|                      |       | N     | Percent | N       | Percent | N     | Percent |
| RCMFE_PHASE5_SCALE_1 | OI    | 36    | 100,0%  | 0       | 0,0%    | 36    | 100,0%  |
| _DBP                 |       |       |         |         |         |       |         |
| RCMFE_PHASE5_SCALE_2 | NO-OI | 29    | 100,0%  | 0       | 0,0%    | 29    | 100,0%  |
| _DBP                 | OI    | 36    | 100,0%  | 0       | 0,0%    | 36    | 100,0%  |
| RCMFE_PHASE5_SCALE_3 | NO-OI | 29    | 100,0%  | 0       | 0,0%    | 29    | 100,0%  |
| _DBP                 | OI    | 36    | 100,0%  | 0       | 0,0%    | 36    | 100,0%  |
| RCMFE_PHASE5_SCALE_4 | NO-OI | 29    | 100,0%  | 0       | 0,0%    | 29    | 100,0%  |
| _DBP                 | OI    | 36    | 100,0%  | 0       | 0,0%    | 36    | 100,0%  |
| RCMFE_PHASE5_SCALE_5 | NO-OI | 29    | 100,0%  | 0       | 0,0%    | 29    | 100,0%  |
| _DBP                 | OI    | 36    | 100,0%  | 0       | 0,0%    | 36    | 100,0%  |

### Tests of Normality

| PATHOLOGY            |       | Kolmogorov-Smirnov <sup>a</sup> |    |       | Shapiro-Wilk |    |      |
|----------------------|-------|---------------------------------|----|-------|--------------|----|------|
|                      |       | Statistic                       | df | Sig.  | Statistic    | df | Sig. |
| RCMFE_PHASE1_SCALE_1 | NO-OI | ,143                            | 29 | ,136  | ,945         | 29 | ,137 |
| _DBP                 | OI    | ,072                            | 36 | ,200* | ,987         | 36 | ,945 |
| RCMFE_PHASE1_SCALE_2 | NO-OI | ,123                            | 29 | ,200* | ,967         | 29 | ,477 |
| _DBP                 | OI    | ,115                            | 36 | ,200* | ,974         | 36 | ,557 |
| RCMFE_PHASE1_SCALE_3 | NO-OI | ,144                            | 29 | ,128  | ,949         | 29 | ,173 |
| _DBP                 | OI    | ,132                            | 36 | ,115  | ,979         | 36 | ,717 |
| RCMFE_PHASE1_SCALE_4 | NO-OI | ,125                            | 29 | ,200* | ,955         | 29 | ,249 |
| _DBP                 | OI    | ,130                            | 36 | ,132  | ,948         | 36 | ,088 |
| RCMFE_PHASE1_SCALE_5 | NO-OI | ,100                            | 29 | ,200* | ,971         | 29 | ,588 |
| _DBP                 | OI    | ,130                            | 36 | ,126  | ,951         | 36 | ,113 |
| RCMFE_PHASE2_SCALE_1 | NO-OI | ,137                            | 29 | ,171  | ,961         | 29 | ,339 |
| _DBP                 | OI    | ,096                            | 36 | ,200* | ,972         | 36 | ,477 |
| RCMFE_PHASE2_SCALE_2 | NO-OI | ,124                            | 29 | ,200* | ,937         | 29 | ,085 |
| _DBP                 | OI    | ,098                            | 36 | ,200* | ,965         | 36 | ,306 |
| RCMFE_PHASE2_SCALE_3 | NO-OI | ,113                            | 29 | ,200* | ,965         | 29 | ,431 |
| _DBP                 | OI    | ,068                            | 36 | ,200* | ,983         | 36 | ,855 |
| RCMFE_PHASE2_SCALE_4 | NO-OI | ,123                            | 29 | ,200* | ,965         | 29 | ,433 |
| _DBP                 | OI    | ,087                            | 36 | ,200* | ,976         | 36 | ,595 |
| RCMFE_PHASE2_SCALE_5 | NO-OI | ,132                            | 29 | ,200* | ,951         | 29 | ,191 |
| _DBP                 | OI    | ,083                            | 36 | ,200* | ,981         | 36 | ,781 |
| RCMFE_PHASE3_SCALE_1 | NO-OI | ,104                            | 29 | ,200* | ,971         | 29 | ,599 |
| _DBP                 | OI    | ,156                            | 36 | ,028  | ,952         | 36 | ,118 |
| RCMFE_PHASE3_SCALE_2 | NO-OI | ,159                            | 29 | ,060  | ,952         | 29 | ,207 |
| _DBP                 | OI    | ,073                            | 36 | ,200* | ,986         | 36 | ,914 |
| RCMFE_PHASE3_SCALE_3 | NO-OI | ,090                            | 29 | ,200* | ,973         | 29 | ,636 |
| _DBP                 | OI    | ,087                            | 36 | ,200* | ,978         | 36 | ,681 |
| RCMFE_PHASE3_SCALE_4 | NO-OI | ,076                            | 29 | ,200* | ,978         | 29 | ,794 |
| _DBP                 | OI    | ,072                            | 36 | ,200* | ,976         | 36 | ,620 |
| RCMFE_PHASE3_SCALE_5 | NO-OI | ,096                            | 29 | ,200* | ,957         | 29 | ,280 |

|                      |       |      |    |       |      |    |      |
|----------------------|-------|------|----|-------|------|----|------|
| _DBP                 | OI    | ,088 | 36 | ,200* | ,984 | 36 | ,865 |
| RCMFE_PHASE4_SCALE_1 | NO-OI | ,155 | 29 | ,072  | ,913 | 29 | ,021 |
| _DBP                 | OI    | ,135 | 36 | ,097  | ,961 | 36 | ,230 |
| RCMFE_PHASE4_SCALE_2 | NO-OI | ,136 | 29 | ,183  | ,933 | 29 | ,066 |
| _DBP                 | OI    | ,071 | 36 | ,200* | ,986 | 36 | ,921 |
| RCMFE_PHASE4_SCALE_3 | NO-OI | ,108 | 29 | ,200* | ,958 | 29 | ,299 |
|                      | OI    | ,073 | 36 | ,200* | ,981 | 36 | ,766 |
| RCMFE_PHASE4_SCALE_4 | NO-OI | ,077 | 29 | ,200* | ,978 | 29 | ,787 |
| _DBP                 | OI    | ,103 | 36 | ,200* | ,976 | 36 | ,608 |
| RCMFE_PHASE4_SCALE_5 | NO-OI | ,134 | 29 | ,197  | ,949 | 29 | ,173 |
| _DBP                 | OI    | ,112 | 36 | ,200* | ,978 | 36 | ,694 |
| RCMFE_PHASE5_SCALE_1 | NO-OI | ,114 | 29 | ,200* | ,973 | 29 | ,634 |
| _DBP                 | OI    | ,085 | 36 | ,200* | ,969 | 36 | ,406 |

### Tests of Normality

| PATHOLOGY                  | Kolmogorov-Smirnov <sup>a</sup> |    |       | Shapiro-Wilk |    |      |
|----------------------------|---------------------------------|----|-------|--------------|----|------|
|                            | Statistic                       | df | Sig.  | Statistic    | df | Sig. |
| RCMFE_PHASE5_SCALE_2 NO-OI | ,144                            | 29 | ,126  | ,922         | 29 | ,035 |
| _DBP OI                    | ,122                            | 36 | ,197* | ,971         | 36 | ,467 |
| RCMFE_PHASE5_SCALE_3 NO-OI | ,150                            | 29 | ,093* | ,933         | 29 | ,064 |
| _DBP OI                    | ,107                            | 36 | ,200* | ,968         | 36 | ,378 |
| RCMFE_PHASE5_SCALE_4 NO-OI | ,129                            | 29 | ,200  | ,955         | 29 | ,250 |
| _DBP OI                    | ,096                            | 36 | ,200  | ,988         | 36 | ,956 |
| RCMFE_PHASE5_SCALE_5 NO-OI | ,121                            | 29 | ,200* | ,970         | 29 | ,550 |
| _DBP OI                    | ,097                            | 36 | ,200  | ,968         | 36 | ,377 |

\*. This is a lower bound of the true significance.

a. Lilliefors Significance Correction

Normal Q-Q Plots

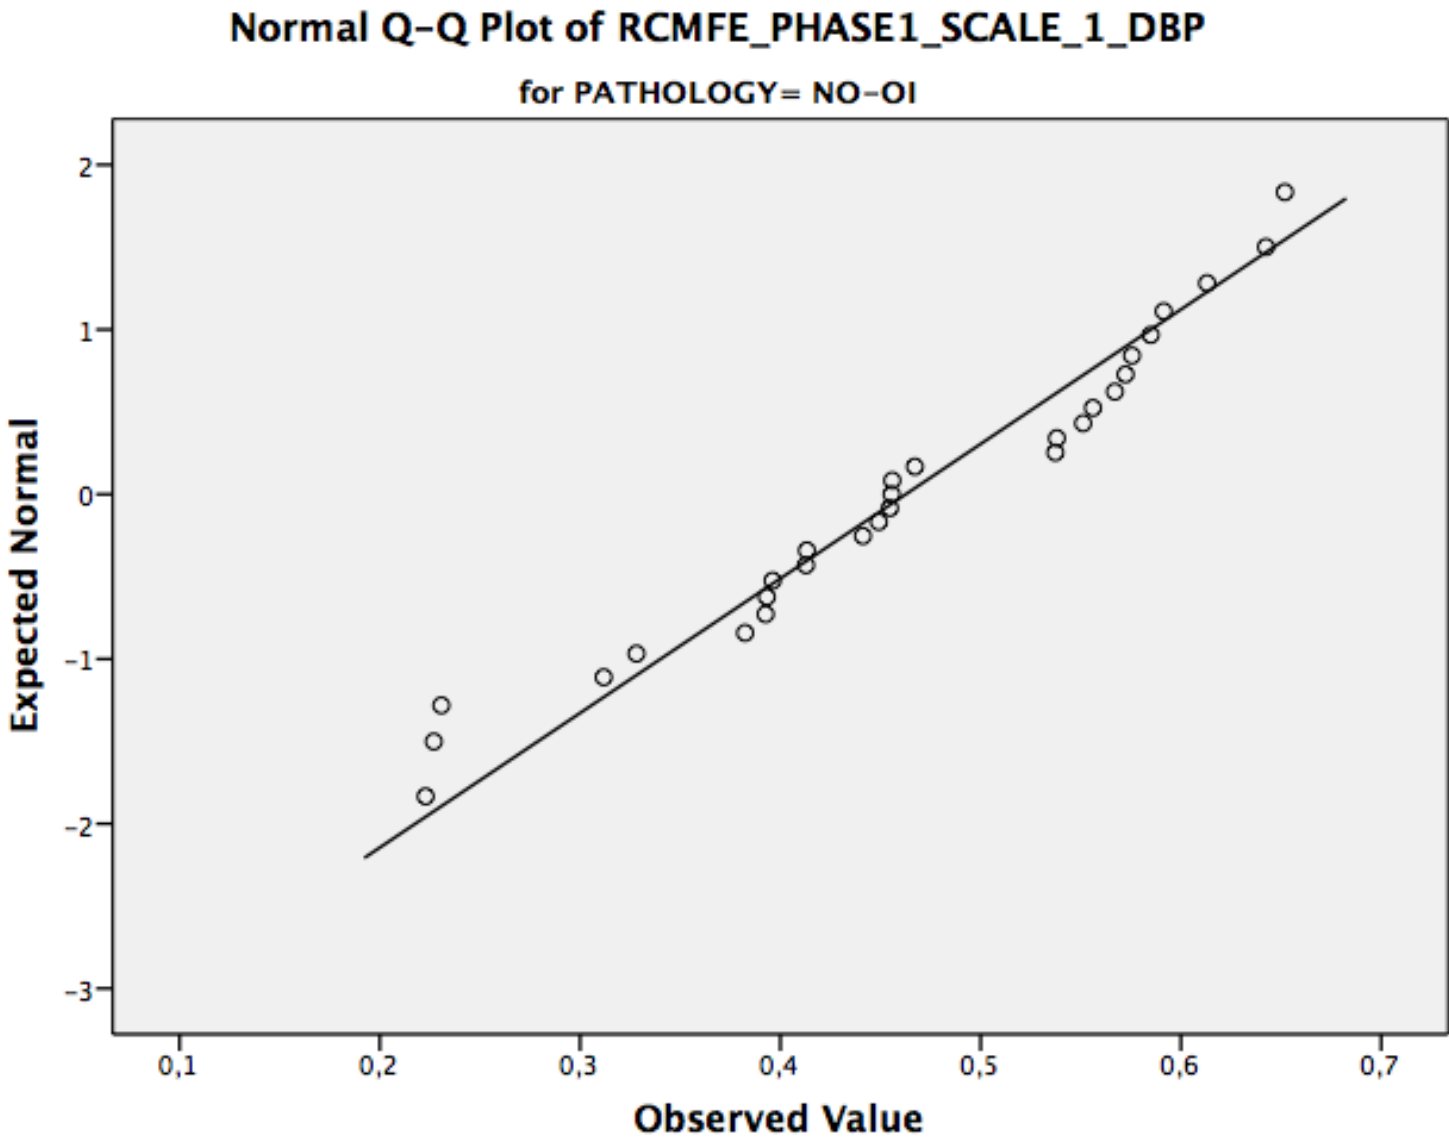

# Normal Q-Q Plot of RCMFE\_PHASE1\_SCALE\_1\_DBP

for PATHOLOGY= OI

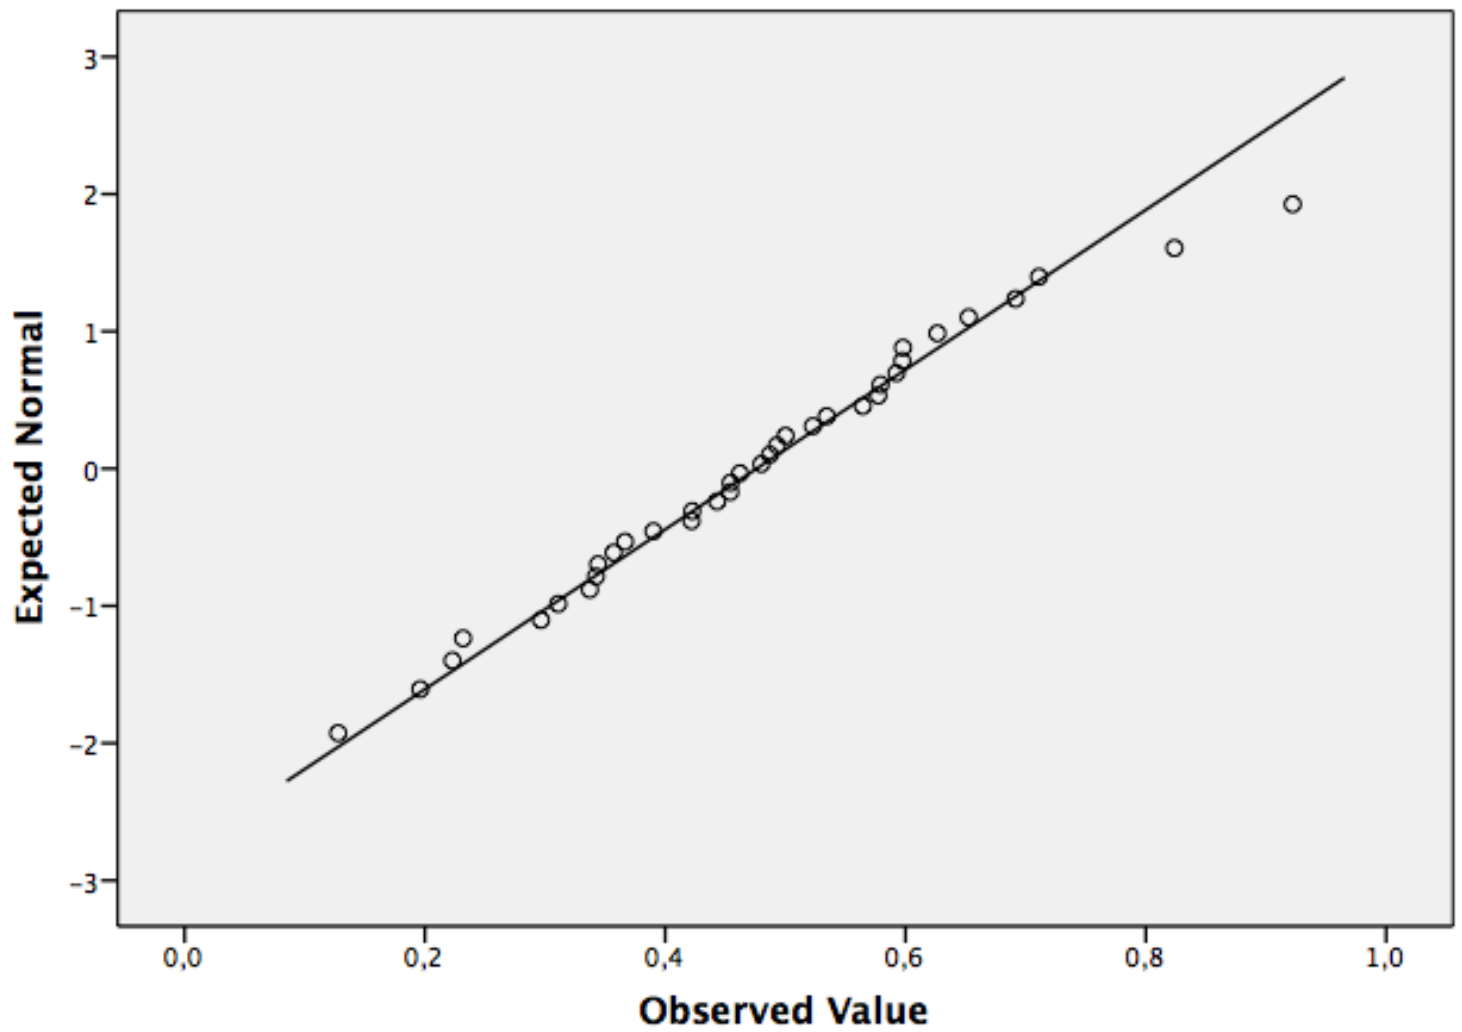



Normal Q-Q Plots

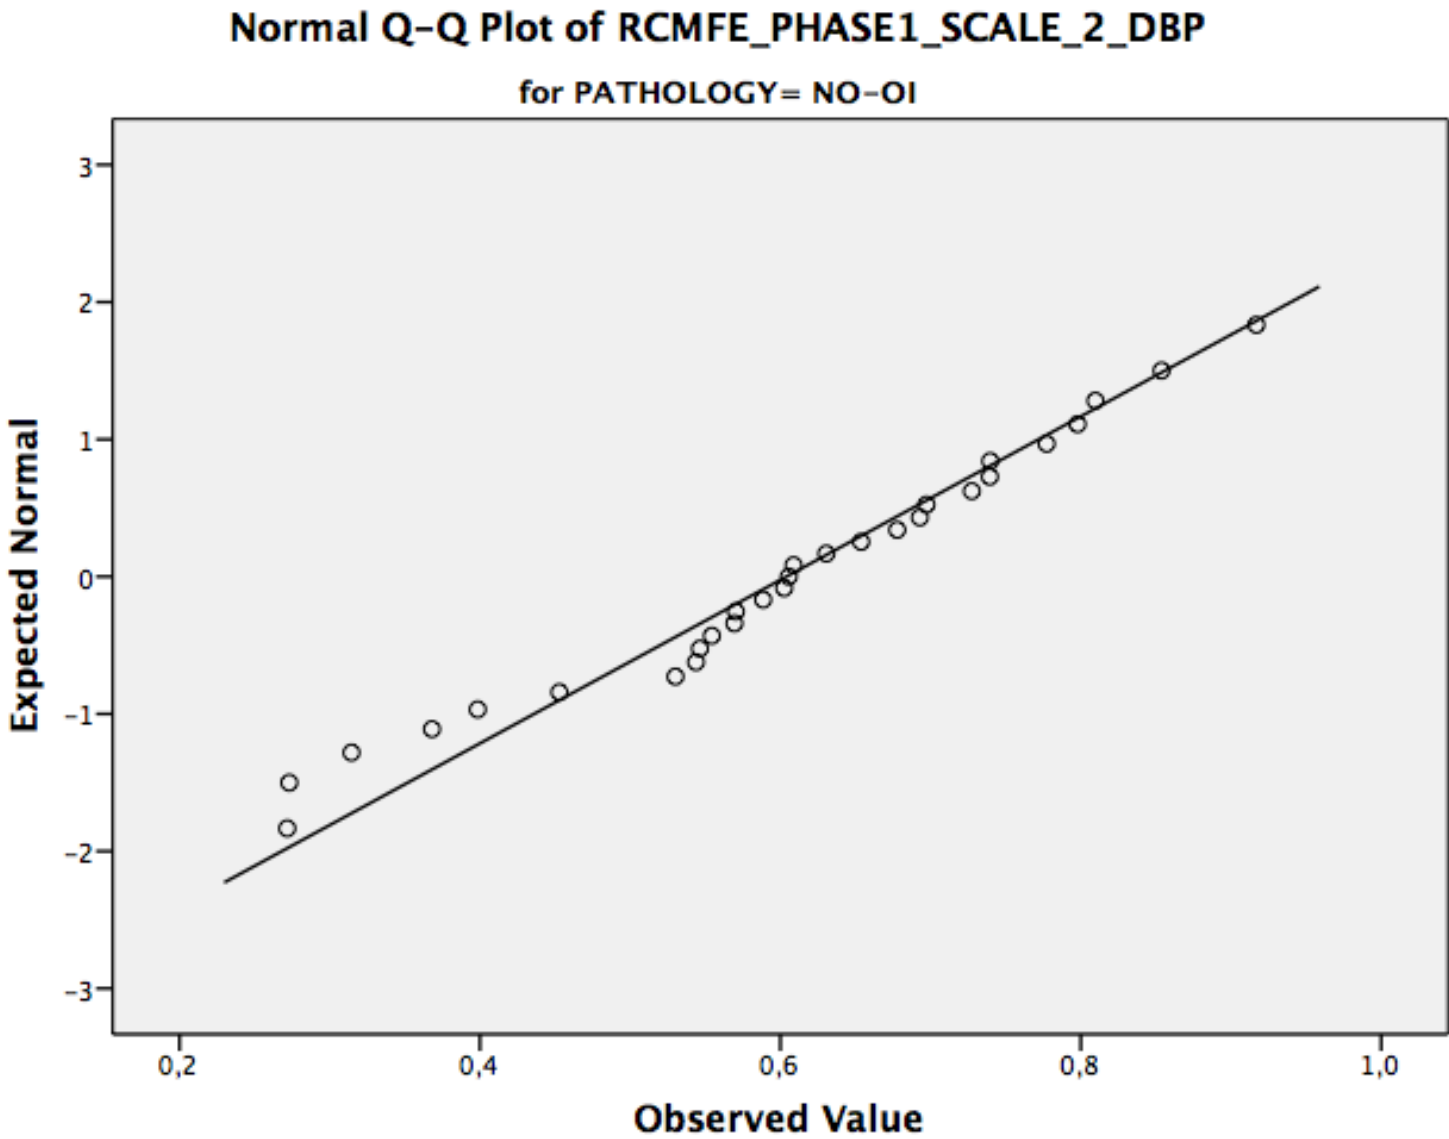

# Normal Q-Q Plot of RCMFE\_PHASE1\_SCALE\_2\_DBP

for PATHOLOGY= OI

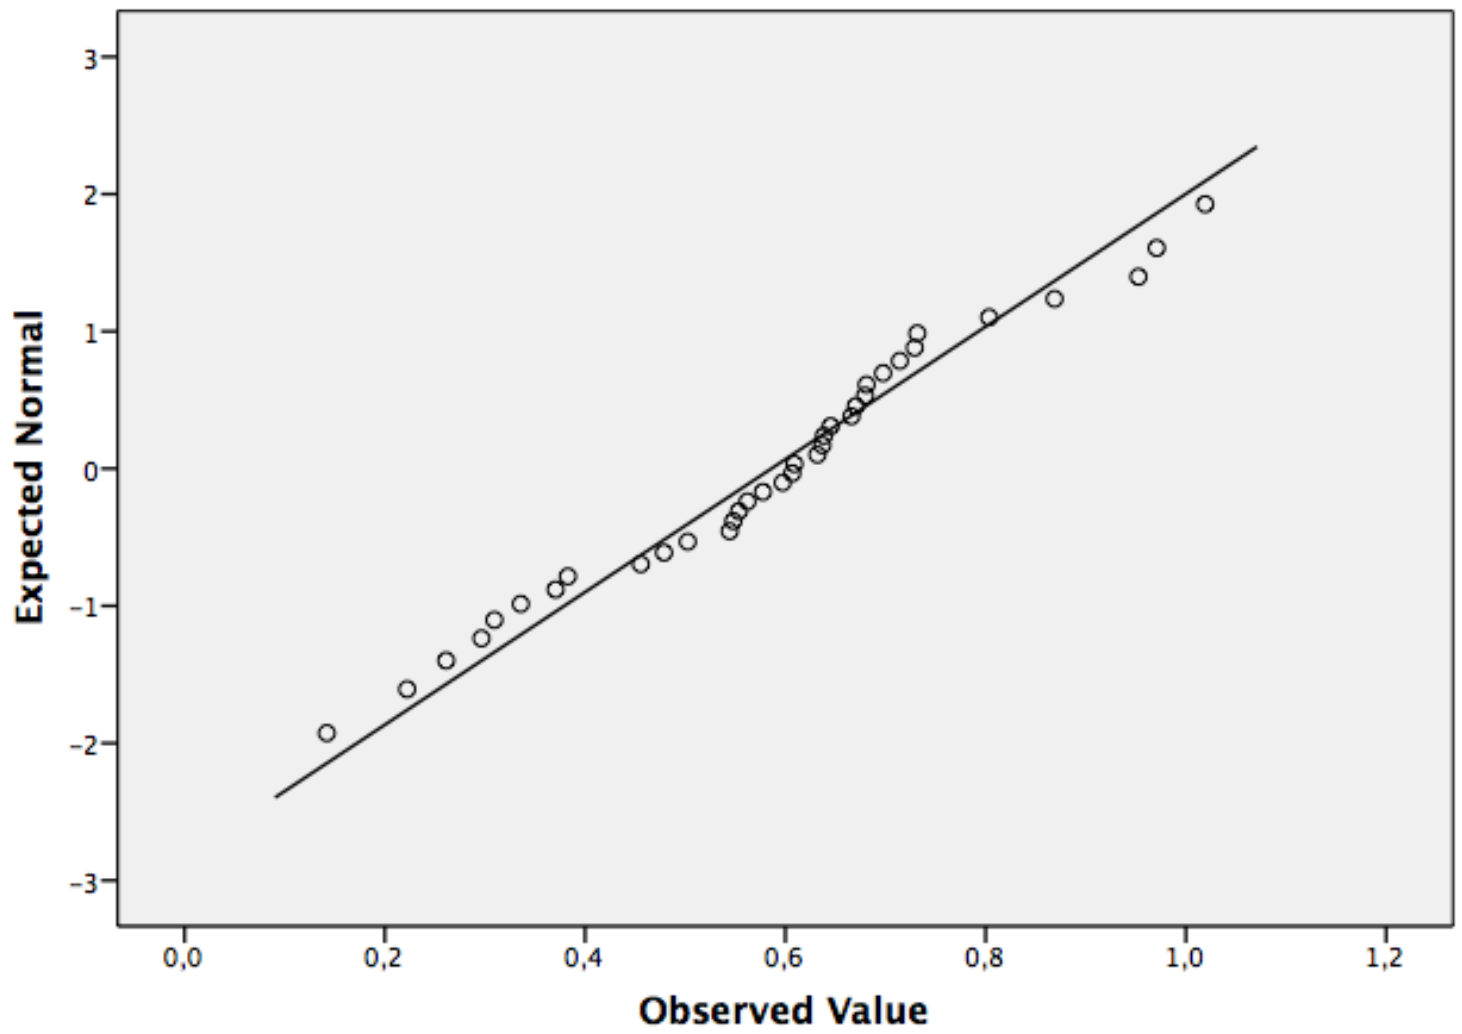

Normal Q-Q Plots

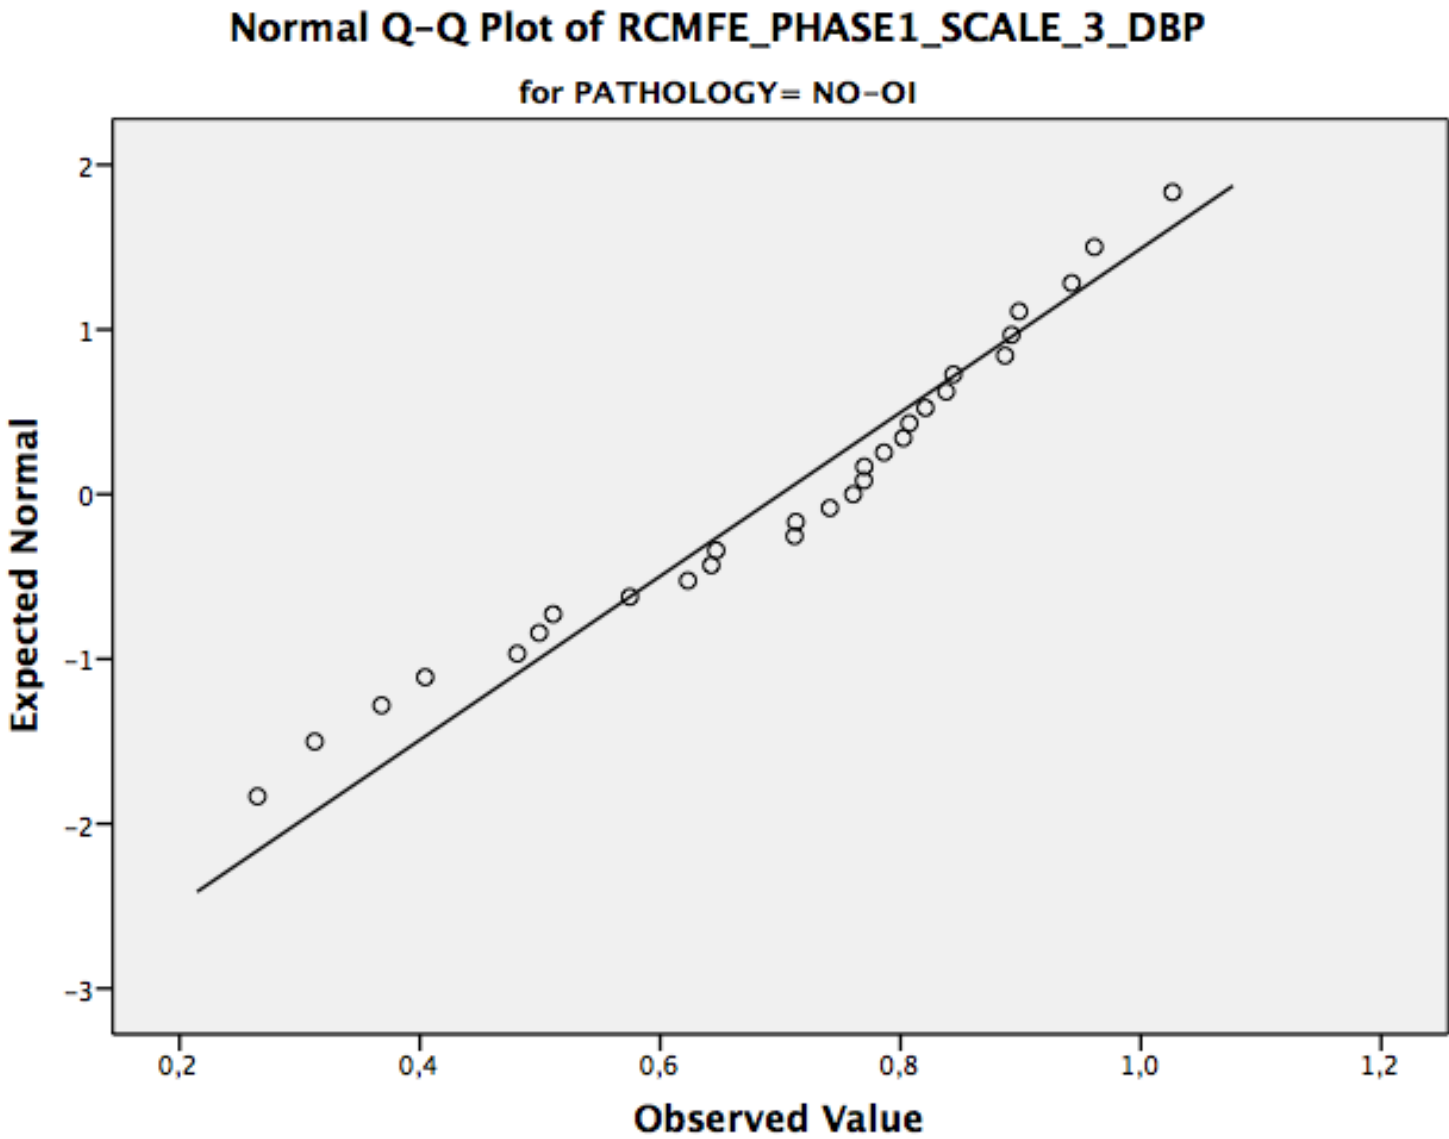

# Normal Q-Q Plot of RCMFE\_PHASE1\_SCALE\_3\_DBP

for PATHOLOGY= OI

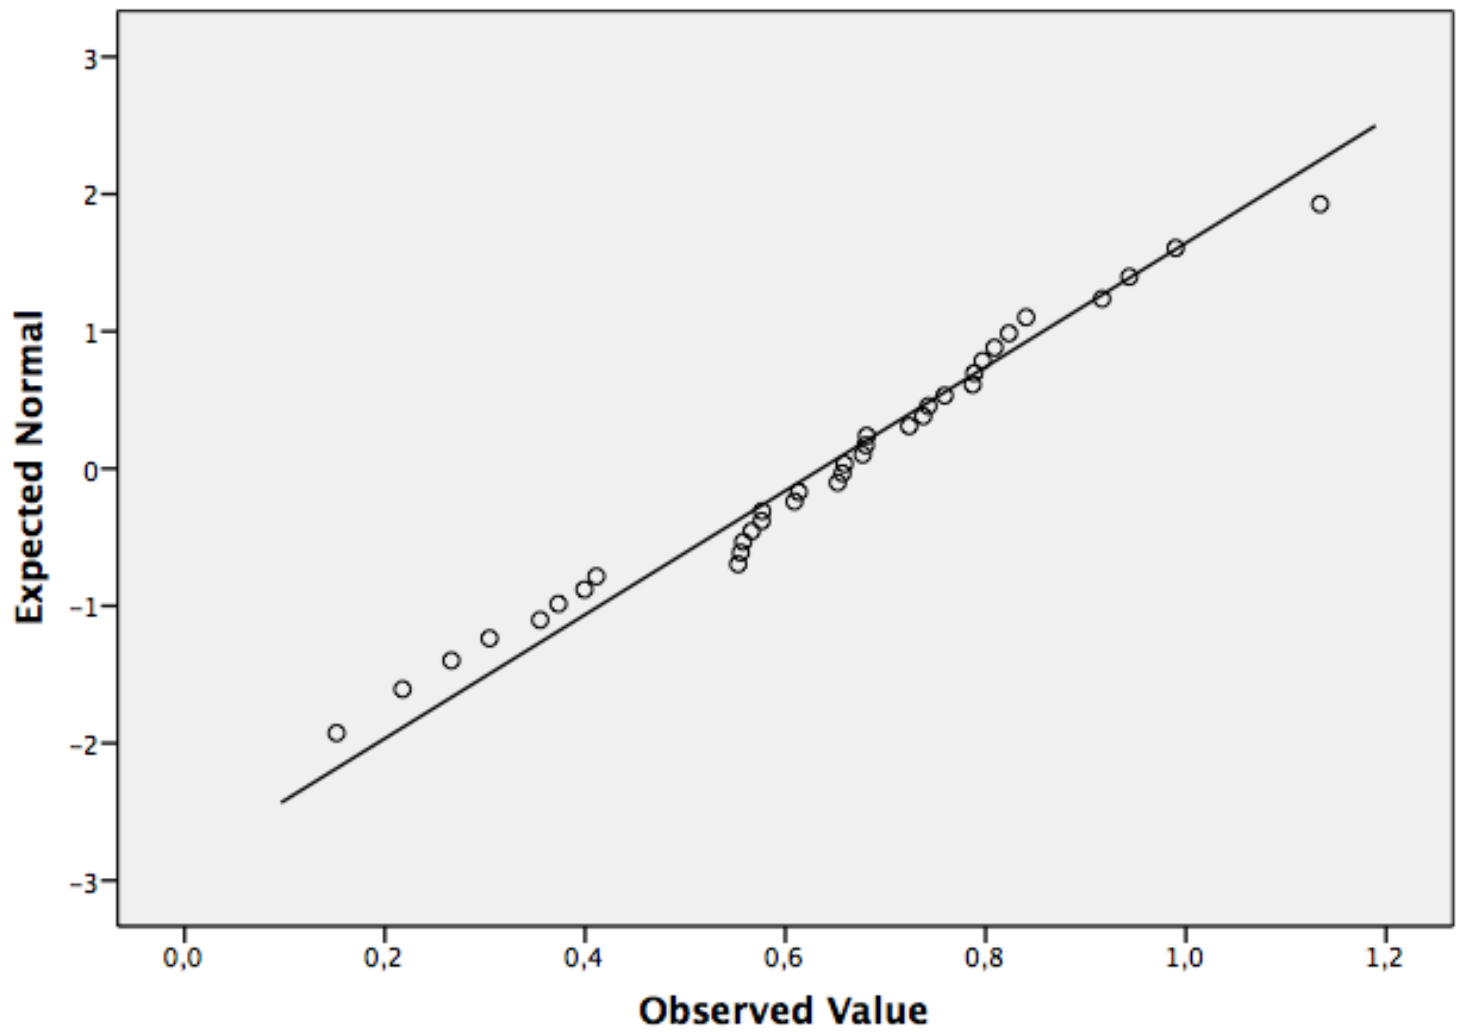

Normal Q-Q Plots

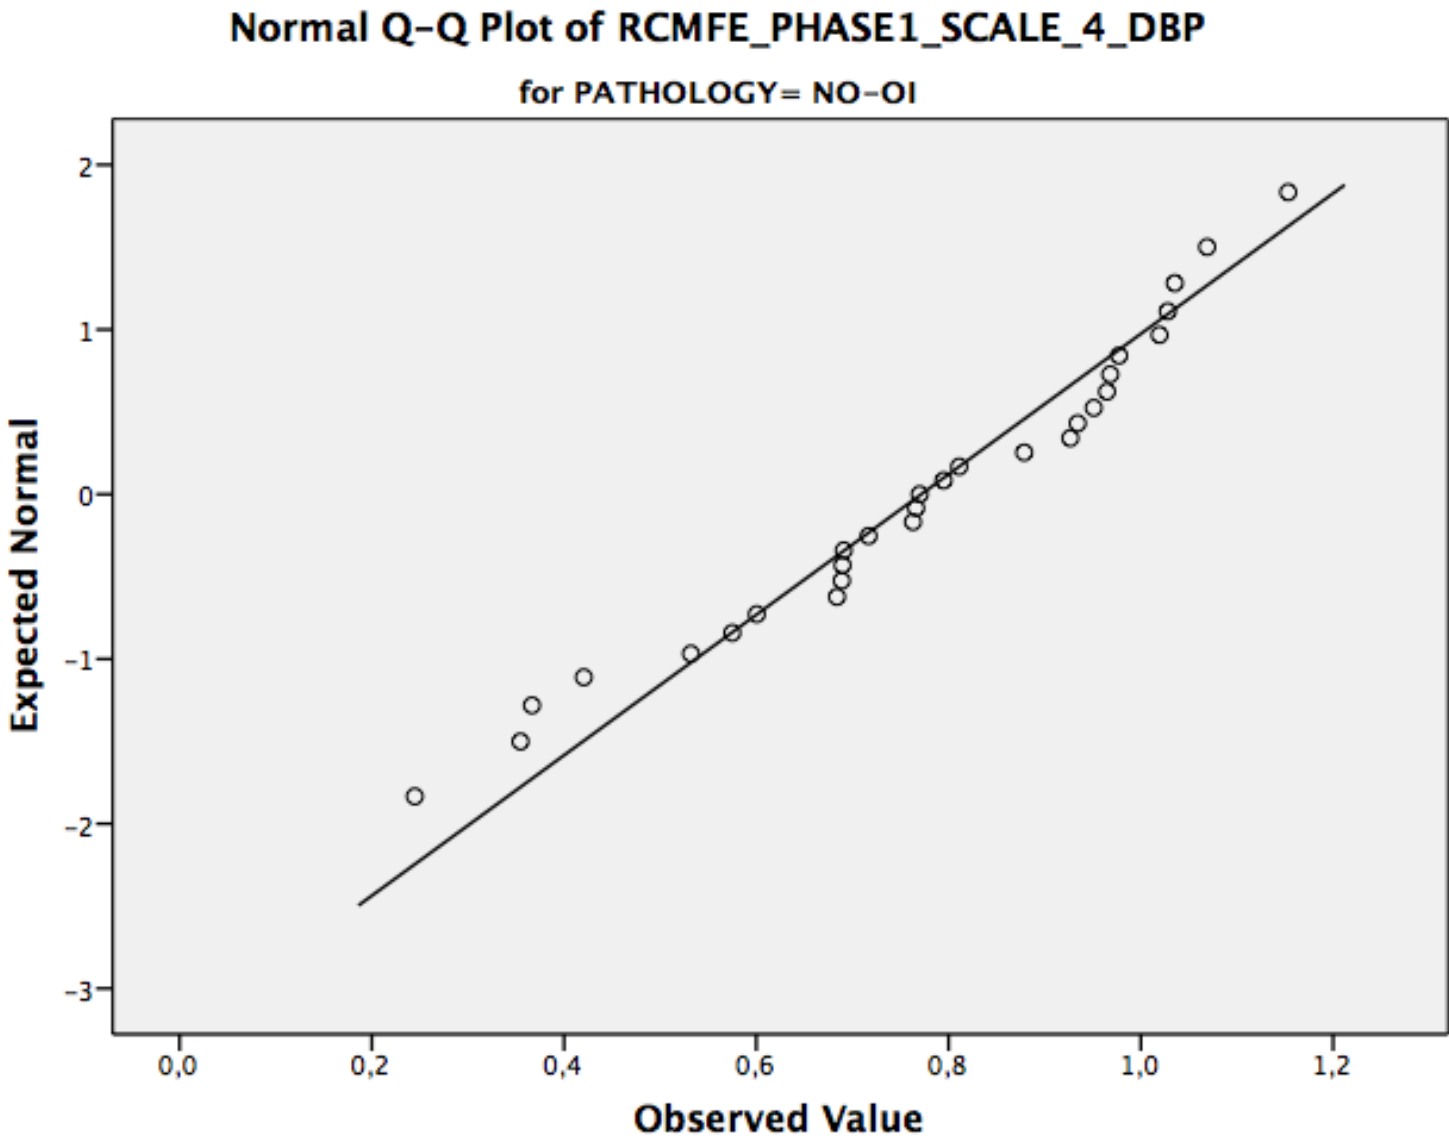

# Normal Q-Q Plot of RCMFE\_PHASE1\_SCALE\_4\_DBP

for PATHOLOGY= OI

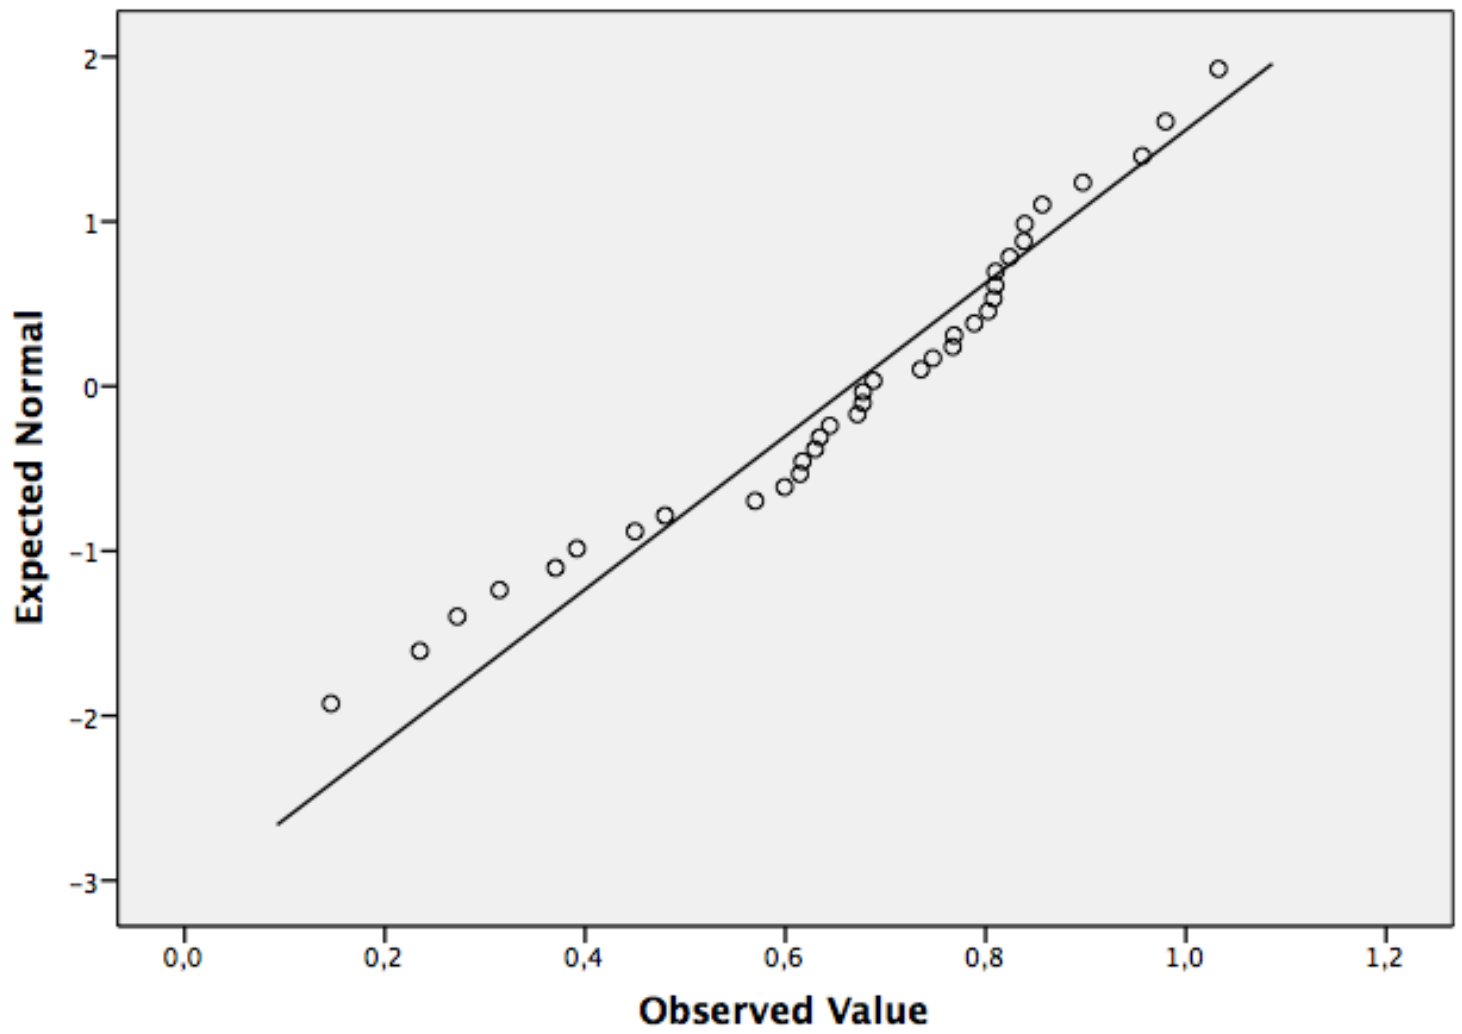

Normal Q-Q Plots

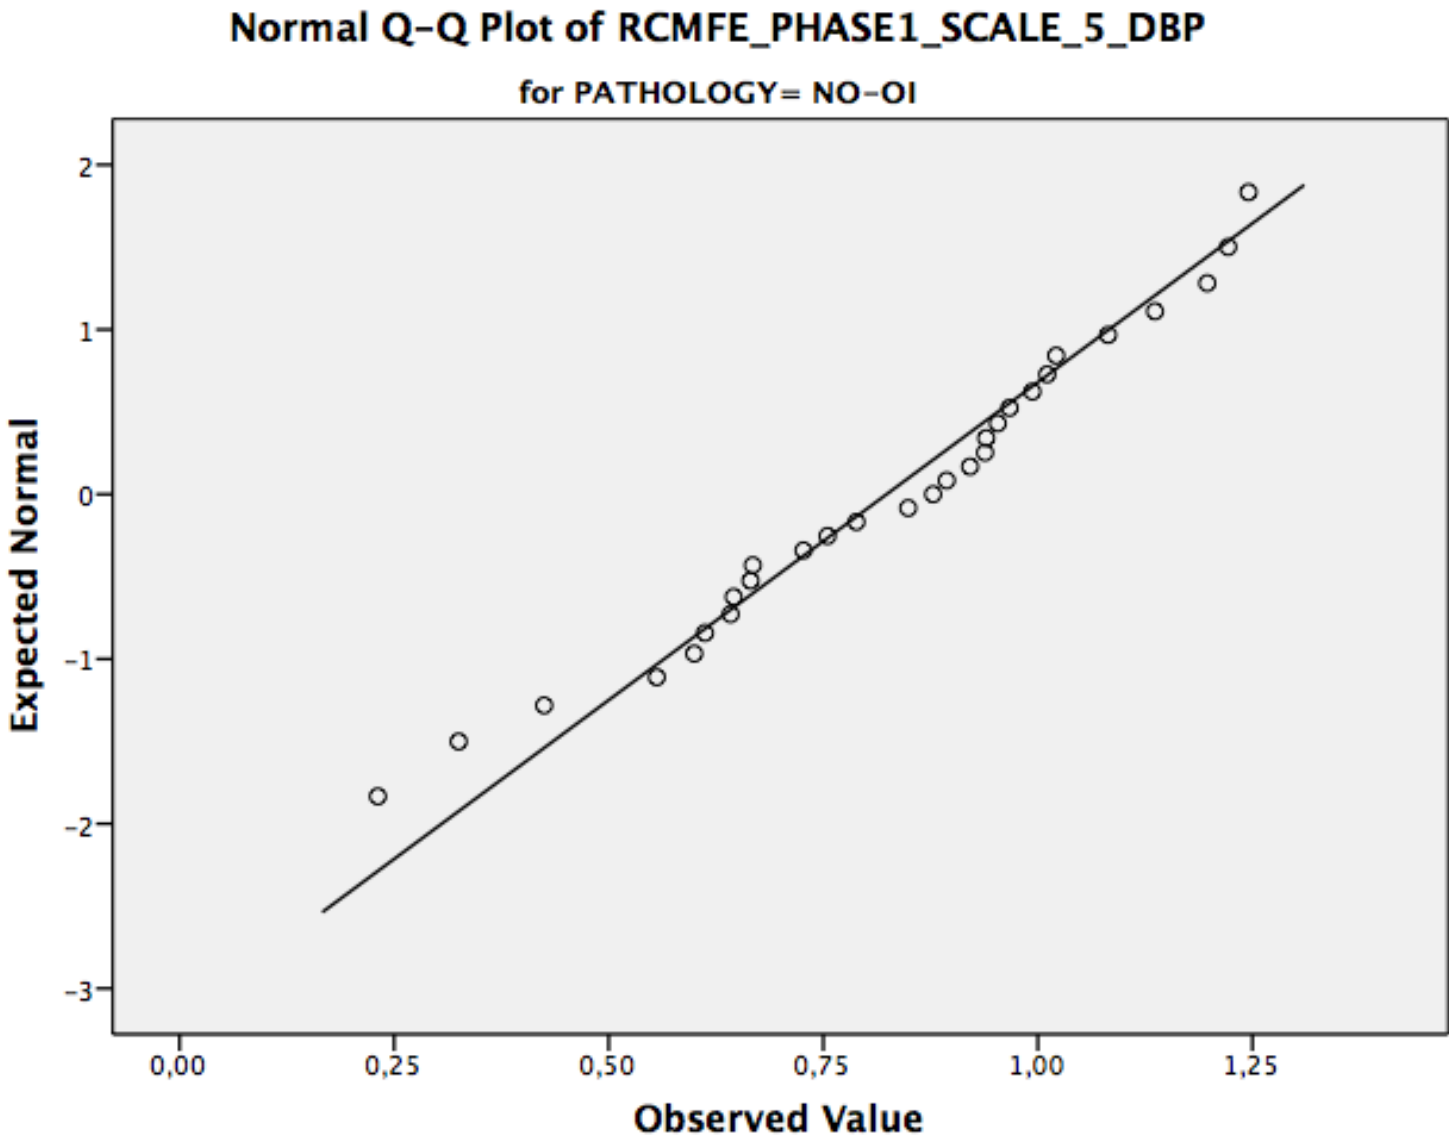

# Normal Q-Q Plot of RCMFE\_PHASE1\_SCALE\_5\_DBP

for PATHOLOGY= OI

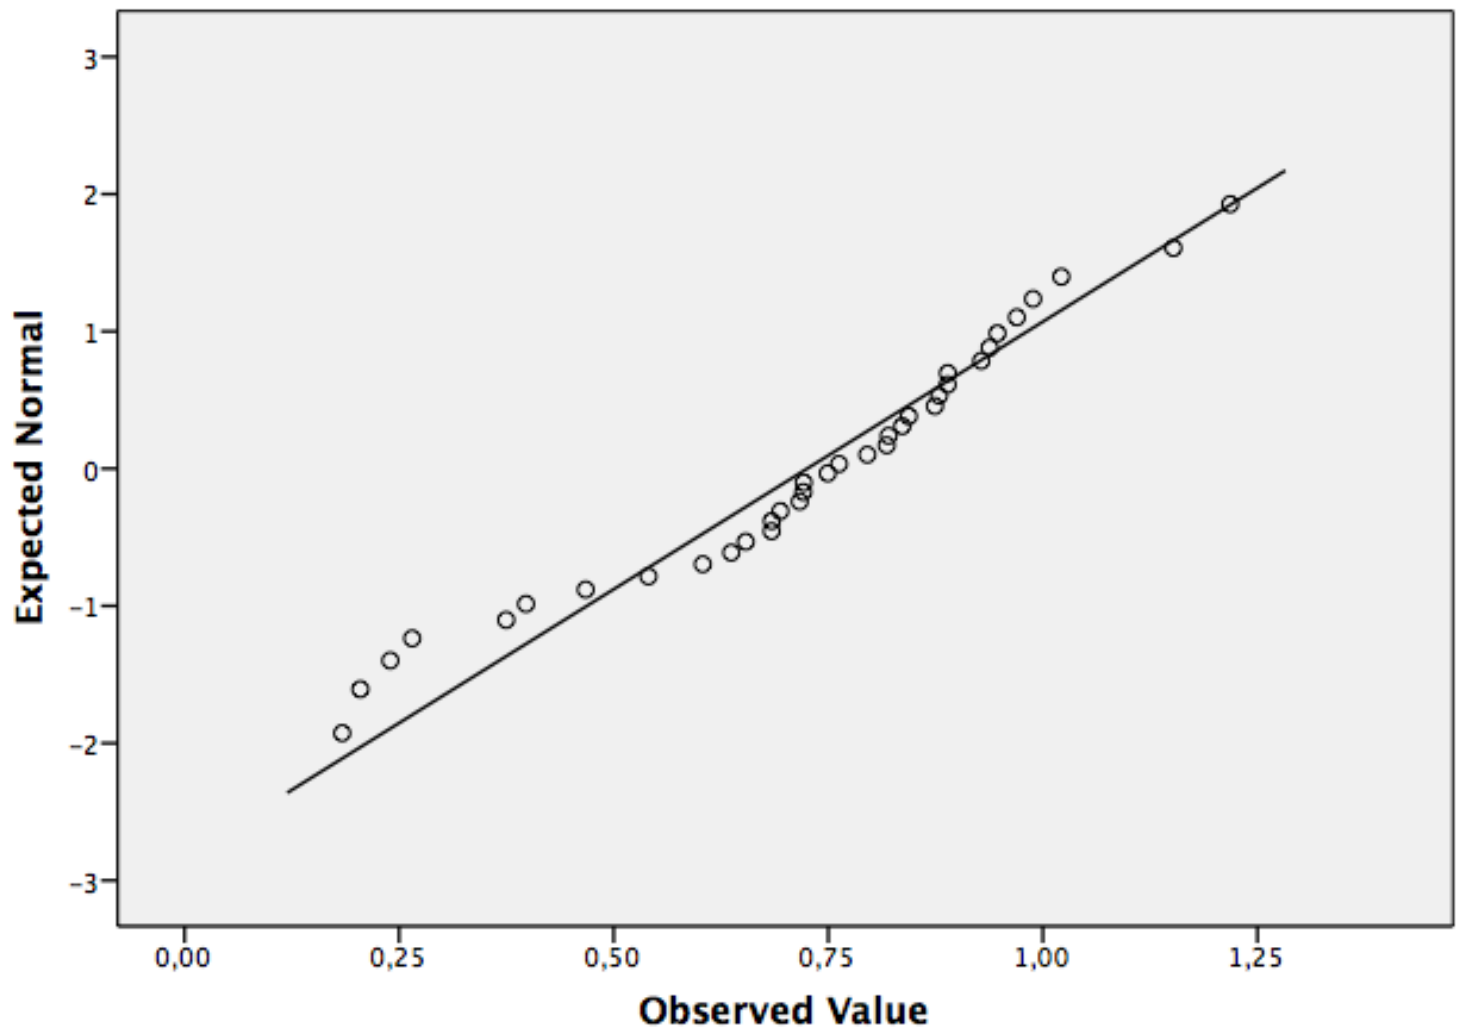



Normal Q-Q Plots

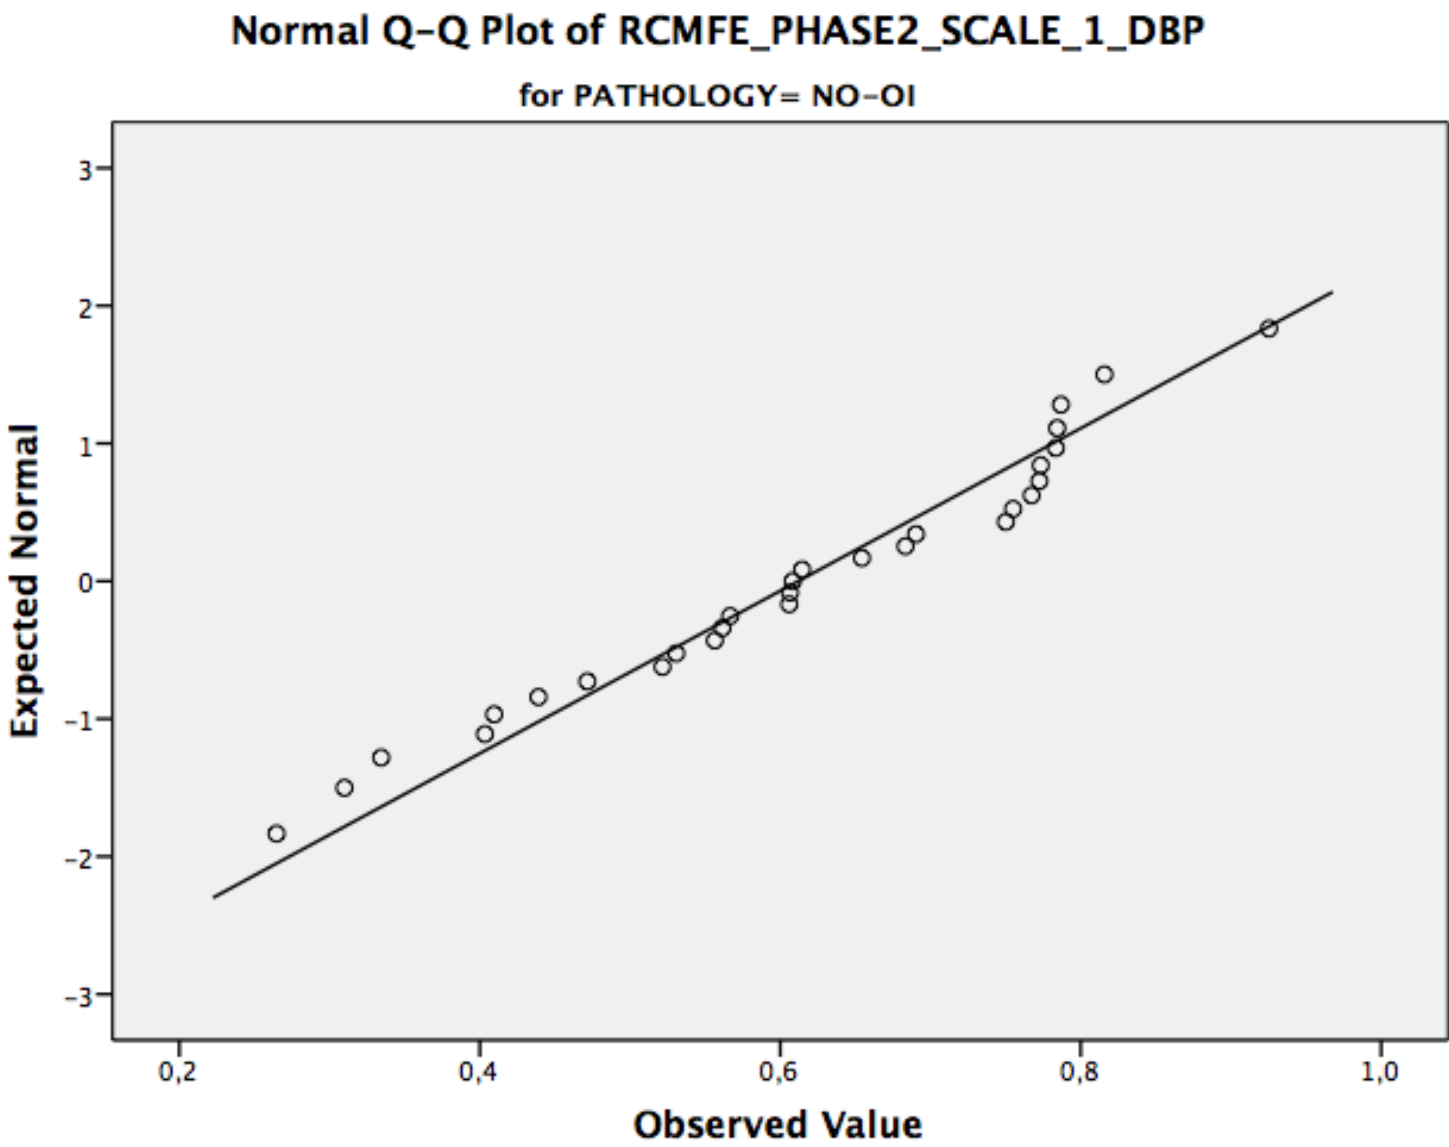

# Normal Q-Q Plot of RCMFE\_PHASE2\_SCALE\_1\_DBP

for PATHOLOGY= OI

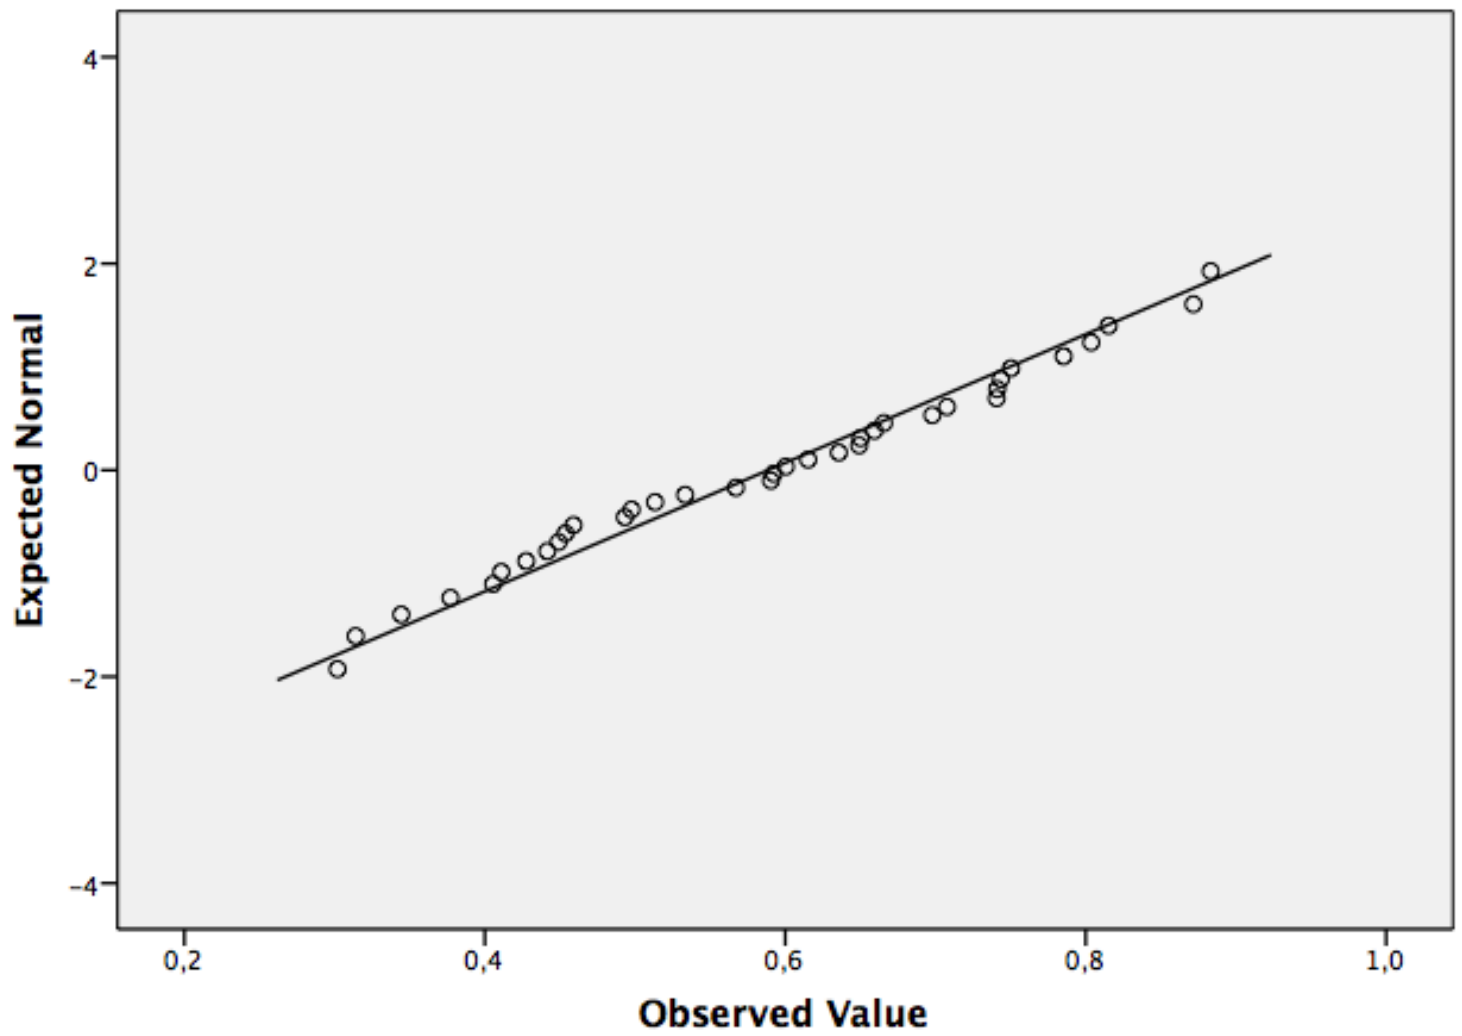

Normal Q-Q Plots

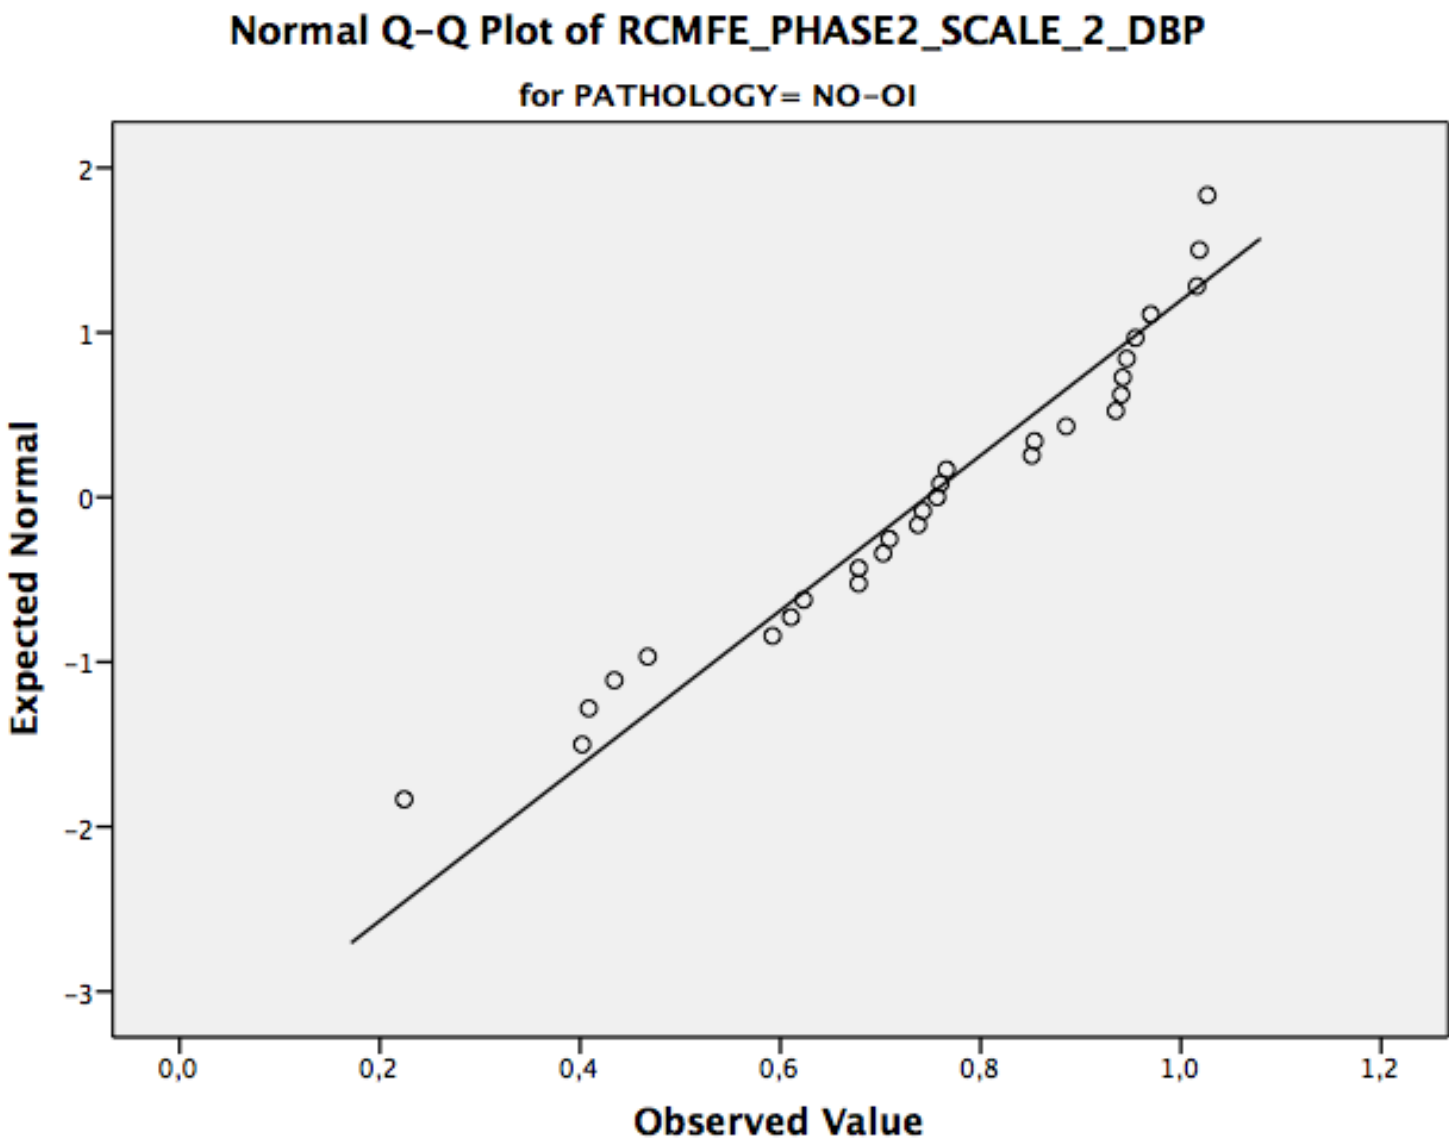

# Normal Q-Q Plot of RCMFE\_PHASE2\_SCALE\_2\_DBP

for PATHOLOGY= OI

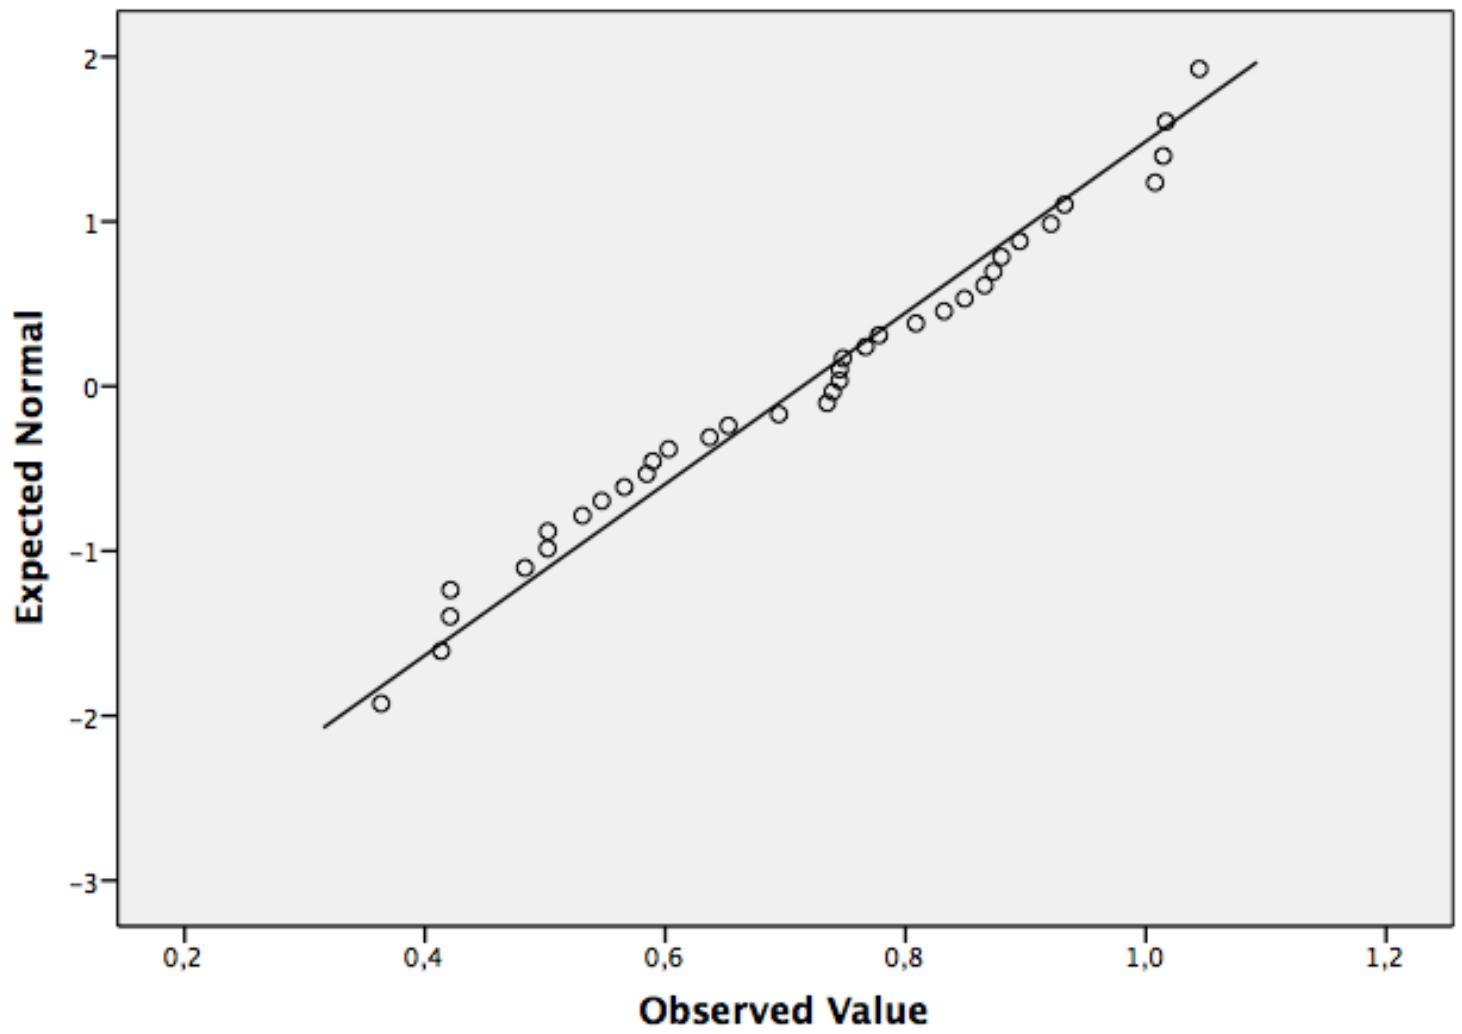

Normal Q-Q Plots

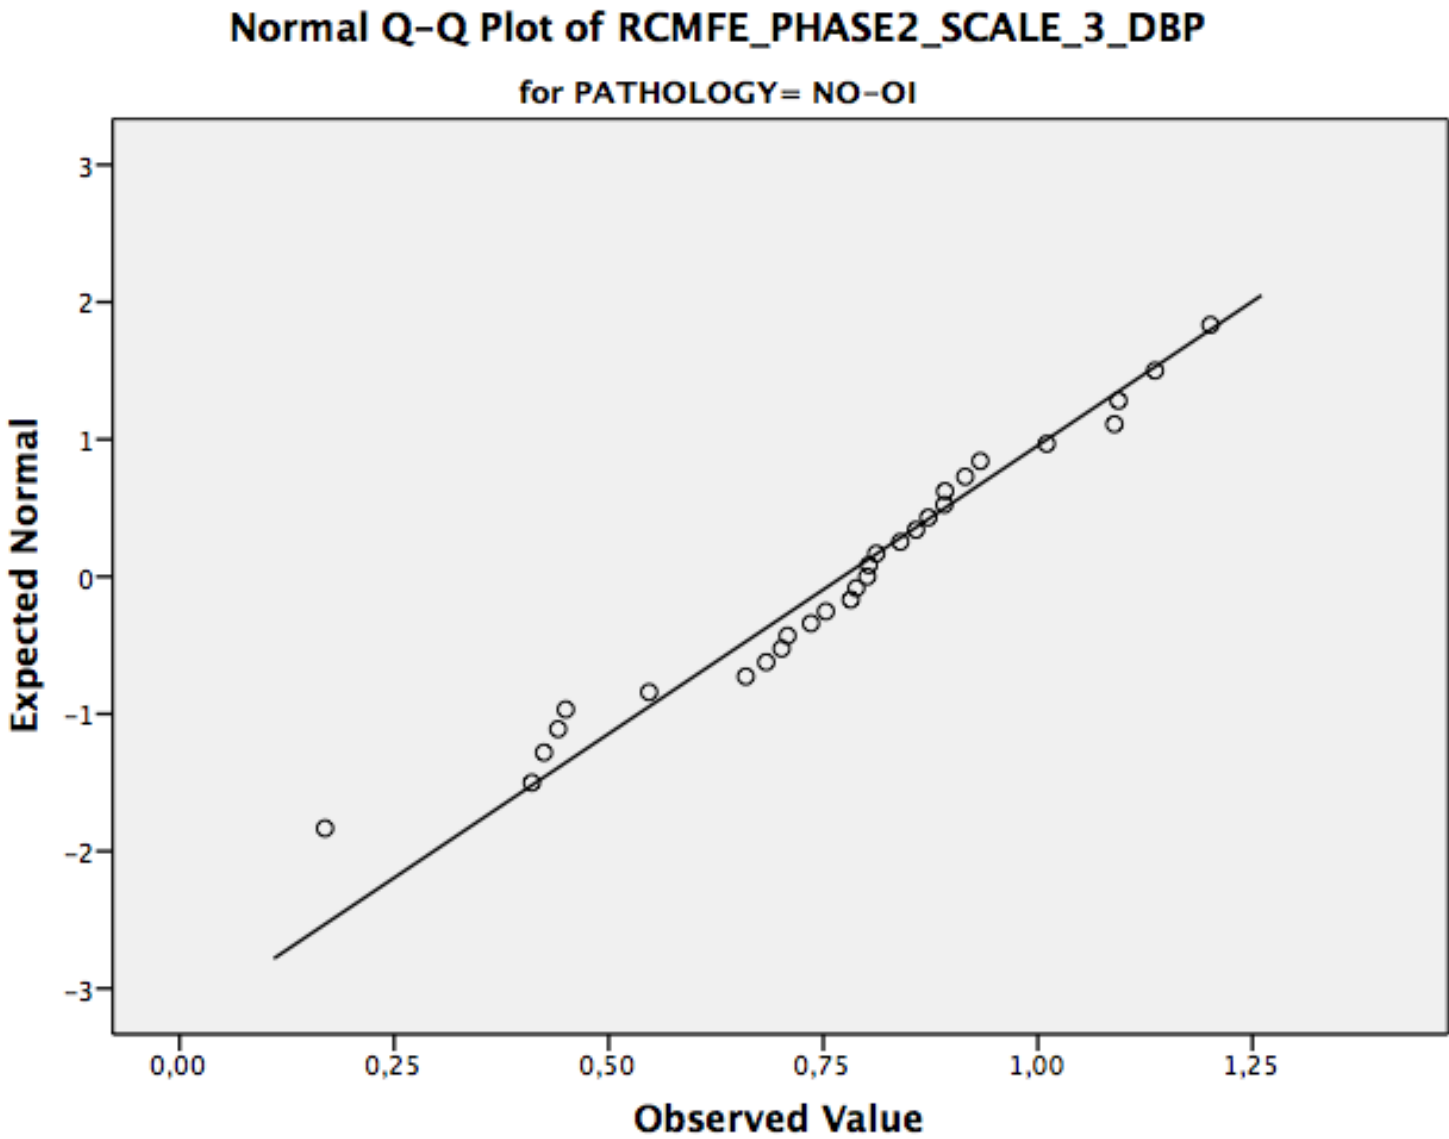

# Normal Q-Q Plot of RCMFE\_PHASE2\_SCALE\_3\_DBP

for PATHOLOGY= OI

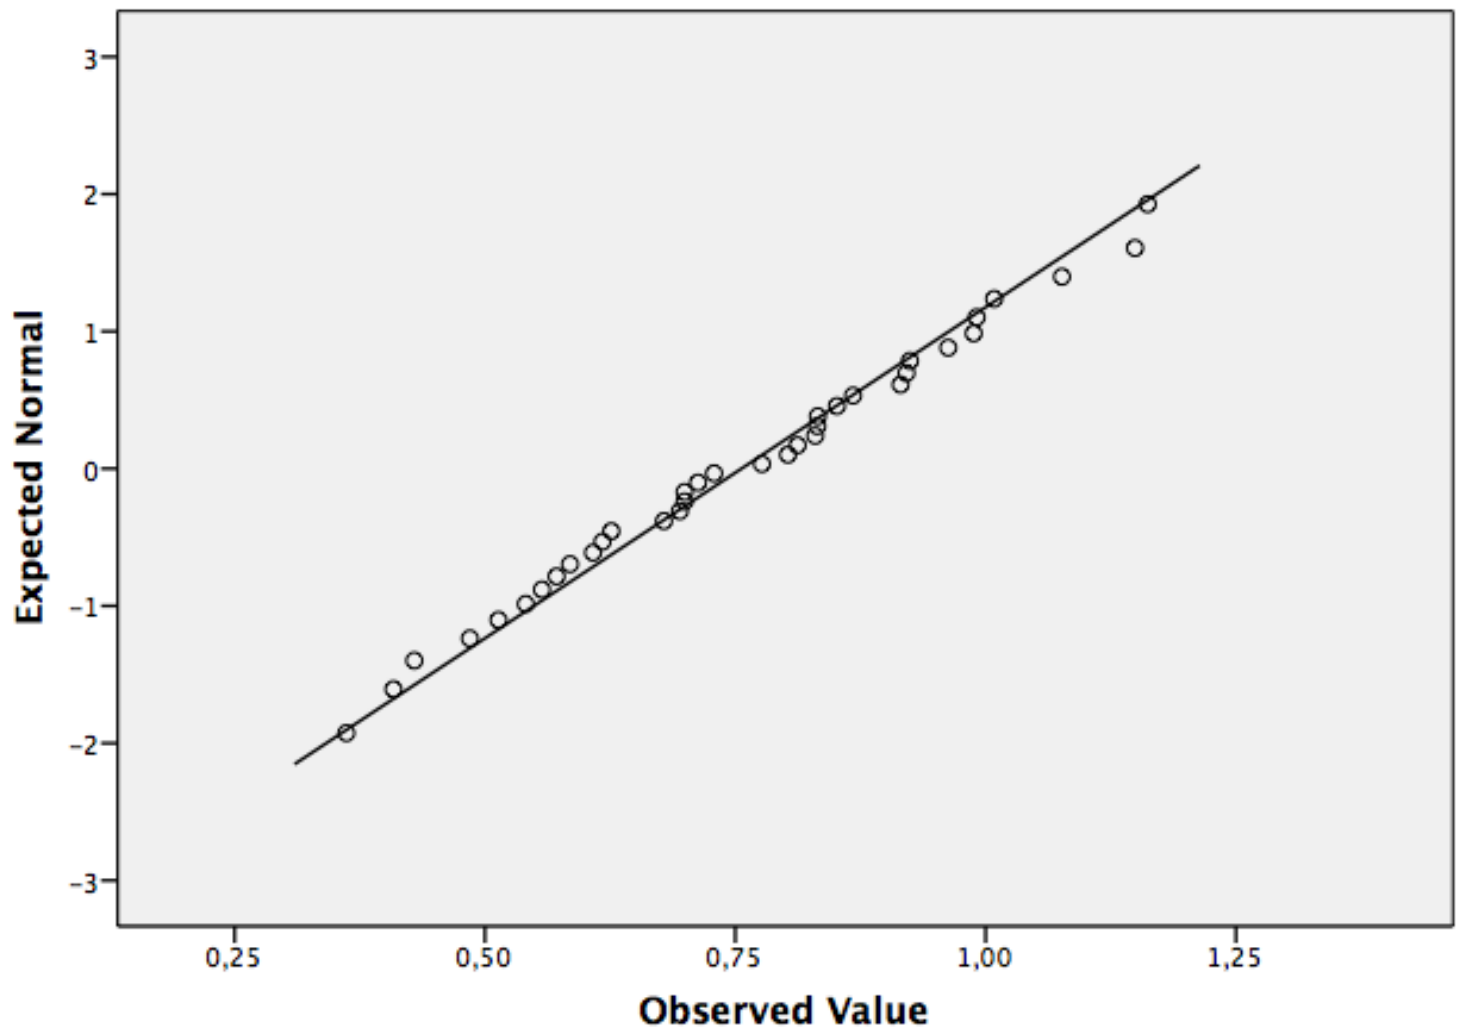

Normal Q-Q Plots

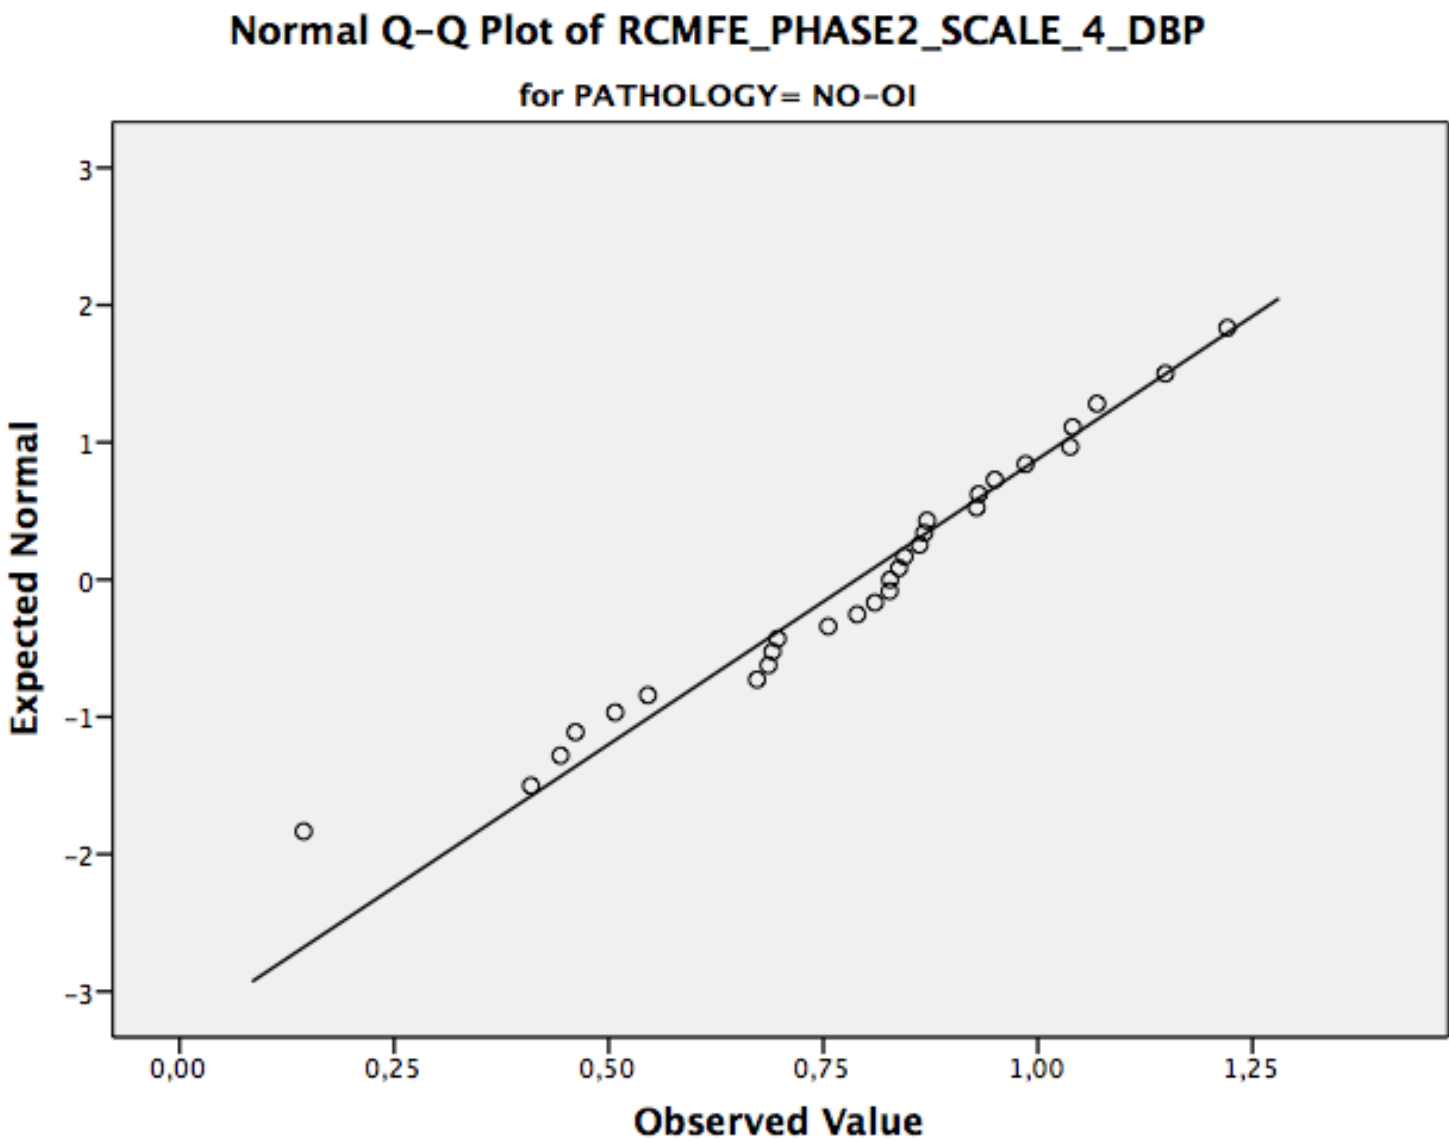

# Normal Q-Q Plot of RCMFE\_PHASE2\_SCALE\_4\_DBP

for PATHOLOGY= OI

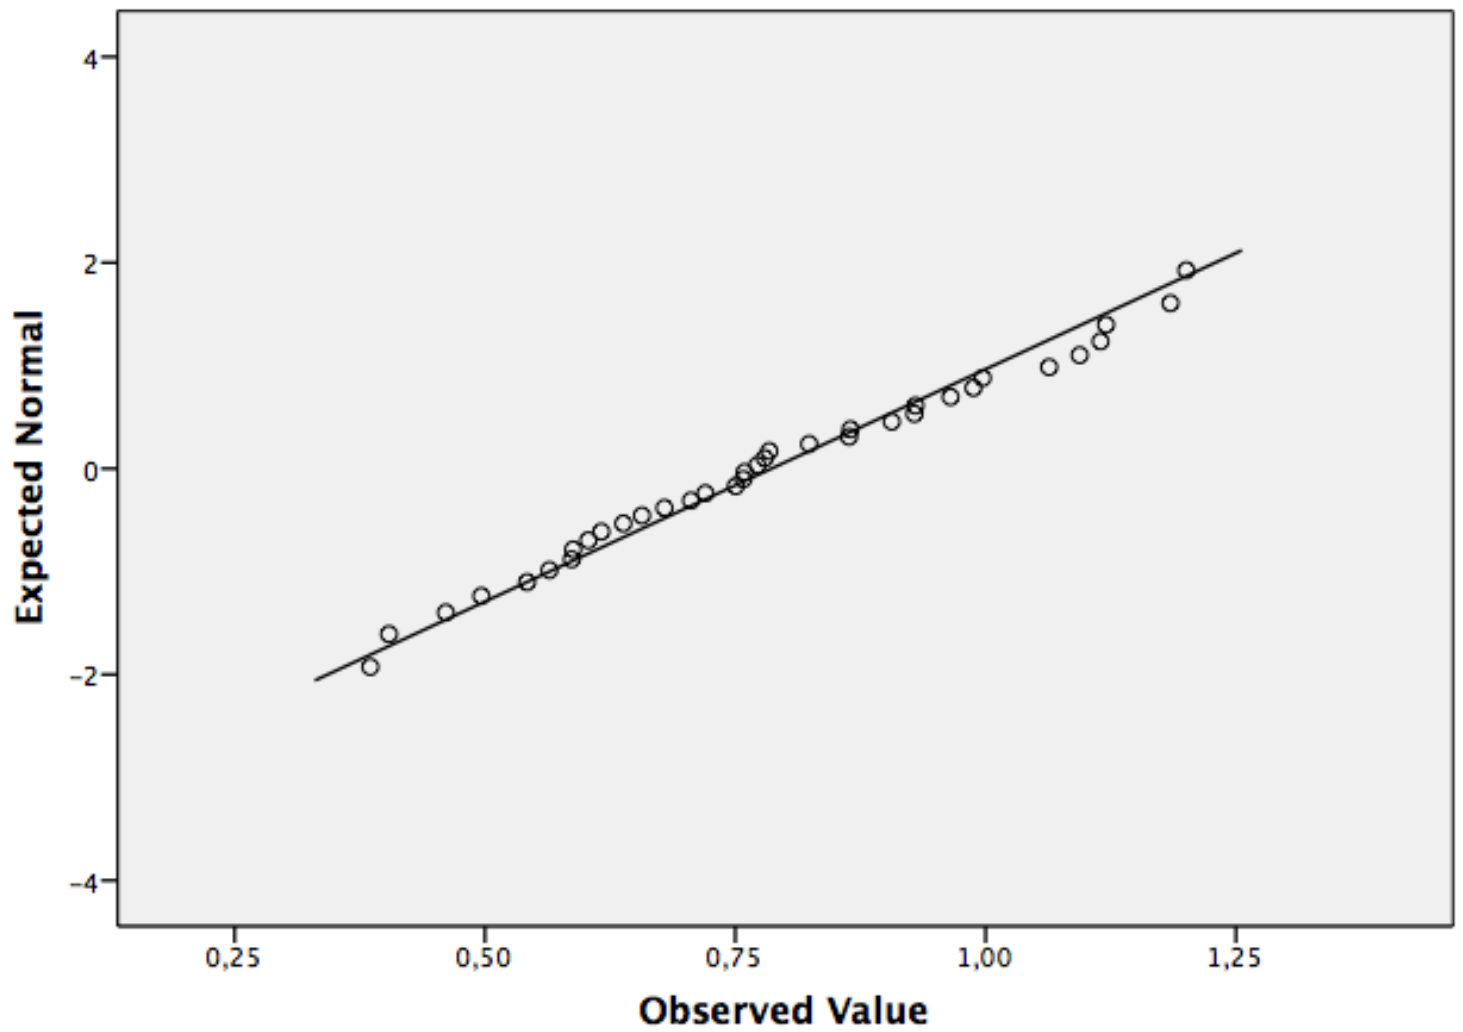



Normal Q-Q Plots

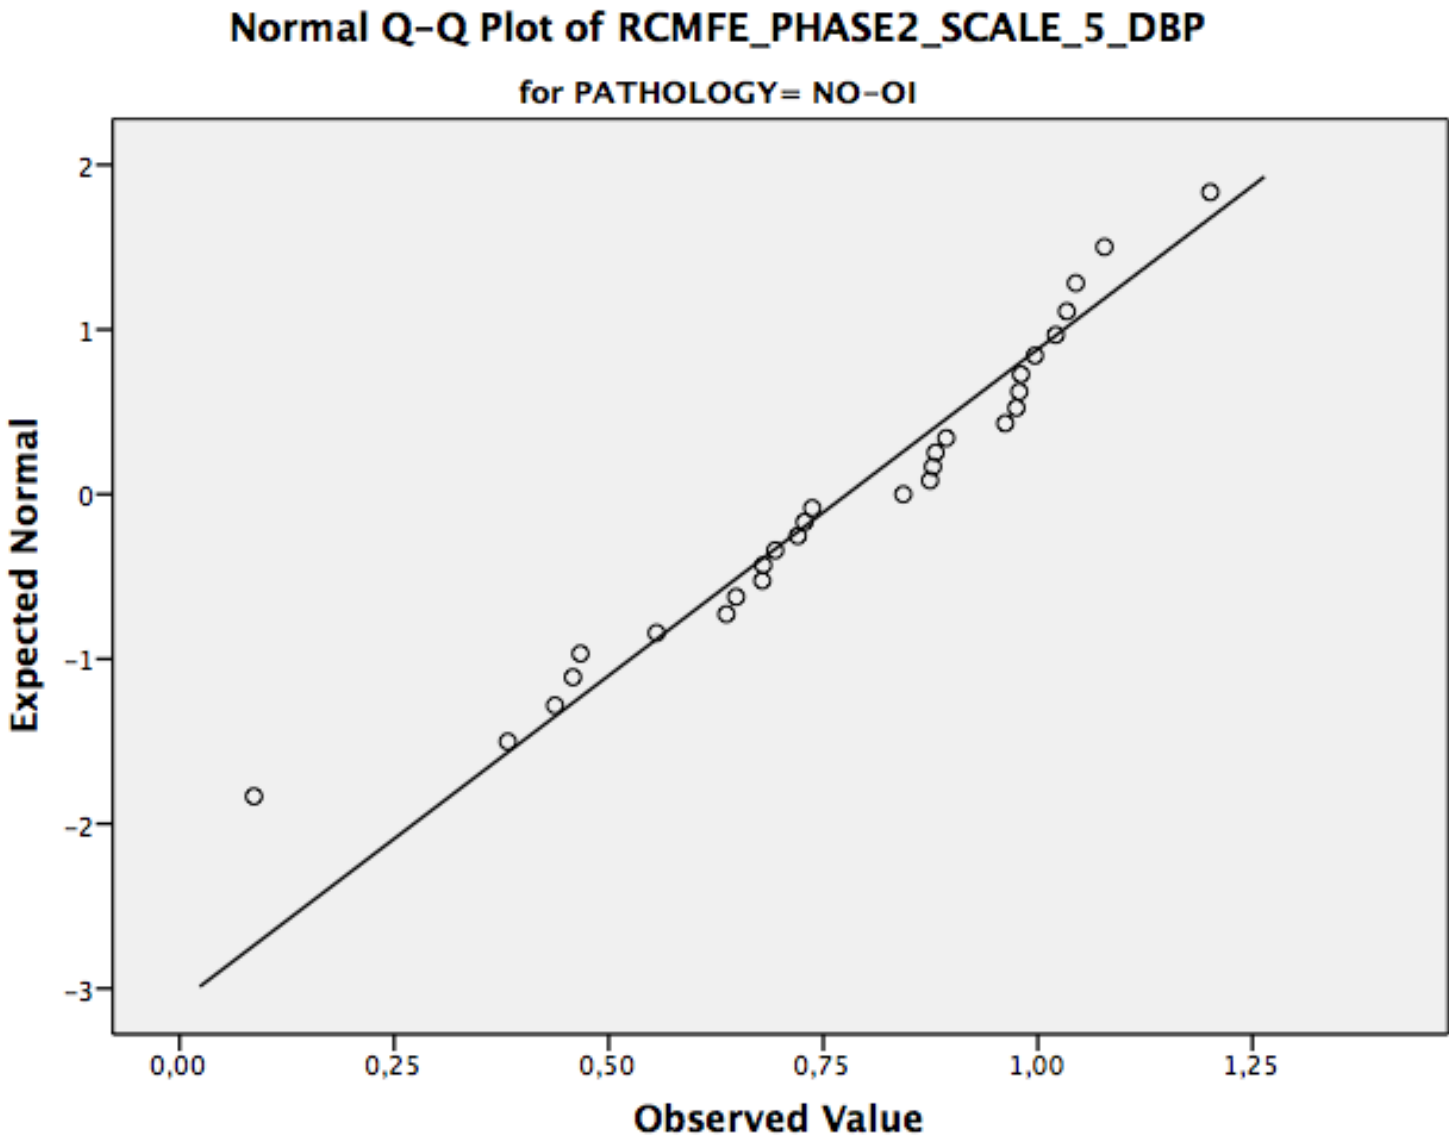

# Normal Q-Q Plot of RCMFE\_PHASE2\_SCALE\_5\_DBP

for PATHOLOGY= OI

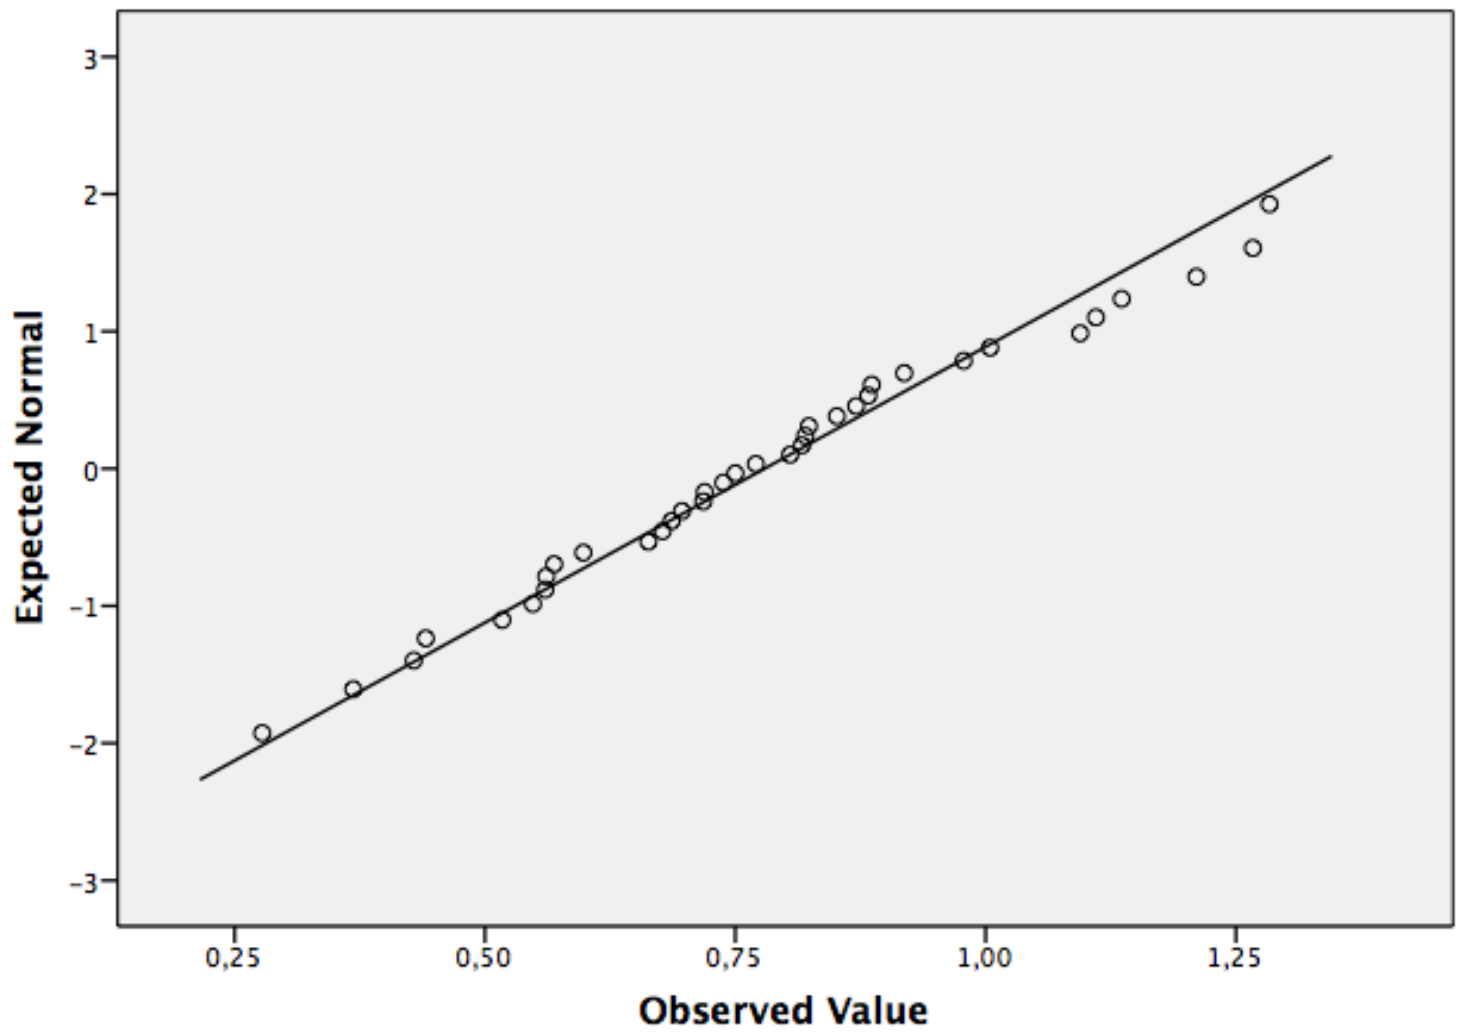

Normal Q-Q Plots

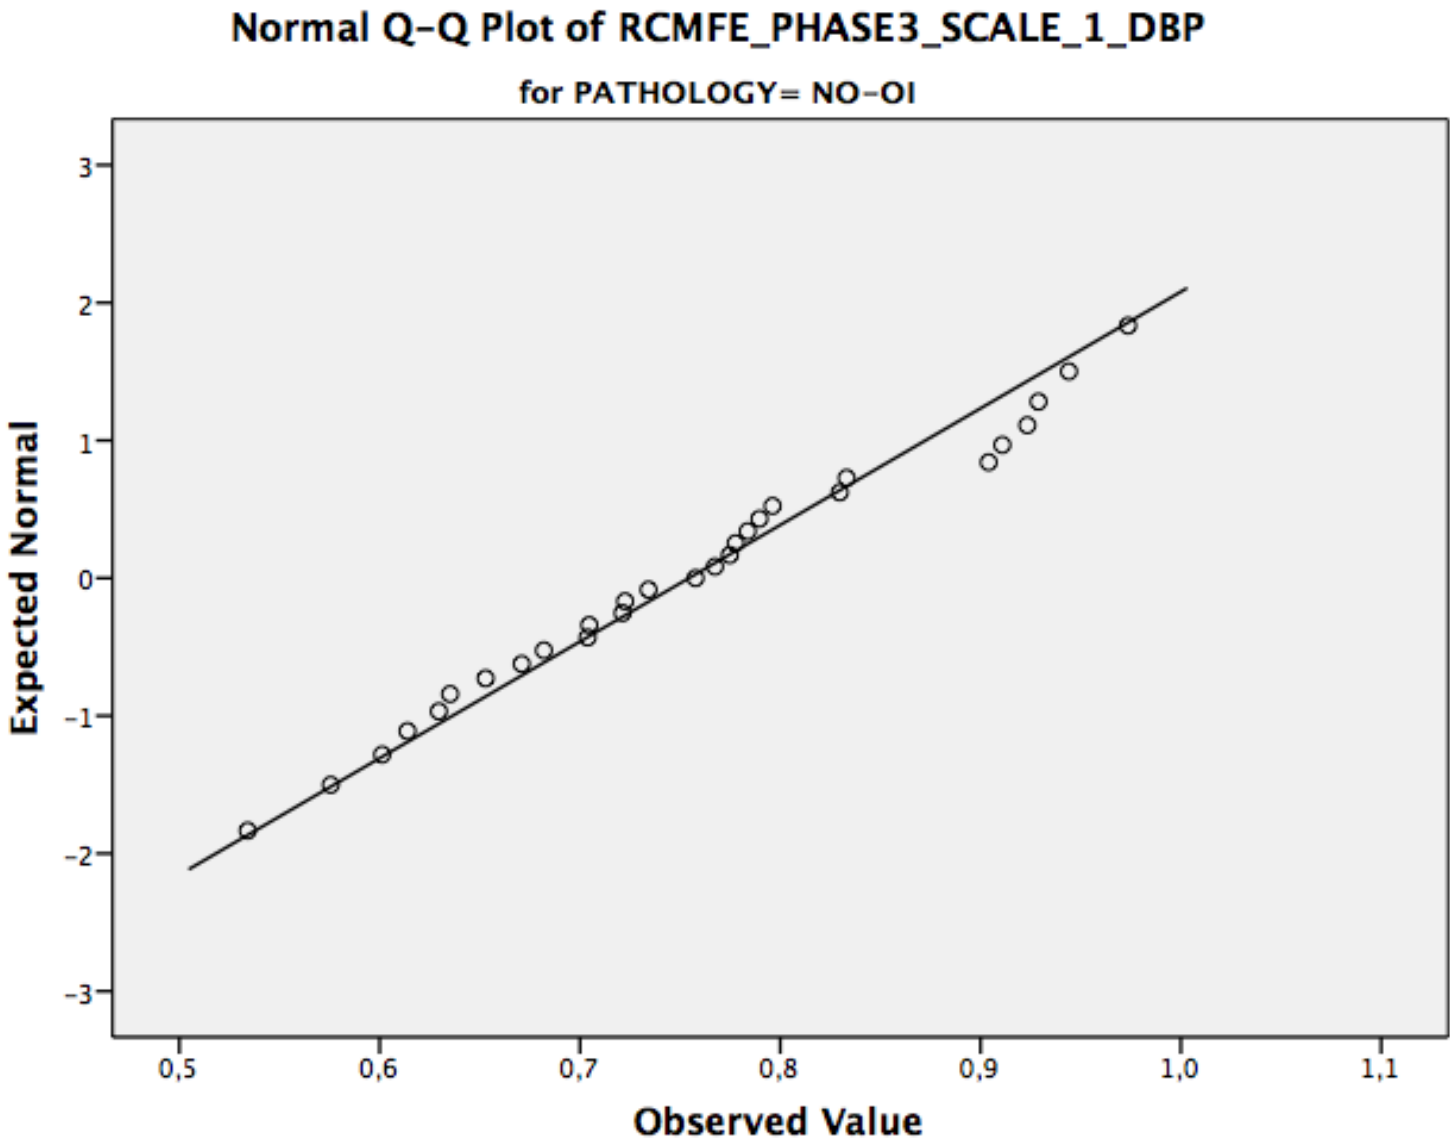

# Normal Q-Q Plot of RCMFE\_PHASE3\_SCALE\_1\_DBP

for PATHOLOGY= OI

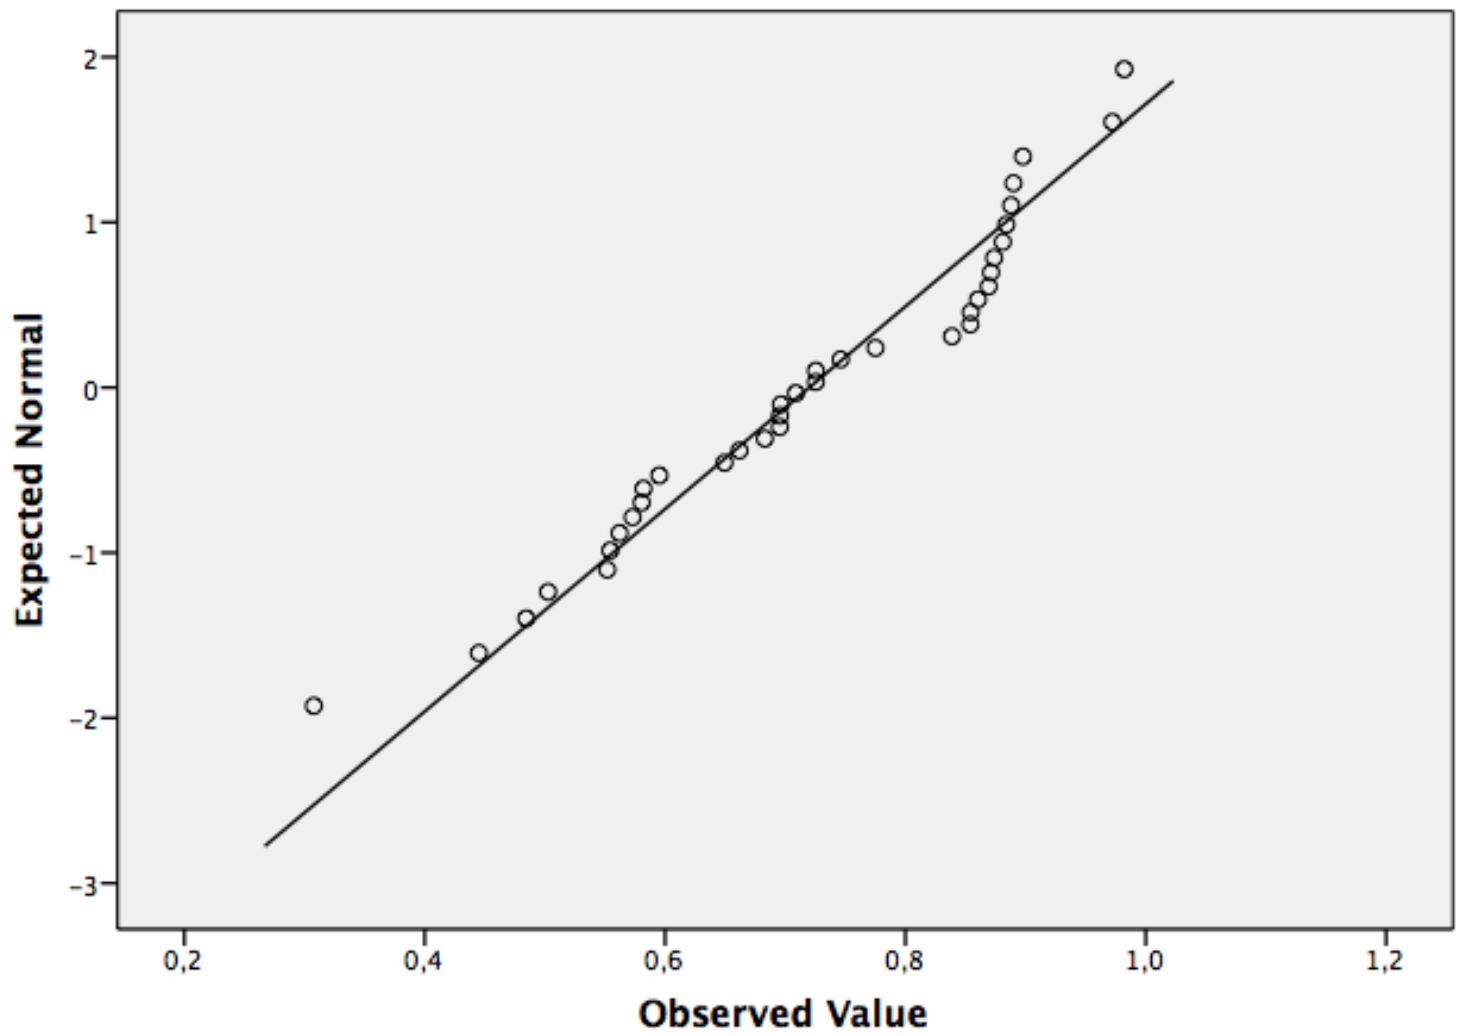

Normal Q-Q Plots

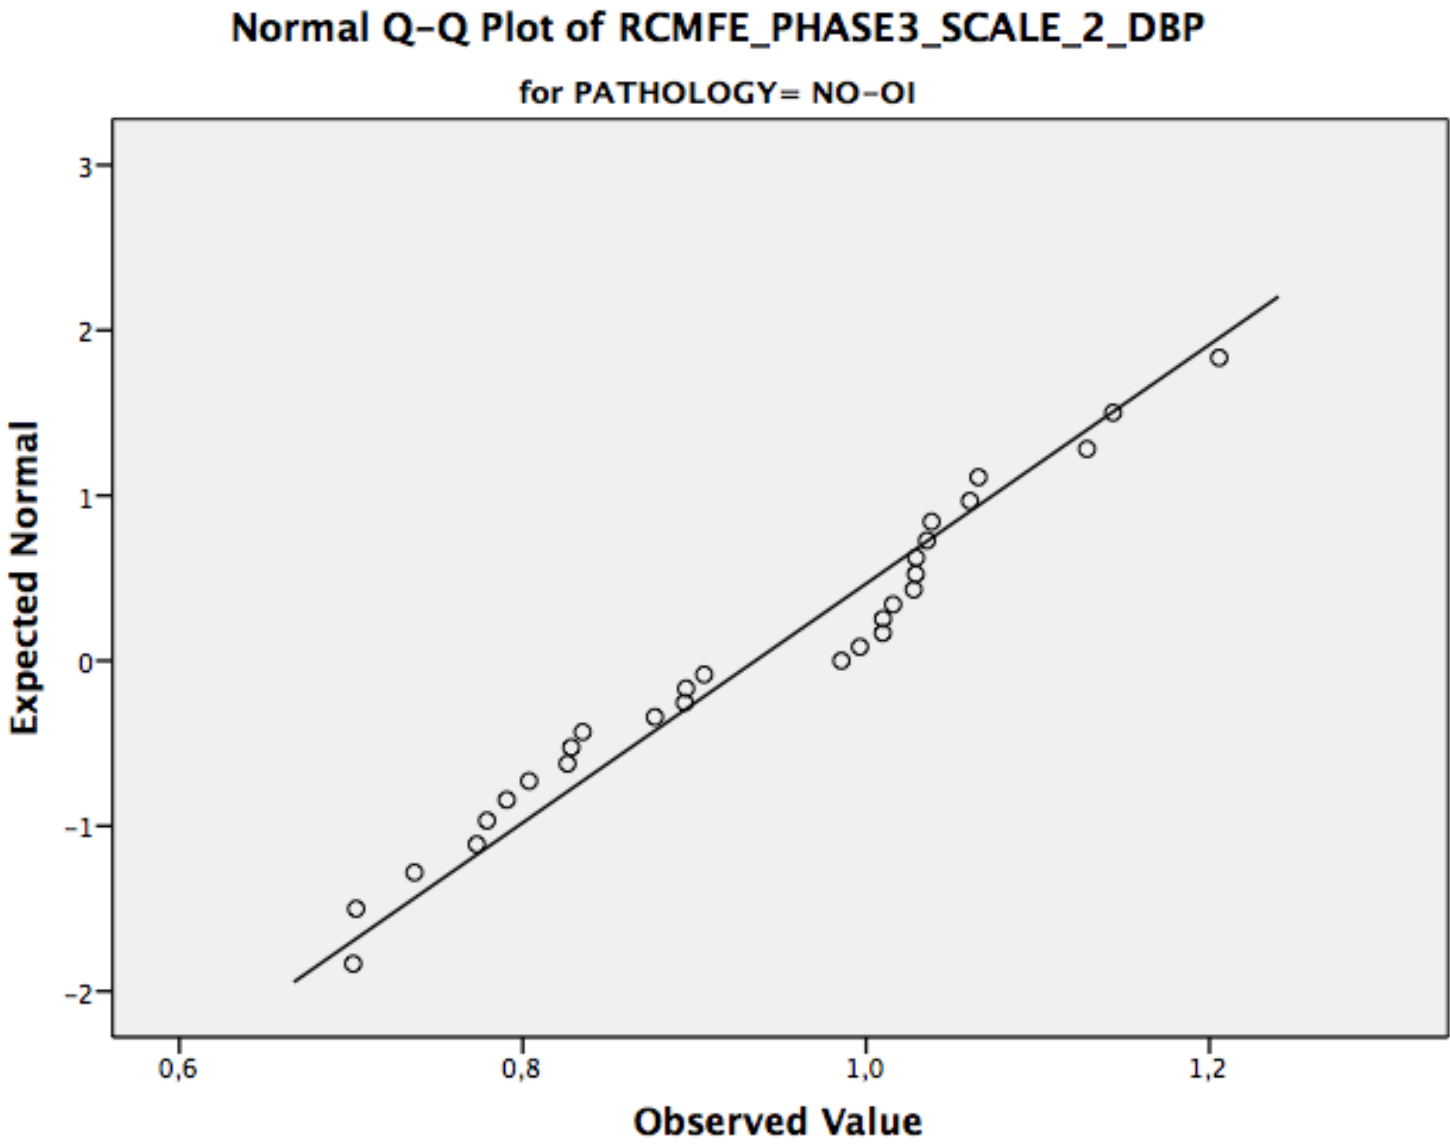

# Normal Q-Q Plot of RCMFE\_PHASE3\_SCALE\_2\_DBP

for PATHOLOGY= OI

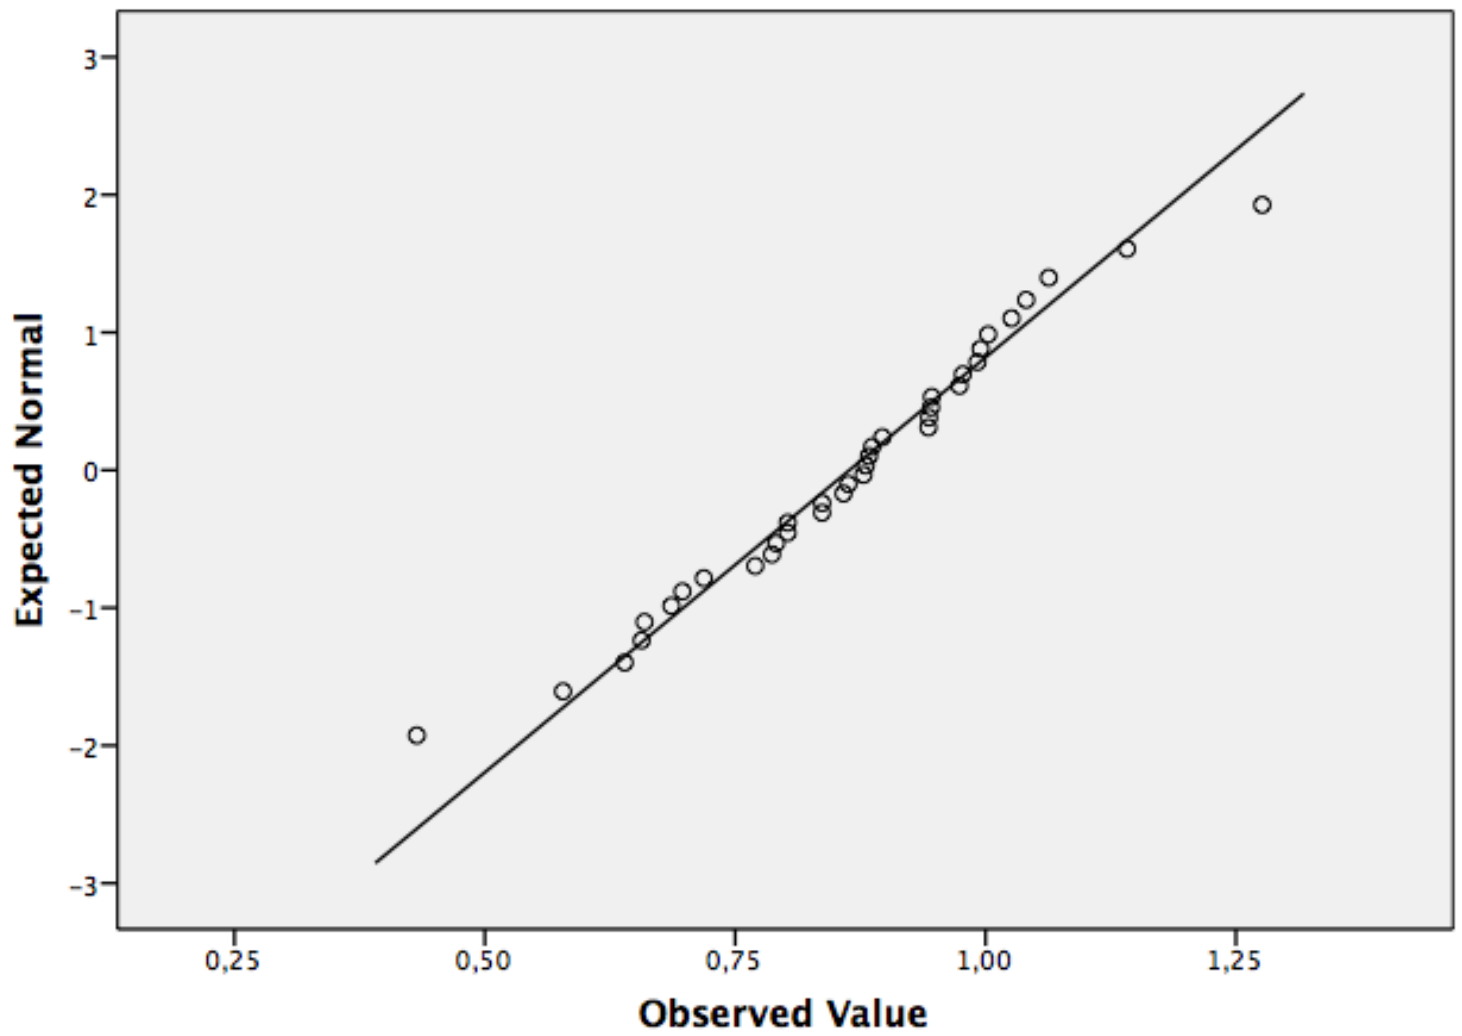

Normal Q-Q Plots

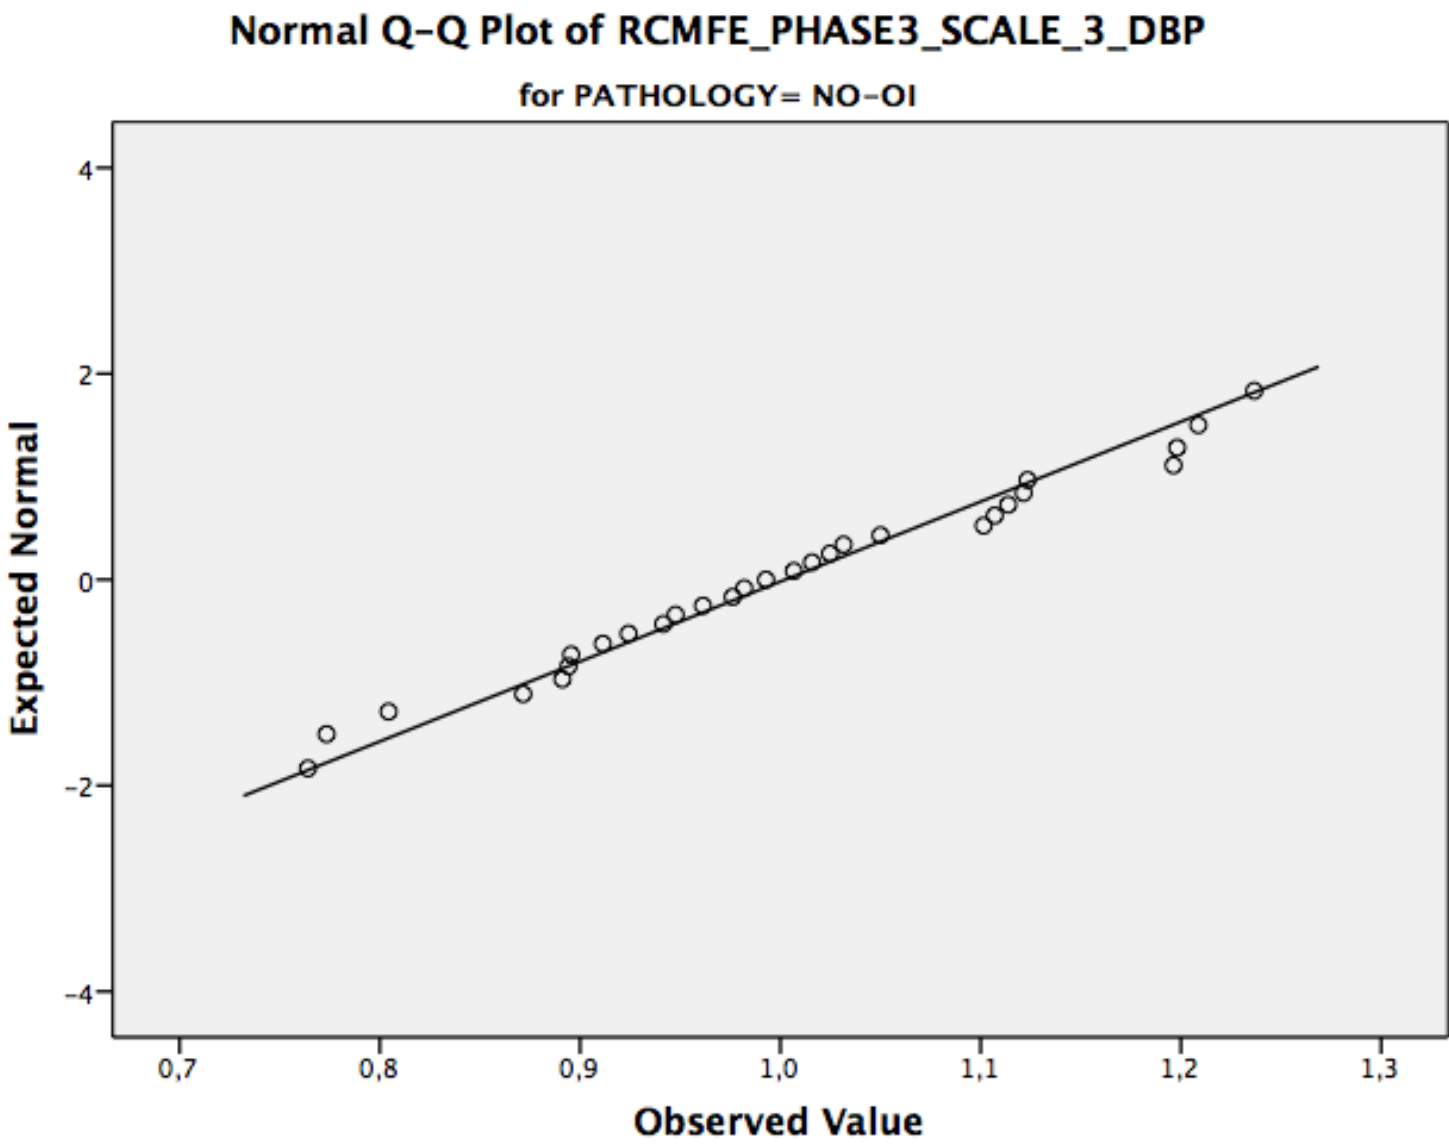

# Normal Q-Q Plot of RCMFE\_PHASE3\_SCALE\_3\_DBP

for PATHOLOGY= OI

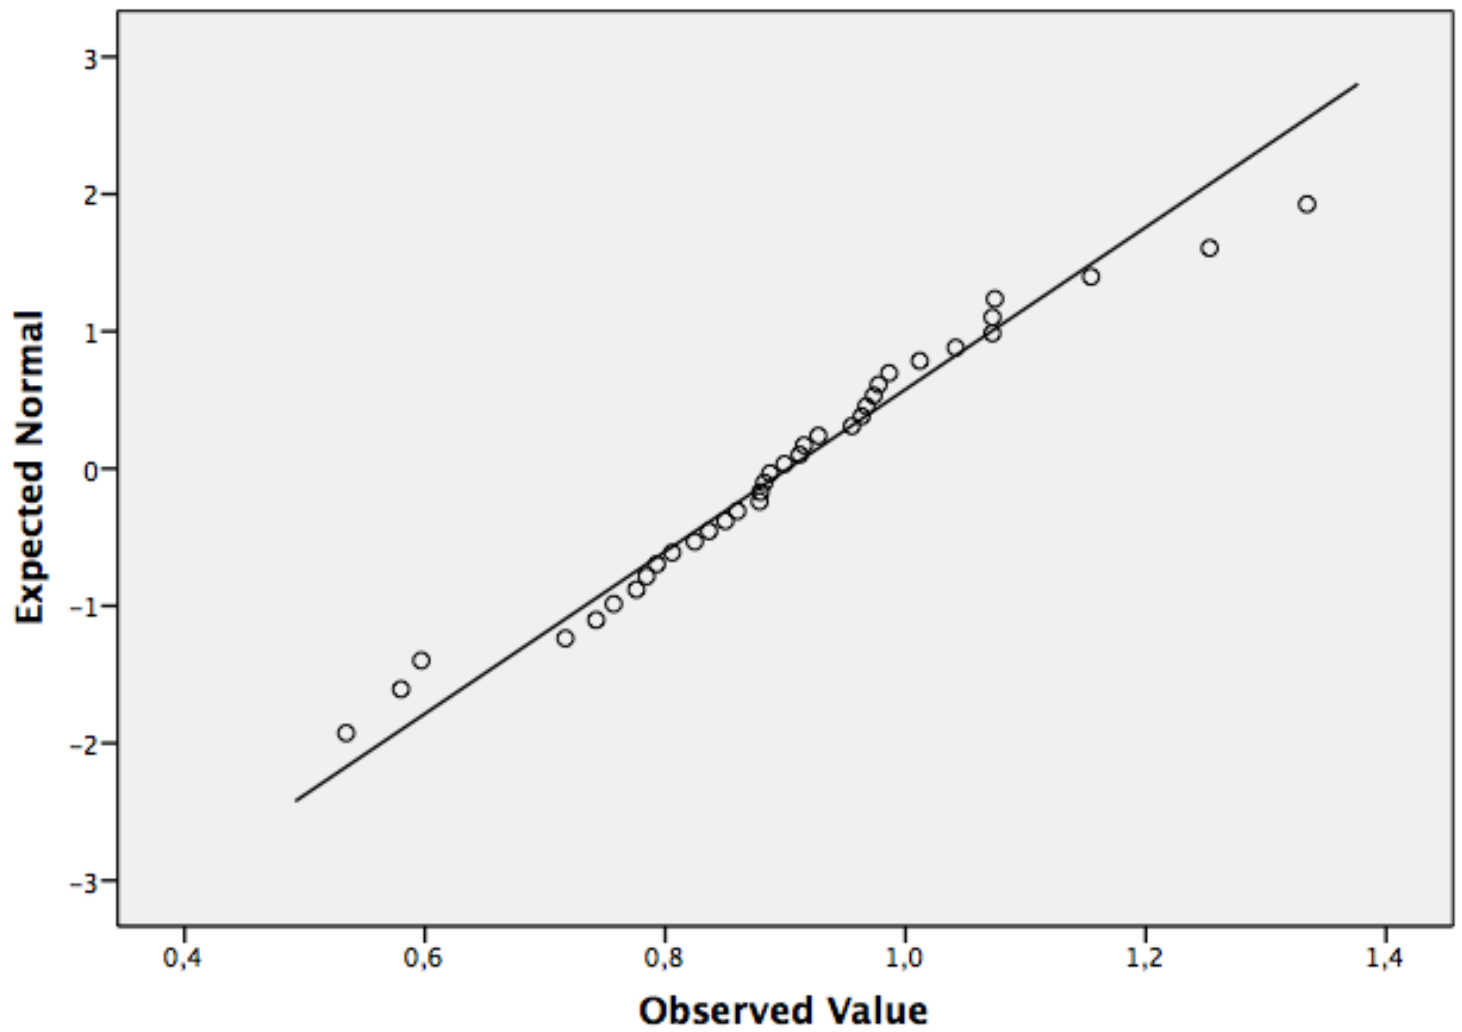



Normal Q-Q Plots

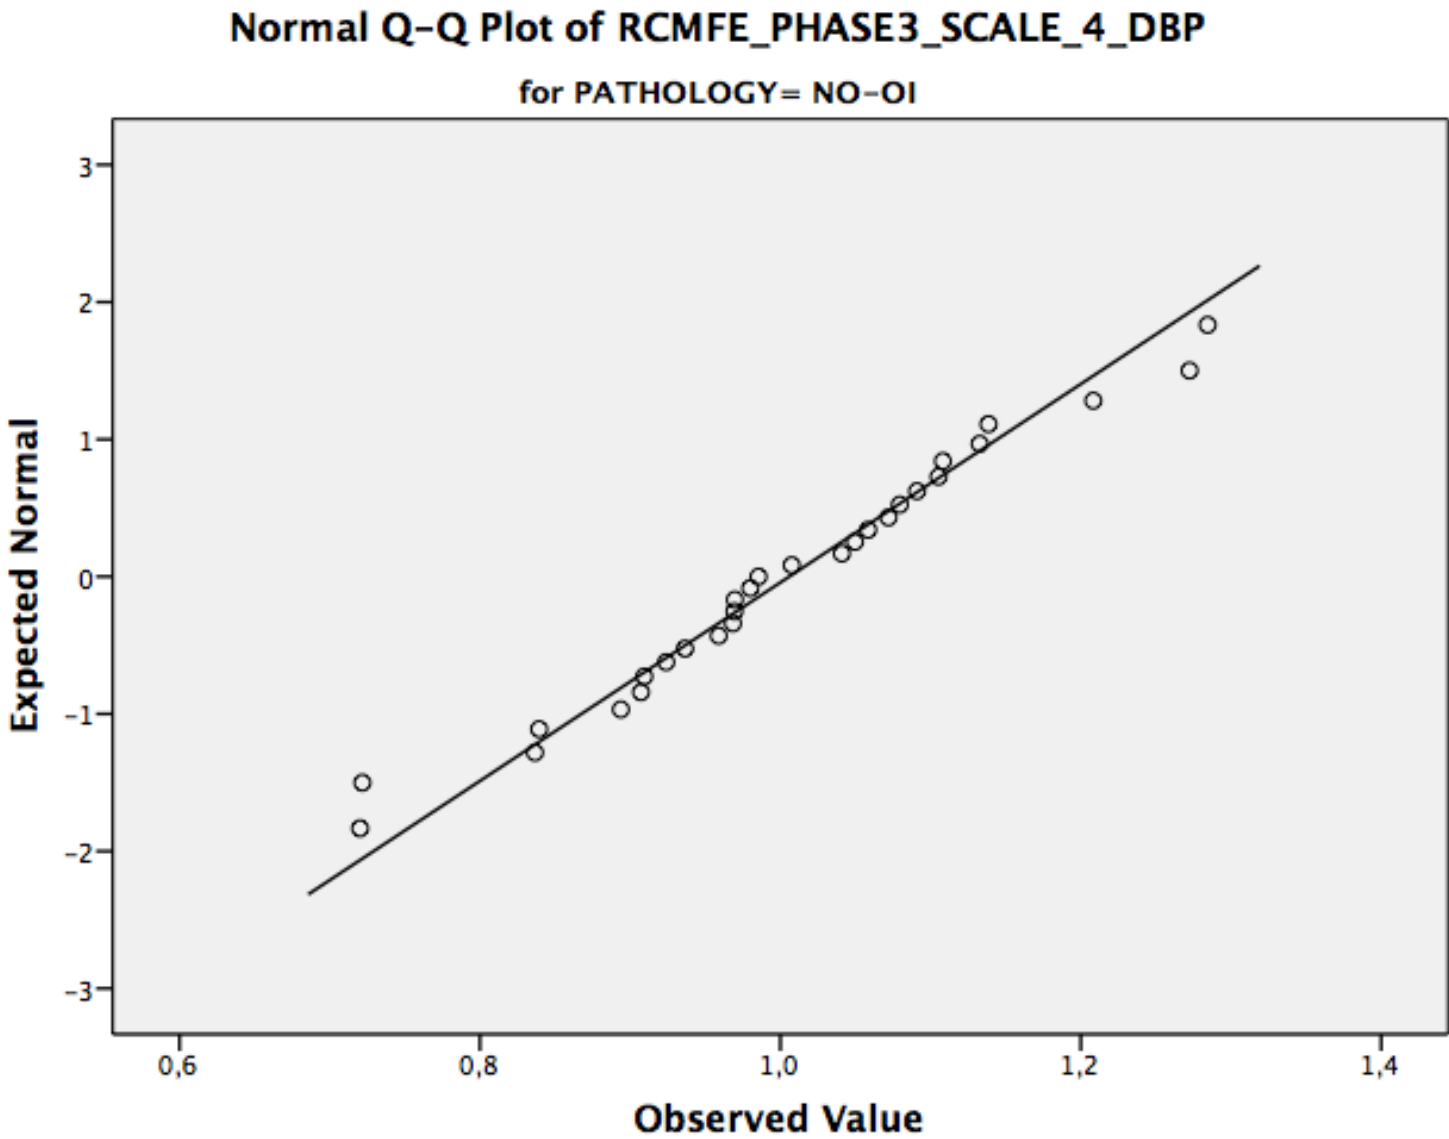

# Normal Q-Q Plot of RCMFE\_PHASE3\_SCALE\_4\_DBP

for PATHOLOGY= OI

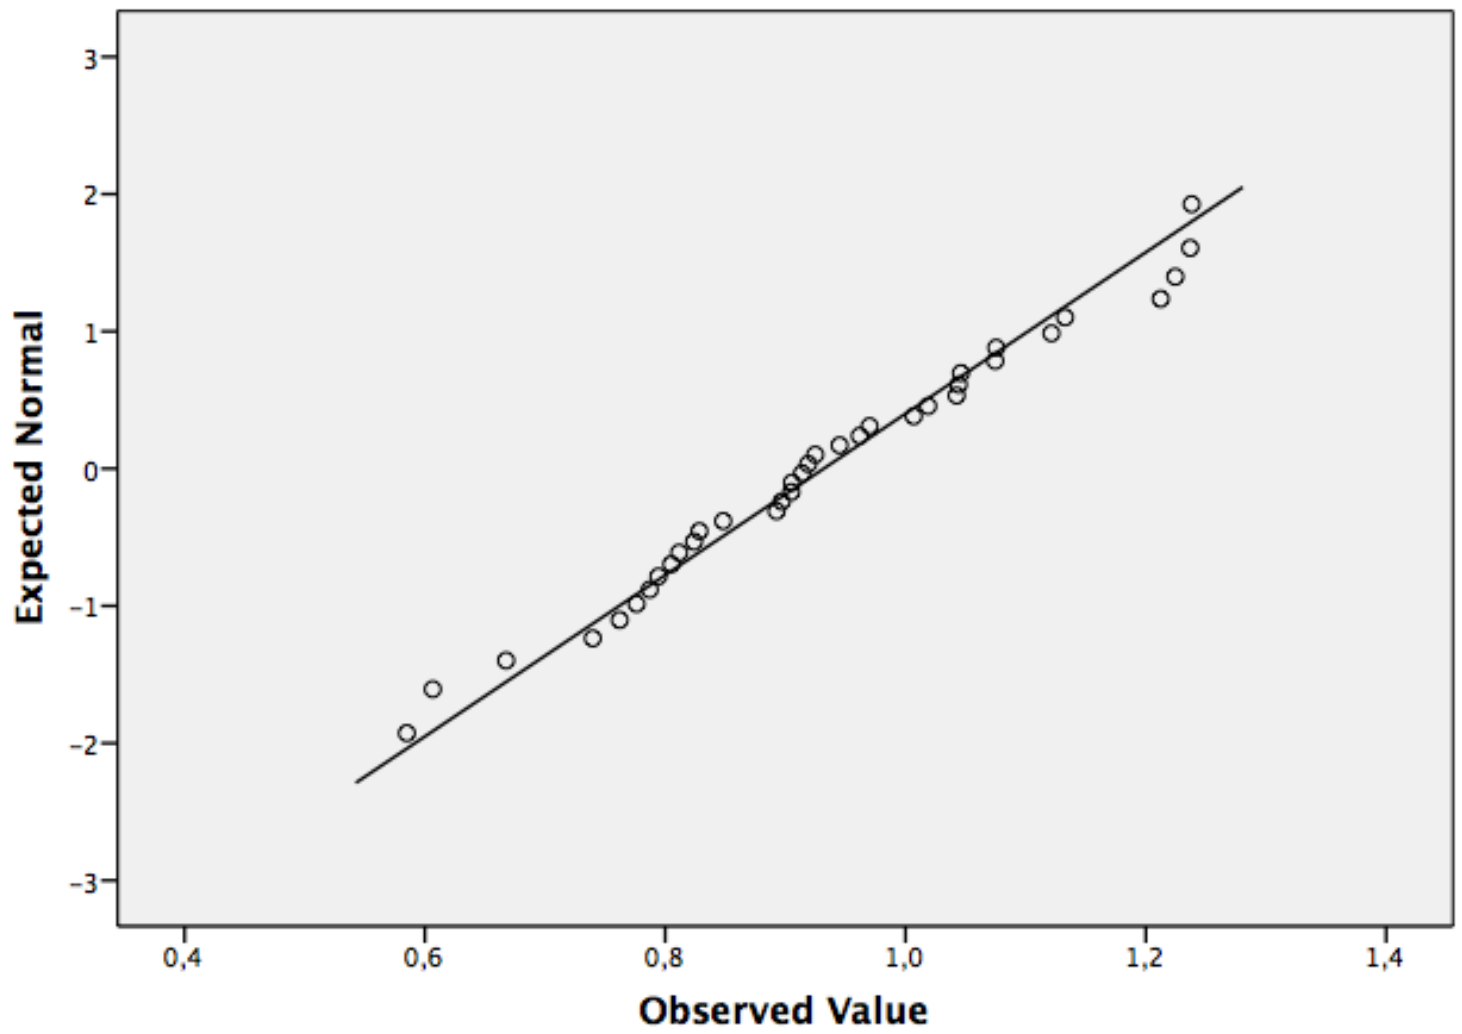

Normal Q-Q Plots

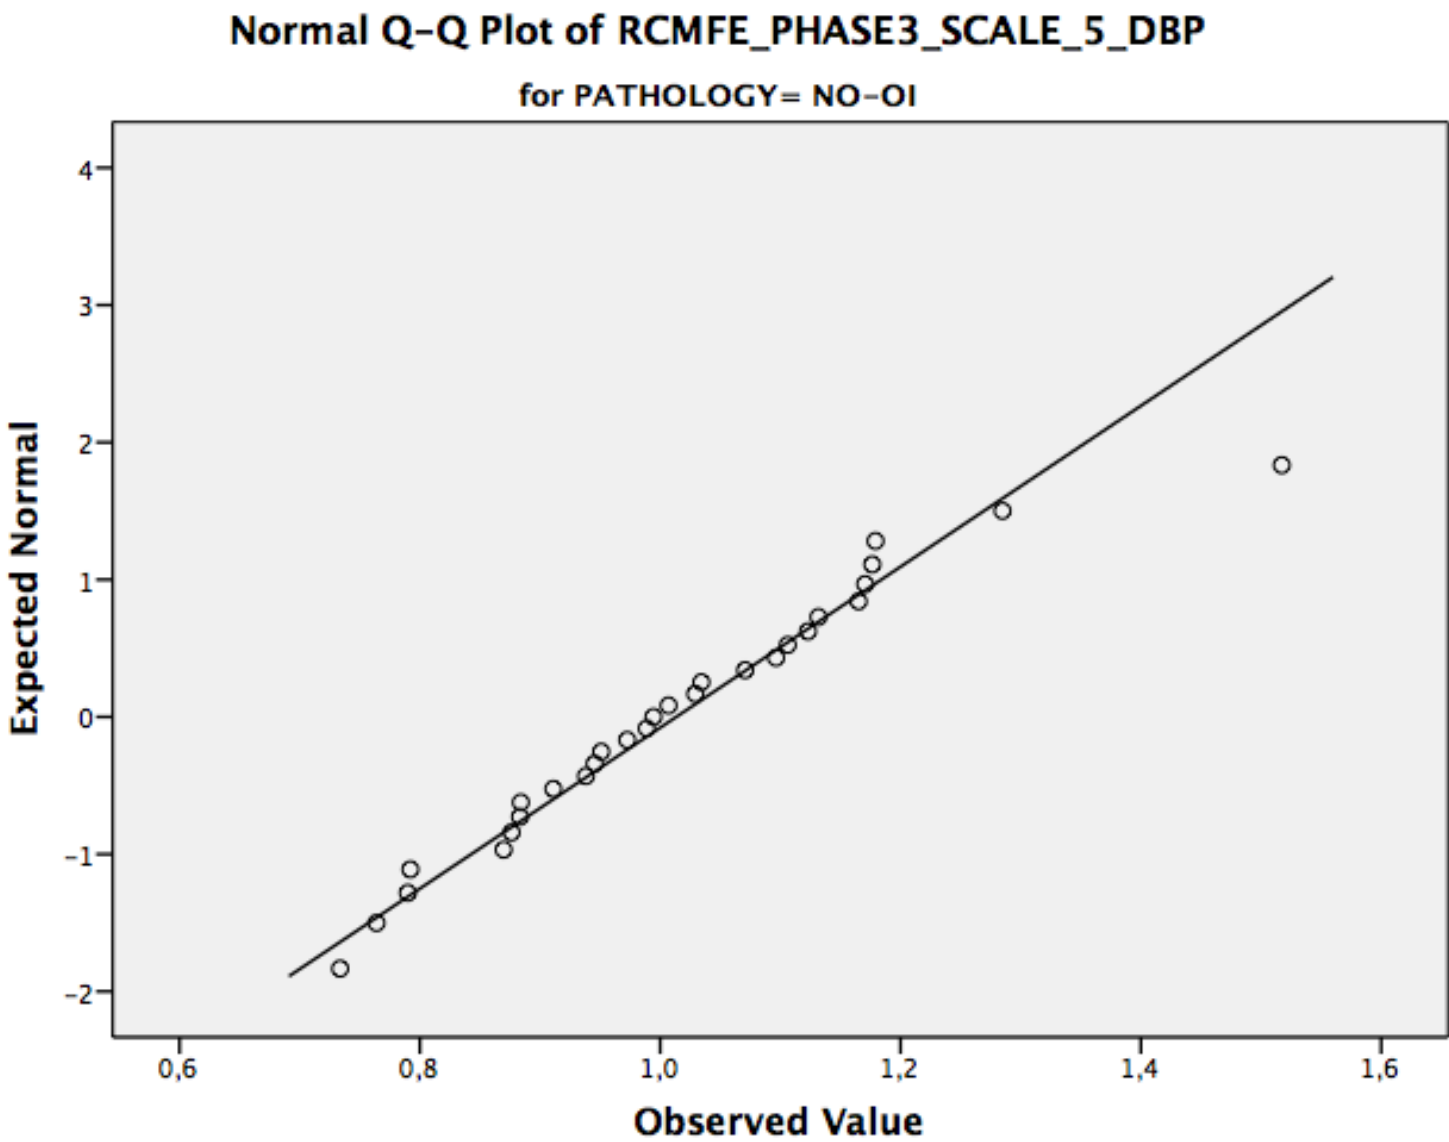

# Normal Q-Q Plot of RCMFE\_PHASE3\_SCALE\_5\_DBP

for PATHOLOGY= OI

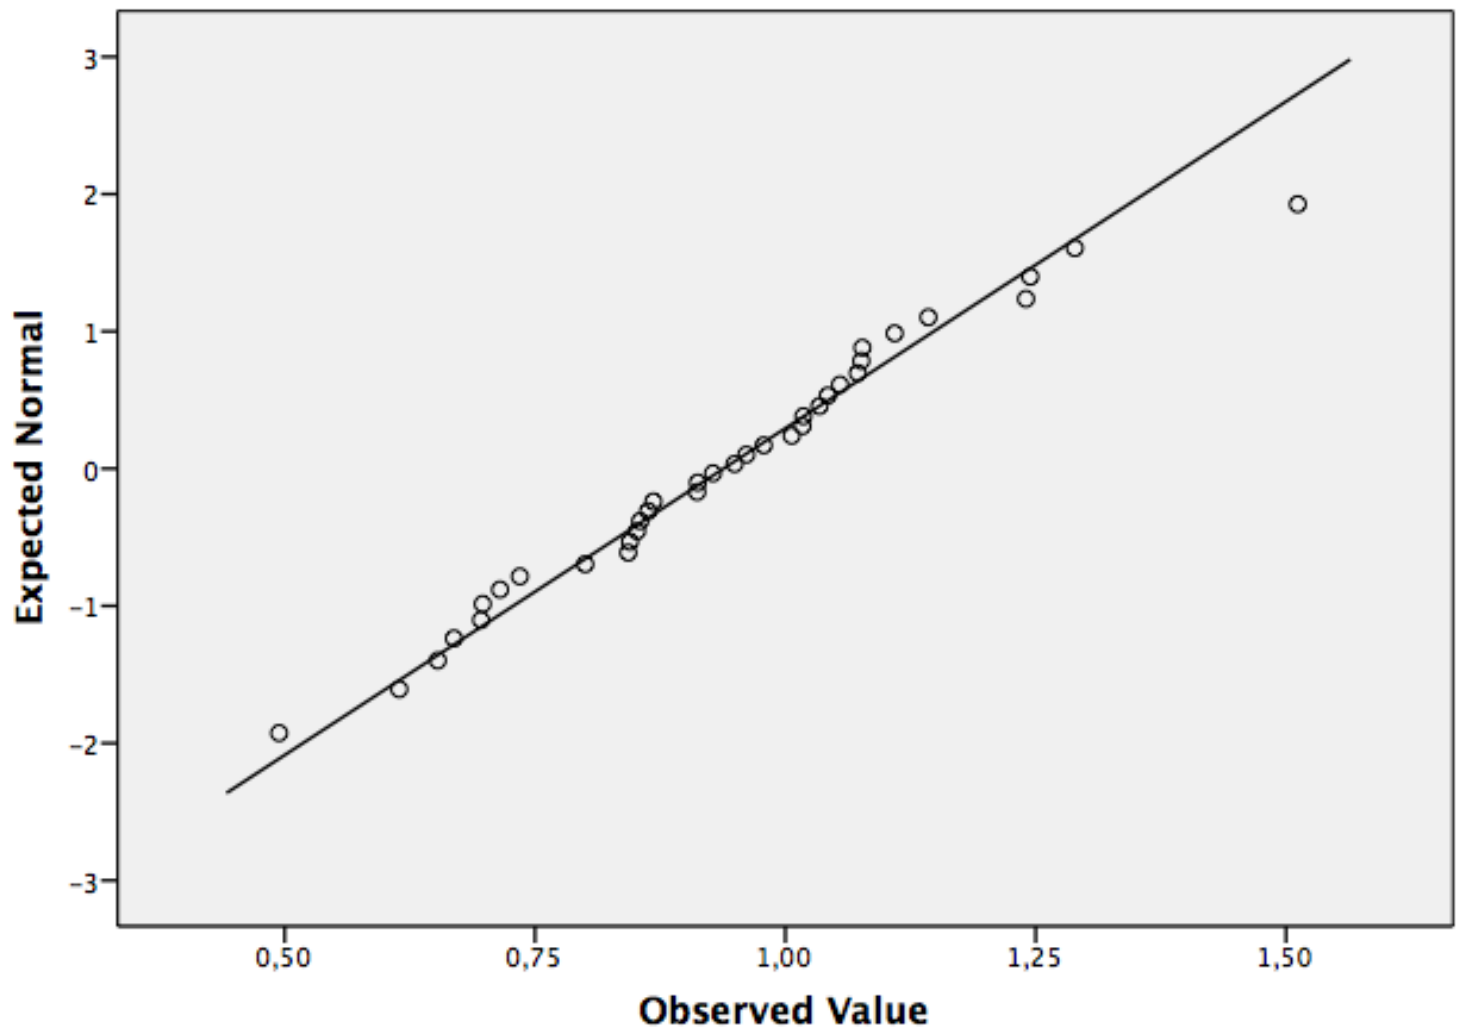

Normal Q-Q Plots

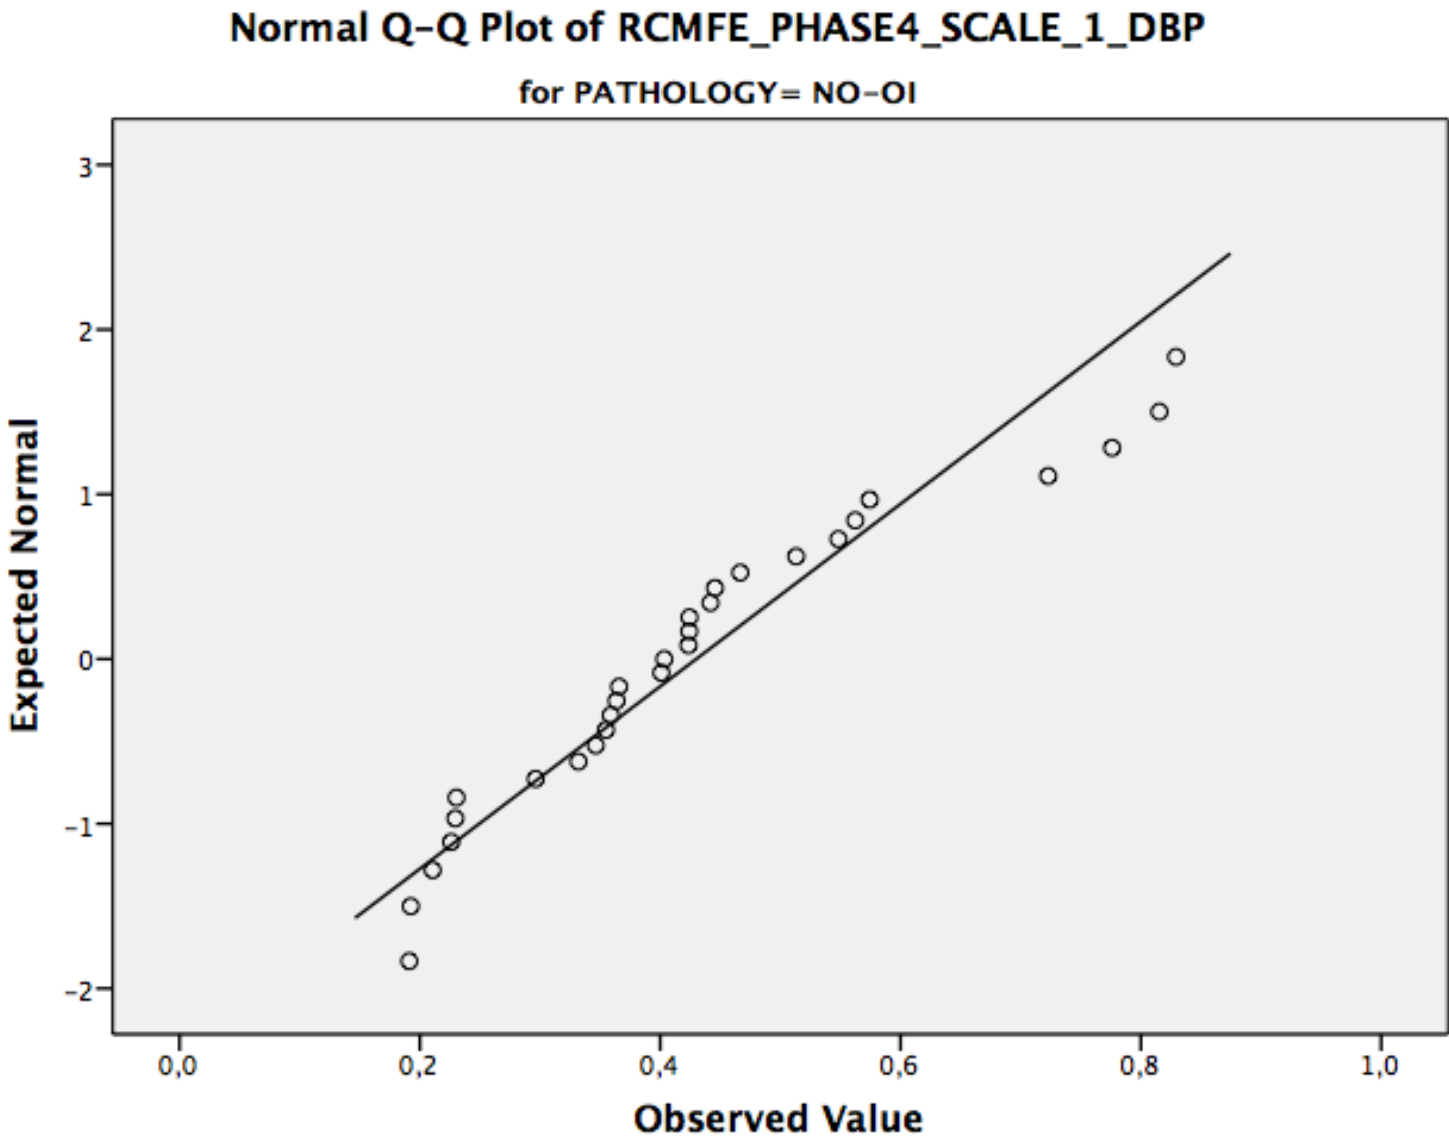

# Normal Q-Q Plot of RCMFE\_PHASE4\_SCALE\_1\_DBP

for PATHOLOGY= OI

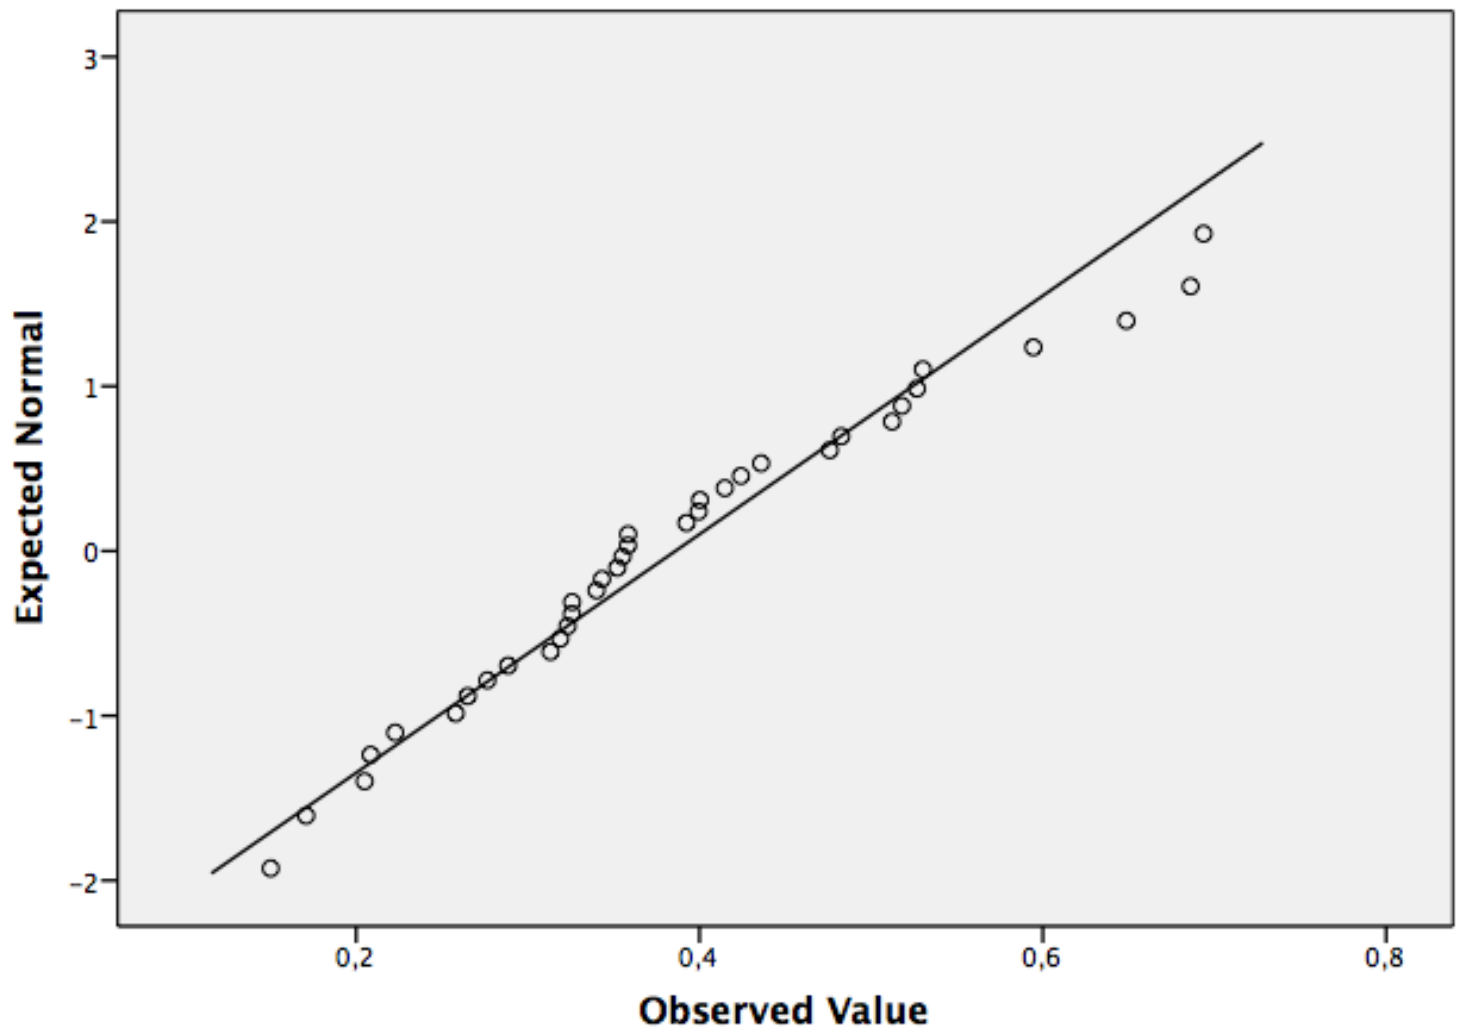

Normal Q-Q Plots

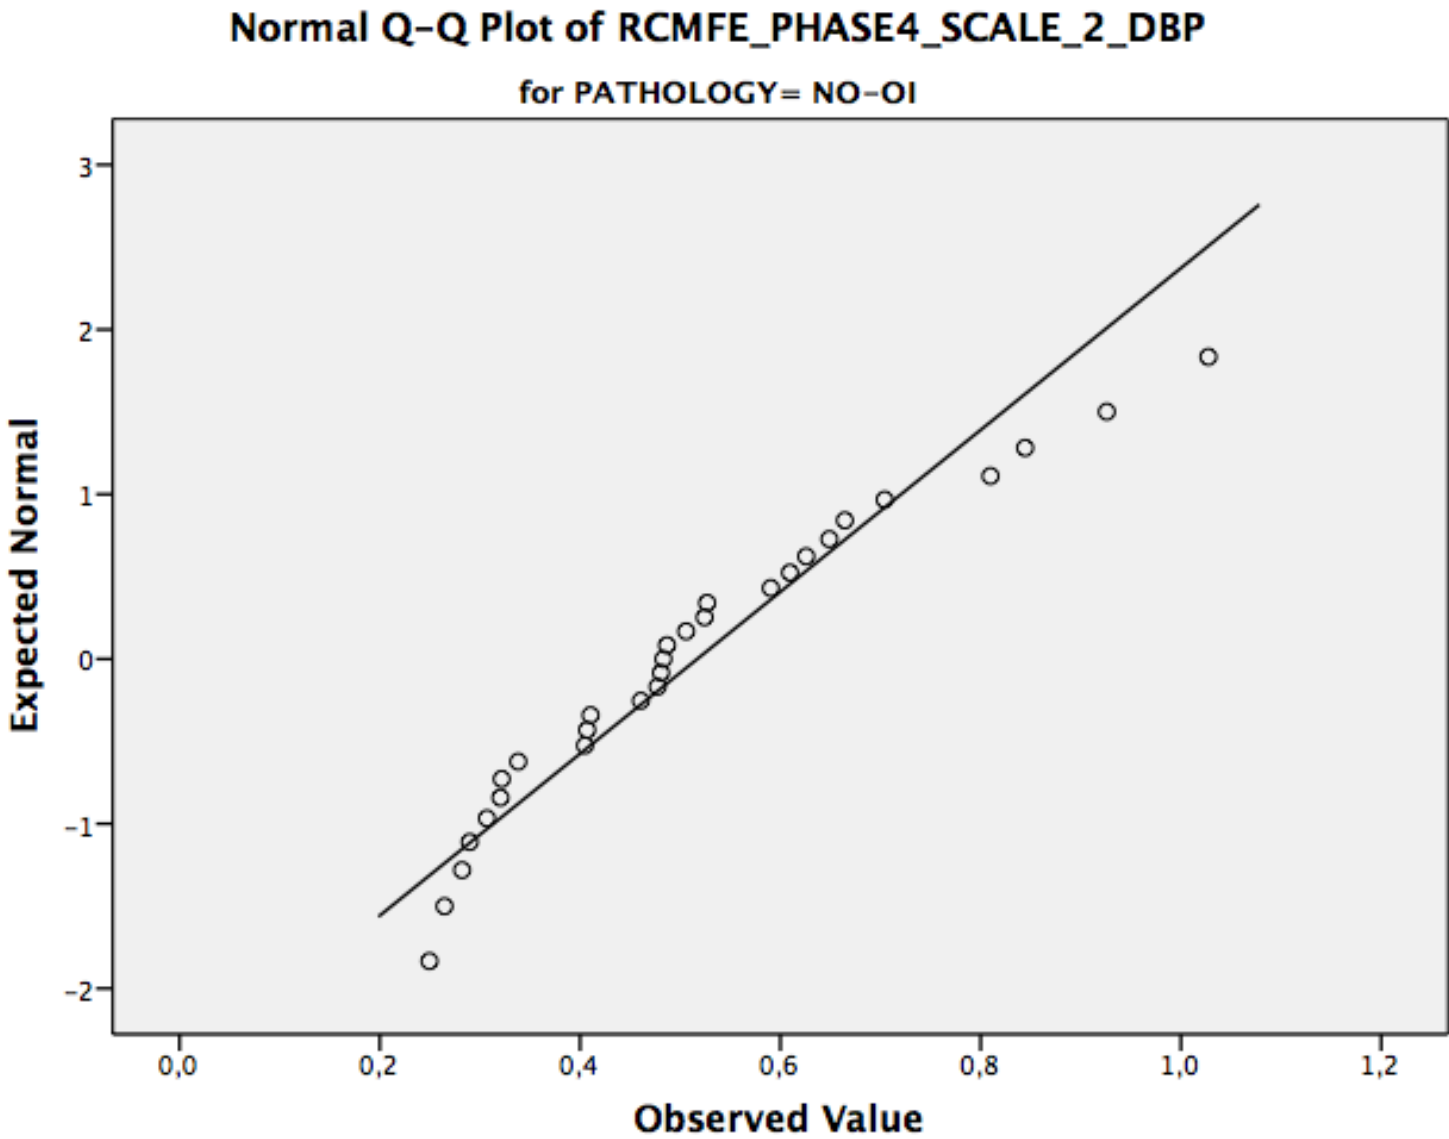

# Normal Q-Q Plot of RCMFE\_PHASE4\_SCALE\_2\_DBP

for PATHOLOGY= OI

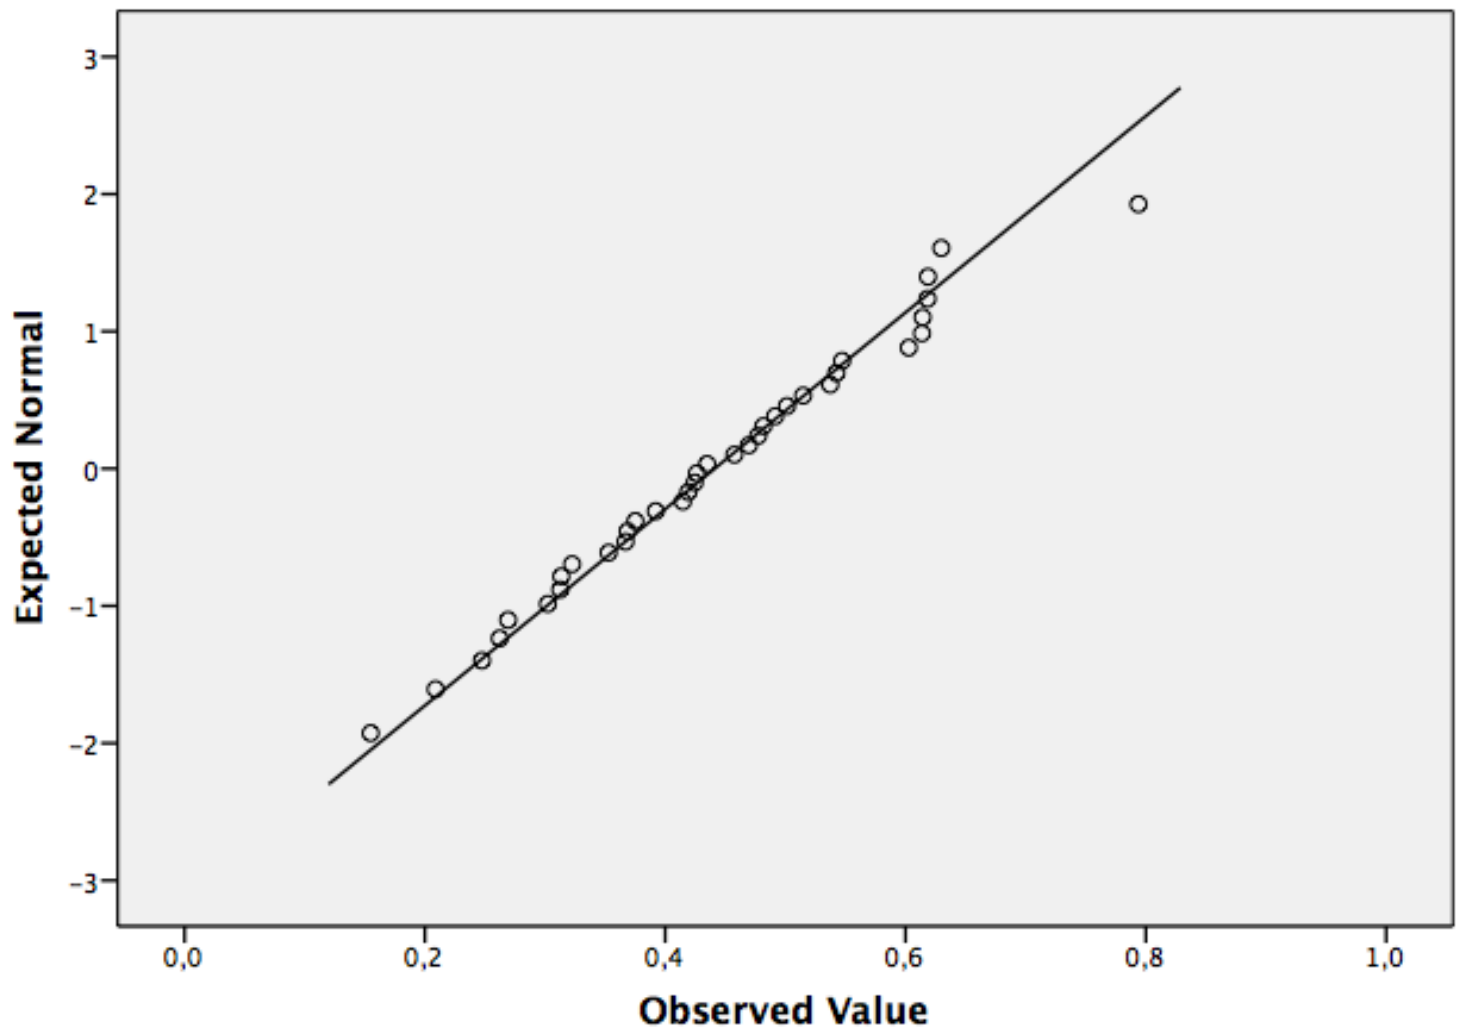



Normal Q-Q Plots

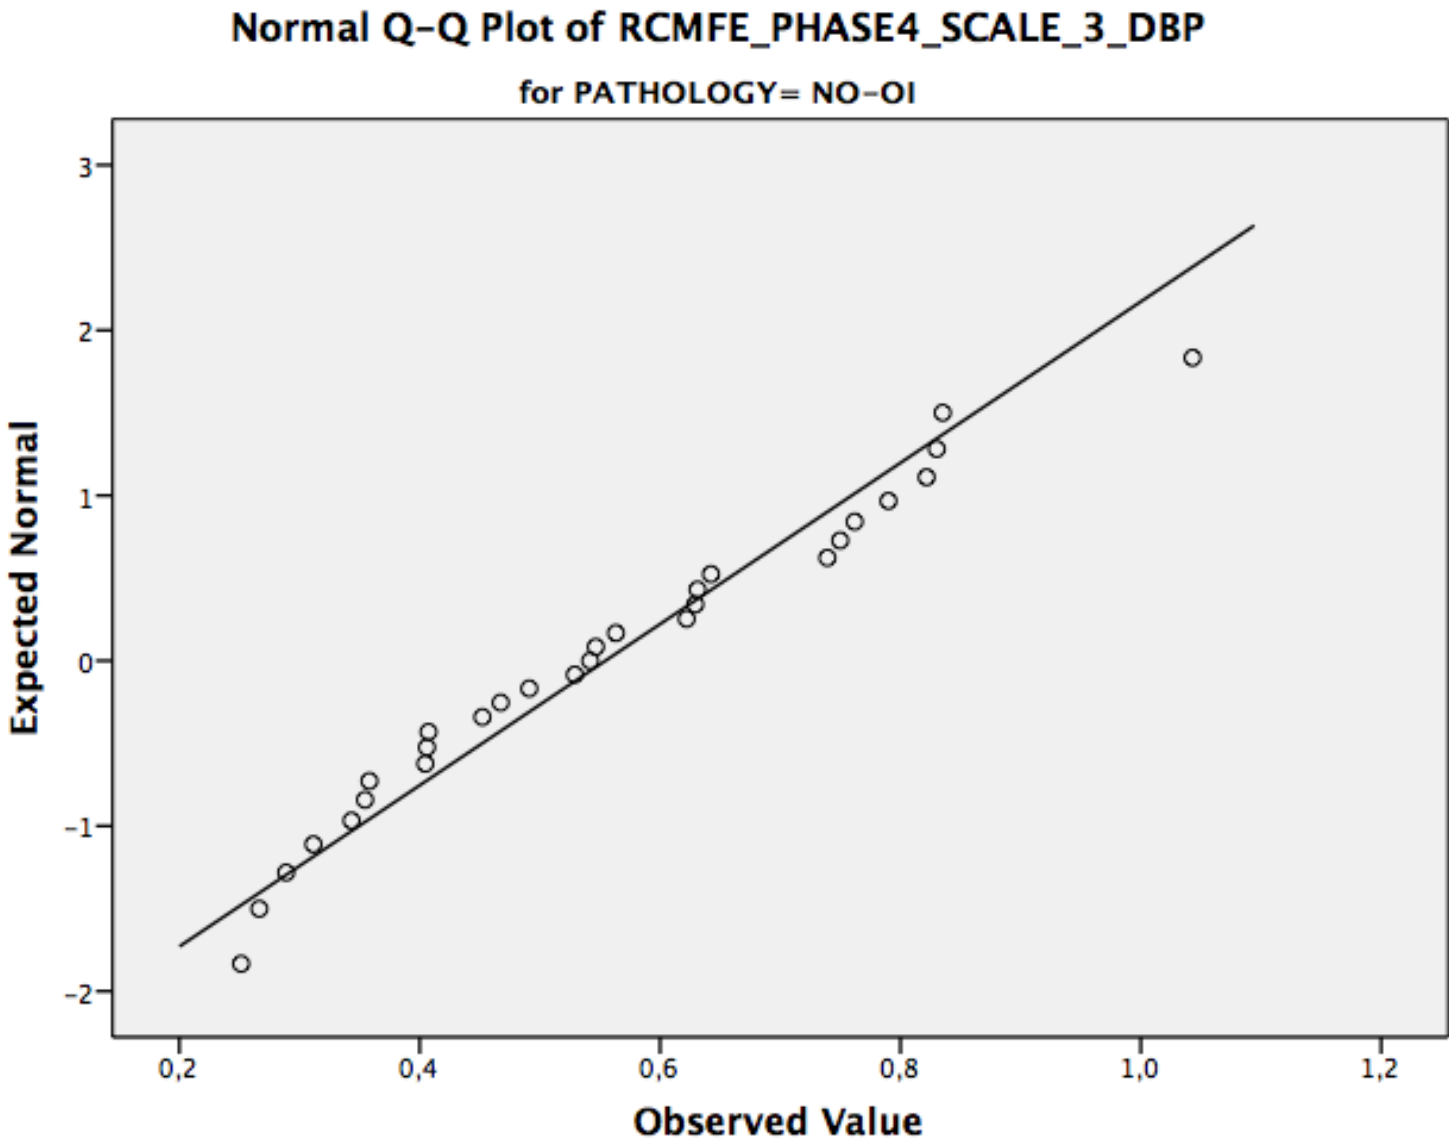

# Normal Q-Q Plot of RCMFE\_PHASE4\_SCALE\_3\_DBP

for PATHOLOGY= OI

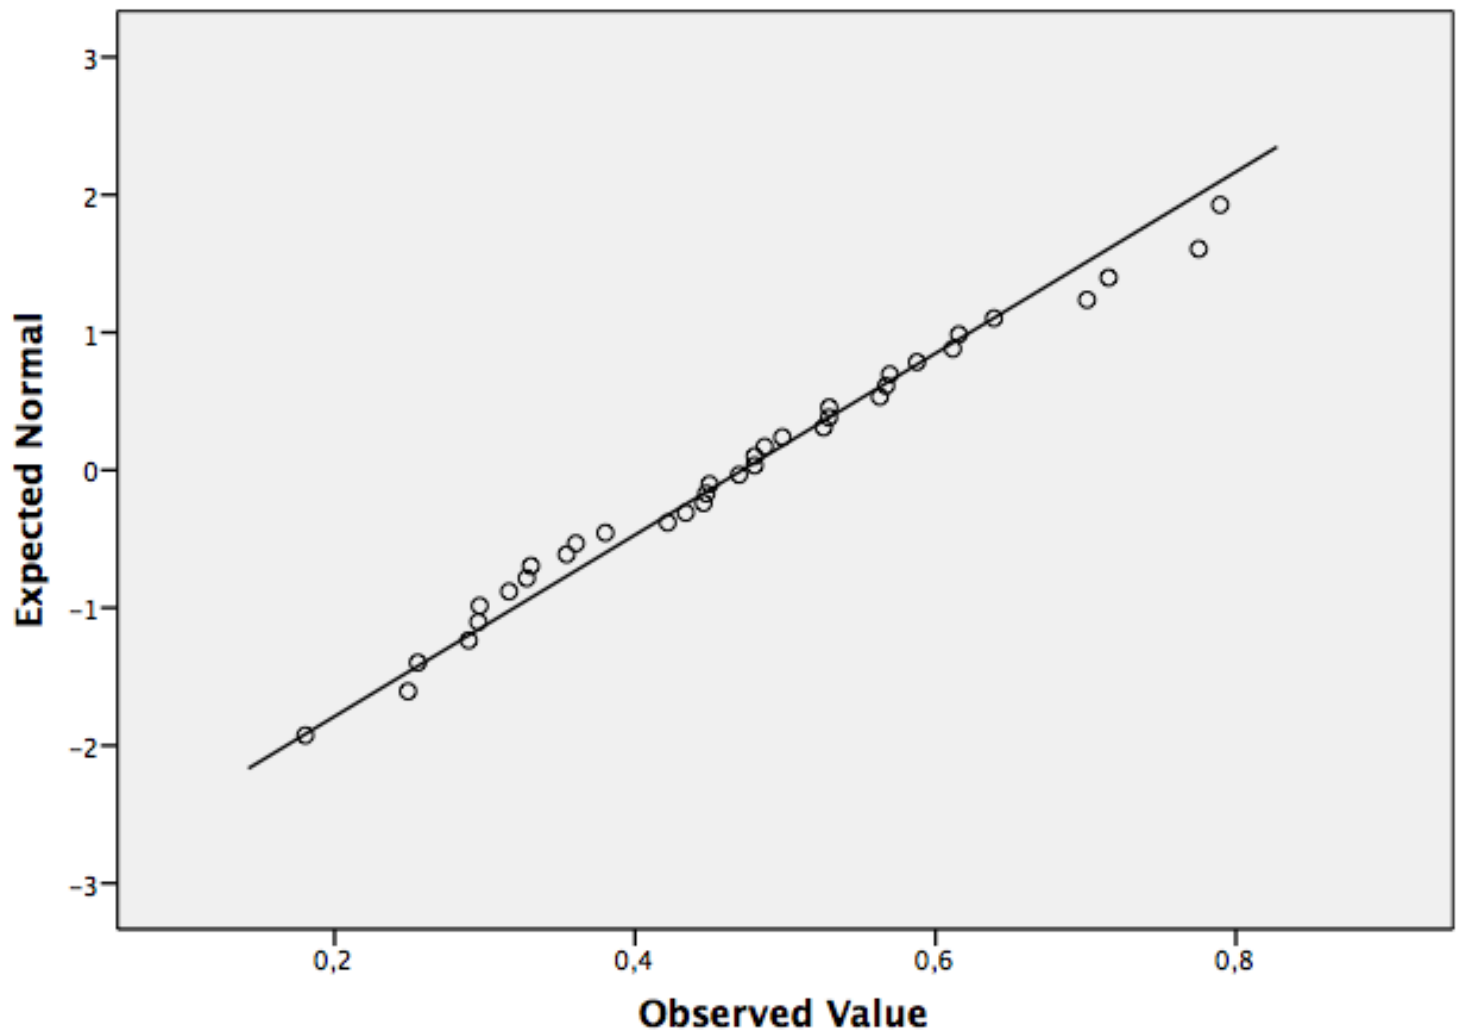

Normal Q-Q Plots

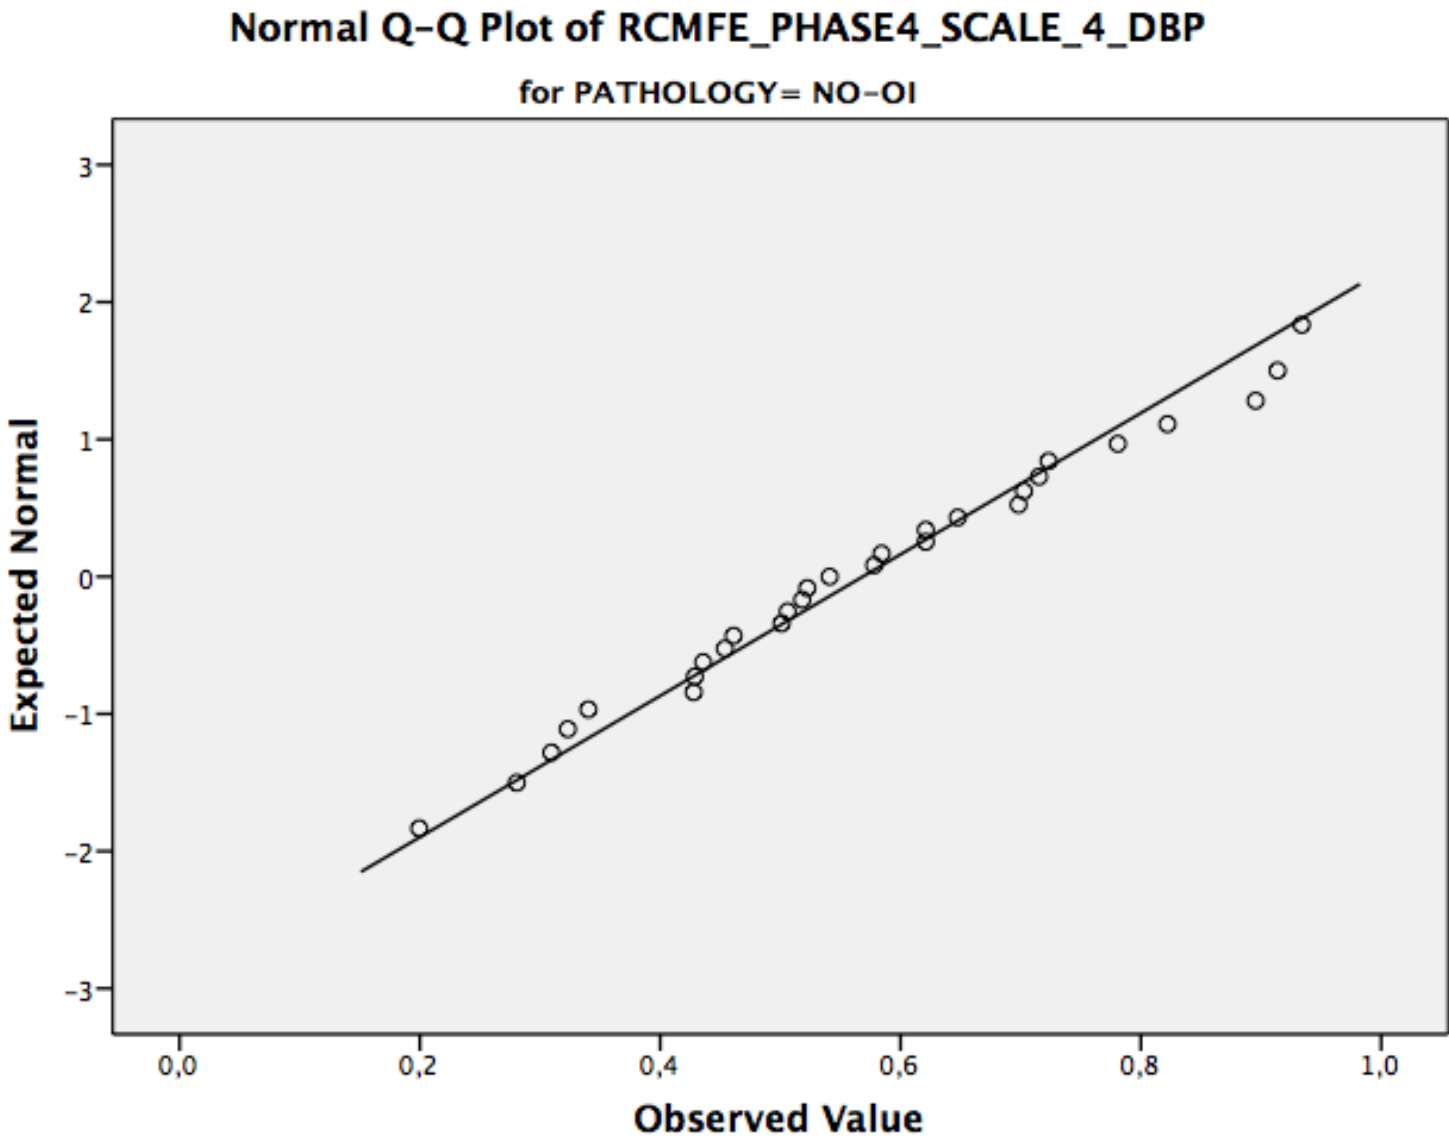

# Normal Q-Q Plot of RCMFE\_PHASE4\_SCALE\_4\_DBP

for PATHOLOGY= OI

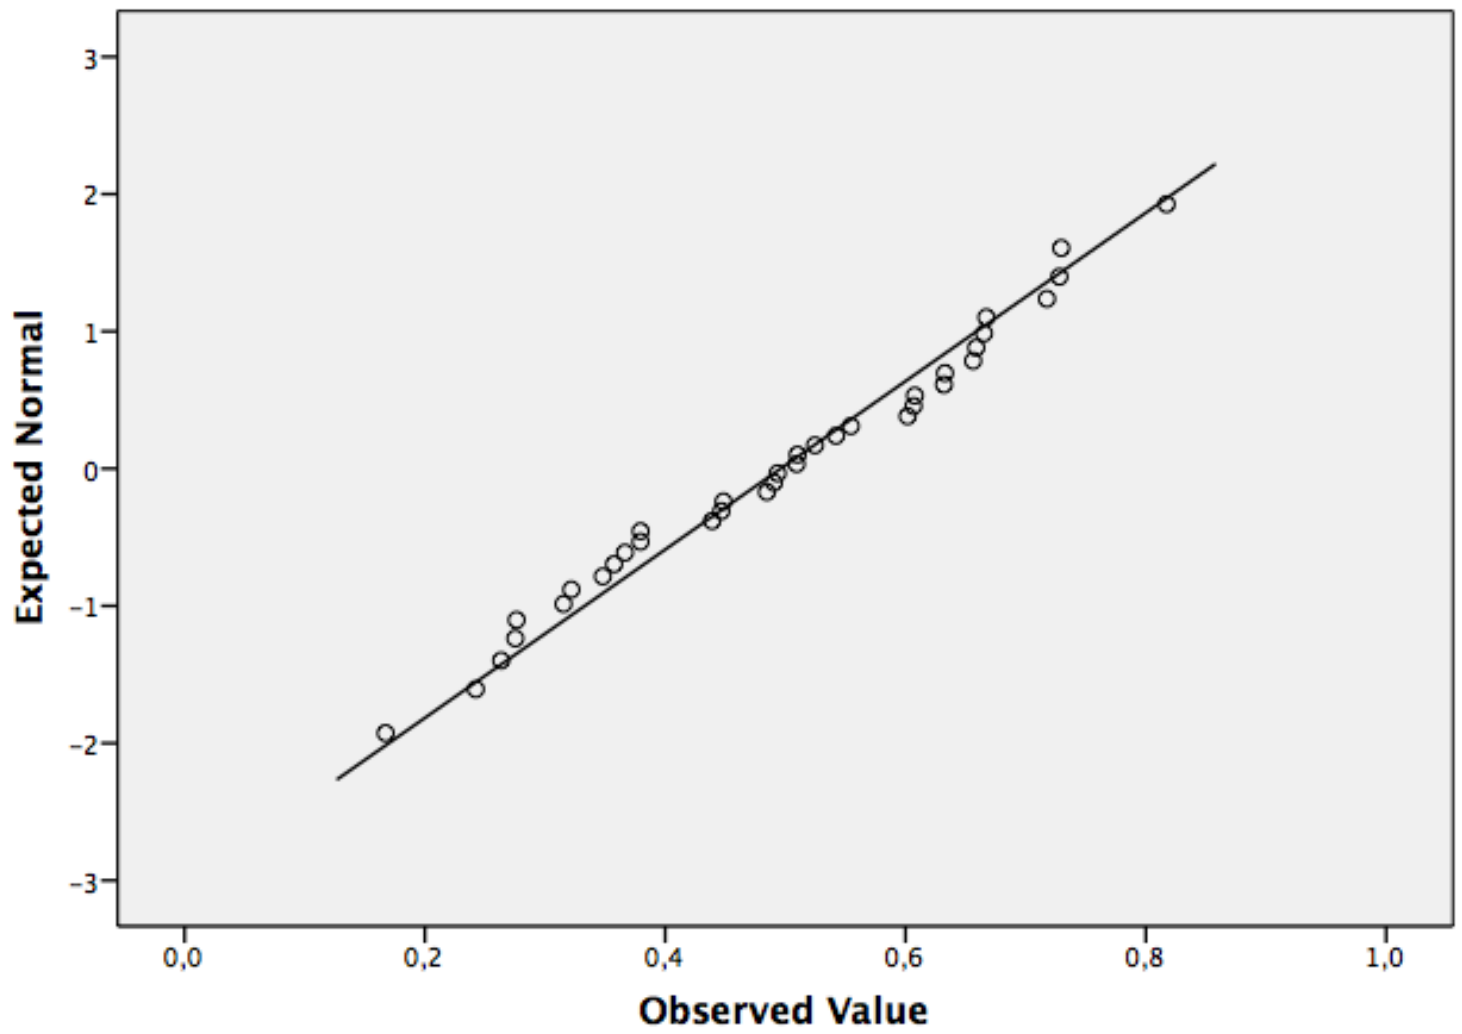

Normal Q-Q Plots

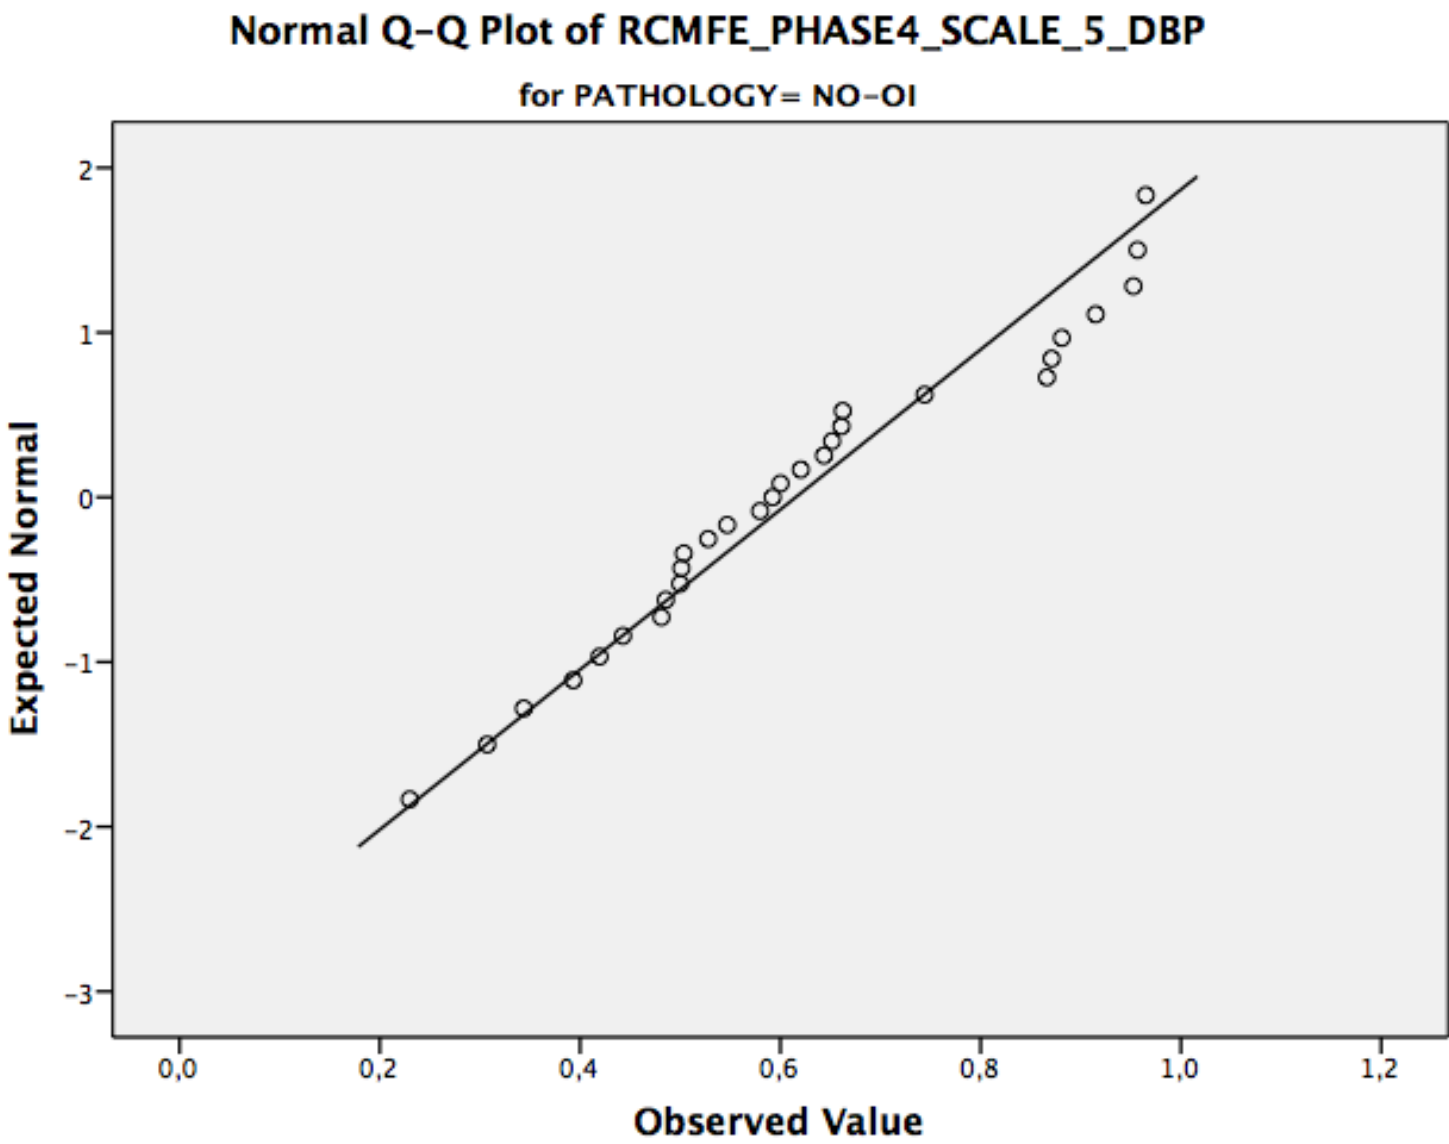

# Normal Q-Q Plot of RCMFE\_PHASE4\_SCALE\_5\_DBP

for PATHOLOGY= OI

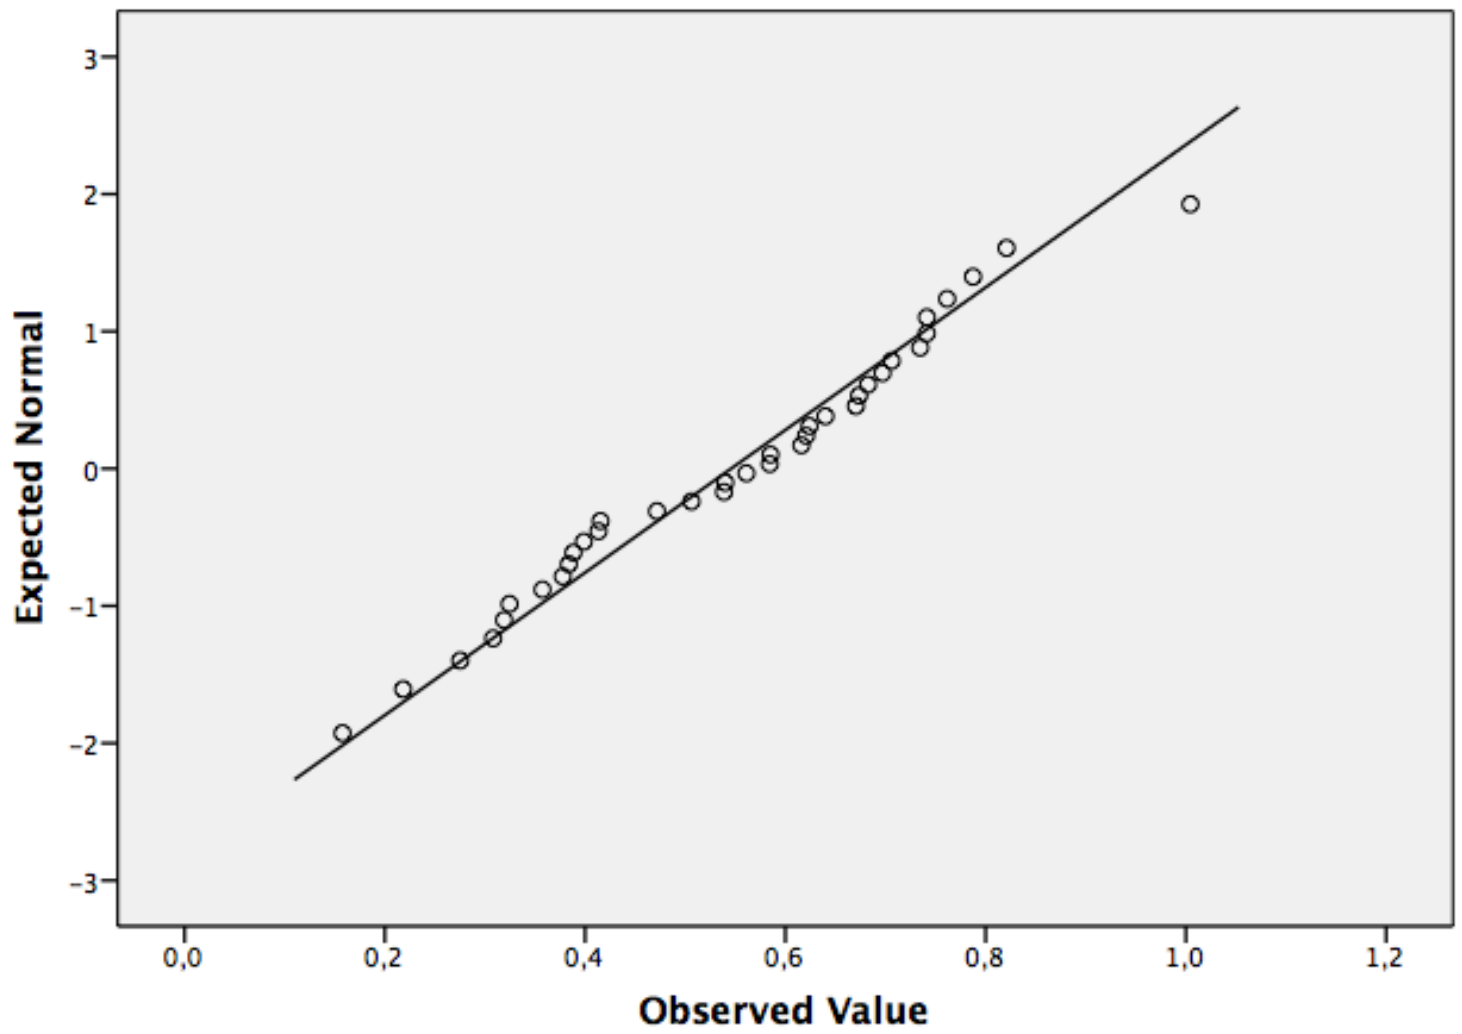

Normal Q-Q Plots

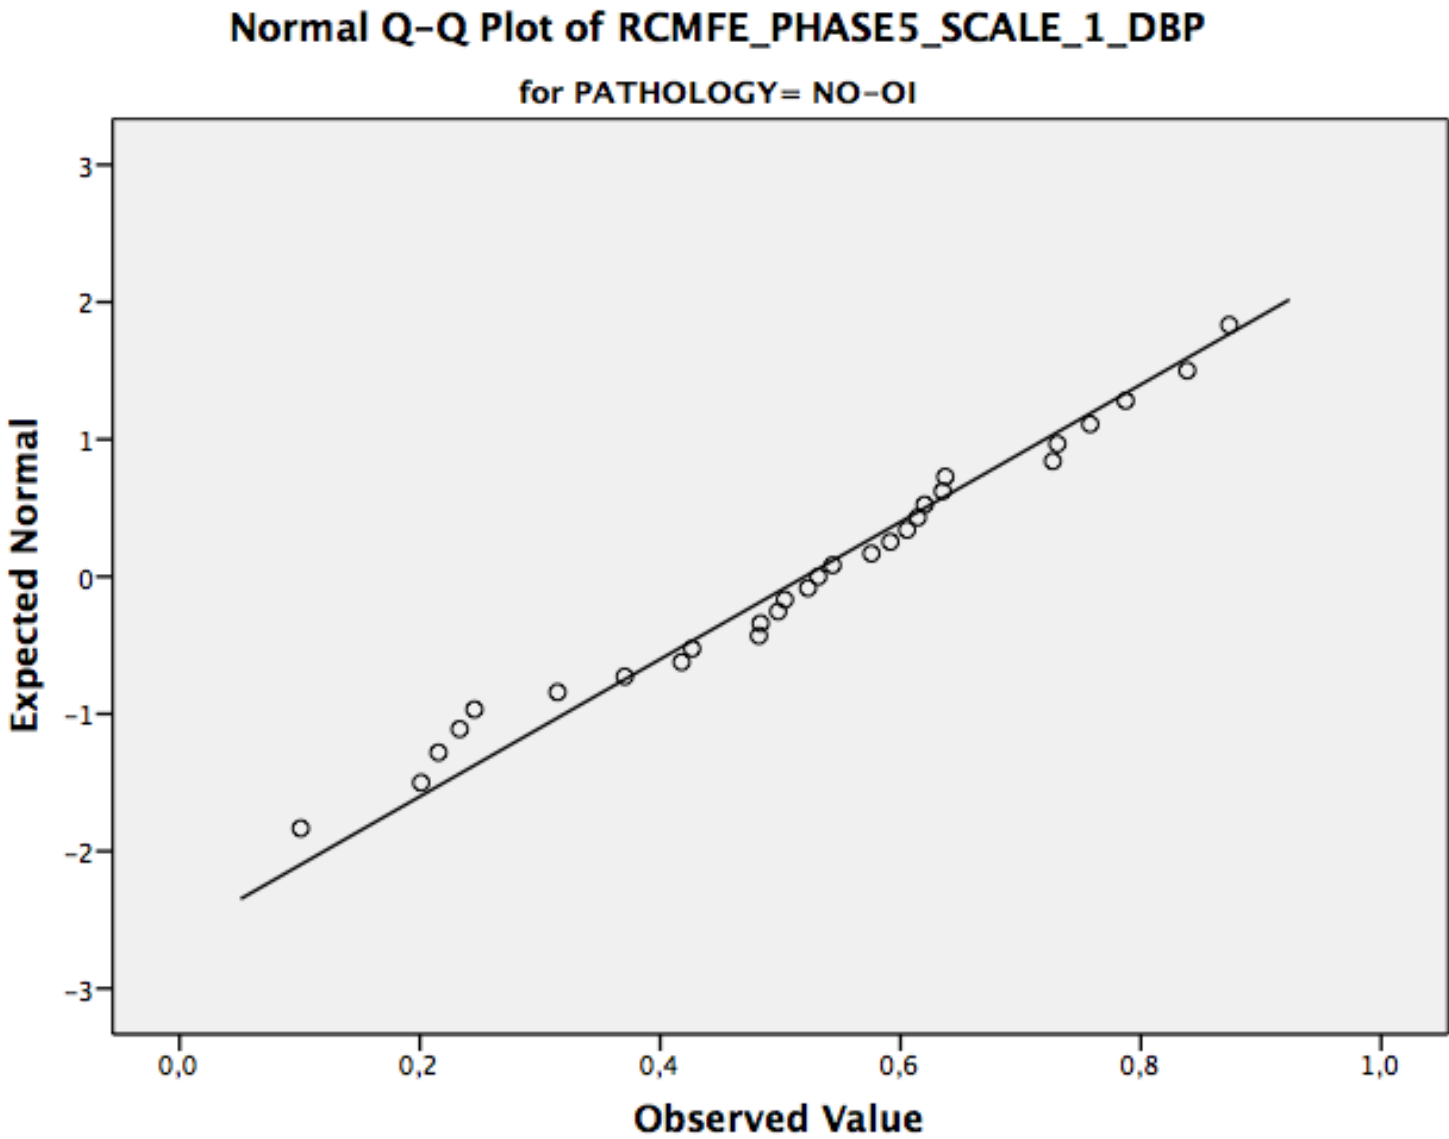

# Normal Q-Q Plot of RCMFE\_PHASE5\_SCALE\_1\_DBP

for PATHOLOGY= OI

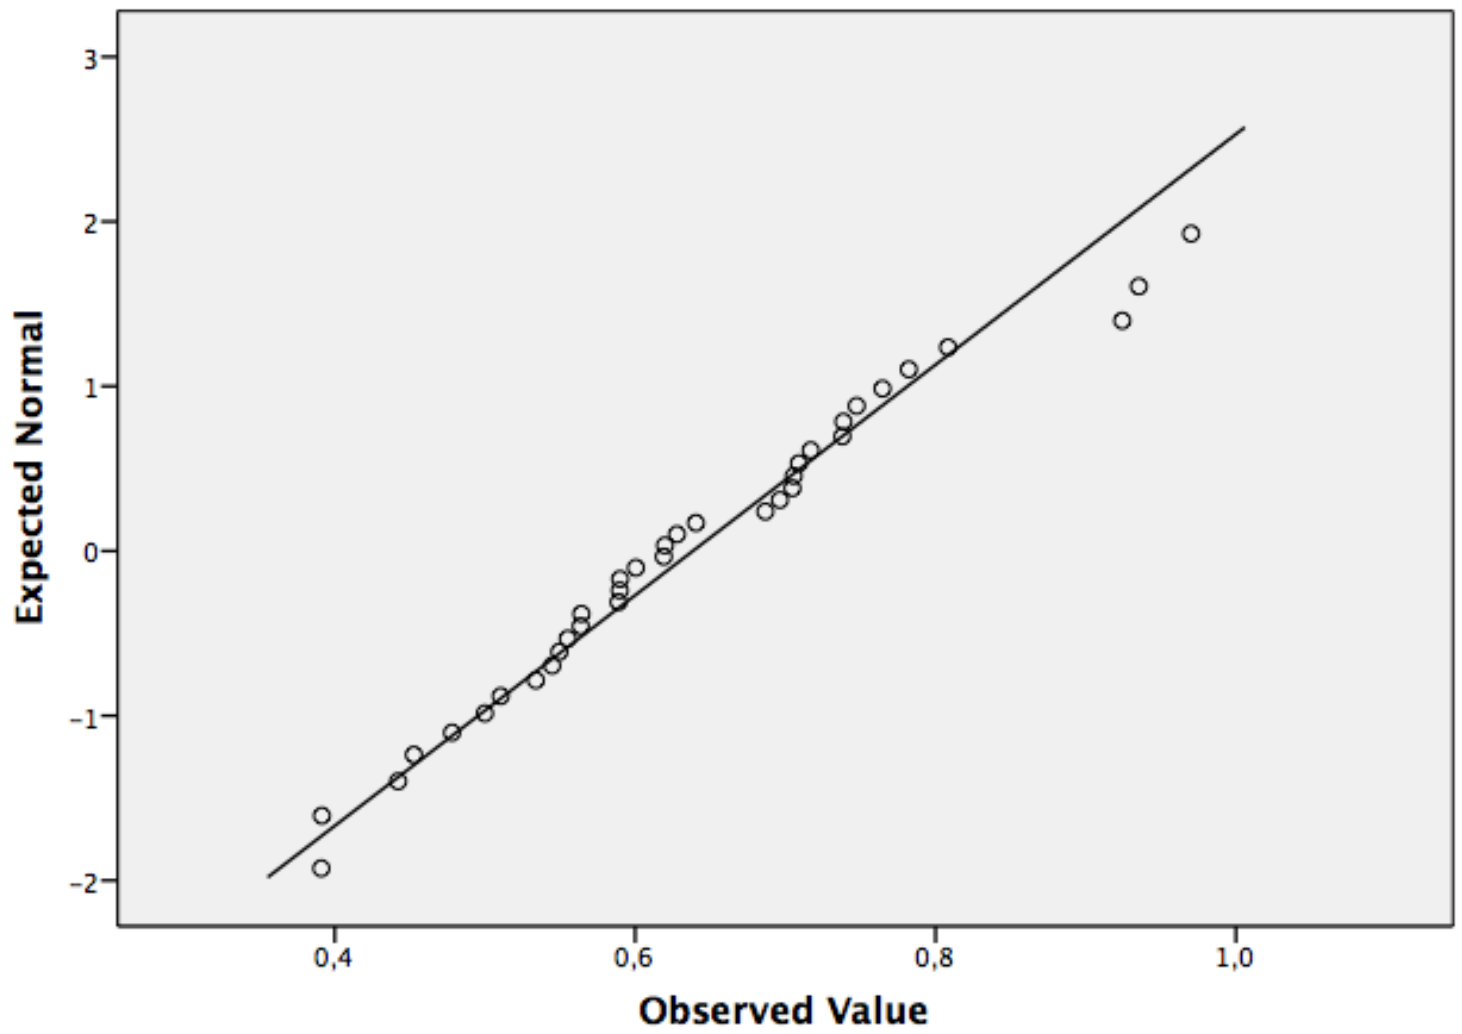



Normal Q-Q Plots

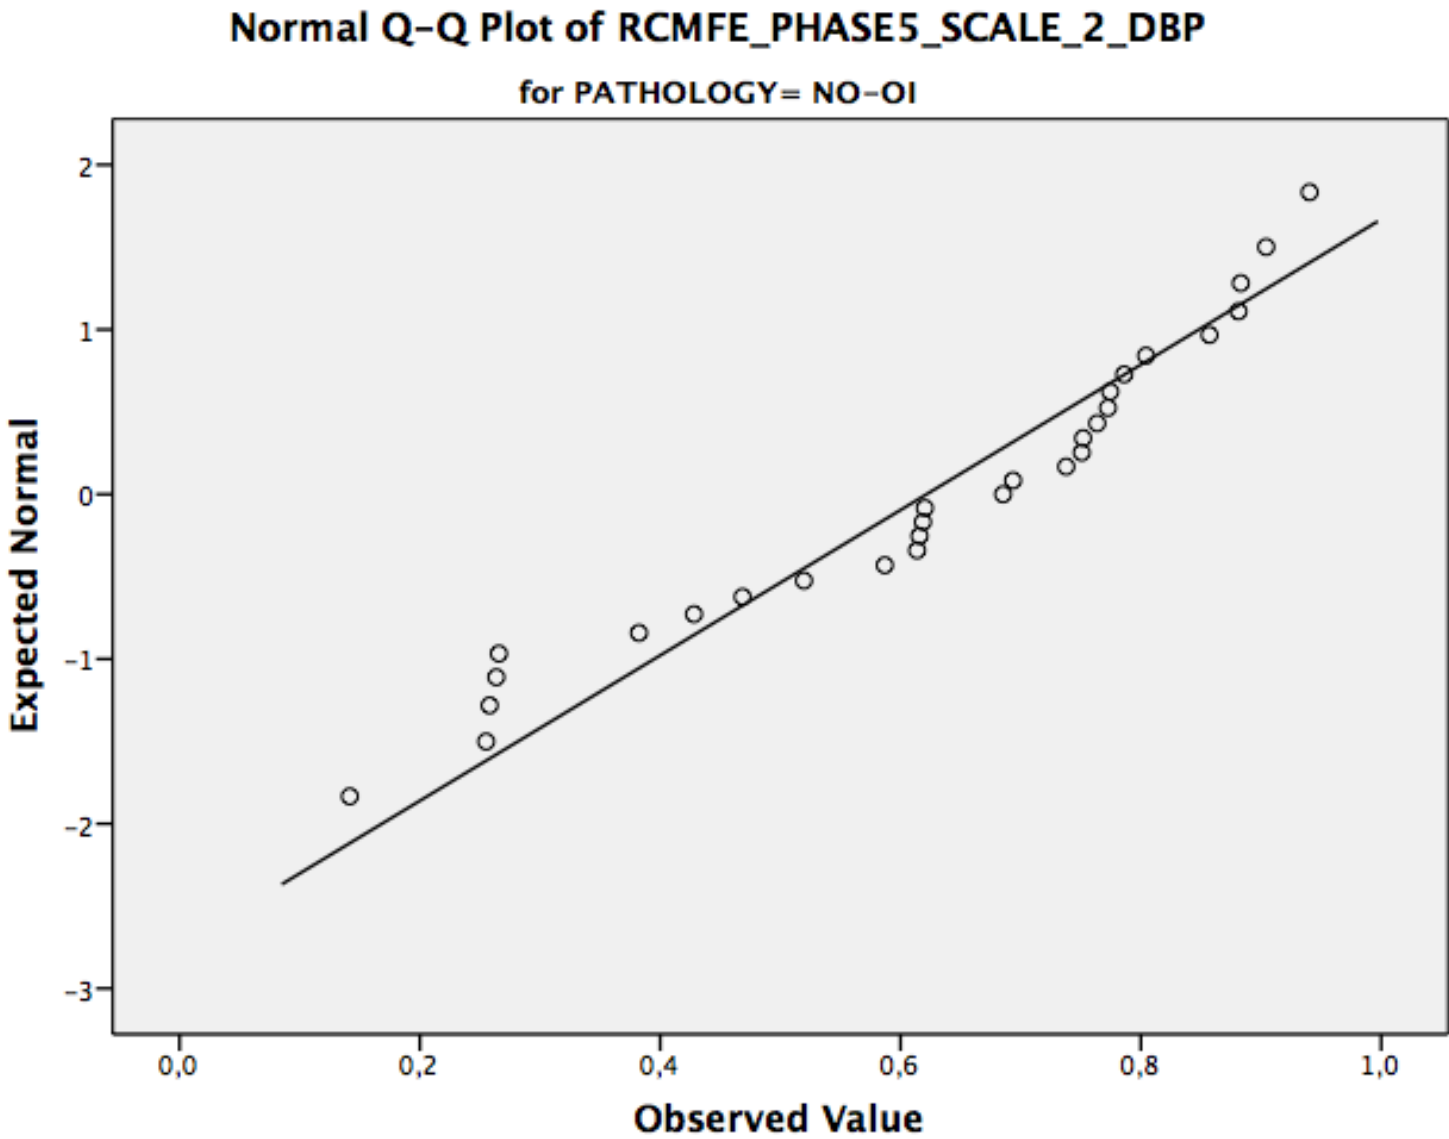

# Normal Q-Q Plot of RCMFE\_PHASE5\_SCALE\_2\_DBP

for PATHOLOGY= OI

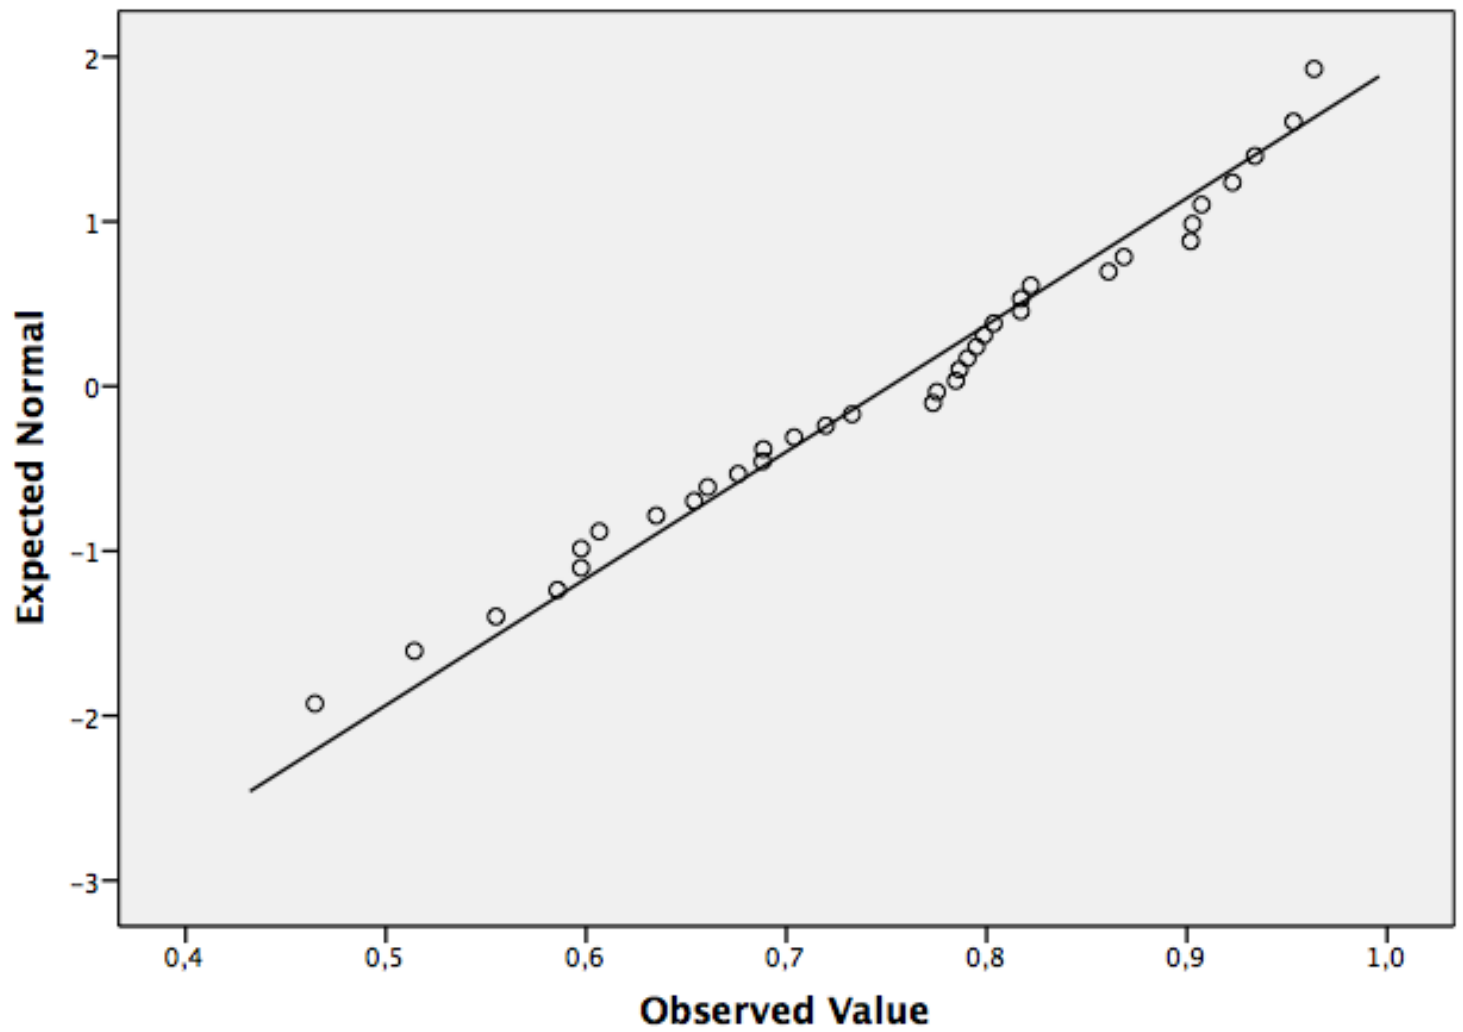

Normal Q-Q Plots

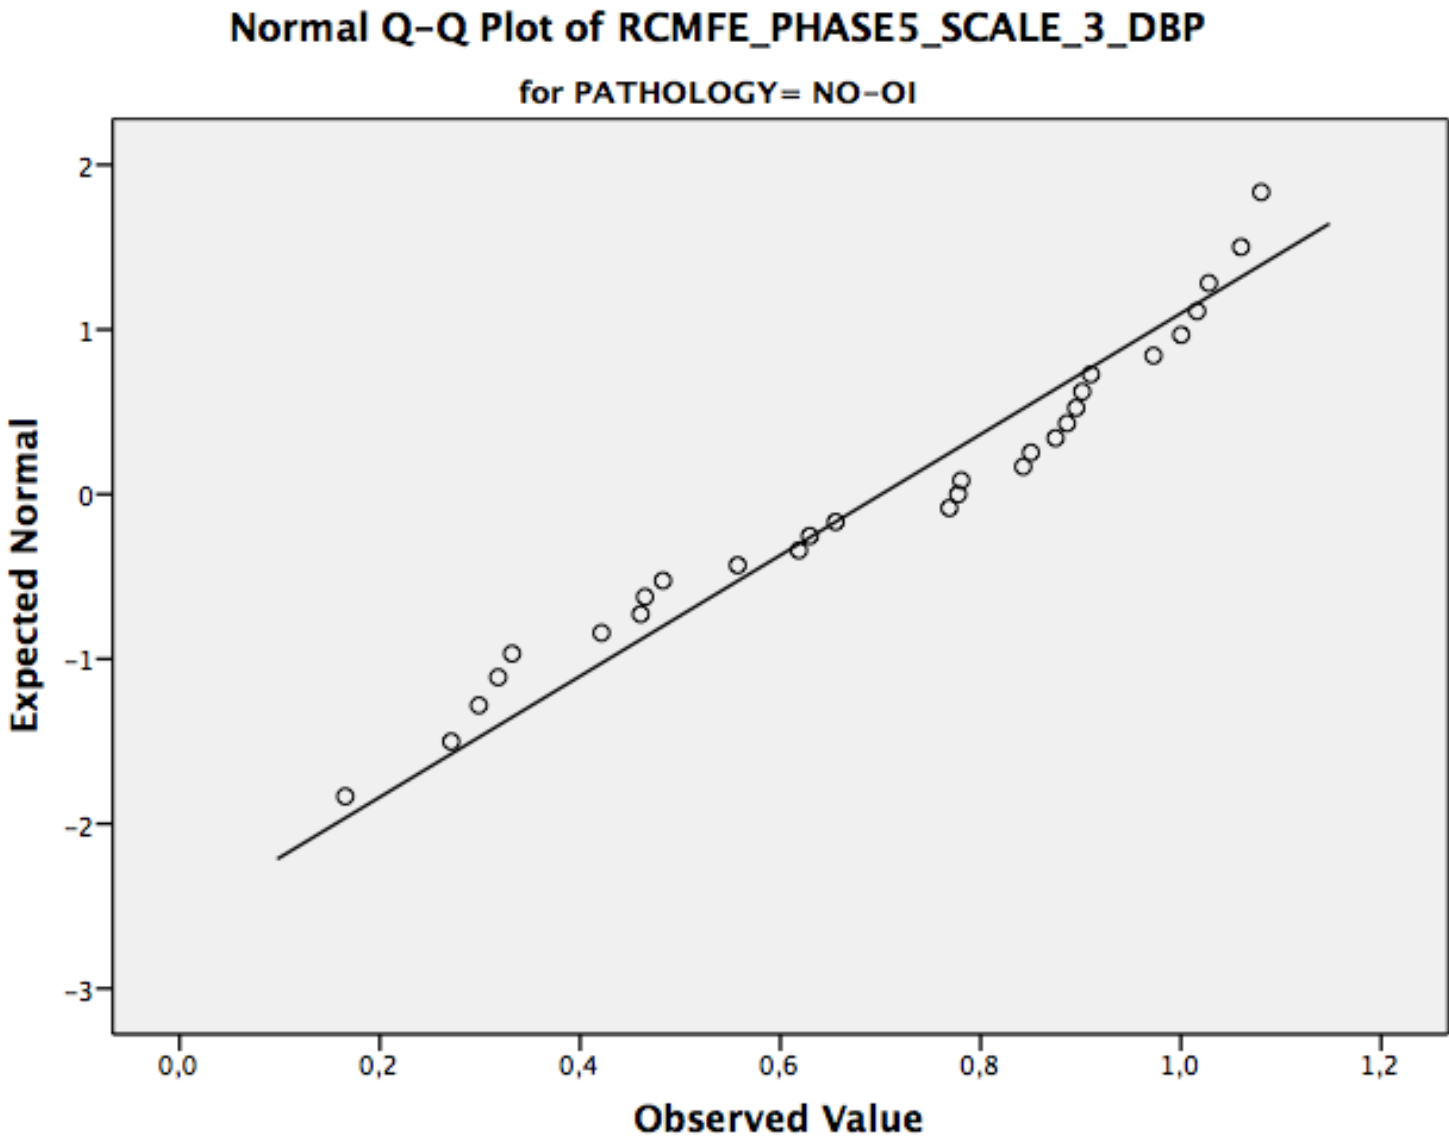

# Normal Q-Q Plot of RCMFE\_PHASE5\_SCALE\_3\_DBP

for PATHOLOGY= OI

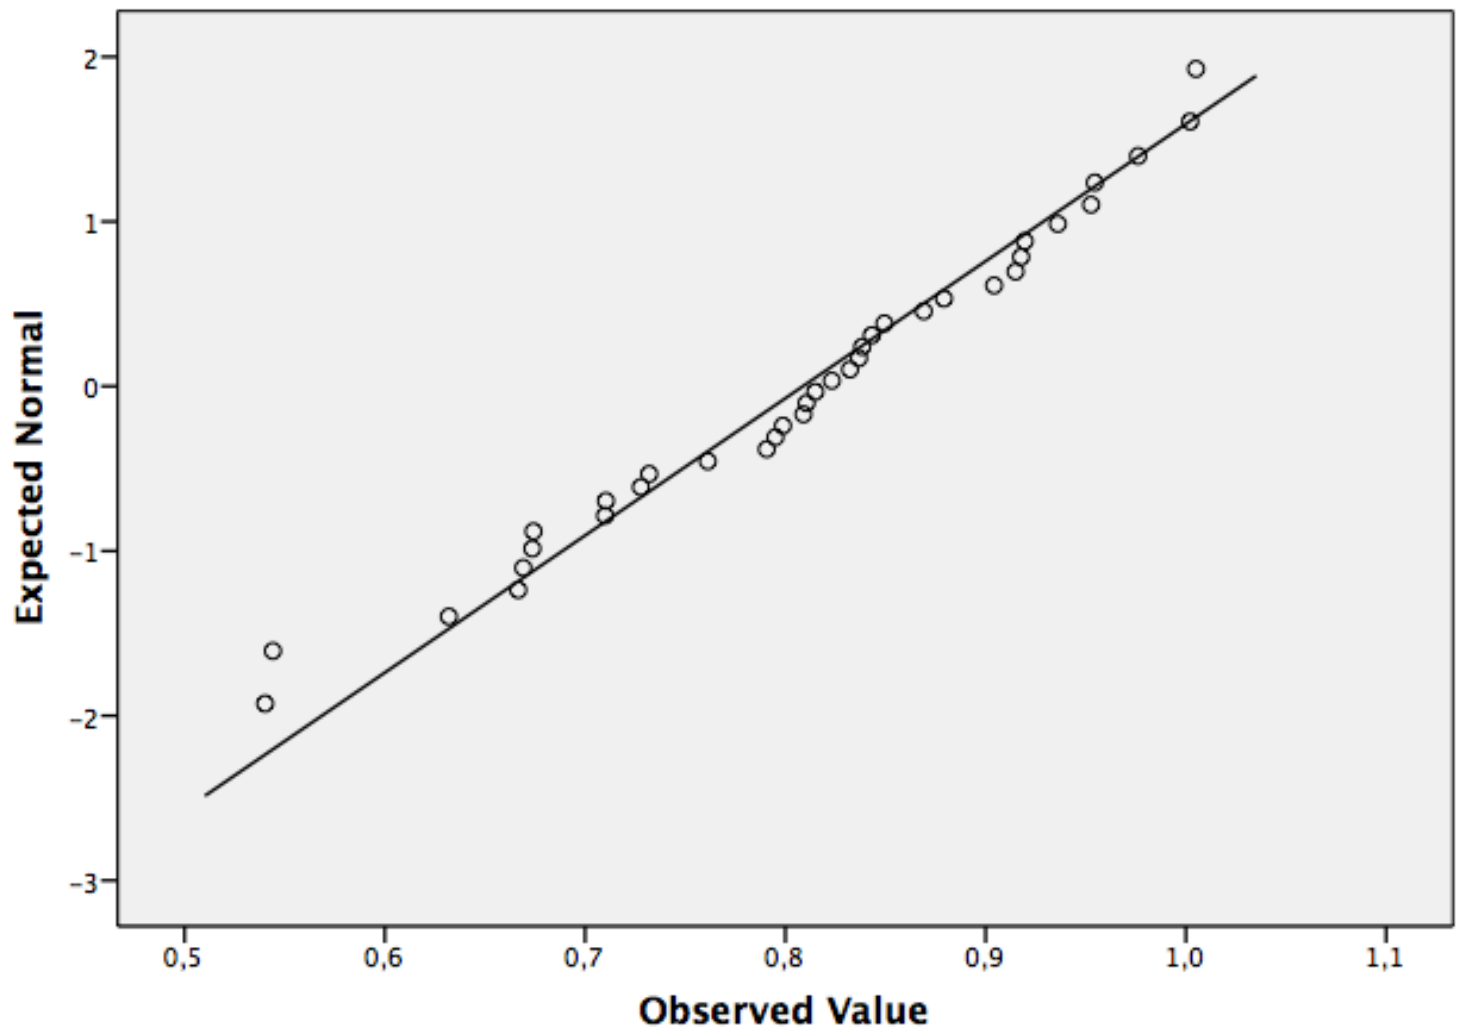

Normal Q-Q Plots

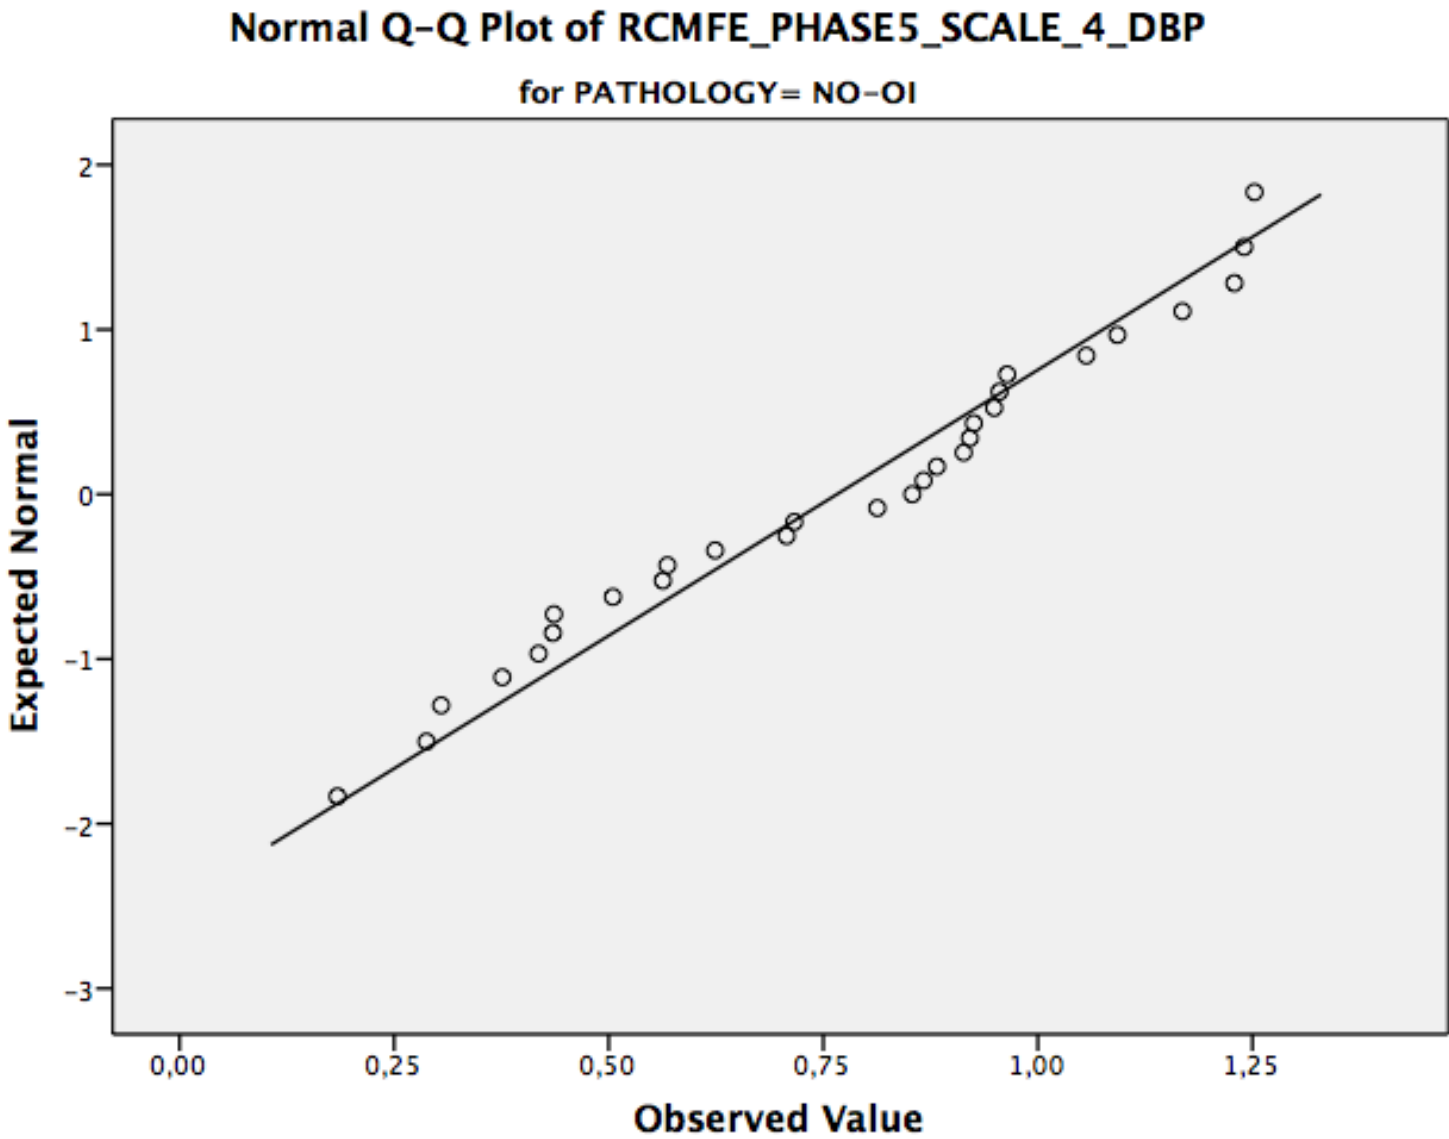

# Normal Q-Q Plot of RCMFE\_PHASE5\_SCALE\_4\_DBP

for PATHOLOGY= OI

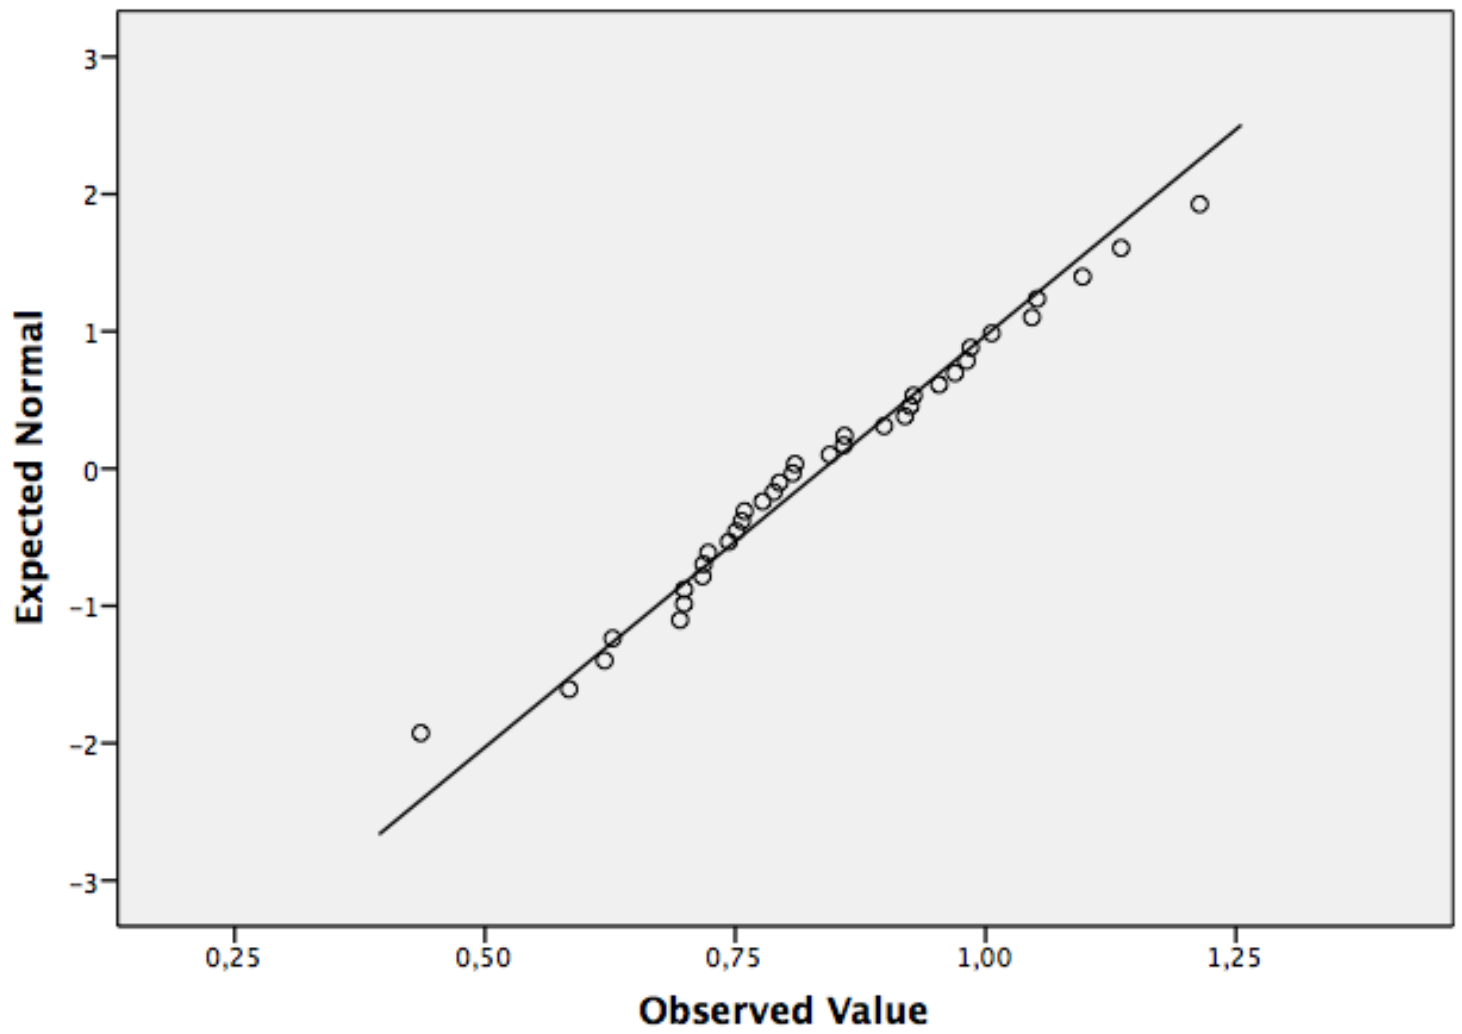

Normal Q-Q Plots

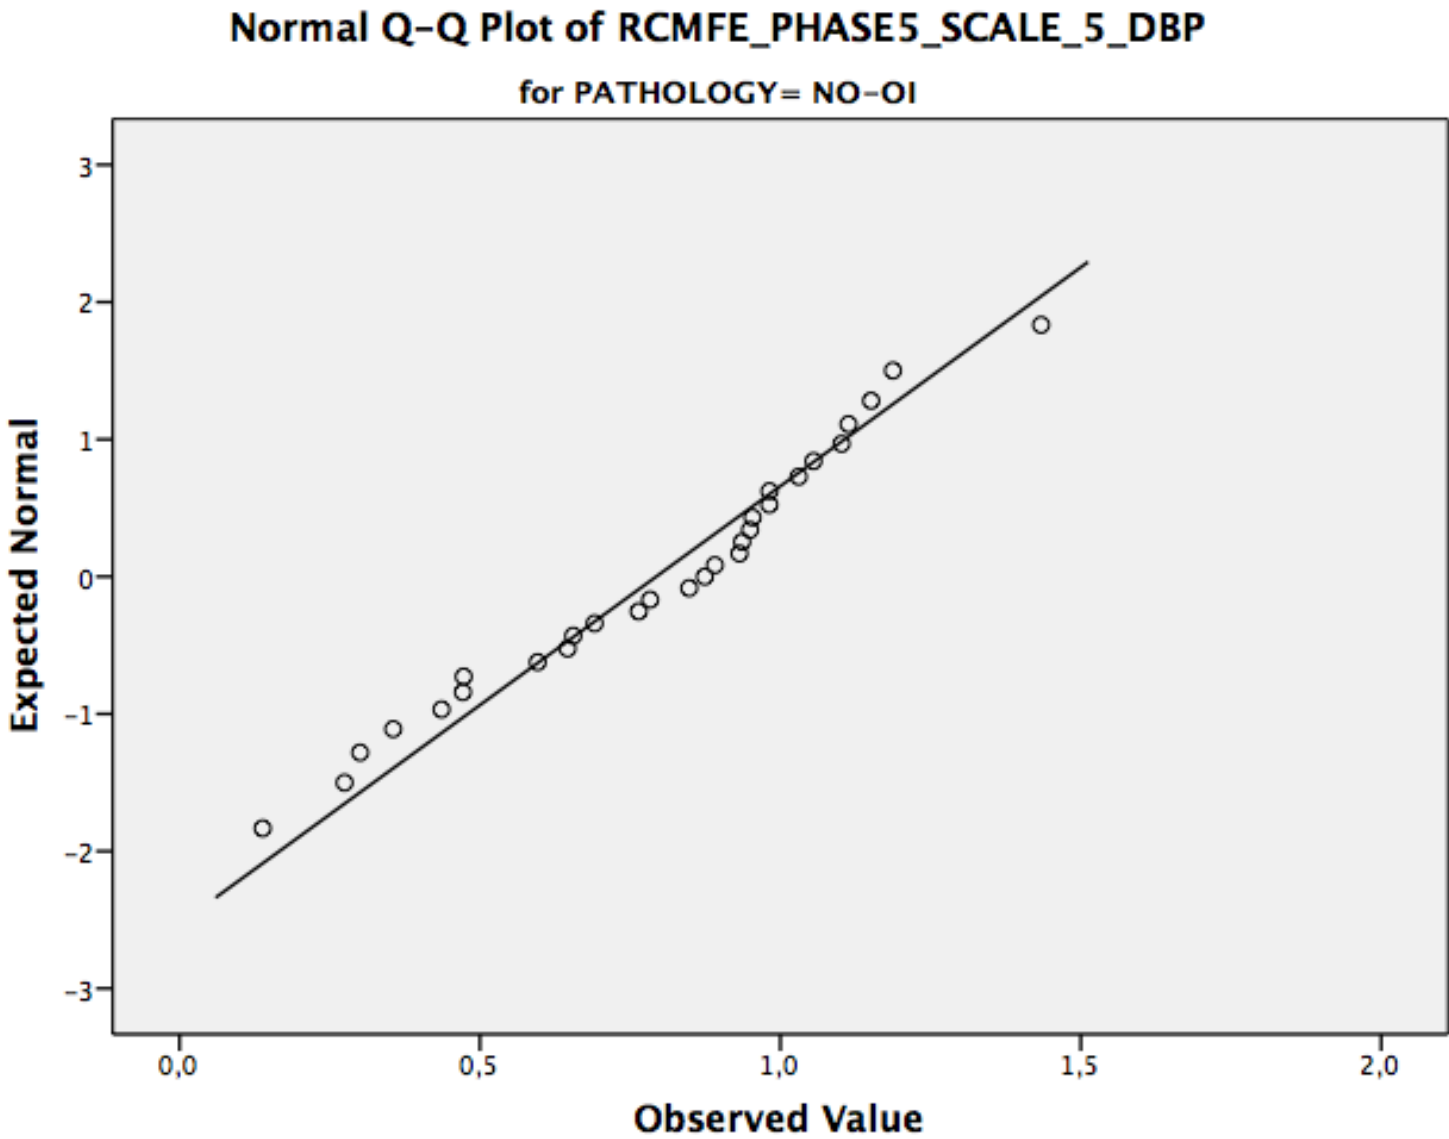

# Normal Q-Q Plot of RCMFE\_PHASE5\_SCALE\_5\_DBP

for PATHOLOGY= OI

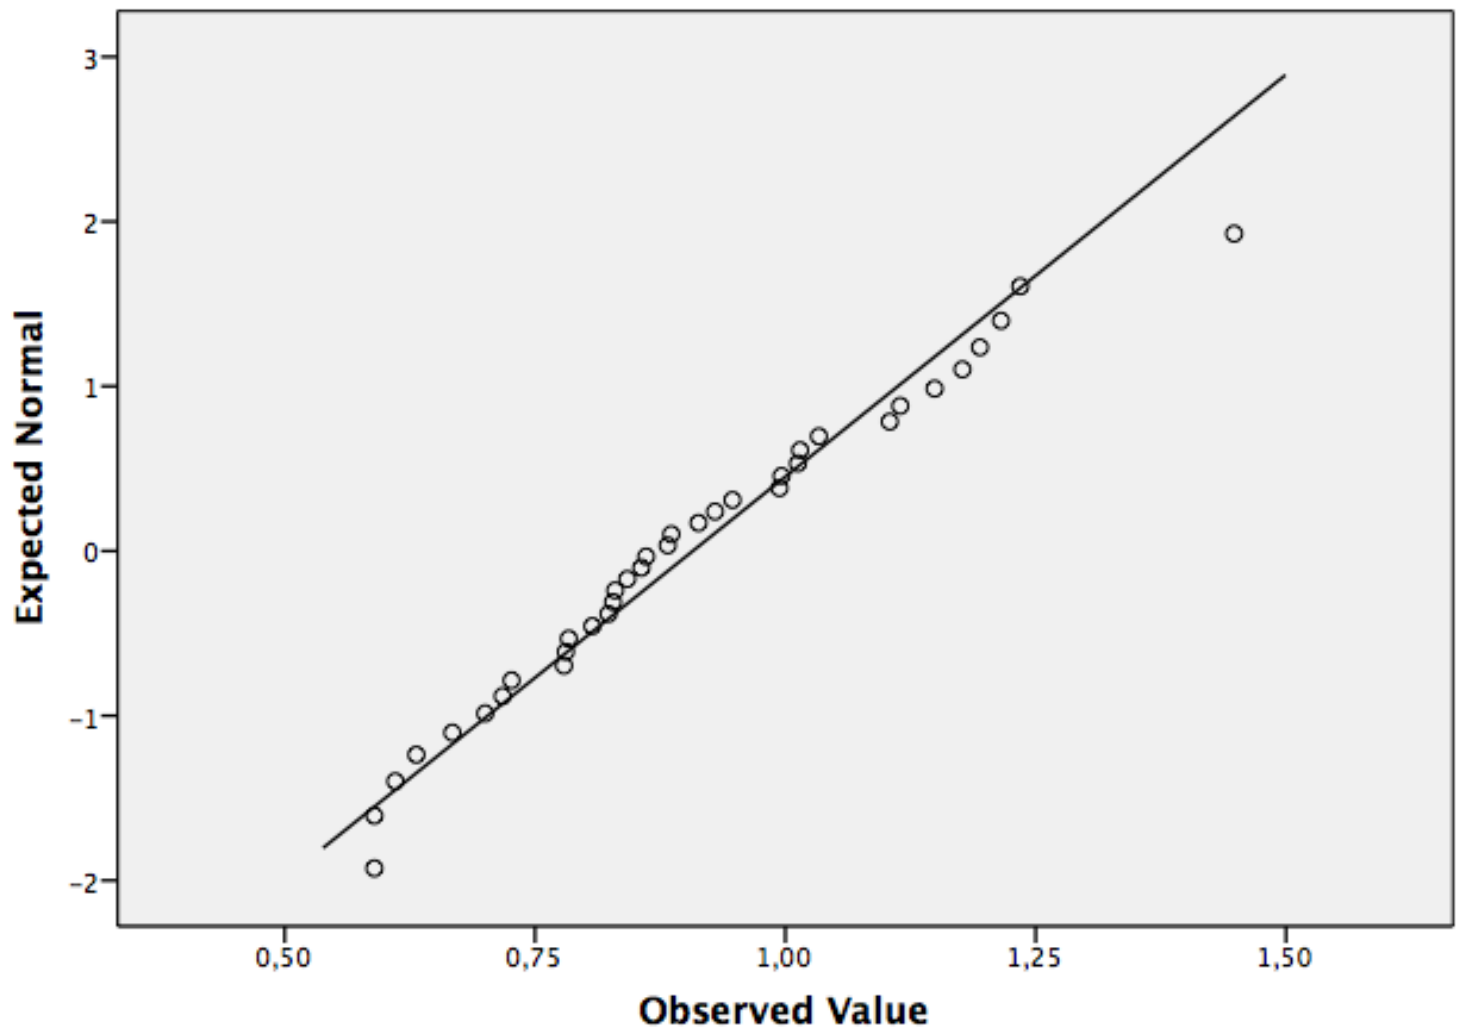



GENDER

Case Processing Summary

| GENDER                |       | Cases |         |         |         |       |         |
|-----------------------|-------|-------|---------|---------|---------|-------|---------|
|                       |       | Valid |         | Missing |         | Total |         |
|                       |       | N     | Percent | N       | Percent | N     | Percent |
| RCMFE_PHASE1_SCALE_1_ | WOMEN | 42    | 100,0%  | 0       | 0,0%    | 42    | 100,0%  |
| TPR                   | MEN   | 23    | 100,0%  | 0       | 0,0%    | 23    | 100,0%  |
| RCMFE_PHASE1_SCALE_2_ | WOMEN | 42    | 100,0%  | 0       | 0,0%    | 42    | 100,0%  |
| TPR                   | MEN   | 23    | 100,0%  | 0       | 0,0%    | 23    | 100,0%  |
| RCMFE_PHASE1_SCALE_3_ | WOMEN | 42    | 100,0%  | 0       | 0,0%    | 42    | 100,0%  |
| TPR                   | MEN   | 23    | 100,0%  | 0       | 0,0%    | 23    | 100,0%  |
| RCMFE_PHASE1_SCALE_4_ | WOMEN | 42    | 100,0%  | 0       | 0,0%    | 42    | 100,0%  |
| TPR                   | MEN   | 23    | 100,0%  | 0       | 0,0%    | 23    | 100,0%  |
| RCMFE_PHASE1_SCALE_5_ | WOMEN | 42    | 100,0%  | 0       | 0,0%    | 42    | 100,0%  |
| TPR                   | MEN   | 23    | 100,0%  | 0       | 0,0%    | 23    | 100,0%  |
| RCMFE_PHASE2_SCALE_1_ | WOMEN | 42    | 100,0%  | 0       | 0,0%    | 42    | 100,0%  |
| TPR                   | MEN   | 23    | 100,0%  | 0       | 0,0%    | 23    | 100,0%  |
| RCMFE_PHASE2_SCALE_2_ | WOMEN | 42    | 100,0%  | 0       | 0,0%    | 42    | 100,0%  |
| TPR                   | MEN   | 23    | 100,0%  | 0       | 0,0%    | 23    | 100,0%  |
| RCMFE_PHASE2_SCALE_3_ | WOMEN | 42    | 100,0%  | 0       | 0,0%    | 42    | 100,0%  |
| TPR                   | MEN   | 23    | 100,0%  | 0       | 0,0%    | 23    | 100,0%  |
| RCMFE_PHASE2_SCALE_4_ | WOMEN | 42    | 100,0%  | 0       | 0,0%    | 42    | 100,0%  |
| TPR                   | MEN   | 23    | 100,0%  | 0       | 0,0%    | 23    | 100,0%  |
| RCMFE_PHASE2_SCALE_5_ | WOMEN | 42    | 100,0%  | 0       | 0,0%    | 42    | 100,0%  |
| TPR                   | MEN   | 23    | 100,0%  | 0       | 0,0%    | 23    | 100,0%  |
| RCMFE_PHASE3_SCALE_1_ | WOMEN | 42    | 100,0%  | 0       | 0,0%    | 42    | 100,0%  |
| TPR                   | MEN   | 23    | 100,0%  | 0       | 0,0%    | 23    | 100,0%  |
| RCMFE_PHASE3_SCALE_2_ | WOMEN | 42    | 100,0%  | 0       | 0,0%    | 42    | 100,0%  |
| TPR                   | MEN   | 23    | 100,0%  | 0       | 0,0%    | 23    | 100,0%  |
| RCMFE_PHASE3_SCALE_3_ | WOMEN | 42    | 100,0%  | 0       | 0,0%    | 42    | 100,0%  |
| TPR                   | MEN   | 23    | 100,0%  | 0       | 0,0%    | 23    | 100,0%  |
| RCMFE_PHASE3_SCALE_4_ | WOMEN | 42    | 100,0%  | 0       | 0,0%    | 42    | 100,0%  |
| TPR                   | MEN   | 23    | 100,0%  | 0       | 0,0%    | 23    | 100,0%  |
| RCMFE_PHASE3_SCALE_5_ | WOMEN | 42    | 100,0%  | 0       | 0,0%    | 42    | 100,0%  |
| TPR                   | MEN   | 23    | 100,0%  | 0       | 0,0%    | 23    | 100,0%  |
| RCMFE_PHASE4_SCALE_1_ | WOMEN | 42    | 100,0%  | 0       | 0,0%    | 42    | 100,0%  |
| TPR                   | MEN   | 23    | 100,0%  | 0       | 0,0%    | 23    | 100,0%  |
| RCMFE_PHASE4_SCALE_2_ | WOMEN | 42    | 100,0%  | 0       | 0,0%    | 42    | 100,0%  |
| TPR                   | MEN   | 23    | 100,0%  | 0       | 0,0%    | 23    | 100,0%  |
| RCMFE_PHASE4_SCALE_3_ | WOMEN | 42    | 100,0%  | 0       | 0,0%    | 42    | 100,0%  |
| TPR                   | MEN   | 23    | 100,0%  | 0       | 0,0%    | 23    | 100,0%  |
| RCMFE_PHASE4_SCALE_4_ | WOMEN | 42    | 100,0%  | 0       | 0,0%    | 42    | 100,0%  |
| TPR                   | MEN   | 23    | 100,0%  | 0       | 0,0%    | 23    | 100,0%  |
| RCMFE_PHASE4_SCALE_5_ | WOMEN | 42    | 100,0%  | 0       | 0,0%    | 42    | 100,0%  |
| TPR                   | MEN   | 23    | 100,0%  | 0       | 0,0%    | 23    | 100,0%  |
| RCMFE_PHASE5_SCALE_1_ | WOMEN | 42    | 100,0%  | 0       | 0,0%    | 42    | 100,0%  |
| TPR                   |       |       |         |         |         |       |         |

### Case Processing Summary

| GENDER                |       | Cases |         |         |         |       |         |
|-----------------------|-------|-------|---------|---------|---------|-------|---------|
|                       |       | Valid |         | Missing |         | Total |         |
|                       |       | N     | Percent | N       | Percent | N     | Percent |
| RCMFE_PHASE5_SCALE_1_ | MEN   | 23    | 100,0%  | 0       | 0,0%    | 23    | 100,0%  |
| TPR                   |       |       |         |         |         |       |         |
| RCMFE_PHASE5_SCALE_2_ | WOMEN | 42    | 100,0%  | 0       | 0,0%    | 42    | 100,0%  |
| TPR                   |       |       |         |         |         |       |         |
|                       | MEN   | 23    | 100,0%  | 0       | 0,0%    | 23    | 100,0%  |
| RCMFE_PHASE5_SCALE_3_ | WOMEN | 42    | 100,0%  | 0       | 0,0%    | 42    | 100,0%  |
| TPR                   |       |       |         |         |         |       |         |
|                       | MEN   | 23    | 100,0%  | 0       | 0,0%    | 23    | 100,0%  |
| RCMFE_PHASE5_SCALE_4_ | WOMEN | 42    | 100,0%  | 0       | 0,0%    | 42    | 100,0%  |
| TPR                   |       |       |         |         |         |       |         |
|                       | MEN   | 23    | 100,0%  | 0       | 0,0%    | 23    | 100,0%  |
| RCMFE_PHASE5_SCALE_5_ | WOMEN | 42    | 100,0%  | 0       | 0,0%    | 42    | 100,0%  |
| TPR                   |       |       |         |         |         |       |         |
|                       | MEN   | 23    | 100,0%  | 0       | 0,0%    | 23    | 100,0%  |

### Tests of Normality

| GENDER                |       | Kolmogorov-Smirnov <sup>a</sup> |    |       | Shapiro-Wilk |    |      |
|-----------------------|-------|---------------------------------|----|-------|--------------|----|------|
|                       |       | Statistic                       | df | Sig.  | Statistic    | df | Sig. |
| RCMFE_PHASE1_SCALE_1_ | WOMEN | ,080                            | 42 | ,200* | ,973         | 42 | ,423 |
| TPR                   |       |                                 |    |       |              |    |      |
|                       | MEN   | ,184                            | 23 | ,053  | ,893         | 23 | ,018 |
| RCMFE_PHASE1_SCALE_2_ | WOMEN | ,080                            | 42 | ,200* | ,978         | 42 | ,600 |
| TPR                   |       |                                 |    |       |              |    |      |
|                       | MEN   | ,140                            | 23 | ,200* | ,955         | 23 | ,362 |
| RCMFE_PHASE1_SCALE_3_ | WOMEN | ,089                            | 42 | ,200* | ,984         | 42 | ,799 |
| TPR                   |       |                                 |    |       |              |    |      |
|                       | MEN   | ,153                            | 23 | ,172  | ,955         | 23 | ,378 |
| RCMFE_PHASE1_SCALE_4_ | WOMEN | ,094                            | 42 | ,200* | ,964         | 42 | ,208 |
| TPR                   |       |                                 |    |       |              |    |      |
|                       | MEN   | ,133                            | 23 | ,200* | ,967         | 23 | ,609 |
| RCMFE_PHASE1_SCALE_5_ | WOMEN | ,064                            | 42 | ,200* | ,991         | 42 | ,986 |
| TPR                   |       |                                 |    |       |              |    |      |
|                       | MEN   | ,133                            | 23 | ,200* | ,969         | 23 | ,668 |
| RCMFE_PHASE2_SCALE_1_ | WOMEN | ,090                            | 42 | ,200* | ,969         | 42 | ,299 |
| TPR                   |       |                                 |    |       |              |    |      |
|                       | MEN   | ,140                            | 23 | ,200* | ,930         | 23 | ,111 |
| RCMFE_PHASE2_SCALE_2_ | WOMEN | ,071                            | 42 | ,200* | ,969         | 42 | ,302 |
| TPR                   |       |                                 |    |       |              |    |      |
|                       | MEN   | ,119                            | 23 | ,200* | ,947         | 23 | ,255 |
| RCMFE_PHASE2_SCALE_3_ | WOMEN | ,136                            | 42 | ,049  | ,957         | 42 | ,116 |
| TPR                   |       |                                 |    |       |              |    |      |
|                       | MEN   | ,143                            | 23 | ,200* | ,936         | 23 | ,151 |
| RCMFE_PHASE2_SCALE_4_ | WOMEN | ,126                            | 42 | ,093  | ,953         | 42 | ,086 |
| TPR                   |       |                                 |    |       |              |    |      |
|                       | MEN   | ,159                            | 23 | ,139  | ,923         | 23 | ,079 |
| RCMFE_PHASE2_SCALE_5_ | WOMEN | ,091                            | 42 | ,200* | ,936         | 42 | ,021 |
| TPR                   |       |                                 |    |       |              |    |      |
|                       | MEN   | ,142                            | 23 | ,200* | ,919         | 23 | ,064 |
| RCMFE_PHASE3_SCALE_1_ | WOMEN | ,105                            | 42 | ,200* | ,959         | 42 | ,139 |
| TPR                   |       |                                 |    |       |              |    |      |
|                       | MEN   | ,156                            | 23 | ,151  | ,950         | 23 | ,290 |
| RCMFE_PHASE3_SCALE_2_ | WOMEN | ,067                            | 42 | ,200* | ,970         | 42 | ,321 |
| TPR                   |       |                                 |    |       |              |    |      |
|                       | MEN   | ,132                            | 23 | ,200* | ,956         | 23 | ,385 |
| RCMFE_PHASE3_SCALE_3_ | WOMEN | ,094                            | 42 | ,200* | ,972         | 42 | ,370 |
| TPR                   |       |                                 |    |       |              |    |      |
|                       | MEN   | ,166                            | 23 | ,100  | ,956         | 23 | ,393 |
| RCMFE_PHASE3_SCALE_4_ | WOMEN | ,082                            | 42 | ,200* | ,981         | 42 | ,692 |
| TPR                   |       |                                 |    |       |              |    |      |
|                       | MEN   | ,178                            | 23 | ,056  | ,958         | 23 | ,432 |
| RCMFE_PHASE3_SCALE_5_ | WOMEN | ,068                            | 42 | ,200* | ,981         | 42 | ,681 |

|                       |       |      |    |       |      |    |      |
|-----------------------|-------|------|----|-------|------|----|------|
| TPR                   | MEN   | ,106 | 23 | ,200* | ,962 | 23 | ,498 |
| RCMFE_PHASE4_SCALE_1_ | WOMEN | ,242 | 42 | ,080  | ,716 | 42 | ,090 |
| TPR                   | MEN   | ,118 | 23 | ,200* | ,973 | 23 | ,757 |
| RCMFE_PHASE4_SCALE_2_ | WOMEN | ,219 | 42 | ,088  | ,777 | 42 | ,090 |
| TPR                   | MEN   | ,098 | 23 | ,200* | ,928 | 23 | ,099 |
| RCMFE_PHASE4_SCALE_3_ | WOMEN | ,236 | 42 | ,080  | ,795 | 42 | ,050 |
|                       | MEN   | ,120 | 23 | ,200* | ,934 | 23 | ,133 |
| RCMFE_PHASE4_SCALE_4_ | WOMEN | ,197 | 42 | ,045  | ,879 | 42 | ,055 |
| TPR                   | MEN   | ,165 | 23 | ,103  | ,916 | 23 | ,055 |
| RCMFE_PHASE4_SCALE_5_ | WOMEN | ,224 | 42 | ,030  | ,823 | 42 | ,070 |
| TPR                   | MEN   | ,156 | 23 | ,155  | ,898 | 23 | ,023 |
| RCMFE_PHASE5_SCALE_1_ | WOMEN | ,119 | 42 | ,147  | ,965 | 42 | ,218 |
| TPR                   | MEN   | ,101 | 23 | ,200* | ,968 | 23 | ,647 |

#### Tests of Normality

| GENDER                      | Kolmogorov-Smirnov <sup>a</sup> |    |       | Shapiro-Wilk |    |      |
|-----------------------------|---------------------------------|----|-------|--------------|----|------|
|                             | Statistic                       | df | Sig.  | Statistic    | df | Sig. |
| RCMFE_PHASE5_SCALE_2_ WOMEN | ,063                            | 42 | ,200* | ,974         | 42 | ,440 |
| TPR MEN                     | ,113                            | 23 | ,200  | ,937         | 23 | ,154 |
| RCMFE_PHASE5_SCALE_3_ WOMEN | ,061                            | 42 | ,200* | ,982         | 42 | ,735 |
| TPR MEN                     | ,118                            | 23 | ,200* | ,939         | 23 | ,175 |
| RCMFE_PHASE5_SCALE_4_ WOMEN | ,120                            | 42 | ,135* | ,975         | 42 | ,472 |
| TPR MEN                     | ,129                            | 23 | ,200  | ,928         | 23 | ,098 |
| RCMFE_PHASE5_SCALE_5_ WOMEN | ,102                            | 42 | ,200* | ,961         | 42 | ,155 |
| TPR MEN                     | ,146                            | 23 | ,200* | ,906         | 23 | ,053 |

\*. This is a lower bound of the true significance.

a. Lilliefors Significance Correction

Normal Q-Q Plots

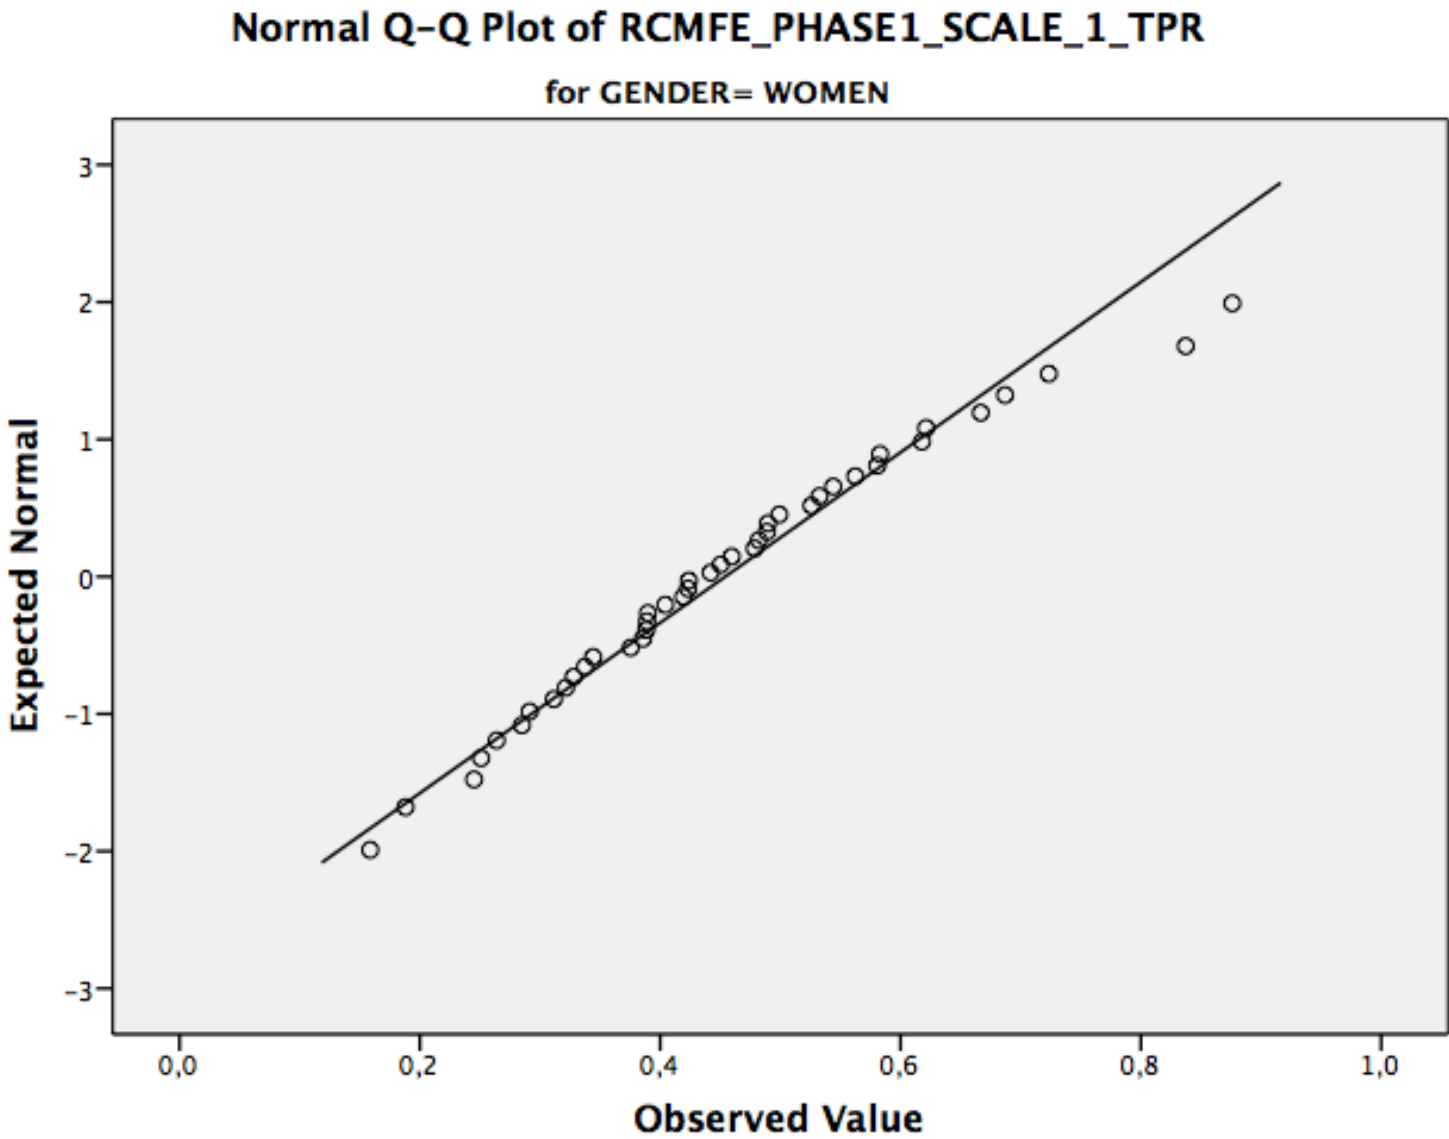

# Normal Q-Q Plot of RCMFE\_PHASE1\_SCALE\_1\_TPR

for GENDER= MEN

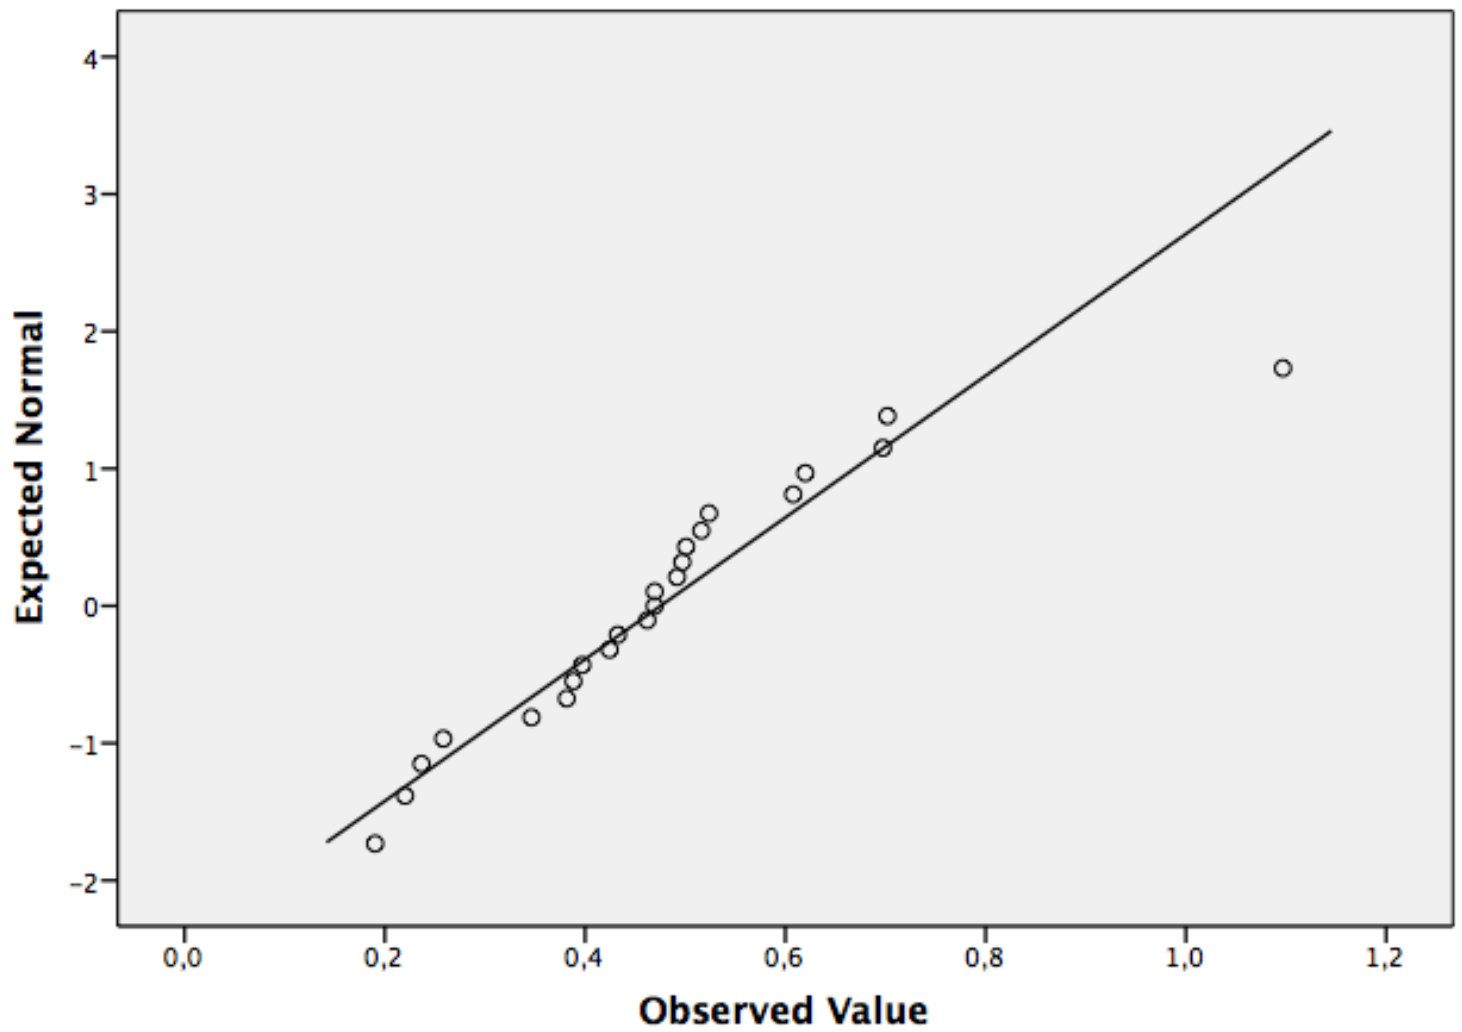

## Normal Q-Q Plots

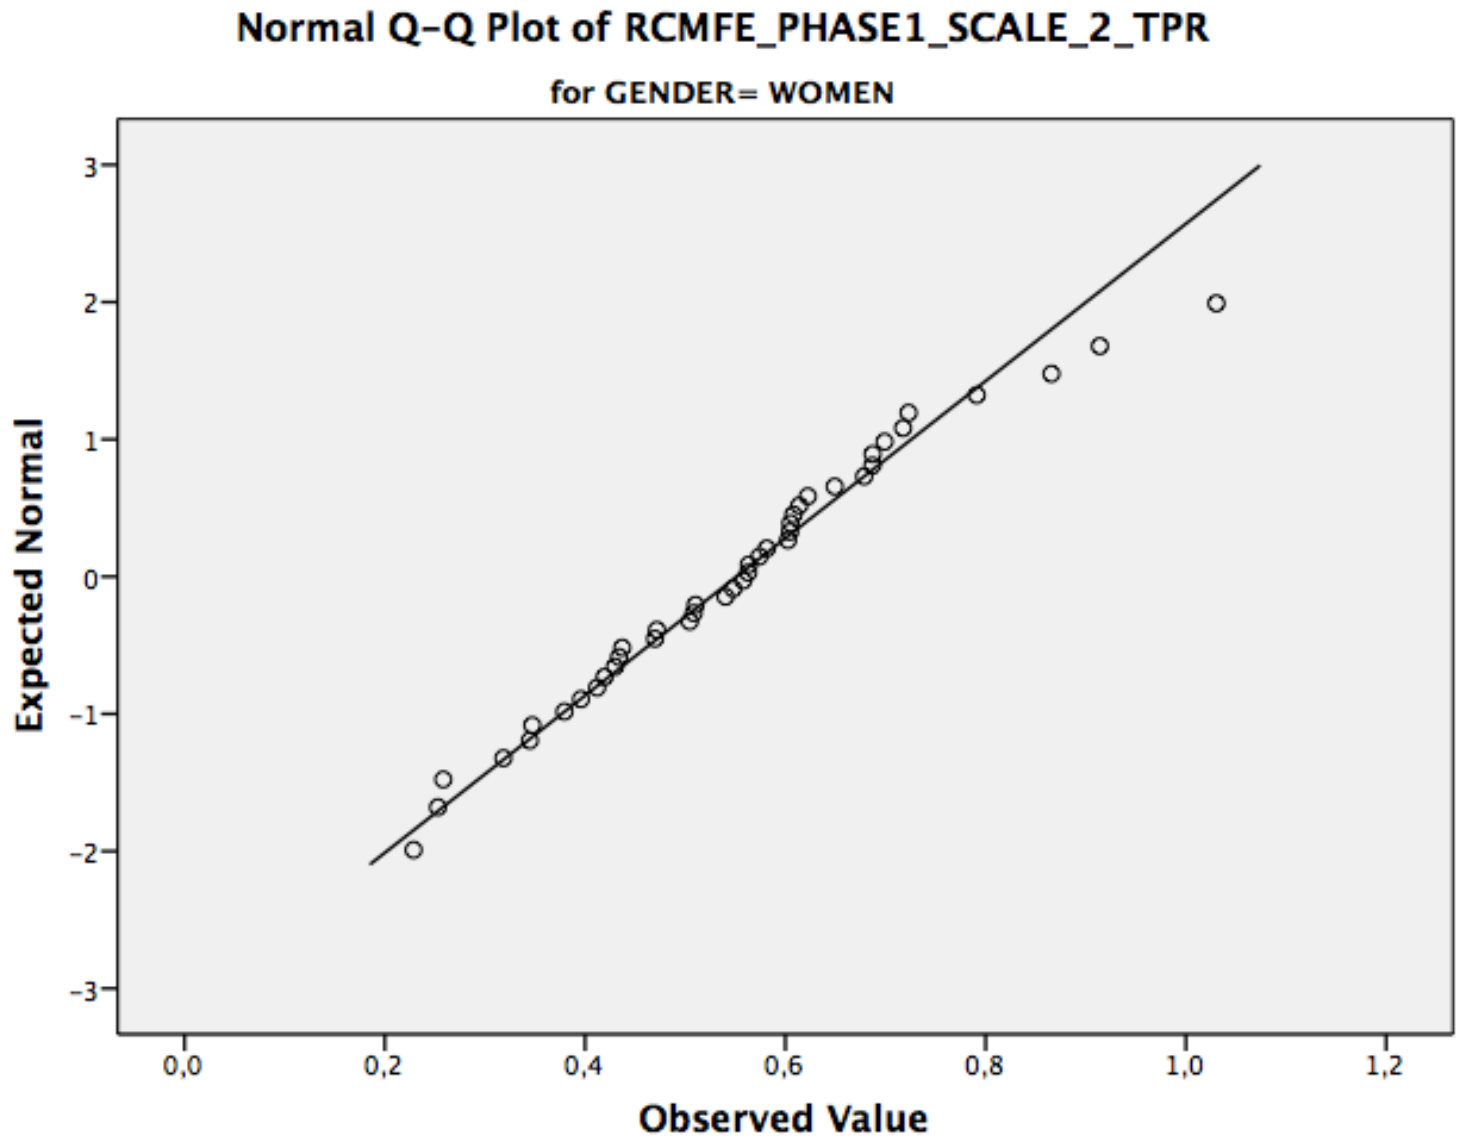

# Normal Q-Q Plot of RCMFE\_PHASE1\_SCALE\_2\_TPR

for GENDER= MEN

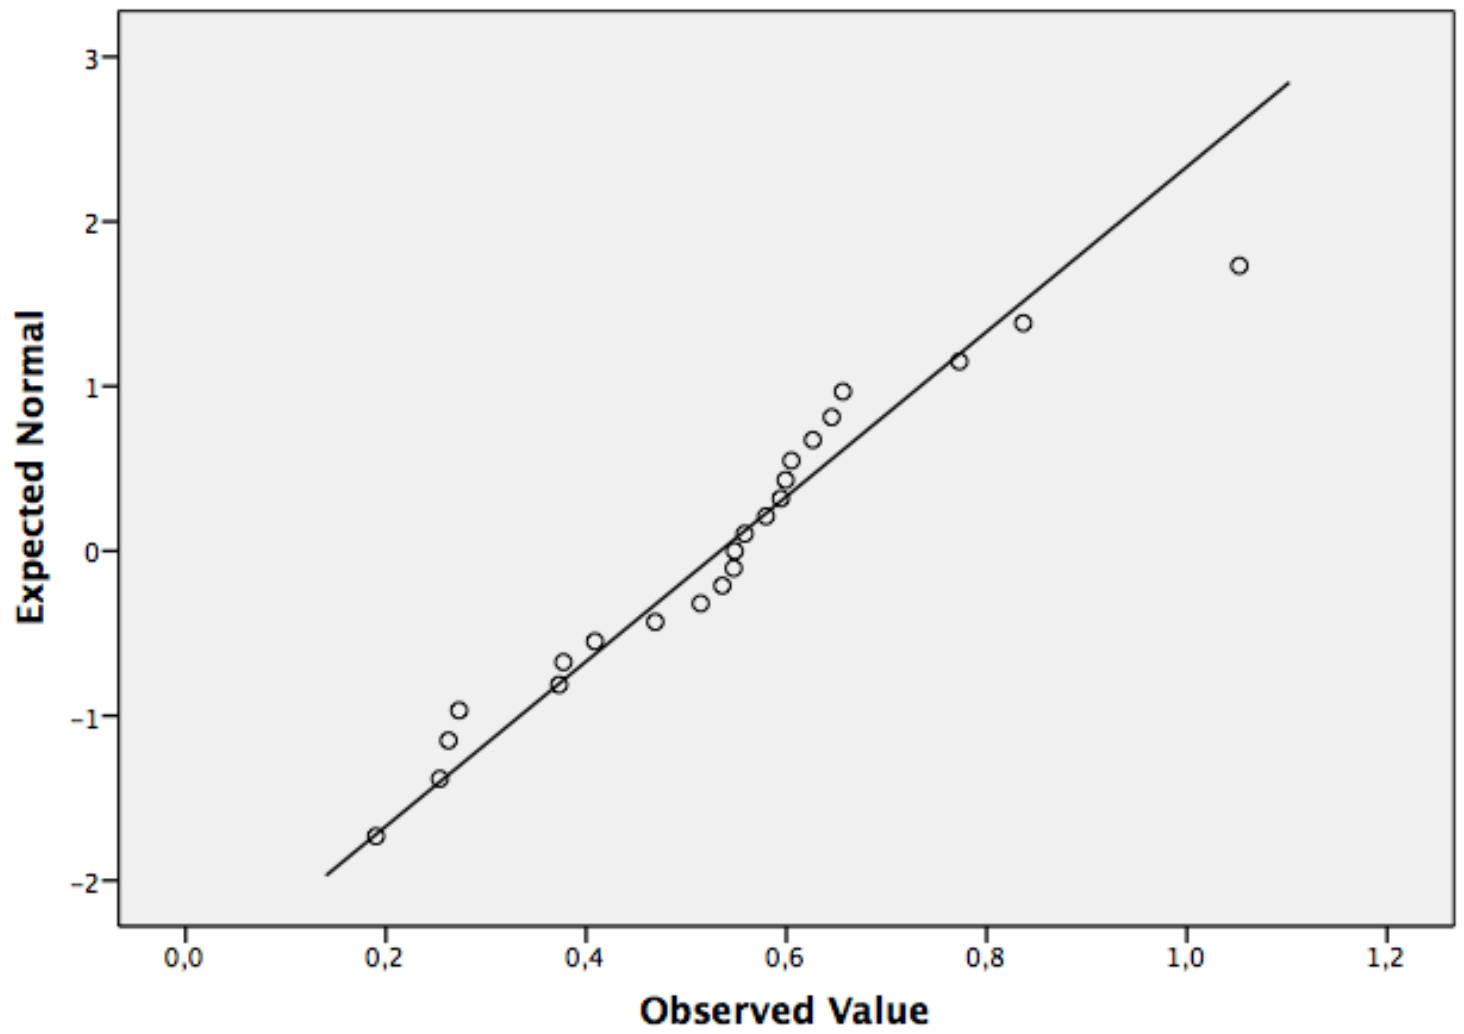

Normal Q-Q Plots

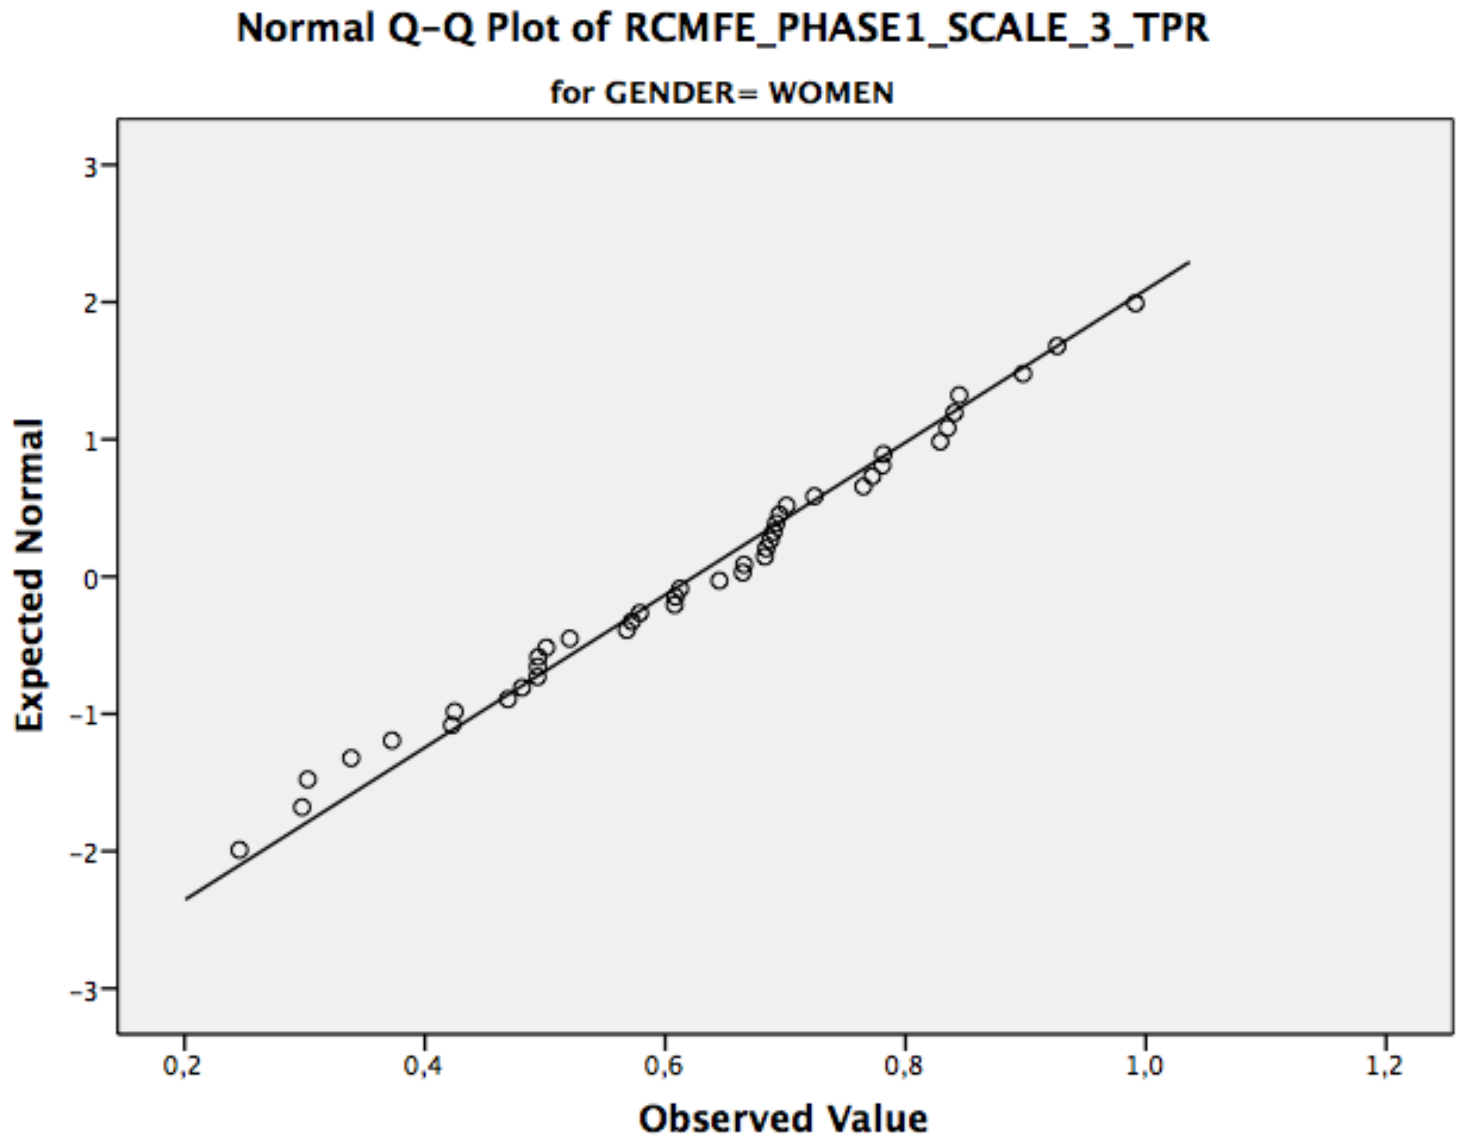



# Normal Q-Q Plot of RCMFE\_PHASE1\_SCALE\_3\_TPR

for GENDER= MEN

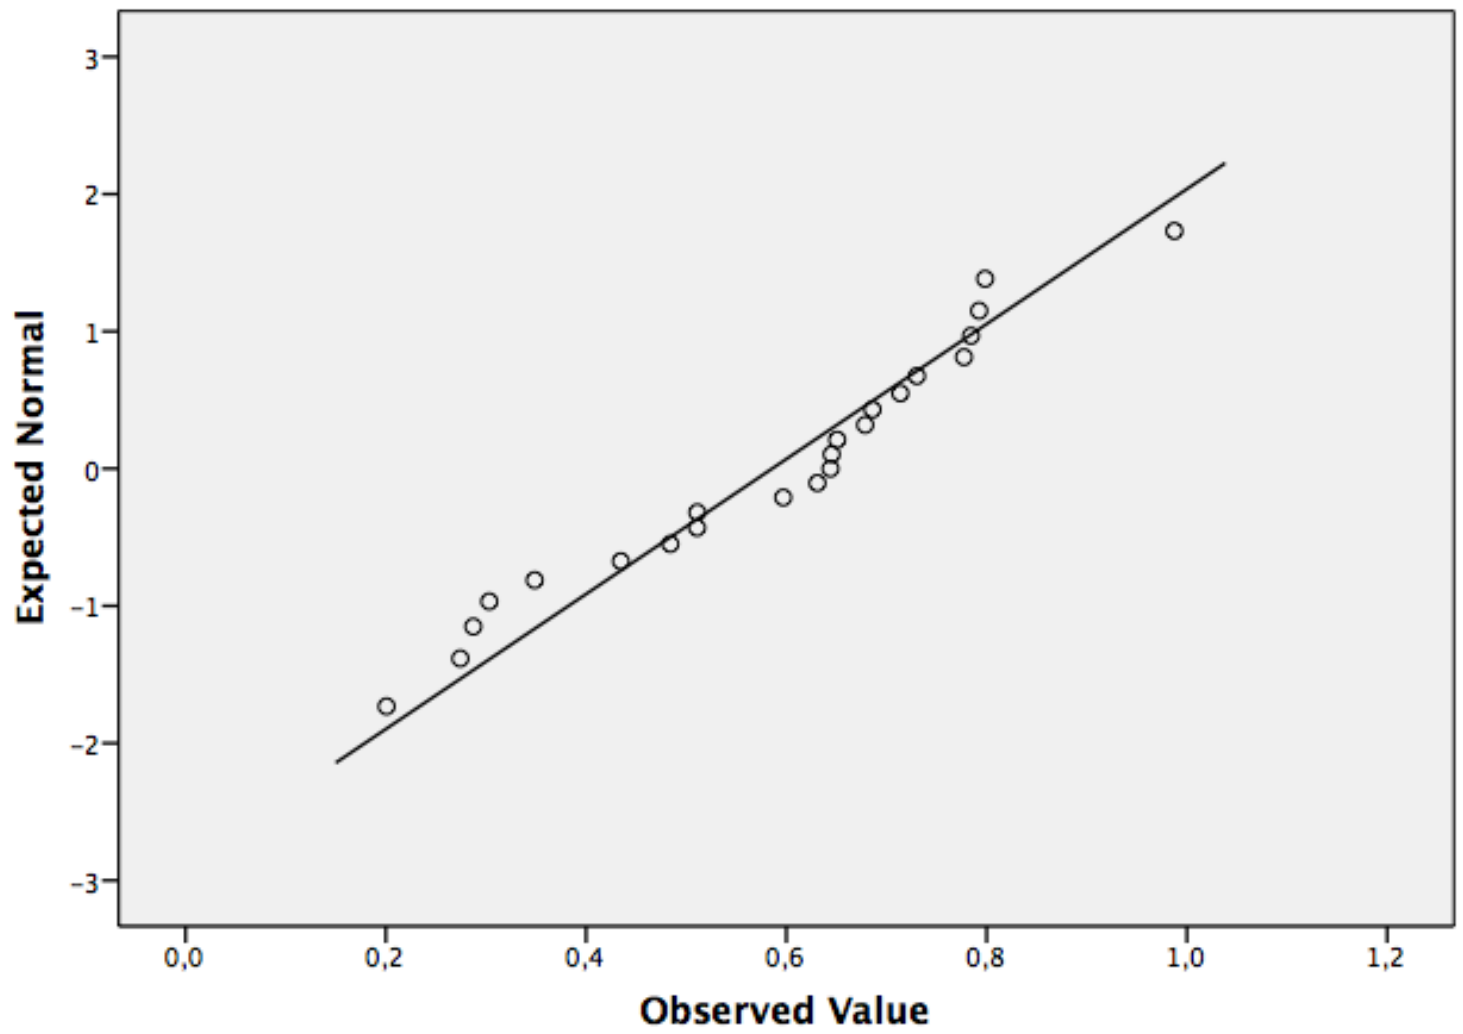

Normal Q-Q Plots

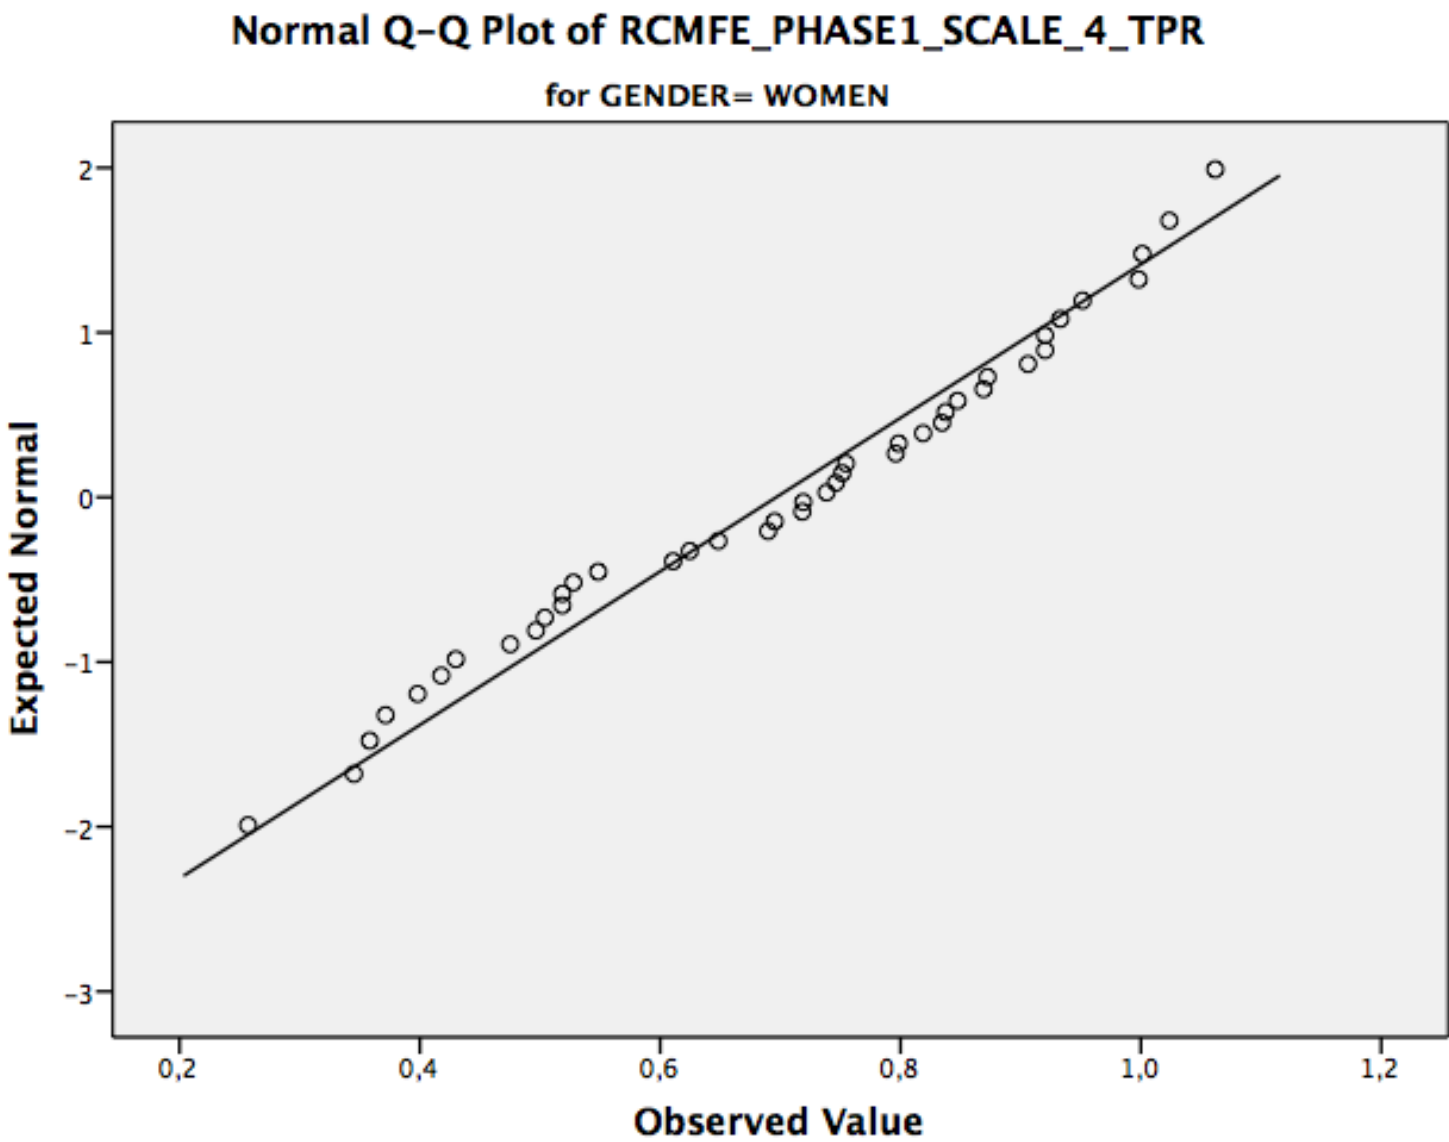

# Normal Q-Q Plot of RCMFE\_PHASE1\_SCALE\_4\_TPR

for GENDER= MEN

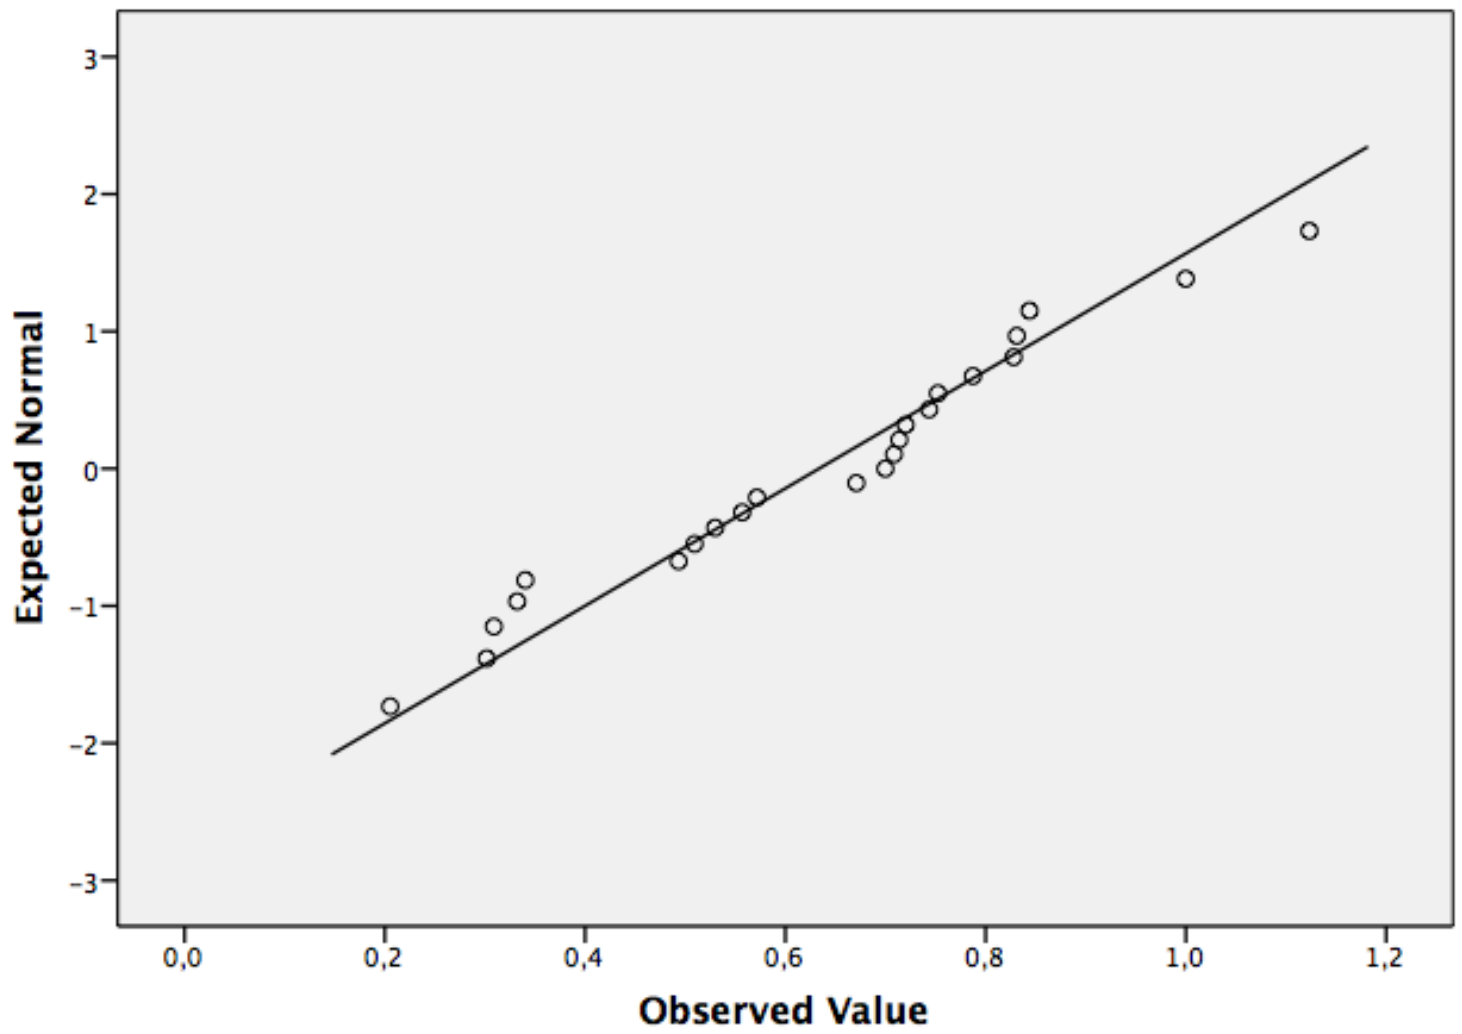

Normal Q-Q Plots

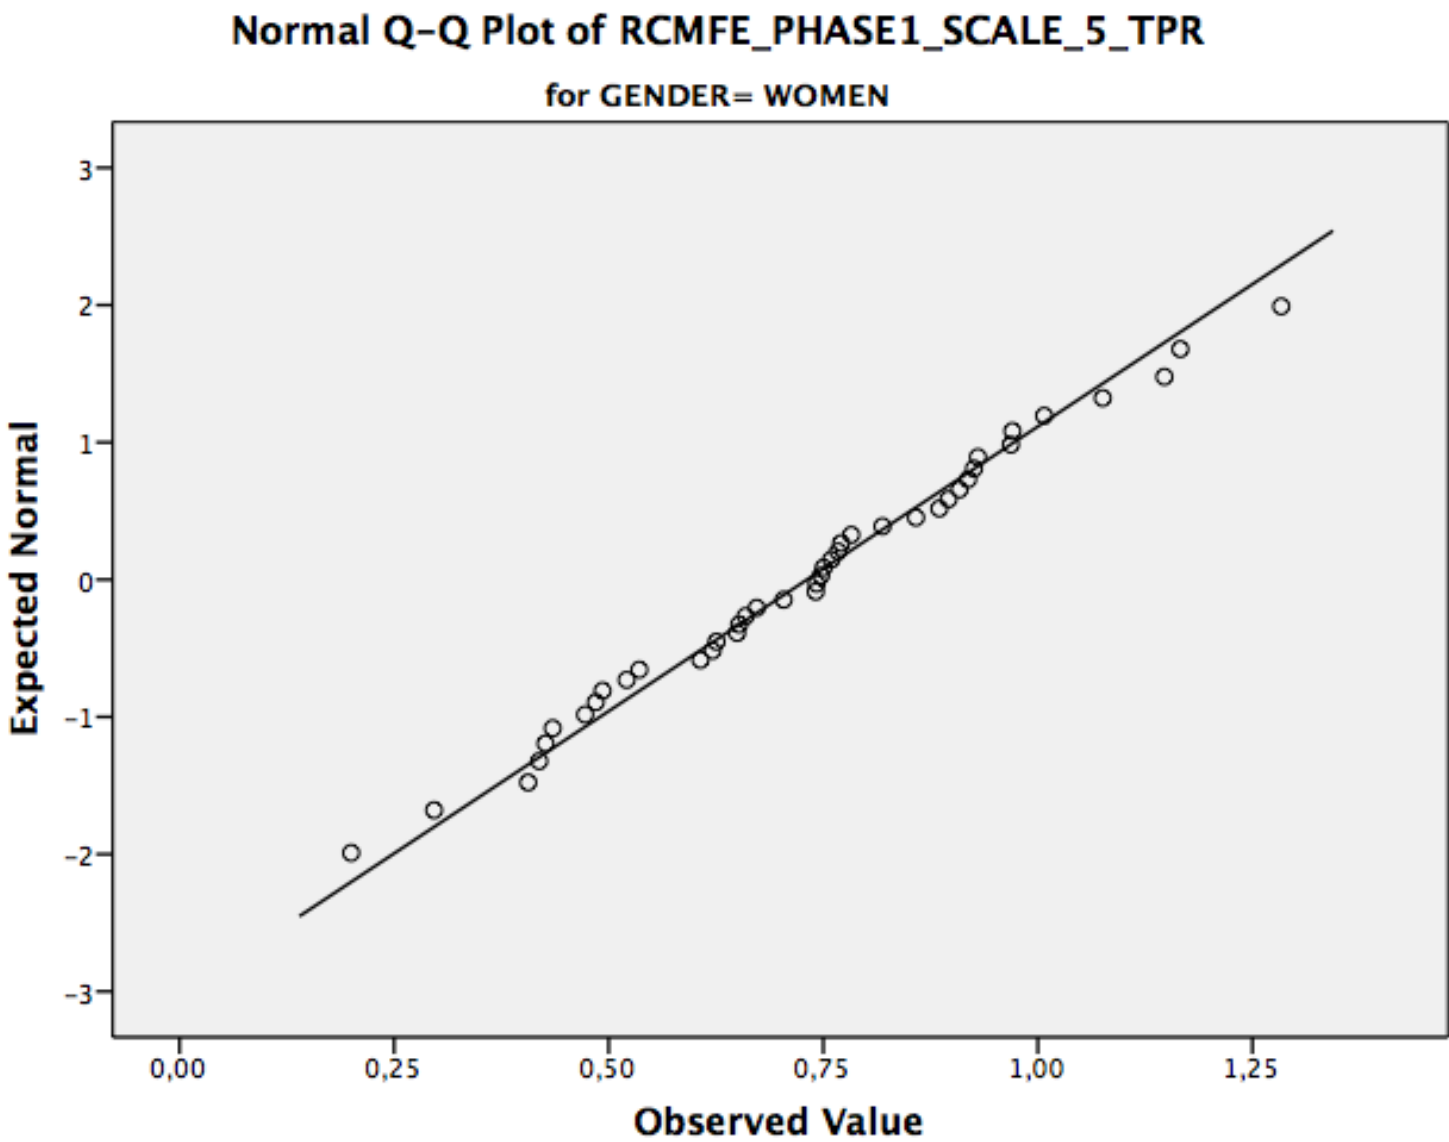

# Normal Q-Q Plot of RCMFE\_PHASE1\_SCALE\_5\_TPR

for GENDER= MEN

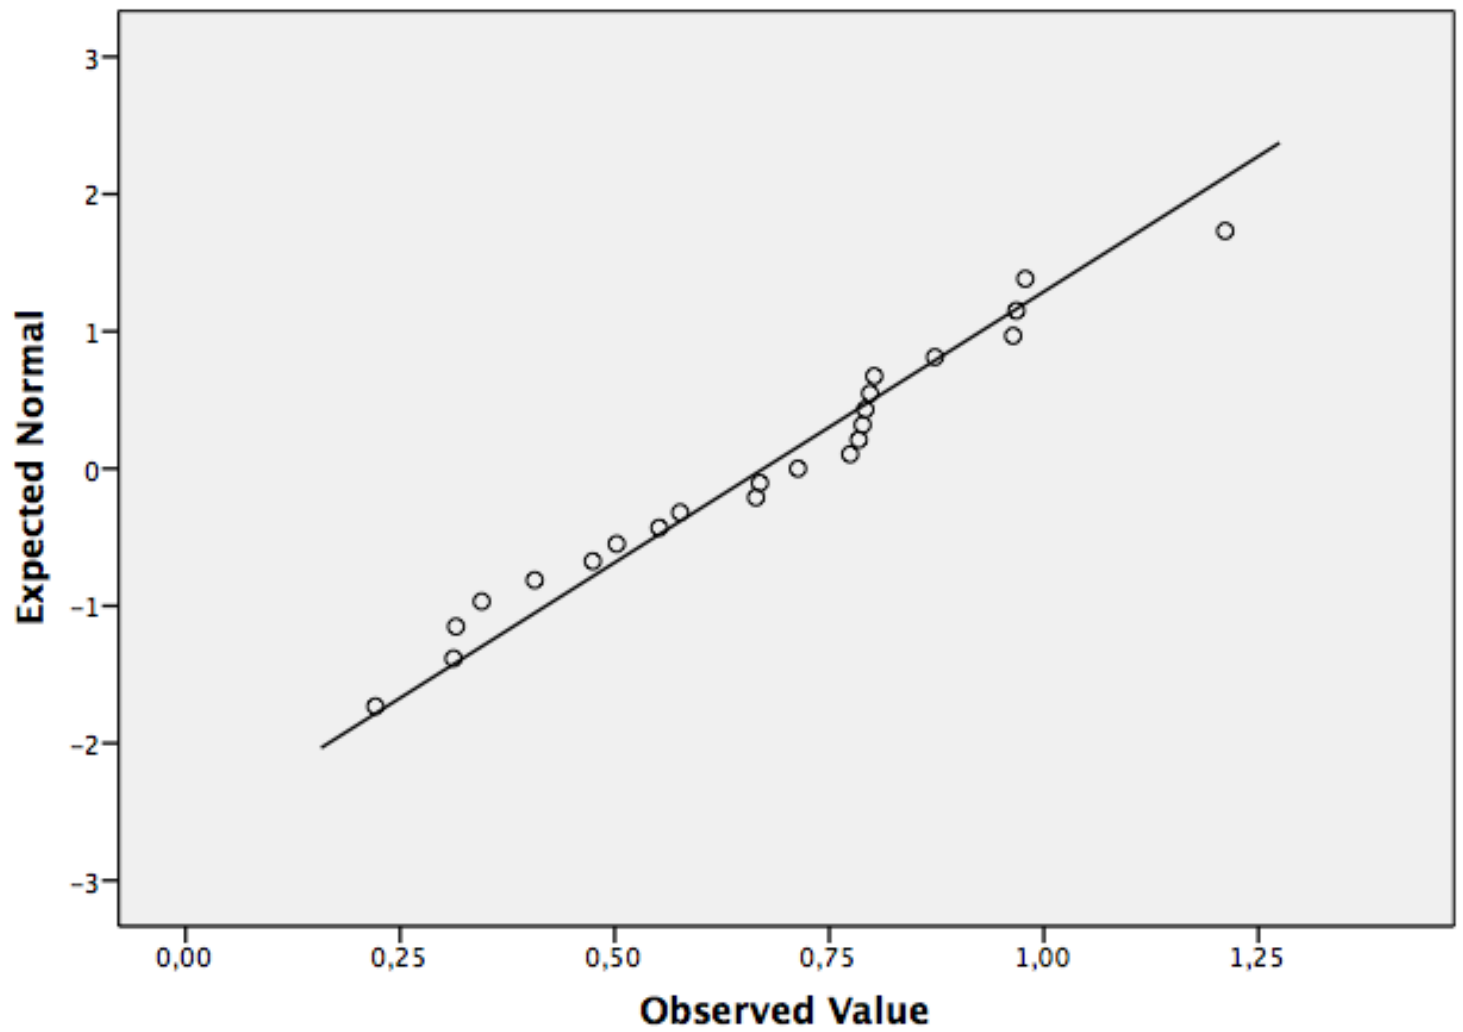

Normal Q-Q Plots

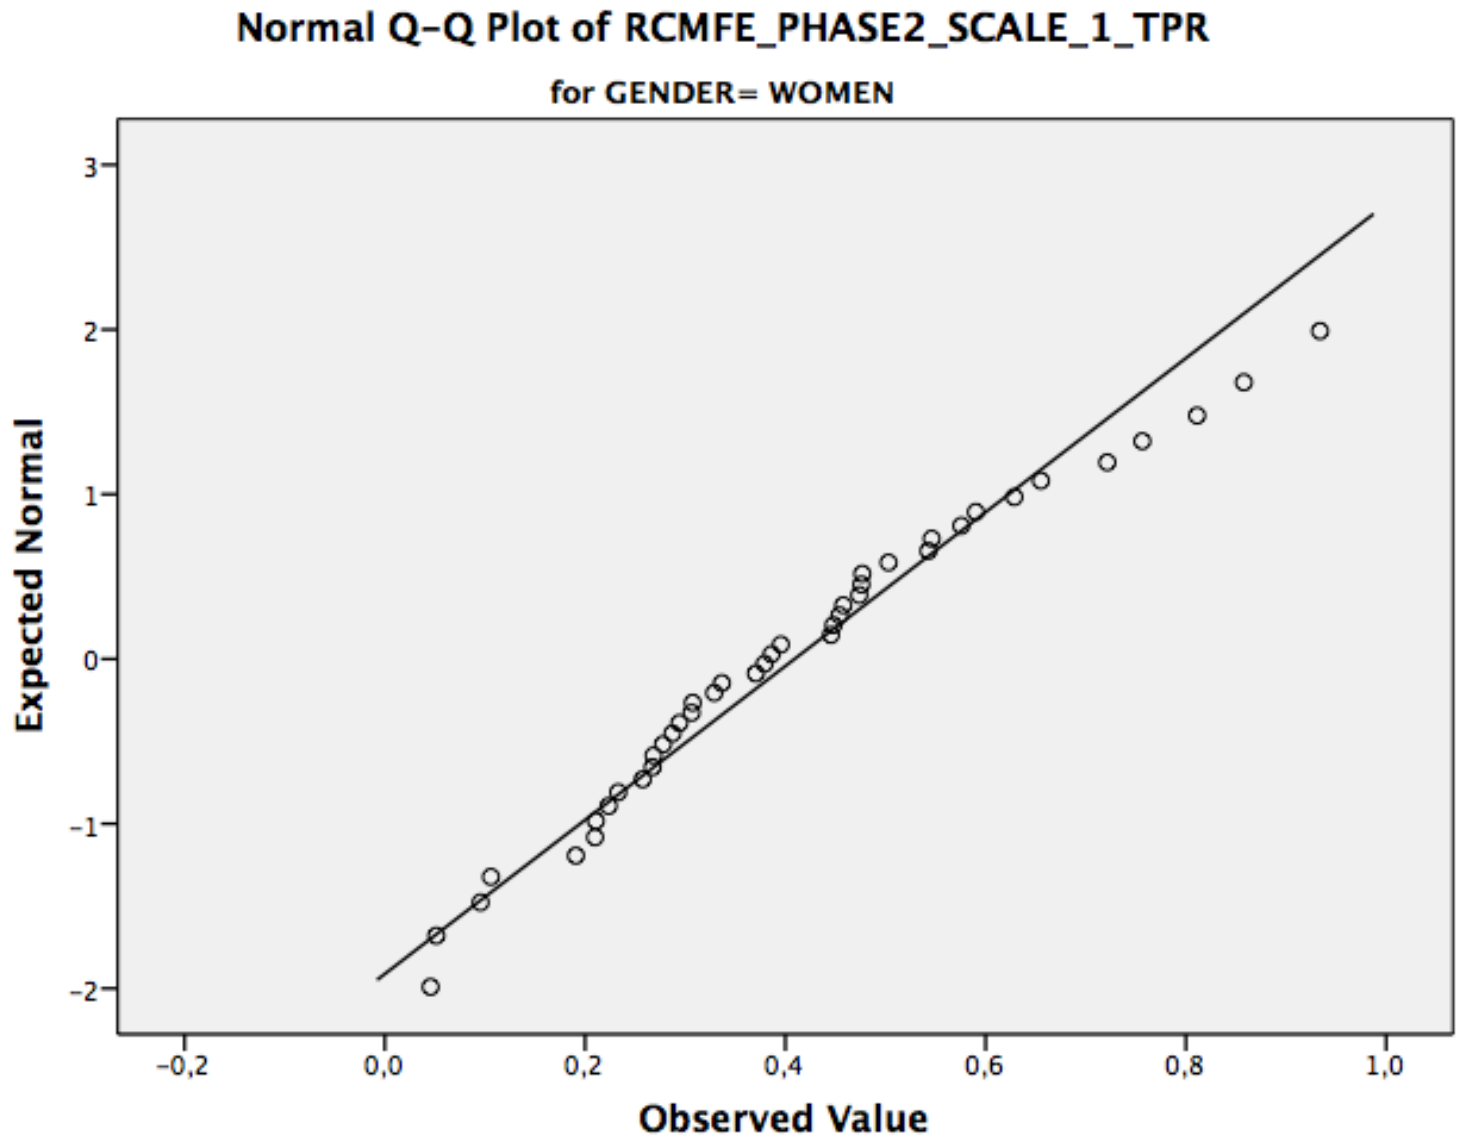

# Normal Q-Q Plot of RCMFE\_PHASE2\_SCALE\_1\_TPR

for GENDER= MEN

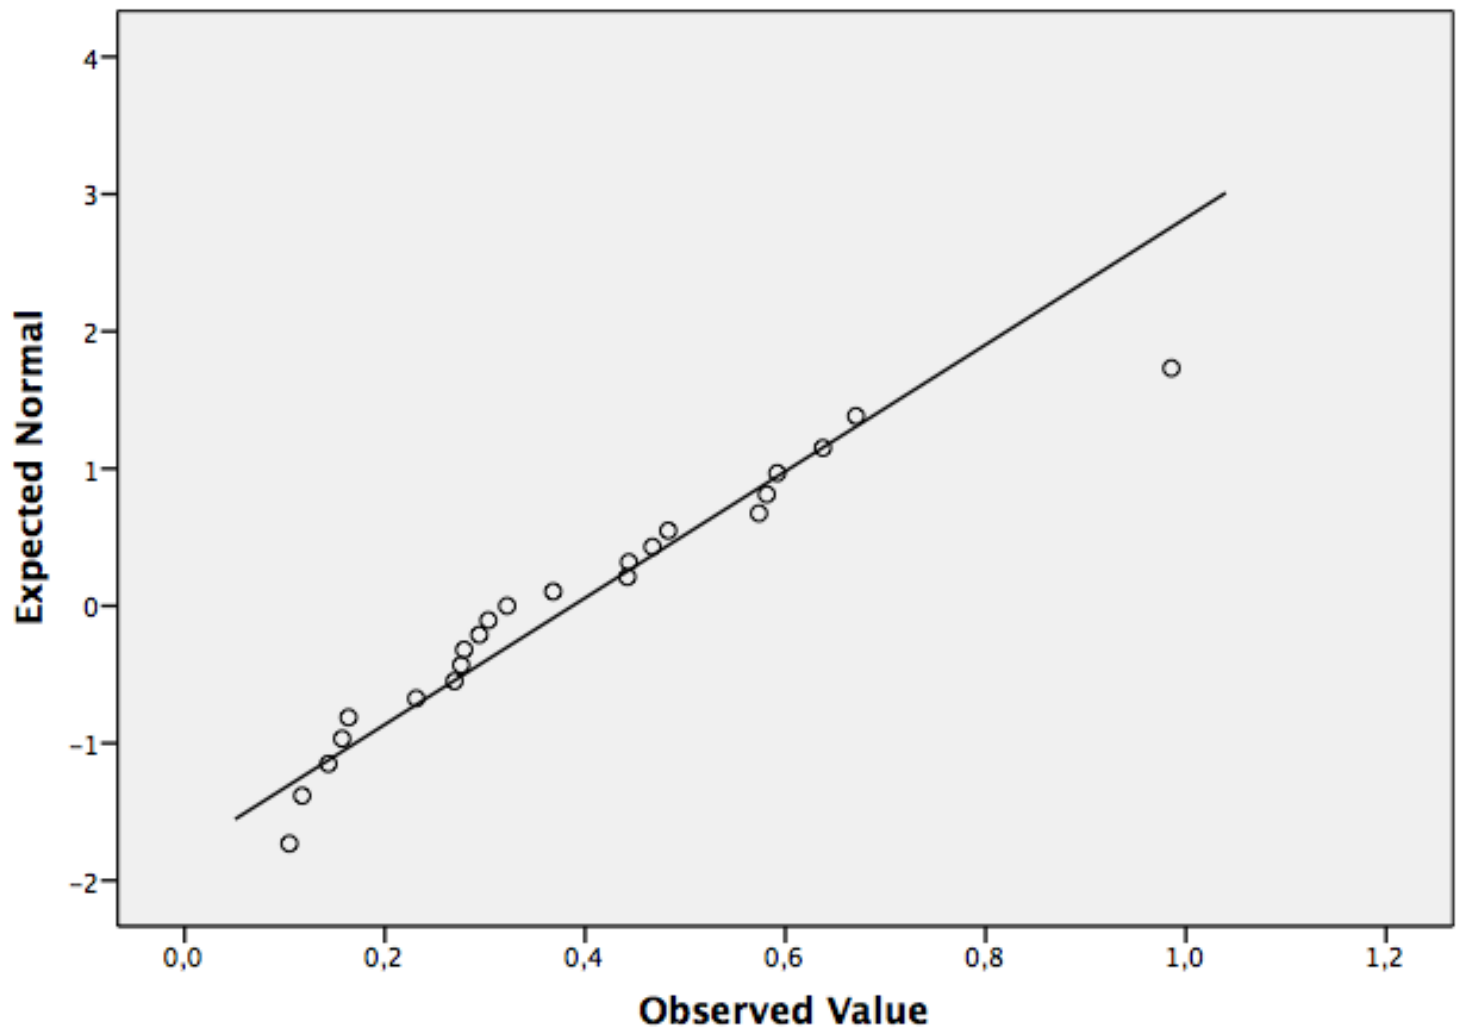

## Normal Q-Q Plots

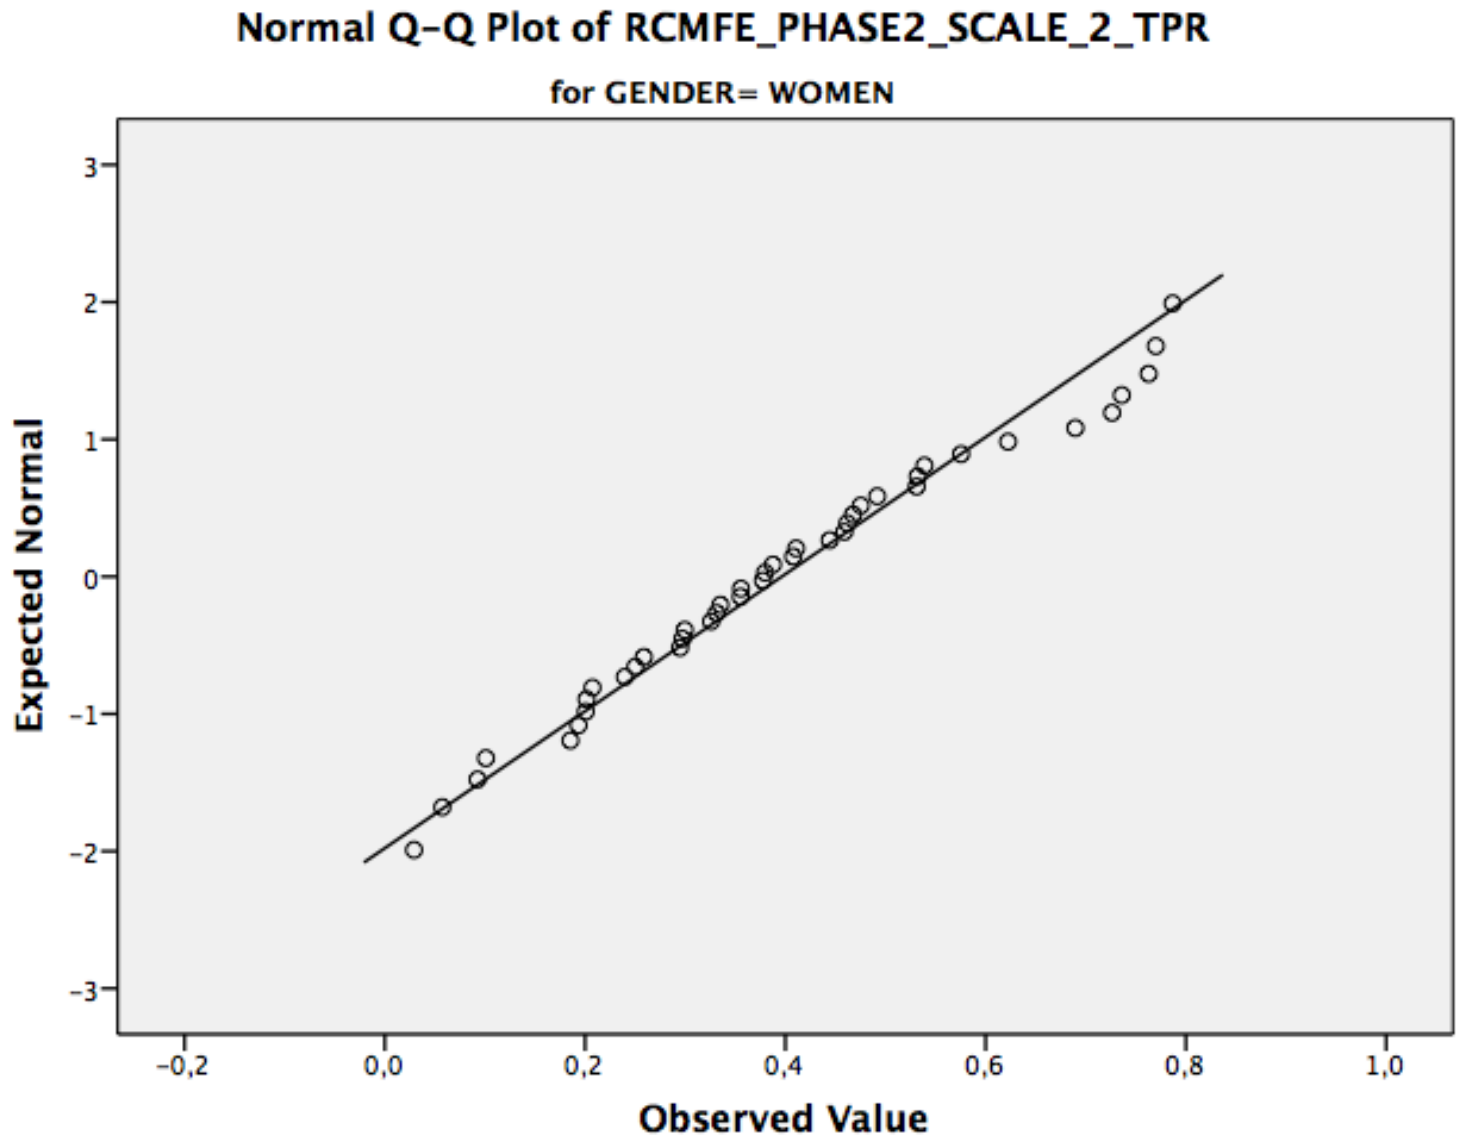



# Normal Q-Q Plot of RCMFE\_PHASE2\_SCALE\_2\_TPR

for GENDER= MEN

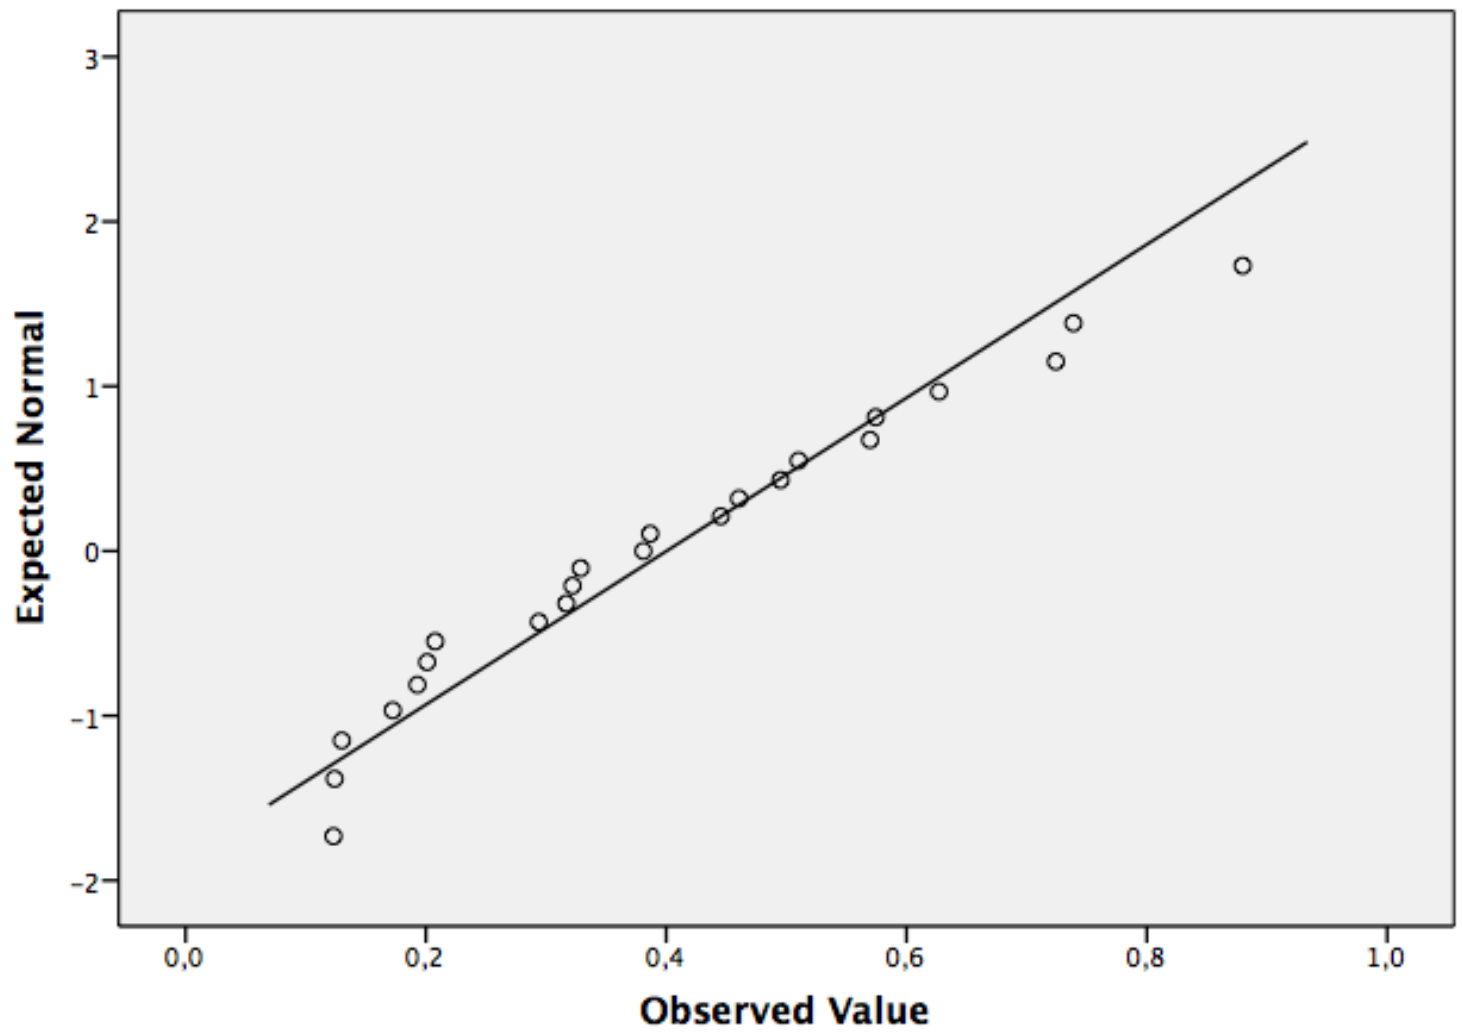

## Normal Q-Q Plots

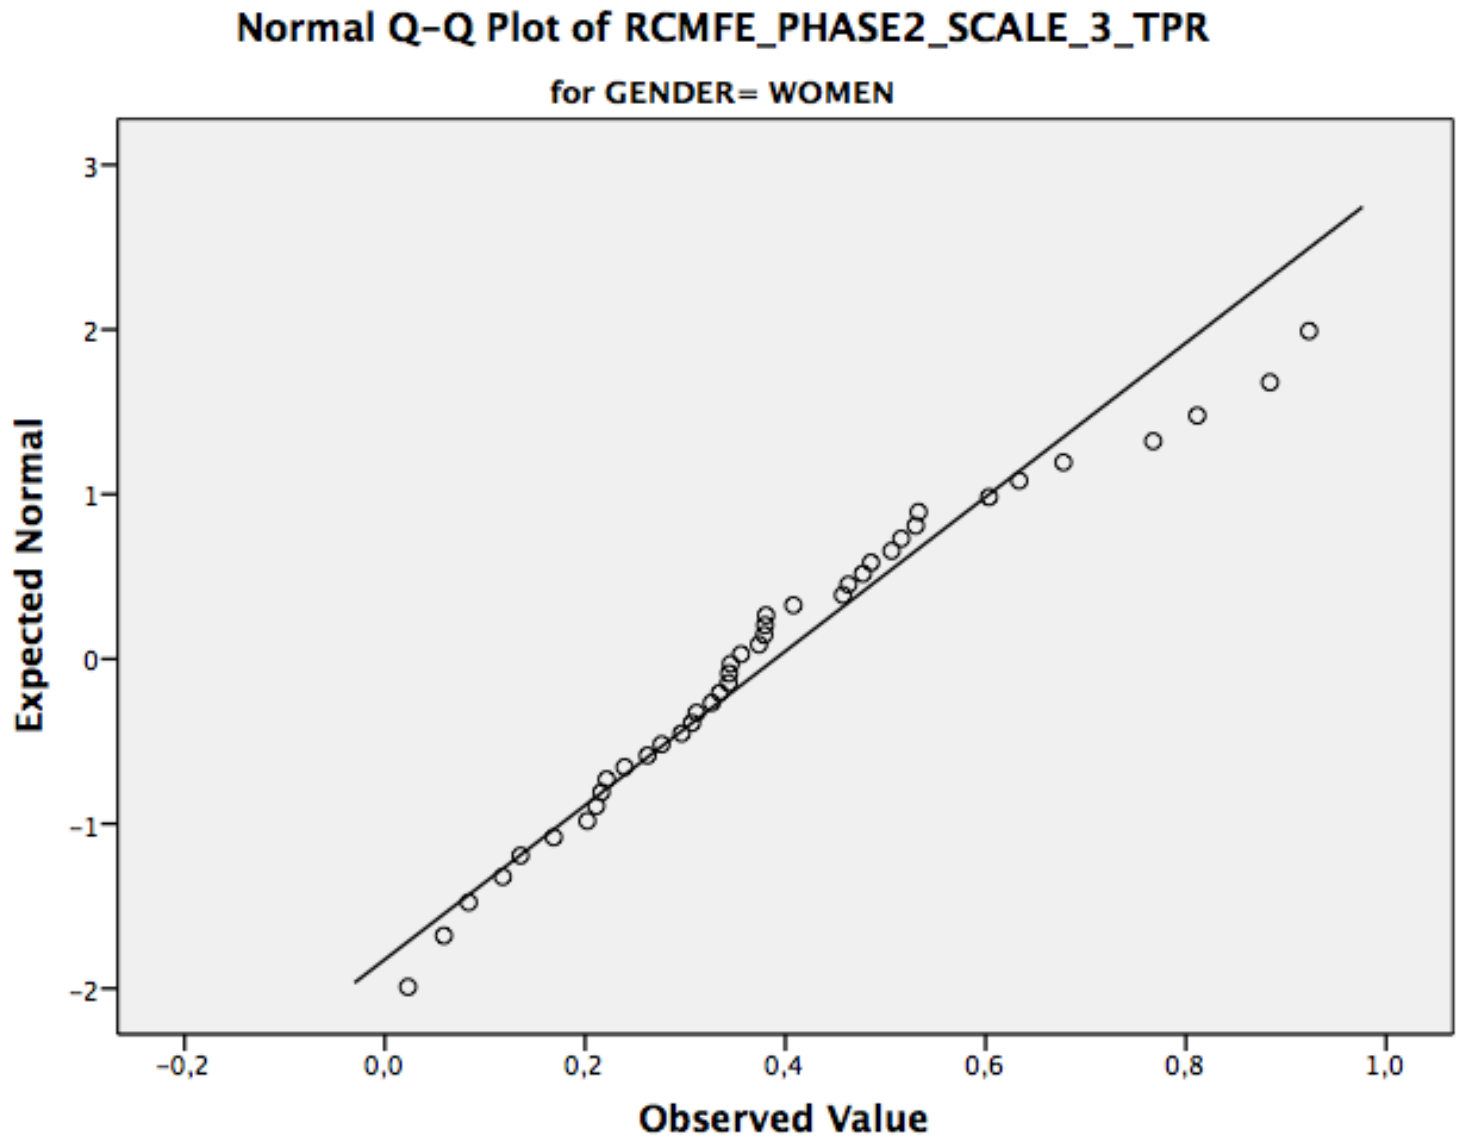

# Normal Q-Q Plot of RCMFE\_PHASE2\_SCALE\_3\_TPR

for GENDER= MEN

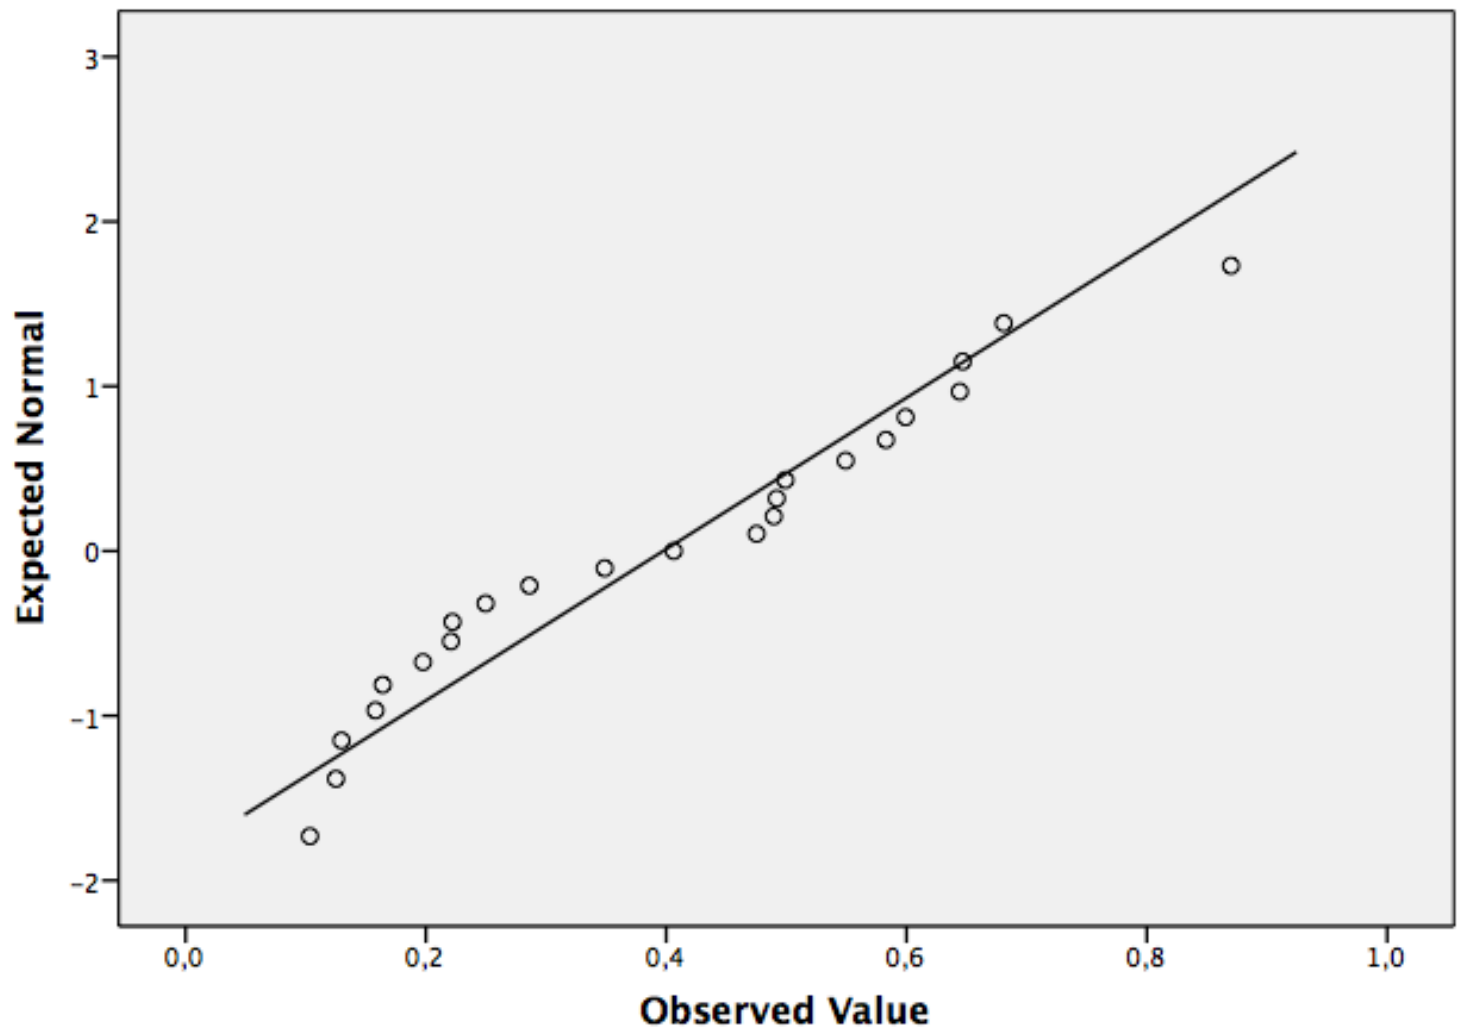

Normal Q-Q Plots

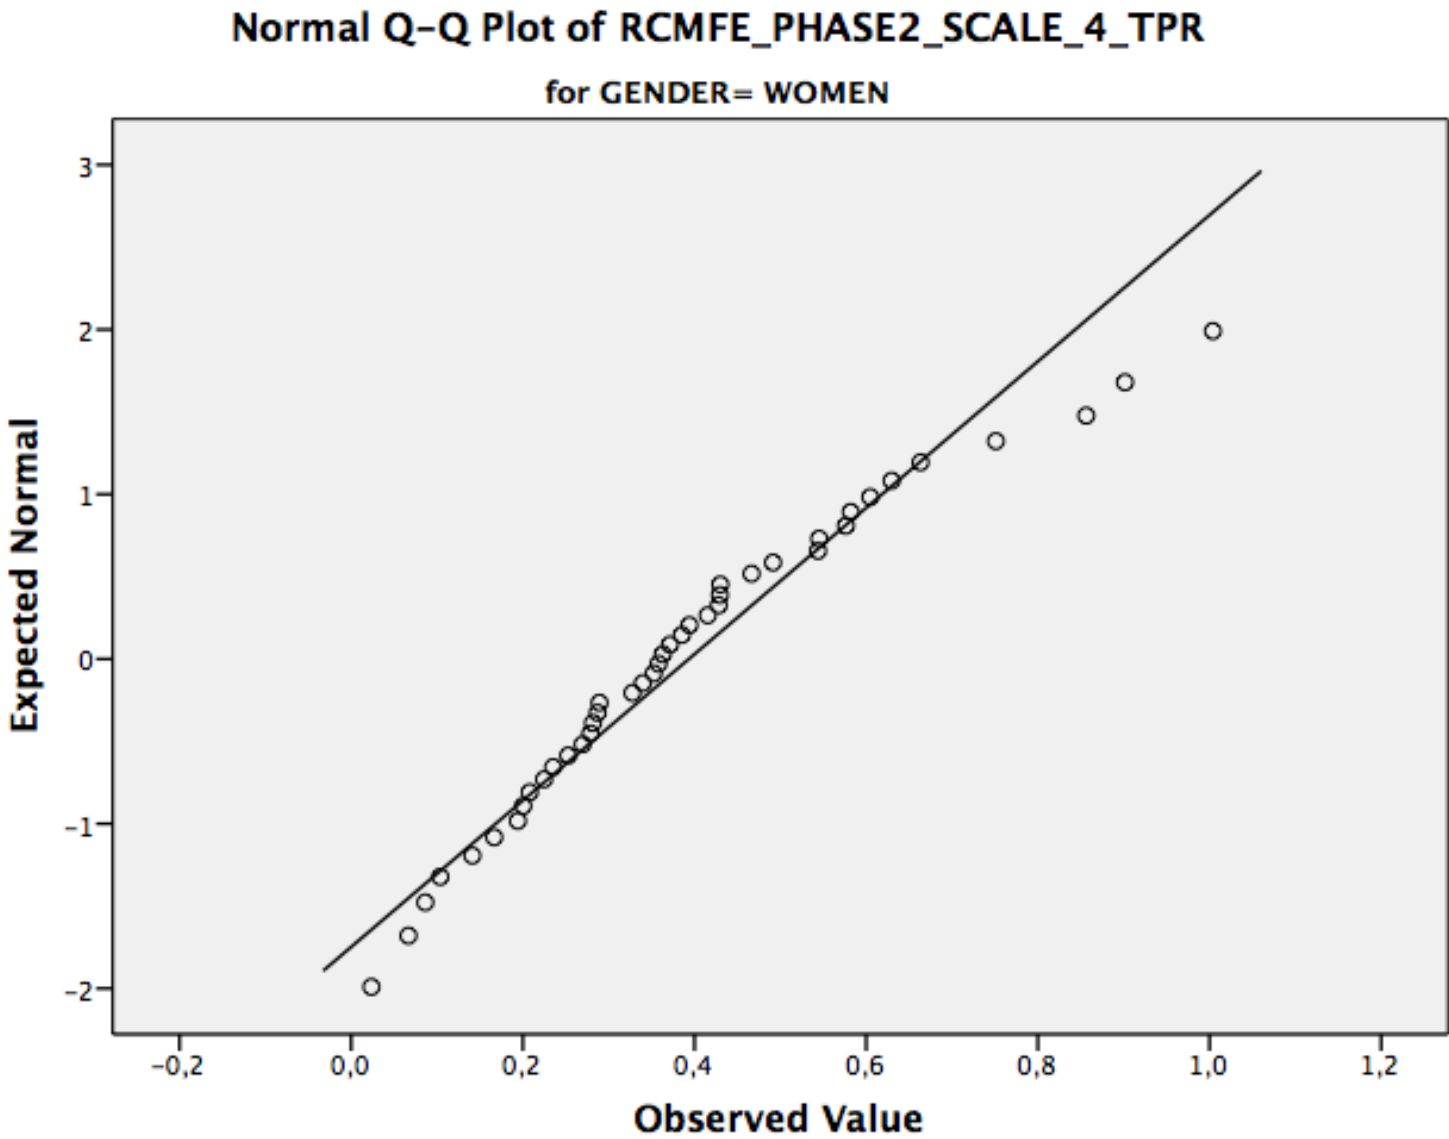

# Normal Q-Q Plot of RCMFE\_PHASE2\_SCALE\_4\_TPR

for GENDER= MEN

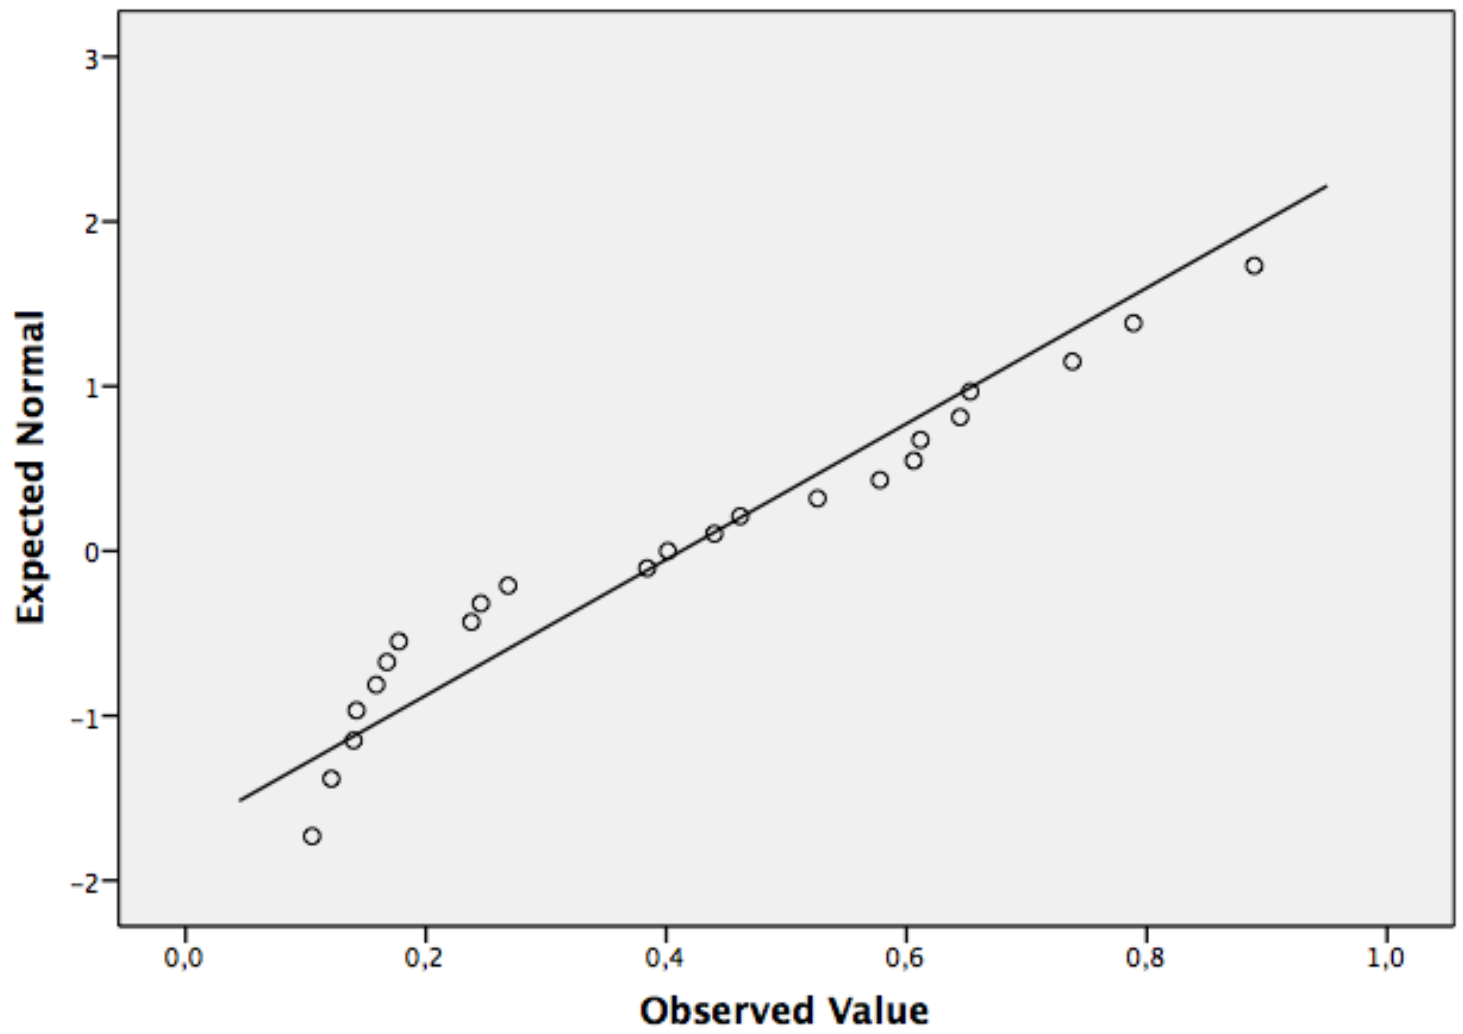

Normal Q-Q Plots

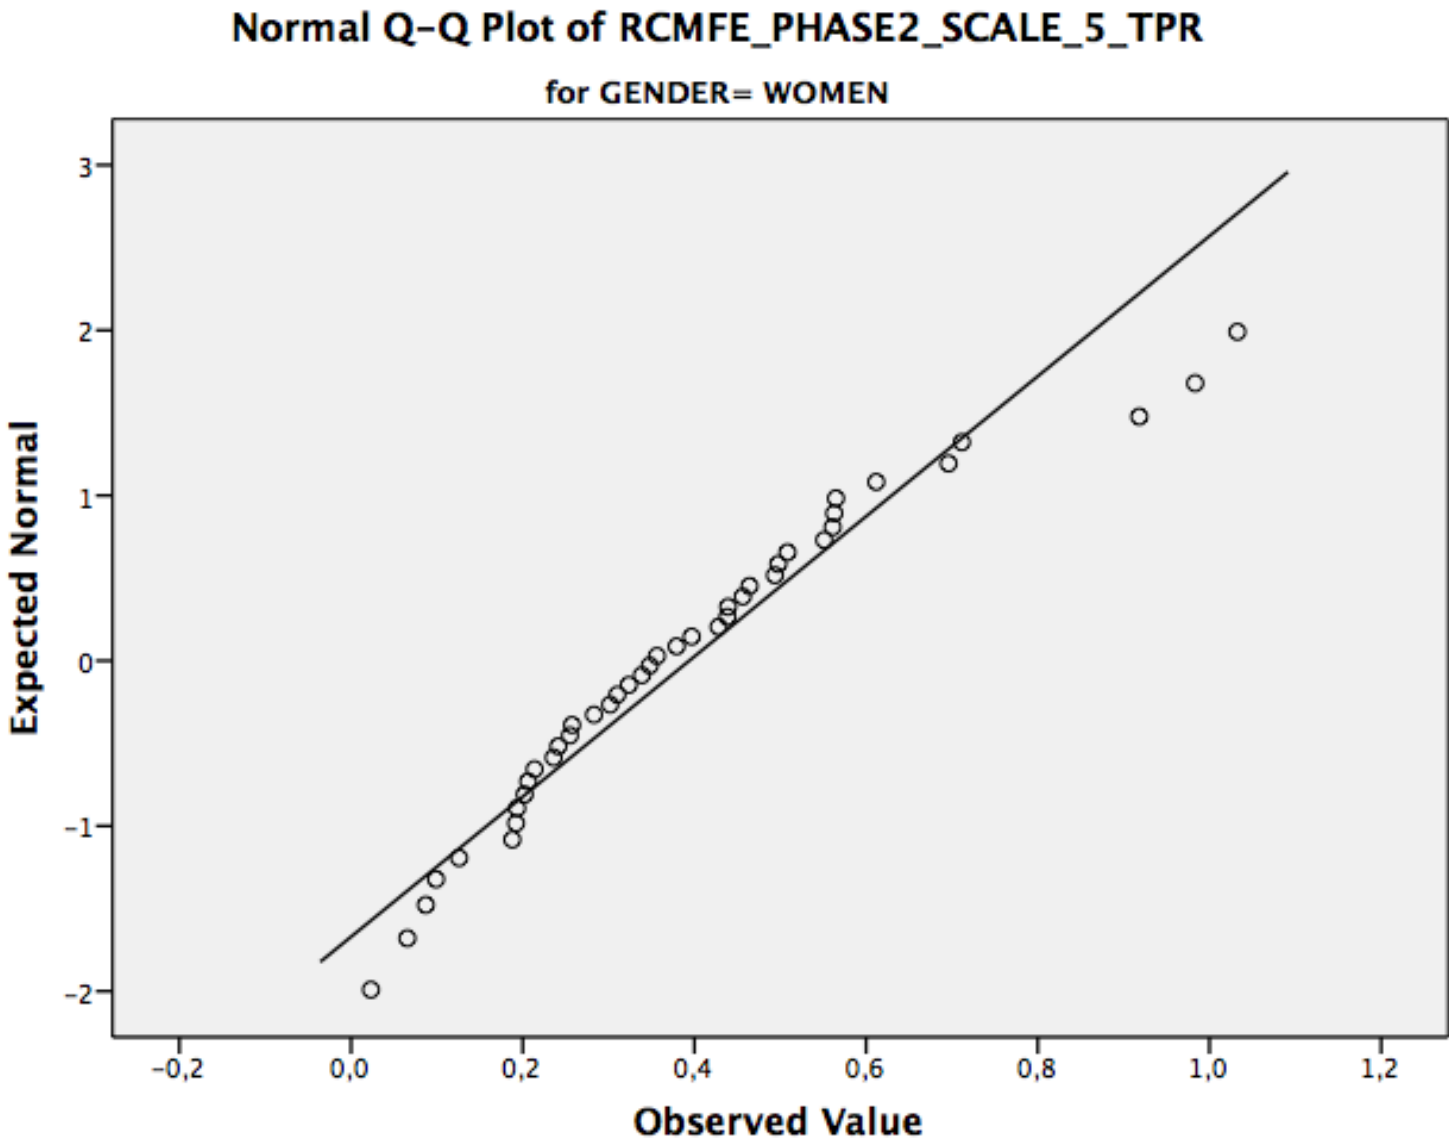

# Normal Q-Q Plot of RCMFE\_PHASE2\_SCALE\_5\_TPR

for GENDER= MEN

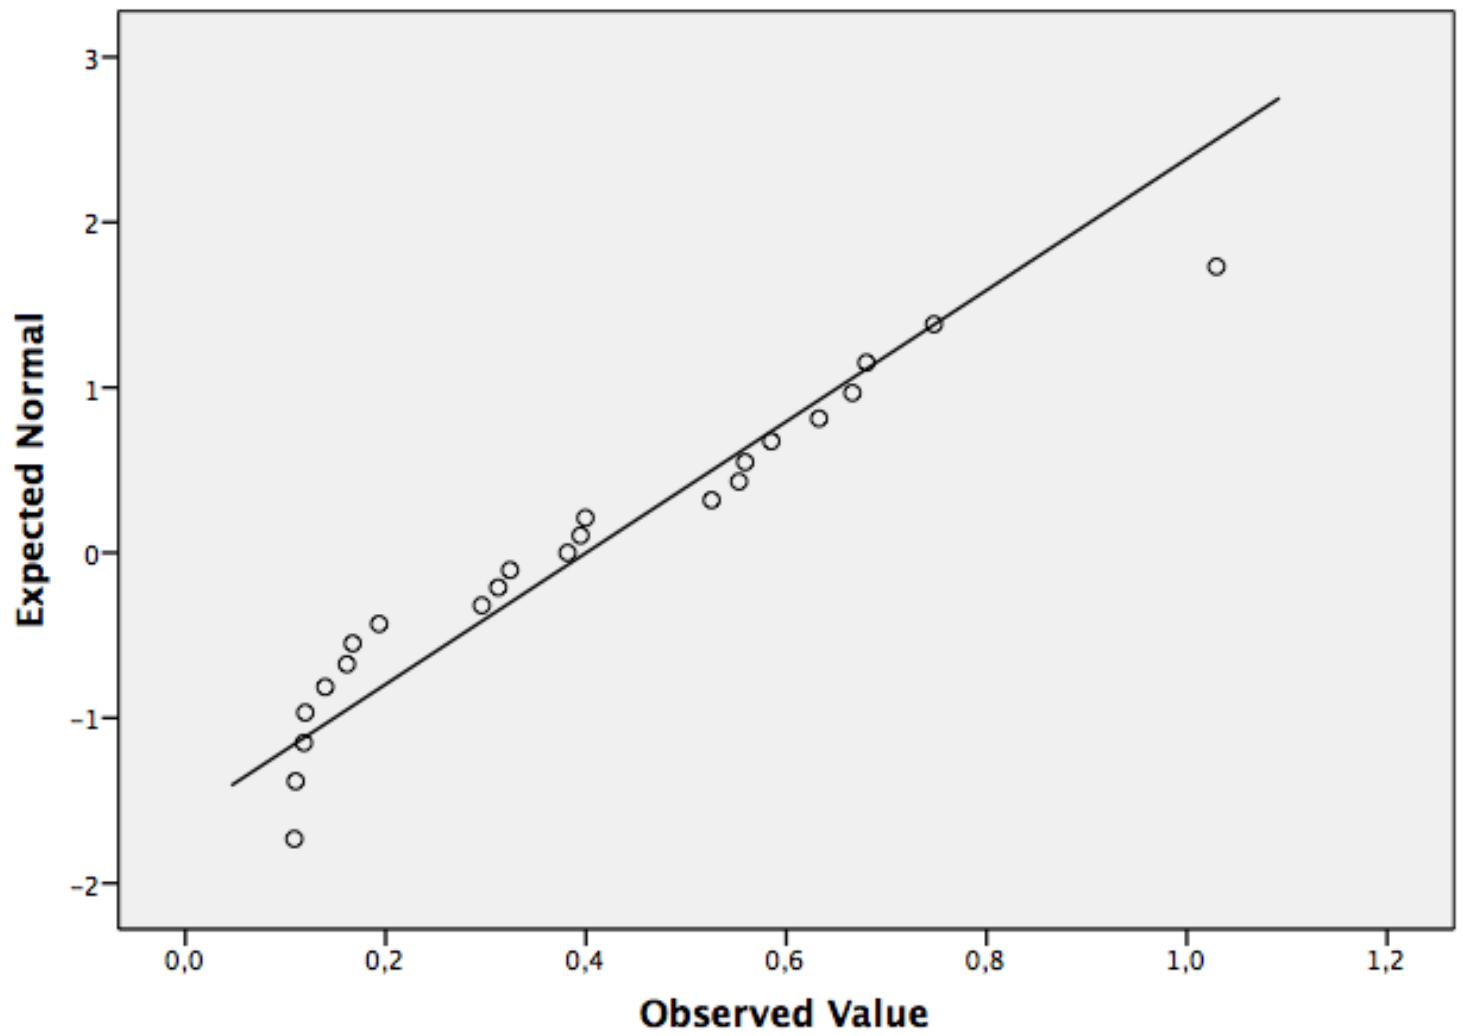

Normal Q-Q Plots

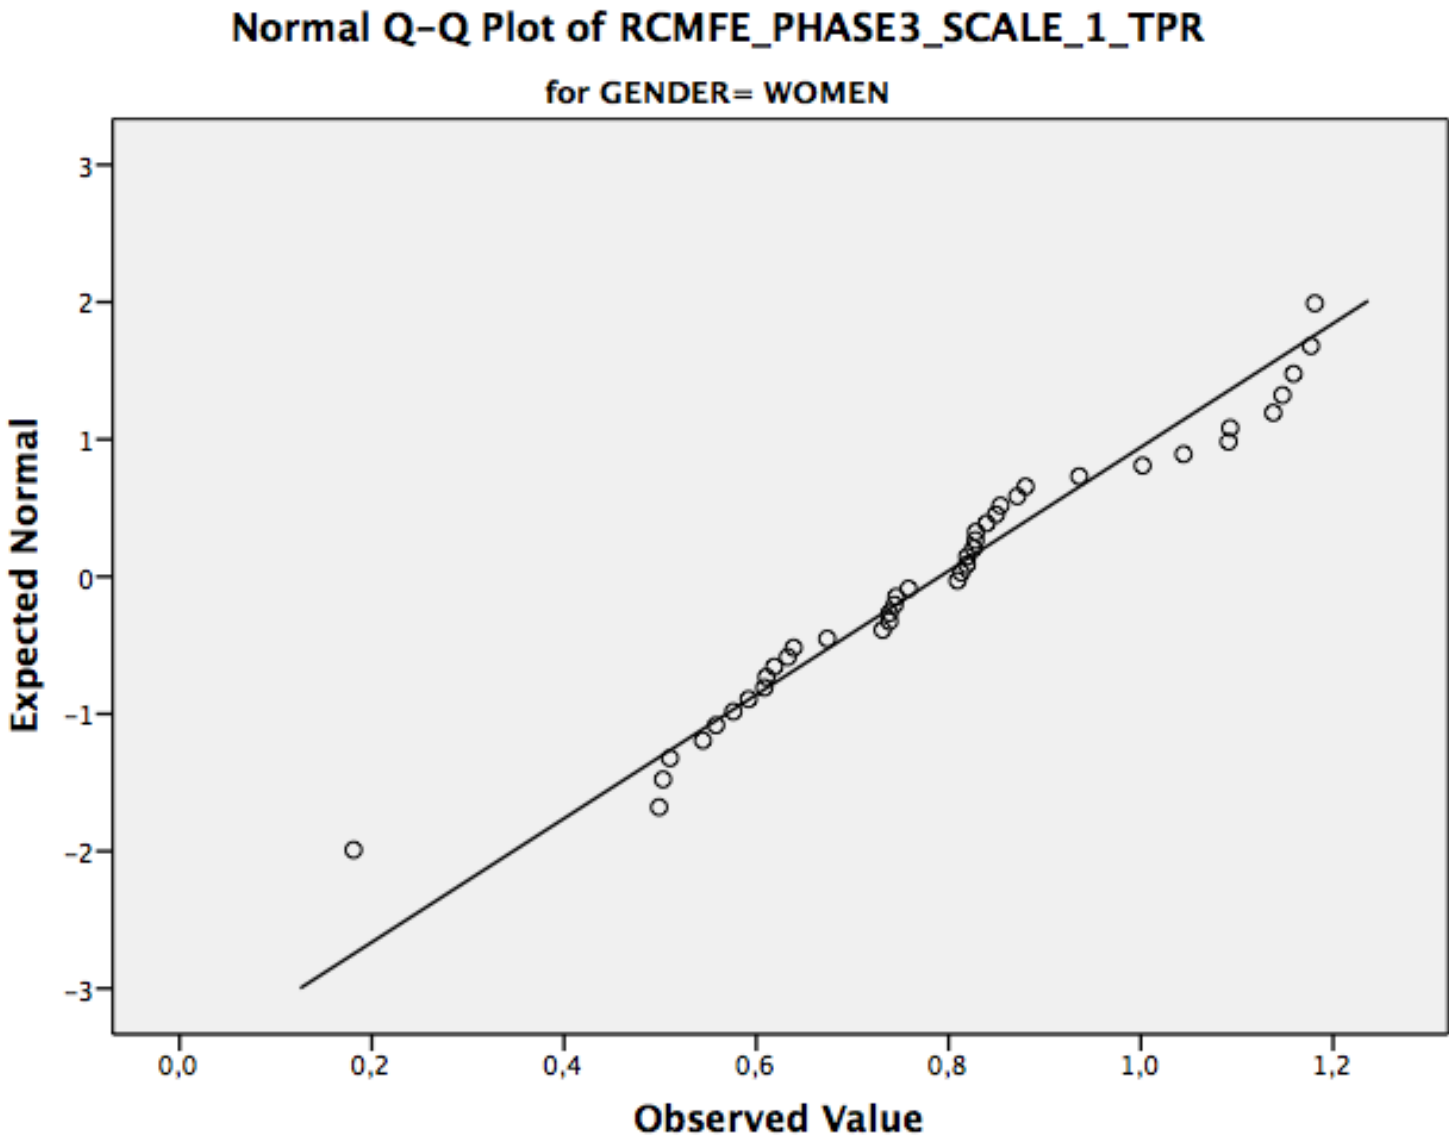



# Normal Q-Q Plot of RCMFE\_PHASE3\_SCALE\_1\_TPR

for GENDER= MEN

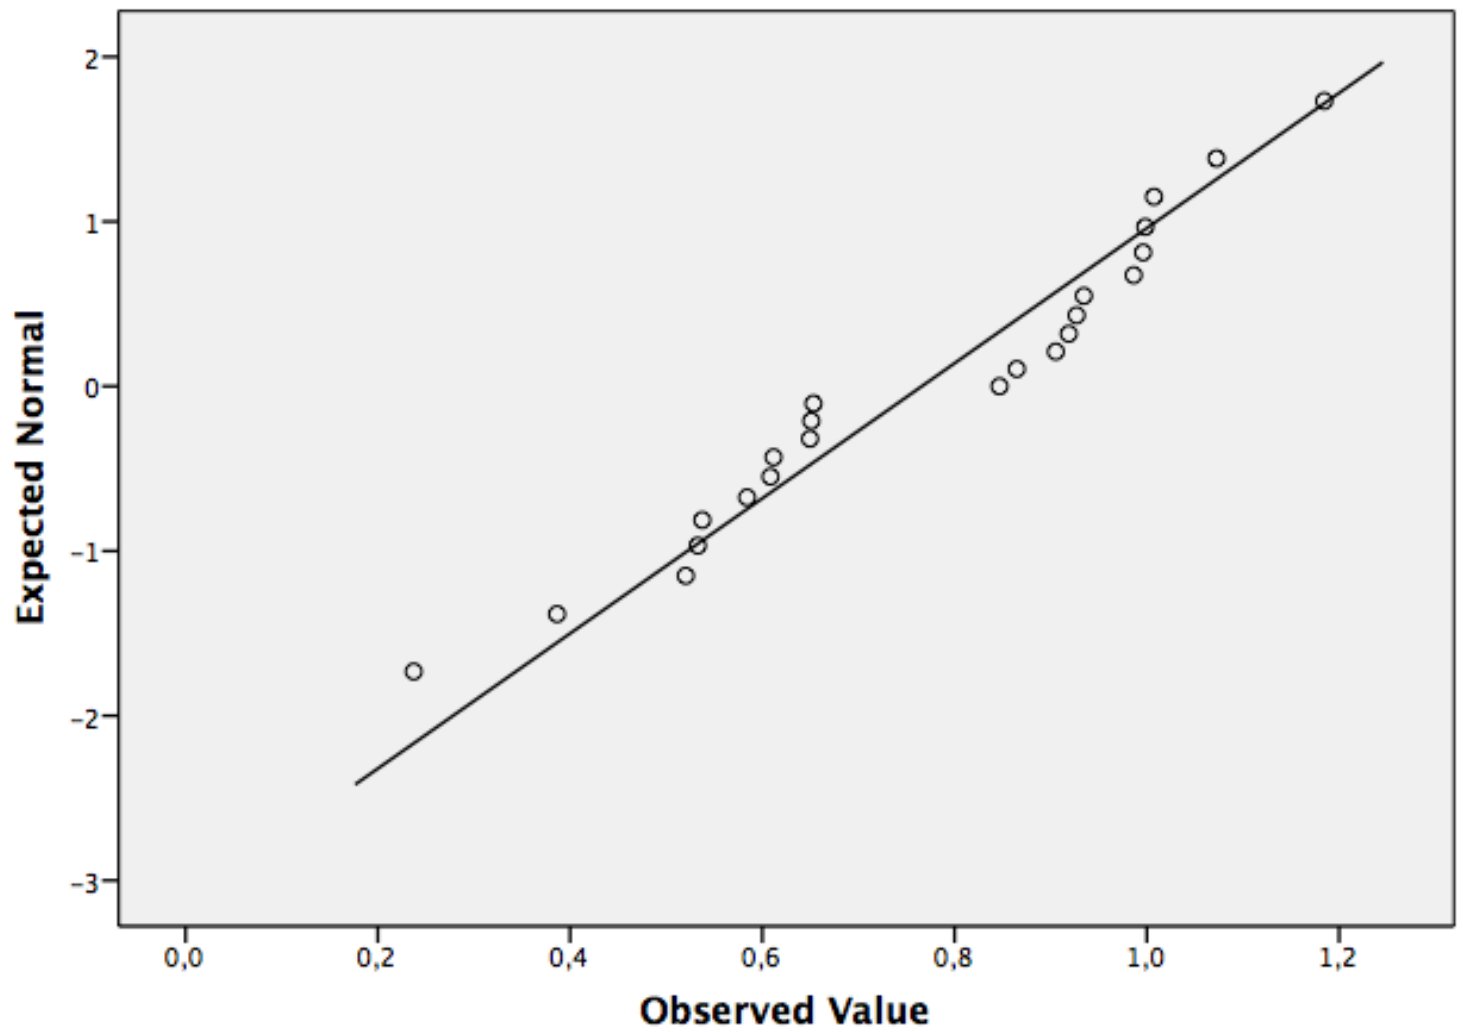

Normal Q-Q Plots

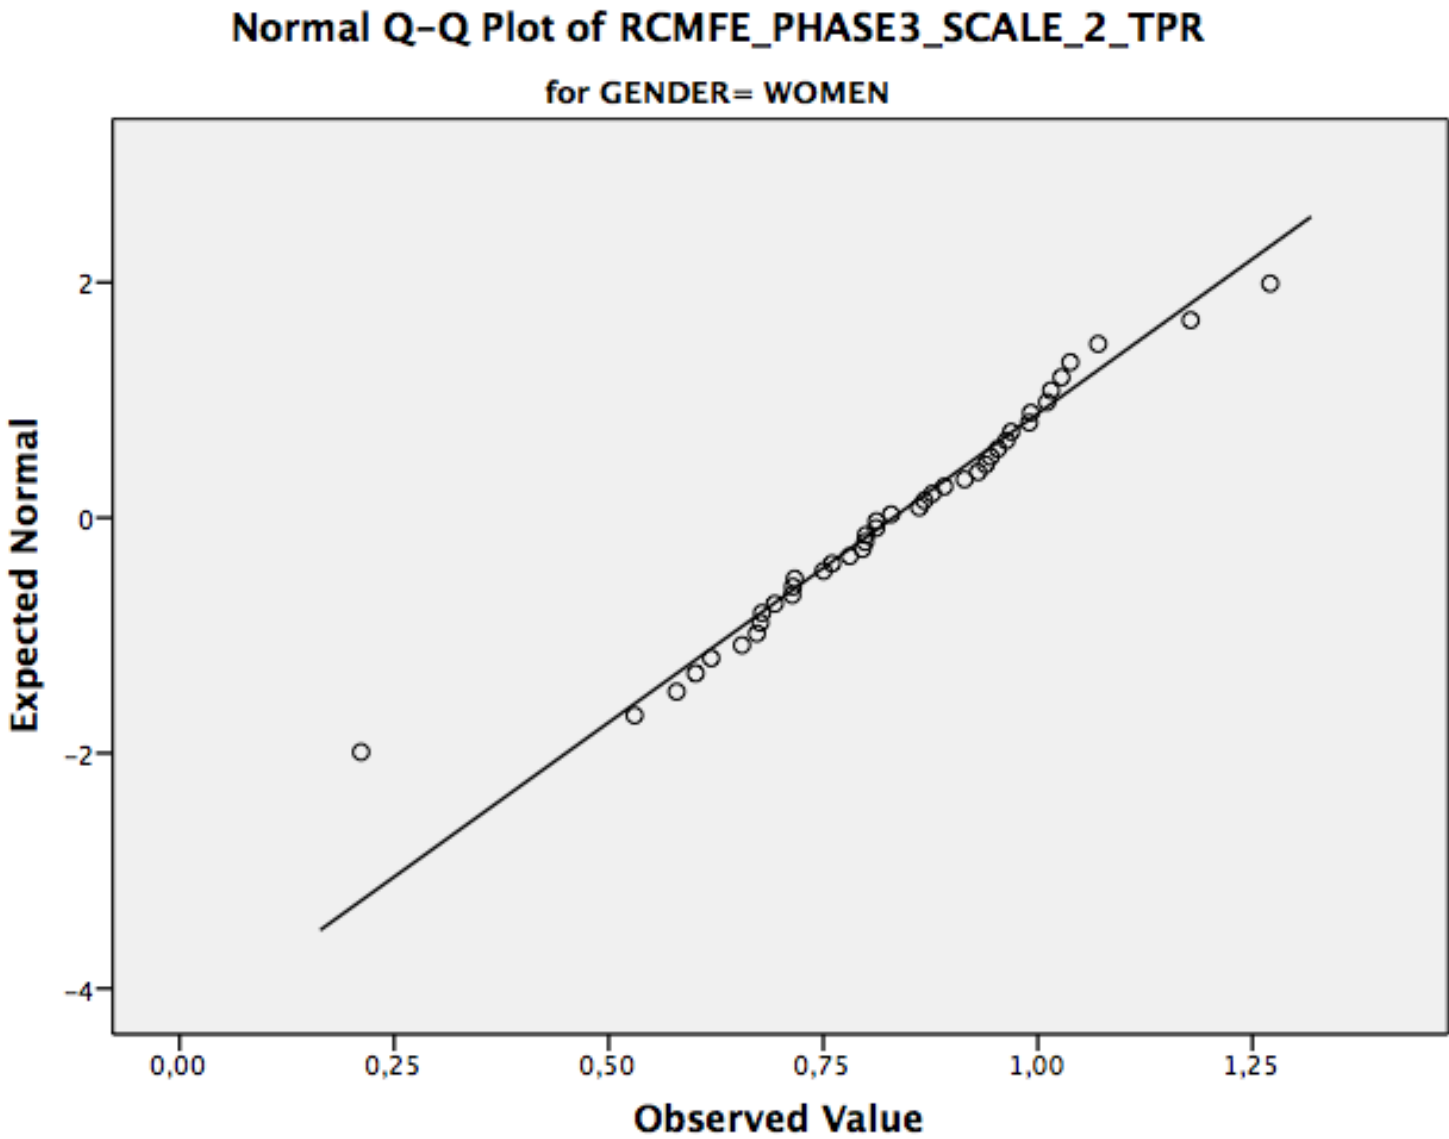

# Normal Q-Q Plot of RCMFE\_PHASE3\_SCALE\_2\_TPR

for GENDER= MEN

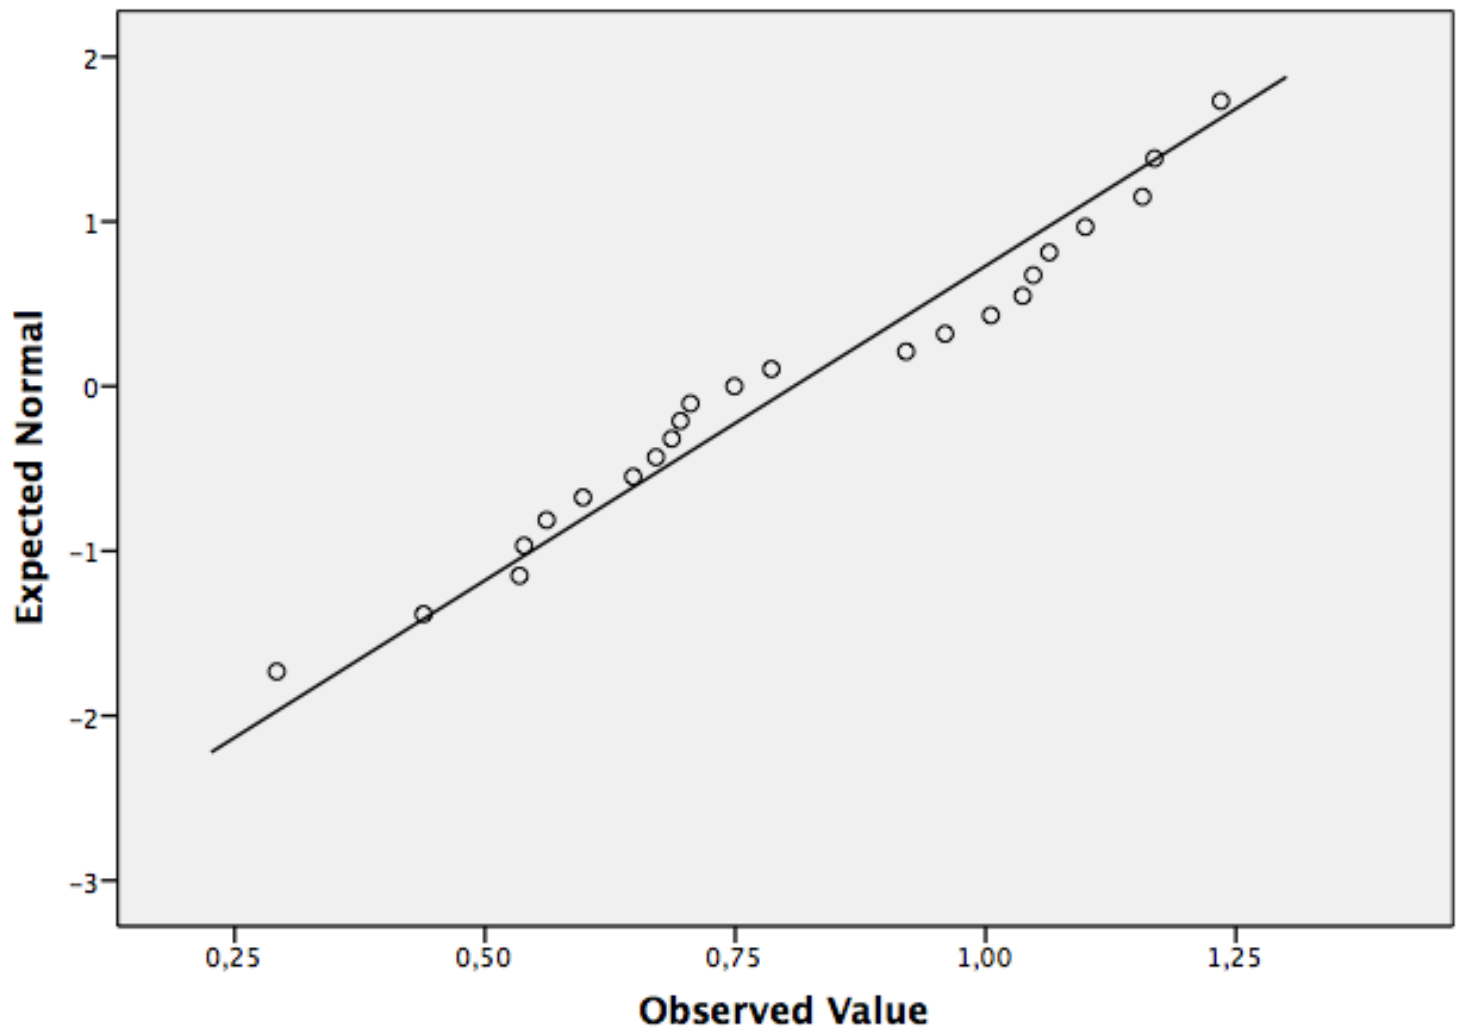

## Normal Q-Q Plots

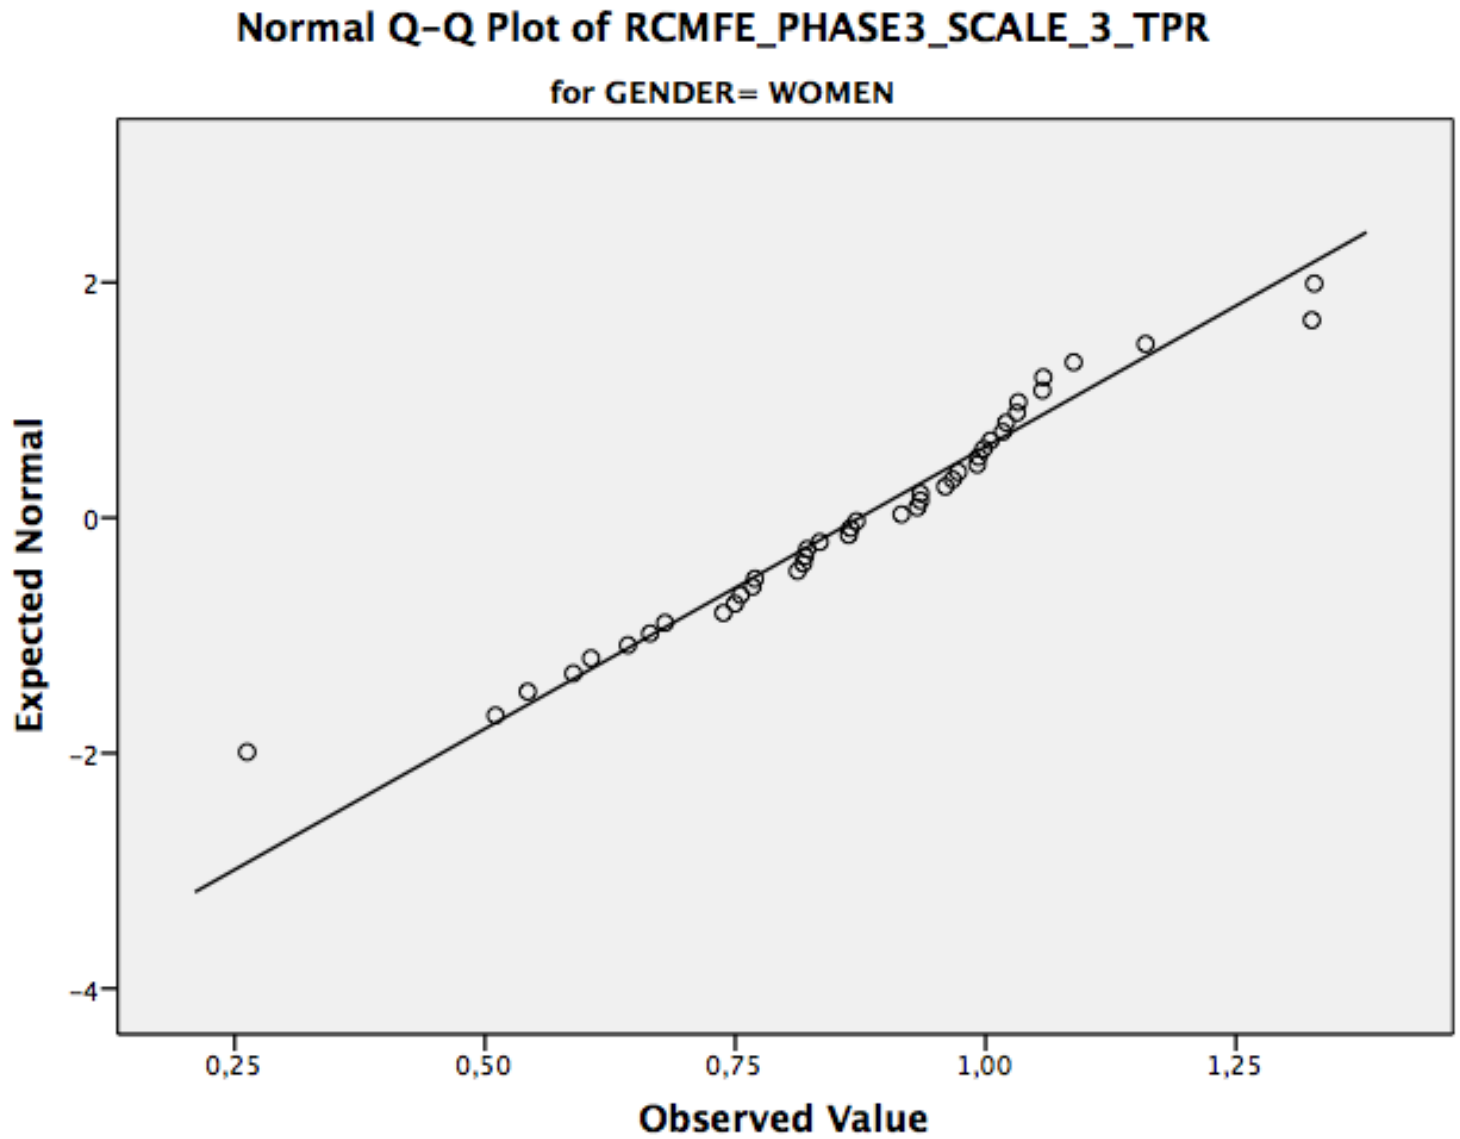

# Normal Q-Q Plot of RCMFE\_PHASE3\_SCALE\_3\_TPR

for GENDER= MEN

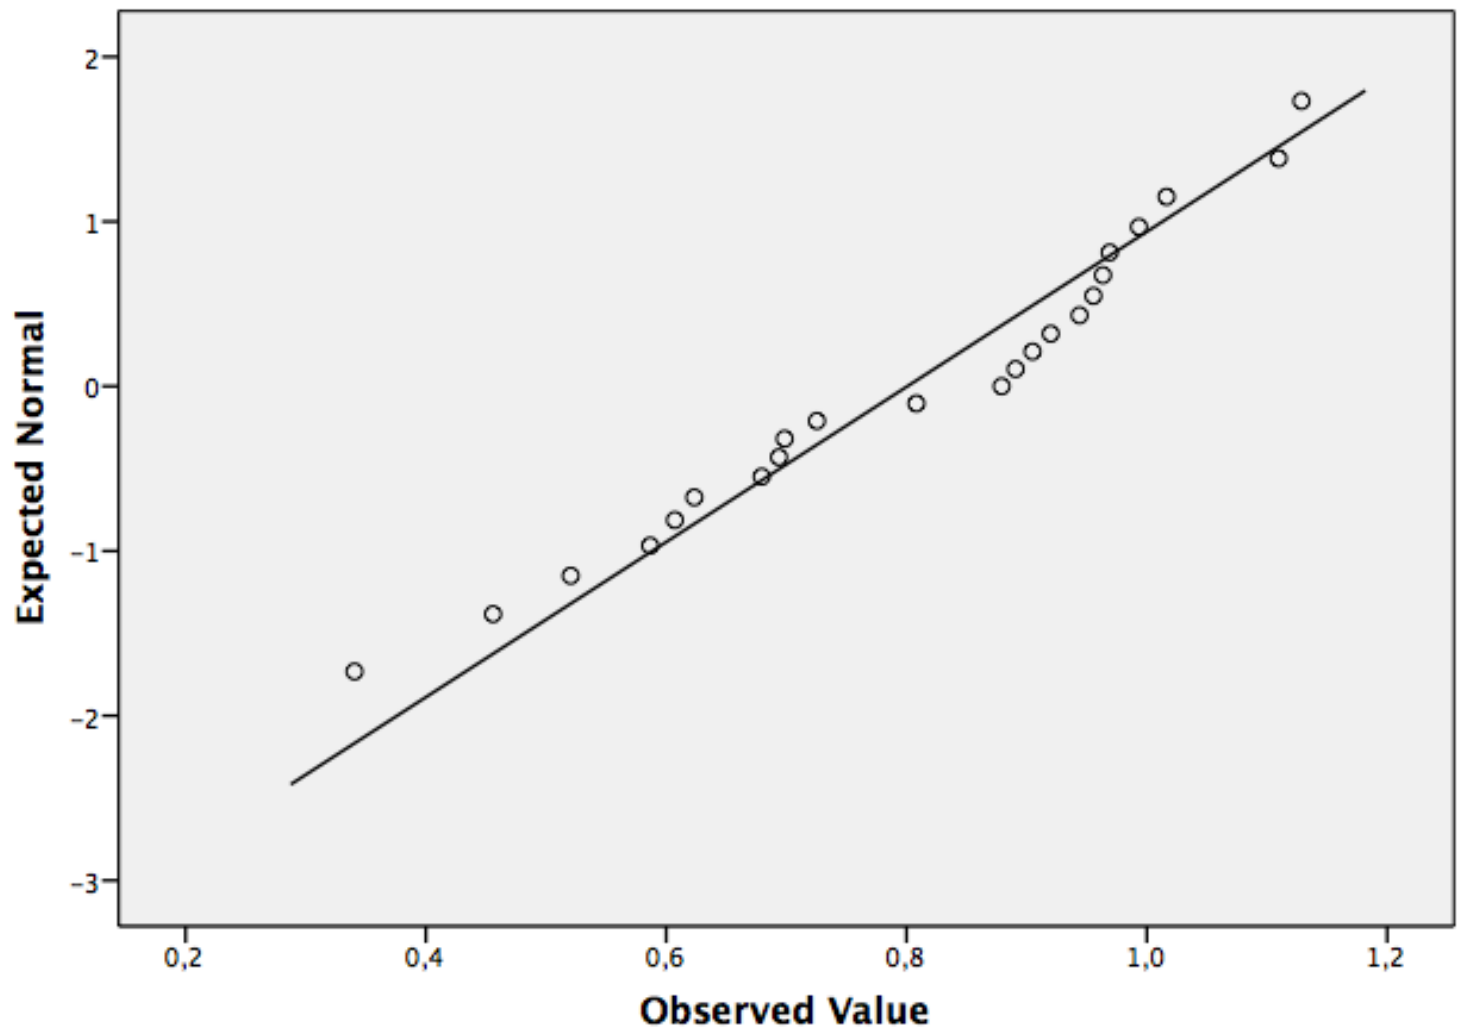

Normal Q-Q Plots

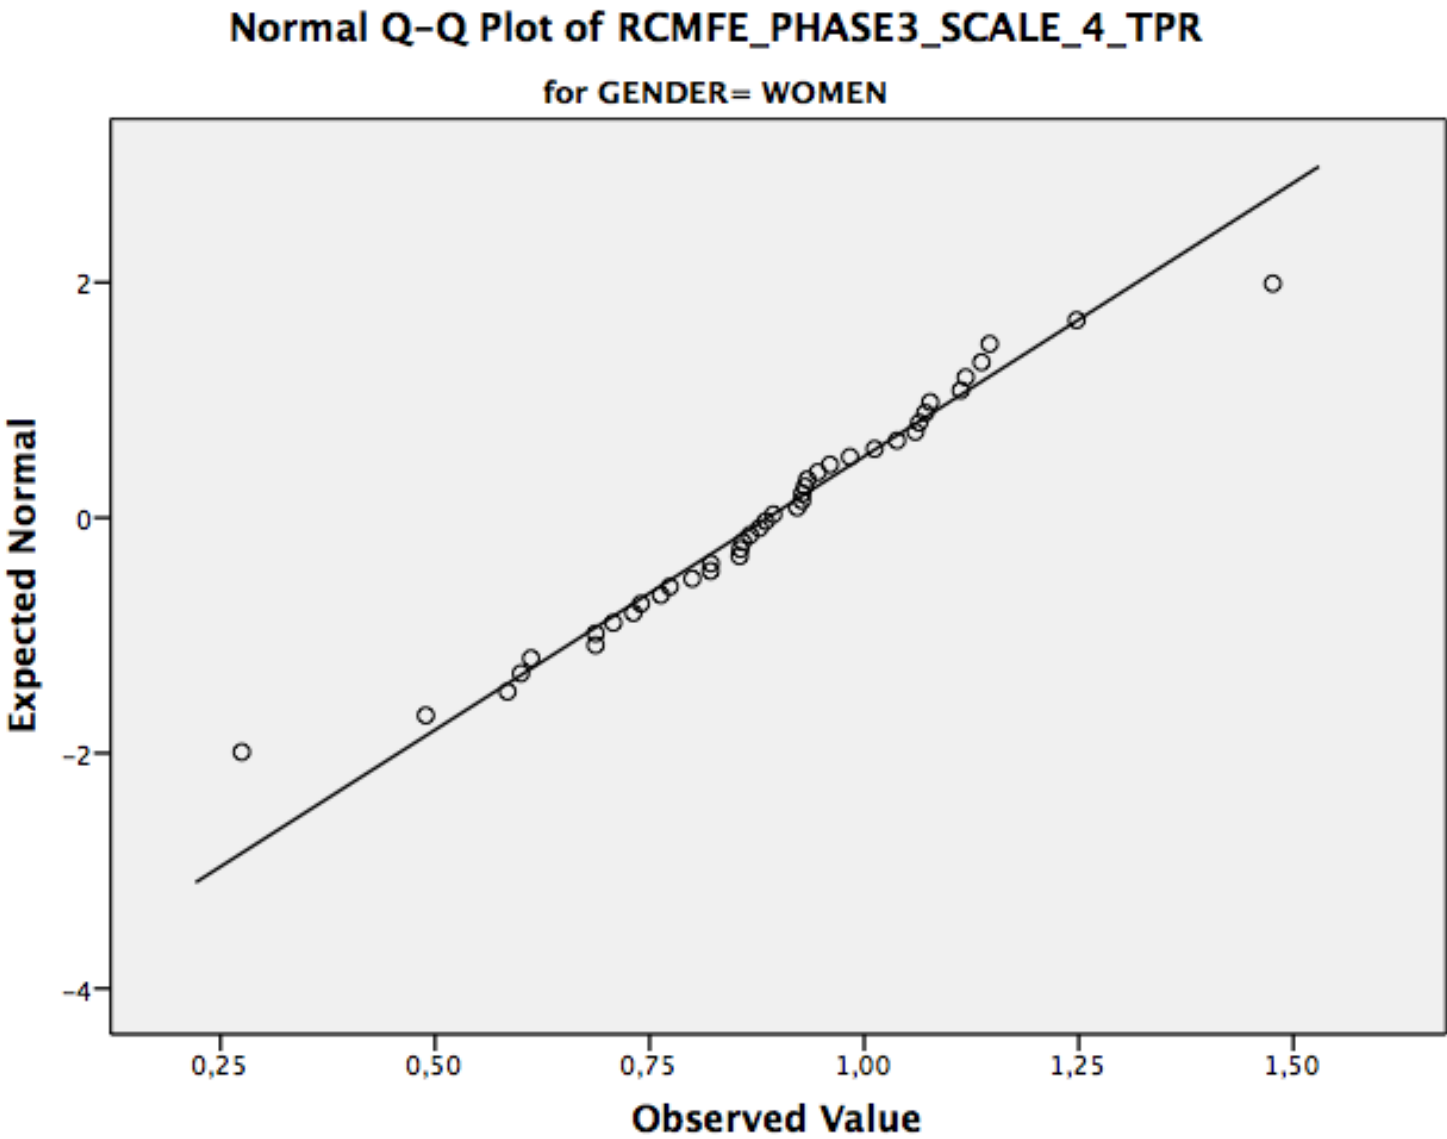

# Normal Q-Q Plot of RCMFE\_PHASE3\_SCALE\_4\_TPR

for GENDER= MEN

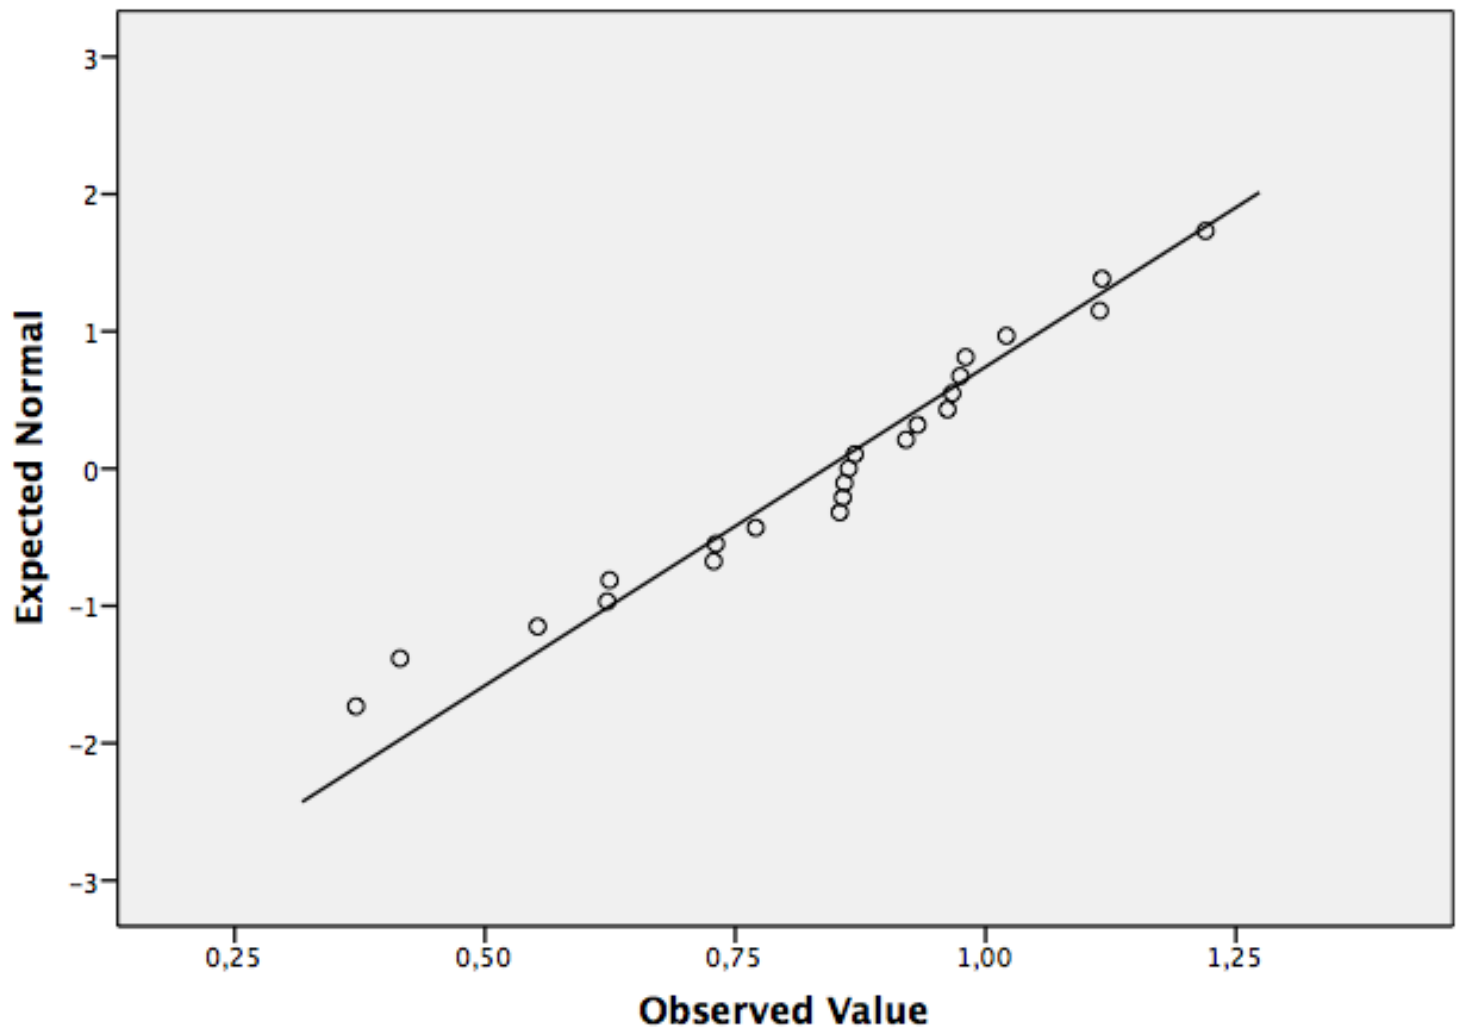

Normal Q-Q Plots

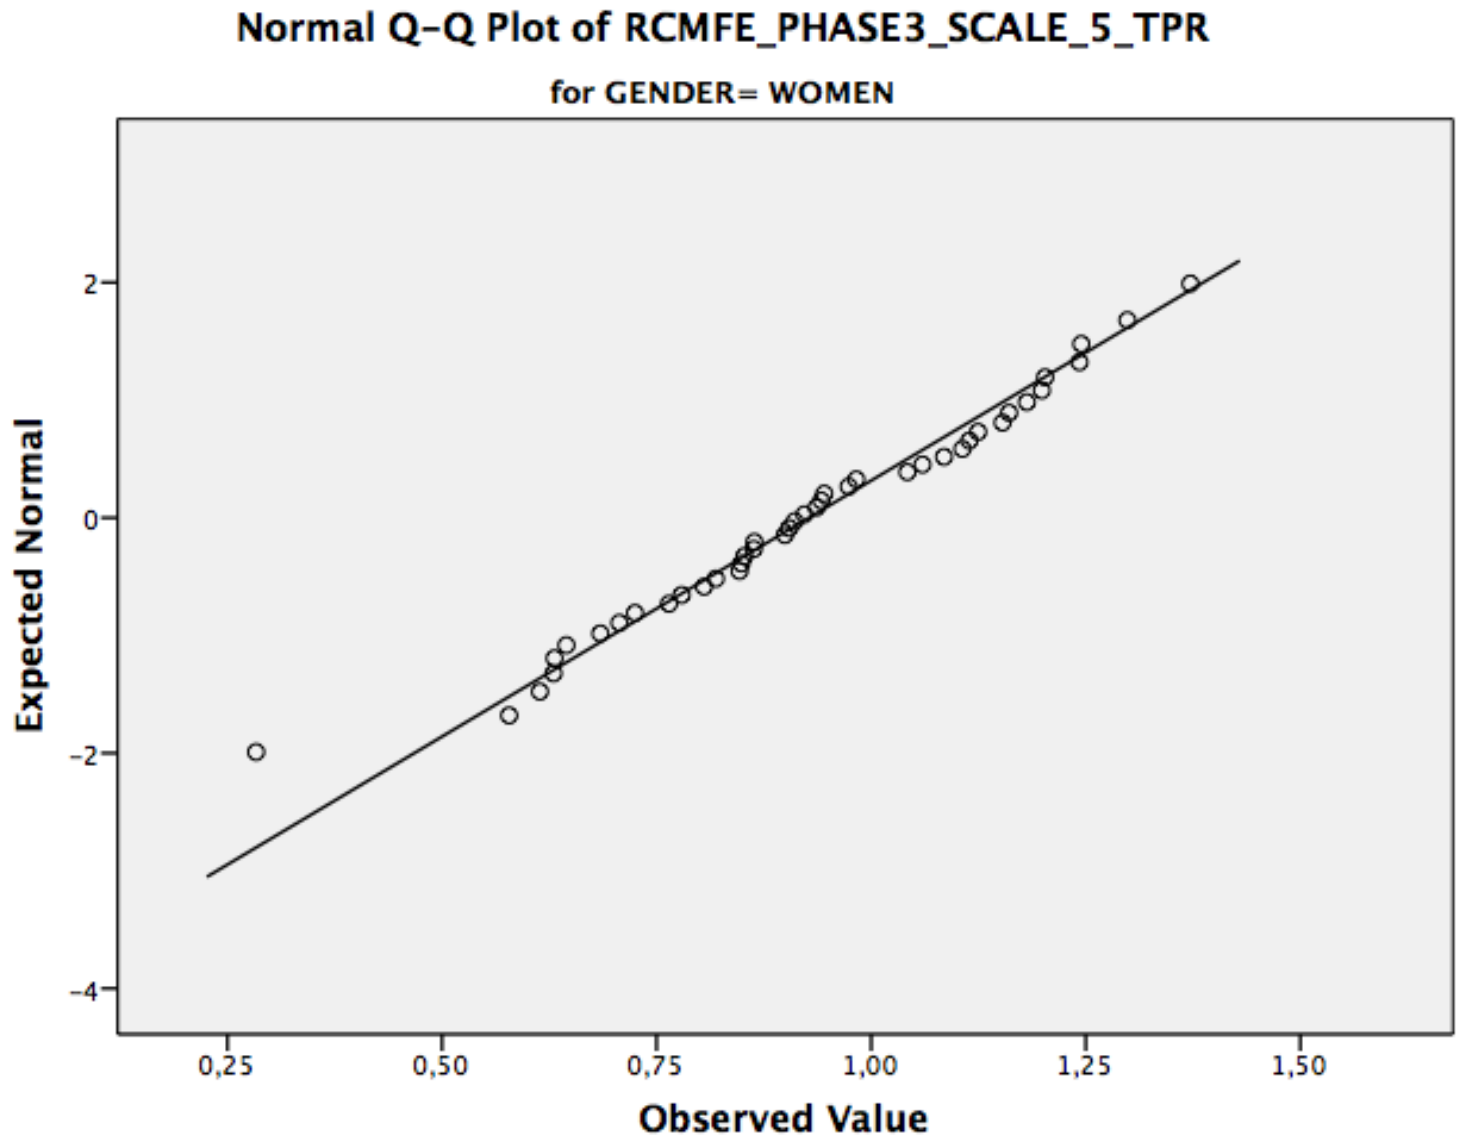



# Normal Q-Q Plot of RCMFE\_PHASE3\_SCALE\_5\_TPR

for GENDER= MEN

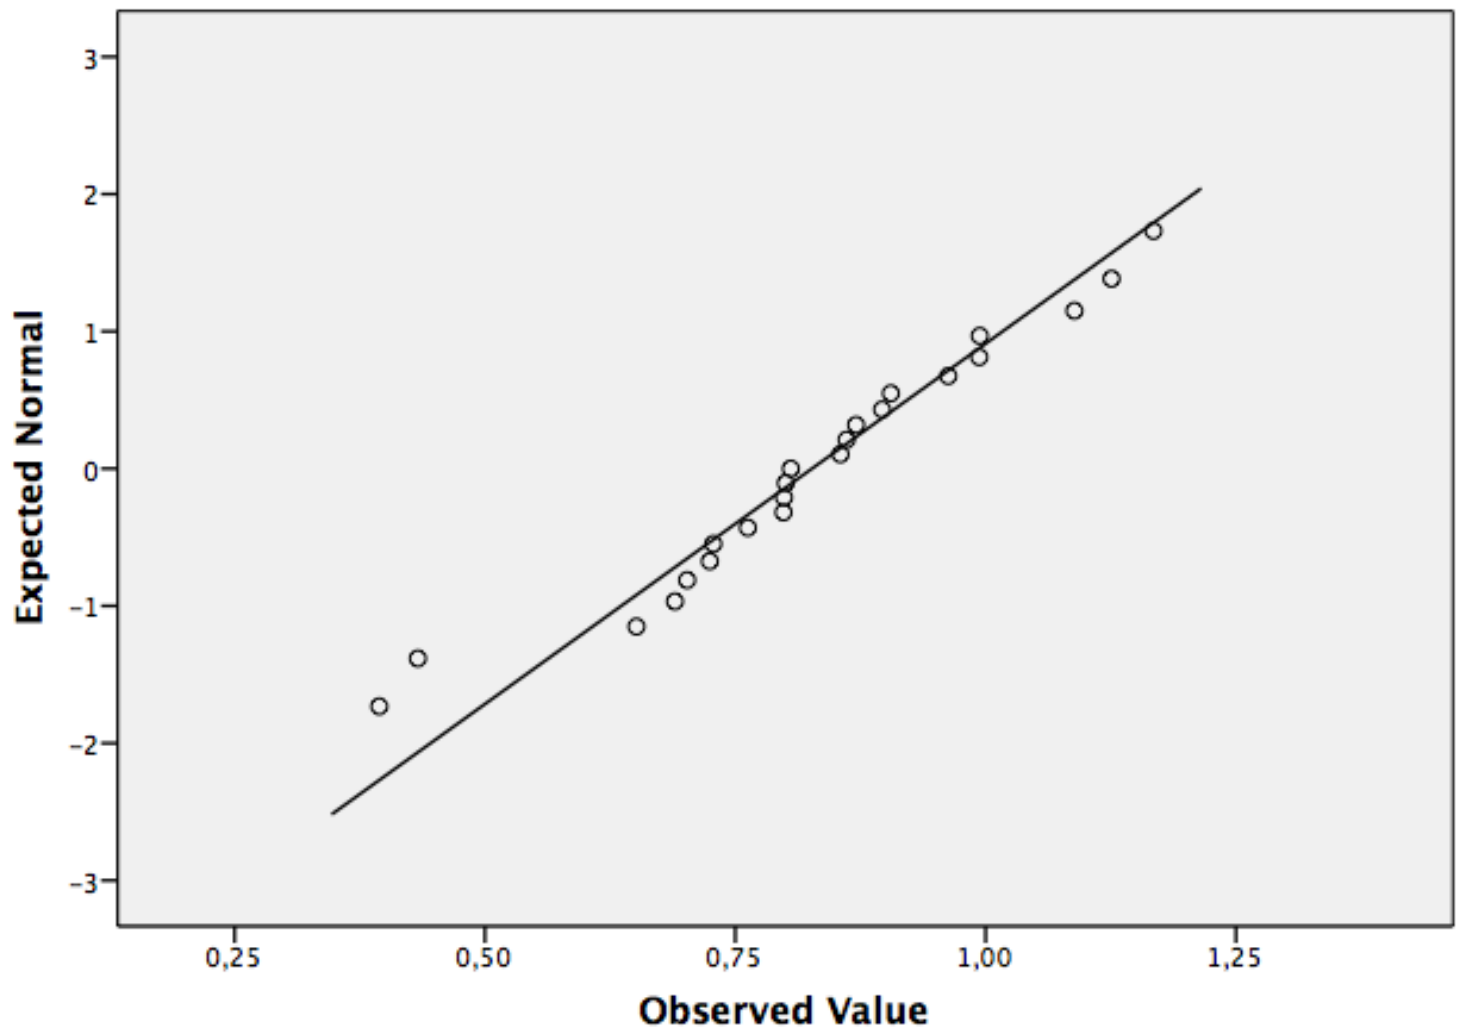

Normal Q-Q Plots

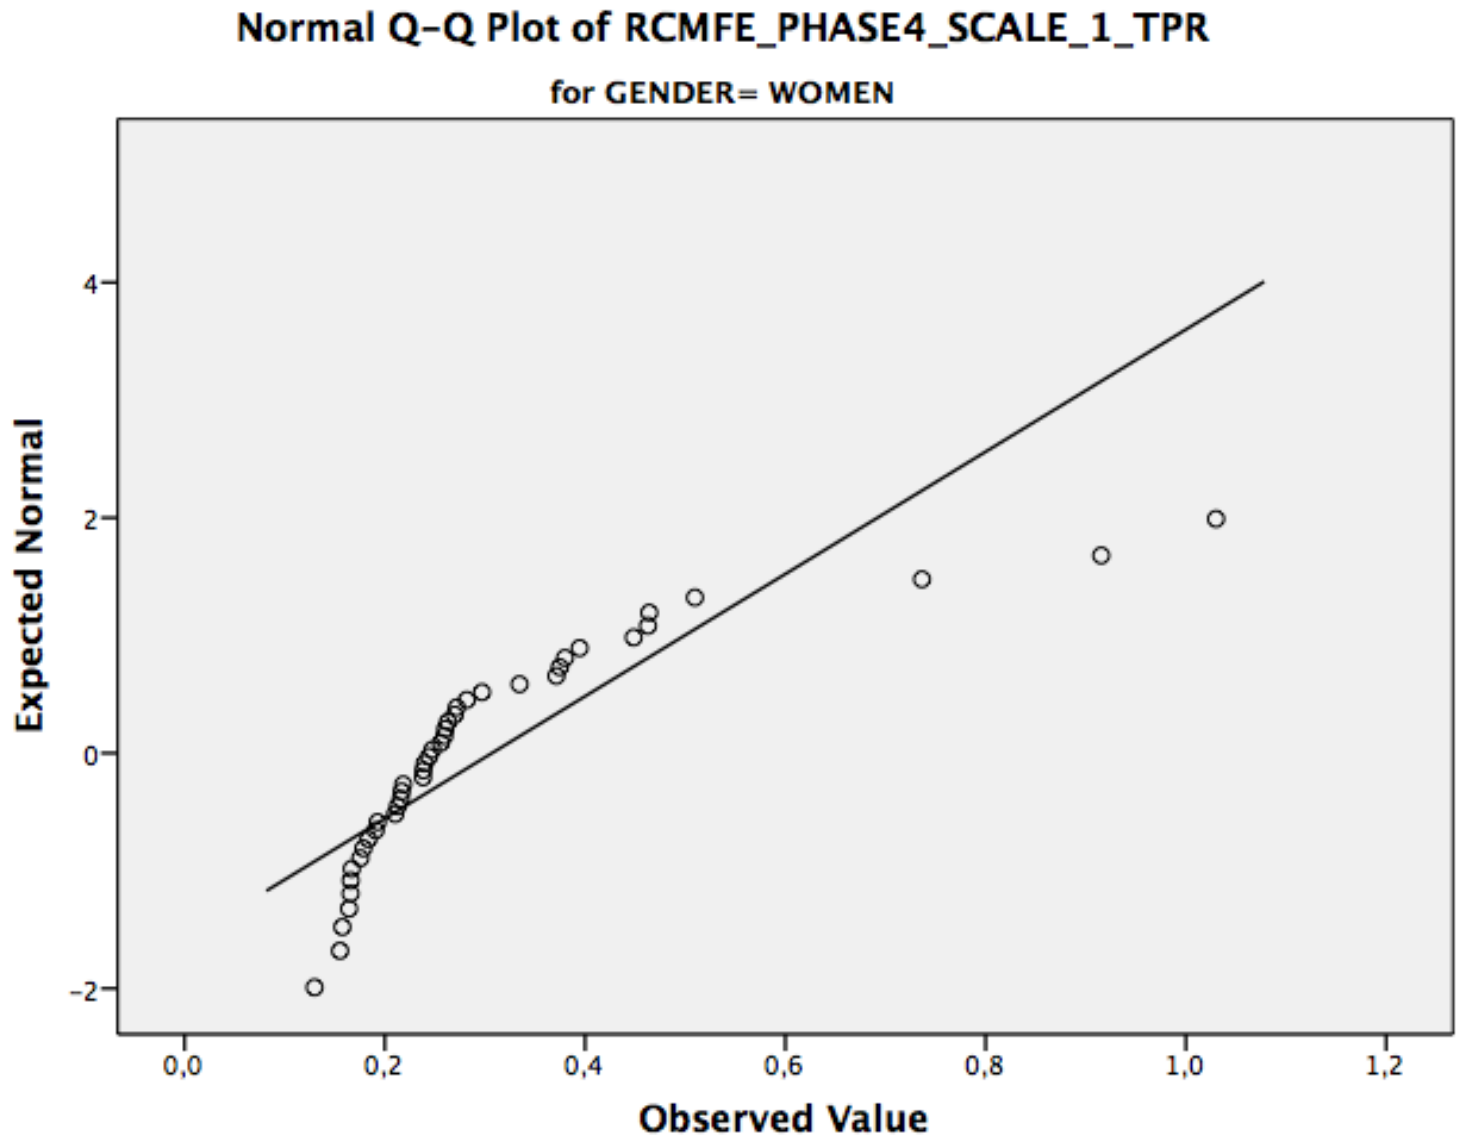

# Normal Q-Q Plot of RCMFE\_PHASE4\_SCALE\_1\_TPR

for GENDER= MEN

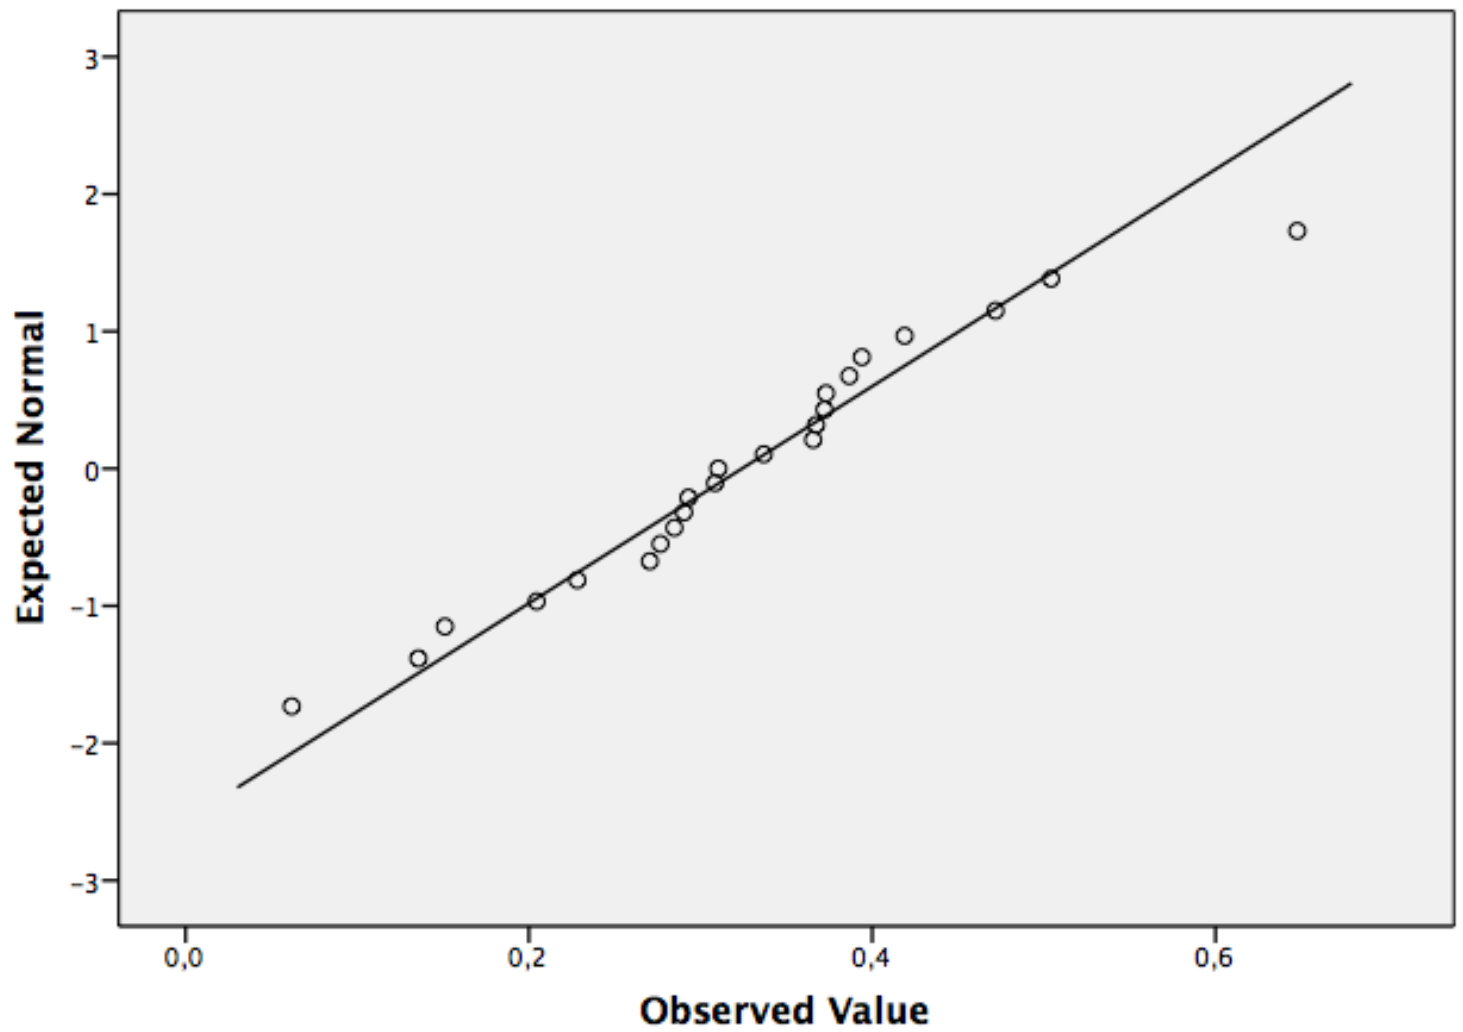

Normal Q-Q Plots

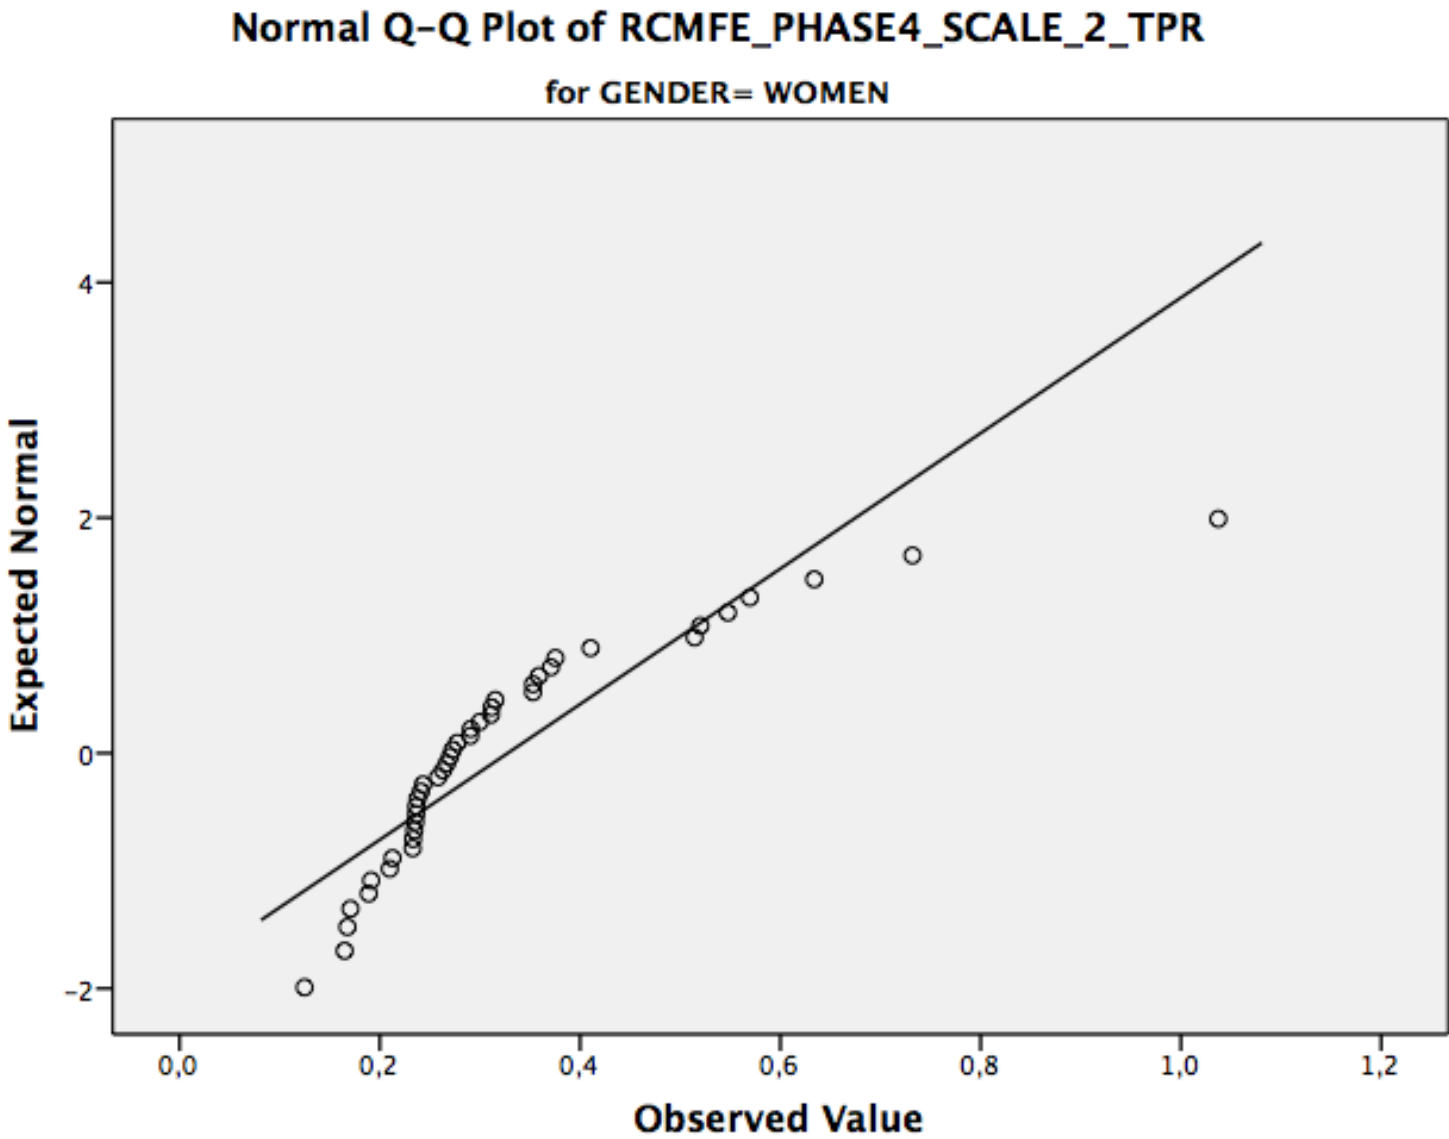

# Normal Q-Q Plot of RCMFE\_PHASE4\_SCALE\_2\_TPR

for GENDER= MEN

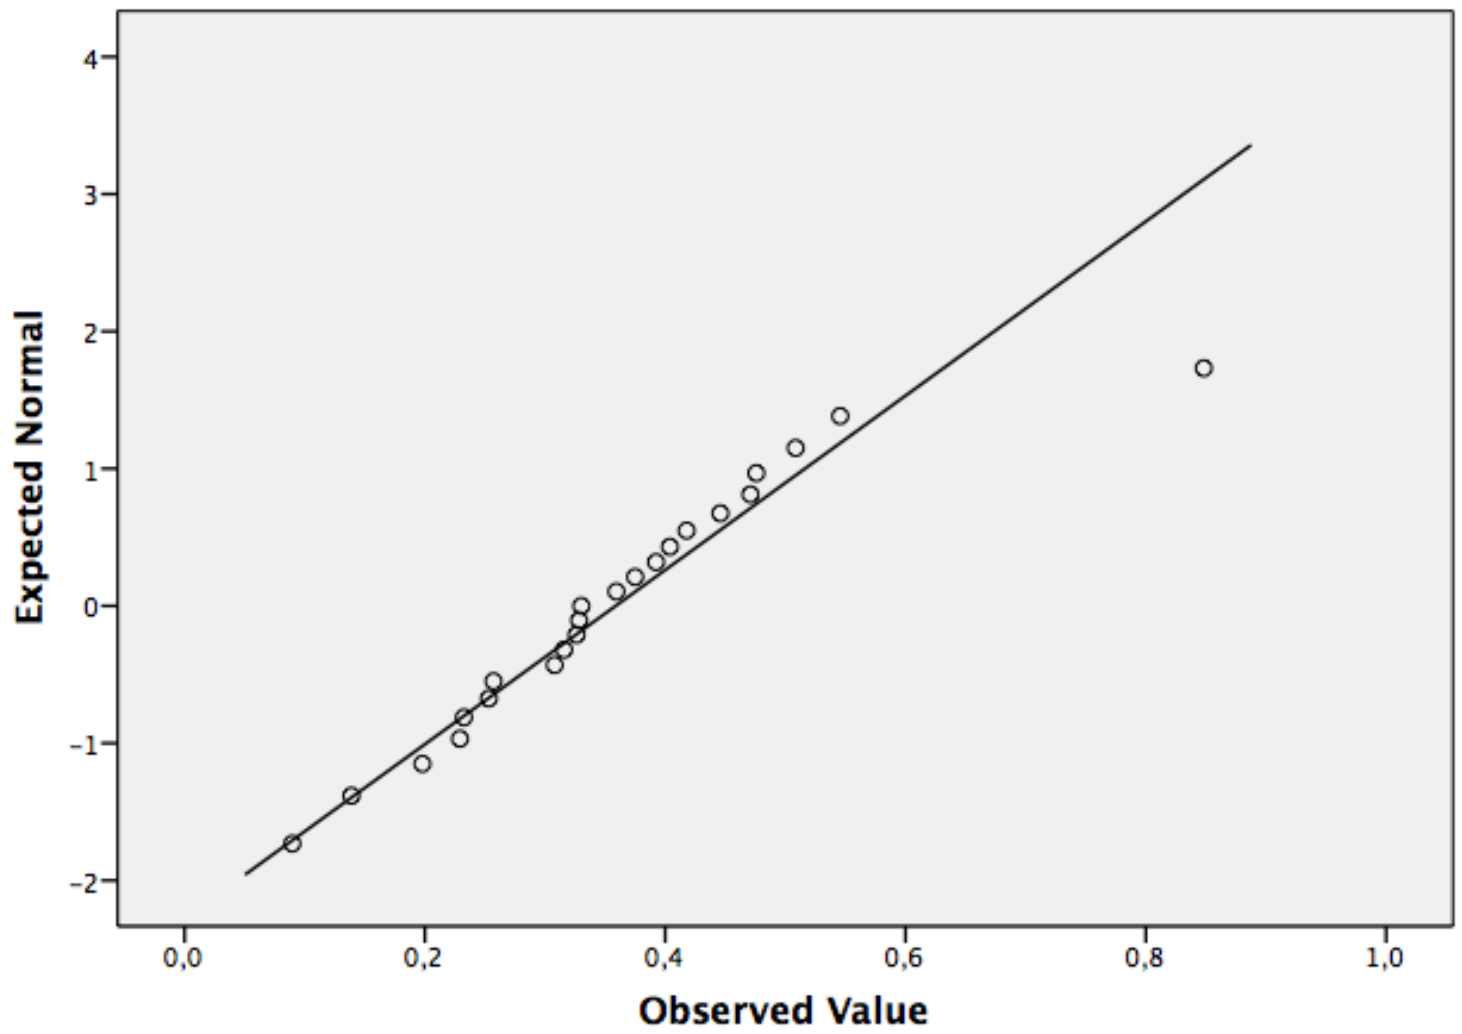

## Normal Q-Q Plots

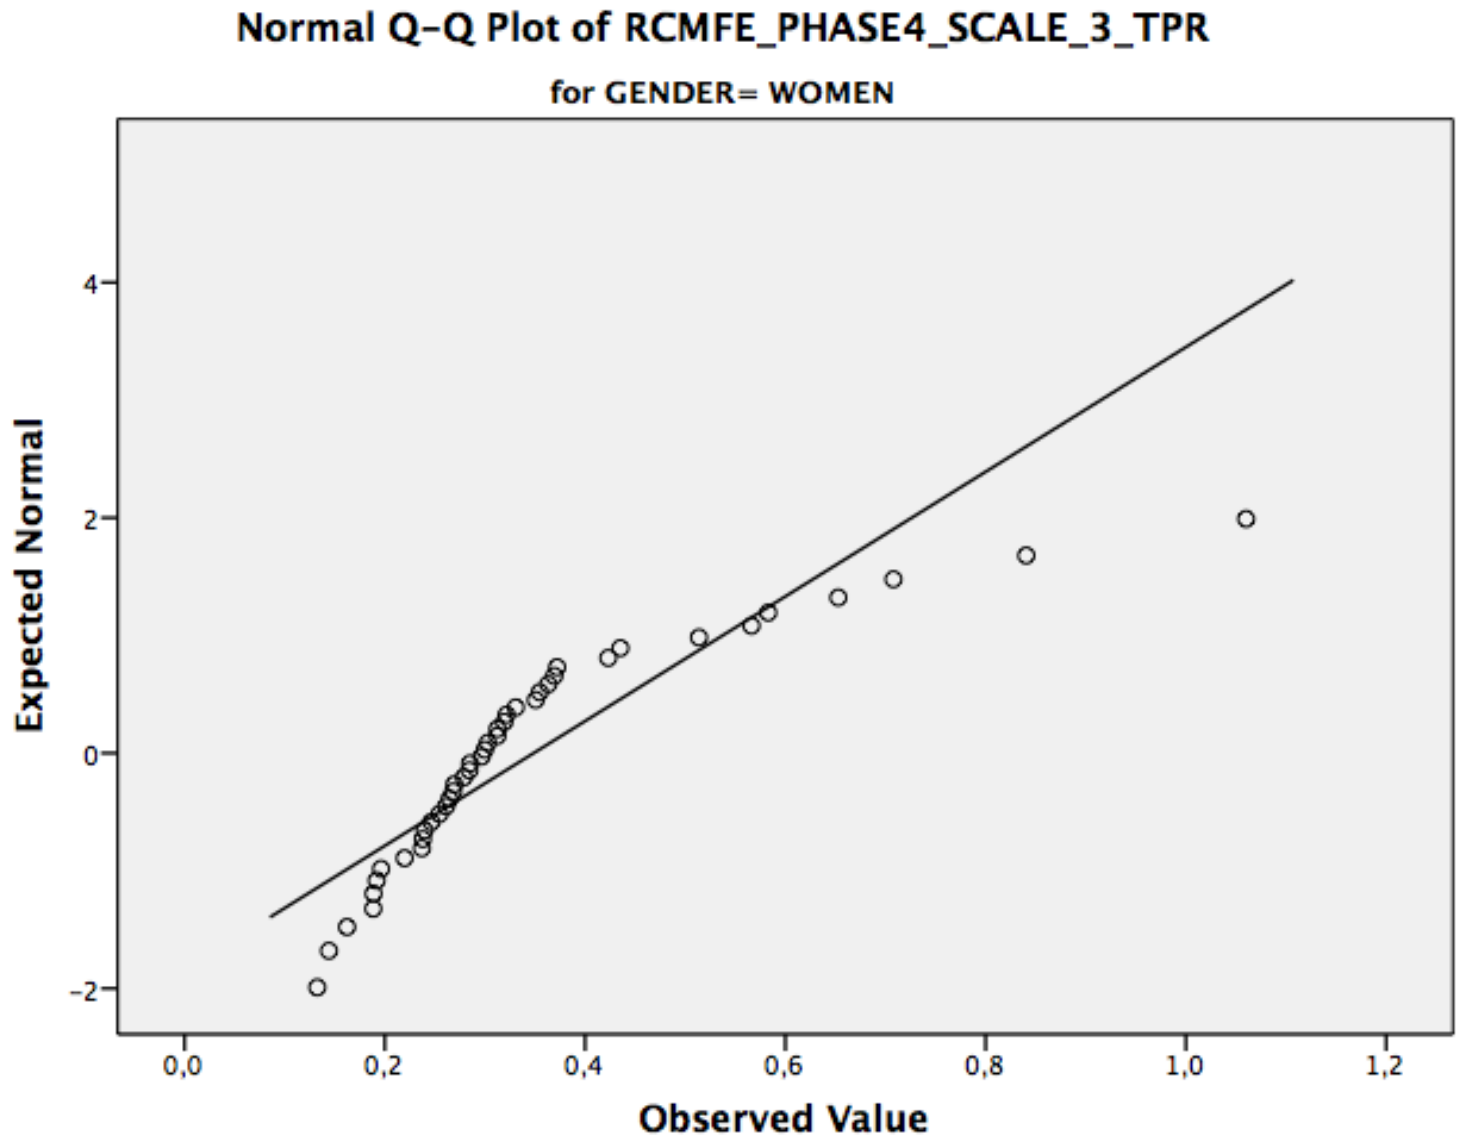

# Normal Q-Q Plot of RCMFE\_PHASE4\_SCALE\_3\_TPR

for GENDER= MEN

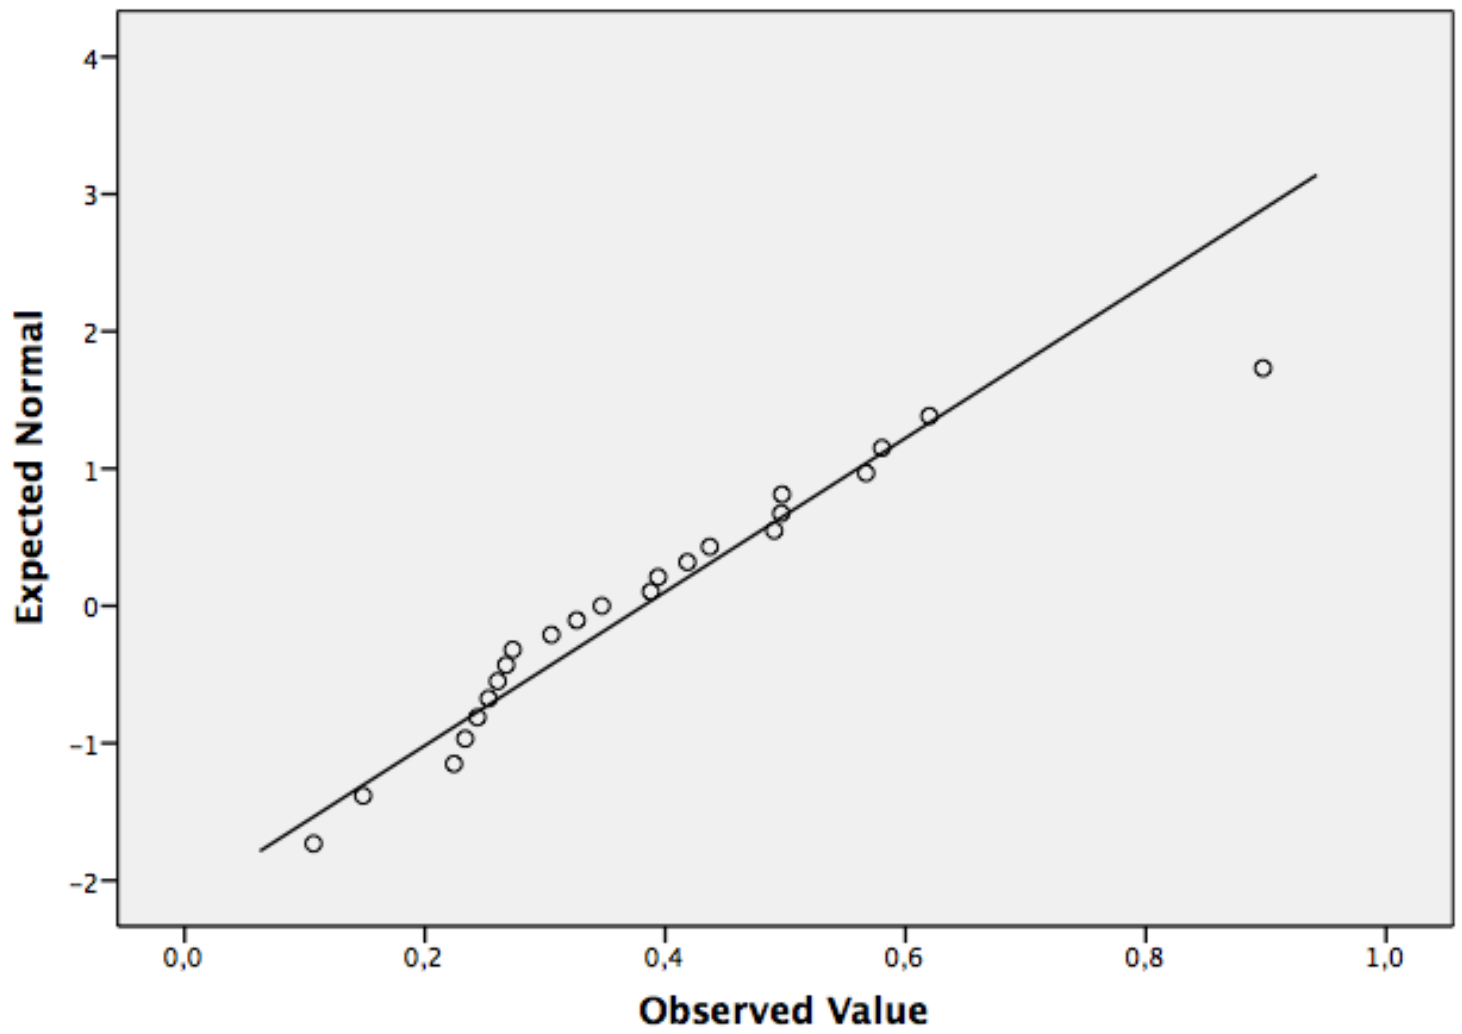

Normal Q-Q Plots

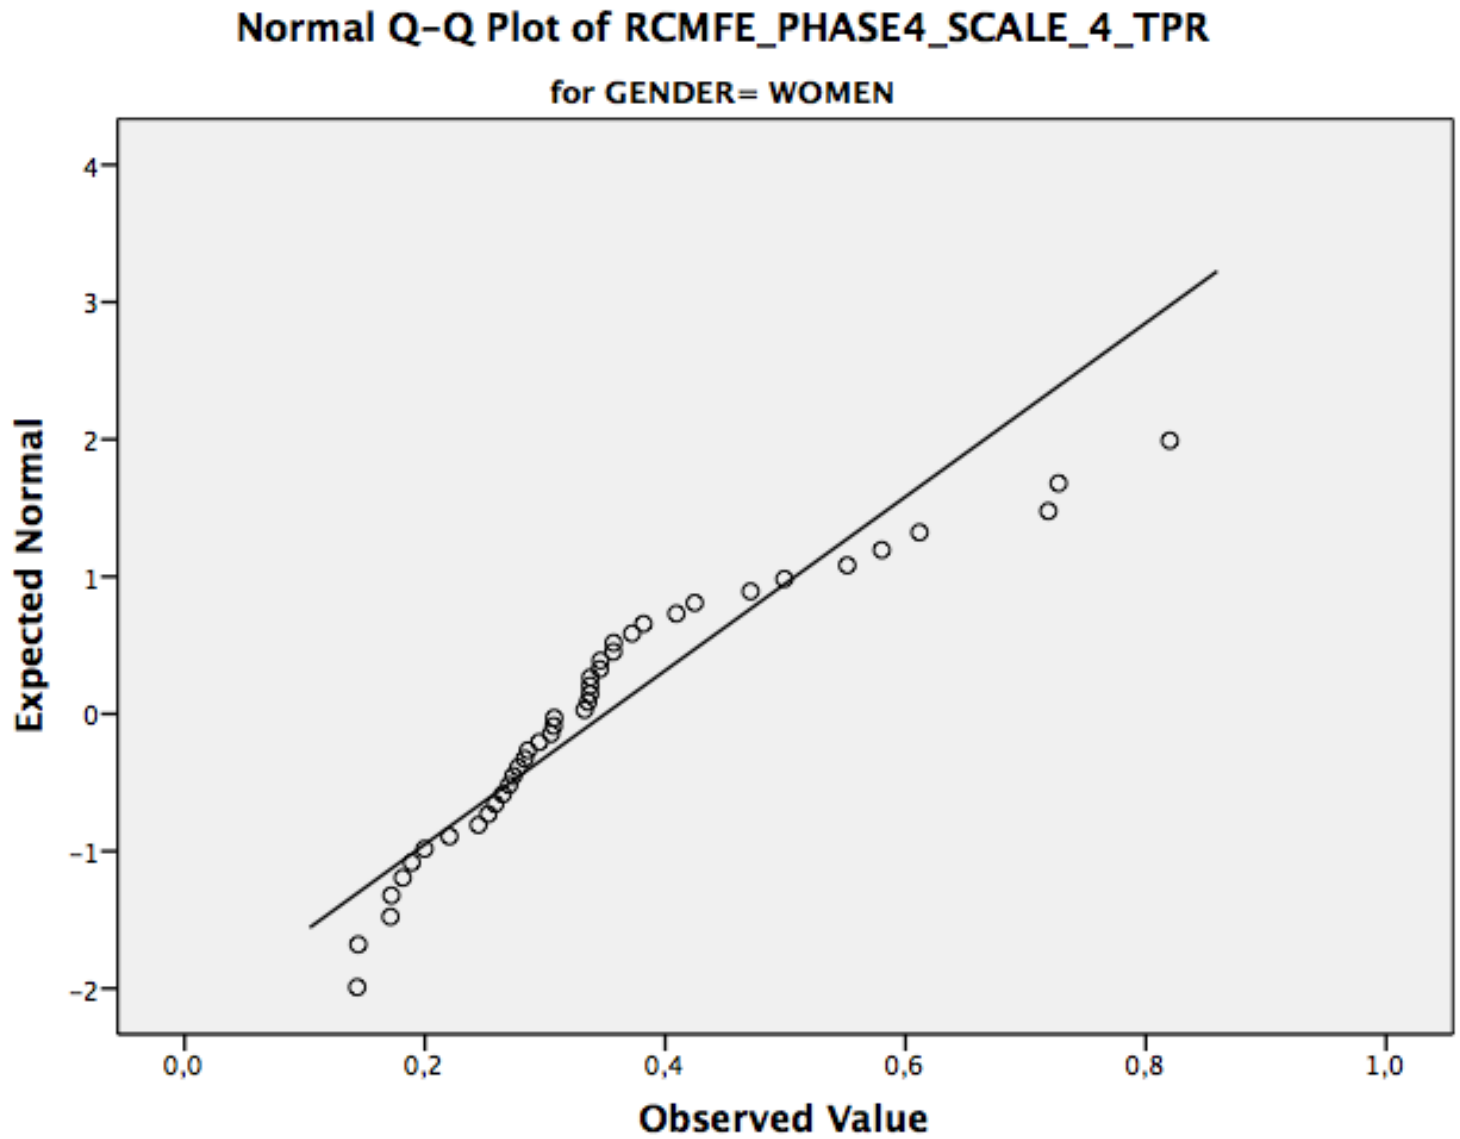



# Normal Q-Q Plot of RCMFE\_PHASE4\_SCALE\_4\_TPR

for GENDER= MEN

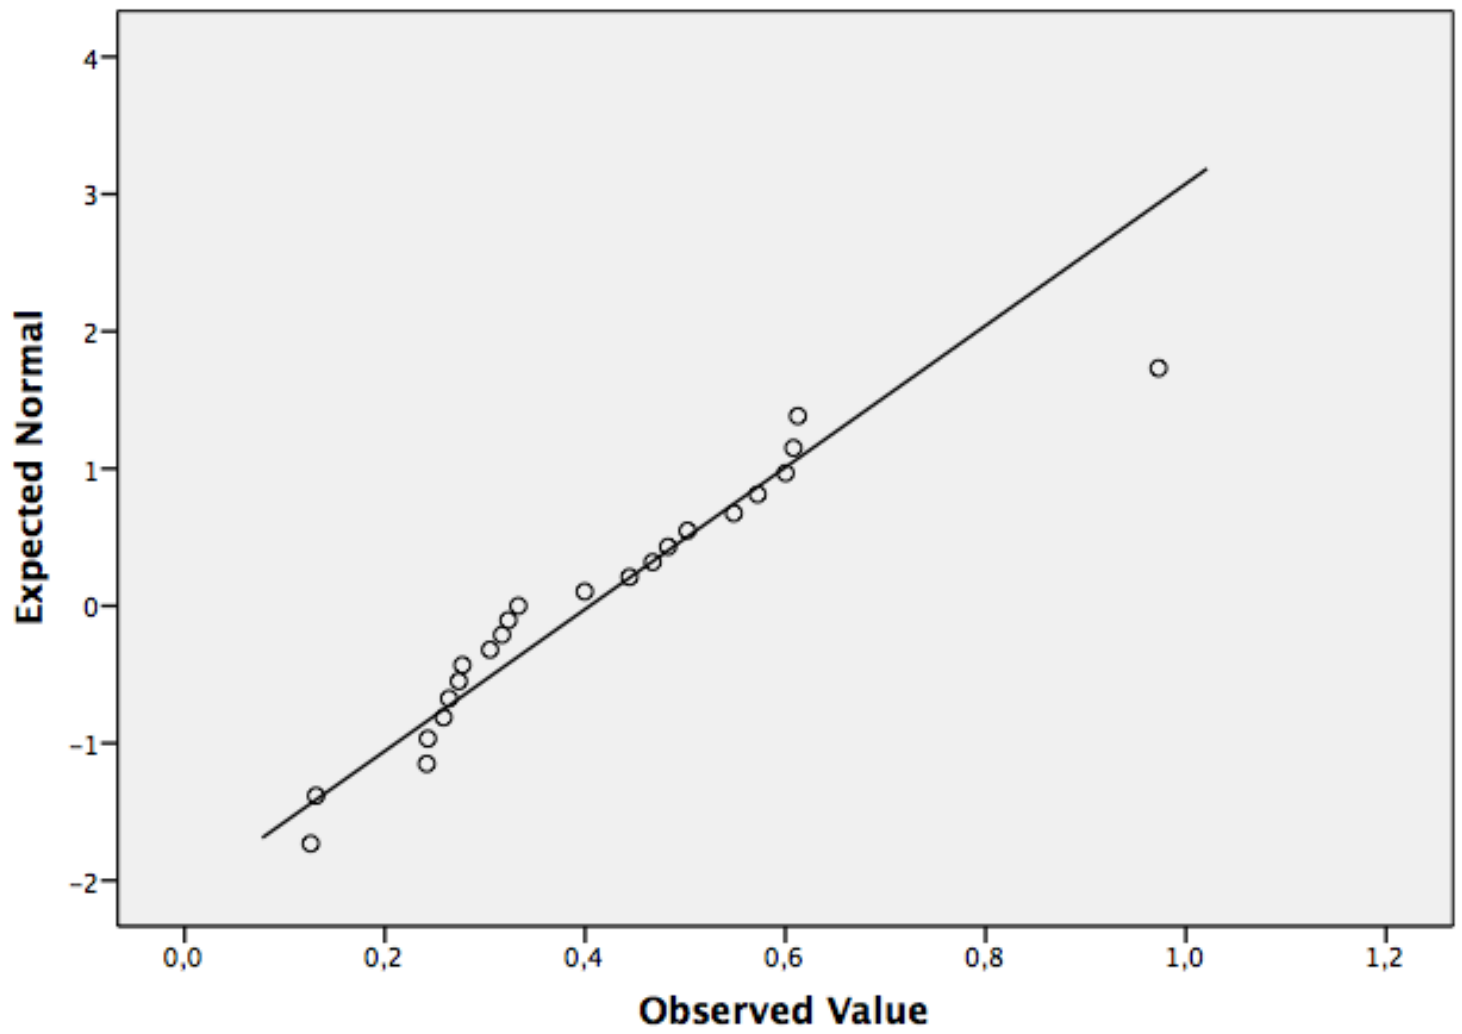

Normal Q-Q Plots

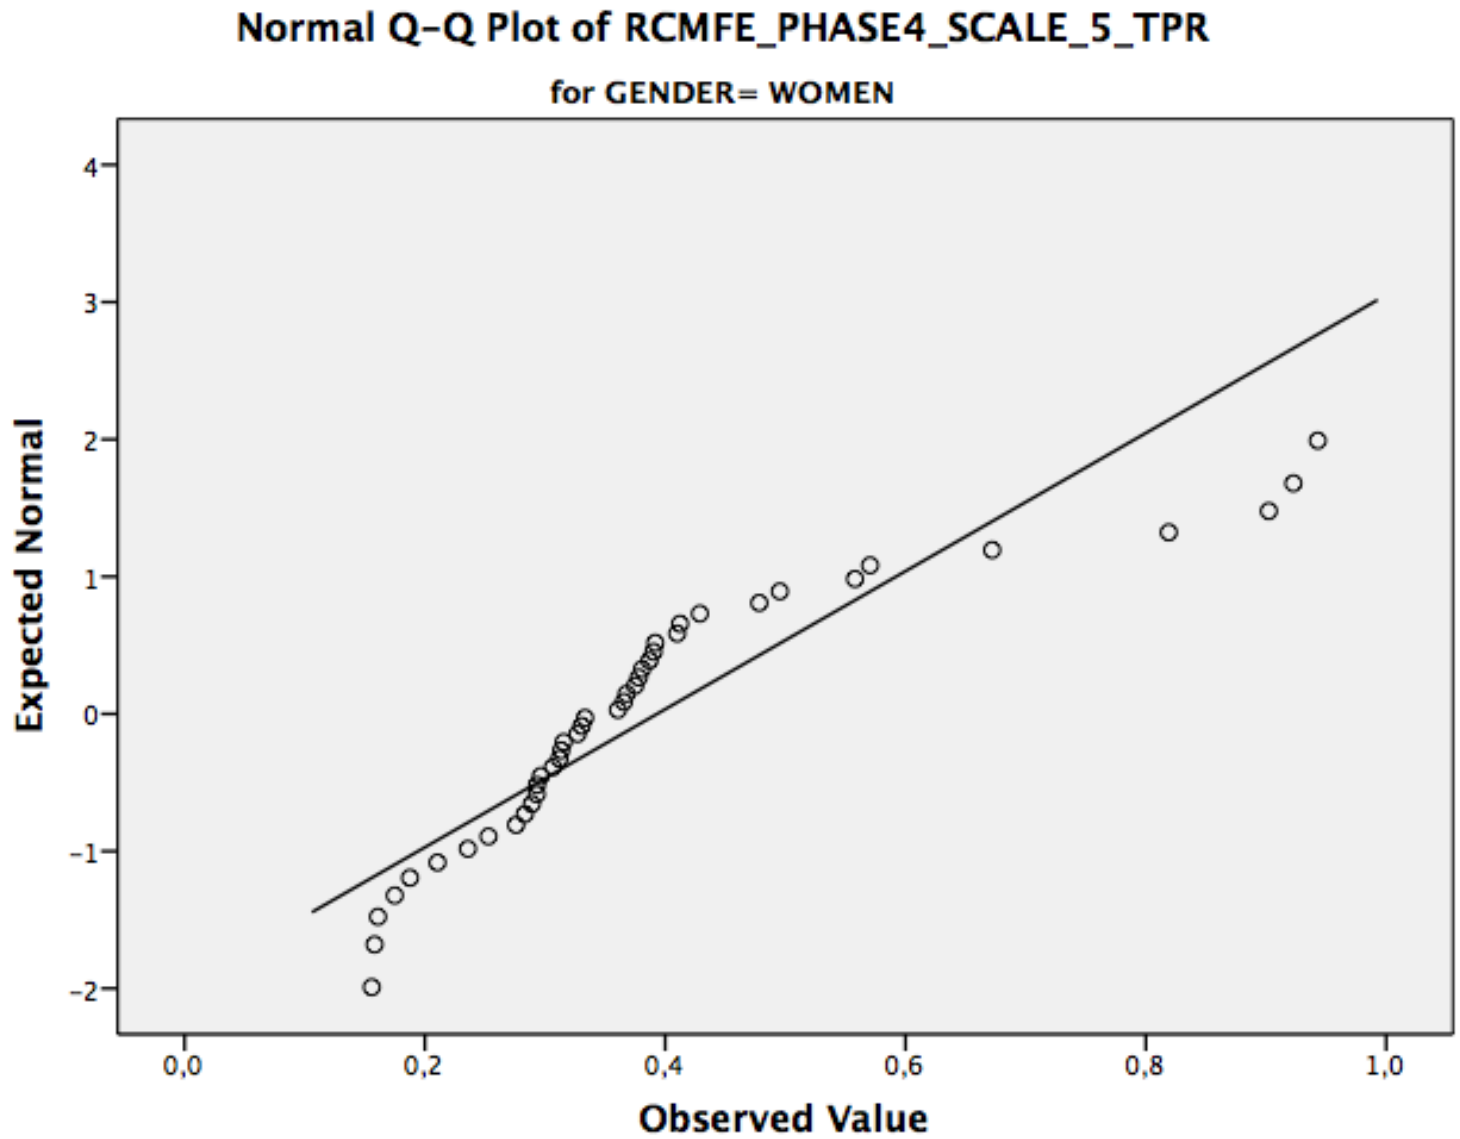

# Normal Q-Q Plot of RCMFE\_PHASE4\_SCALE\_5\_TPR

for GENDER= MEN

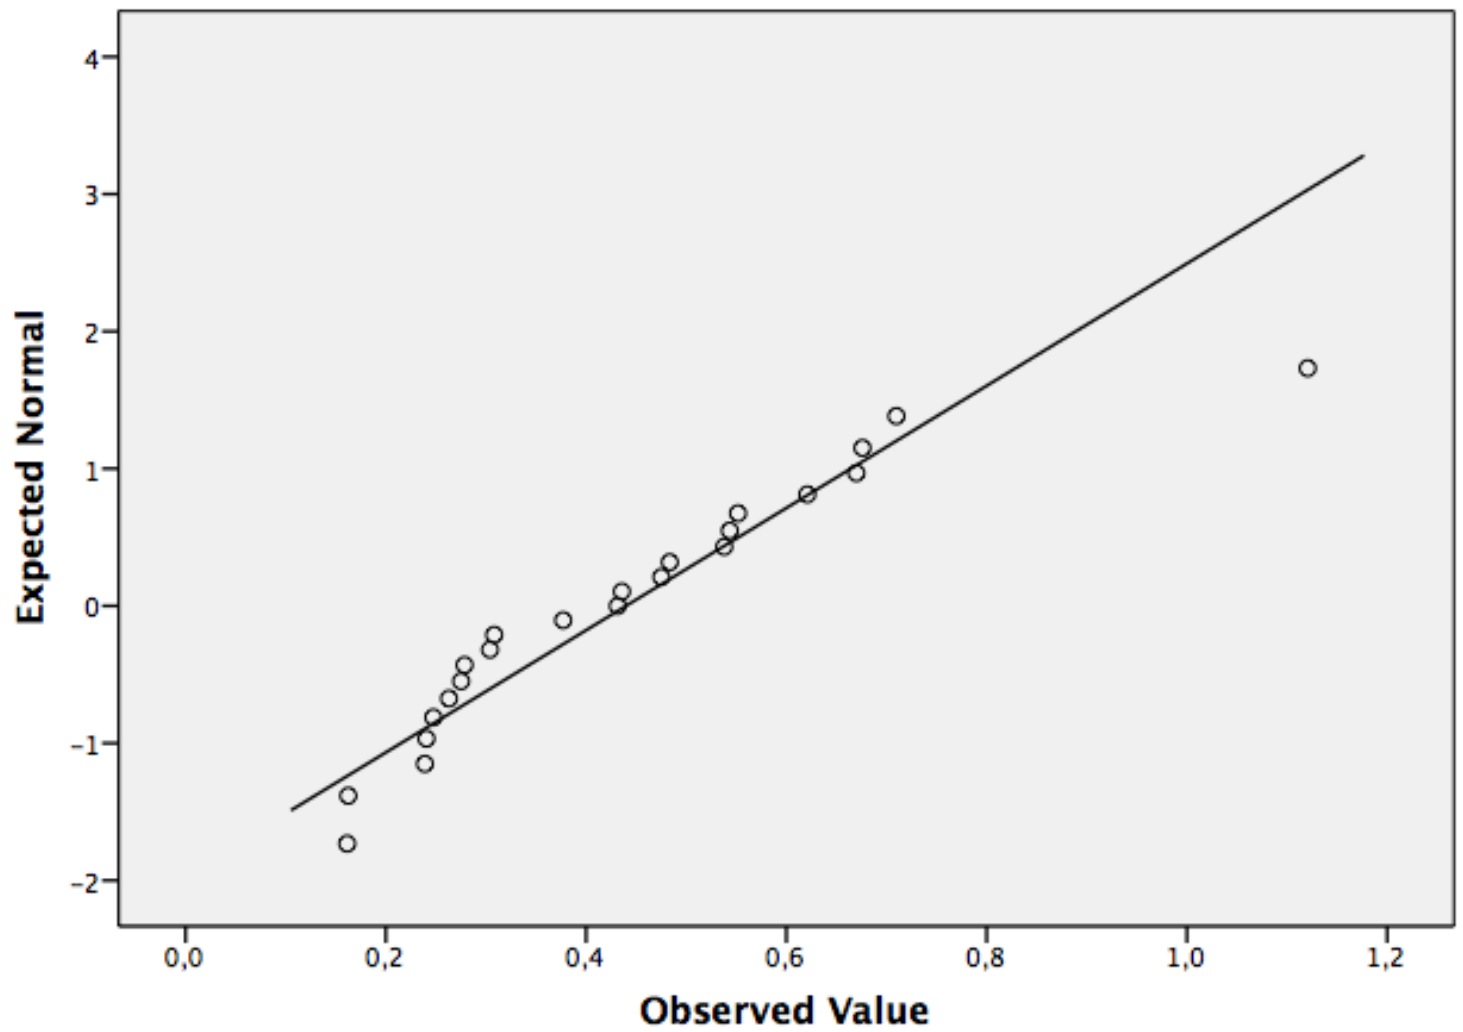

Normal Q-Q Plots

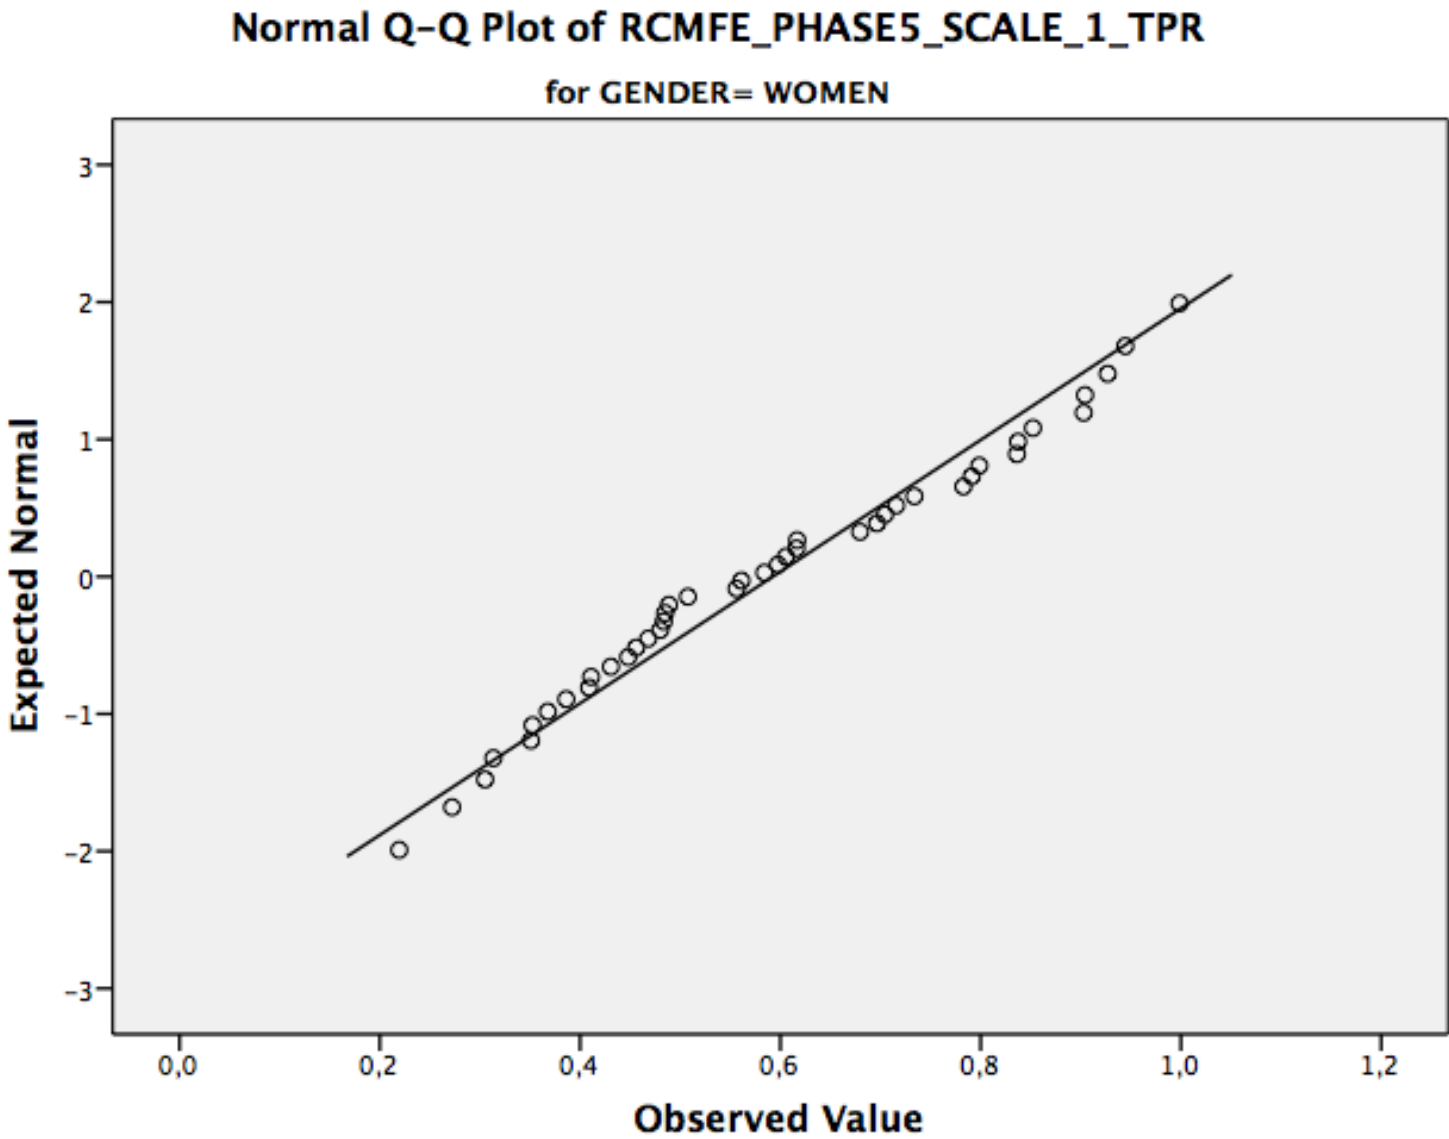

# Normal Q-Q Plot of RCMFE\_PHASE5\_SCALE\_1\_TPR

for GENDER= MEN

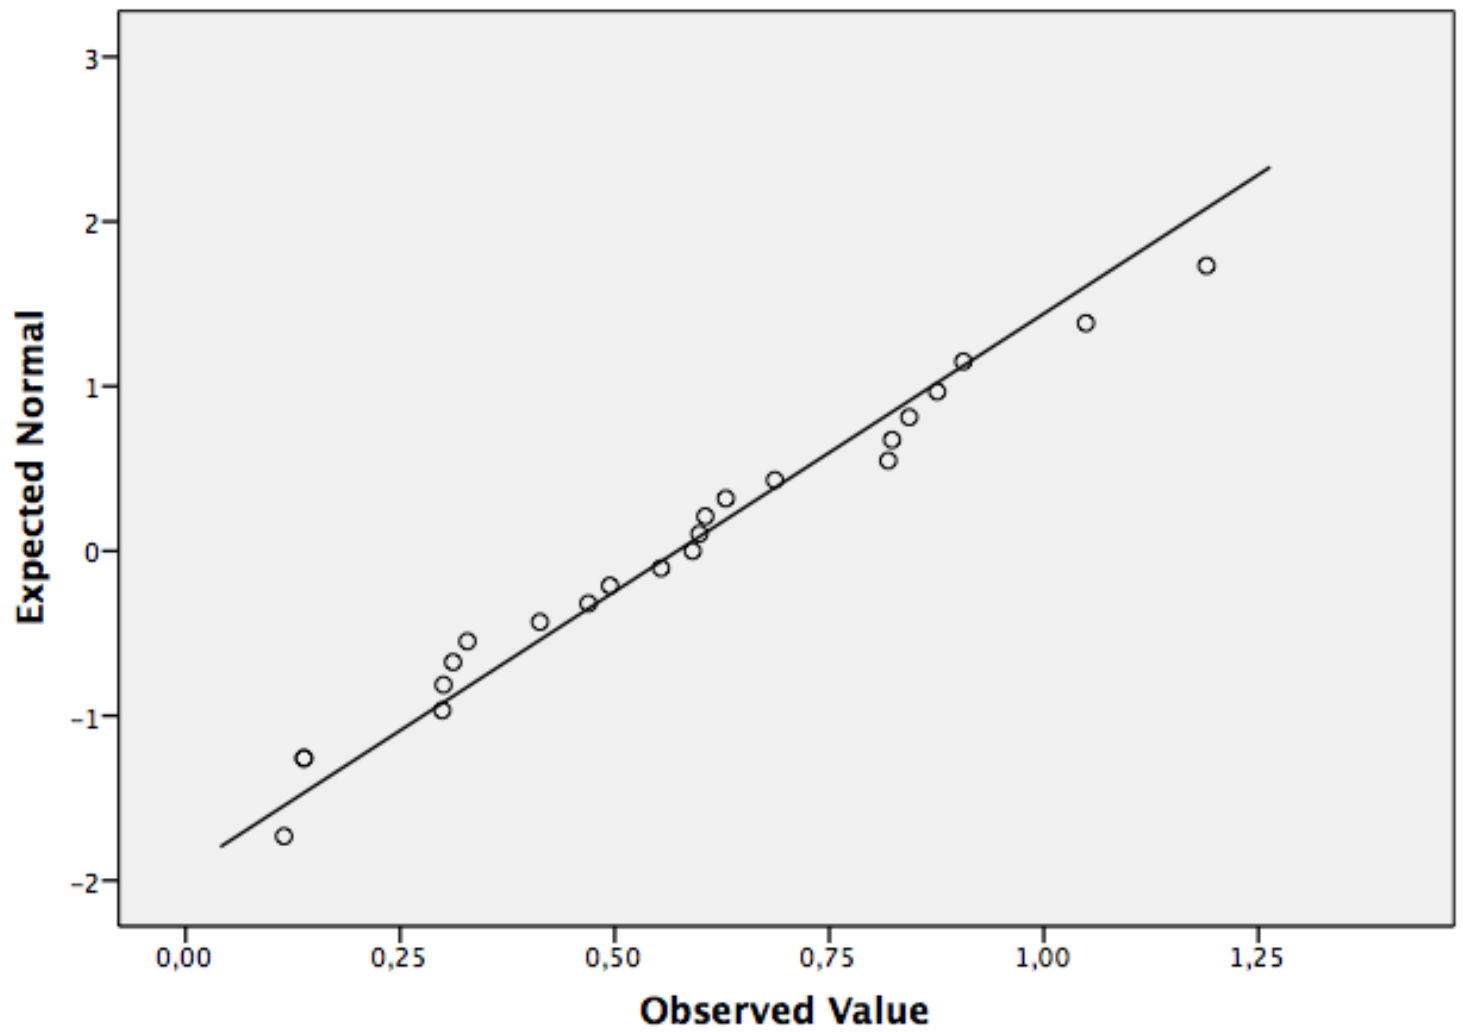

## Normal Q-Q Plots

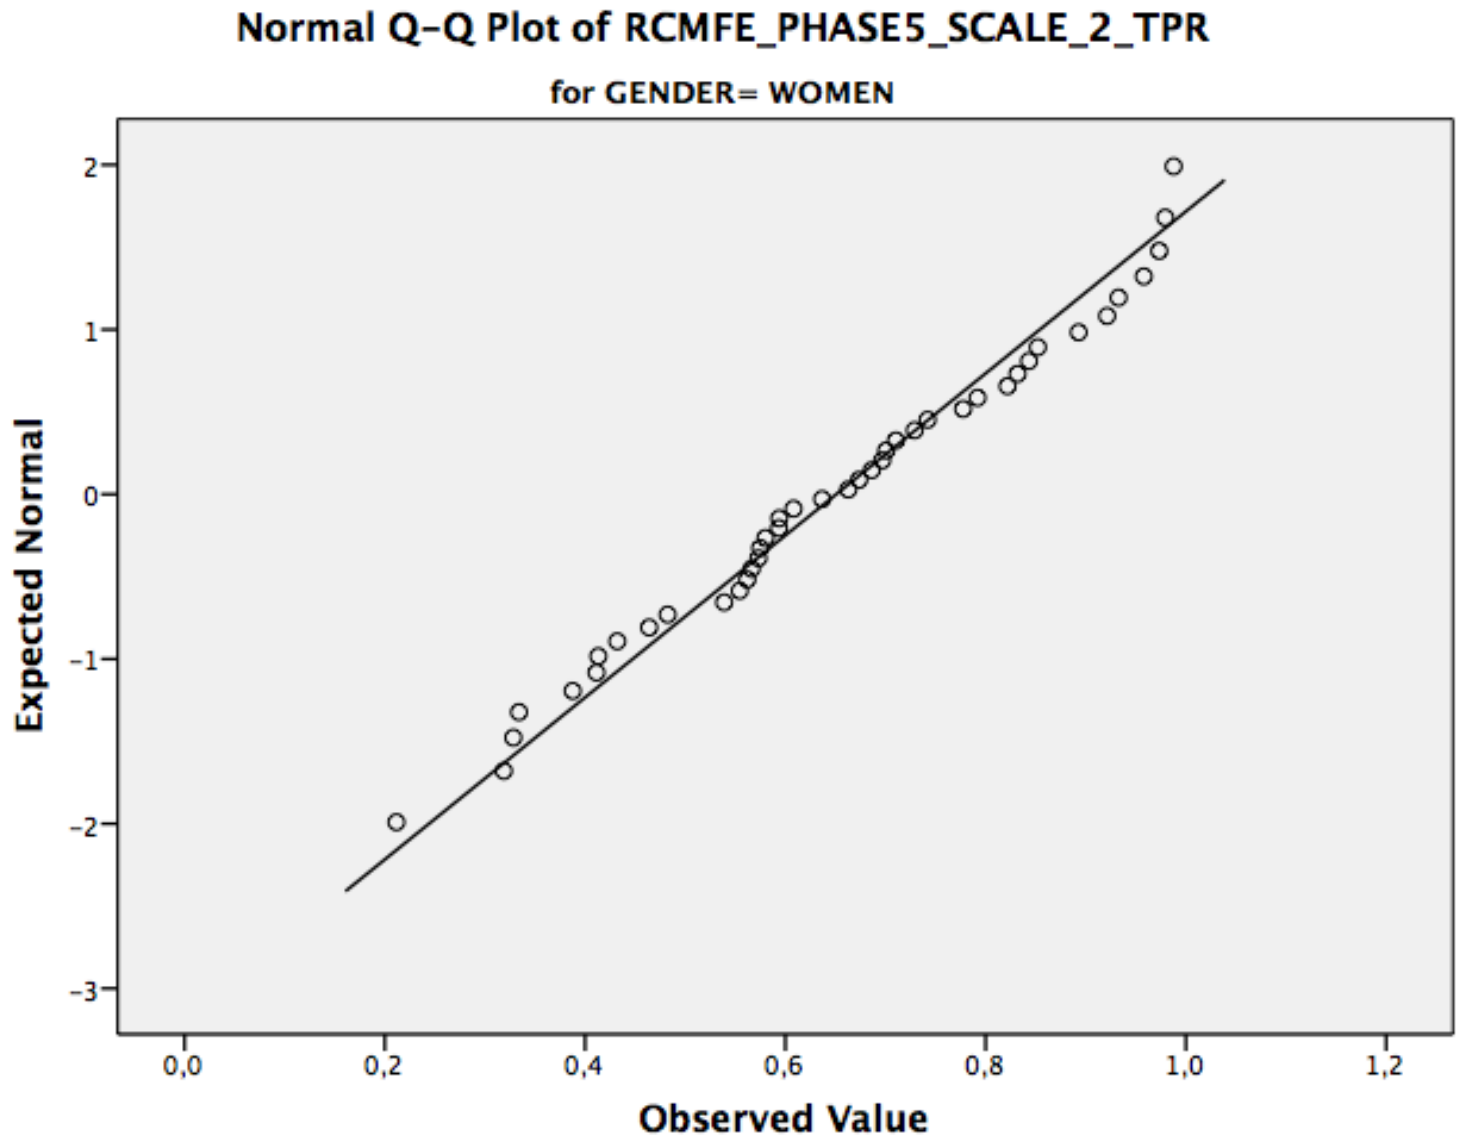

# Normal Q-Q Plot of RCMFE\_PHASE5\_SCALE\_2\_TPR

for GENDER= MEN

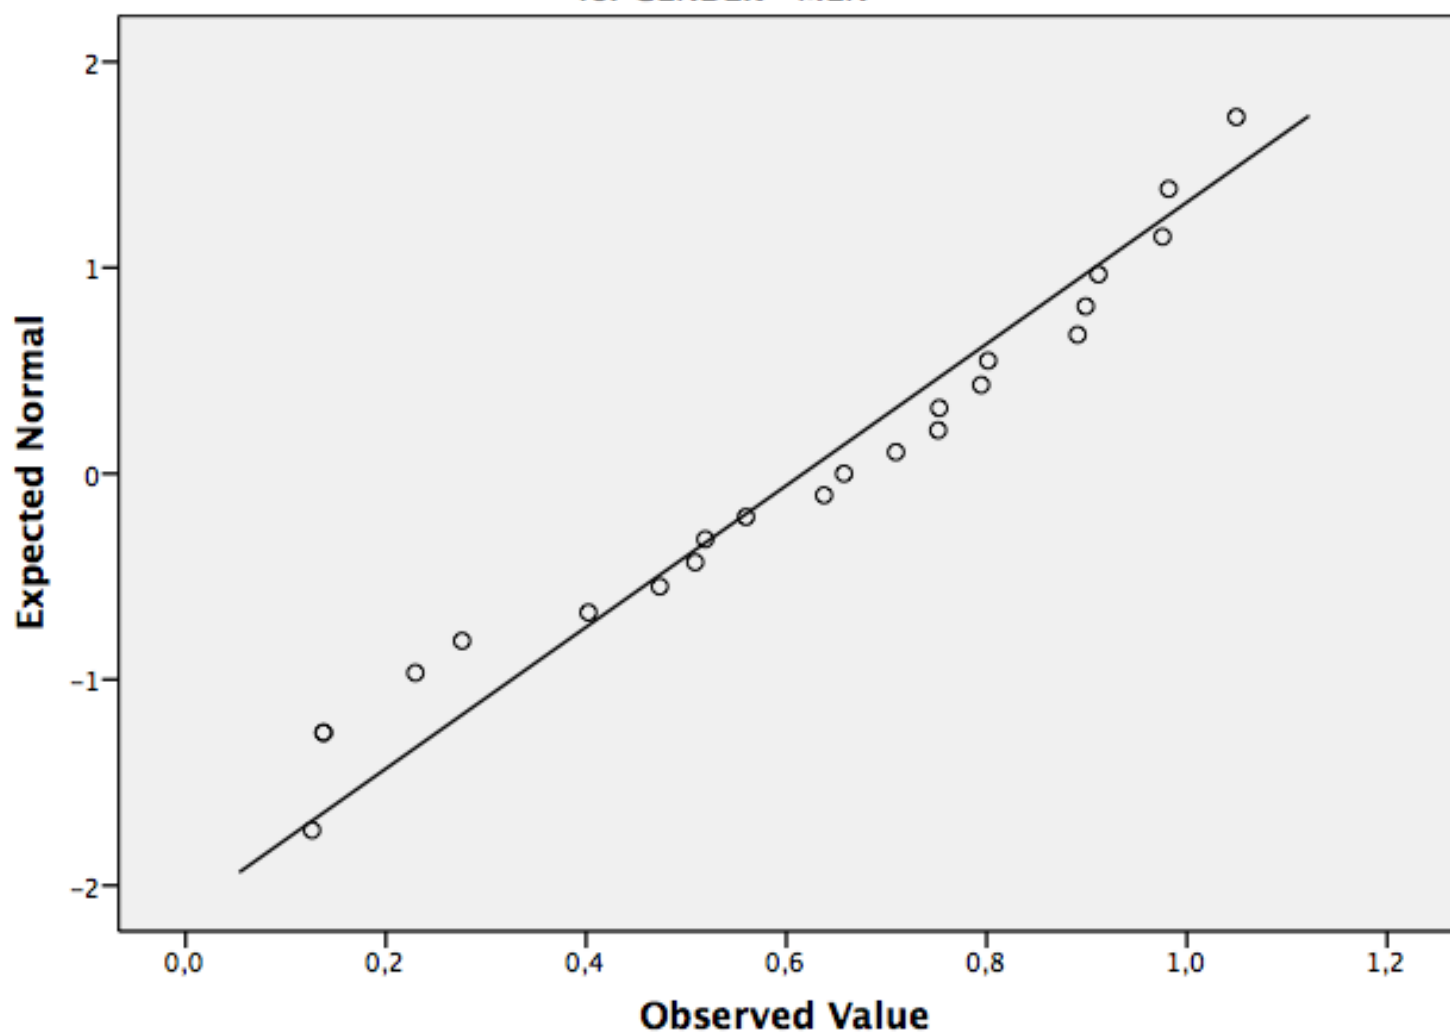

Normal Q-Q Plots

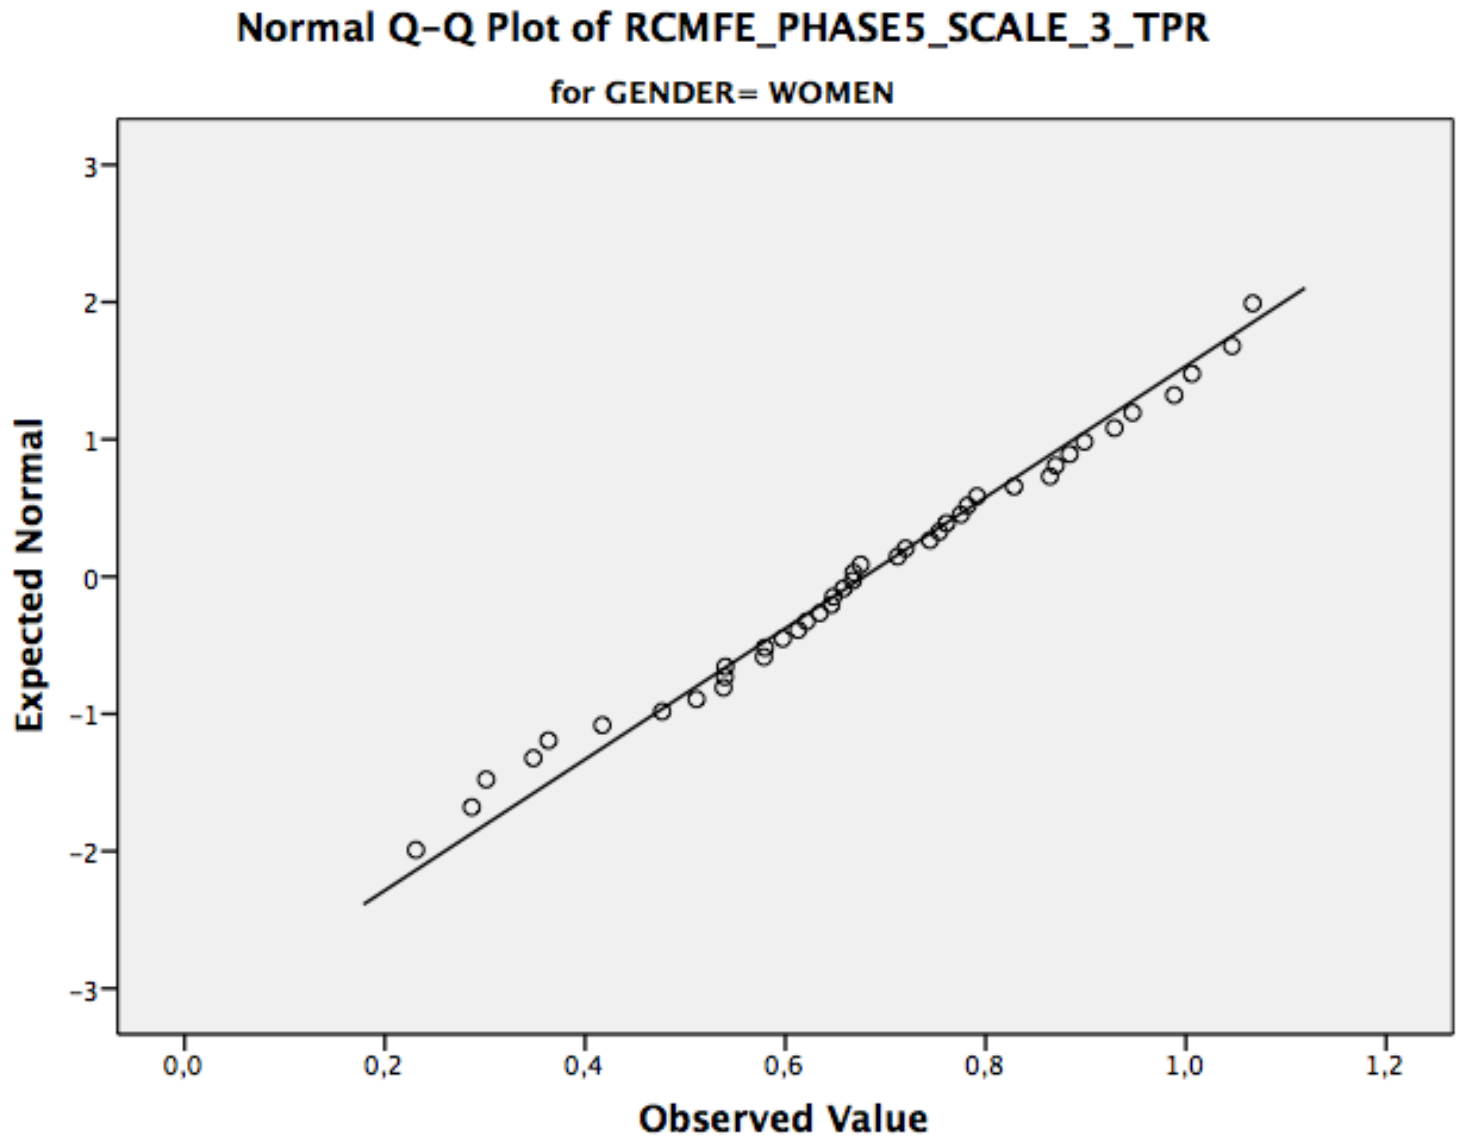



# Normal Q-Q Plot of RCMFE\_PHASE5\_SCALE\_3\_TPR

for GENDER= MEN

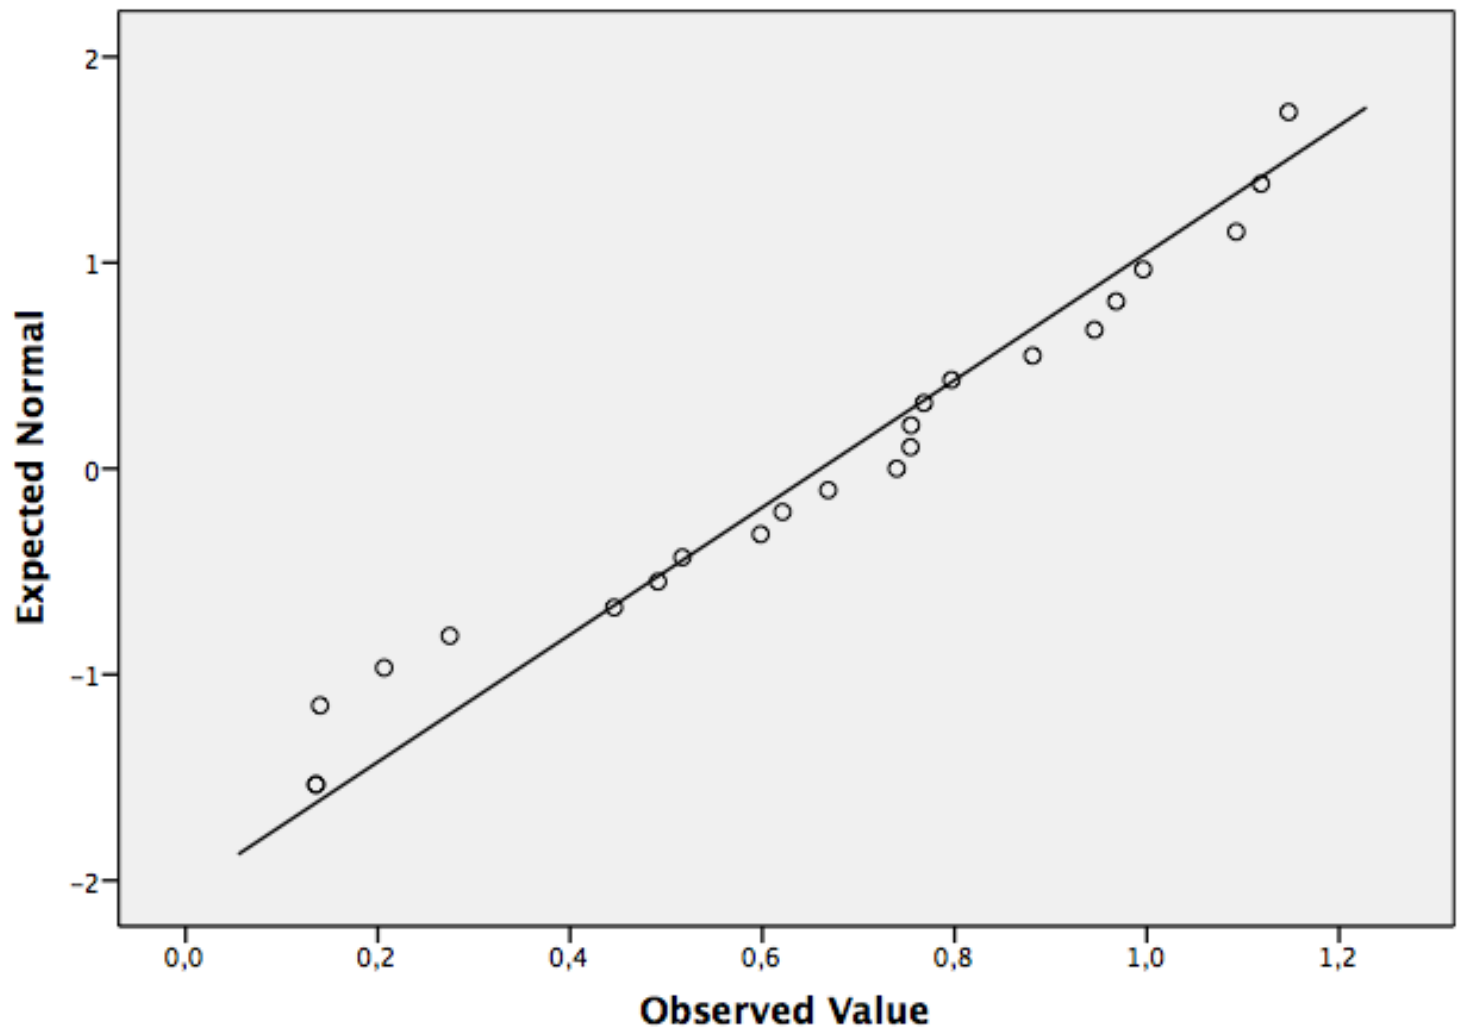

Normal Q-Q Plots

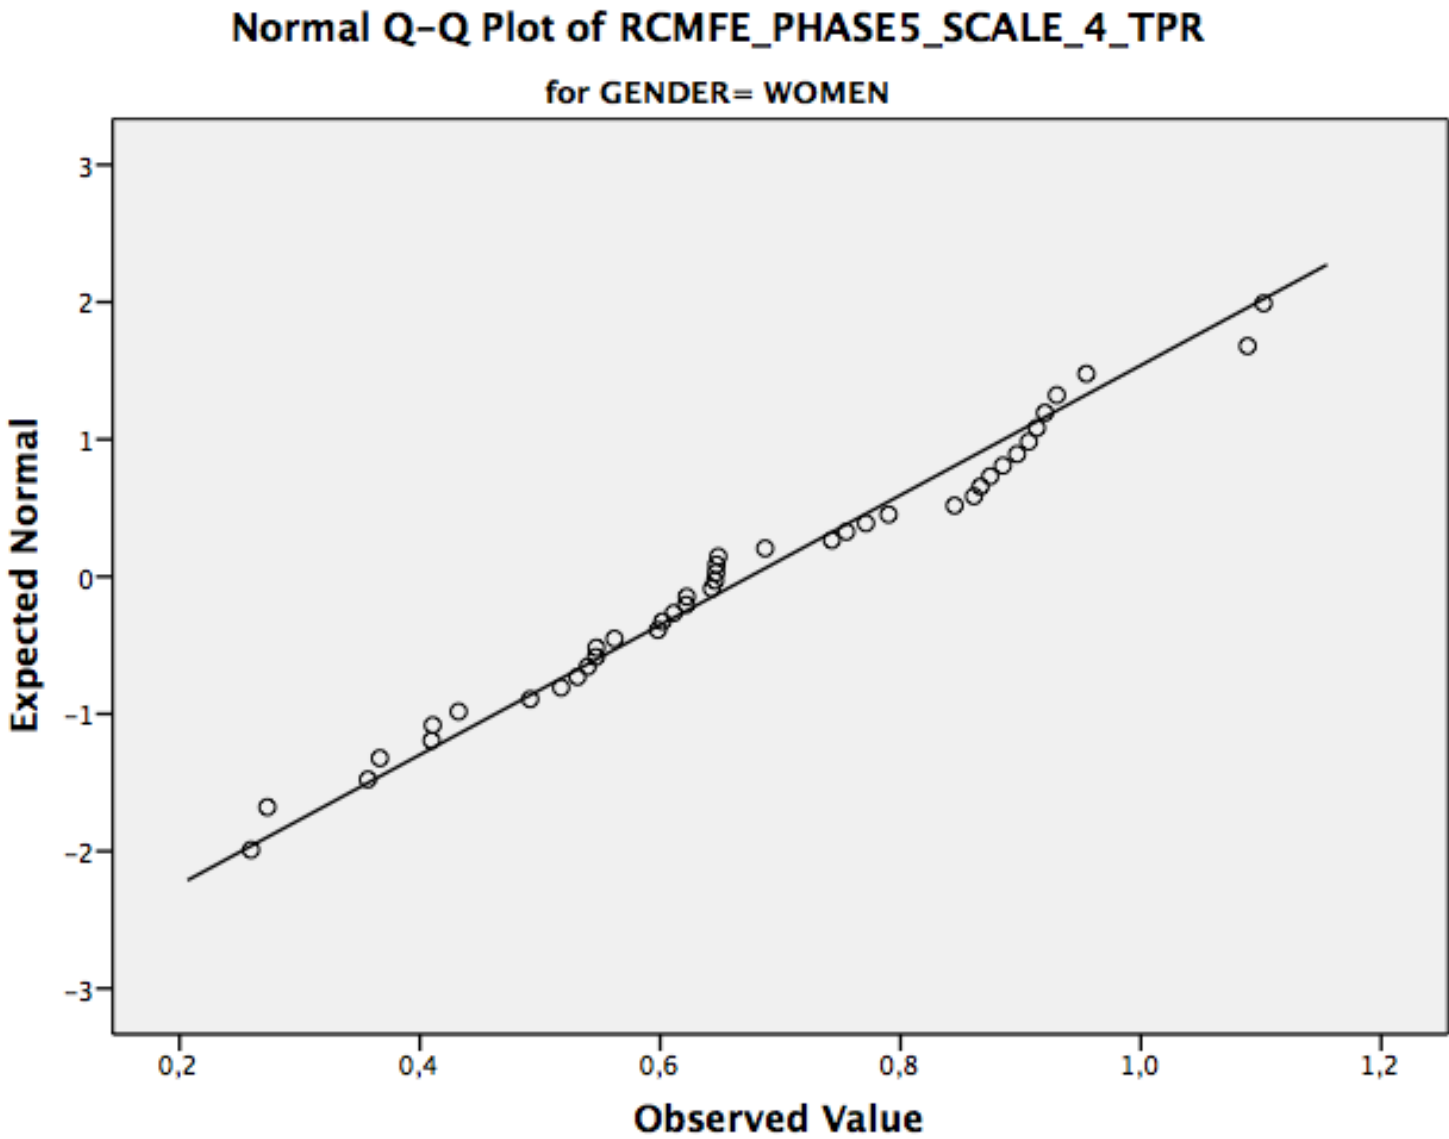

# Normal Q-Q Plot of RCMFE\_PHASE5\_SCALE\_4\_TPR

for GENDER= MEN

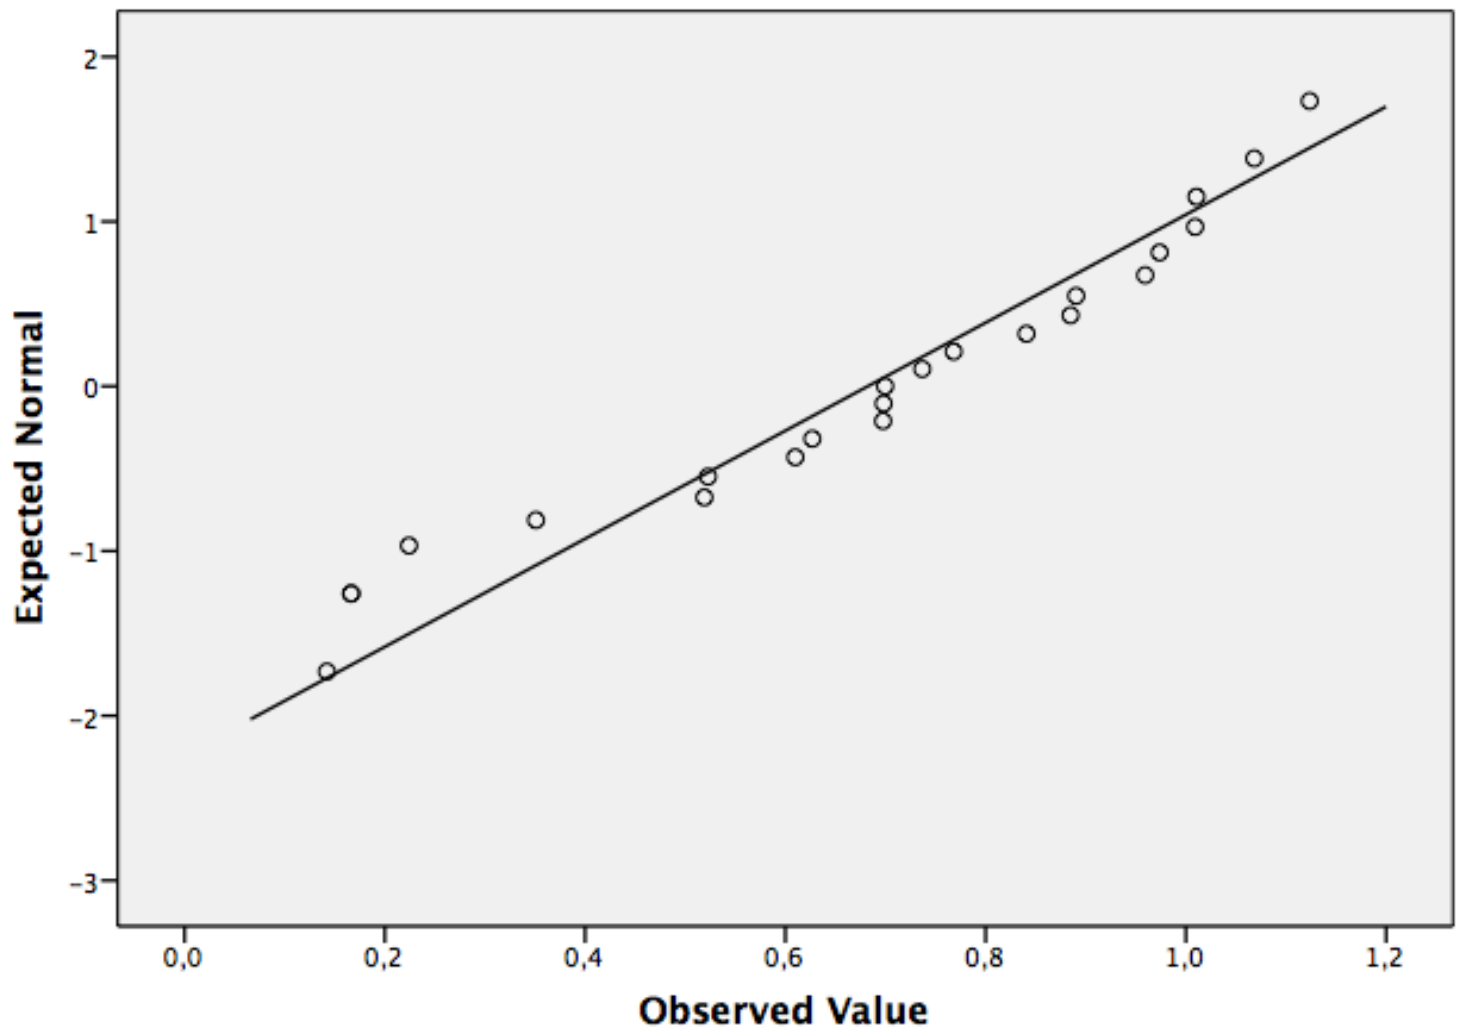

Normal Q-Q Plots

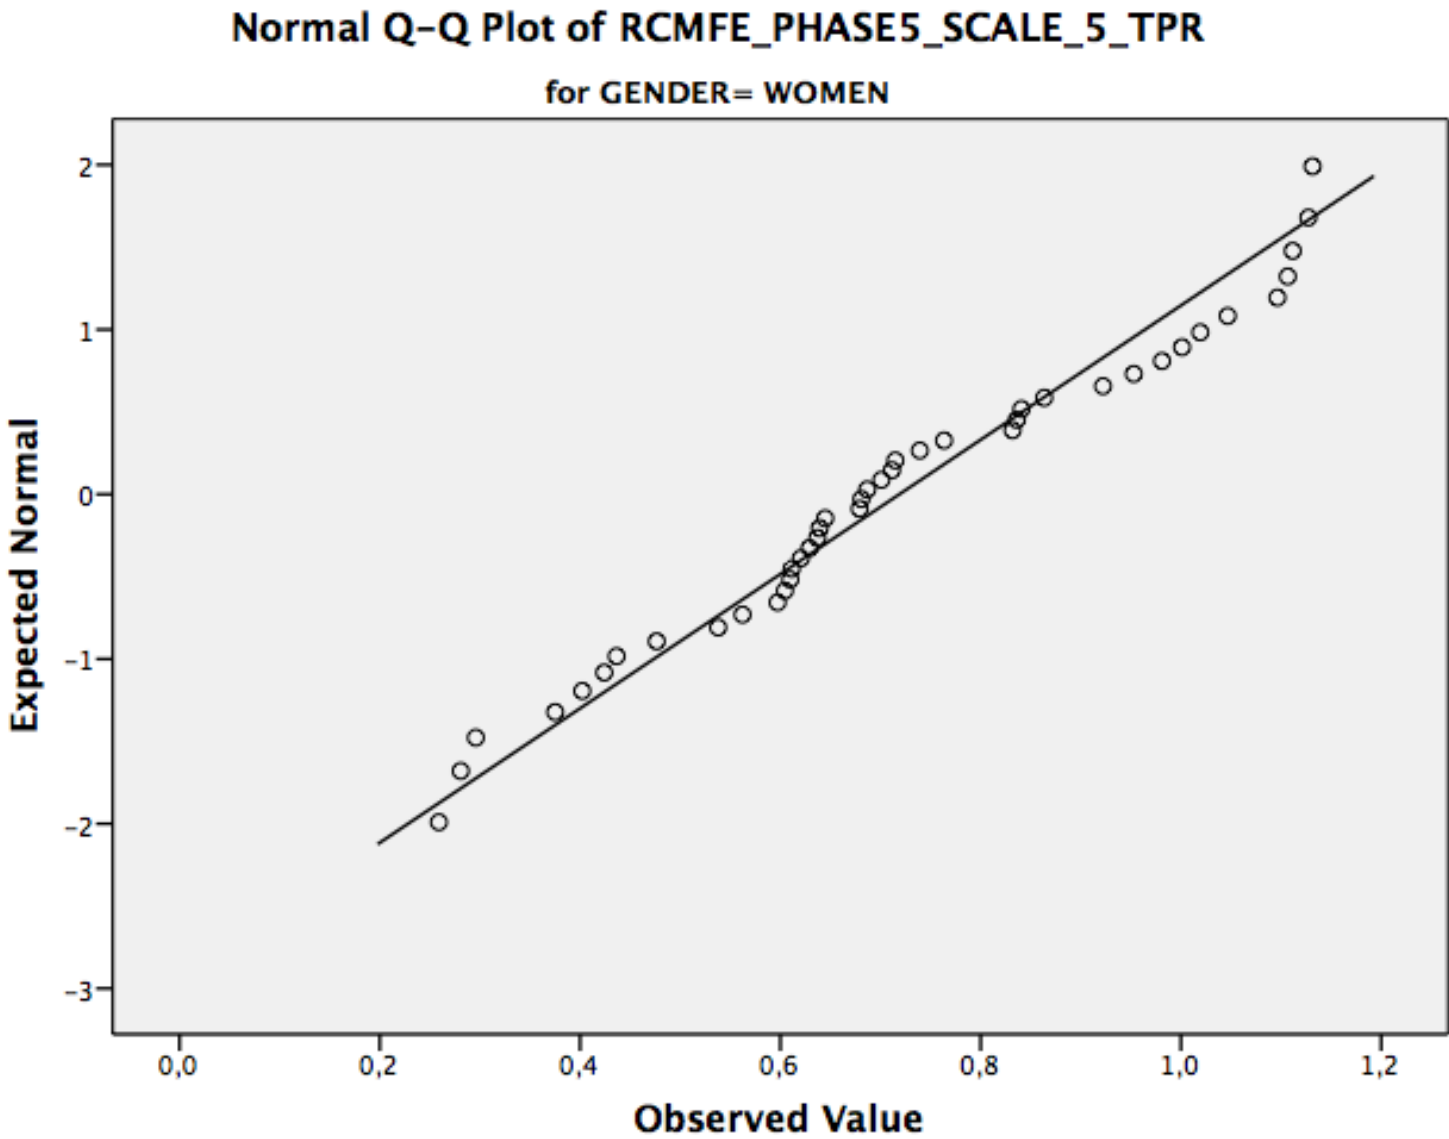

# Normal Q-Q Plot of RCMFE\_PHASE5\_SCALE\_5\_TPR

for GENDER= MEN

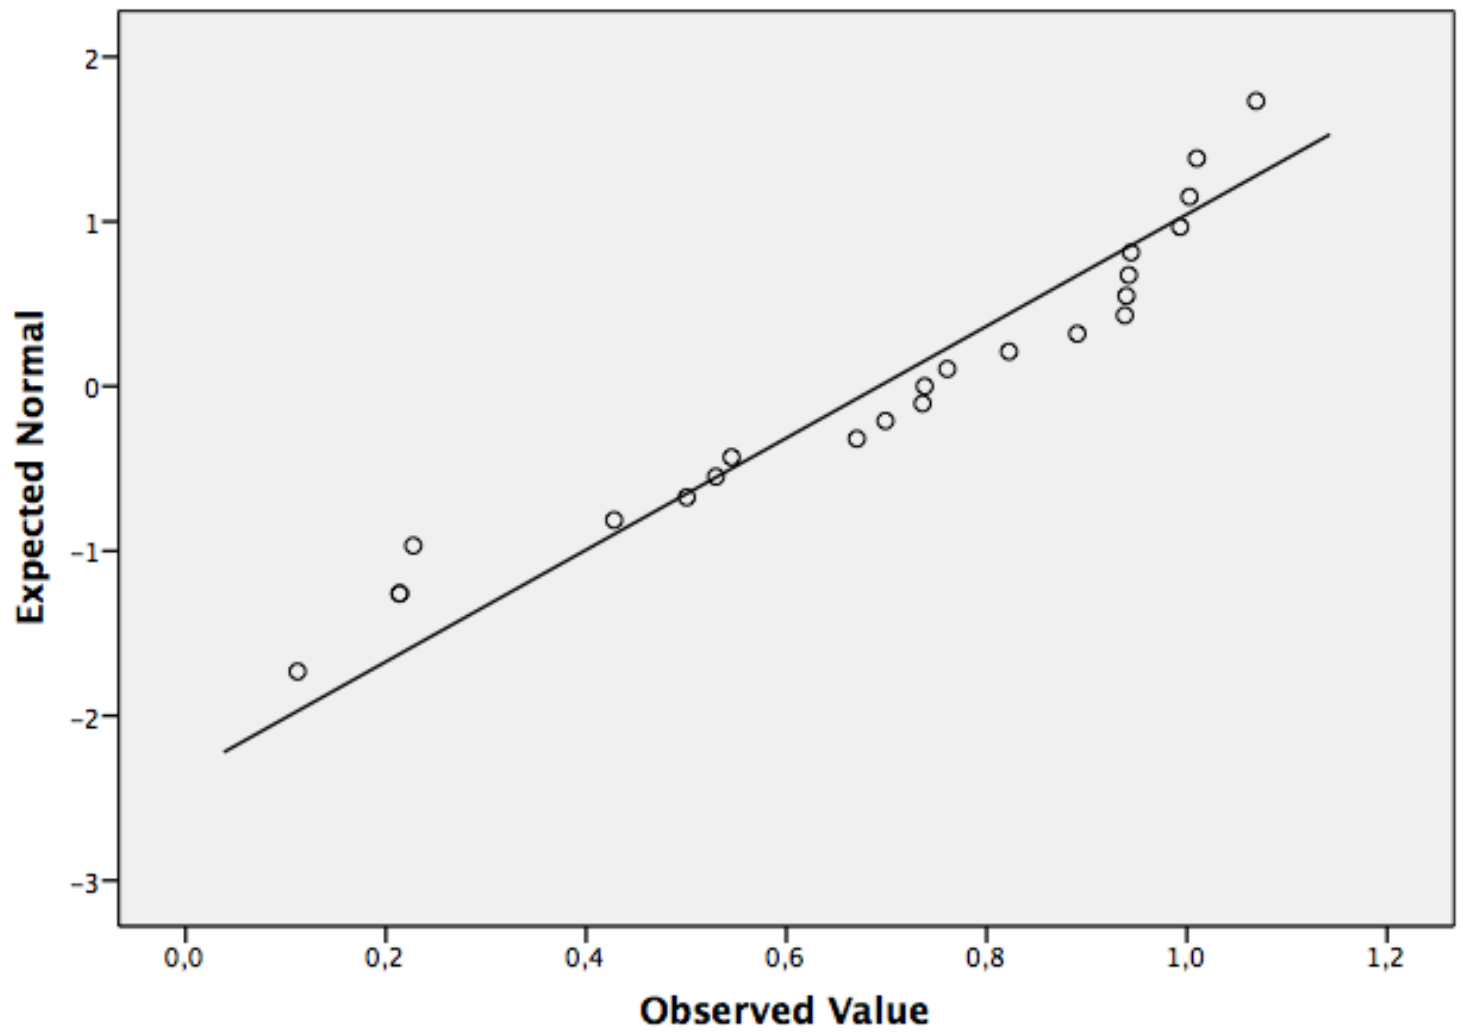

PATHOLOGY

Case Processing Summary

| PATHOLOGY            |       | Cases |         |         |         |       |         |
|----------------------|-------|-------|---------|---------|---------|-------|---------|
|                      |       | Valid |         | Missing |         | Total |         |
|                      |       | N     | Percent | N       | Percent | N     | Percent |
| RCMFE_PHASE1_SCALE_1 | NO-OI | 29    | 100,0%  | 0       | 0,0%    | 29    | 100,0%  |
| _TPR                 | OI    | 36    | 100,0%  | 0       | 0,0%    | 36    | 100,0%  |
| RCMFE_PHASE1_SCALE_2 | NO-OI | 29    | 100,0%  | 0       | 0,0%    | 29    | 100,0%  |
| _TPR                 | OI    | 36    | 100,0%  | 0       | 0,0%    | 36    | 100,0%  |
| RCMFE_PHASE1_SCALE_3 | NO-OI | 29    | 100,0%  | 0       | 0,0%    | 29    | 100,0%  |
| _TPR                 | OI    | 36    | 100,0%  | 0       | 0,0%    | 36    | 100,0%  |
| RCMFE_PHASE1_SCALE_4 | NO-OI | 29    | 100,0%  | 0       | 0,0%    | 29    | 100,0%  |
| _TPR                 | OI    | 36    | 100,0%  | 0       | 0,0%    | 36    | 100,0%  |
| RCMFE_PHASE1_SCALE_5 | NO-OI | 29    | 100,0%  | 0       | 0,0%    | 29    | 100,0%  |
| _TPR                 | OI    | 36    | 100,0%  | 0       | 0,0%    | 36    | 100,0%  |
| RCMFE_PHASE2_SCALE_1 | NO-OI | 29    | 100,0%  | 0       | 0,0%    | 29    | 100,0%  |
| _TPR                 | OI    | 36    | 100,0%  | 0       | 0,0%    | 36    | 100,0%  |
| RCMFE_PHASE2_SCALE_2 | NO-OI | 29    | 100,0%  | 0       | 0,0%    | 29    | 100,0%  |
| _TPR                 | OI    | 36    | 100,0%  | 0       | 0,0%    | 36    | 100,0%  |
| RCMFE_PHASE2_SCALE_3 | NO-OI | 29    | 100,0%  | 0       | 0,0%    | 29    | 100,0%  |
| _TPR                 | OI    | 36    | 100,0%  | 0       | 0,0%    | 36    | 100,0%  |
| RCMFE_PHASE2_SCALE_4 | NO-OI | 29    | 100,0%  | 0       | 0,0%    | 29    | 100,0%  |
| _TPR                 | OI    | 36    | 100,0%  | 0       | 0,0%    | 36    | 100,0%  |
| RCMFE_PHASE2_SCALE_5 | NO-OI | 29    | 100,0%  | 0       | 0,0%    | 29    | 100,0%  |
| _TPR                 | OI    | 36    | 100,0%  | 0       | 0,0%    | 36    | 100,0%  |
| RCMFE_PHASE3_SCALE_1 | NO-OI | 29    | 100,0%  | 0       | 0,0%    | 29    | 100,0%  |
| _TPR                 | OI    | 36    | 100,0%  | 0       | 0,0%    | 36    | 100,0%  |
| RCMFE_PHASE3_SCALE_2 | NO-OI | 29    | 100,0%  | 0       | 0,0%    | 29    | 100,0%  |
| _TPR                 | OI    | 36    | 100,0%  | 0       | 0,0%    | 36    | 100,0%  |
| RCMFE_PHASE3_SCALE_3 | NO-OI | 29    | 100,0%  | 0       | 0,0%    | 29    | 100,0%  |
| _TPR                 | OI    | 36    | 100,0%  | 0       | 0,0%    | 36    | 100,0%  |
| RCMFE_PHASE3_SCALE_4 | NO-OI | 29    | 100,0%  | 0       | 0,0%    | 29    | 100,0%  |
| _TPR                 | OI    | 36    | 100,0%  | 0       | 0,0%    | 36    | 100,0%  |
| RCMFE_PHASE3_SCALE_5 | NO-OI | 29    | 100,0%  | 0       | 0,0%    | 29    | 100,0%  |
| _TPR                 | OI    | 36    | 100,0%  | 0       | 0,0%    | 36    | 100,0%  |
| RCMFE_PHASE4_SCALE_1 | NO-OI | 29    | 100,0%  | 0       | 0,0%    | 29    | 100,0%  |
| _TPR                 | OI    | 36    | 100,0%  | 0       | 0,0%    | 36    | 100,0%  |
| RCMFE_PHASE4_SCALE_2 | NO-OI | 29    | 100,0%  | 0       | 0,0%    | 29    | 100,0%  |
| _TPR                 | OI    | 36    | 100,0%  | 0       | 0,0%    | 36    | 100,0%  |
| RCMFE_PHASE4_SCALE_3 | NO-OI | 29    | 100,0%  | 0       | 0,0%    | 29    | 100,0%  |
| _TPR                 | OI    | 36    | 100,0%  | 0       | 0,0%    | 36    | 100,0%  |
| RCMFE_PHASE4_SCALE_4 | NO-OI | 29    | 100,0%  | 0       | 0,0%    | 29    | 100,0%  |
| _TPR                 | OI    | 36    | 100,0%  | 0       | 0,0%    | 36    | 100,0%  |
| RCMFE_PHASE4_SCALE_5 | NO-OI | 29    | 100,0%  | 0       | 0,0%    | 29    | 100,0%  |
| _TPR                 | OI    | 36    | 100,0%  | 0       | 0,0%    | 36    | 100,0%  |
| RCMFE_PHASE5_SCALE_1 | NO-OI | 29    | 100,0%  | 0       | 0,0%    | 29    | 100,0%  |
| _TPR                 |       |       |         |         |         |       |         |

### Case Processing Summary

| PATHOLOGY            |       | Cases |         |         |         |       |         |
|----------------------|-------|-------|---------|---------|---------|-------|---------|
|                      |       | Valid |         | Missing |         | Total |         |
|                      |       | N     | Percent | N       | Percent | N     | Percent |
| RCMFE_PHASE5_SCALE_1 | OI    | 36    | 100,0%  | 0       | 0,0%    | 36    | 100,0%  |
| _TPR                 |       |       |         |         |         |       |         |
| RCMFE_PHASE5_SCALE_2 | NO-OI | 29    | 100,0%  | 0       | 0,0%    | 29    | 100,0%  |
| _TPR                 | OI    | 36    | 100,0%  | 0       | 0,0%    | 36    | 100,0%  |
| RCMFE_PHASE5_SCALE_3 | NO-OI | 29    | 100,0%  | 0       | 0,0%    | 29    | 100,0%  |
| _TPR                 | OI    | 36    | 100,0%  | 0       | 0,0%    | 36    | 100,0%  |
| RCMFE_PHASE5_SCALE_4 | NO-OI | 29    | 100,0%  | 0       | 0,0%    | 29    | 100,0%  |
| _TPR                 | OI    | 36    | 100,0%  | 0       | 0,0%    | 36    | 100,0%  |
| RCMFE_PHASE5_SCALE_5 | NO-OI | 29    | 100,0%  | 0       | 0,0%    | 29    | 100,0%  |
| _TPR                 | OI    | 36    | 100,0%  | 0       | 0,0%    | 36    | 100,0%  |

### Tests of Normality

| PATHOLOGY            |       | Kolmogorov-Smirnov <sup>a</sup> |    |       | Shapiro-Wilk |    |      |
|----------------------|-------|---------------------------------|----|-------|--------------|----|------|
|                      |       | Statistic                       | df | Sig.  | Statistic    | df | Sig. |
| RCMFE_PHASE1_SCALE_1 | NO-OI | ,127                            | 29 | ,200* | ,975         | 29 | ,713 |
| _TPR                 | OI    | ,138                            | 36 | ,079  | ,912         | 36 | ,007 |
| RCMFE_PHASE1_SCALE_2 | NO-OI | ,090                            | 29 | ,200* | ,967         | 29 | ,474 |
| _TPR                 | OI    | ,126                            | 36 | ,159  | ,956         | 36 | ,163 |
| RCMFE_PHASE1_SCALE_3 | NO-OI | ,097                            | 29 | ,200* | ,959         | 29 | ,309 |
| _TPR                 | OI    | ,110                            | 36 | ,200* | ,972         | 36 | ,491 |
| RCMFE_PHASE1_SCALE_4 | NO-OI | ,115                            | 29 | ,200* | ,956         | 29 | ,257 |
| _TPR                 | OI    | ,114                            | 36 | ,200* | ,971         | 36 | ,450 |
| RCMFE_PHASE1_SCALE_5 | NO-OI | ,070                            | 29 | ,200* | ,980         | 29 | ,836 |
| _TPR                 | OI    | ,092                            | 36 | ,200* | ,982         | 36 | ,807 |
| RCMFE_PHASE2_SCALE_1 | NO-OI | ,152                            | 29 | ,084  | ,945         | 29 | ,136 |
| _TPR                 | OI    | ,073                            | 36 | ,200* | ,971         | 36 | ,455 |
| RCMFE_PHASE2_SCALE_2 | NO-OI | ,105                            | 29 | ,200* | ,951         | 29 | ,196 |
| _TPR                 | OI    | ,079                            | 36 | ,200* | ,976         | 36 | ,615 |
| RCMFE_PHASE2_SCALE_3 | NO-OI | ,105                            | 29 | ,200* | ,964         | 29 | ,413 |
| _TPR                 | OI    | ,104                            | 36 | ,200* | ,955         | 36 | ,147 |
| RCMFE_PHASE2_SCALE_4 | NO-OI | ,118                            | 29 | ,200* | ,959         | 29 | ,303 |
| _TPR                 | OI    | ,114                            | 36 | ,200* | ,944         | 36 | ,069 |
| RCMFE_PHASE2_SCALE_5 | NO-OI | ,118                            | 29 | ,200* | ,956         | 29 | ,266 |
| _TPR                 | OI    | ,088                            | 36 | ,200* | ,928         | 36 | ,021 |
| RCMFE_PHASE3_SCALE_1 | NO-OI | ,098                            | 29 | ,200* | ,976         | 29 | ,715 |
| _TPR                 | OI    | ,114                            | 36 | ,200* | ,967         | 36 | ,343 |
| RCMFE_PHASE3_SCALE_2 | NO-OI | ,090                            | 29 | ,200* | ,984         | 29 | ,928 |
| _TPR                 | OI    | ,084                            | 36 | ,200* | ,981         | 36 | ,782 |
| RCMFE_PHASE3_SCALE_3 | NO-OI | ,068                            | 29 | ,200* | ,988         | 29 | ,981 |
| _TPR                 | OI    | ,160                            | 36 | ,020  | ,928         | 36 | ,022 |
| RCMFE_PHASE3_SCALE_4 | NO-OI | ,072                            | 29 | ,200* | ,986         | 29 | ,961 |
| _TPR                 | OI    | ,153                            | 36 | ,033  | ,953         | 36 | ,126 |
| RCMFE_PHASE3_SCALE_5 | NO-OI | ,116                            | 29 | ,200* | ,974         | 29 | ,660 |

|                      |       |      |    |       |      |    |      |
|----------------------|-------|------|----|-------|------|----|------|
| _TPR                 | OI    | ,090 | 36 | ,200* | ,977 | 36 | ,654 |
| RCMFE_PHASE4_SCALE_1 | NO-OI | ,225 | 29 | ,001  | ,797 | 29 | ,050 |
| _TPR                 | OI    | ,196 | 36 | ,001  | ,814 | 36 | ,053 |
| RCMFE_PHASE4_SCALE_2 | NO-OI | ,170 | 29 | ,031  | ,835 | 29 | ,055 |
| _TPR                 | OI    | ,145 | 36 | ,055  | ,868 | 36 | ,001 |
| RCMFE_PHASE4_SCALE_3 | NO-OI | ,172 | 29 | ,027  | ,865 | 29 | ,072 |
|                      | OI    | ,180 | 36 | ,005  | ,846 | 36 | ,052 |
| RCMFE_PHASE4_SCALE_4 | NO-OI | ,147 | 29 | ,108  | ,947 | 29 | ,157 |
| _TPR                 | OI    | ,215 | 36 | ,000  | ,854 | 36 | ,055 |
| RCMFE_PHASE4_SCALE_5 | NO-OI | ,189 | 29 | ,010  | ,893 | 29 | ,067 |
| _TPR                 | OI    | ,170 | 36 | ,010  | ,831 | 36 | ,065 |
| RCMFE_PHASE5_SCALE_1 | NO-OI | ,108 | 29 | ,200* | ,971 | 29 | ,594 |
| _TPR                 | OI    | ,093 | 36 | ,200* | ,963 | 36 | ,273 |

#### Tests of Normality

| PATHOLOGY            |       | Kolmogorov-Smirnov <sup>a</sup> |    |       | Shapiro-Wilk |    |      |
|----------------------|-------|---------------------------------|----|-------|--------------|----|------|
|                      |       | Statistic                       | df | Sig.  | Statistic    | df | Sig. |
| RCMFE_PHASE5_SCALE_2 | NO-OI | ,112                            | 29 | ,200* | ,953         | 29 | ,224 |
| _TPR                 | OI    | ,087                            | 36 | ,200  | ,963         | 36 | ,262 |
| RCMFE_PHASE5_SCALE_3 | NO-OI | ,128                            | 29 | ,200* | ,942         | 29 | ,114 |
| _TPR                 | OI    | ,082                            | 36 | ,200  | ,979         | 36 | ,708 |
| RCMFE_PHASE5_SCALE_4 | NO-OI | ,125                            | 29 | ,200* | ,949         | 29 | ,170 |
| _TPR                 | OI    | ,125                            | 36 | ,166* | ,965         | 36 | ,297 |
| RCMFE_PHASE5_SCALE_5 | NO-OI | ,100                            | 29 | ,200* | ,953         | 29 | ,213 |
| _TPR                 | OI    | ,089                            | 36 | ,200* | ,975         | 36 | ,580 |

\*. This is a lower bound of the true significance.

a. Lilliefors Significance Correction



Normal Q-Q Plots

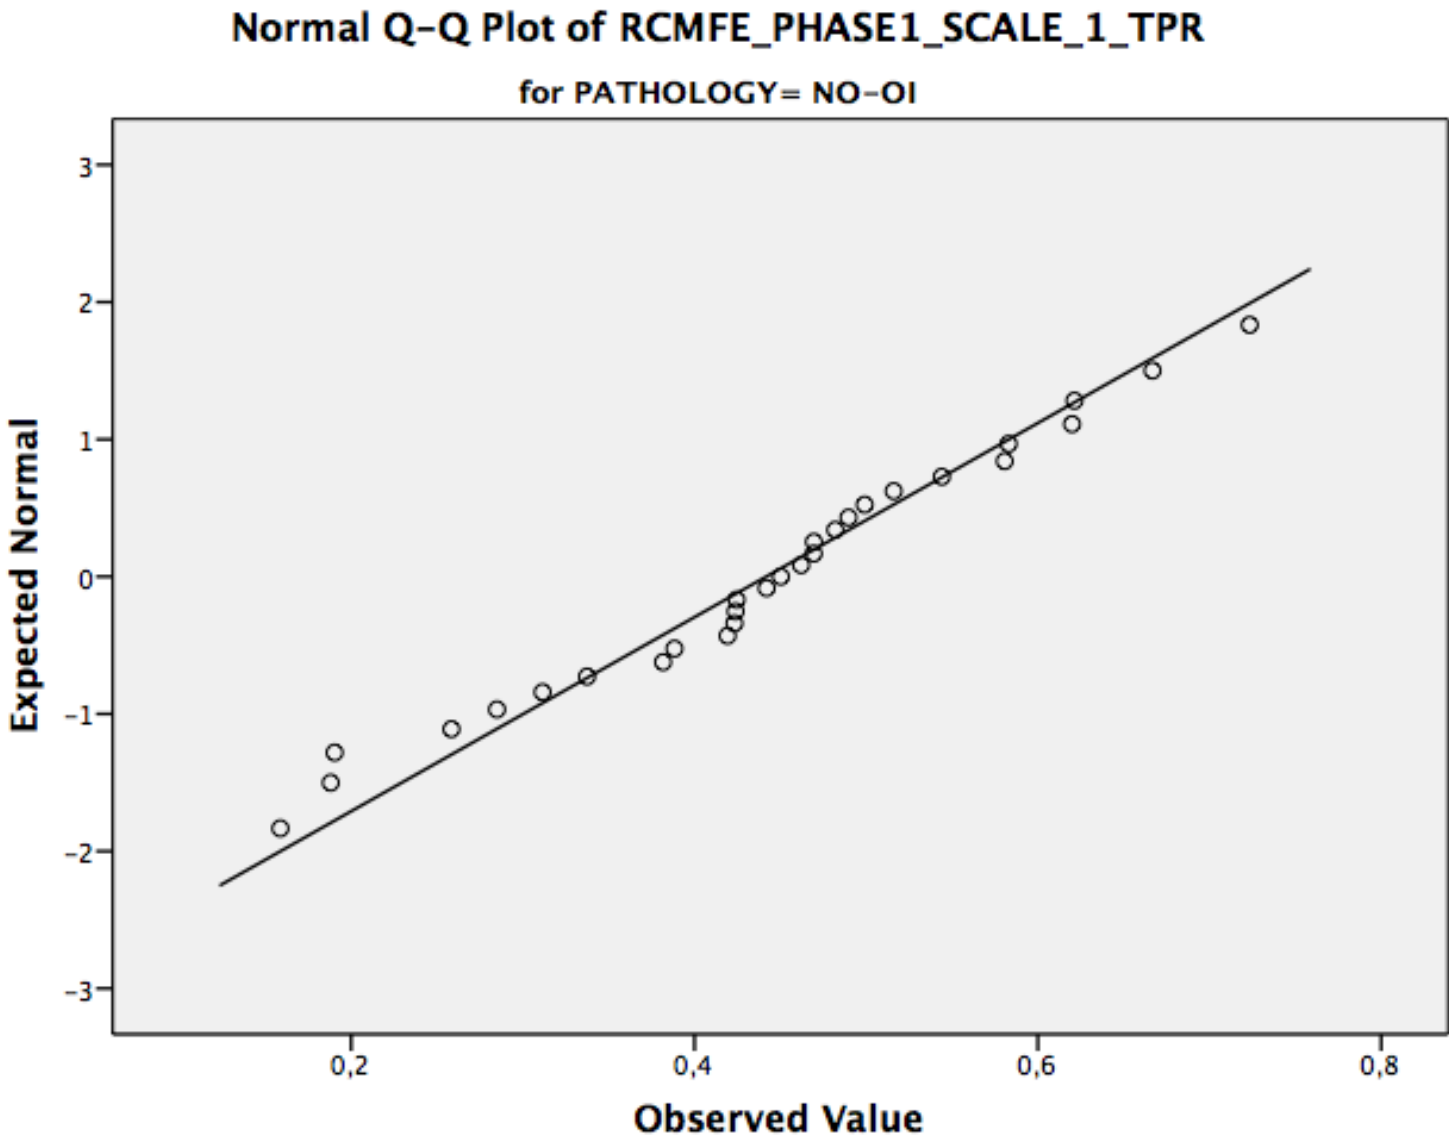

# Normal Q-Q Plot of RCMFE\_PHASE1\_SCALE\_1\_TPR

for PATHOLOGY= OI

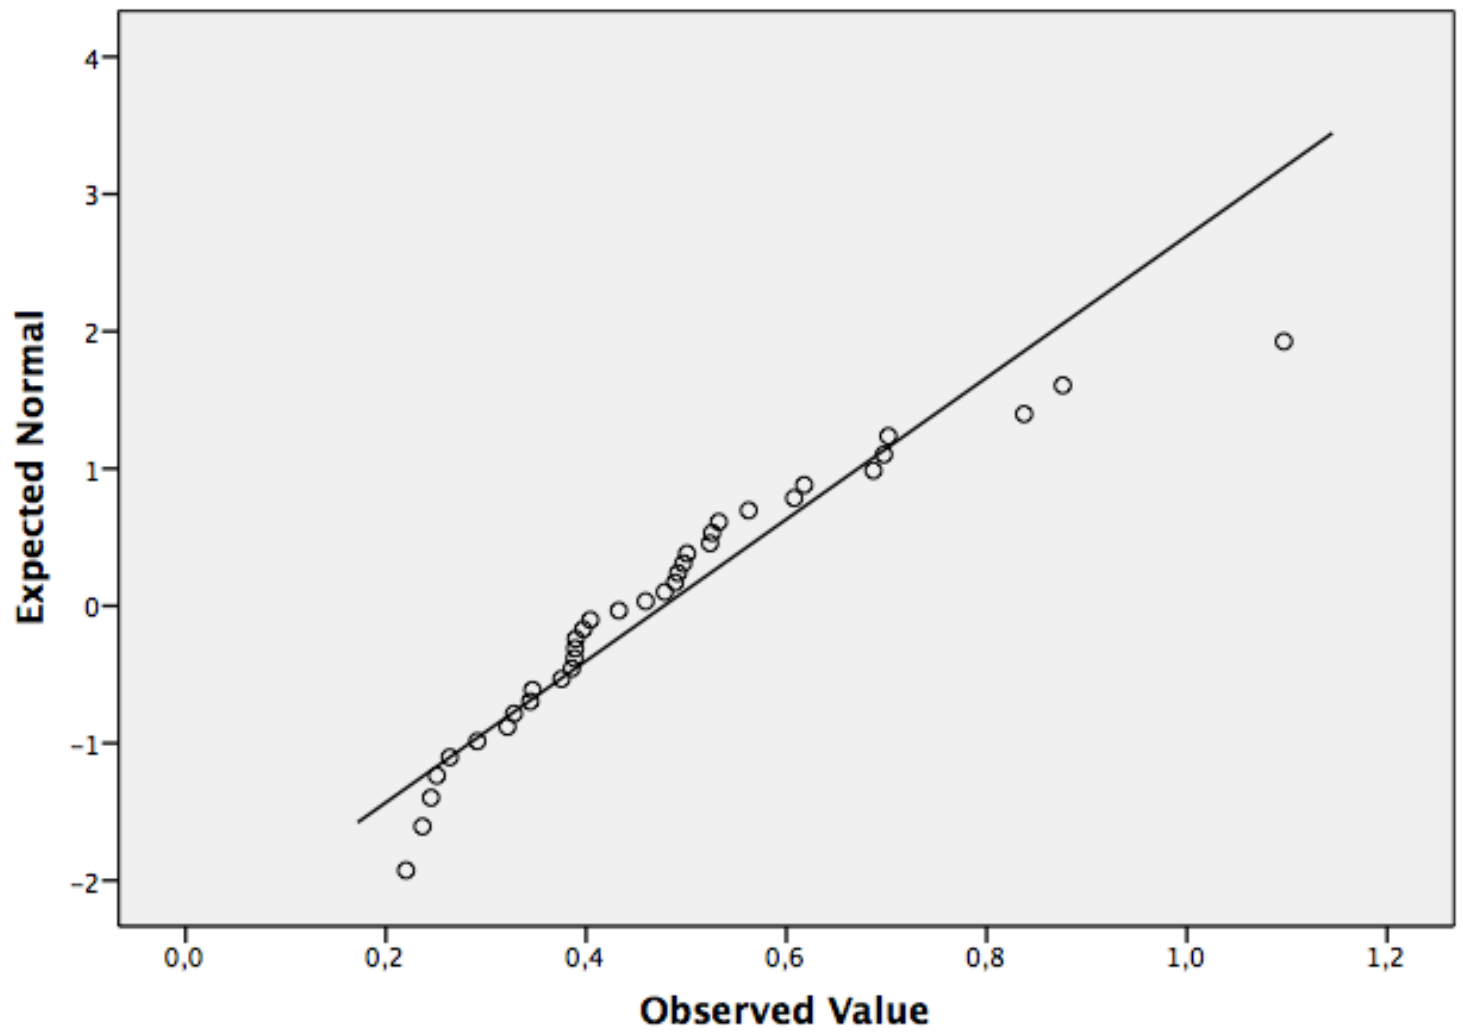

Normal Q-Q Plots

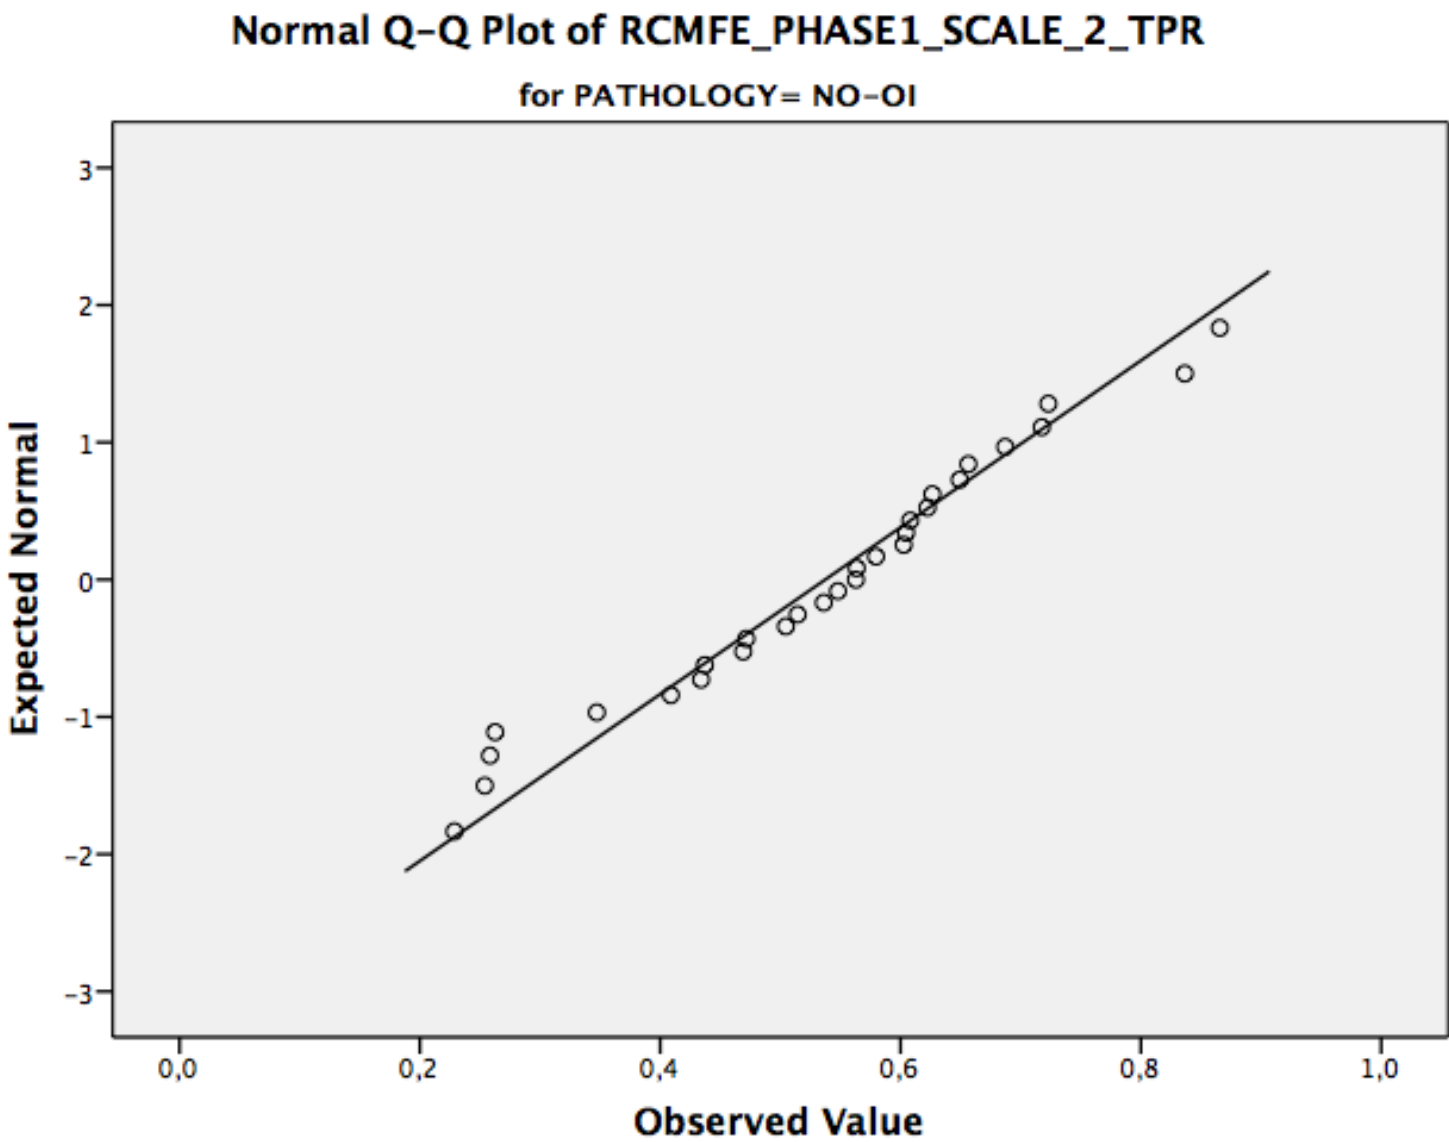

# Normal Q-Q Plot of RCMFE\_PHASE1\_SCALE\_2\_TPR

for PATHOLOGY= OI

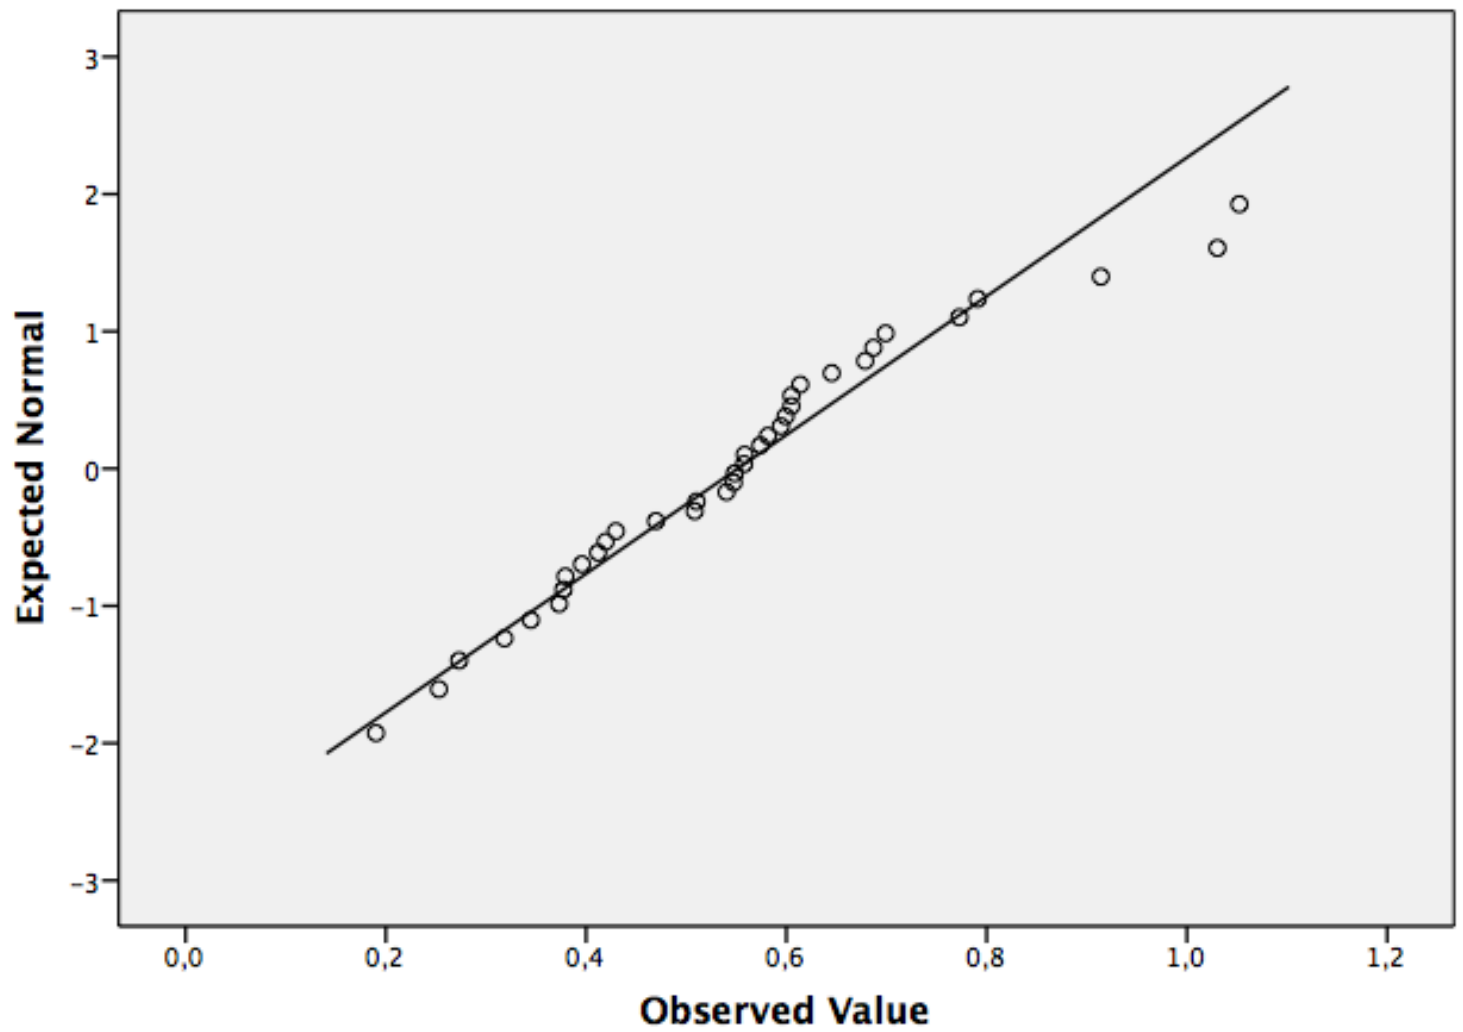

Normal Q-Q Plots

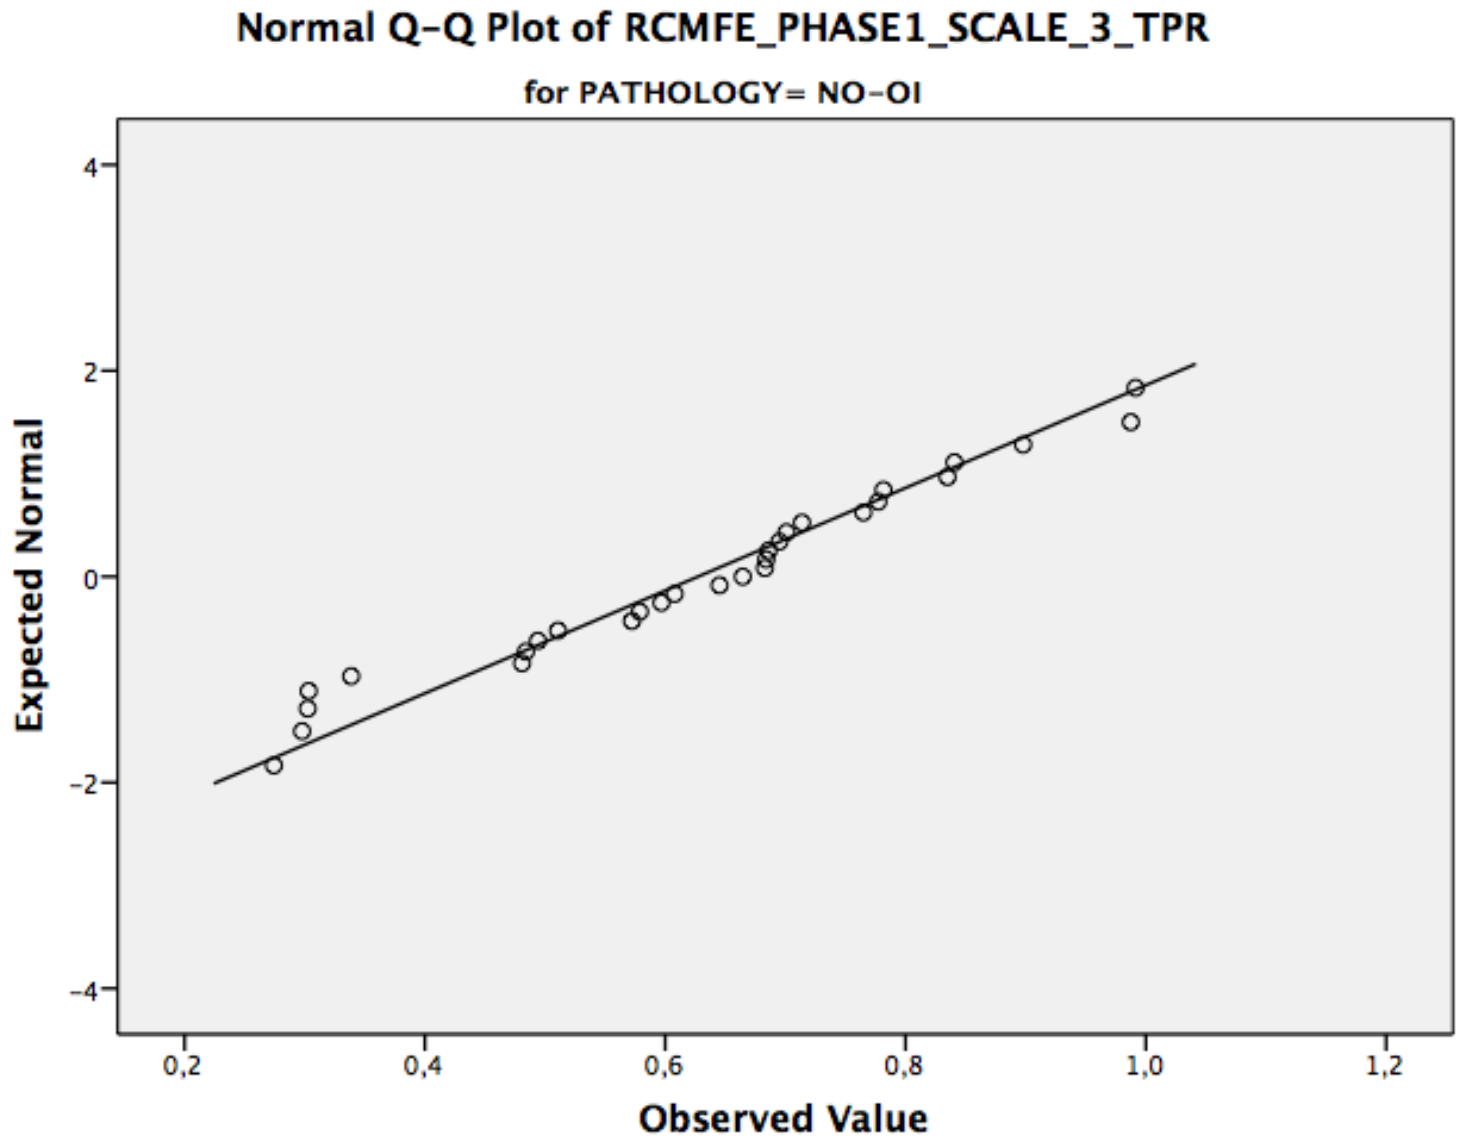

# Normal Q-Q Plot of RCMFE\_PHASE1\_SCALE\_3\_TPR

for PATHOLOGY= OI

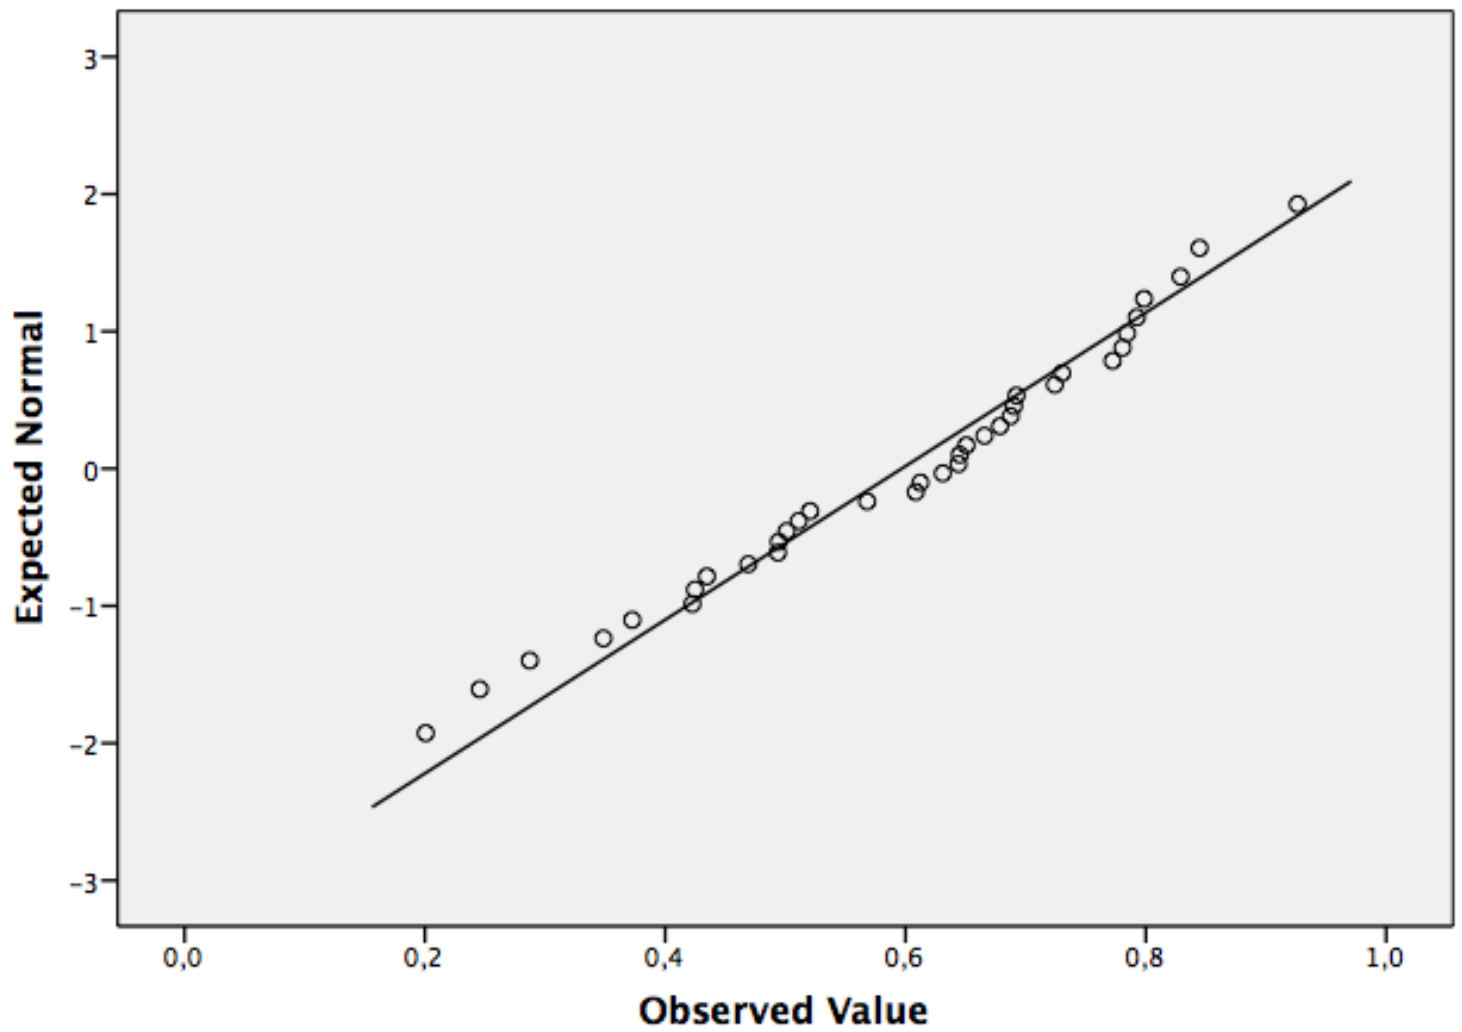

Normal Q-Q Plots

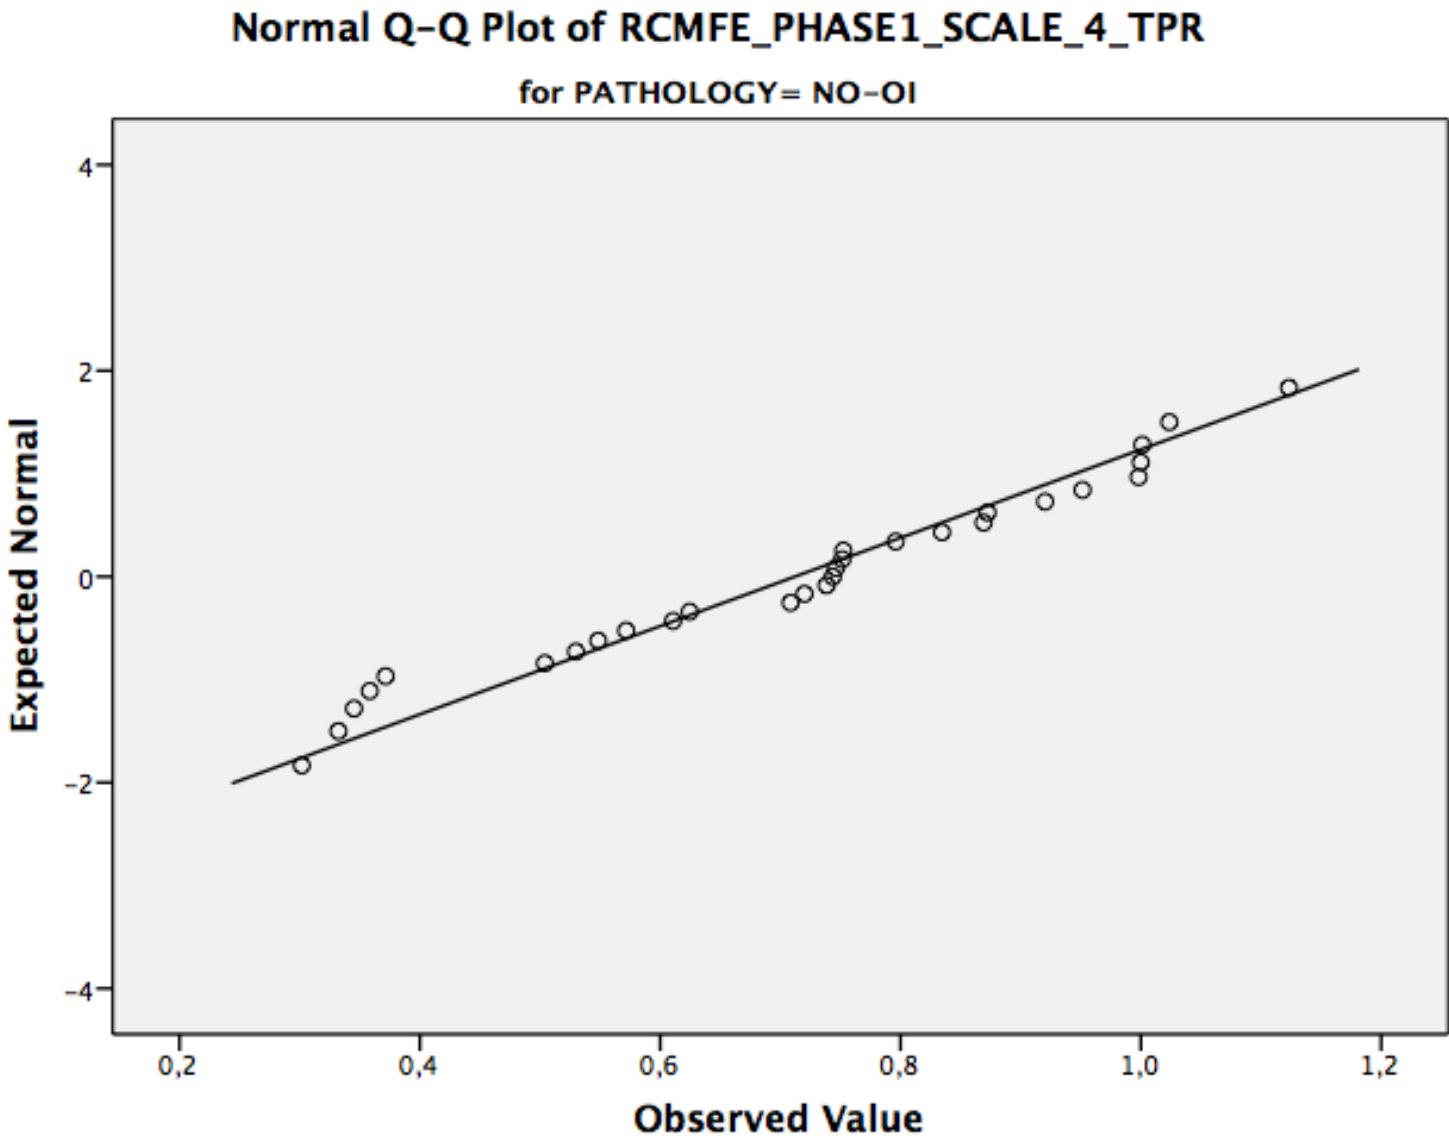

# Normal Q-Q Plot of RCMFE\_PHASE1\_SCALE\_4\_TPR

for PATHOLOGY= OI

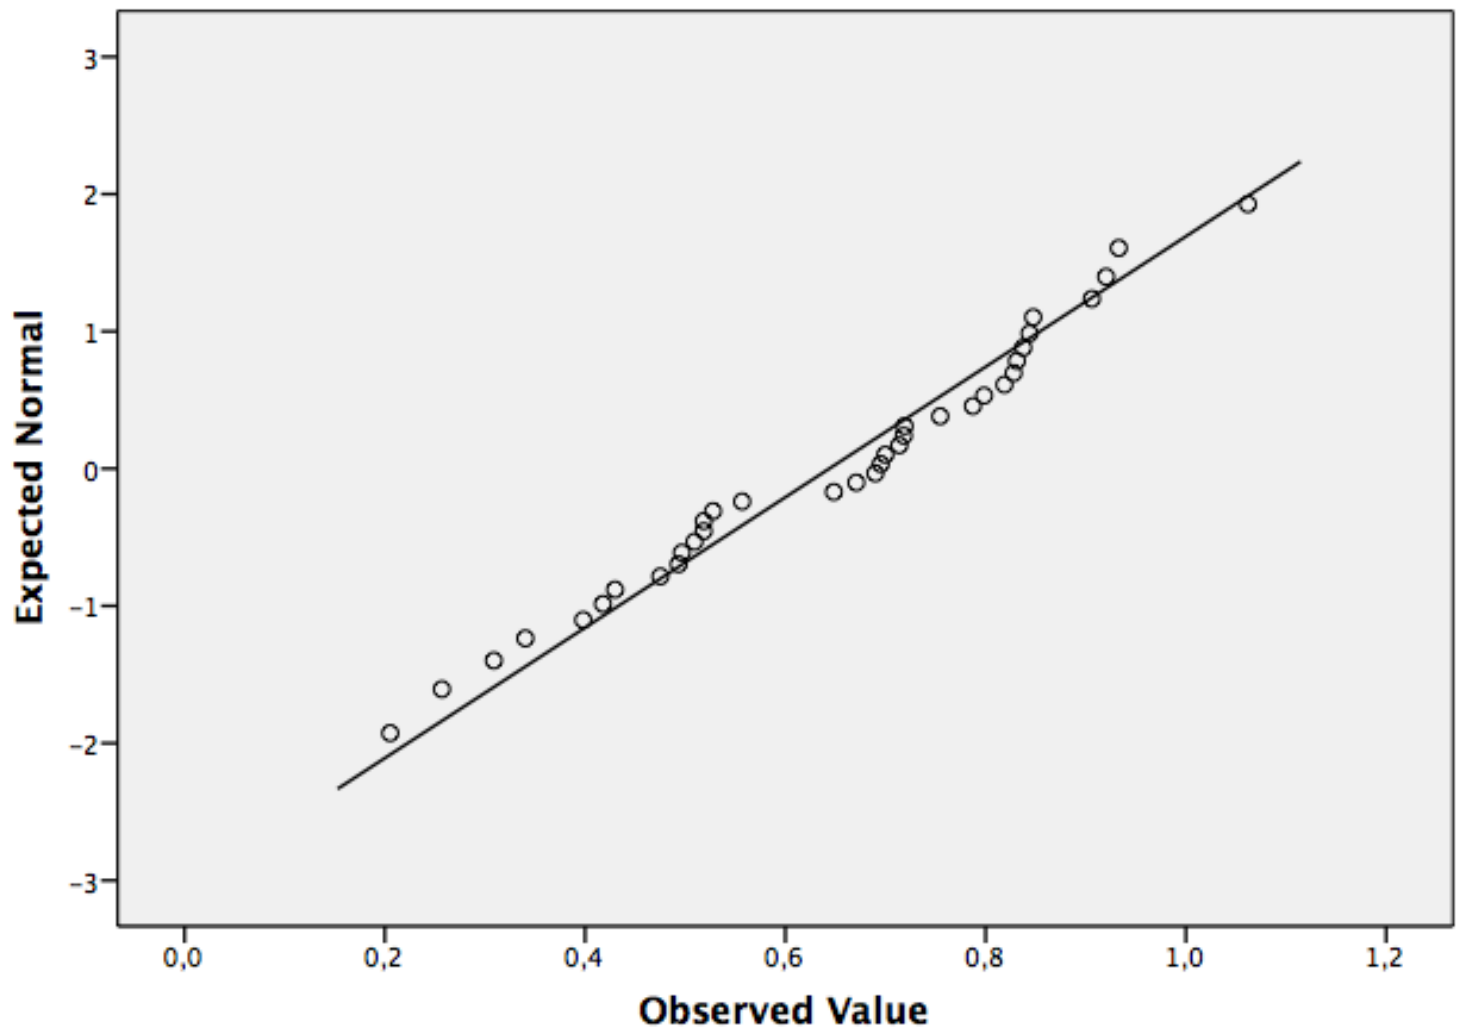



Normal Q-Q Plots

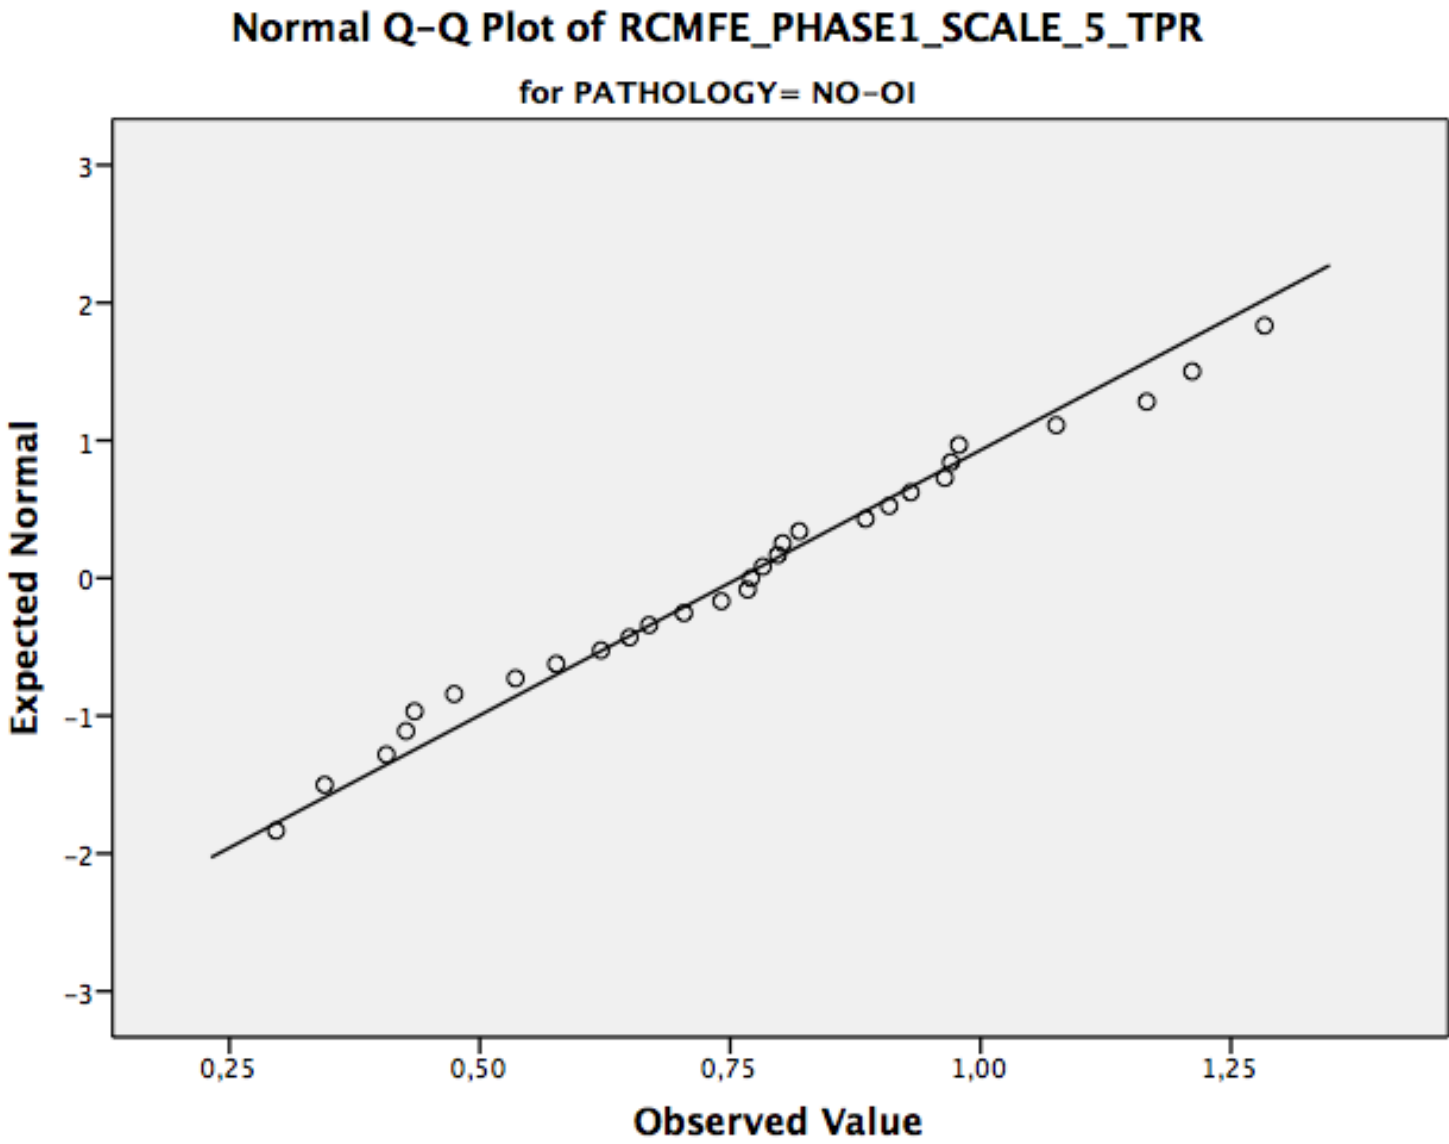

# Normal Q-Q Plot of RCMFE\_PHASE1\_SCALE\_5\_TPR

for PATHOLOGY= OI

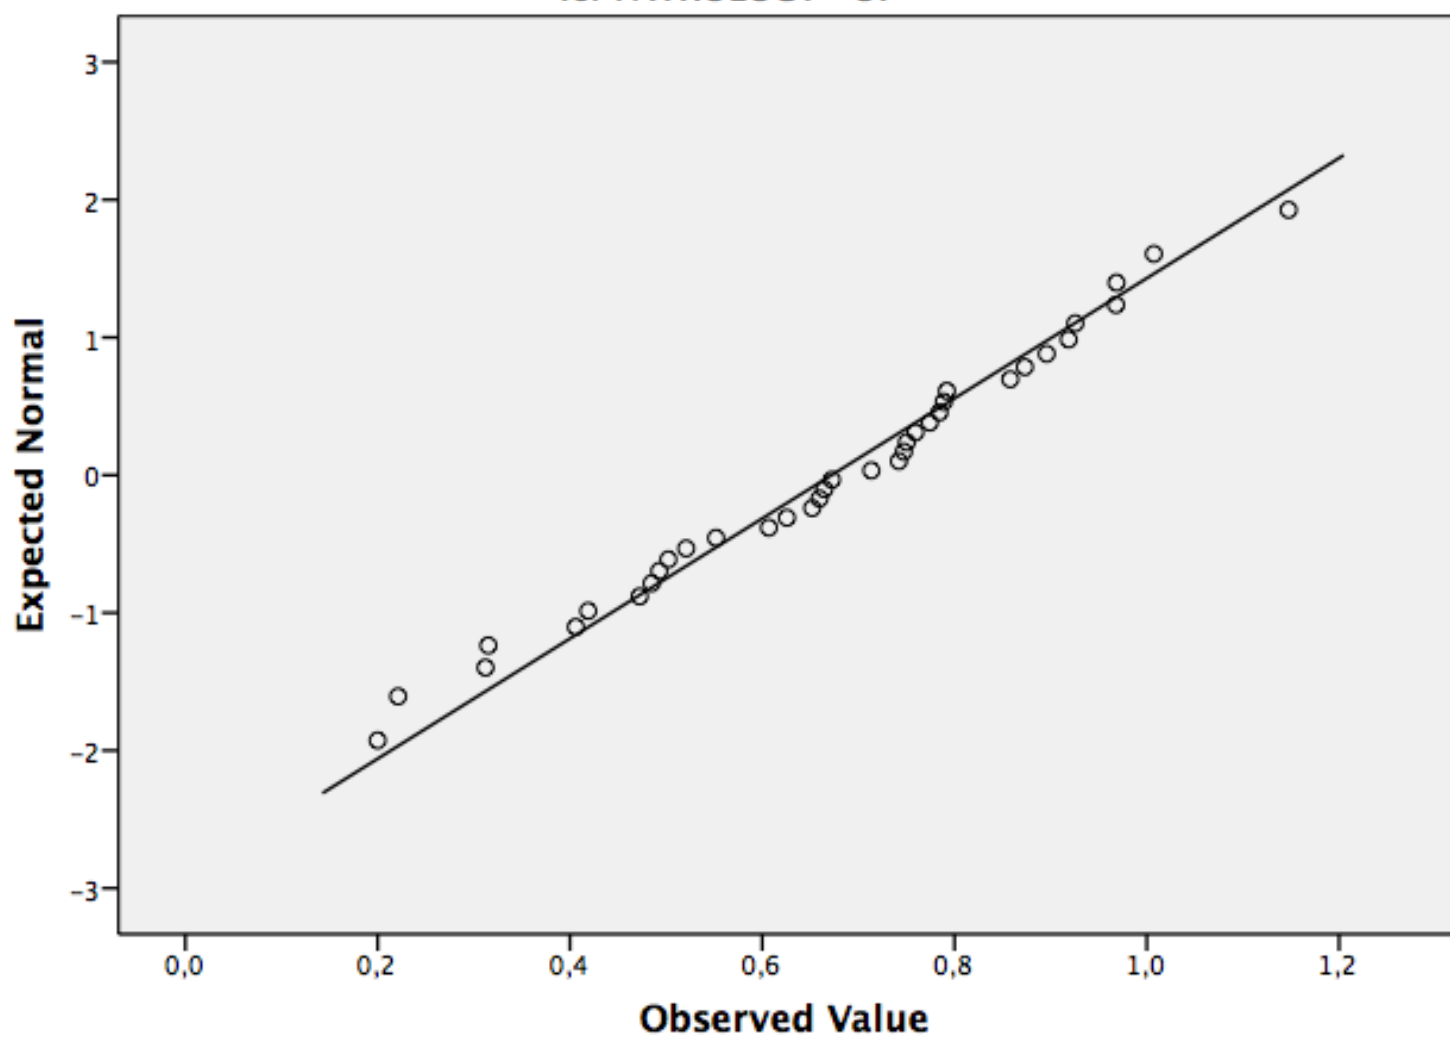

Normal Q-Q Plots

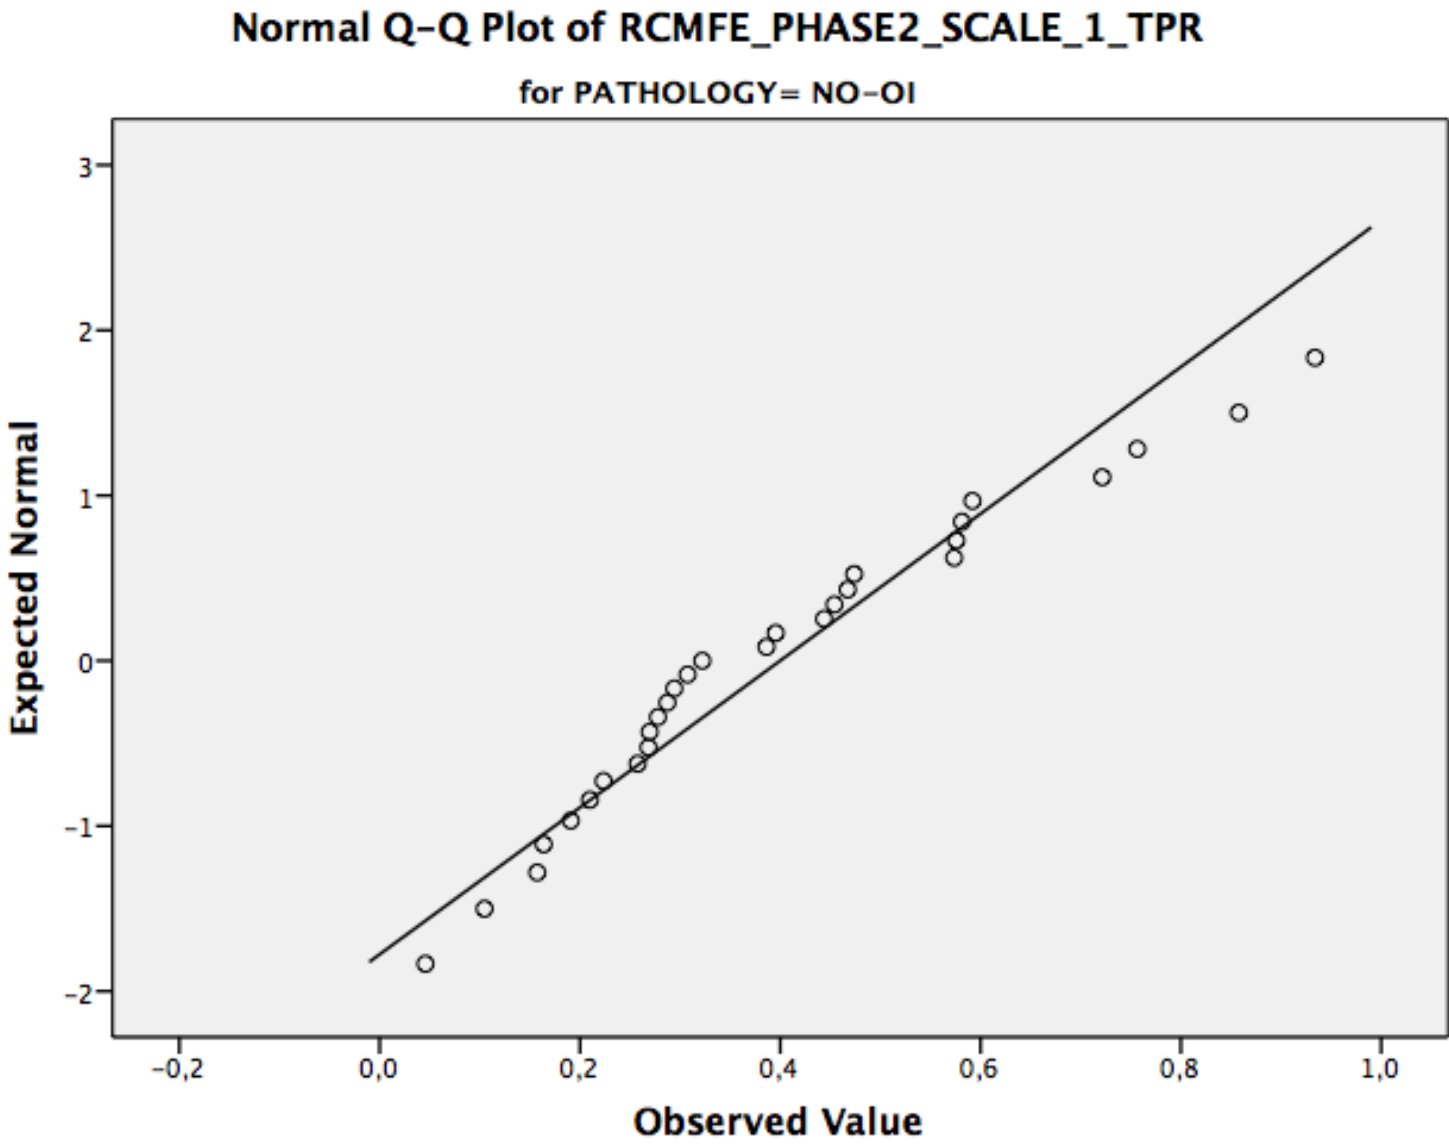

# Normal Q-Q Plot of RCMFE\_PHASE2\_SCALE\_1\_TPR

for PATHOLOGY= OI

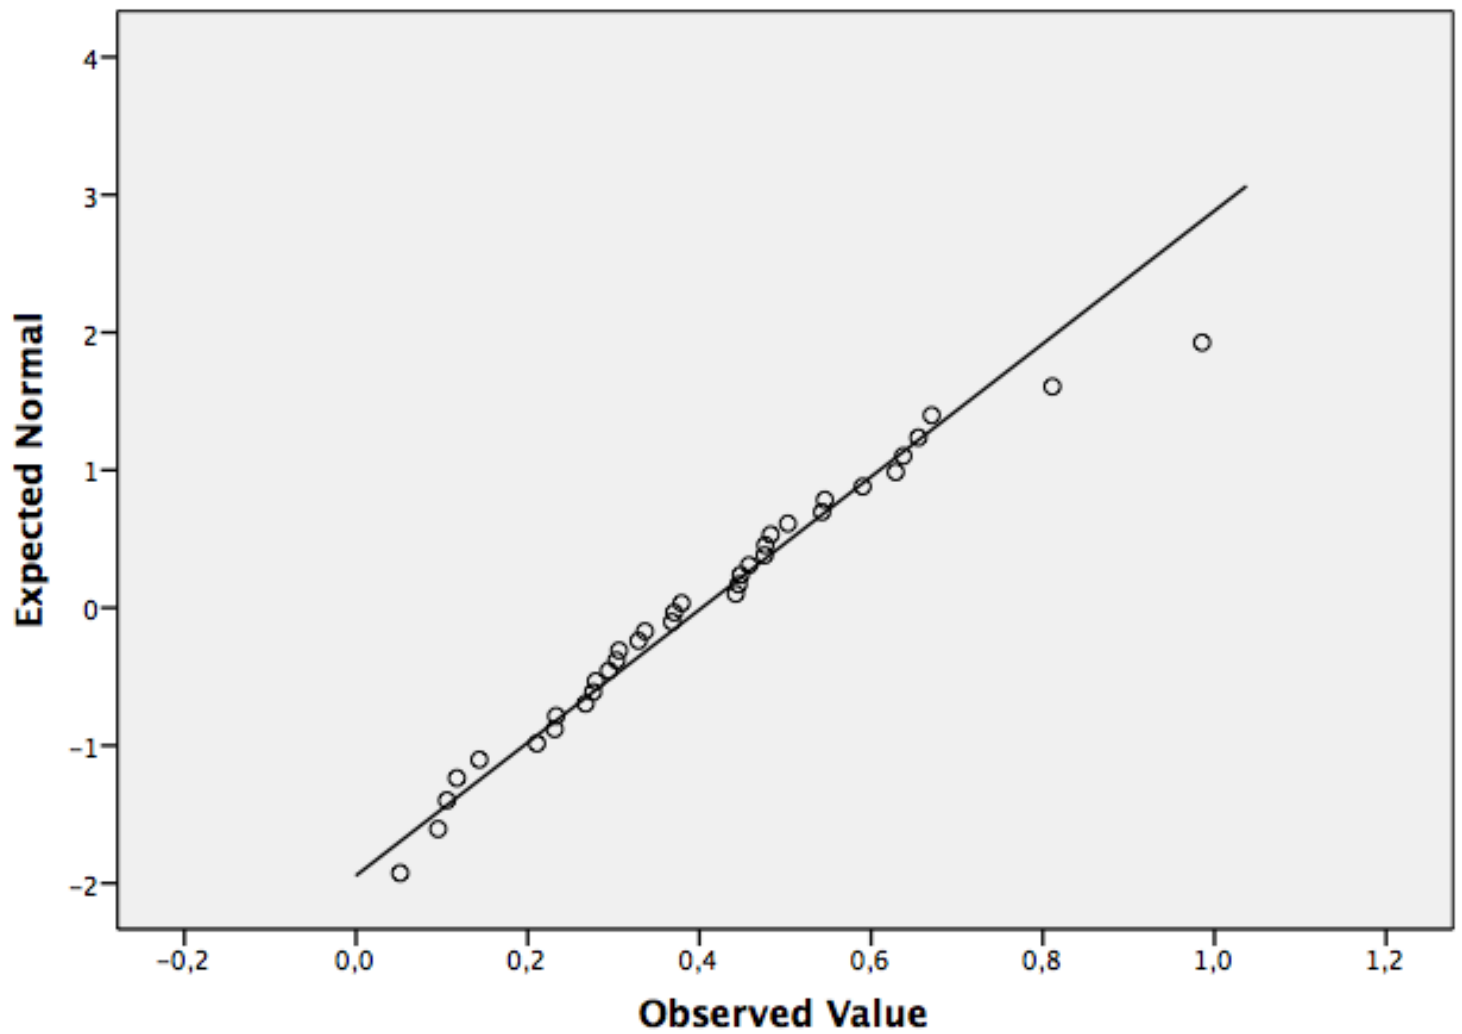

Normal Q-Q Plots

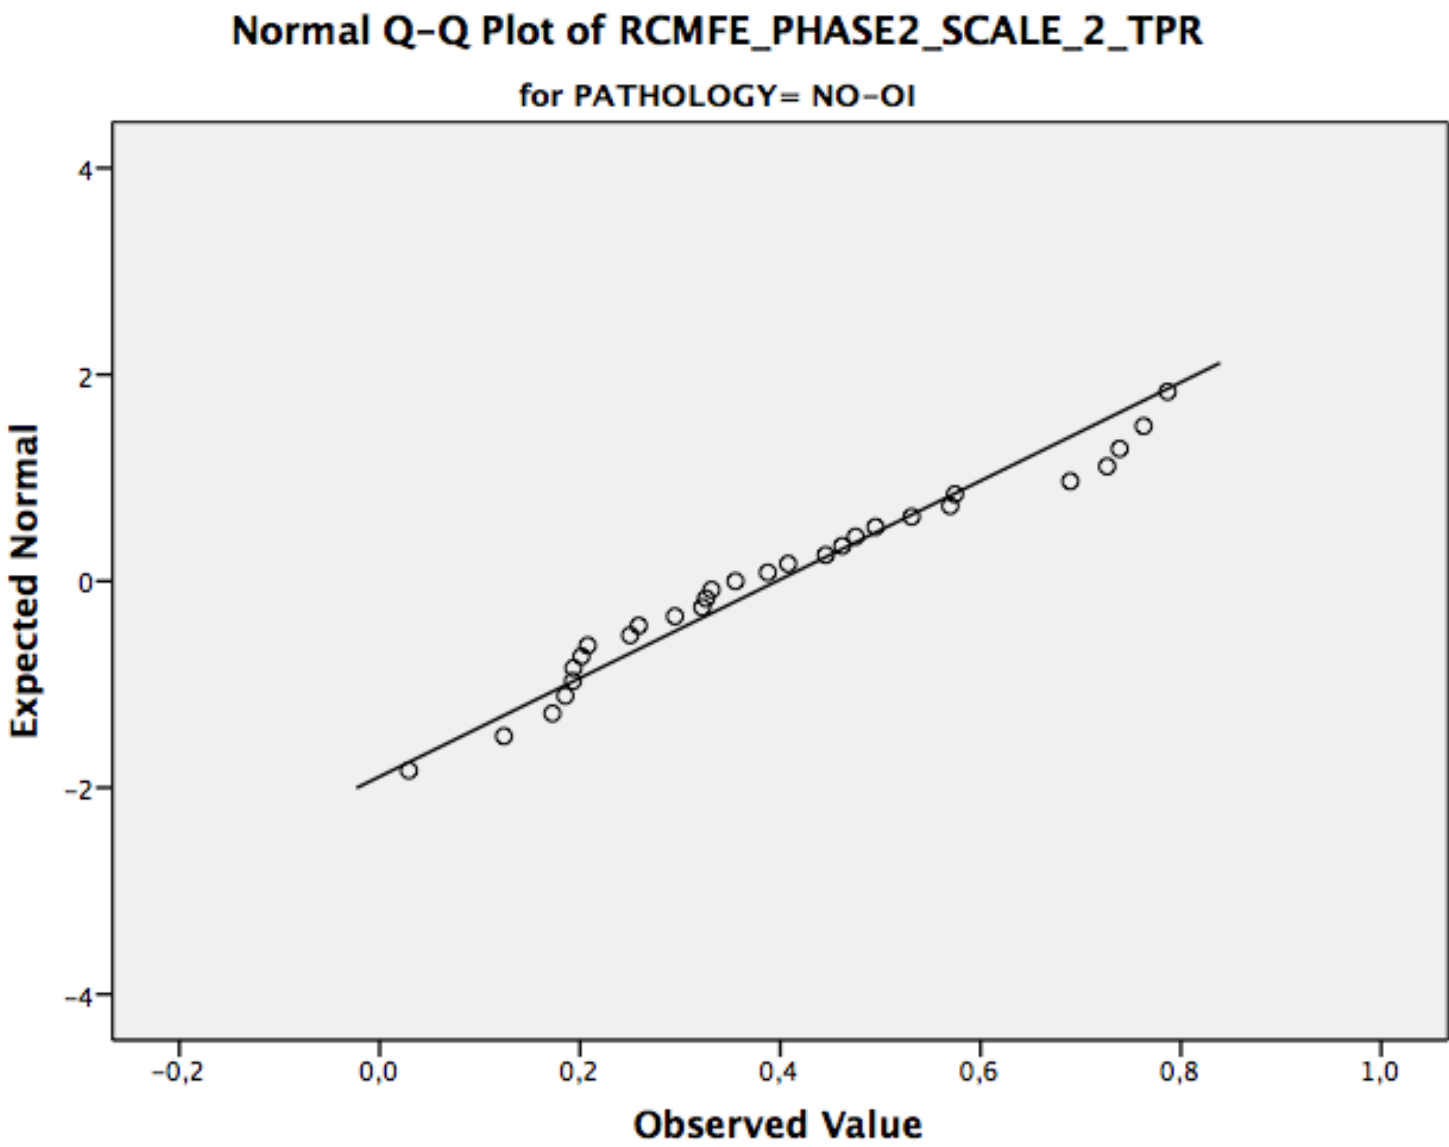

# Normal Q-Q Plot of RCMFE\_PHASE2\_SCALE\_2\_TPR

for PATHOLOGY= OI

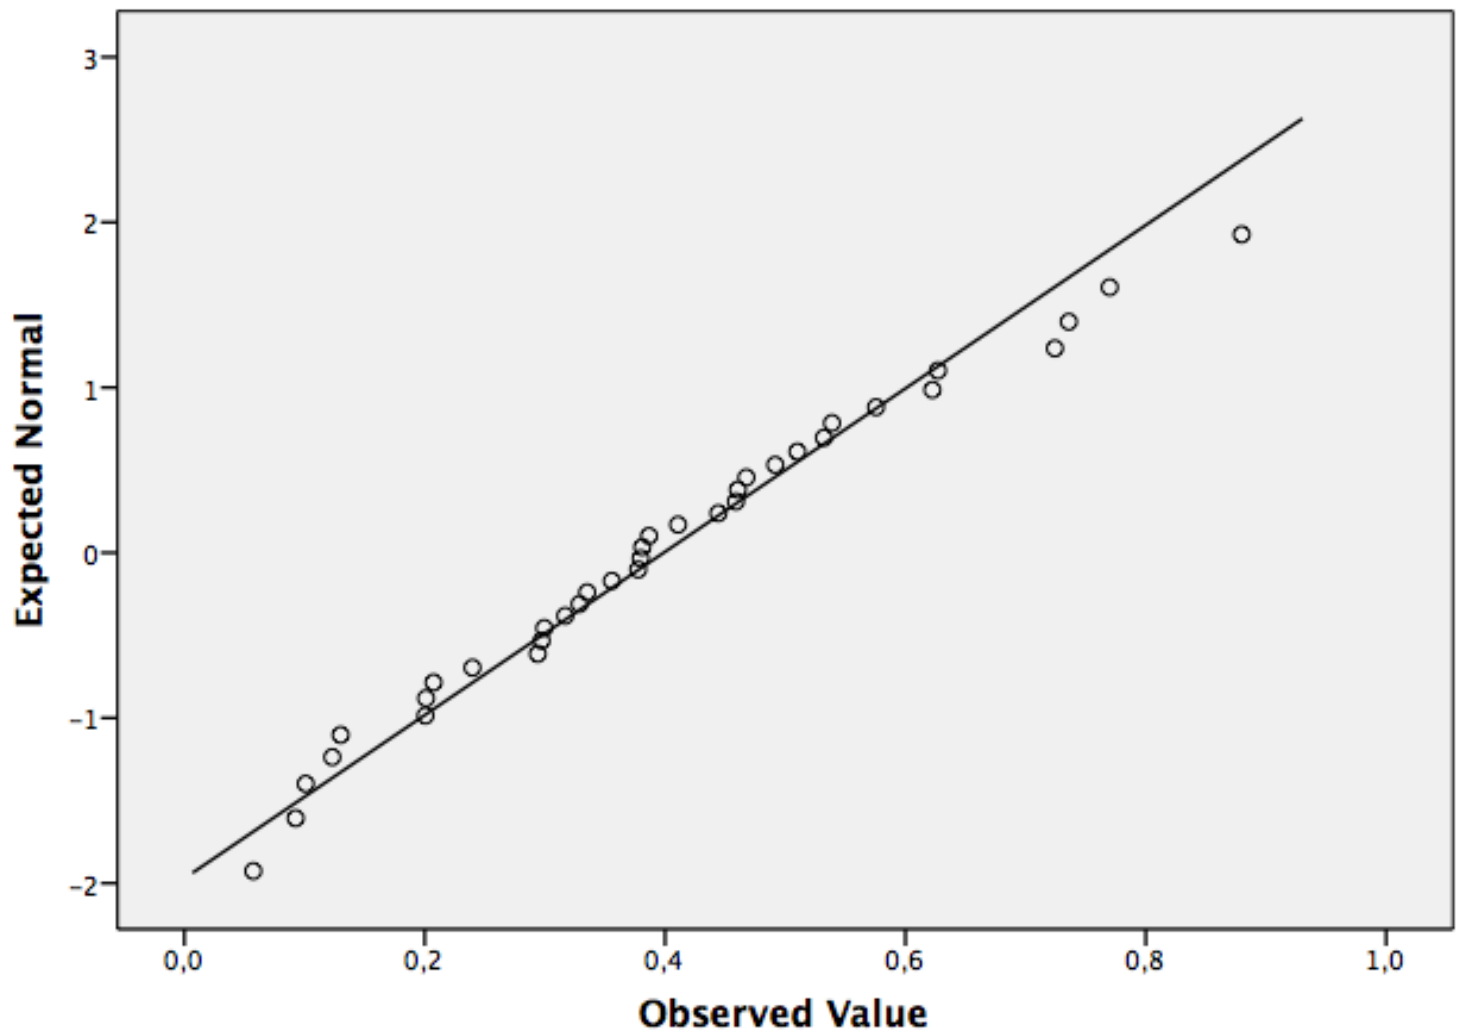

Normal Q-Q Plots

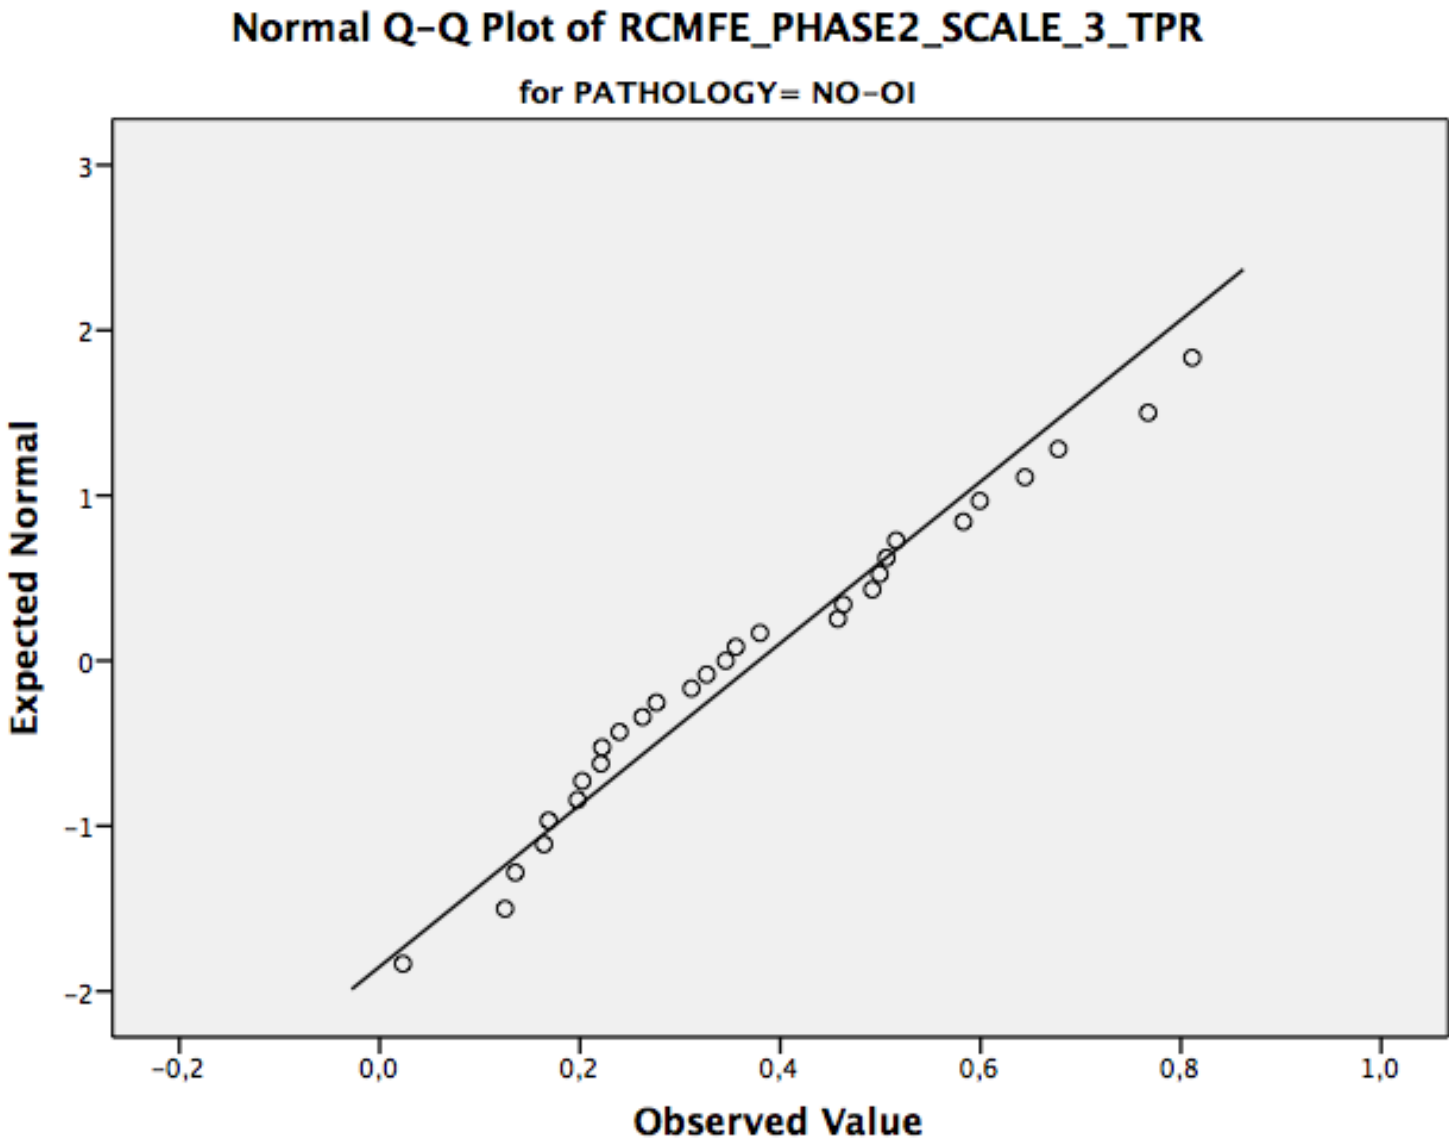

# Normal Q-Q Plot of RCMFE\_PHASE2\_SCALE\_3\_TPR

for PATHOLOGY= OI

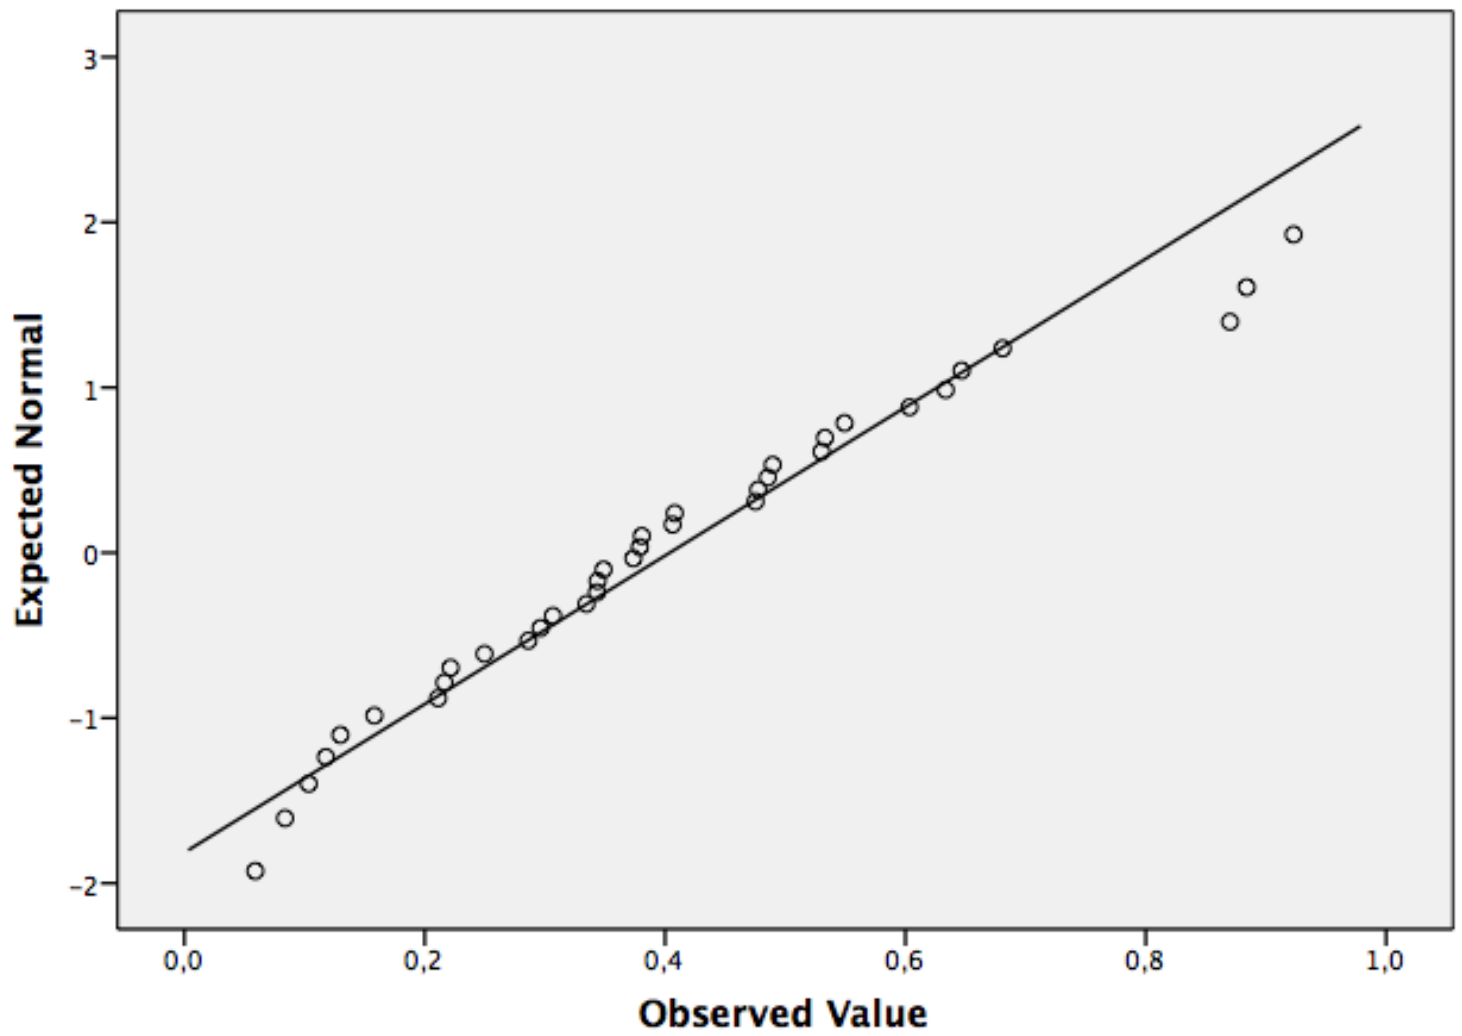



Normal Q-Q Plots

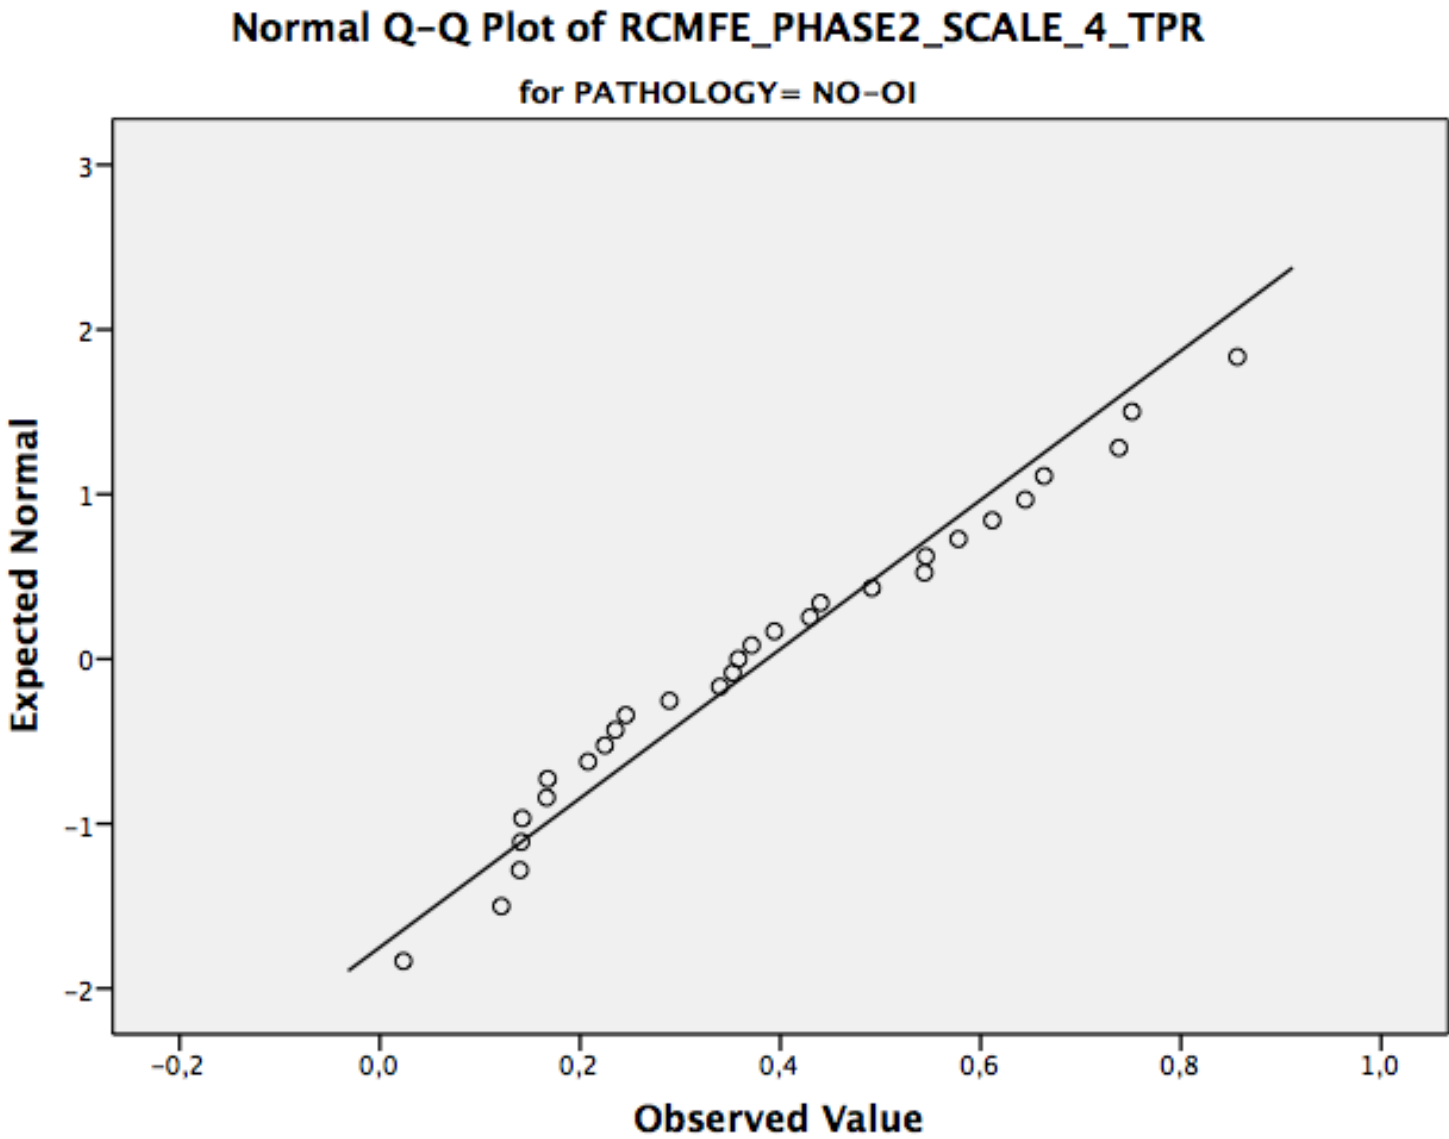

# Normal Q-Q Plot of RCMFE\_PHASE2\_SCALE\_4\_TPR

for PATHOLOGY= OI

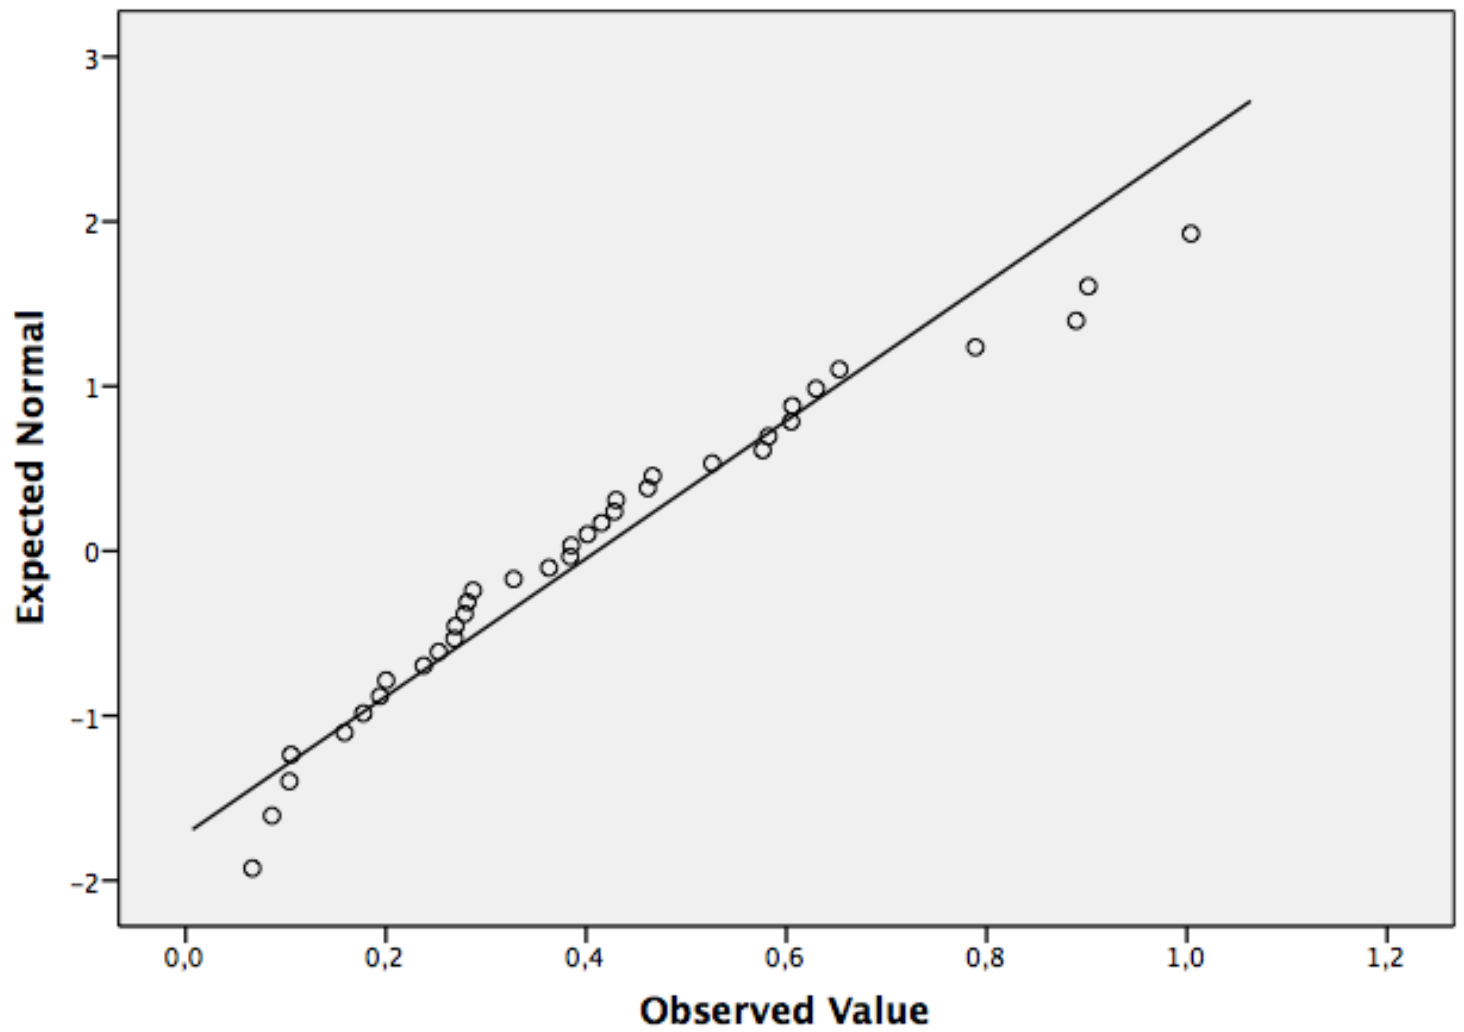

Normal Q-Q Plots

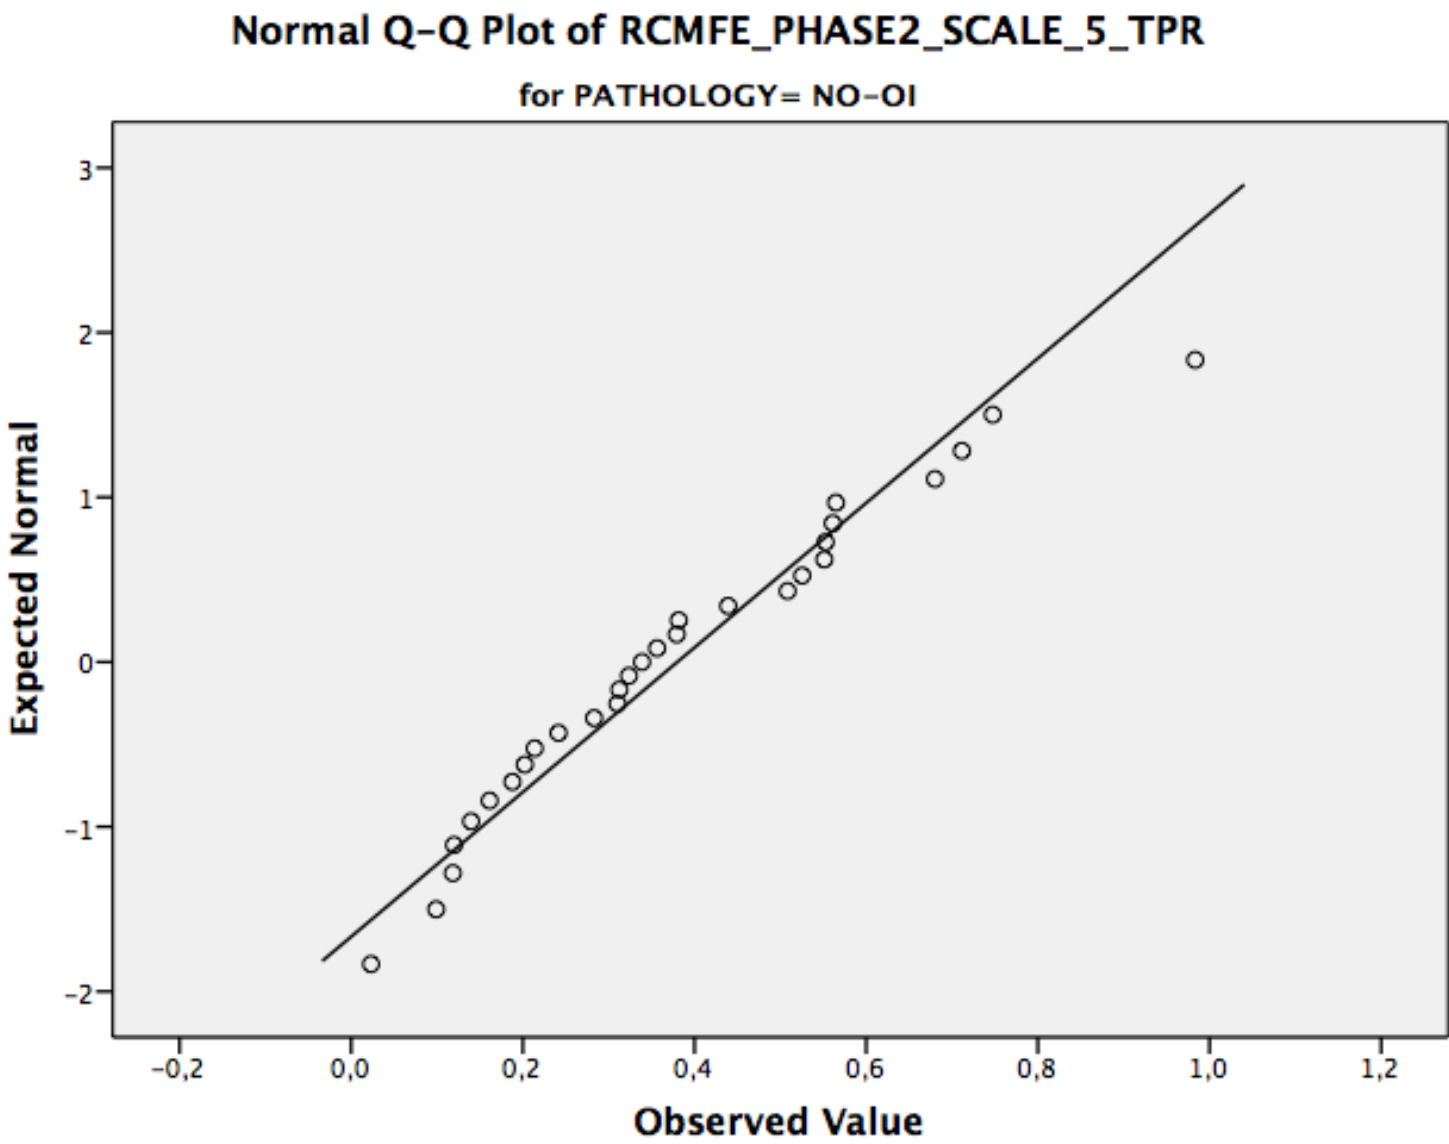

# Normal Q-Q Plot of RCMFE\_PHASE2\_SCALE\_5\_TPR

for PATHOLOGY= OI

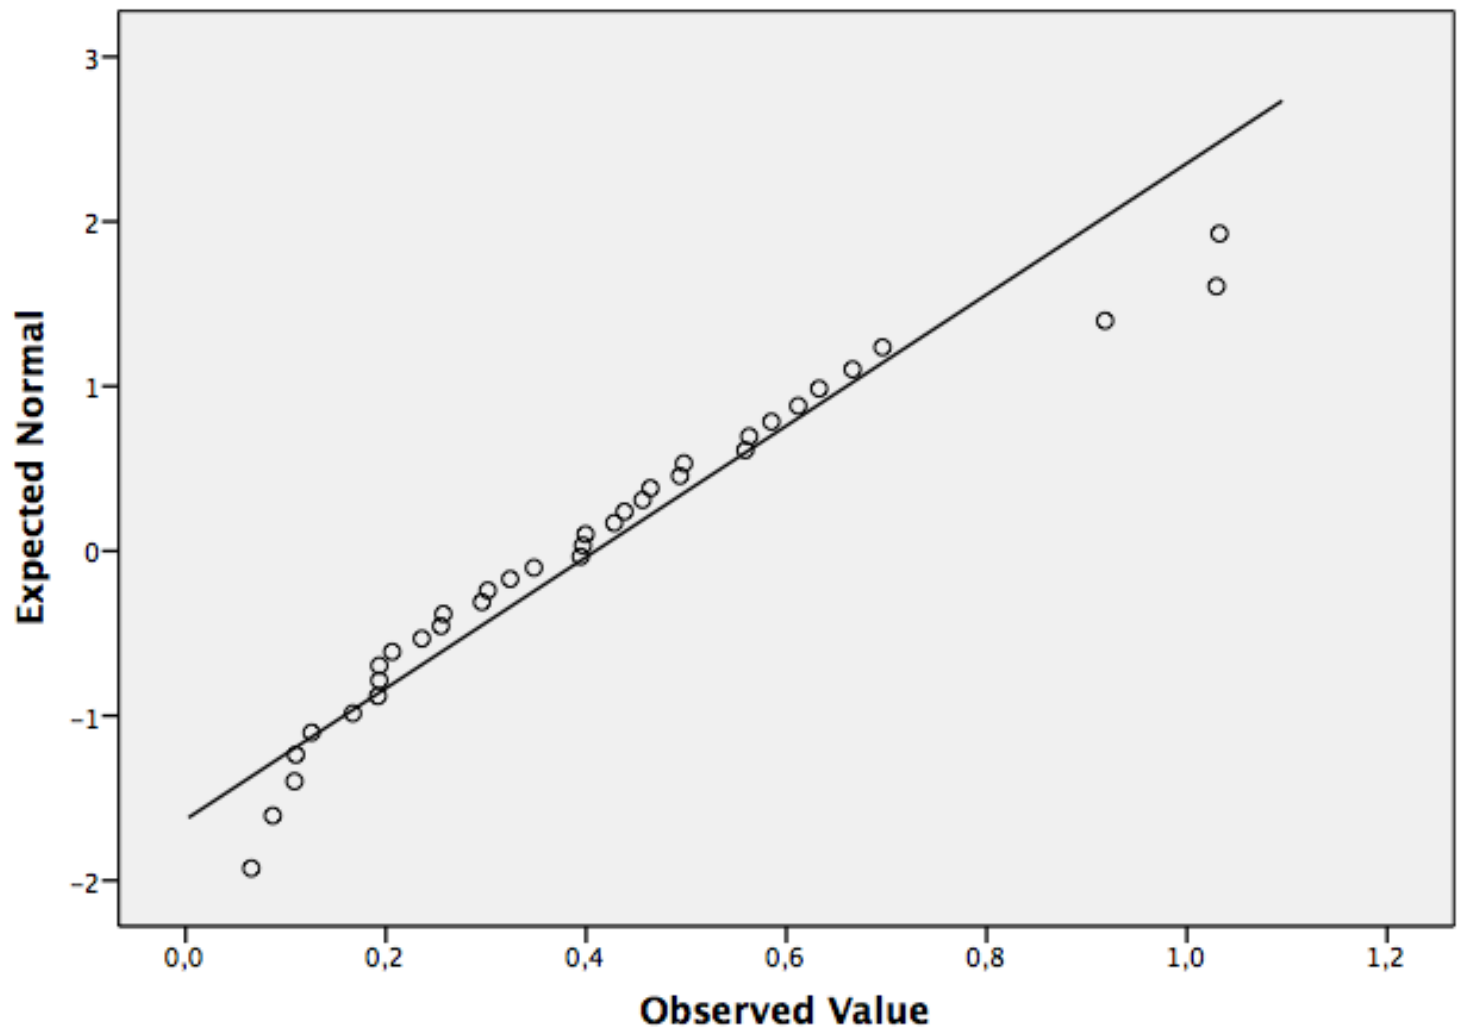

Normal Q-Q Plots

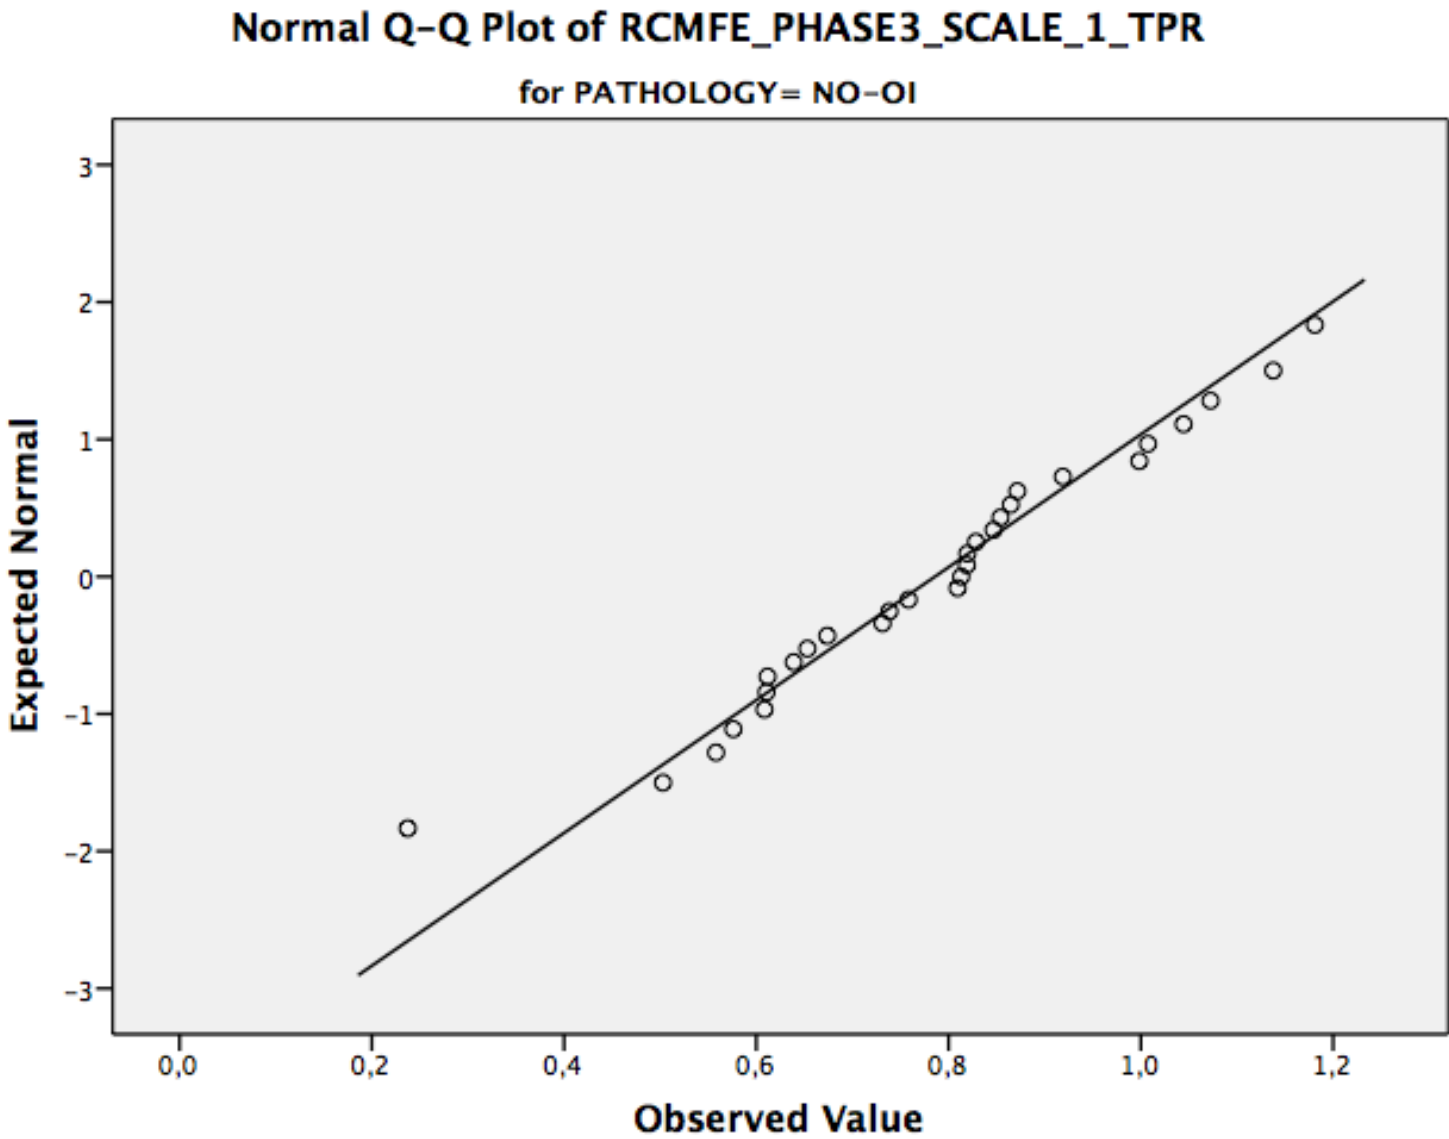

# Normal Q-Q Plot of RCMFE\_PHASE3\_SCALE\_1\_TPR

for PATHOLOGY= OI

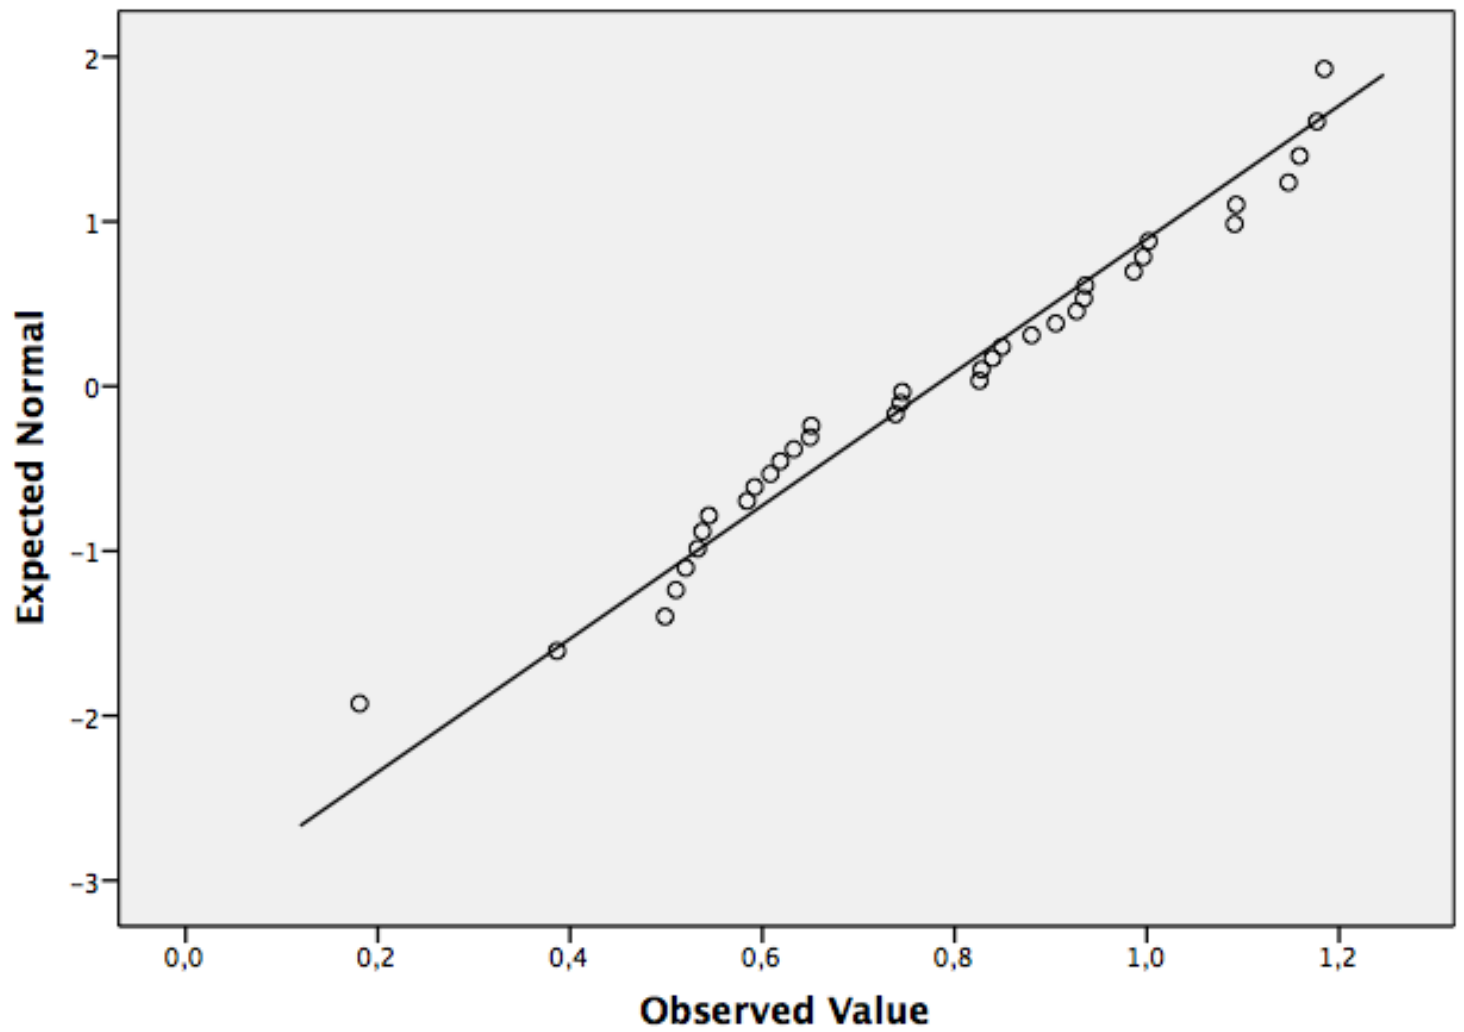

Normal Q-Q Plots

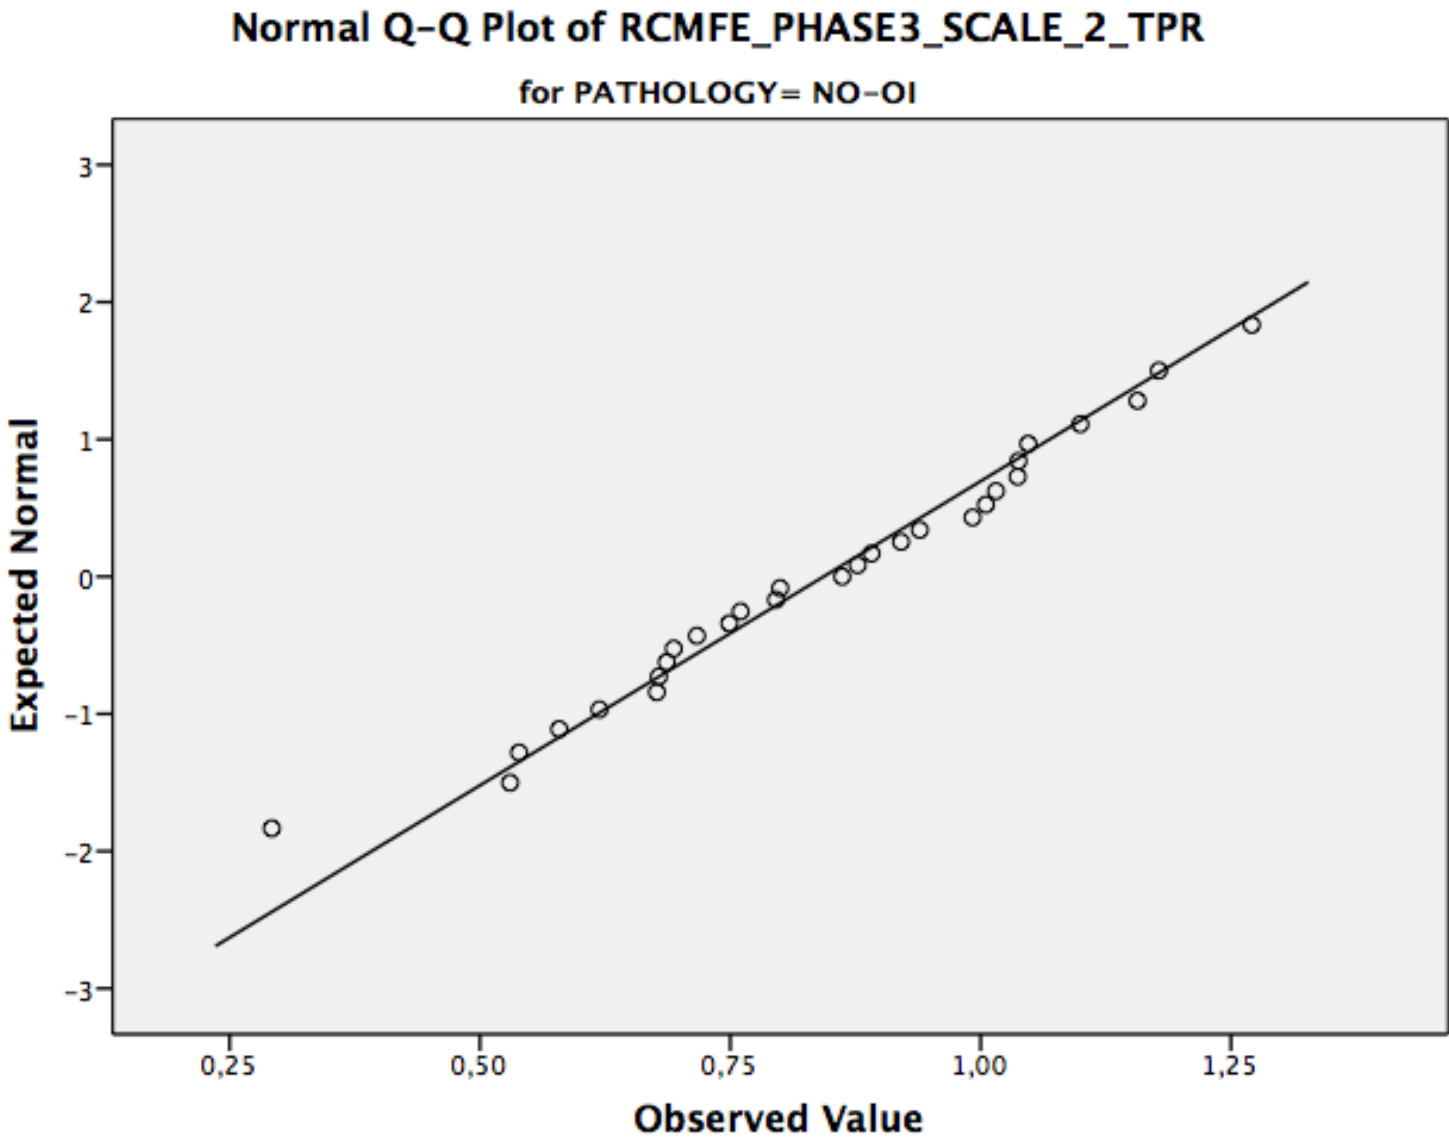

# Normal Q-Q Plot of RCMFE\_PHASE3\_SCALE\_2\_TPR

for PATHOLOGY= OI

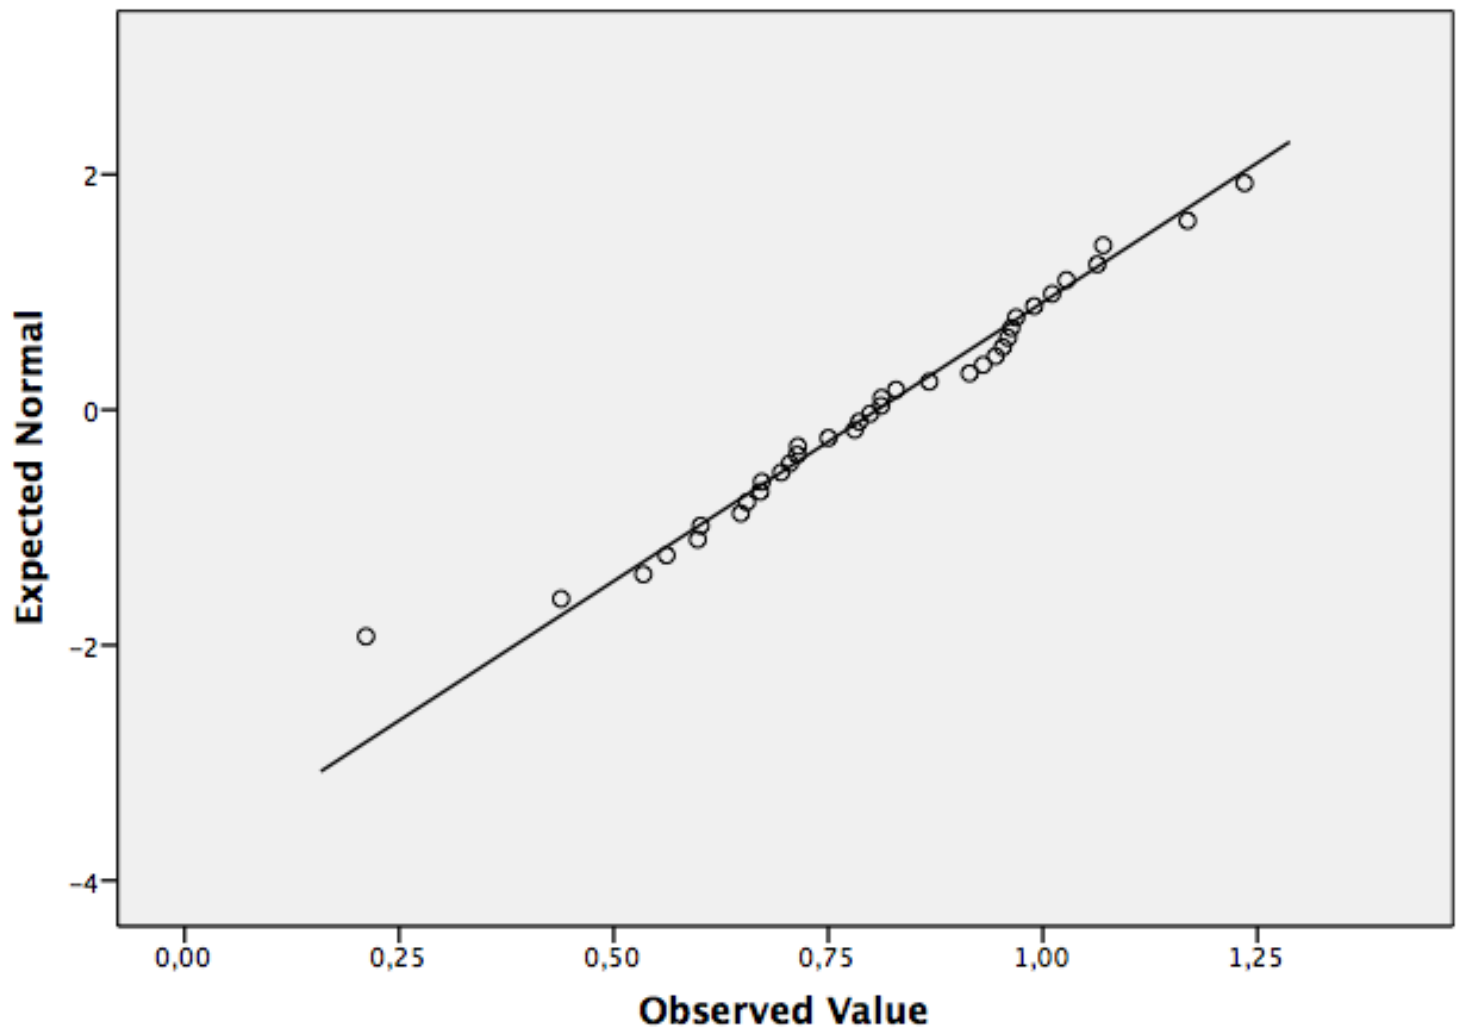



Normal Q-Q Plots

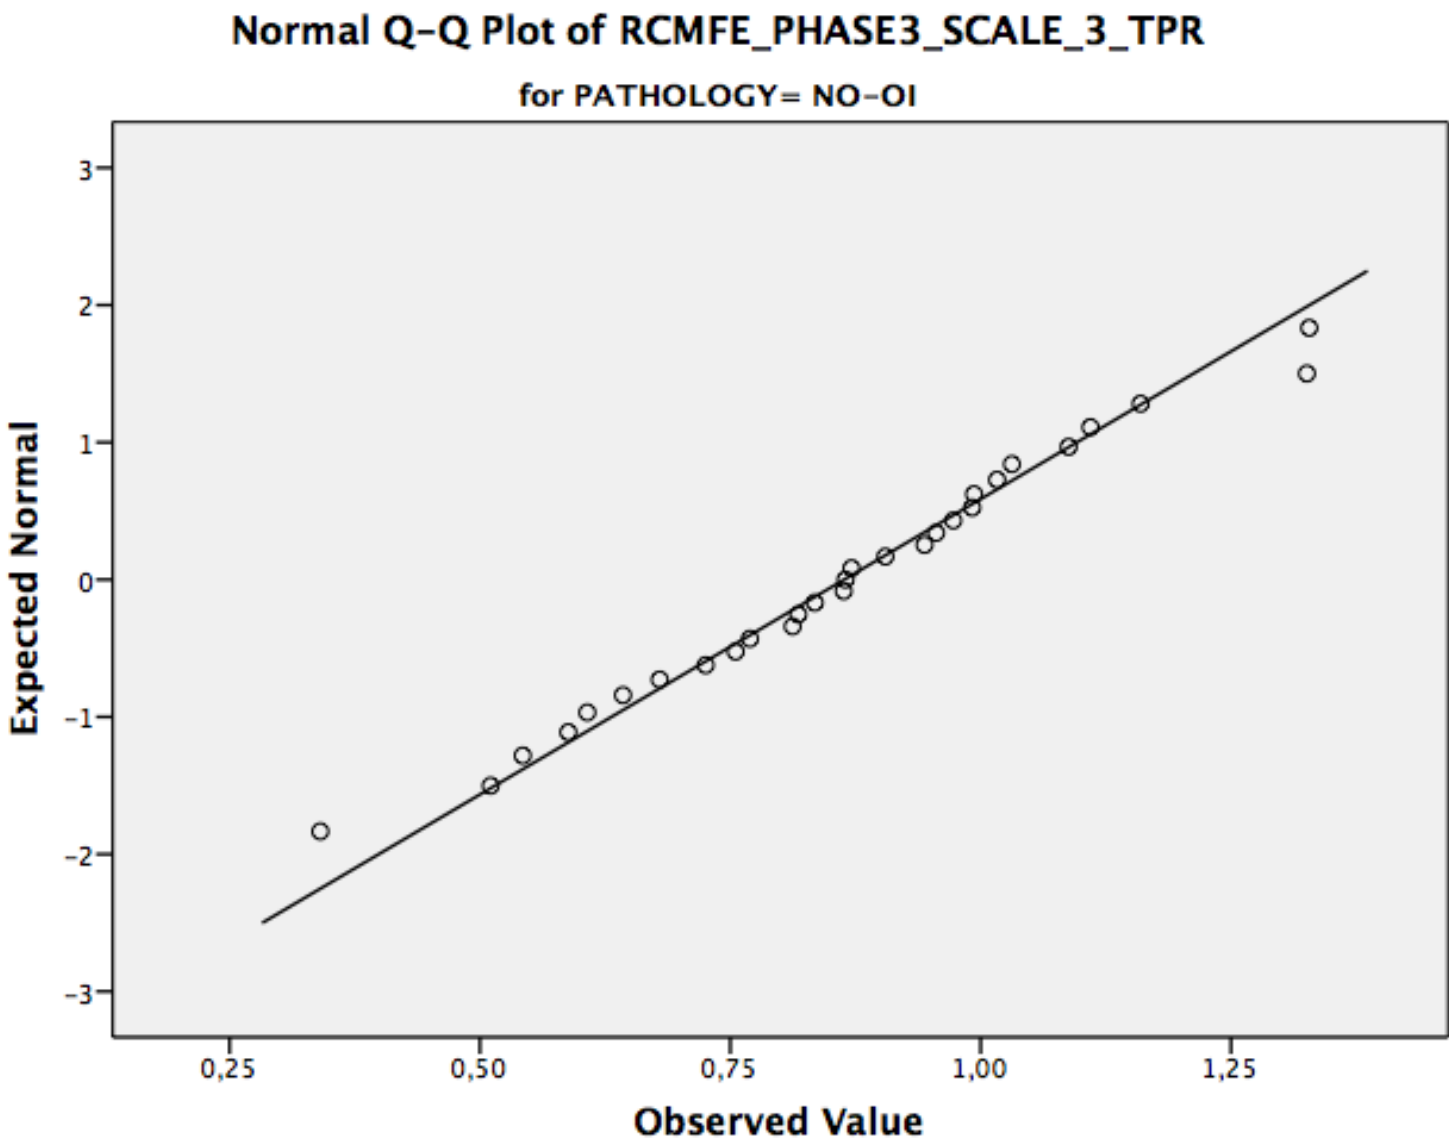

# Normal Q-Q Plot of RCMFE\_PHASE3\_SCALE\_3\_TPR

for PATHOLOGY= OI

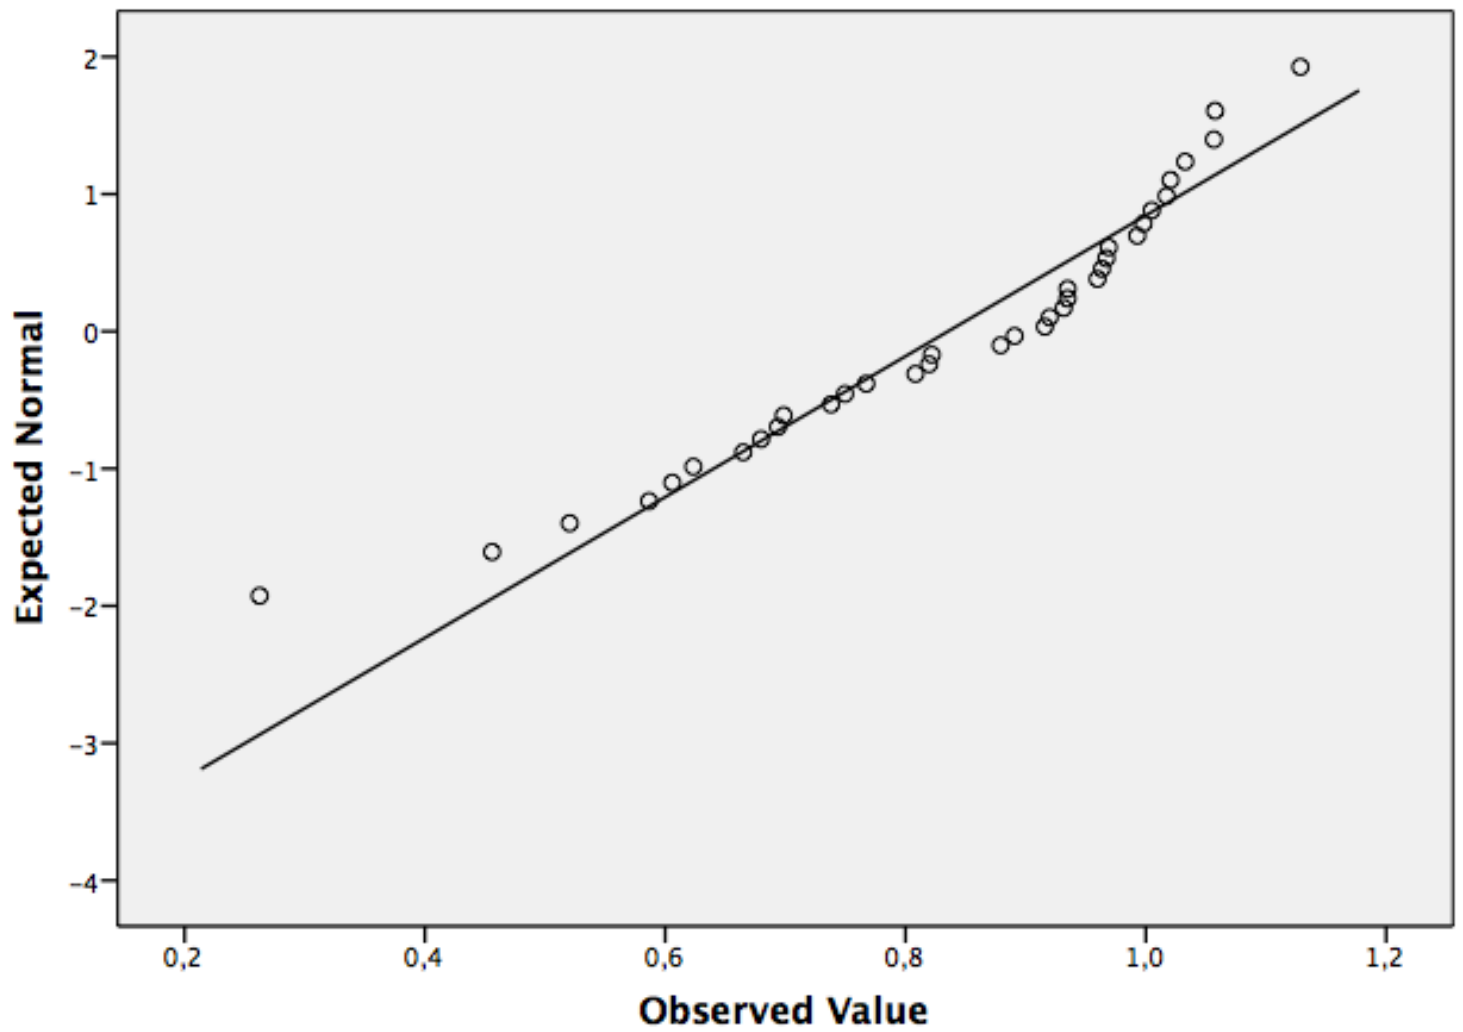

Normal Q-Q Plots

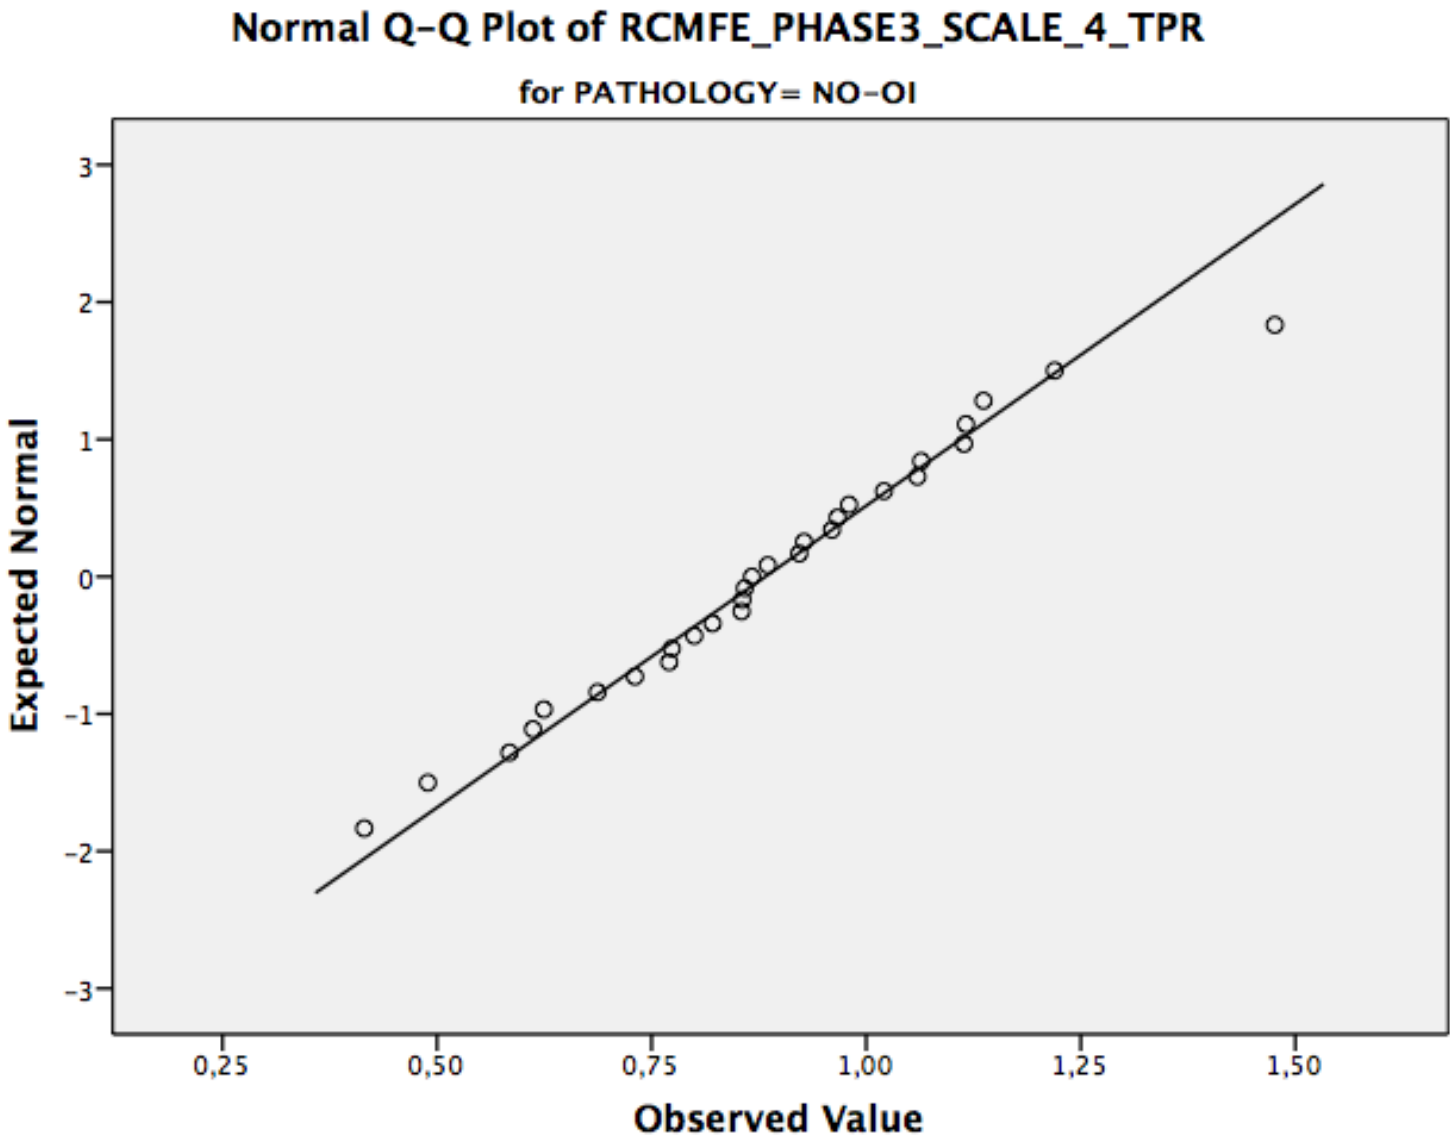

# Normal Q-Q Plot of RCMFE\_PHASE3\_SCALE\_4\_TPR

for PATHOLOGY= OI

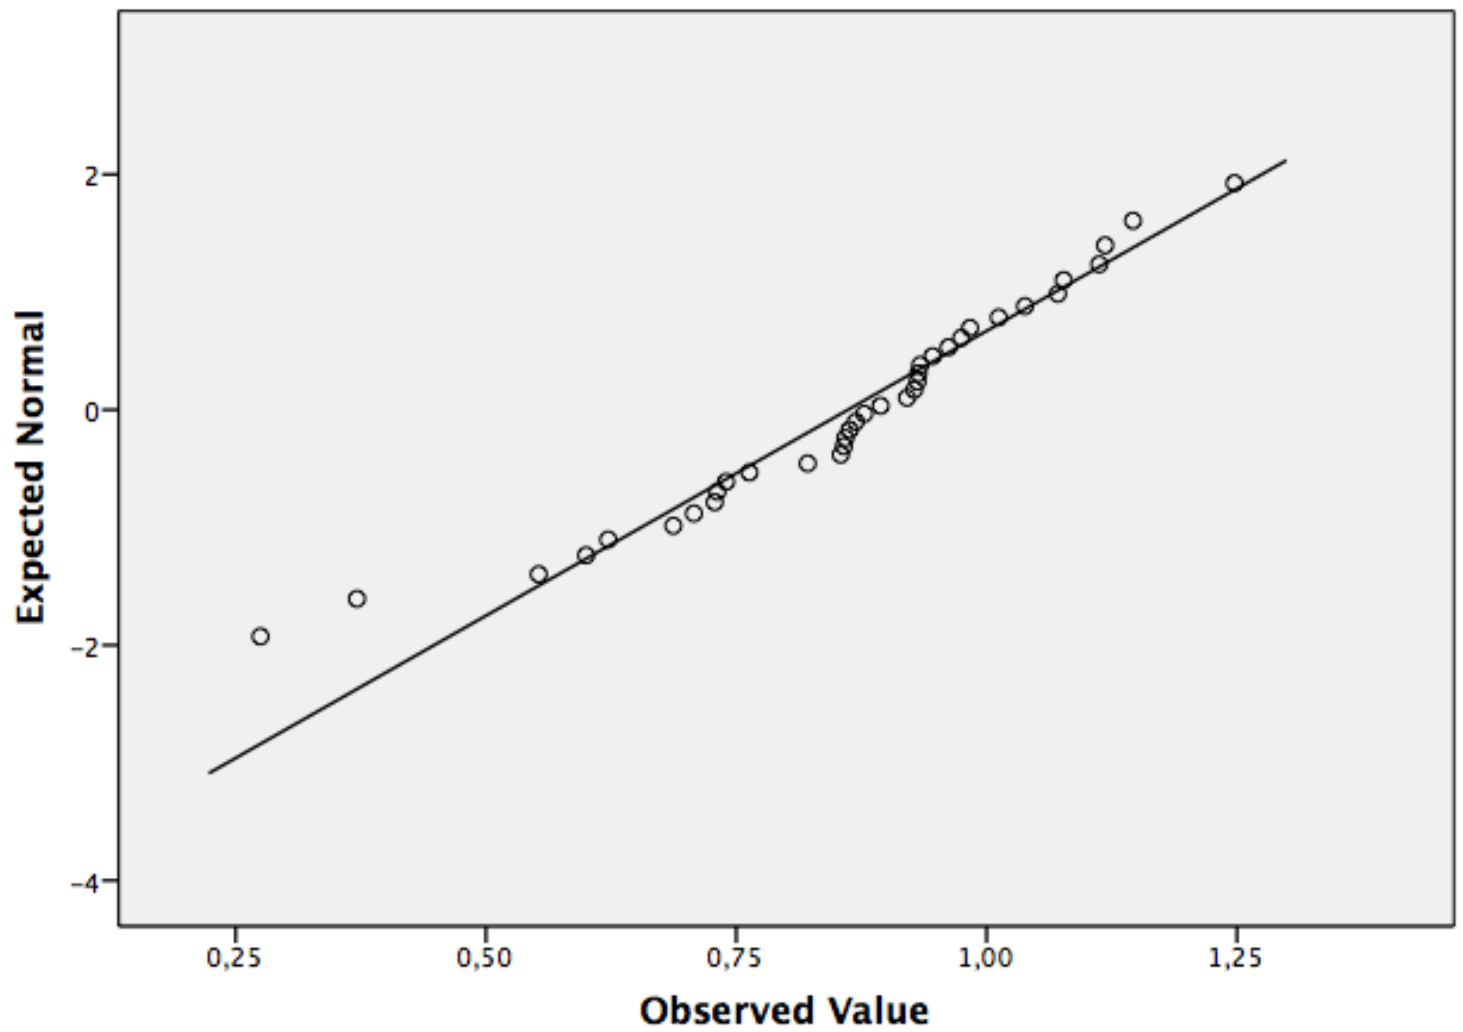

Normal Q-Q Plots

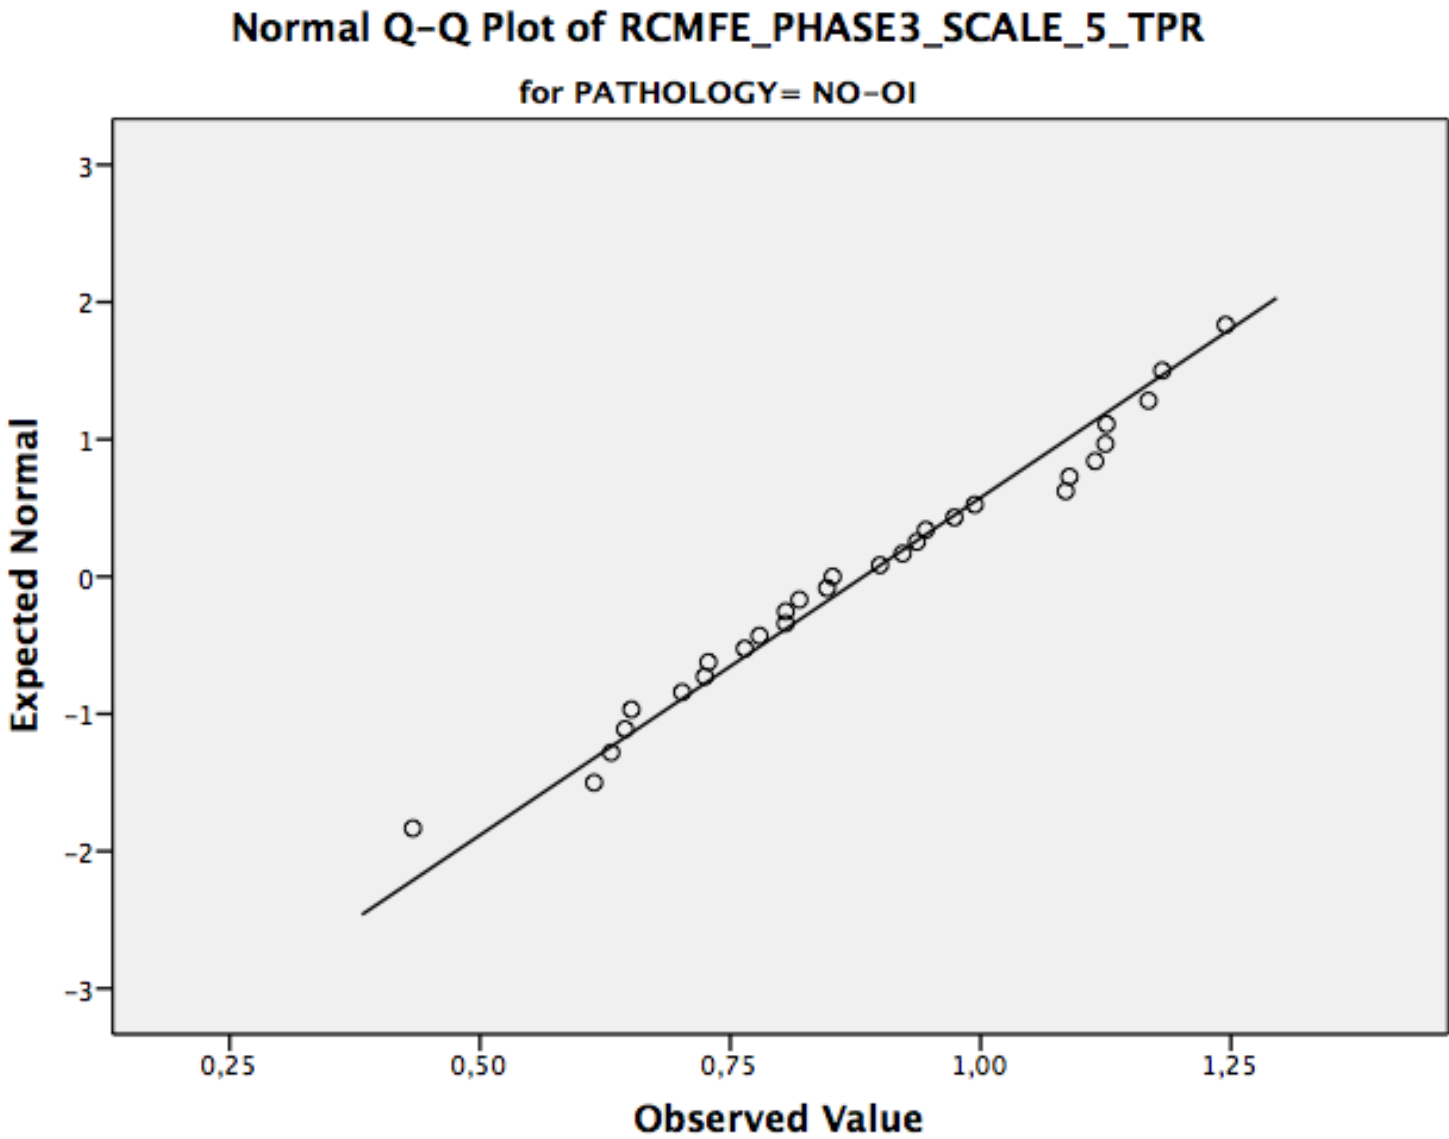

# Normal Q-Q Plot of RCMFE\_PHASE3\_SCALE\_5\_TPR

for PATHOLOGY= OI

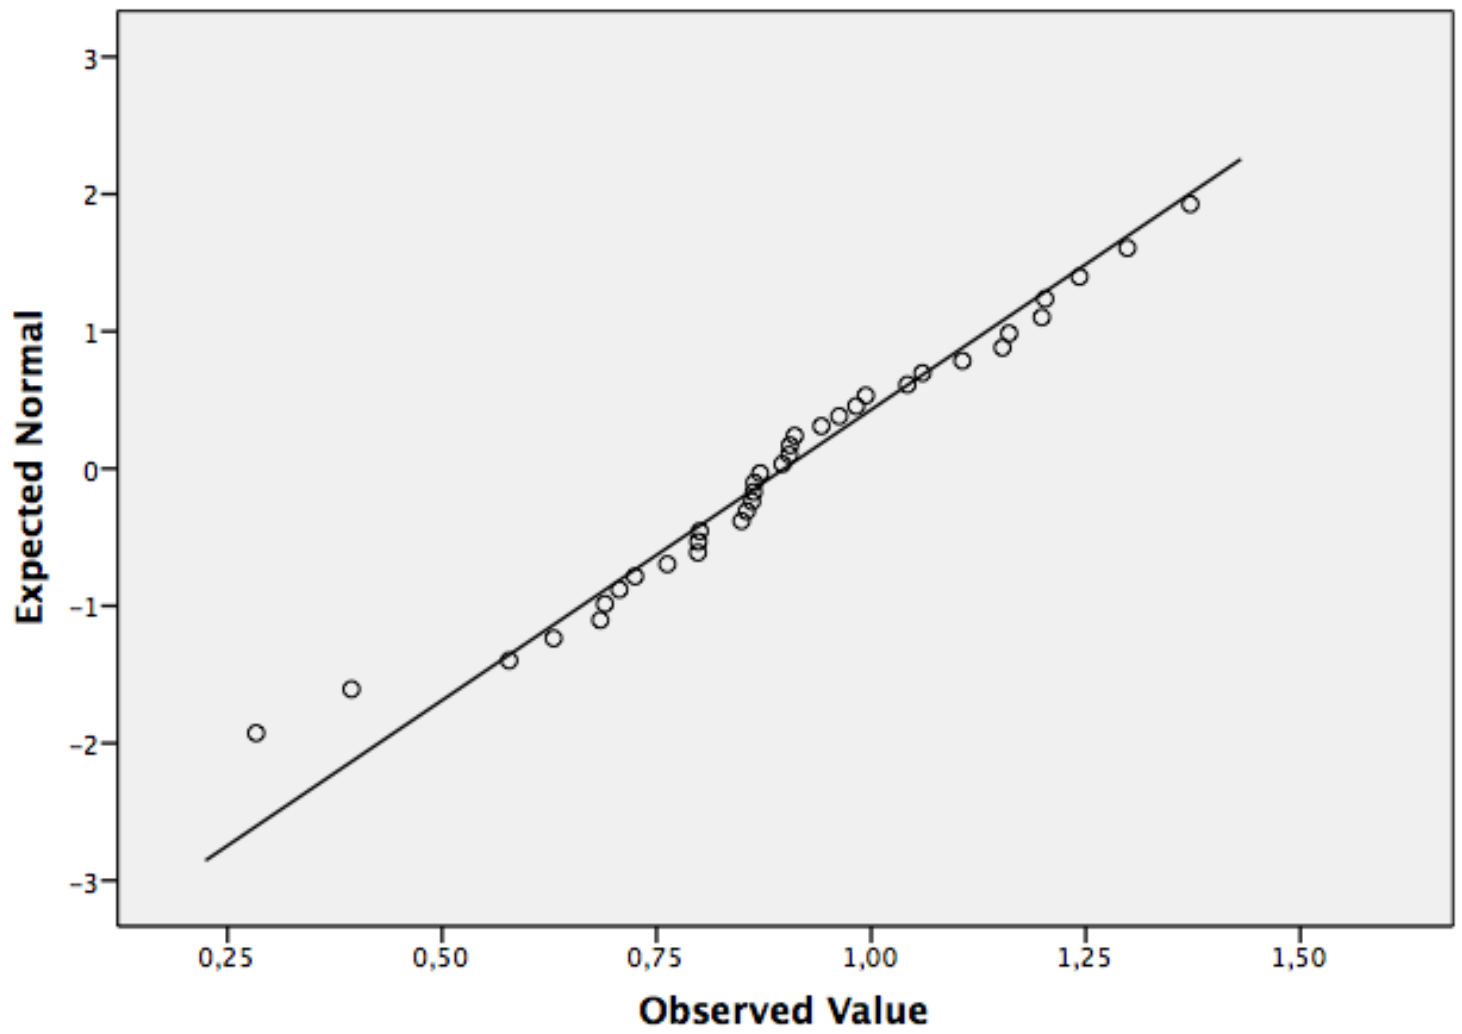

Normal Q-Q Plots

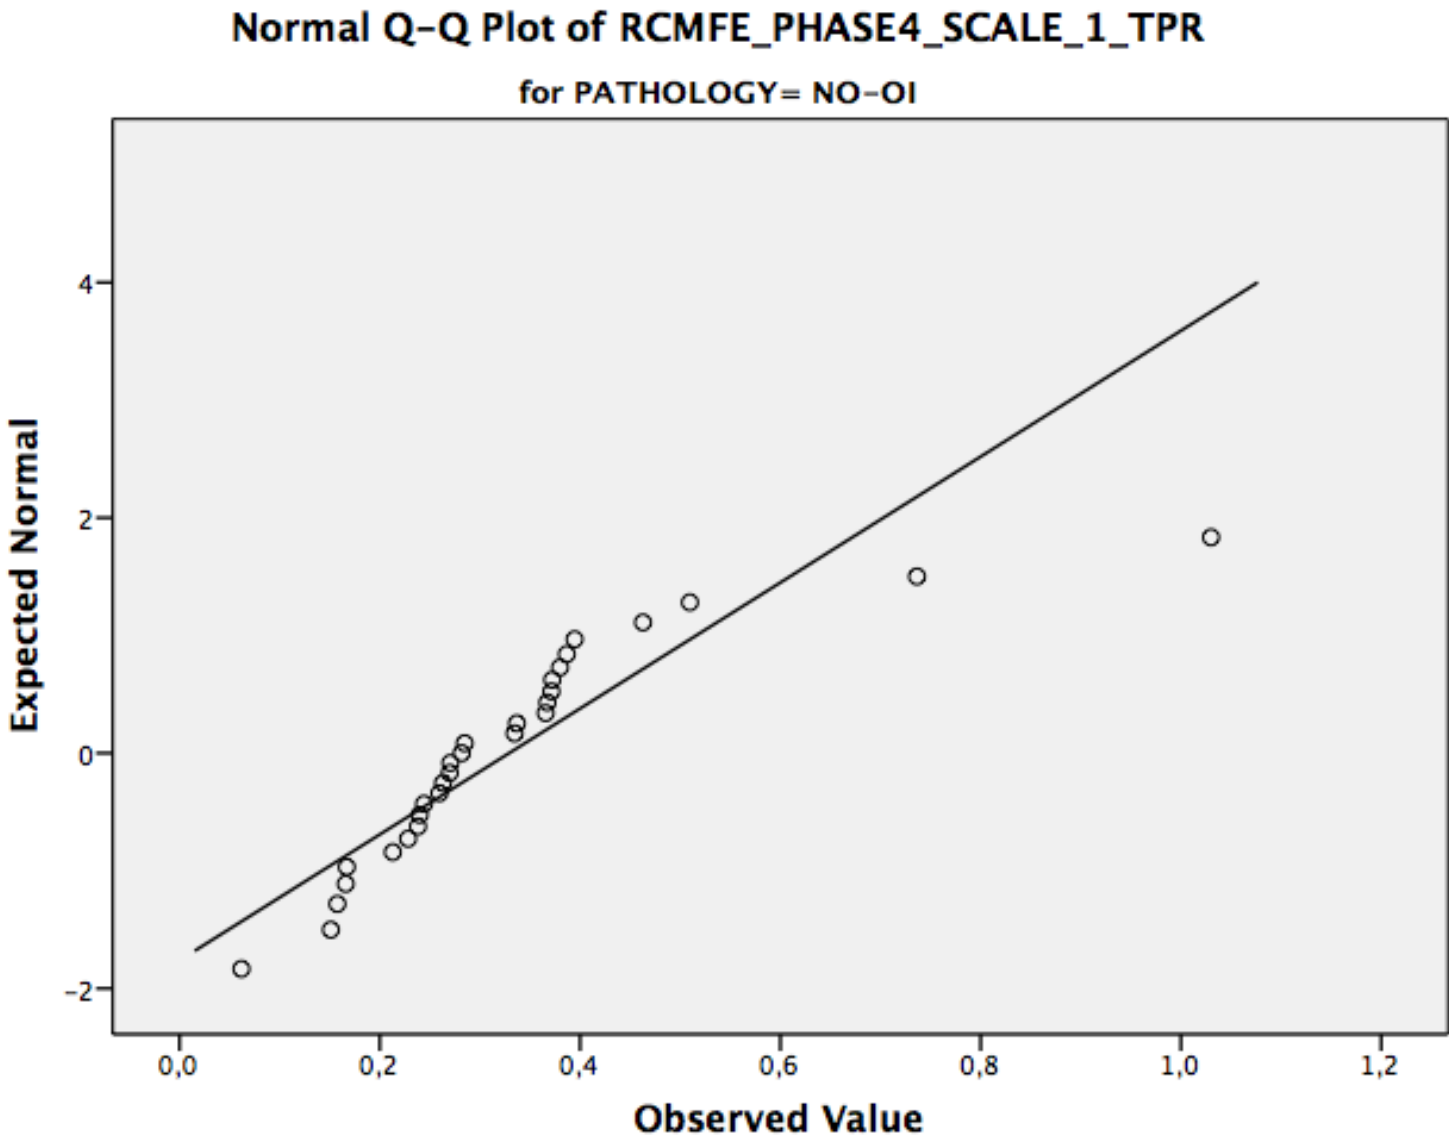

# Normal Q-Q Plot of RCMFE\_PHASE4\_SCALE\_1\_TPR

for PATHOLOGY= OI

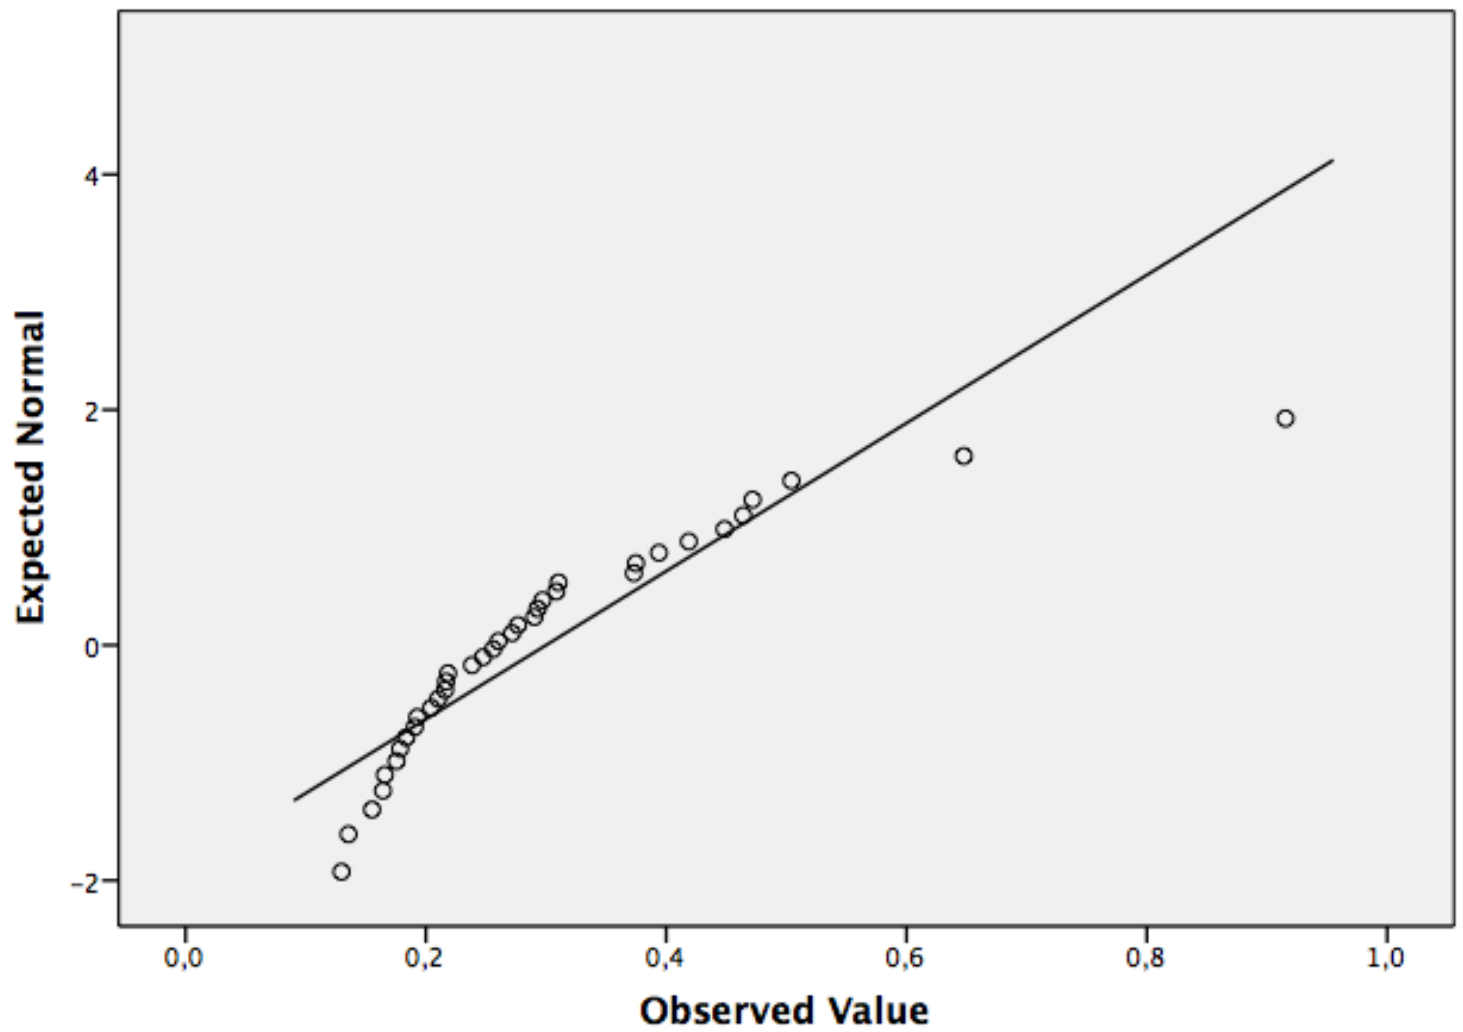



Normal Q-Q Plots

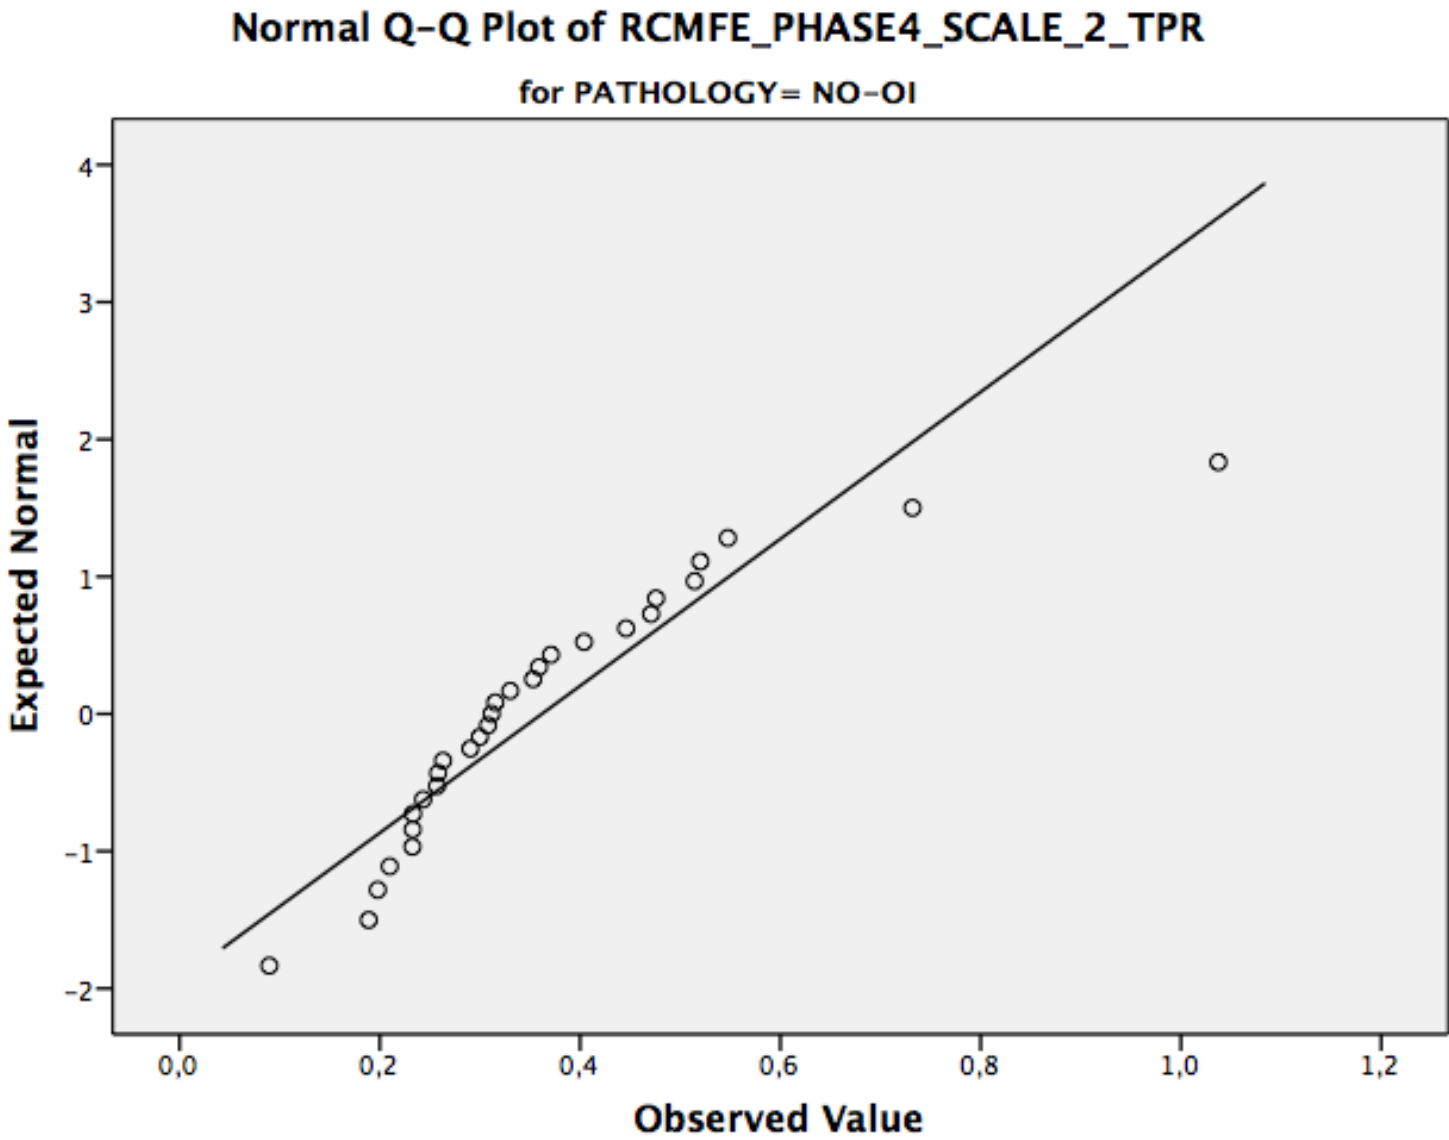

# Normal Q-Q Plot of RCMFE\_PHASE4\_SCALE\_2\_TPR

for PATHOLOGY= OI

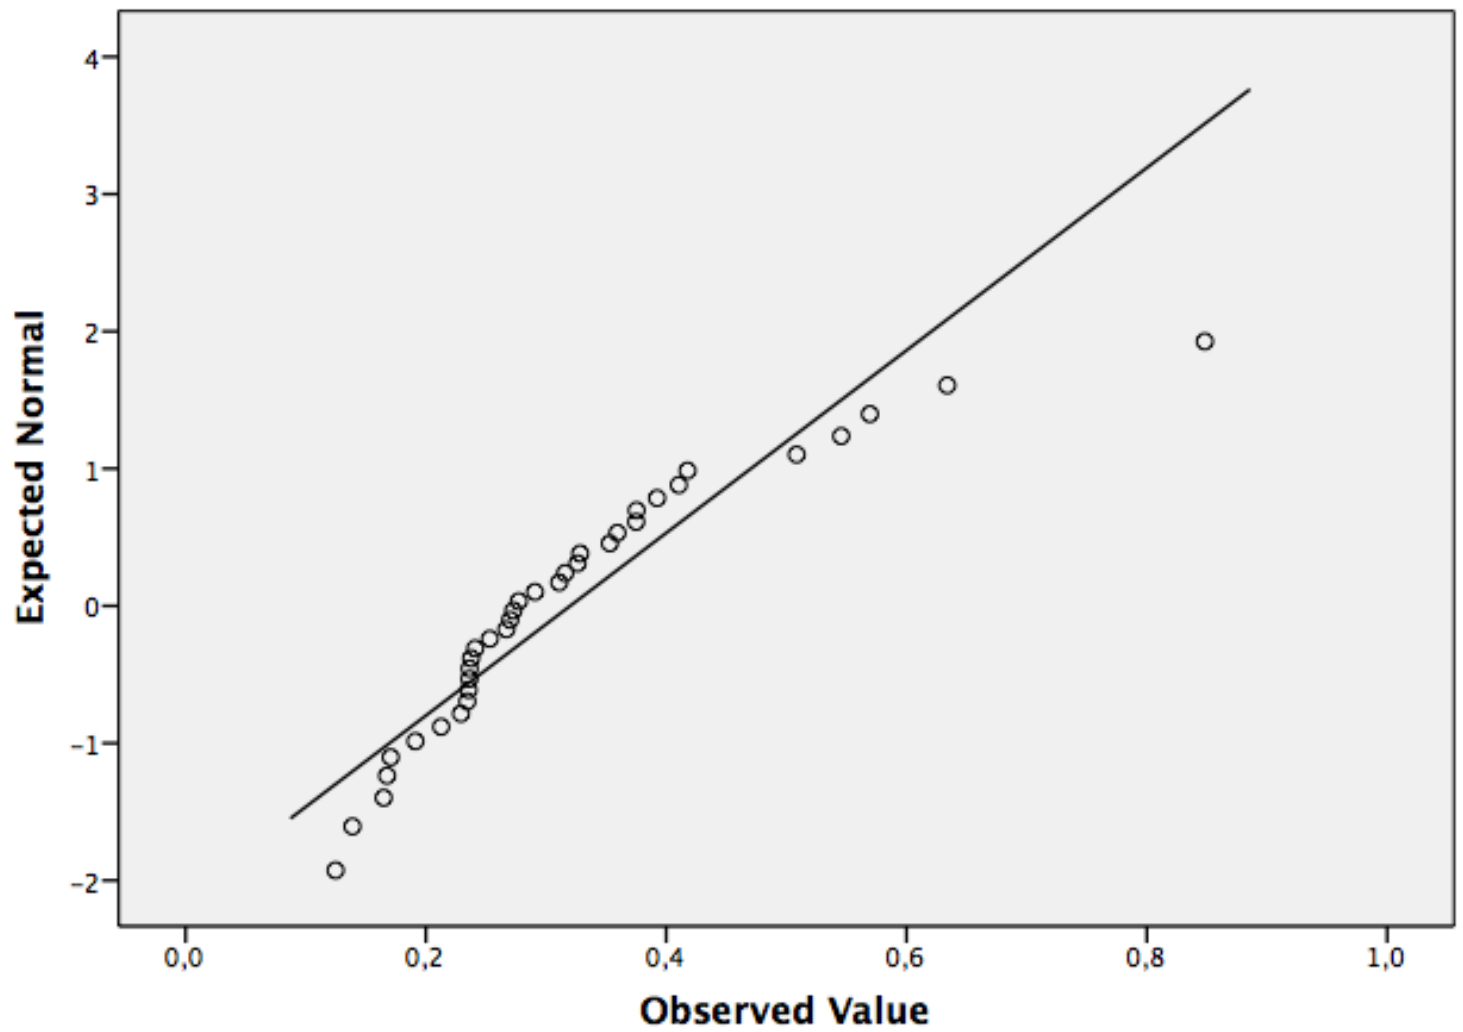

Normal Q-Q Plots

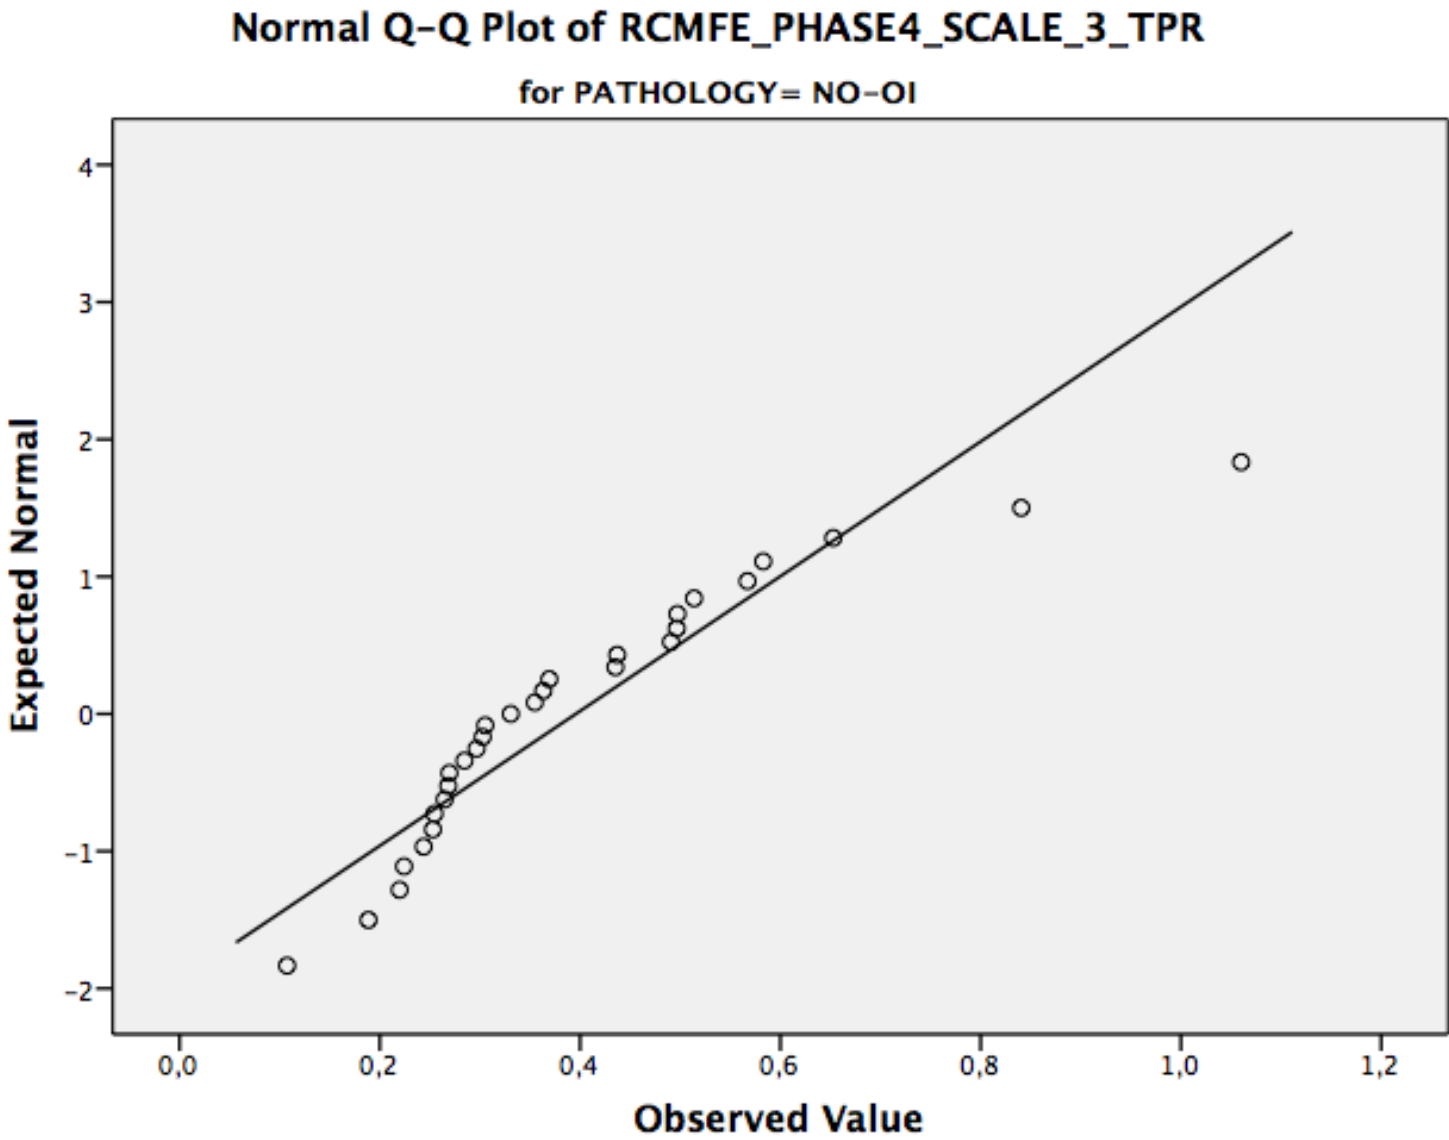

# Normal Q-Q Plot of RCMFE\_PHASE4\_SCALE\_3\_TPR

for PATHOLOGY= OI

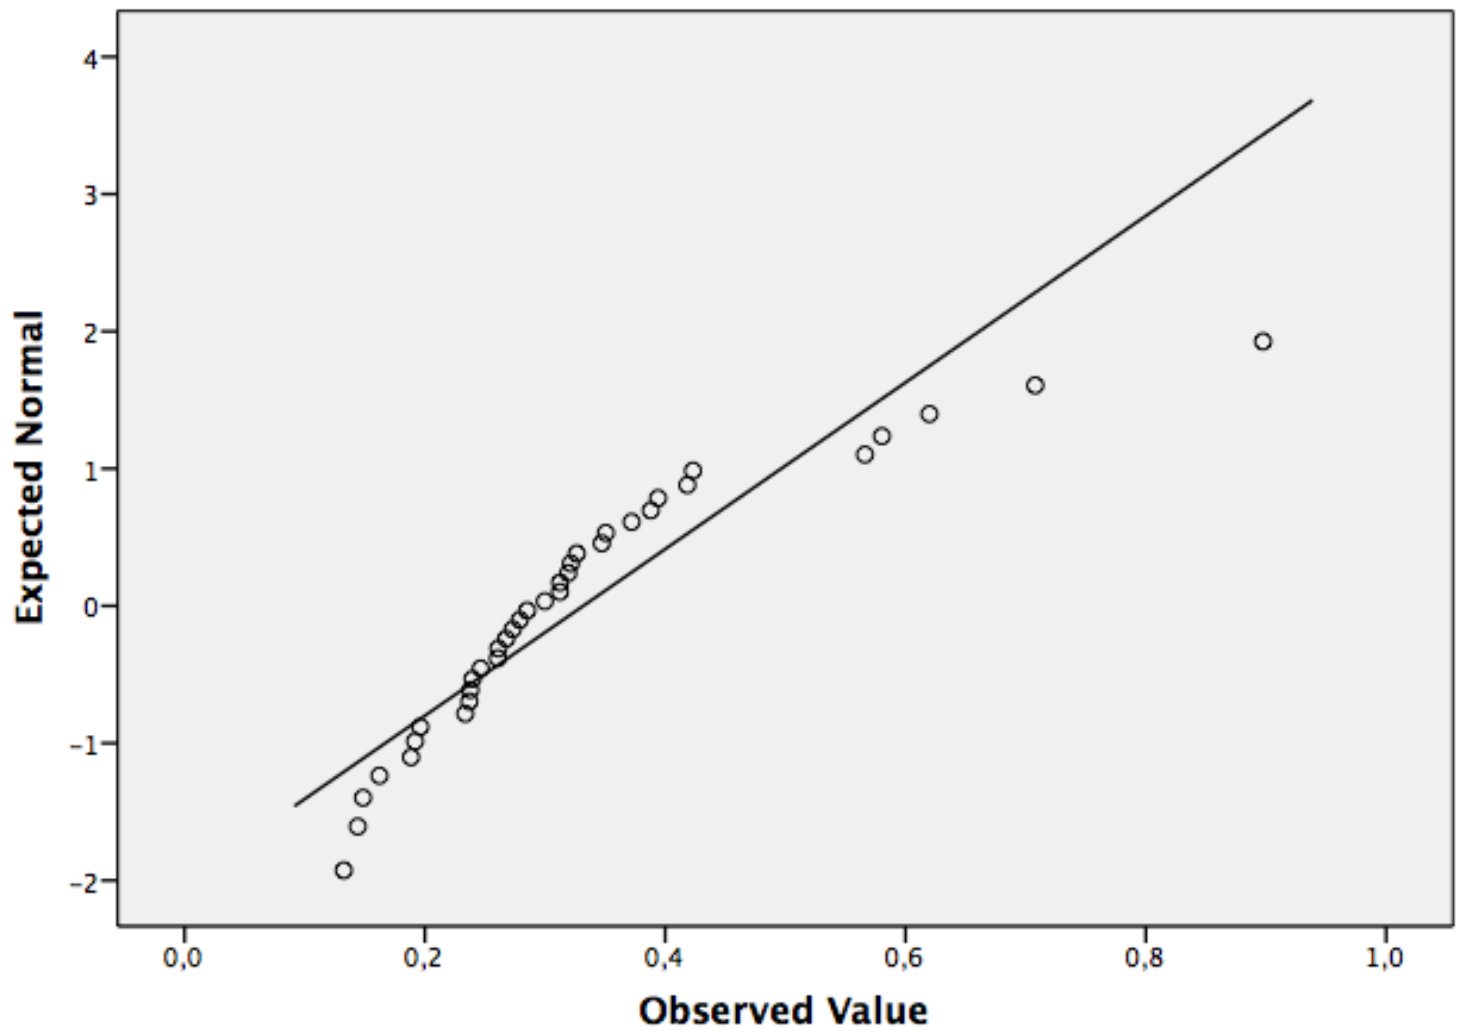

Normal Q-Q Plots

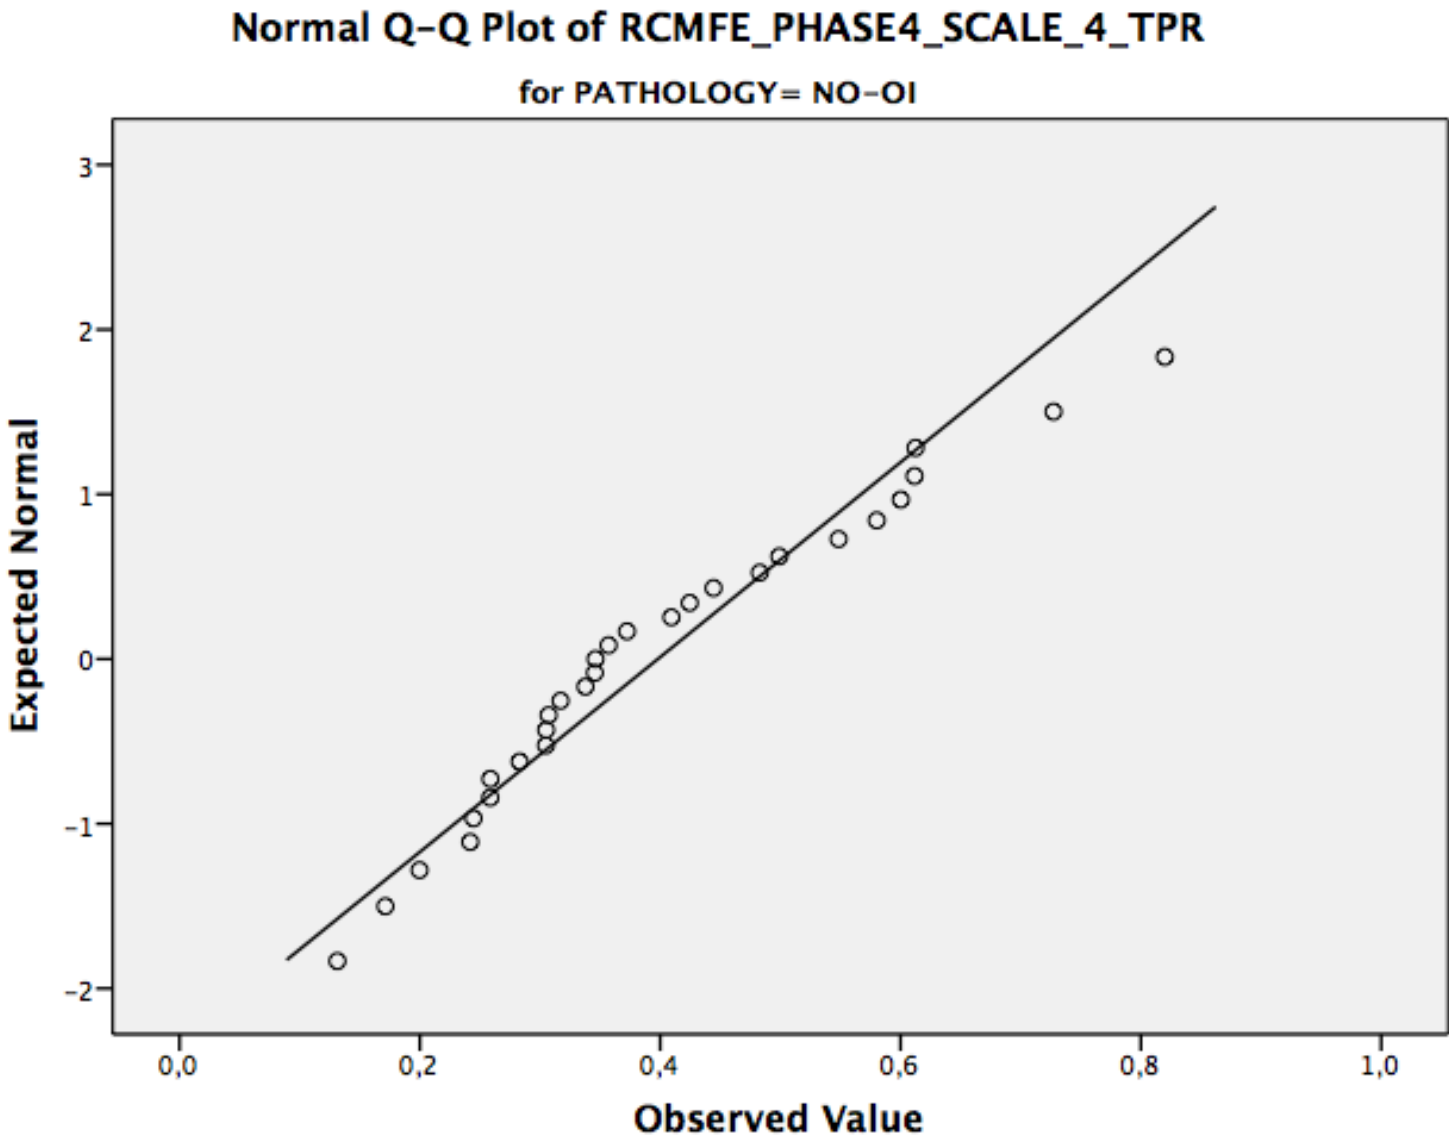

# Normal Q-Q Plot of RCMFE\_PHASE4\_SCALE\_4\_TPR

for PATHOLOGY= OI

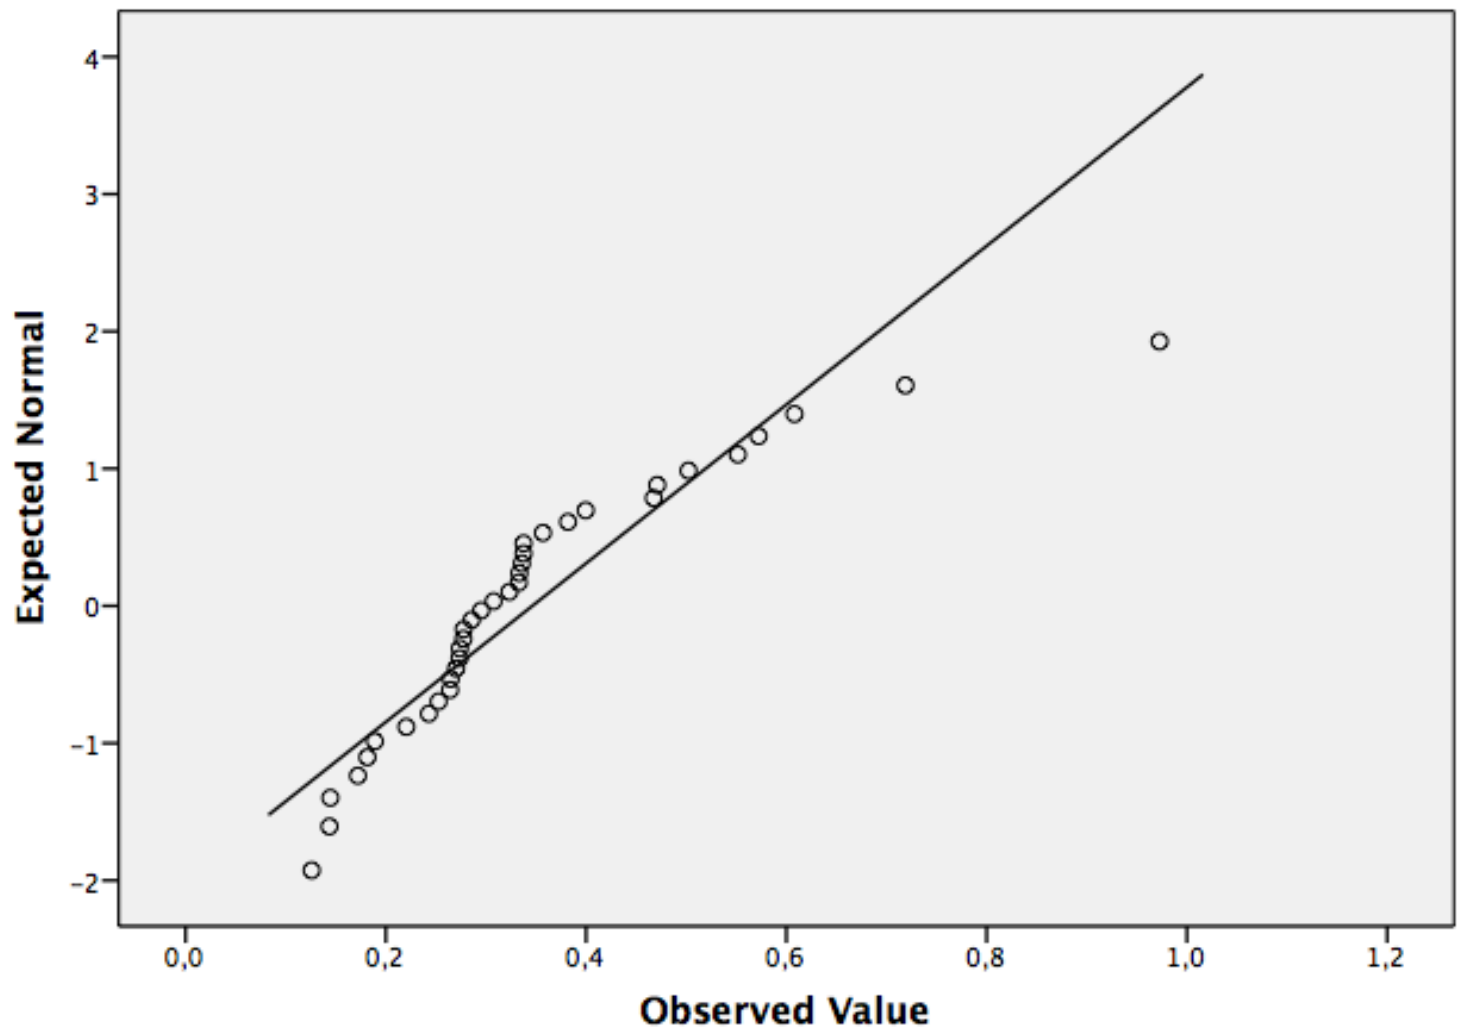

Normal Q-Q Plots

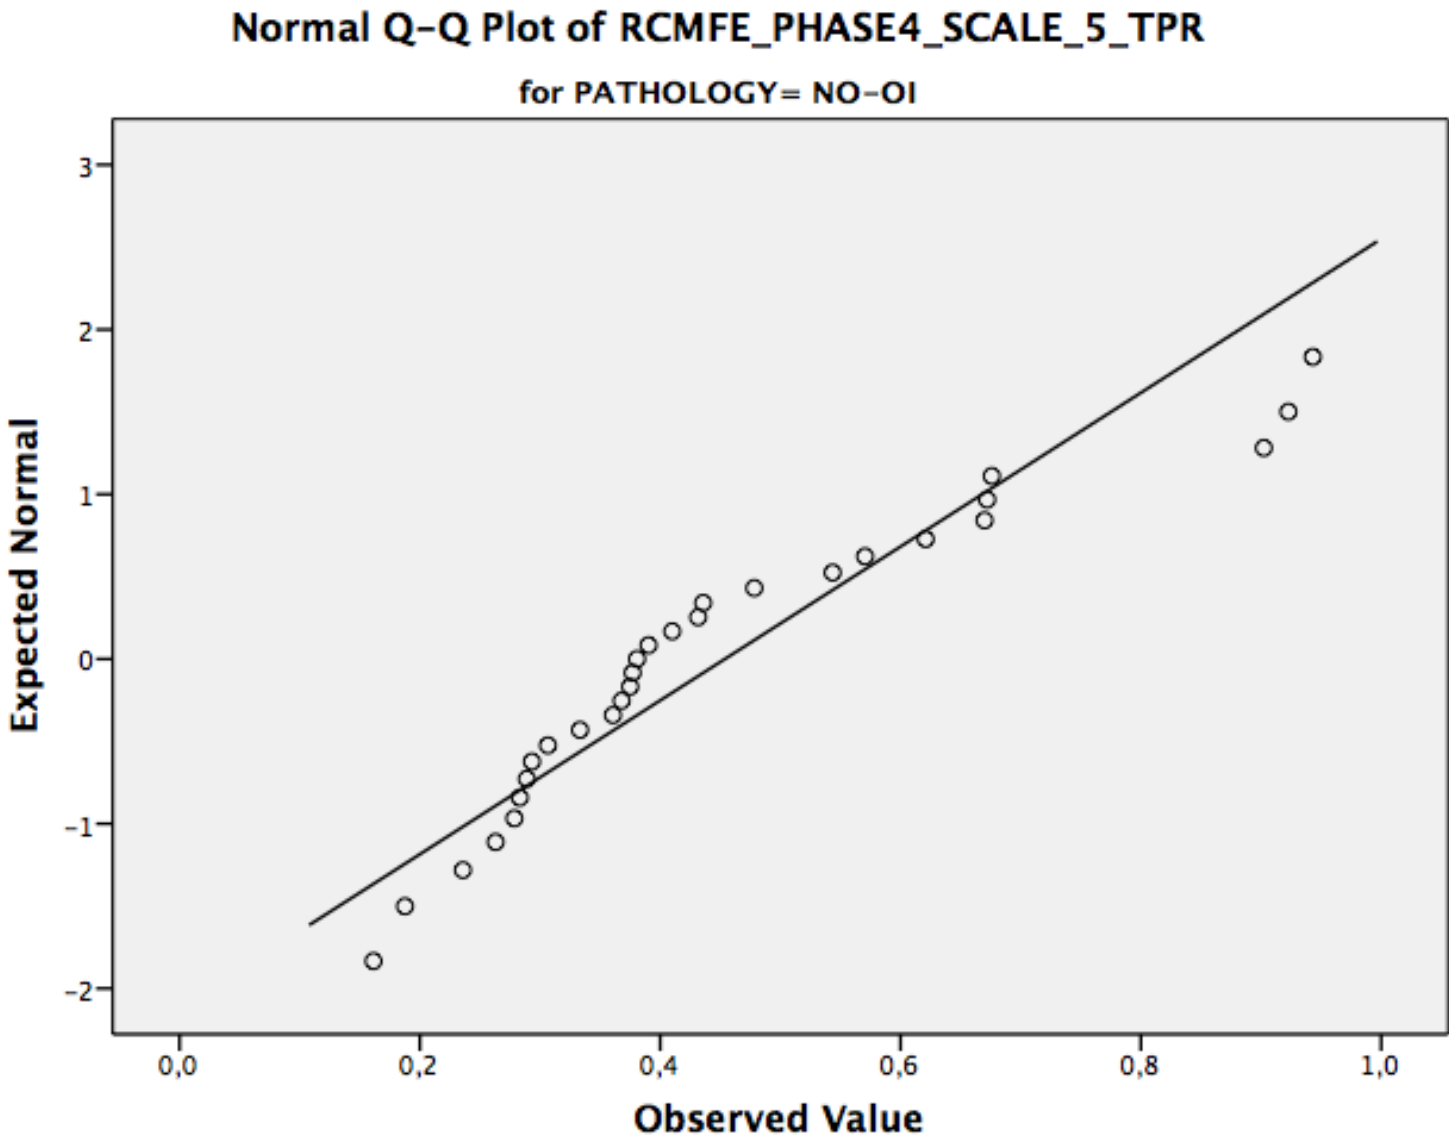

# Normal Q-Q Plot of RCMFE\_PHASE4\_SCALE\_5\_TPR

for PATHOLOGY= OI

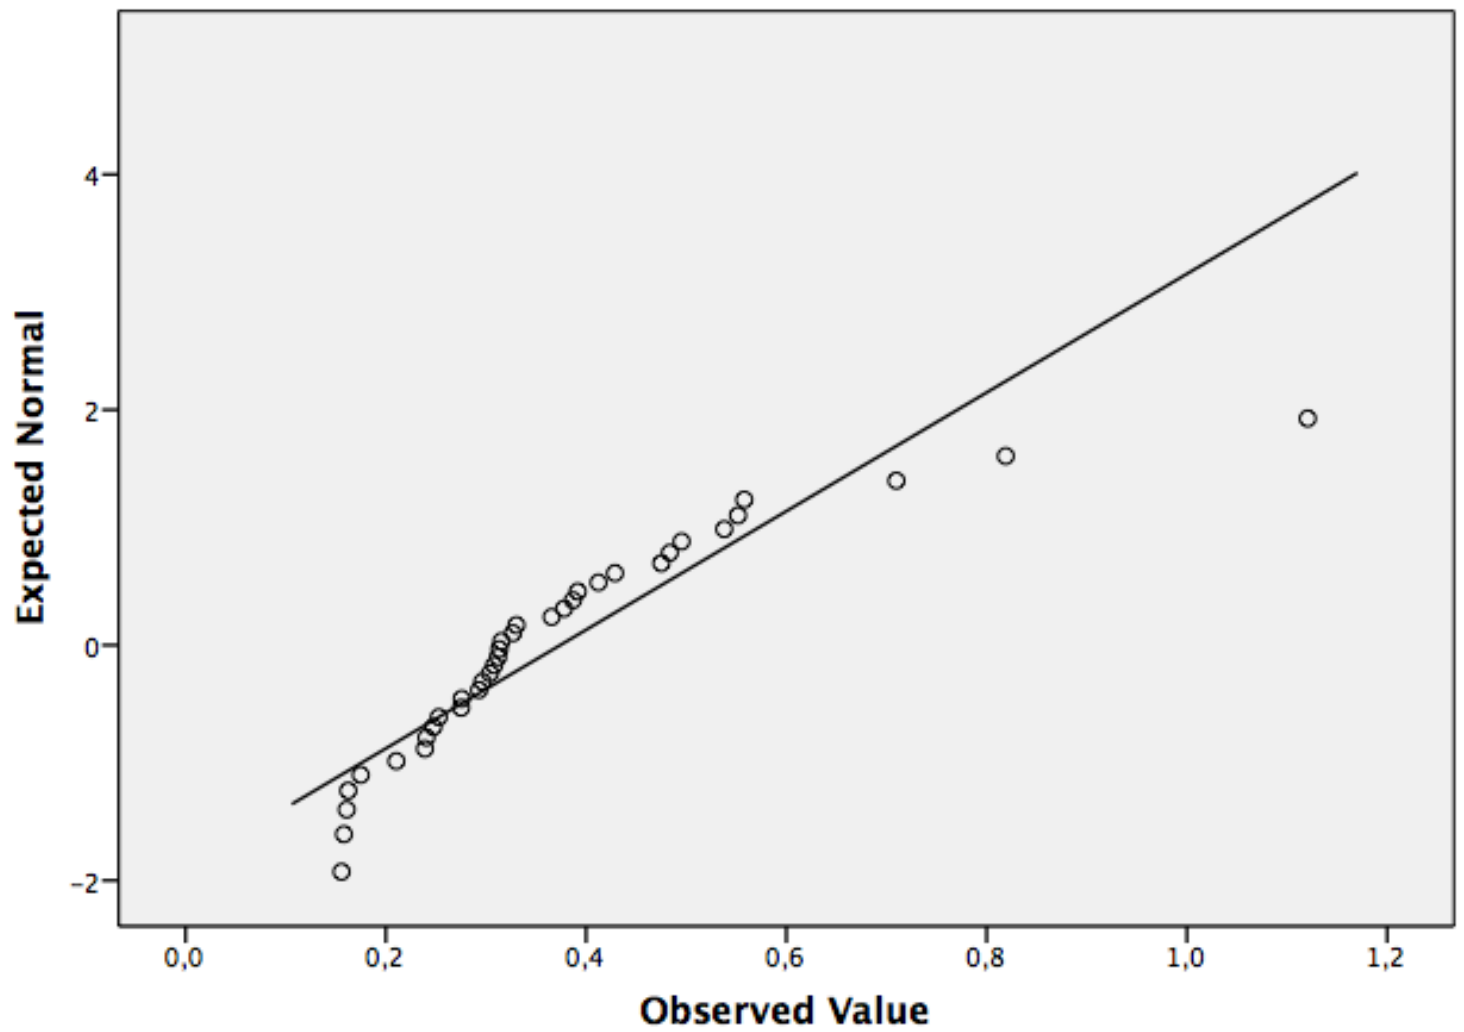



Normal Q-Q Plots

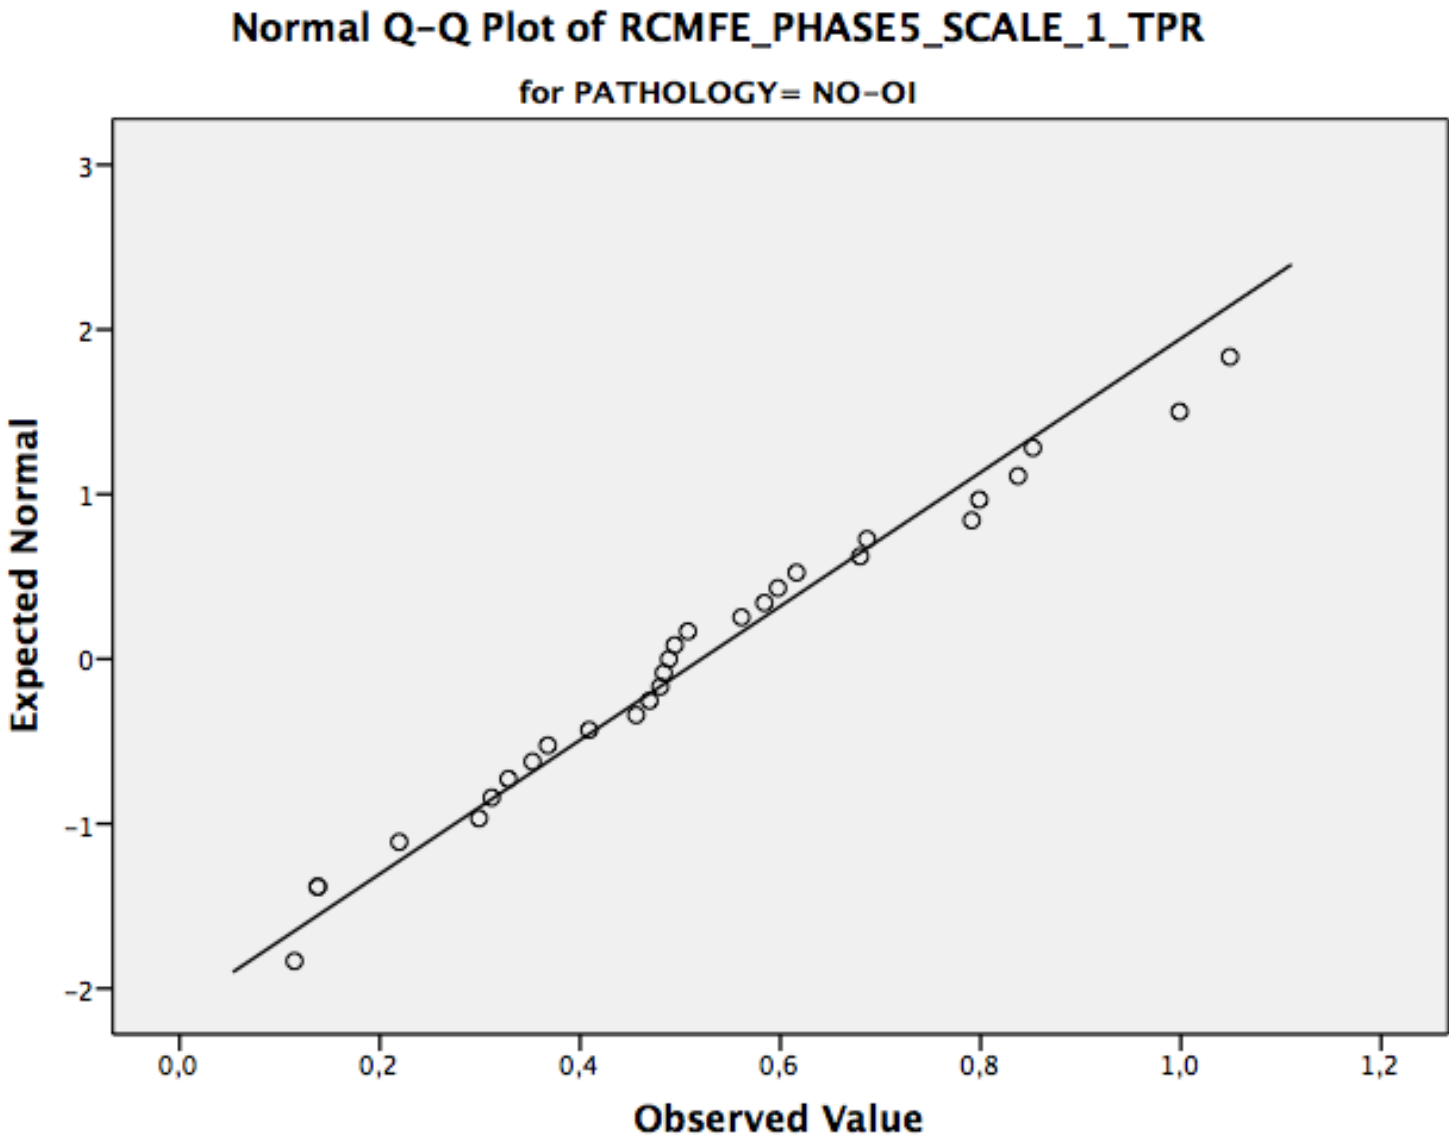

# Normal Q-Q Plot of RCMFE\_PHASE5\_SCALE\_1\_TPR

for PATHOLOGY= OI

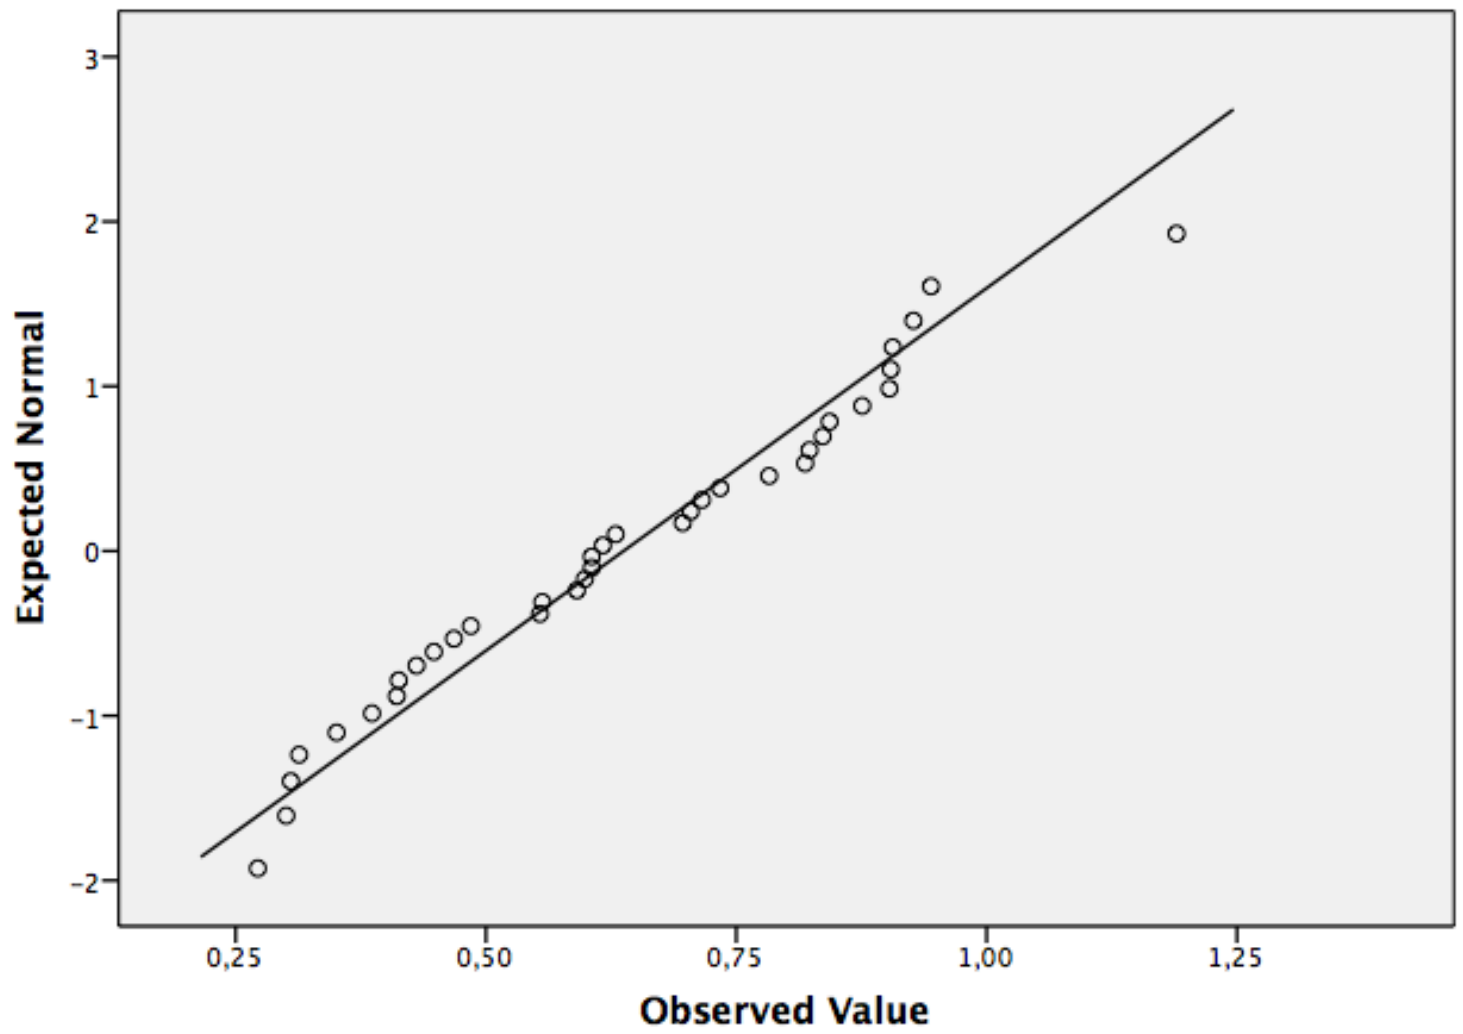

Normal Q-Q Plots

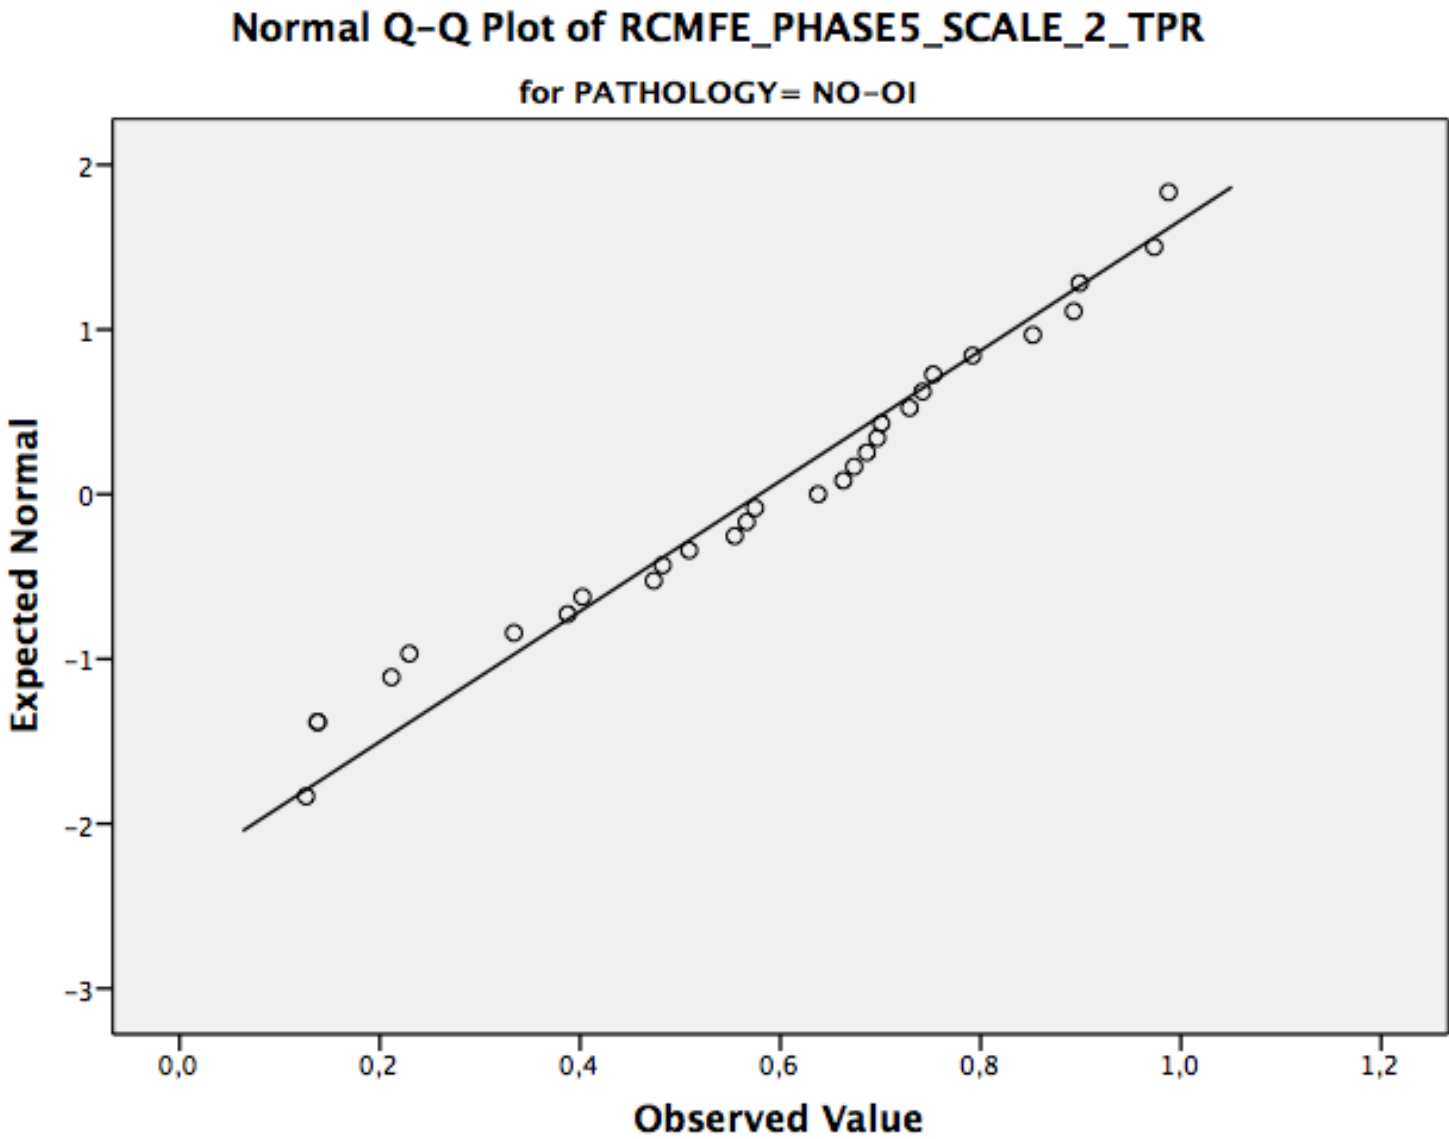

# Normal Q-Q Plot of RCMFE\_PHASE5\_SCALE\_2\_TPR

for PATHOLOGY= OI

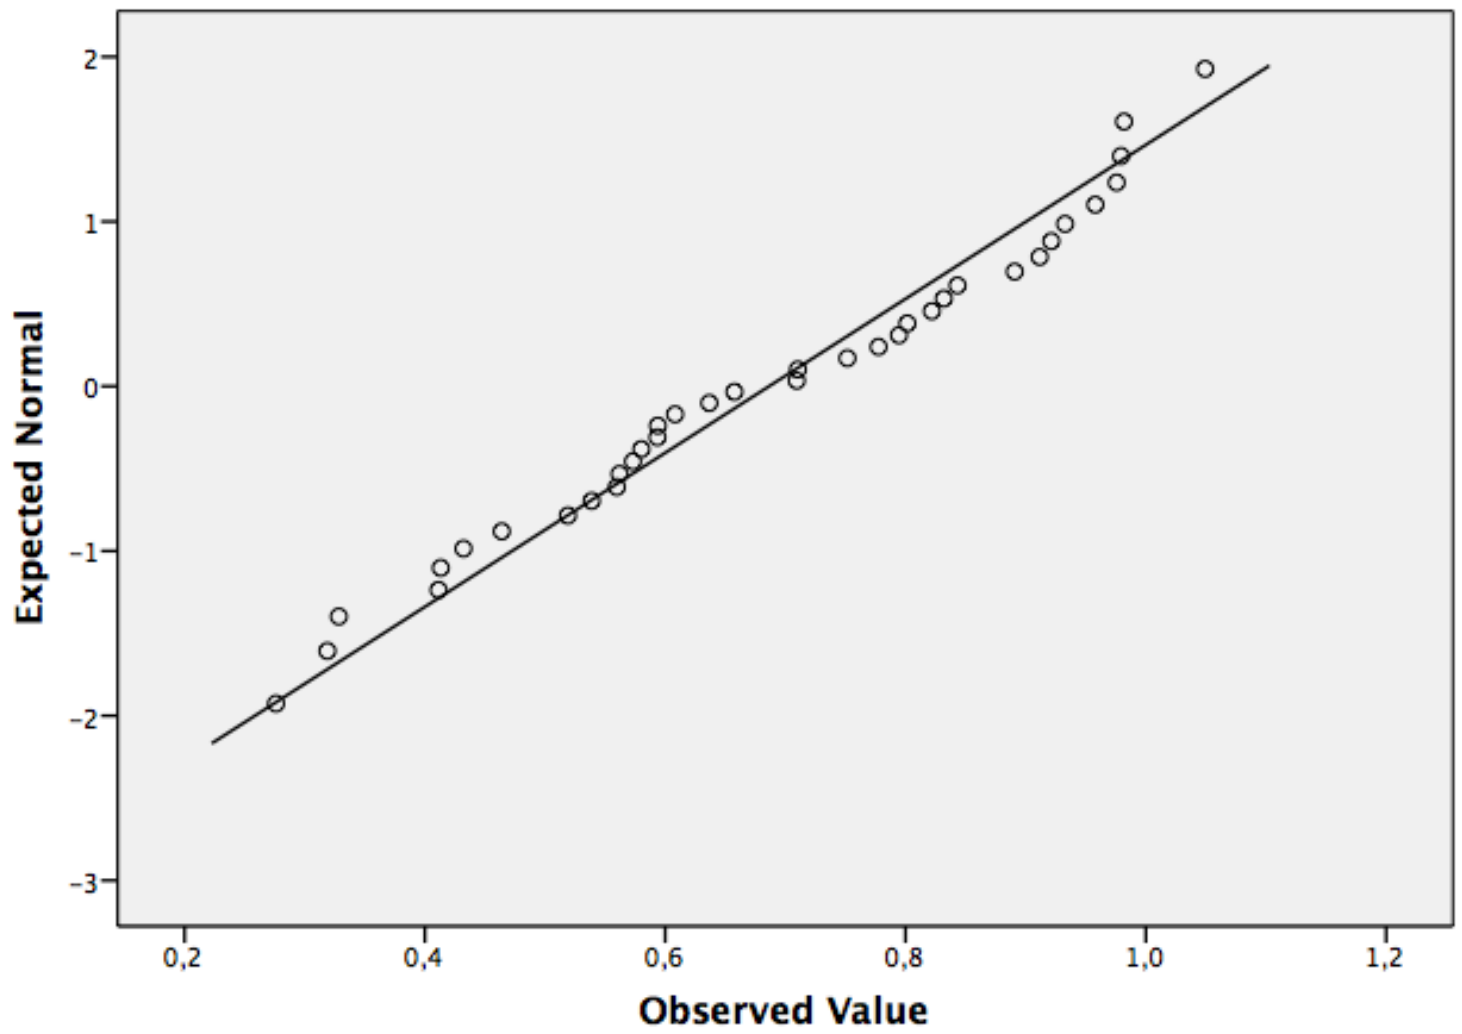

Normal Q-Q Plots

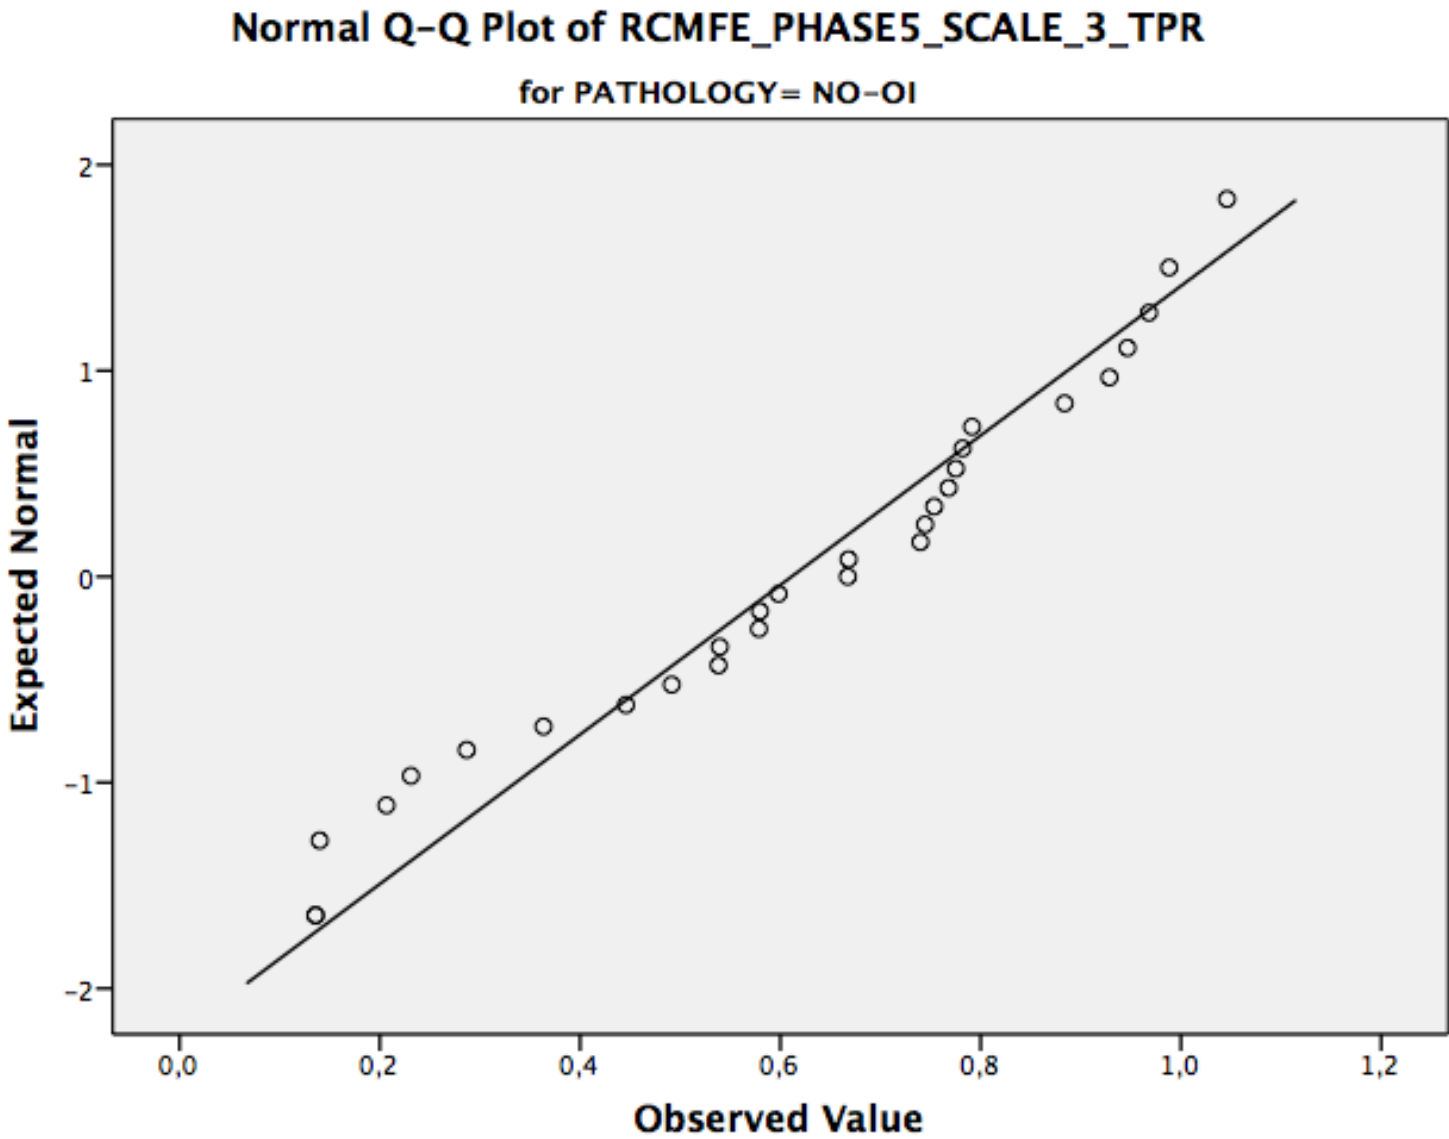

# Normal Q-Q Plot of RCMFE\_PHASE5\_SCALE\_3\_TPR

for PATHOLOGY= OI

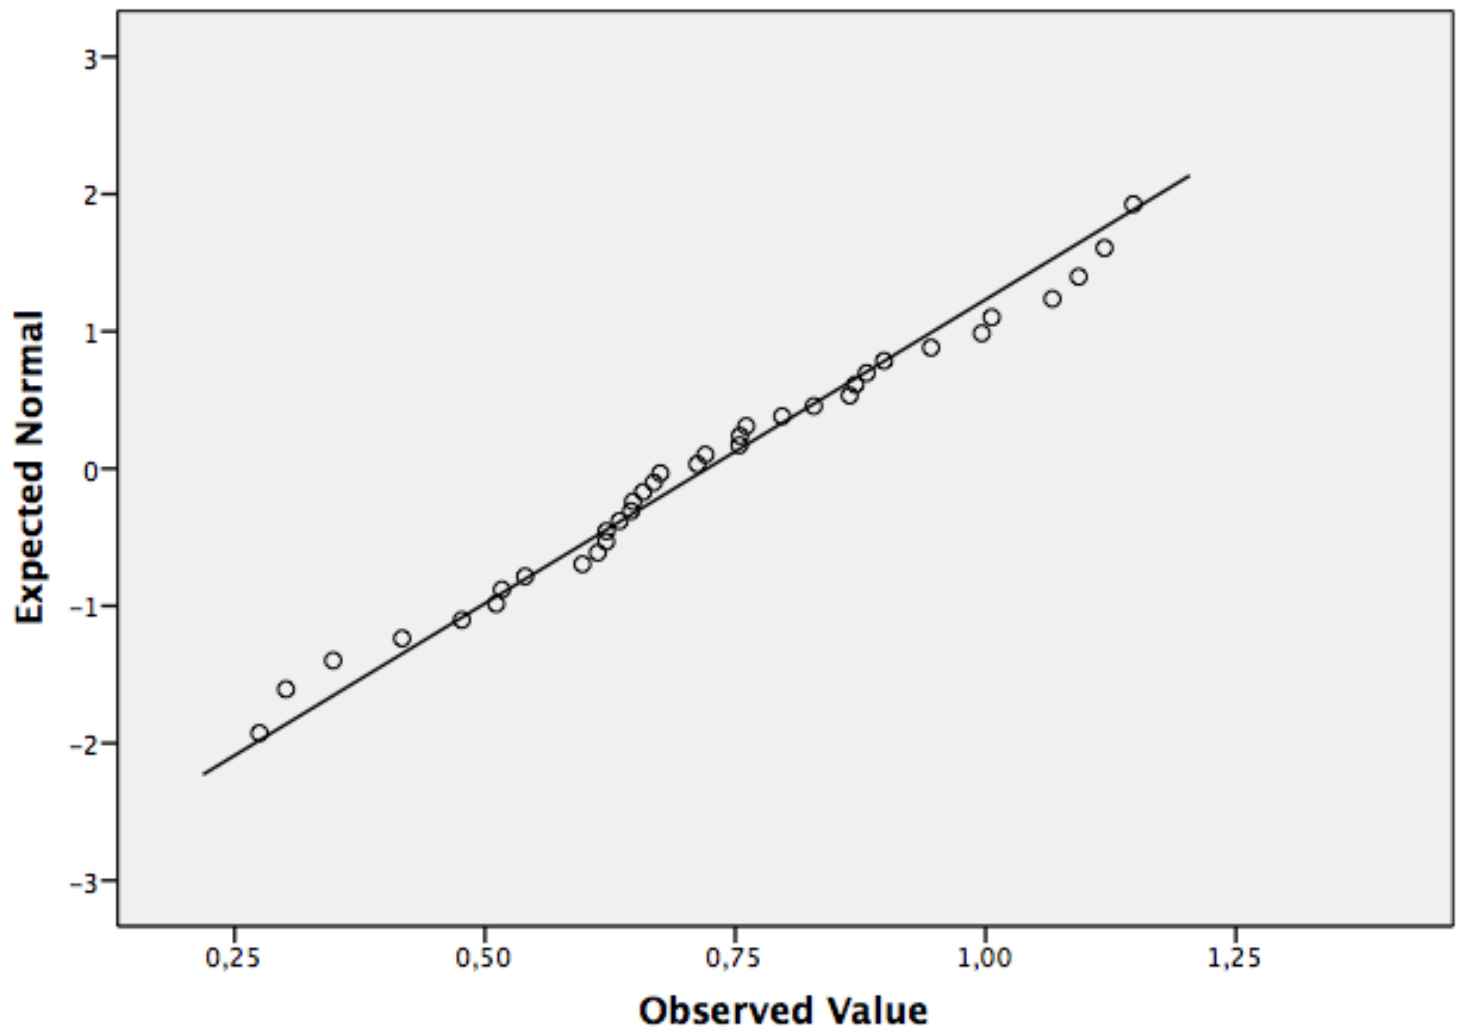

Normal Q-Q Plots

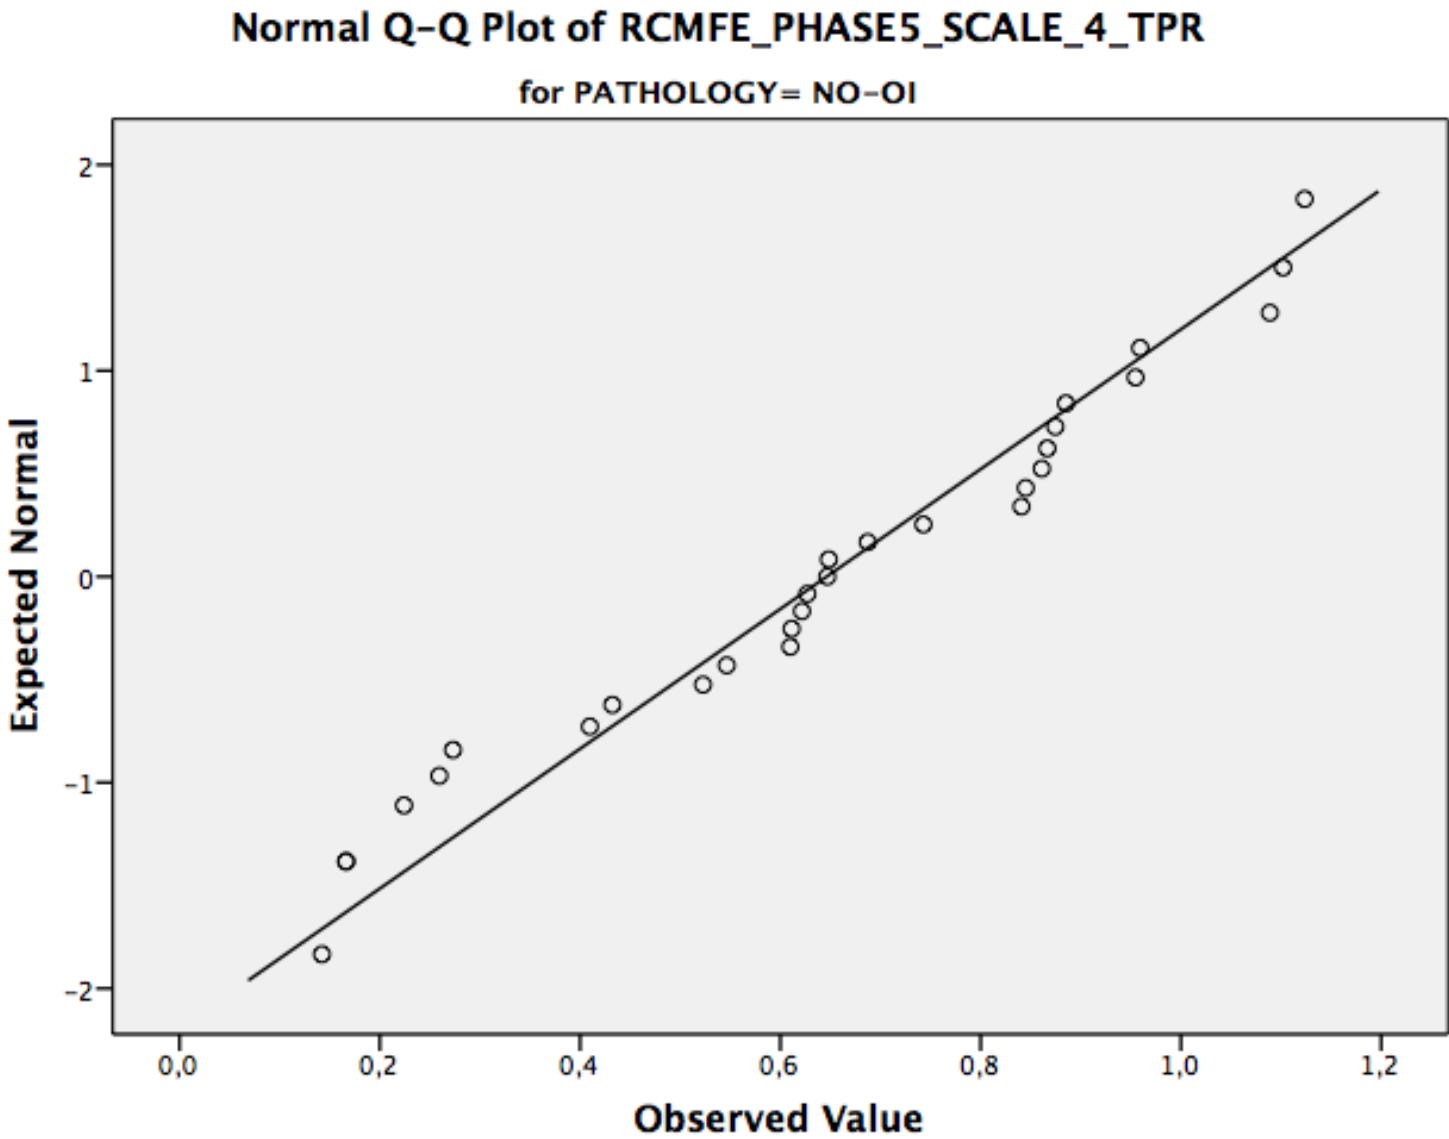

# Normal Q-Q Plot of RCMFE\_PHASE5\_SCALE\_4\_TPR

for PATHOLOGY= OI

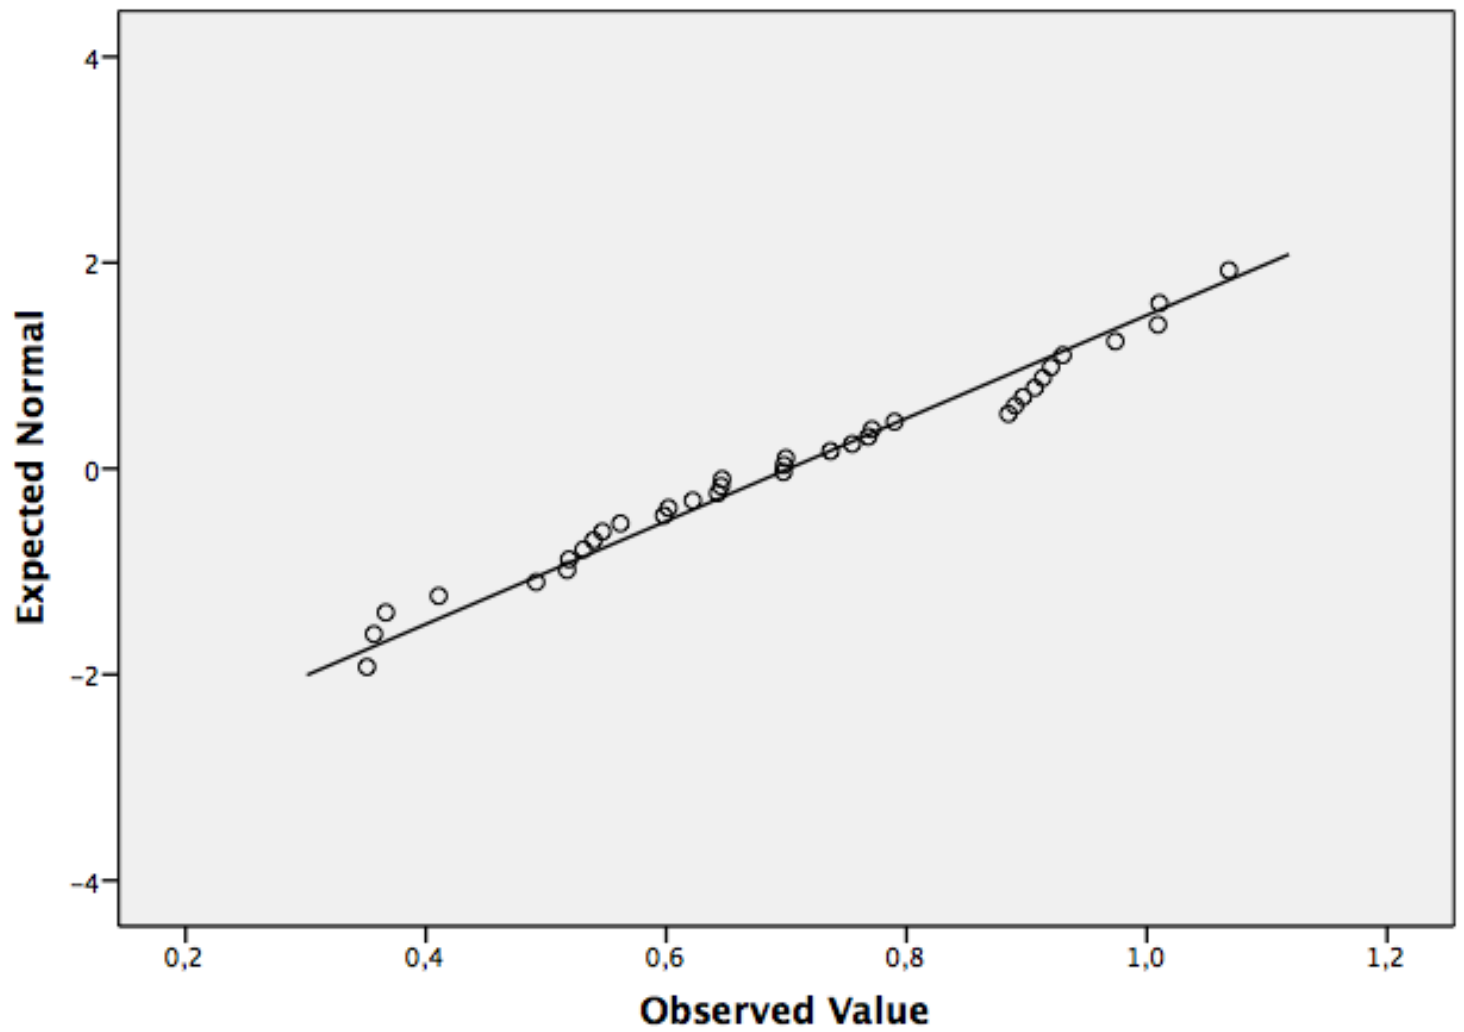



Normal Q-Q Plots

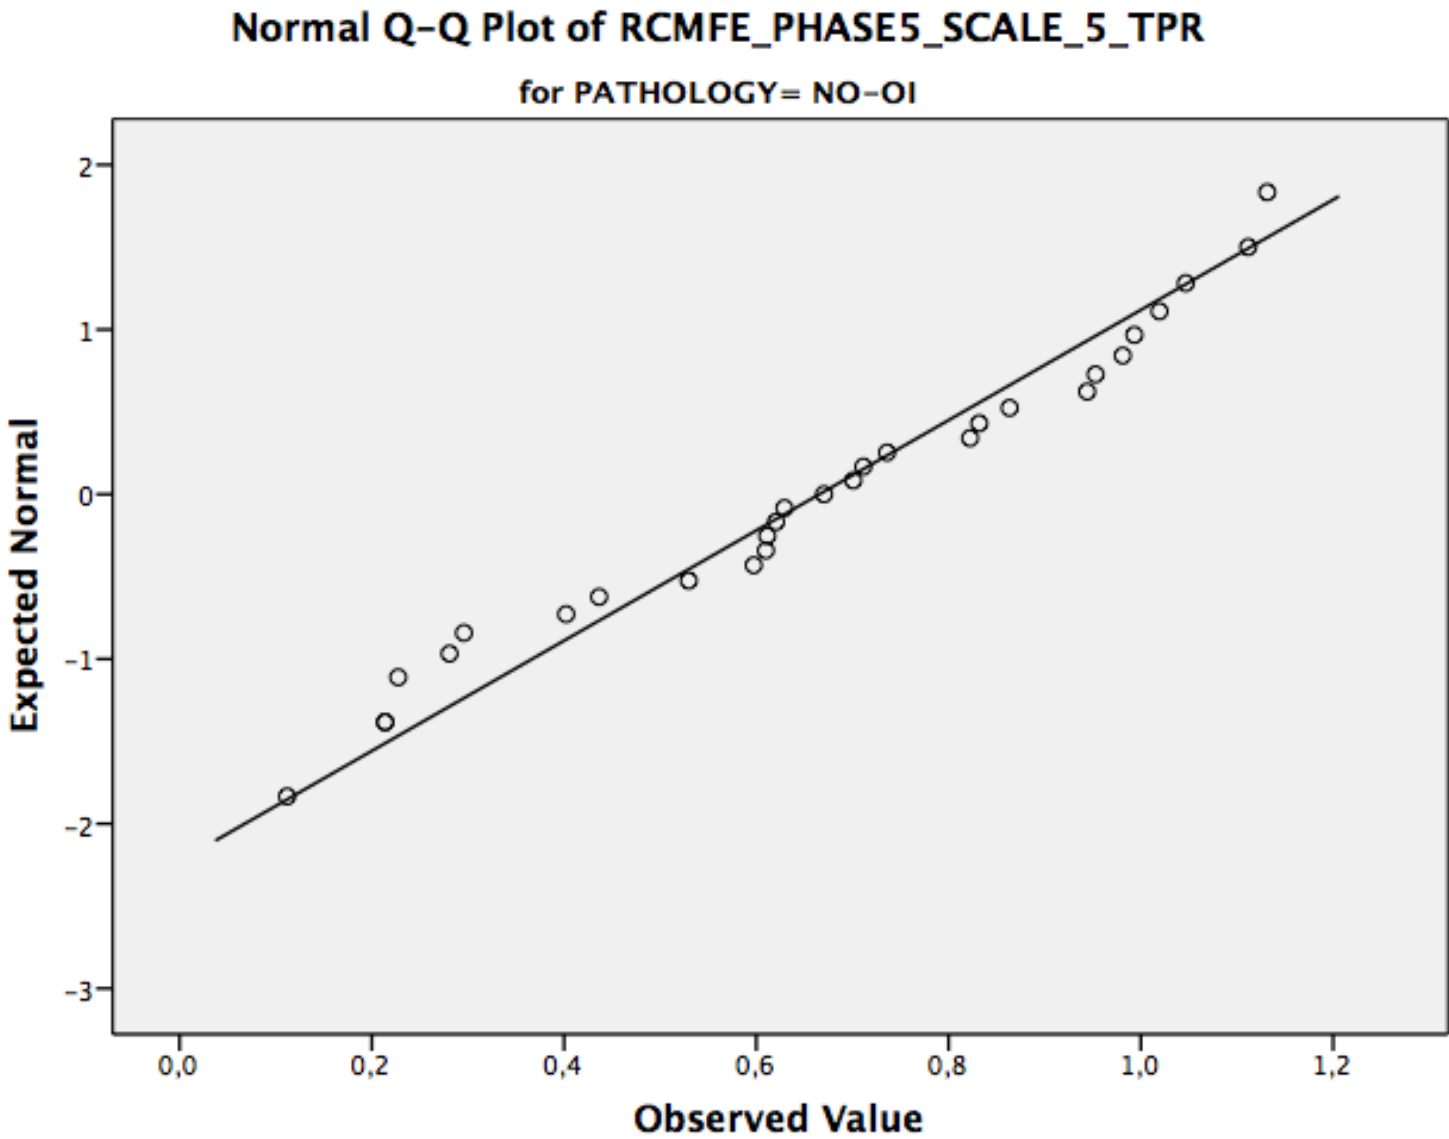

# Normal Q-Q Plot of RCMFE\_PHASE5\_SCALE\_5\_TPR

for PATHOLOGY= OI

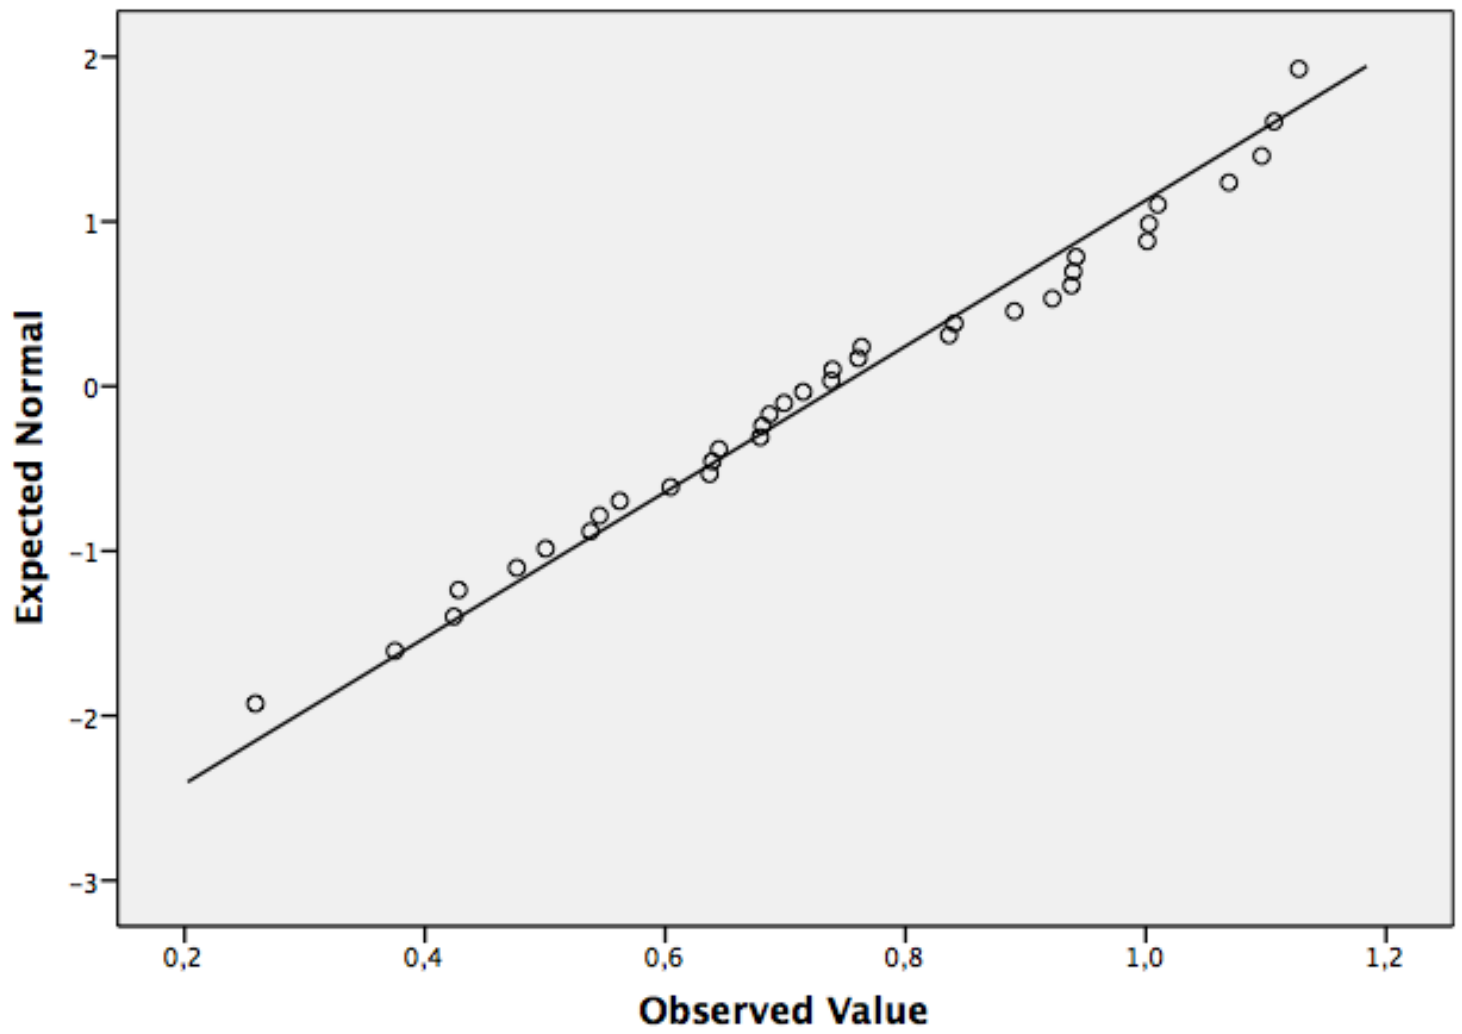

GENDER

Case Processing Summary

| GENDER                |       | Cases |         |         |         |       |         |
|-----------------------|-------|-------|---------|---------|---------|-------|---------|
|                       |       | Valid |         | Missing |         | Total |         |
|                       |       | N     | Percent | N       | Percent | N     | Percent |
| RCMFE_PHASE1_SCALE_1_ | WOMEN | 42    | 100,0%  | 0       | 0,0%    | 42    | 100,0%  |
| HR                    | MEN   | 23    | 100,0%  | 0       | 0,0%    | 23    | 100,0%  |
| RCMFE_PHASE1_SCALE_2_ | WOMEN | 42    | 100,0%  | 0       | 0,0%    | 42    | 100,0%  |
| HR                    | MEN   | 23    | 100,0%  | 0       | 0,0%    | 23    | 100,0%  |
| RCMFE_PHASE1_SCALE_3_ | WOMEN | 42    | 100,0%  | 0       | 0,0%    | 42    | 100,0%  |
| HR                    | MEN   | 23    | 100,0%  | 0       | 0,0%    | 23    | 100,0%  |
| RCMFE_PHASE1_SCALE_4_ | WOMEN | 42    | 100,0%  | 0       | 0,0%    | 42    | 100,0%  |
| HR                    | MEN   | 23    | 100,0%  | 0       | 0,0%    | 23    | 100,0%  |
| RCMFE_PHASE1_SCALE_5_ | WOMEN | 42    | 100,0%  | 0       | 0,0%    | 42    | 100,0%  |
| HR                    | MEN   | 23    | 100,0%  | 0       | 0,0%    | 23    | 100,0%  |
| RCMFE_PHASE2_SCALE_1_ | WOMEN | 42    | 100,0%  | 0       | 0,0%    | 42    | 100,0%  |
| HR                    | MEN   | 23    | 100,0%  | 0       | 0,0%    | 23    | 100,0%  |
| RCMFE_PHASE2_SCALE_2_ | WOMEN | 42    | 100,0%  | 0       | 0,0%    | 42    | 100,0%  |
| HR                    | MEN   | 23    | 100,0%  | 0       | 0,0%    | 23    | 100,0%  |
| RCMFE_PHASE2_SCALE_3_ | WOMEN | 42    | 100,0%  | 0       | 0,0%    | 42    | 100,0%  |
| HR                    | MEN   | 23    | 100,0%  | 0       | 0,0%    | 23    | 100,0%  |
| RCMFE_PHASE2_SCALE_4_ | WOMEN | 42    | 100,0%  | 0       | 0,0%    | 42    | 100,0%  |
| HR                    | MEN   | 23    | 100,0%  | 0       | 0,0%    | 23    | 100,0%  |
| RCMFE_PHASE2_SCALE_5_ | WOMEN | 42    | 100,0%  | 0       | 0,0%    | 42    | 100,0%  |
| HR                    | MEN   | 23    | 100,0%  | 0       | 0,0%    | 23    | 100,0%  |
| RCMFE_PHASE3_SCALE_1_ | WOMEN | 42    | 100,0%  | 0       | 0,0%    | 42    | 100,0%  |
| HR                    | MEN   | 23    | 100,0%  | 0       | 0,0%    | 23    | 100,0%  |
| RCMFE_PHASE3_SCALE_2_ | WOMEN | 42    | 100,0%  | 0       | 0,0%    | 42    | 100,0%  |
| HR                    | MEN   | 23    | 100,0%  | 0       | 0,0%    | 23    | 100,0%  |
| RCMFE_PHASE3_SCALE_3_ | WOMEN | 42    | 100,0%  | 0       | 0,0%    | 42    | 100,0%  |
| HR                    | MEN   | 23    | 100,0%  | 0       | 0,0%    | 23    | 100,0%  |
| RCMFE_PHASE3_SCALE_4_ | WOMEN | 42    | 100,0%  | 0       | 0,0%    | 42    | 100,0%  |
| HR                    | MEN   | 23    | 100,0%  | 0       | 0,0%    | 23    | 100,0%  |
| RCMFE_PHASE3_SCALE_5_ | WOMEN | 42    | 100,0%  | 0       | 0,0%    | 42    | 100,0%  |
| HR                    | MEN   | 23    | 100,0%  | 0       | 0,0%    | 23    | 100,0%  |
| RCMFE_PHASE4_SCALE_1_ | WOMEN | 42    | 100,0%  | 0       | 0,0%    | 42    | 100,0%  |
| HR                    | MEN   | 23    | 100,0%  | 0       | 0,0%    | 23    | 100,0%  |
| RCMFE_PHASE4_SCALE_2_ | WOMEN | 42    | 100,0%  | 0       | 0,0%    | 42    | 100,0%  |
| HR                    | MEN   | 23    | 100,0%  | 0       | 0,0%    | 23    | 100,0%  |
| RCMFE_PHASE4_SCALE_3_ | WOMEN | 42    | 100,0%  | 0       | 0,0%    | 42    | 100,0%  |
| HR                    | MEN   | 23    | 100,0%  | 0       | 0,0%    | 23    | 100,0%  |
| RCMFE_PHASE4_SCALE_4_ | WOMEN | 42    | 100,0%  | 0       | 0,0%    | 42    | 100,0%  |
| HR                    | MEN   | 23    | 100,0%  | 0       | 0,0%    | 23    | 100,0%  |
| RCMFE_PHASE4_SCALE_5_ | WOMEN | 42    | 100,0%  | 0       | 0,0%    | 42    | 100,0%  |
| HR                    | MEN   | 23    | 100,0%  | 0       | 0,0%    | 23    | 100,0%  |
| RCMFE_PHASE5_SCALE_1_ | WOMEN | 42    | 100,0%  | 0       | 0,0%    | 42    | 100,0%  |
| HR                    |       |       |         |         |         |       |         |

### Case Processing Summary

| GENDER                |       | Cases |         |         |         |       |         |
|-----------------------|-------|-------|---------|---------|---------|-------|---------|
|                       |       | Valid |         | Missing |         | Total |         |
|                       |       | N     | Percent | N       | Percent | N     | Percent |
| RCMFE_PHASE5_SCALE_1_ | MEN   | 23    | 100,0%  | 0       | 0,0%    | 23    | 100,0%  |
| HR                    |       |       |         |         |         |       |         |
| RCMFE_PHASE5_SCALE_2_ | WOMEN | 42    | 100,0%  | 0       | 0,0%    | 42    | 100,0%  |
| HR                    | MEN   | 23    | 100,0%  | 0       | 0,0%    | 23    | 100,0%  |
| RCMFE_PHASE5_SCALE_3_ | WOMEN | 42    | 100,0%  | 0       | 0,0%    | 42    | 100,0%  |
| HR                    | MEN   | 23    | 100,0%  | 0       | 0,0%    | 23    | 100,0%  |
| RCMFE_PHASE5_SCALE_4_ | WOMEN | 42    | 100,0%  | 0       | 0,0%    | 42    | 100,0%  |
| HR                    | MEN   | 23    | 100,0%  | 0       | 0,0%    | 23    | 100,0%  |
| RCMFE_PHASE5_SCALE_5_ | WOMEN | 42    | 100,0%  | 0       | 0,0%    | 42    | 100,0%  |
| HR                    | MEN   | 23    | 100,0%  | 0       | 0,0%    | 23    | 100,0%  |

### Tests of Normality

| GENDER                |       | Kolmogorov-Smirnov <sup>a</sup> |    |       | Shapiro-Wilk |    |      |
|-----------------------|-------|---------------------------------|----|-------|--------------|----|------|
|                       |       | Statistic                       | df | Sig.  | Statistic    | df | Sig. |
| RCMFE_PHASE1_SCALE_1_ | WOMEN | ,153                            | 42 | ,015  | ,975         | 42 | ,482 |
| HR                    | MEN   | ,159                            | 23 | ,135  | ,950         | 23 | ,299 |
| RCMFE_PHASE1_SCALE_2_ | WOMEN | ,067                            | 42 | ,200* | ,975         | 42 | ,471 |
| HR                    | MEN   | ,181                            | 23 | ,049  | ,921         | 23 | ,071 |
| RCMFE_PHASE1_SCALE_3_ | WOMEN | ,070                            | 42 | ,200* | ,989         | 42 | ,956 |
| HR                    | MEN   | ,163                            | 23 | ,118  | ,955         | 23 | ,369 |
| RCMFE_PHASE1_SCALE_4_ | WOMEN | ,068                            | 42 | ,200* | ,978         | 42 | ,592 |
| HR                    | MEN   | ,096                            | 23 | ,200* | ,975         | 23 | ,810 |
| RCMFE_PHASE1_SCALE_5_ | WOMEN | ,114                            | 42 | ,199  | ,973         | 42 | ,407 |
| HR                    | MEN   | ,129                            | 23 | ,200* | ,942         | 23 | ,194 |
| RCMFE_PHASE2_SCALE_1_ | WOMEN | ,119                            | 42 | ,150  | ,931         | 42 | ,054 |
| HR                    | MEN   | ,168                            | 23 | ,092  | ,897         | 23 | ,062 |
| RCMFE_PHASE2_SCALE_2_ | WOMEN | ,144                            | 42 | ,029  | ,872         | 42 | ,065 |
| HR                    | MEN   | ,206                            | 23 | ,012  | ,871         | 23 | ,077 |
| RCMFE_PHASE2_SCALE_3_ | WOMEN | ,158                            | 42 | ,010  | ,841         | 42 | ,079 |
| HR                    | MEN   | ,208                            | 23 | ,071  | ,884         | 23 | ,012 |
| RCMFE_PHASE2_SCALE_4_ | WOMEN | ,173                            | 42 | ,003  | ,830         | 42 | ,066 |
| HR                    | MEN   | ,190                            | 23 | ,031  | ,901         | 23 | ,057 |
| RCMFE_PHASE2_SCALE_5_ | WOMEN | ,166                            | 42 | ,005  | ,788         | 42 | ,050 |
| HR                    | MEN   | ,150                            | 23 | ,195  | ,916         | 23 | ,054 |
| RCMFE_PHASE3_SCALE_1_ | WOMEN | ,121                            | 42 | ,132  | ,956         | 42 | ,102 |
| HR                    | MEN   | ,155                            | 23 | ,161  | ,924         | 23 | ,083 |
| RCMFE_PHASE3_SCALE_2_ | WOMEN | ,094                            | 42 | ,200* | ,960         | 42 | ,148 |
| HR                    | MEN   | ,081                            | 23 | ,200* | ,979         | 23 | ,880 |
| RCMFE_PHASE3_SCALE_3_ | WOMEN | ,062                            | 42 | ,200* | ,987         | 42 | ,899 |
| HR                    | MEN   | ,084                            | 23 | ,200* | ,985         | 23 | ,968 |
| RCMFE_PHASE3_SCALE_4_ | WOMEN | ,087                            | 42 | ,200* | ,986         | 42 | ,871 |
| HR                    | MEN   | ,122                            | 23 | ,200* | ,939         | 23 | ,171 |
| RCMFE_PHASE3_SCALE_5_ | WOMEN | ,091                            | 42 | ,200* | ,967         | 42 | ,254 |

|                       |       |      |    |       |      |    |      |
|-----------------------|-------|------|----|-------|------|----|------|
| HR                    | MEN   | ,123 | 23 | ,200* | ,954 | 23 | ,347 |
| RCMFE_PHASE4_SCALE_1_ | WOMEN | ,154 | 42 | ,013  | ,900 | 42 | ,061 |
| HR                    | MEN   | ,090 | 23 | ,200* | ,945 | 23 | ,233 |
| RCMFE_PHASE4_SCALE_2_ | WOMEN | ,164 | 42 | ,006  | ,889 | 42 | ,067 |
| HR                    | MEN   | ,109 | 23 | ,200* | ,940 | 23 | ,179 |
| RCMFE_PHASE4_SCALE_3_ | WOMEN | ,157 | 42 | ,011  | ,848 | 42 | ,055 |
|                       | MEN   | ,160 | 23 | ,131  | ,936 | 23 | ,145 |
| RCMFE_PHASE4_SCALE_4_ | WOMEN | ,182 | 42 | ,001  | ,833 | 42 | ,054 |
| HR                    | MEN   | ,154 | 23 | ,167  | ,913 | 23 | ,047 |
| RCMFE_PHASE4_SCALE_5_ | WOMEN | ,183 | 42 | ,001  | ,788 | 42 | ,053 |
| HR                    | MEN   | ,179 | 23 | ,054  | ,917 | 23 | ,059 |
| RCMFE_PHASE5_SCALE_1_ | WOMEN | ,101 | 42 | ,200* | ,974 | 42 | ,439 |
| HR                    | MEN   | ,088 | 23 | ,200* | ,988 | 23 | ,990 |

#### Tests of Normality

| GENDER                      | Kolmogorov-Smirnov <sup>a</sup> |    |       | Shapiro-Wilk |    |      |
|-----------------------------|---------------------------------|----|-------|--------------|----|------|
|                             | Statistic                       | df | Sig.  | Statistic    | df | Sig. |
| RCMFE_PHASE5_SCALE_2_ WOMEN | ,079                            | 42 | ,200  | ,976         | 42 | ,500 |
| HR MEN                      | ,092                            | 23 | ,200  | ,979         | 23 | ,884 |
| RCMFE_PHASE5_SCALE_3_ WOMEN | ,104                            | 42 | ,200* | ,973         | 42 | ,412 |
| HR MEN                      | ,146                            | 23 | ,200  | ,974         | 23 | ,784 |
| RCMFE_PHASE5_SCALE_4_ WOMEN | ,126                            | 42 | ,090* | ,953         | 42 | ,084 |
| HR MEN                      | ,102                            | 23 | ,200  | ,973         | 23 | ,771 |
| RCMFE_PHASE5_SCALE_5_ WOMEN | ,087                            | 42 | ,200* | ,971         | 42 | ,354 |
| HR MEN                      | ,108                            | 23 | ,200* | ,967         | 23 | ,608 |

\*. This is a lower bound of the true significance.

a. Lilliefors Significance Correction

Normal Q-Q Plots

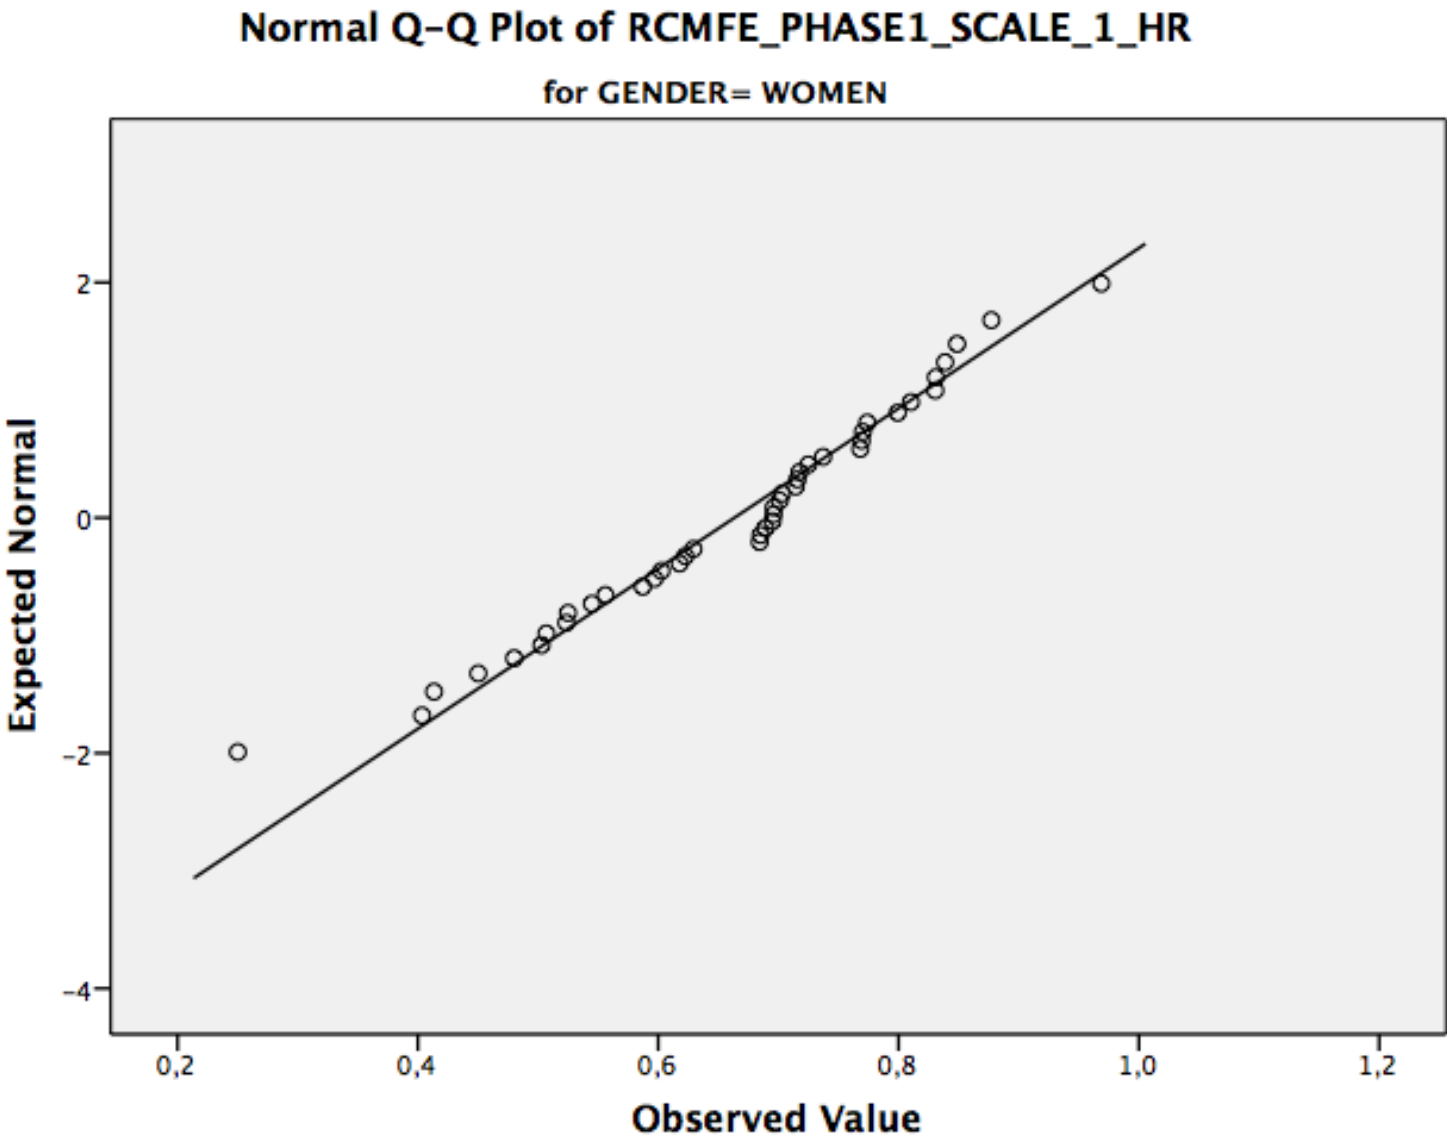

# Normal Q-Q Plot of RCMFE\_PHASE1\_SCALE\_1\_HR

for GENDER= MEN

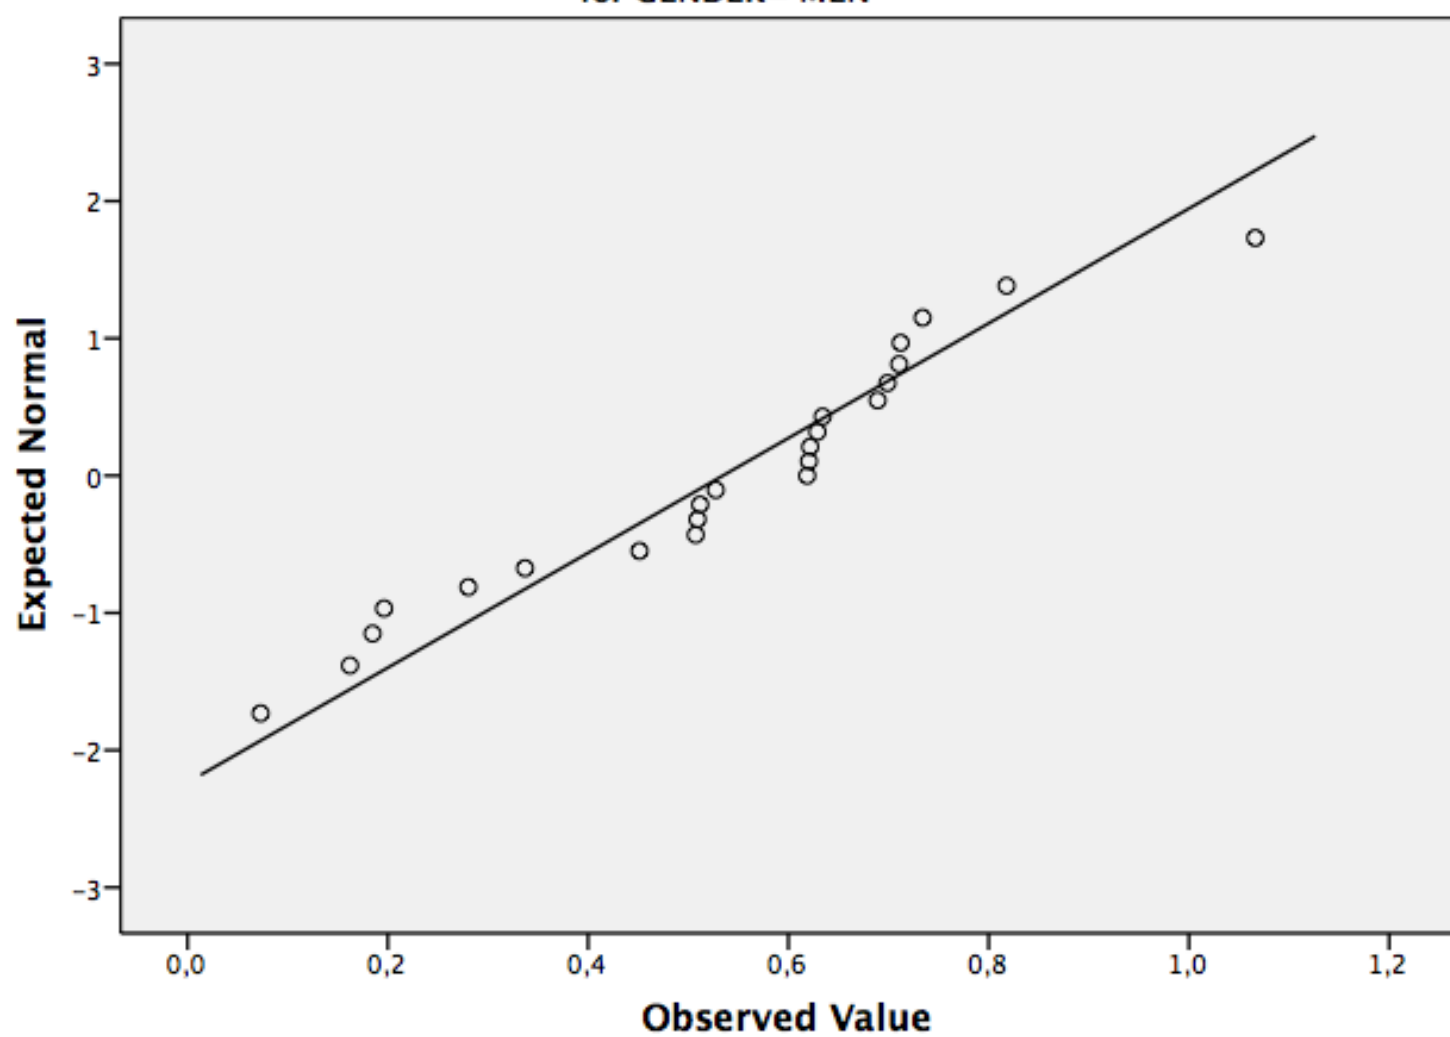

Normal Q-Q Plots

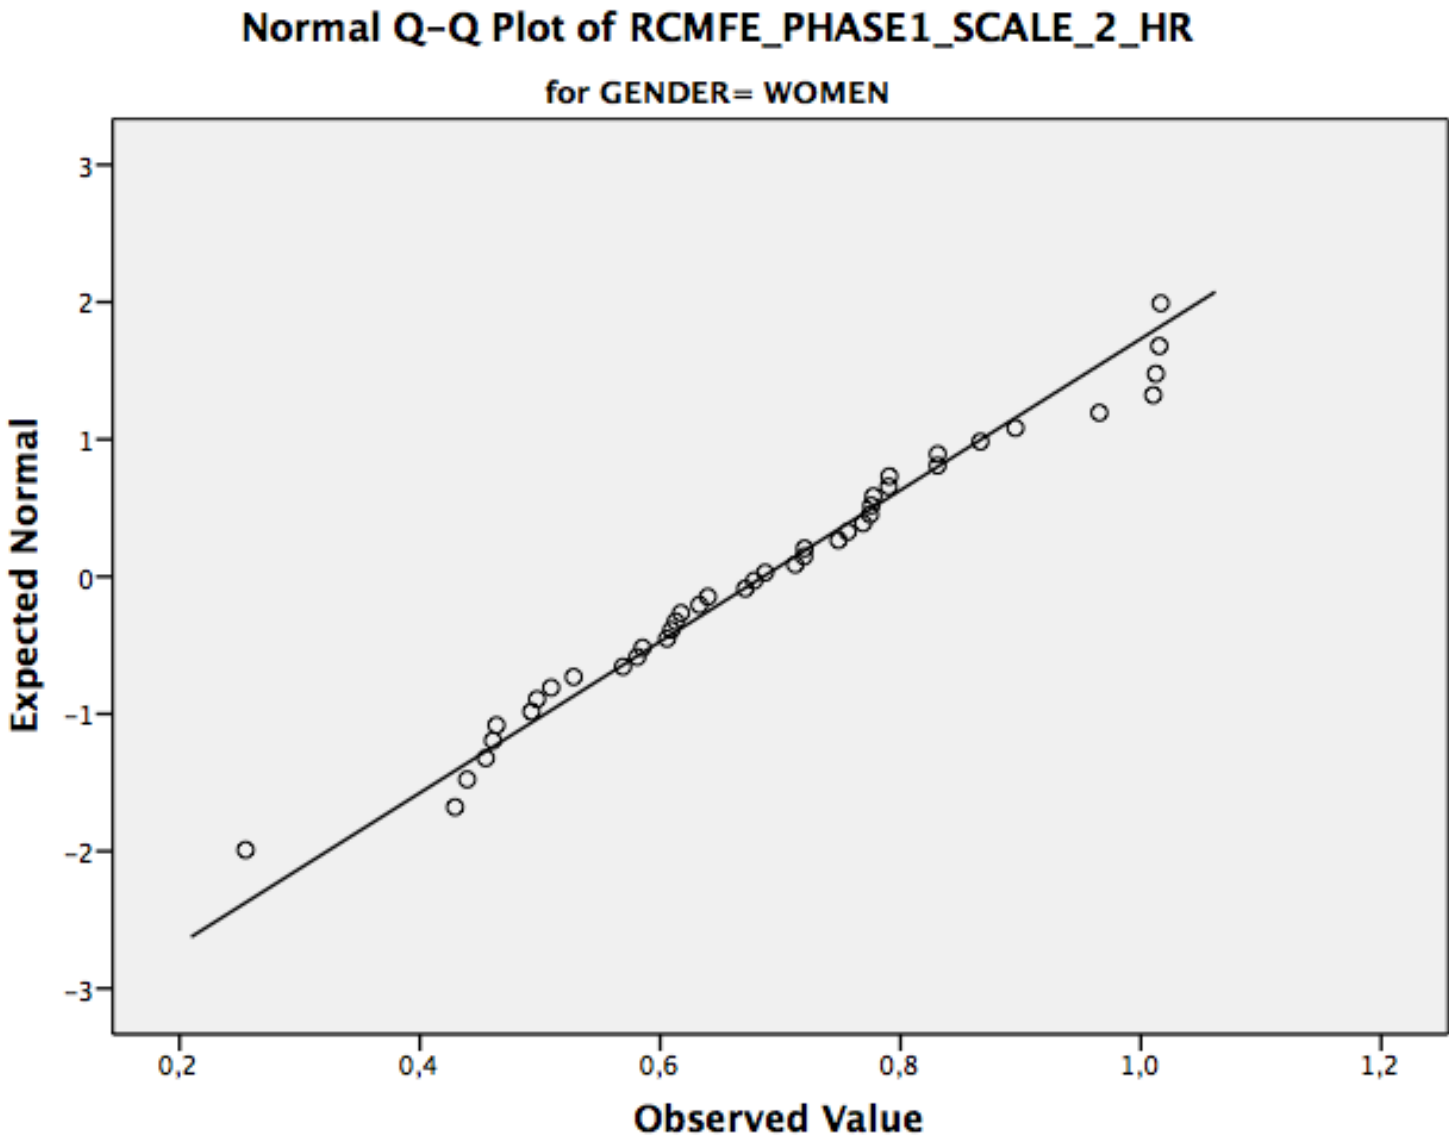



# Normal Q-Q Plot of RCMFE\_PHASE1\_SCALE\_2\_HR

for GENDER= MEN

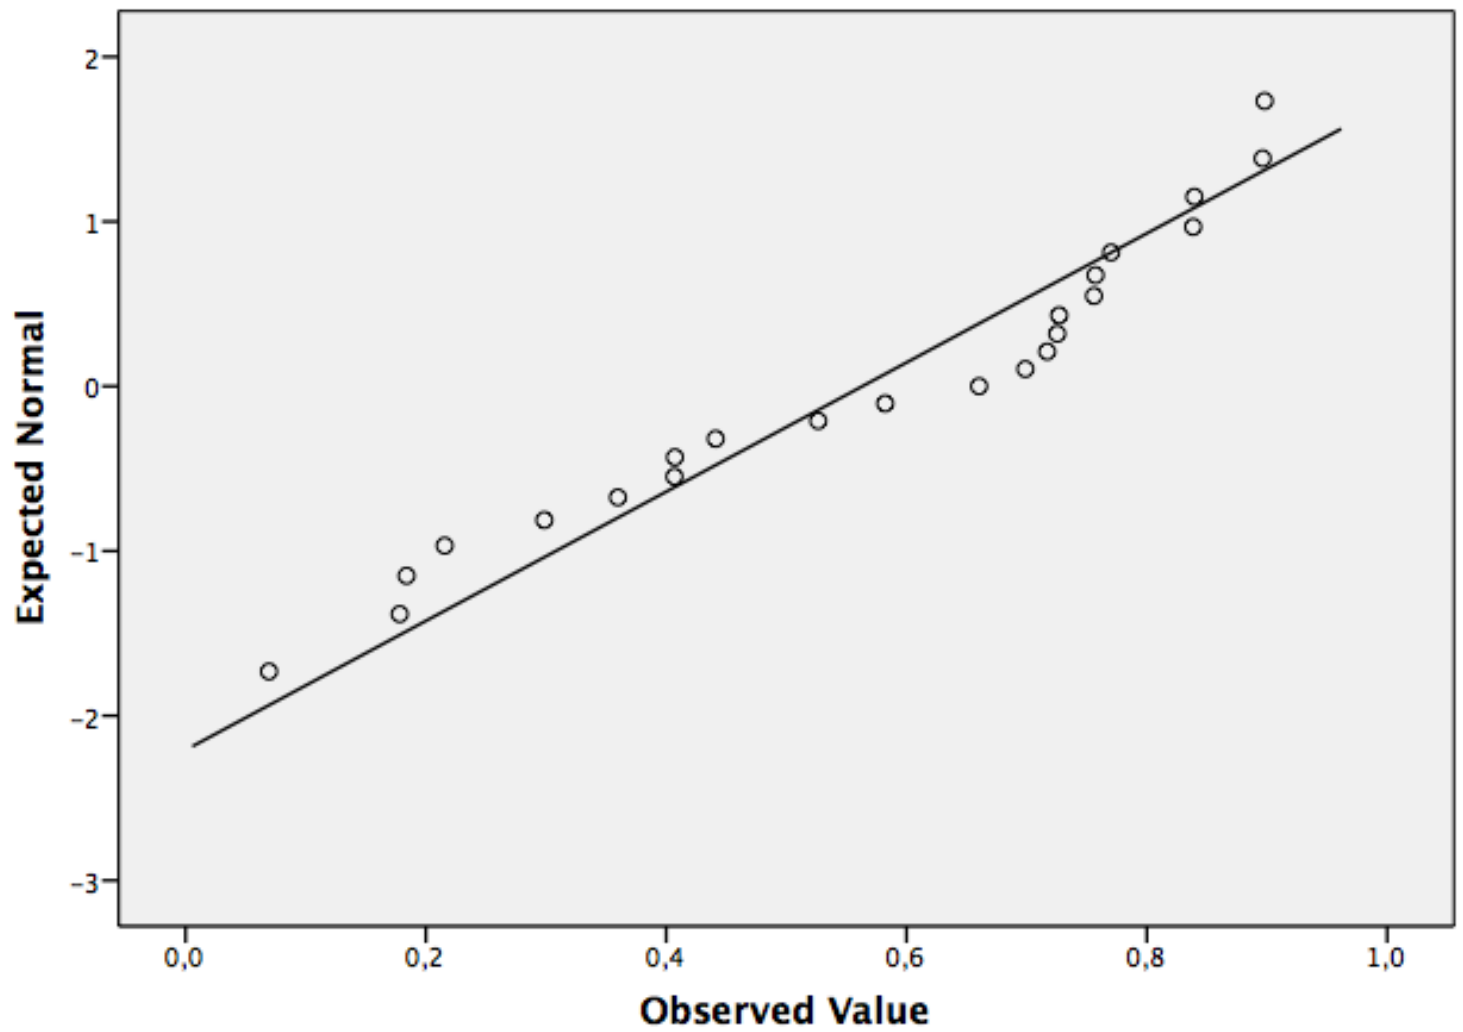

Normal Q-Q Plots

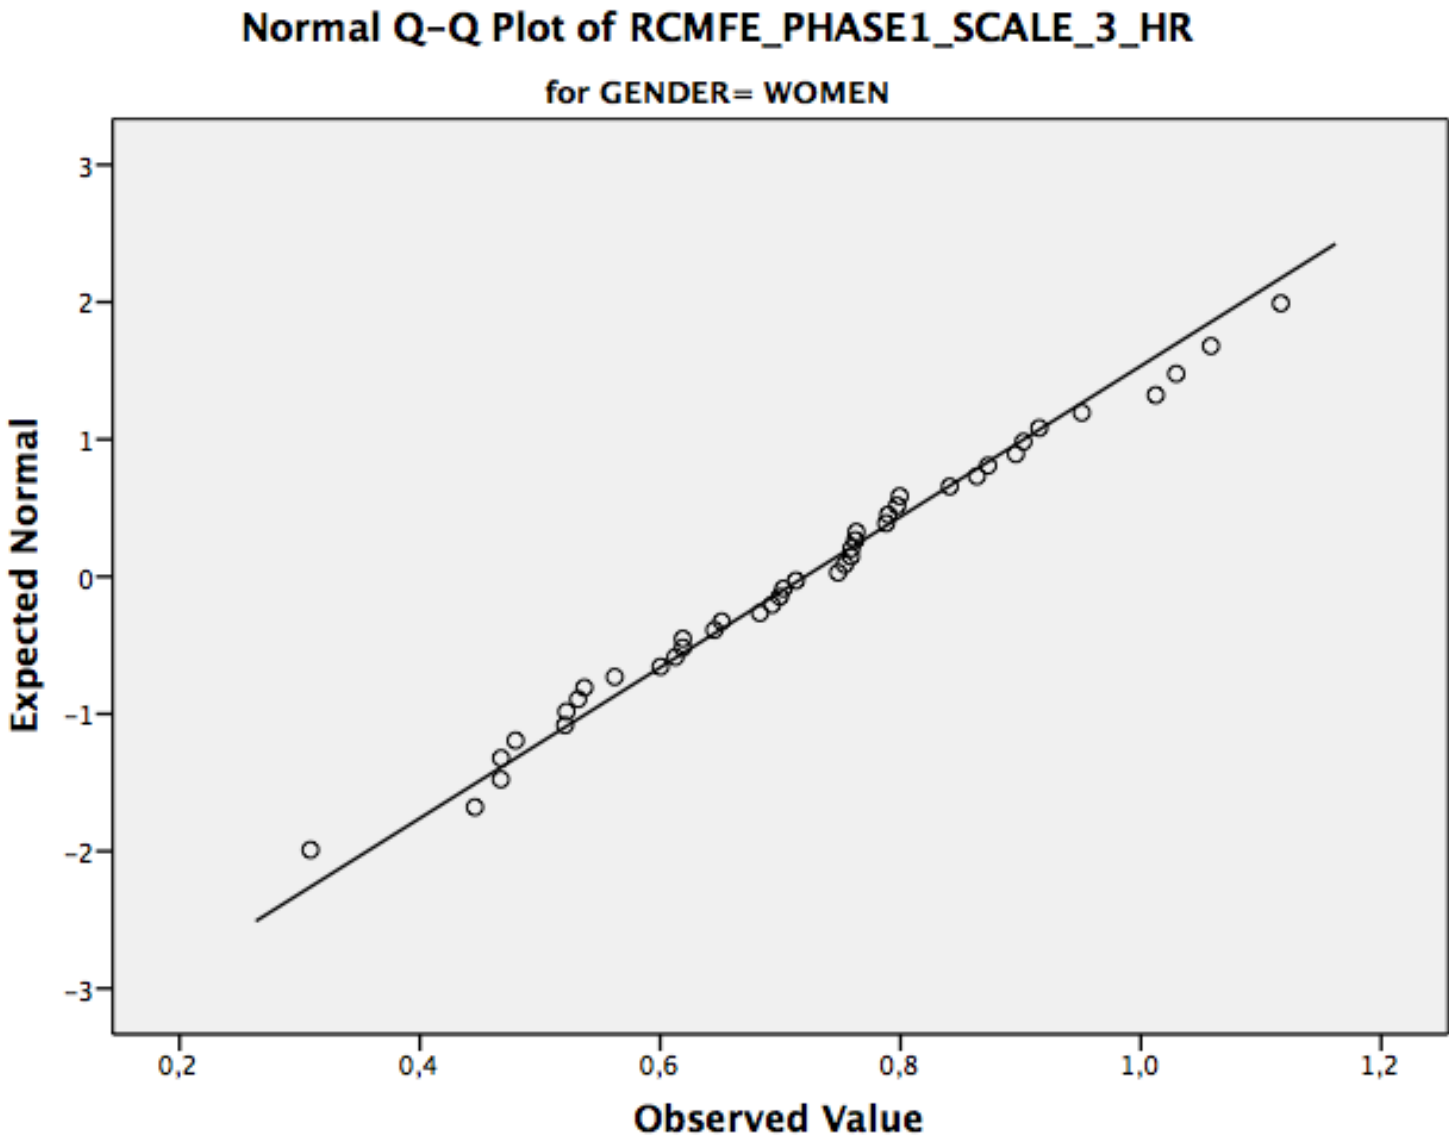

# Normal Q-Q Plot of RCMFE\_PHASE1\_SCALE\_3\_HR

for GENDER= MEN

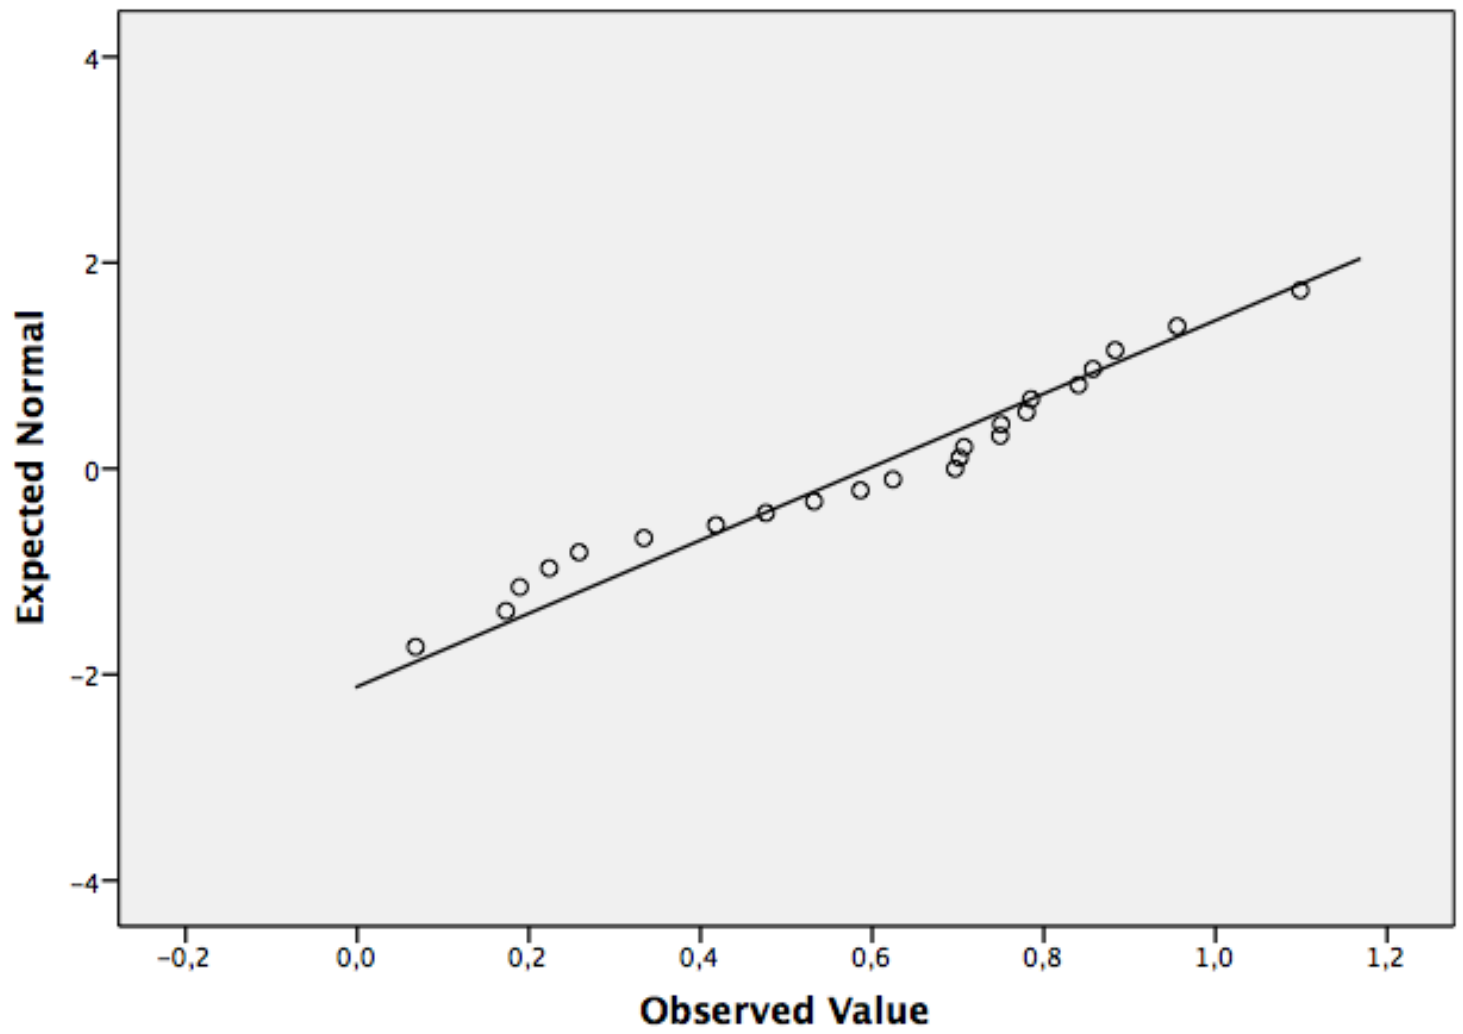

Normal Q-Q Plots

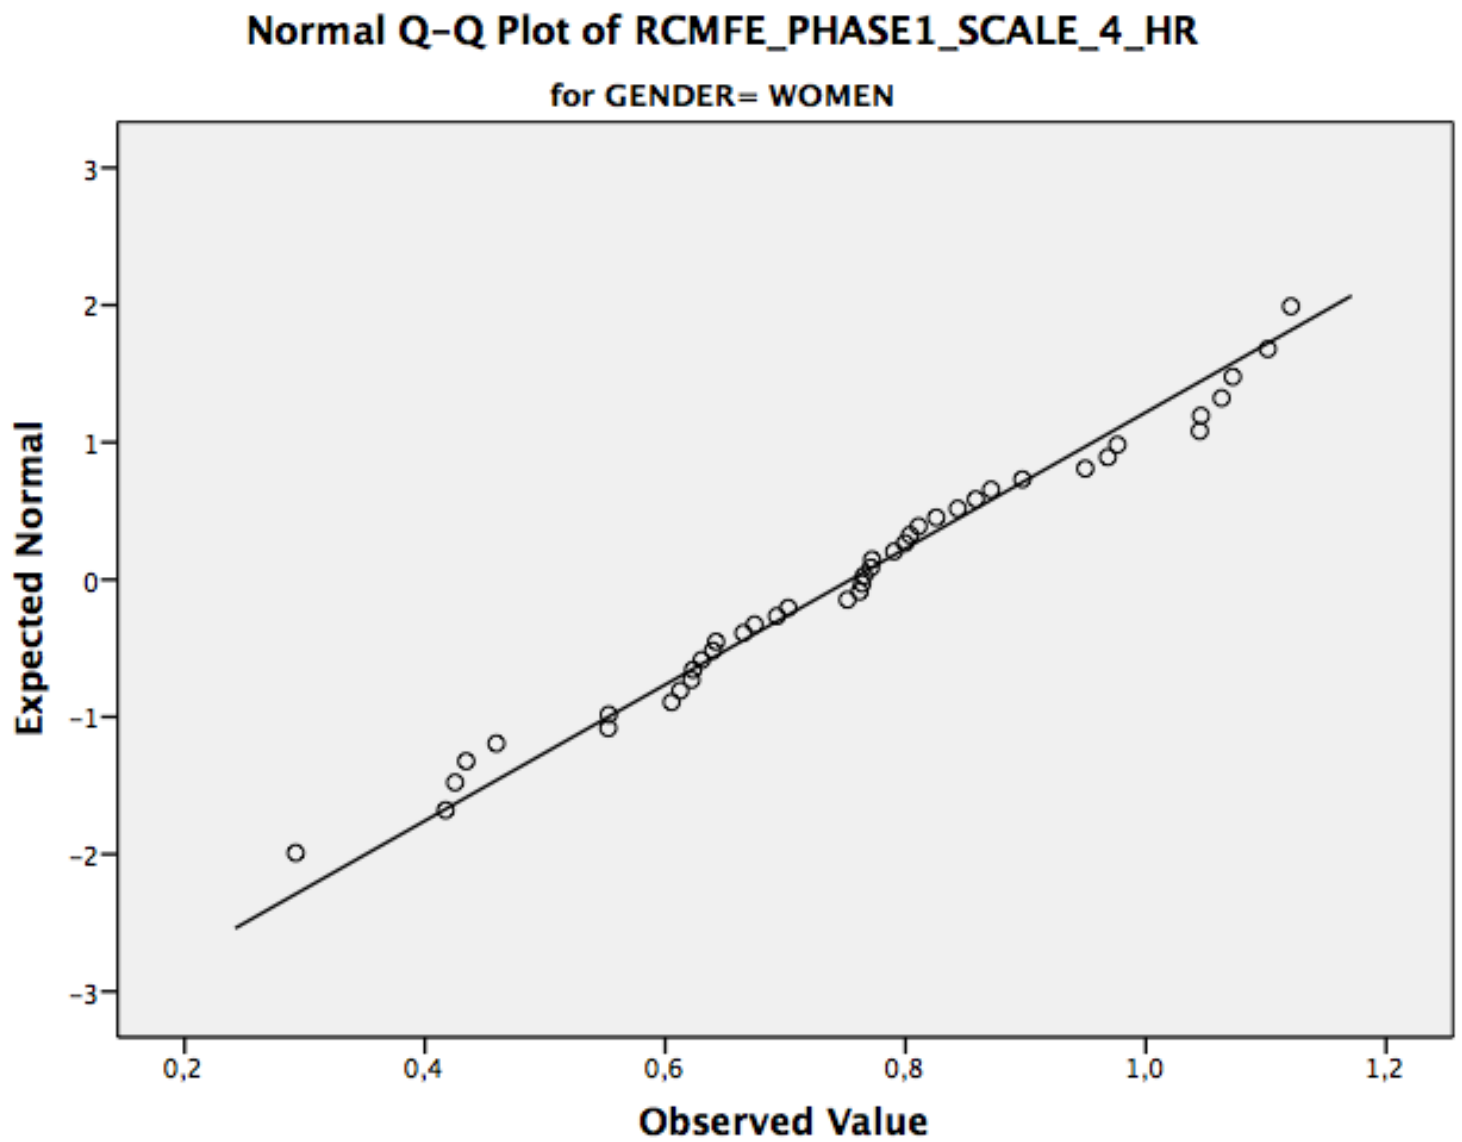

# Normal Q-Q Plot of RCMFE\_PHASE1\_SCALE\_4\_HR

for GENDER= MEN

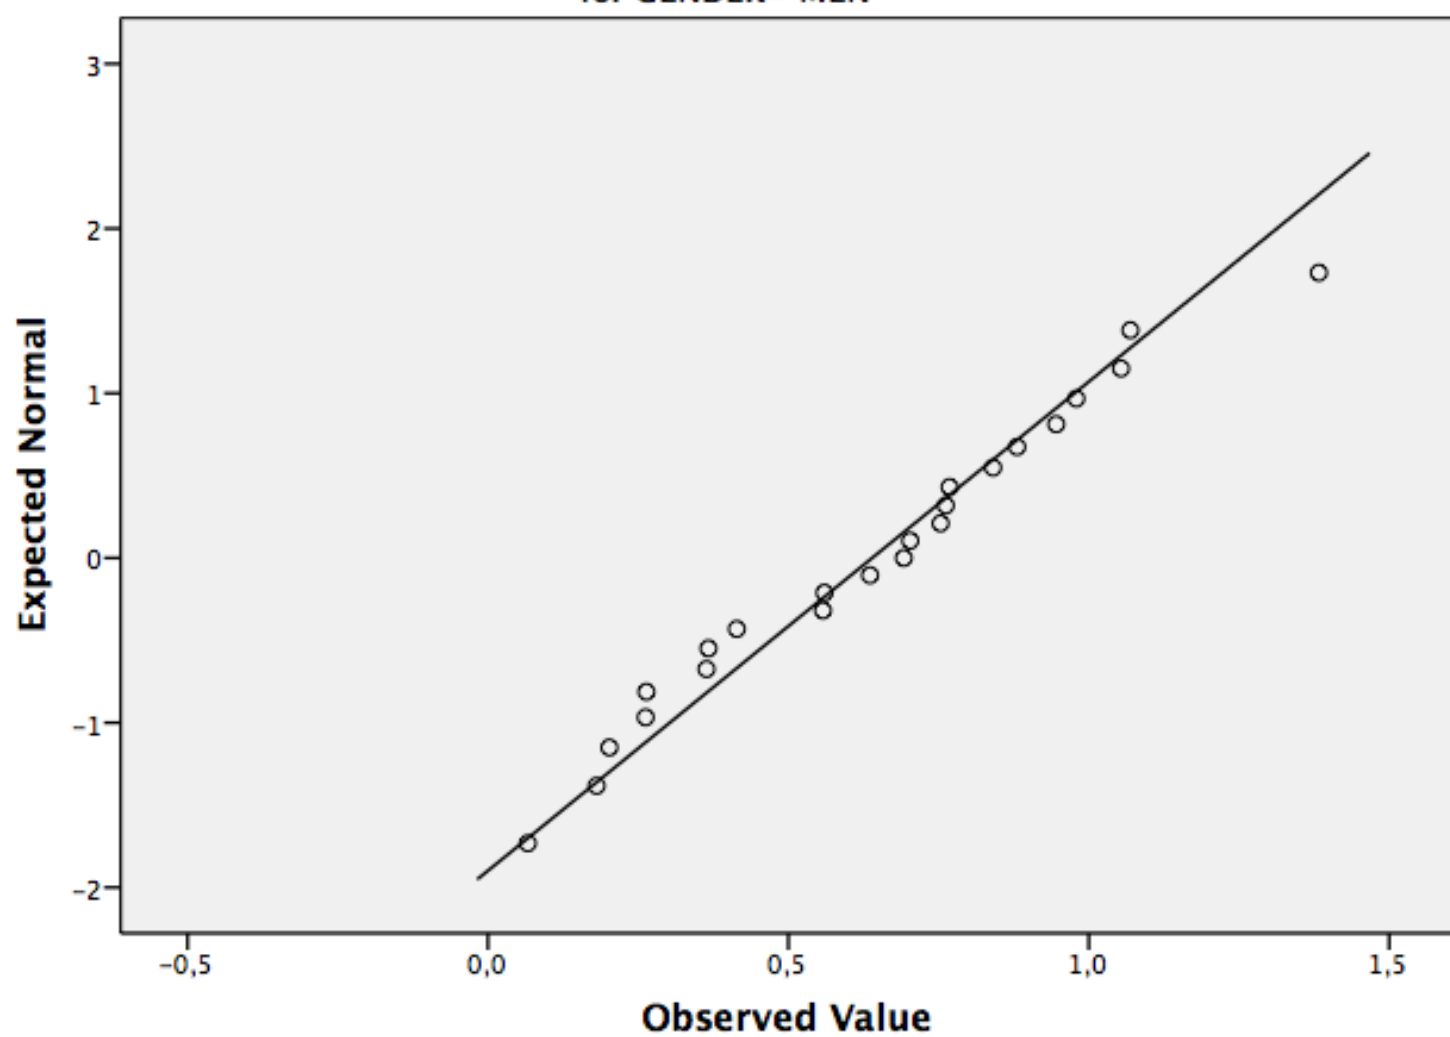

Normal Q-Q Plots

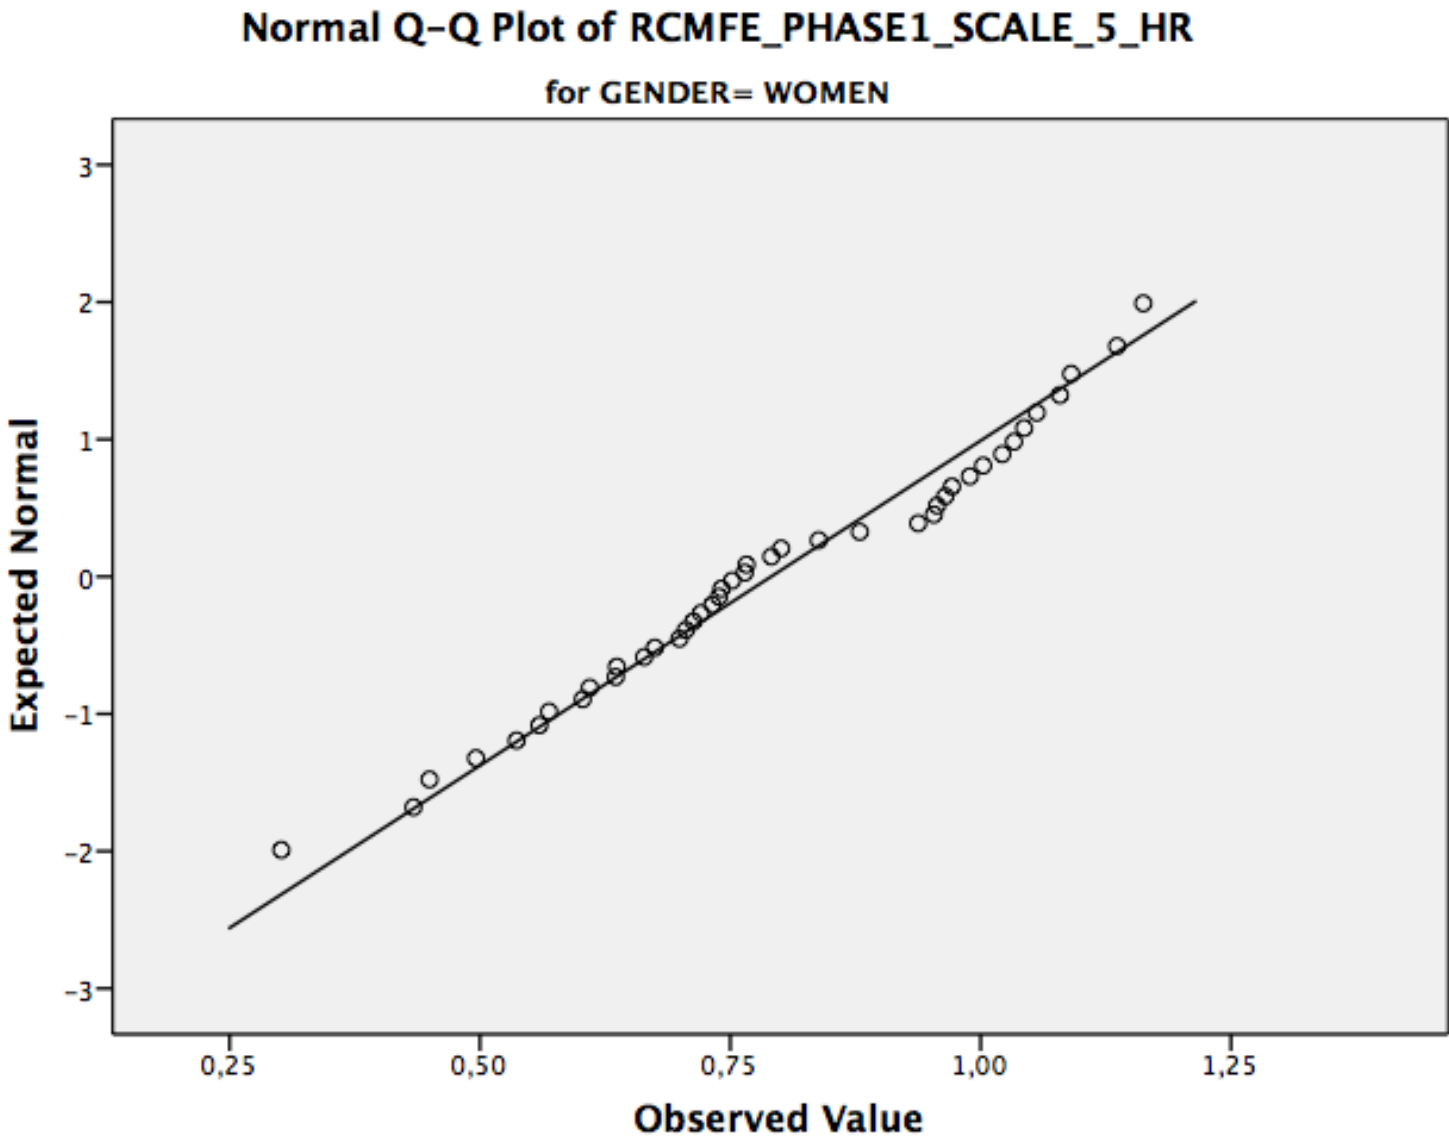

# Normal Q-Q Plot of RCMFE\_PHASE1\_SCALE\_5\_HR

for GENDER= MEN

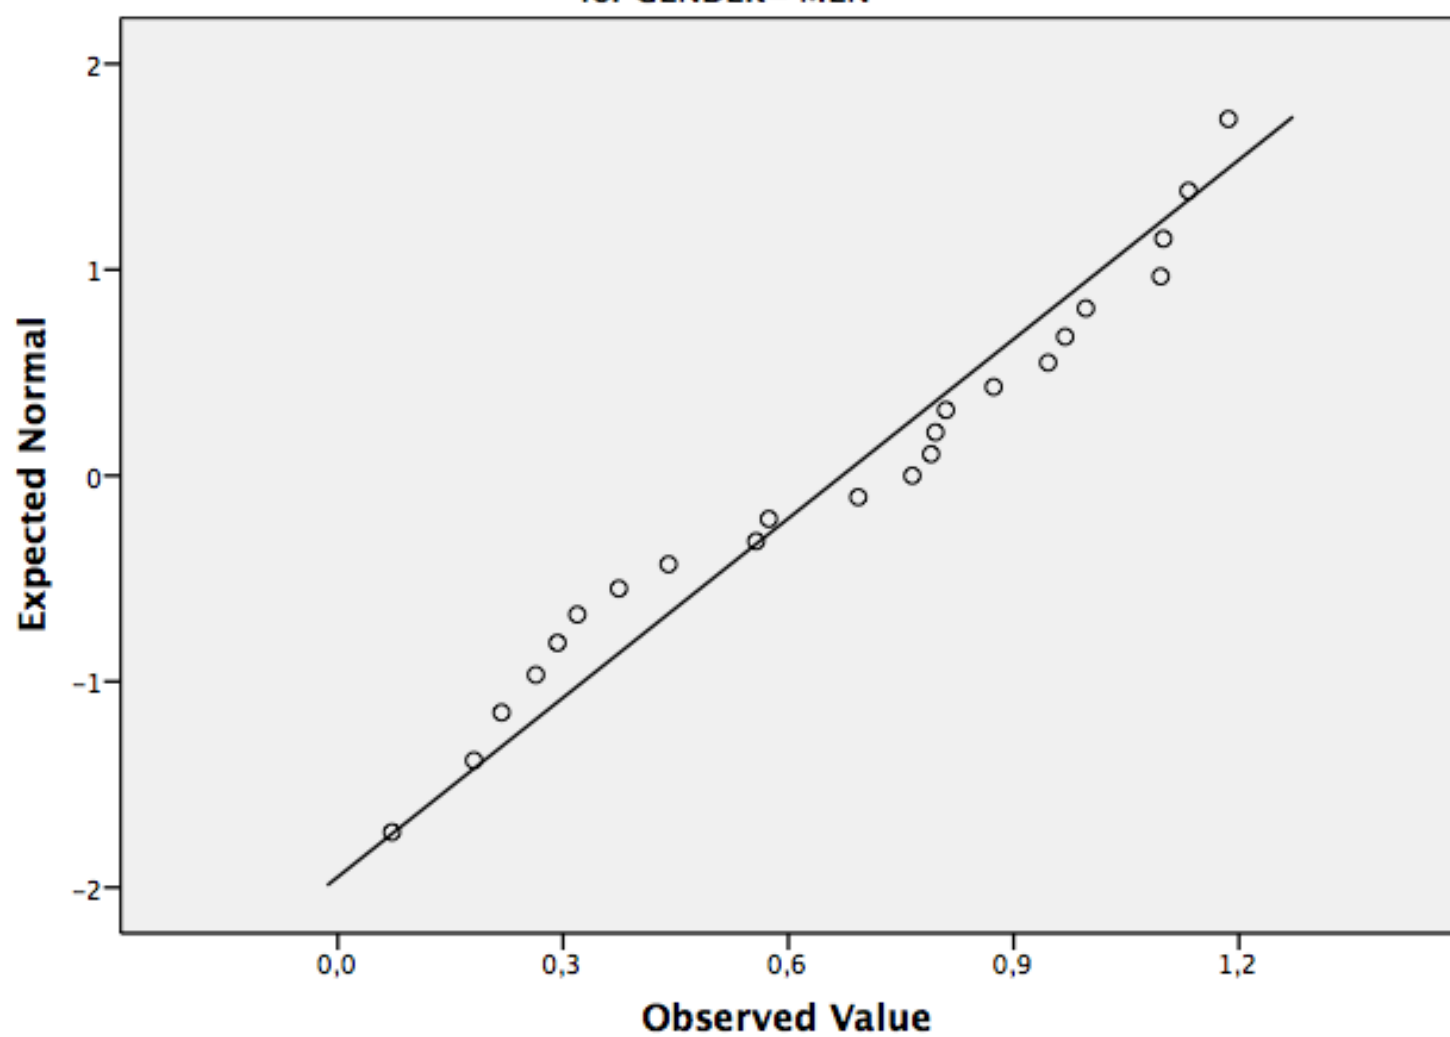

Normal Q-Q Plots

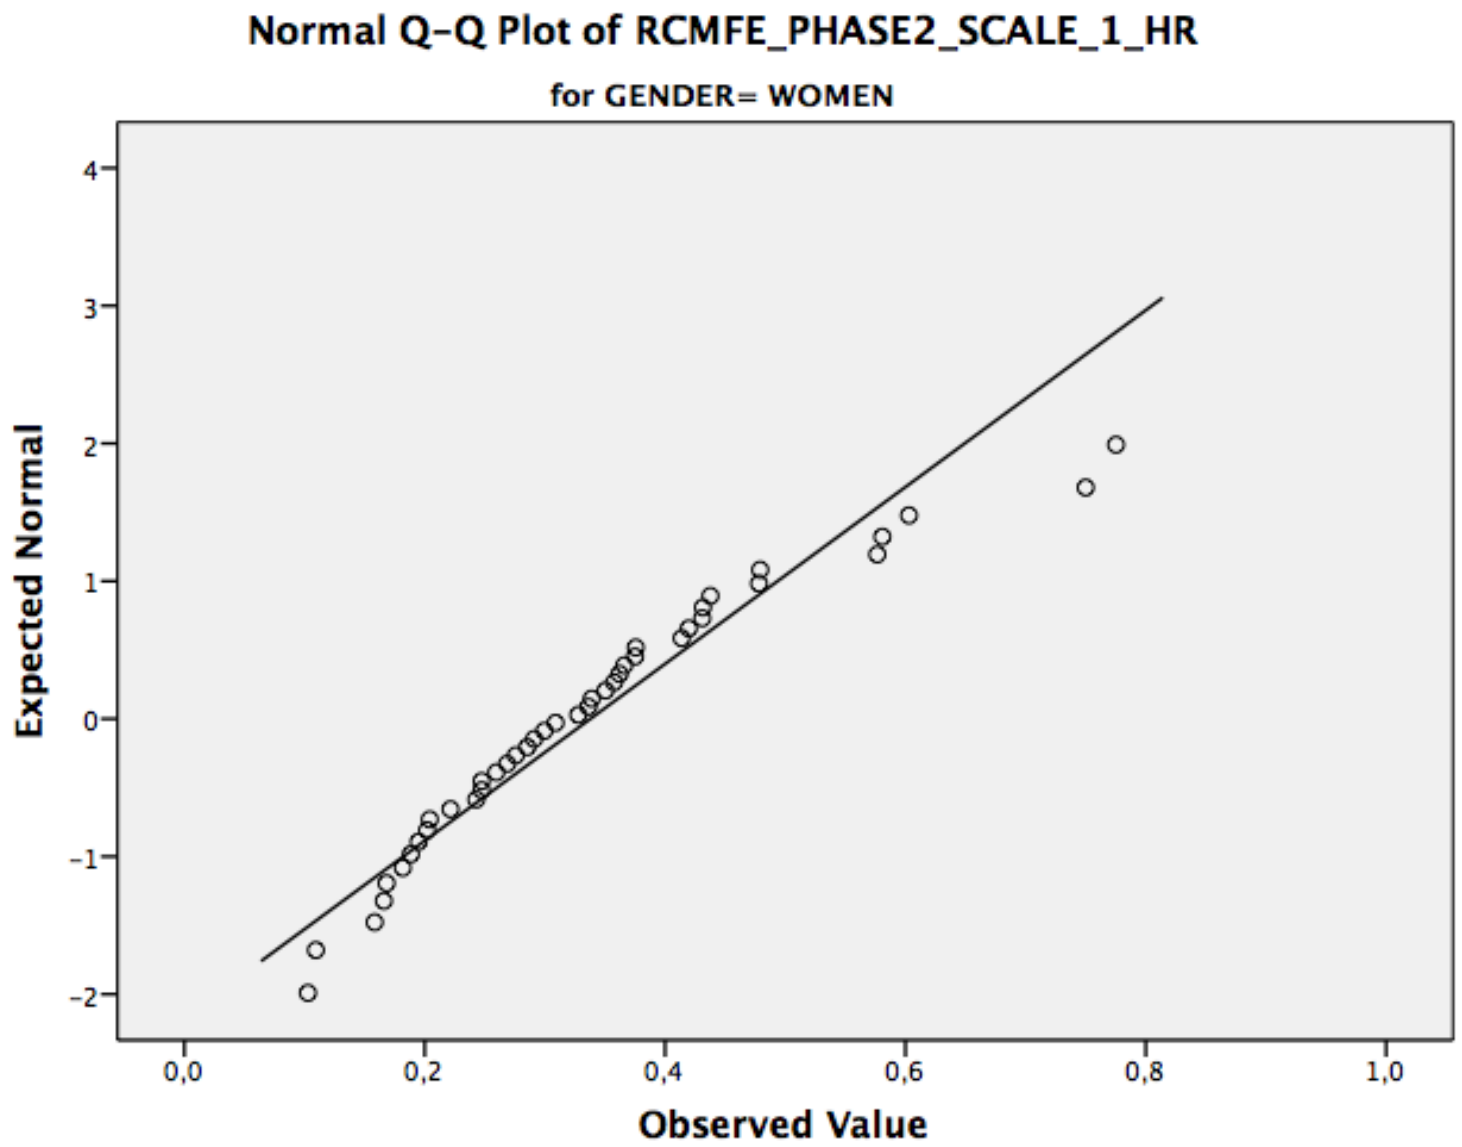



# Normal Q-Q Plot of RCMFE\_PHASE2\_SCALE\_1\_HR

for GENDER= MEN

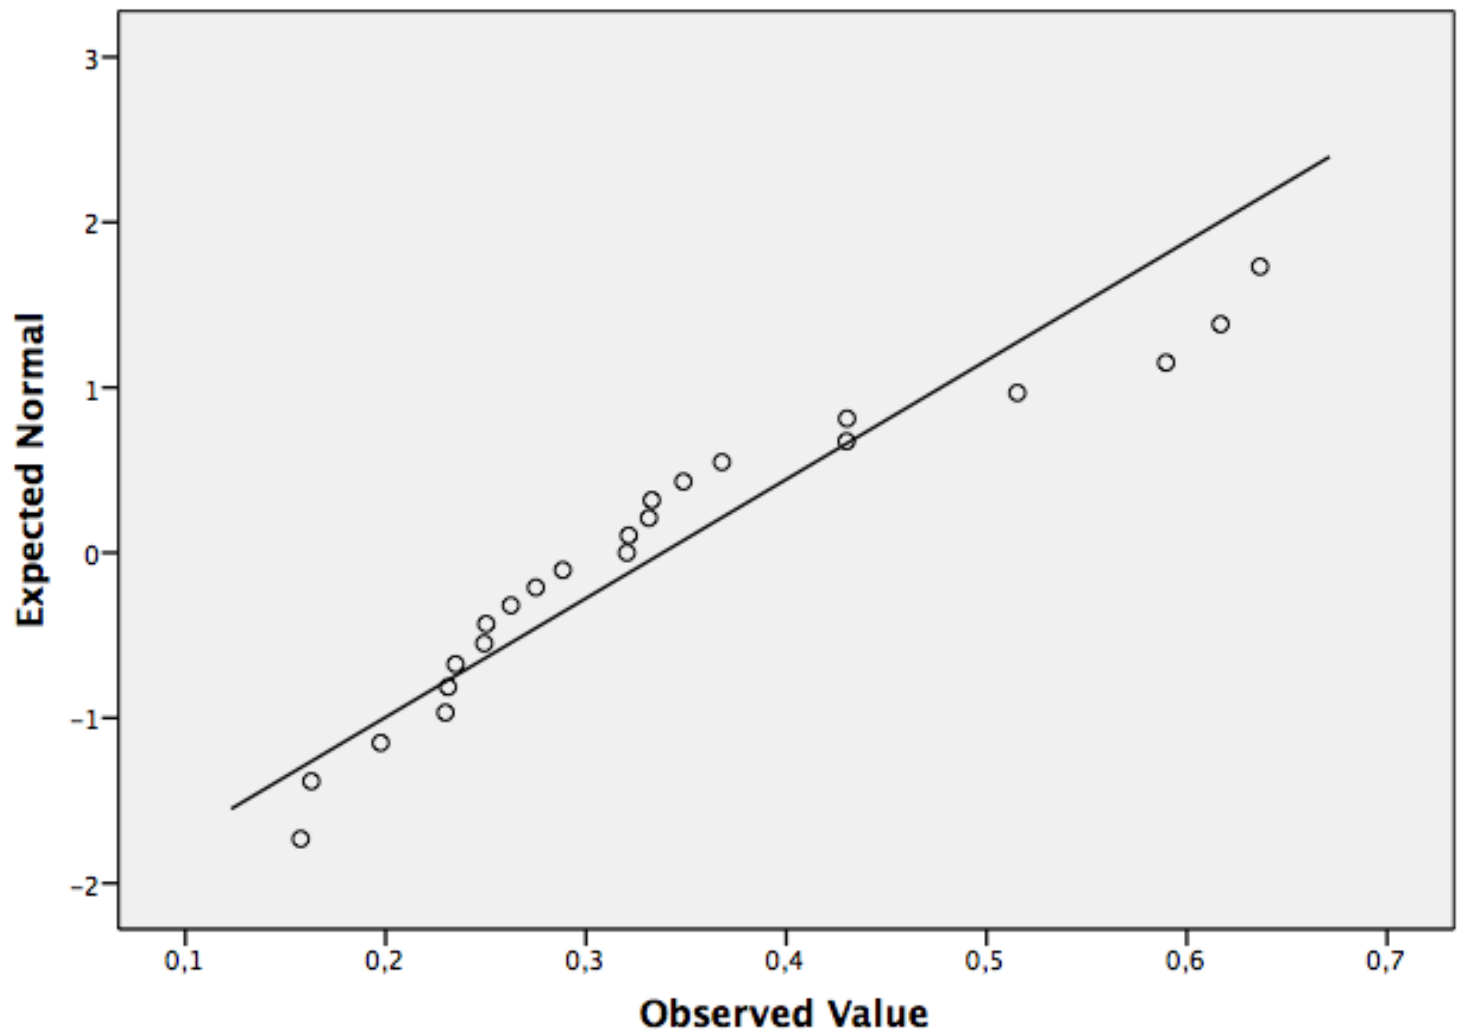

Normal Q-Q Plots

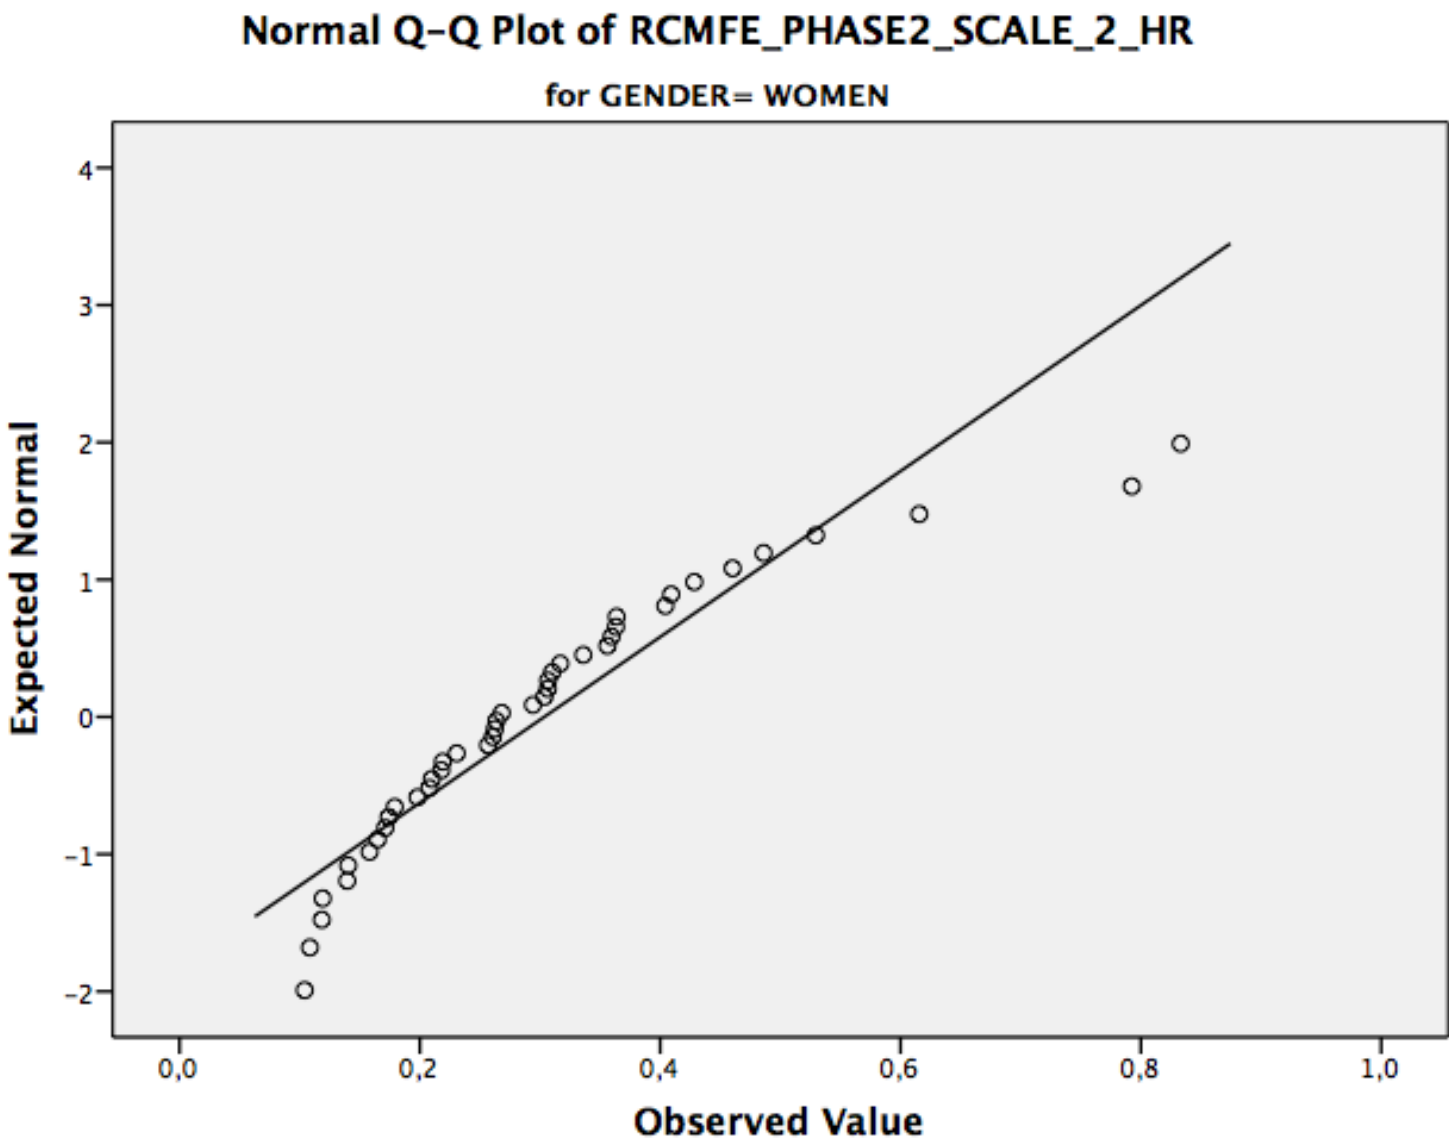

# Normal Q-Q Plot of RCMFE\_PHASE2\_SCALE\_2\_HR

for GENDER= MEN

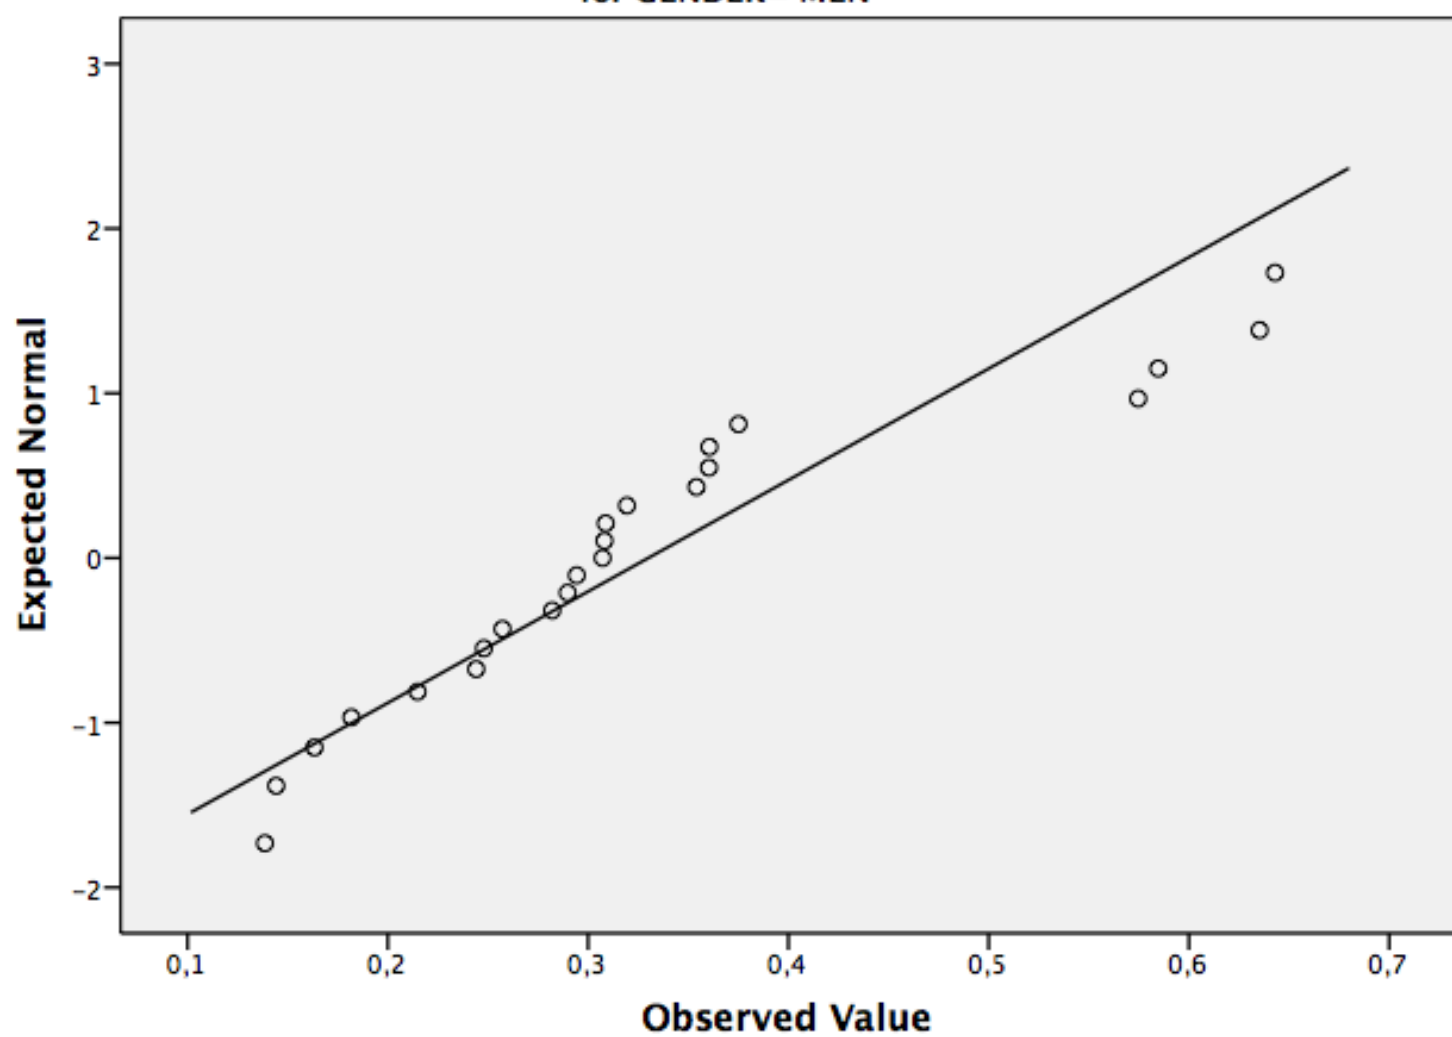

Normal Q-Q Plots

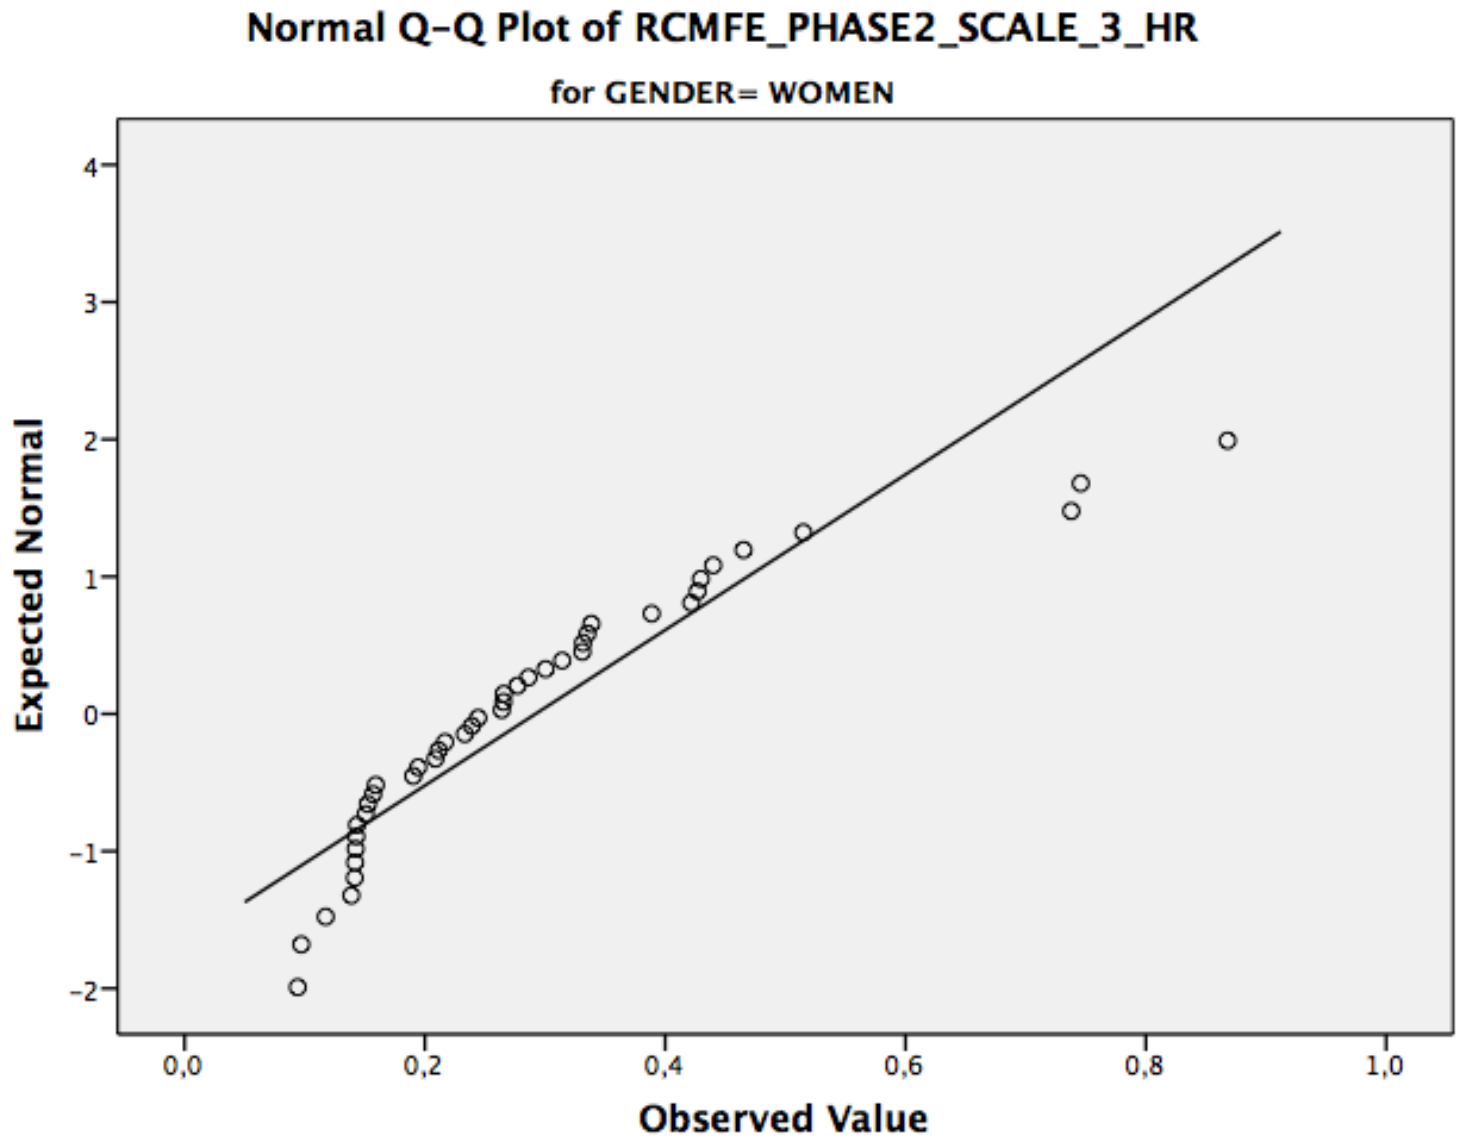

# Normal Q-Q Plot of RCMFE\_PHASE2\_SCALE\_3\_HR

for GENDER= MEN

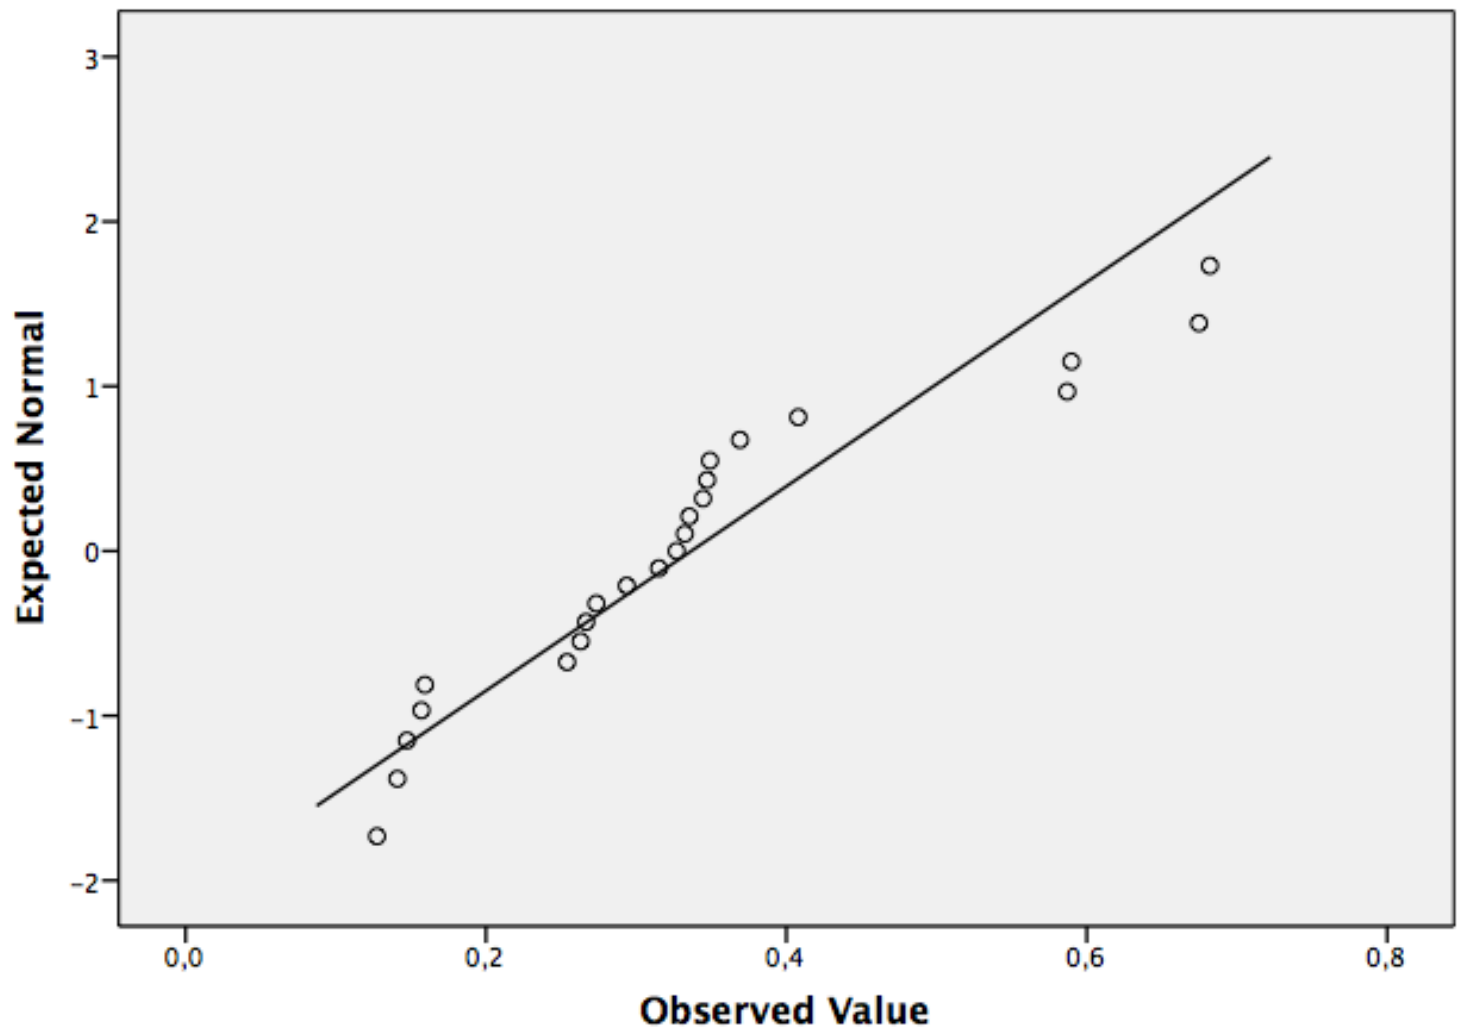

Normal Q-Q Plots

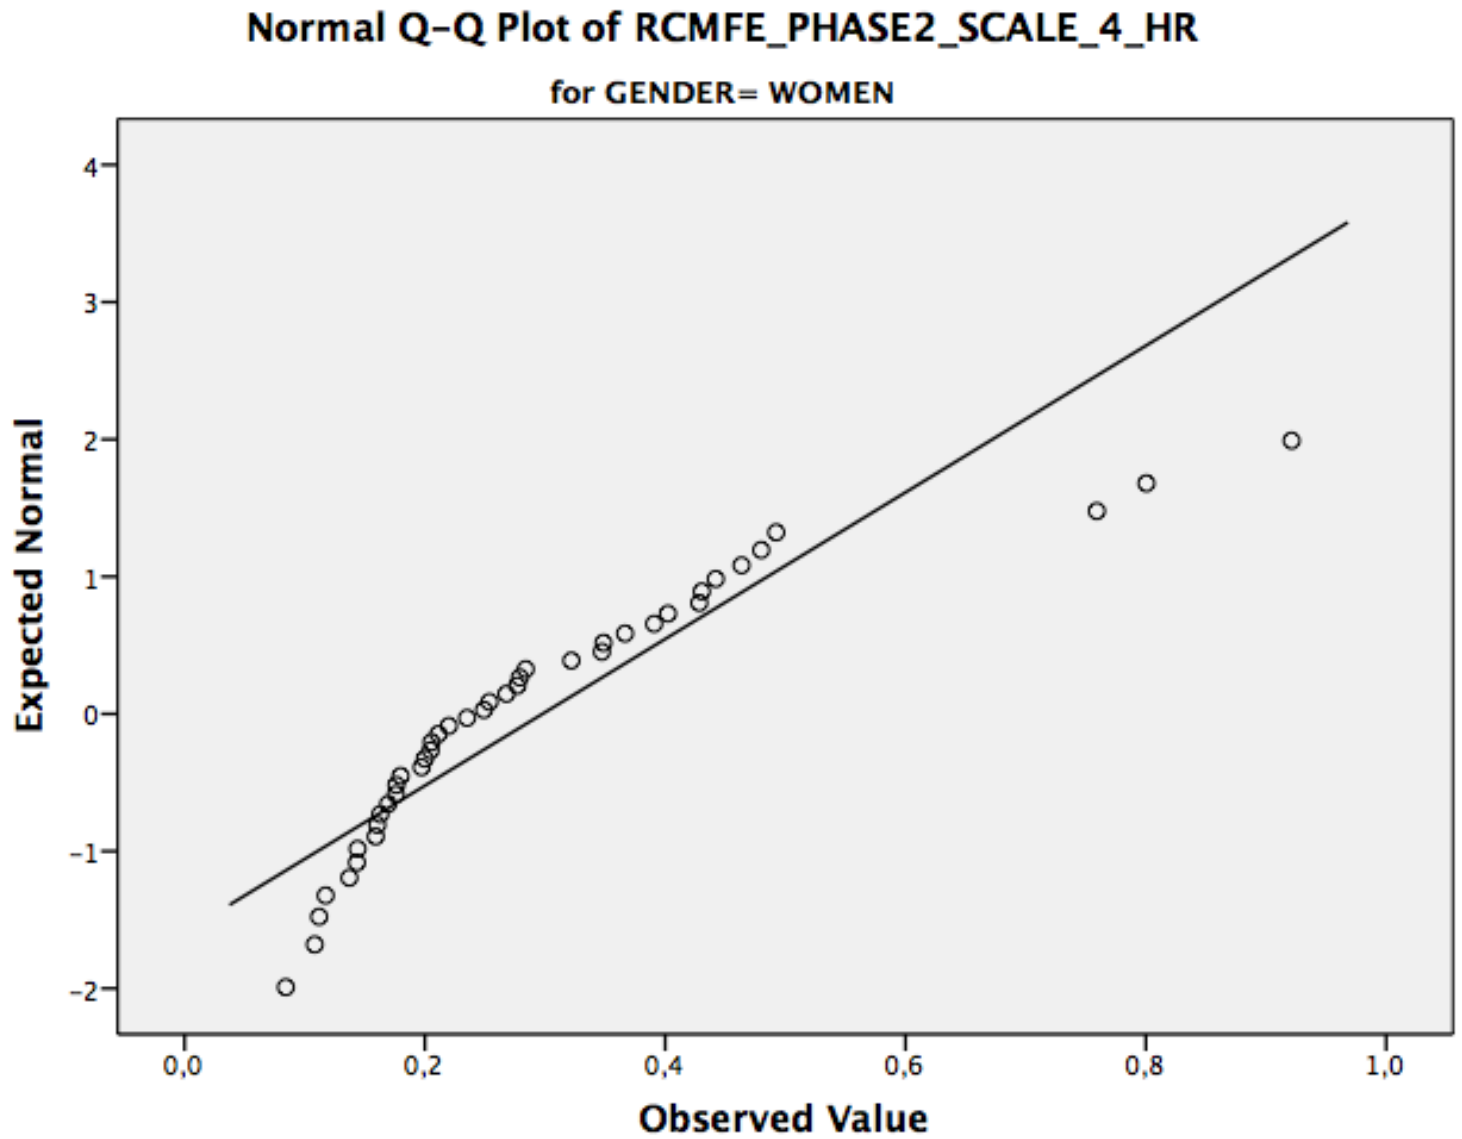

# Normal Q-Q Plot of RCMFE\_PHASE2\_SCALE\_4\_HR

for GENDER= MEN

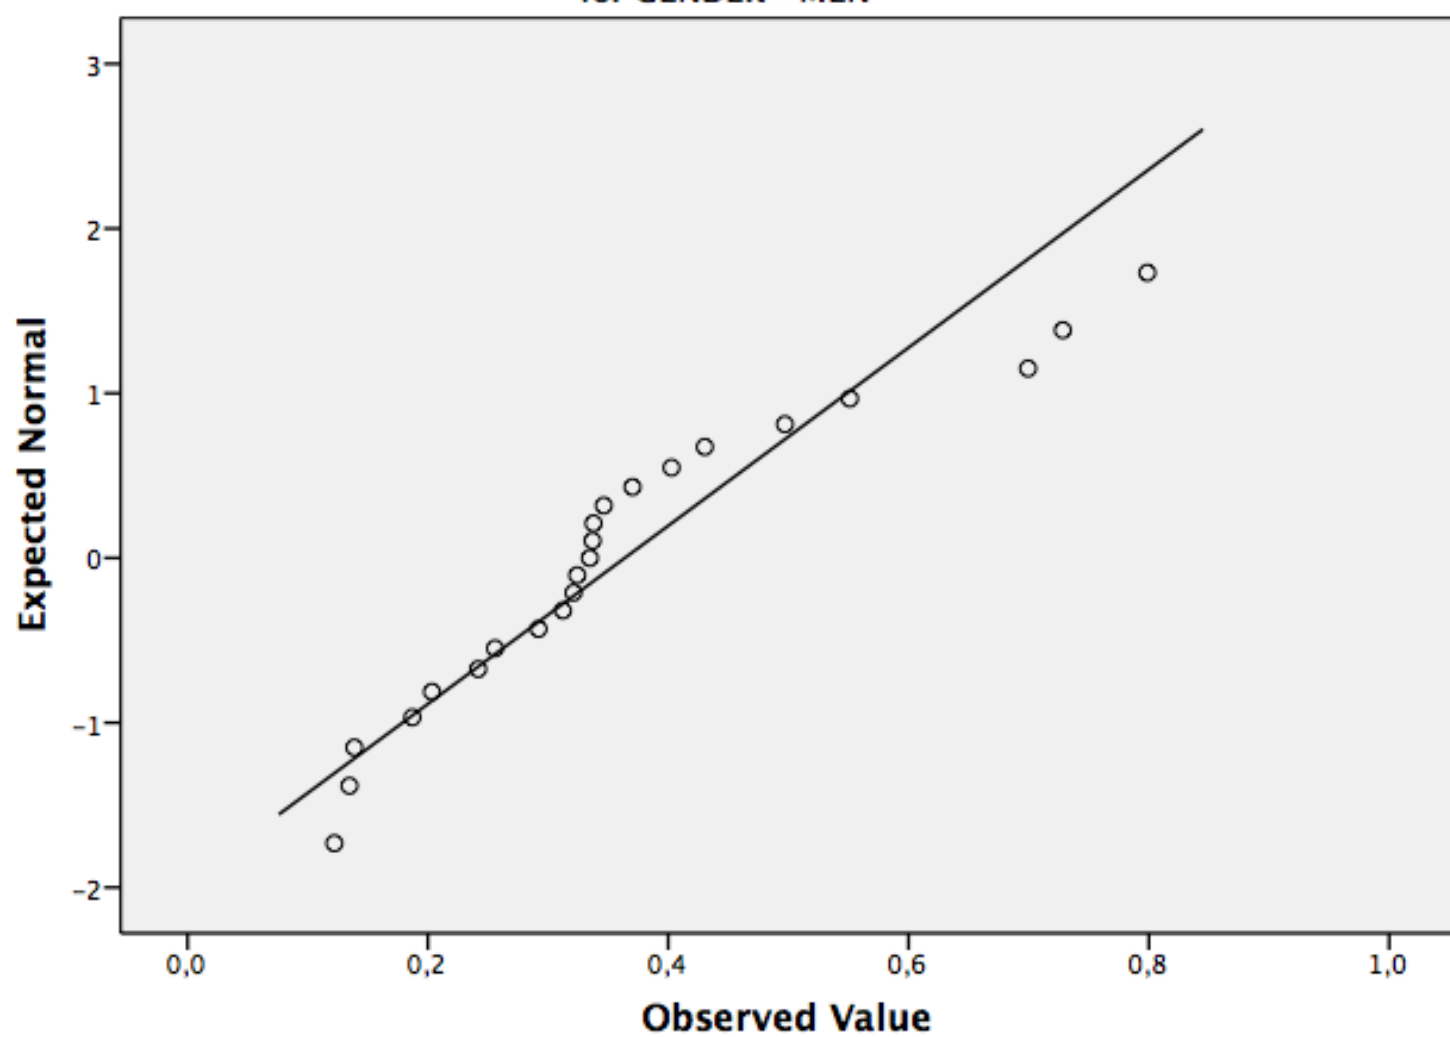

Normal Q-Q Plots

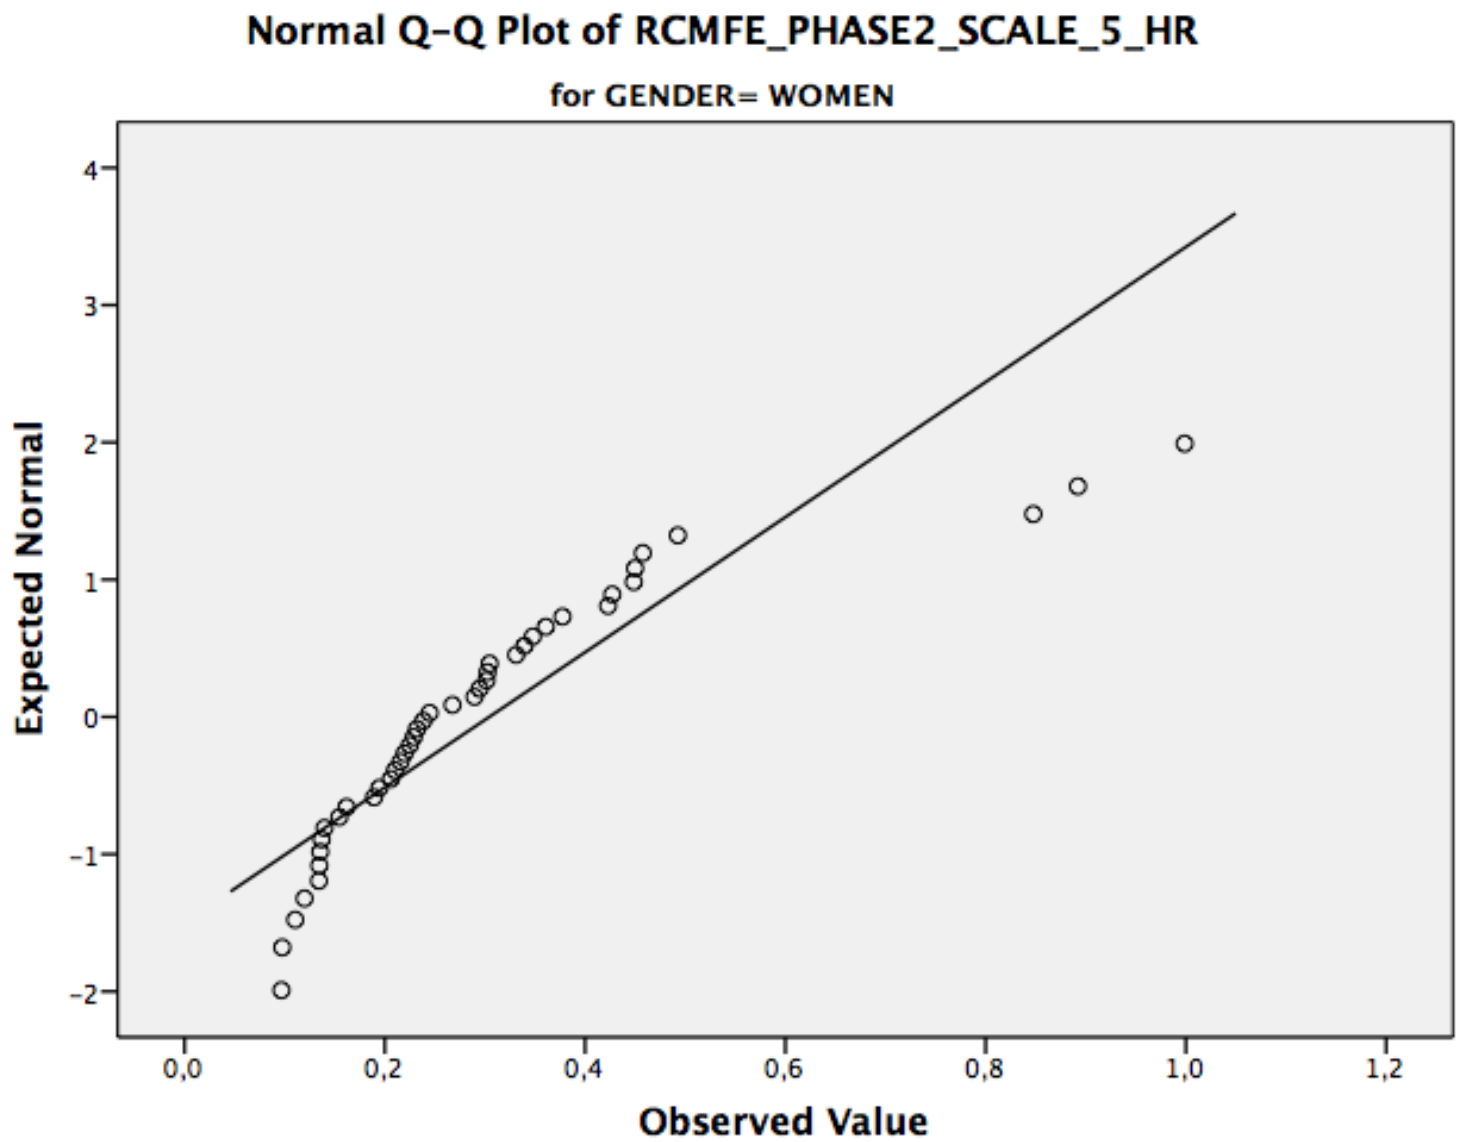



# Normal Q-Q Plot of RCMFE\_PHASE2\_SCALE\_5\_HR

for GENDER= MEN

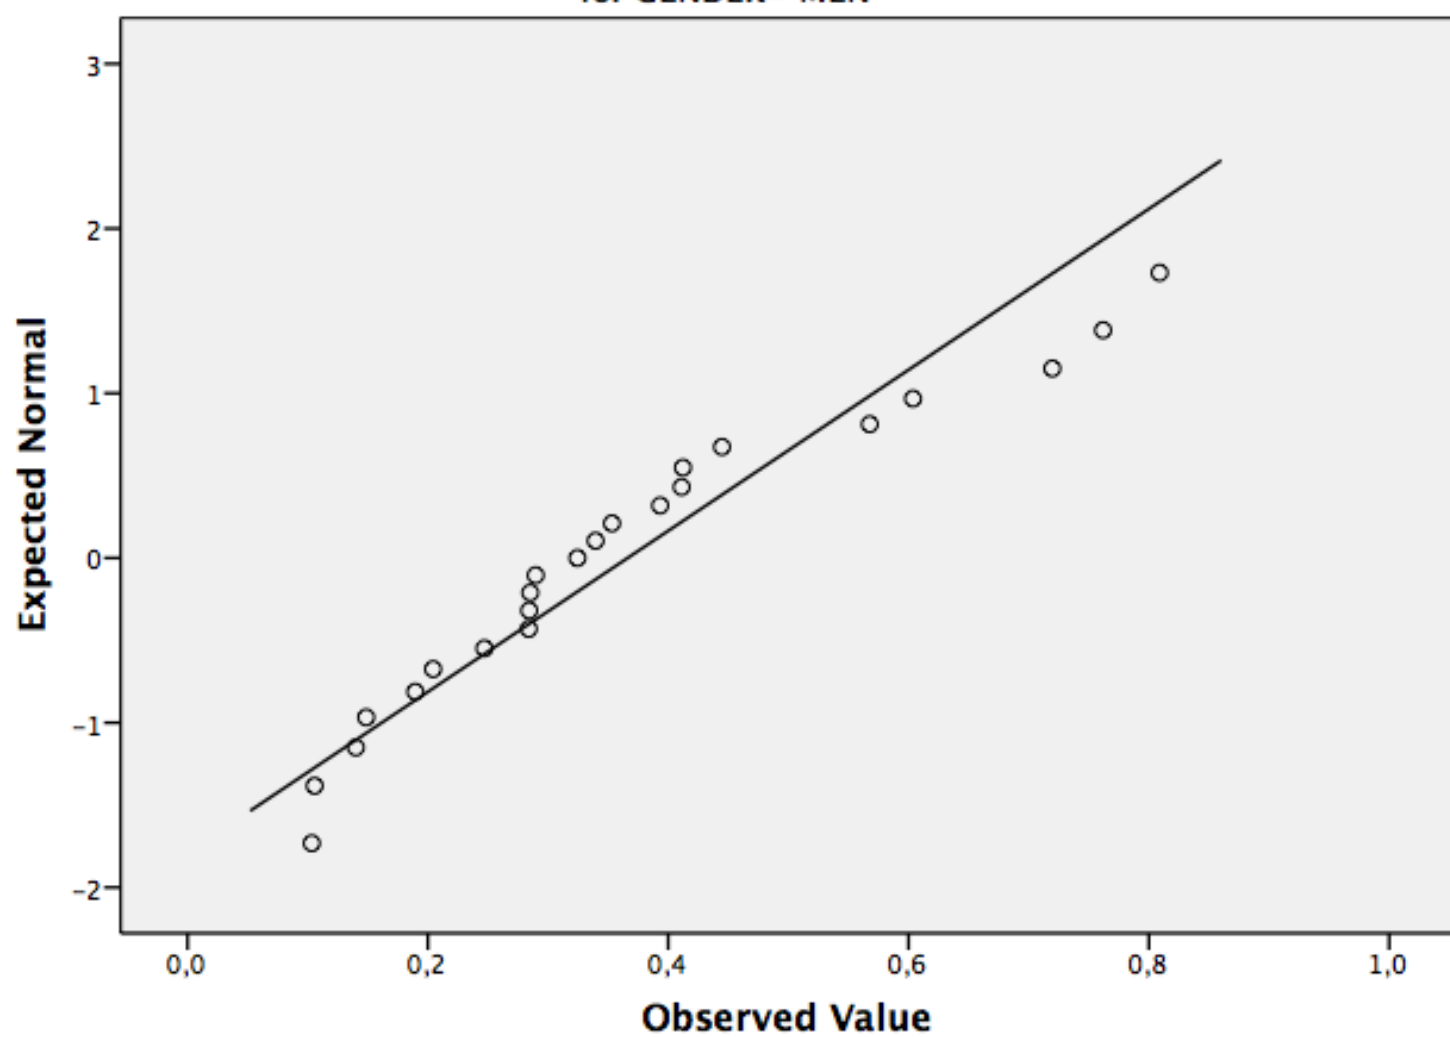

Normal Q-Q Plots

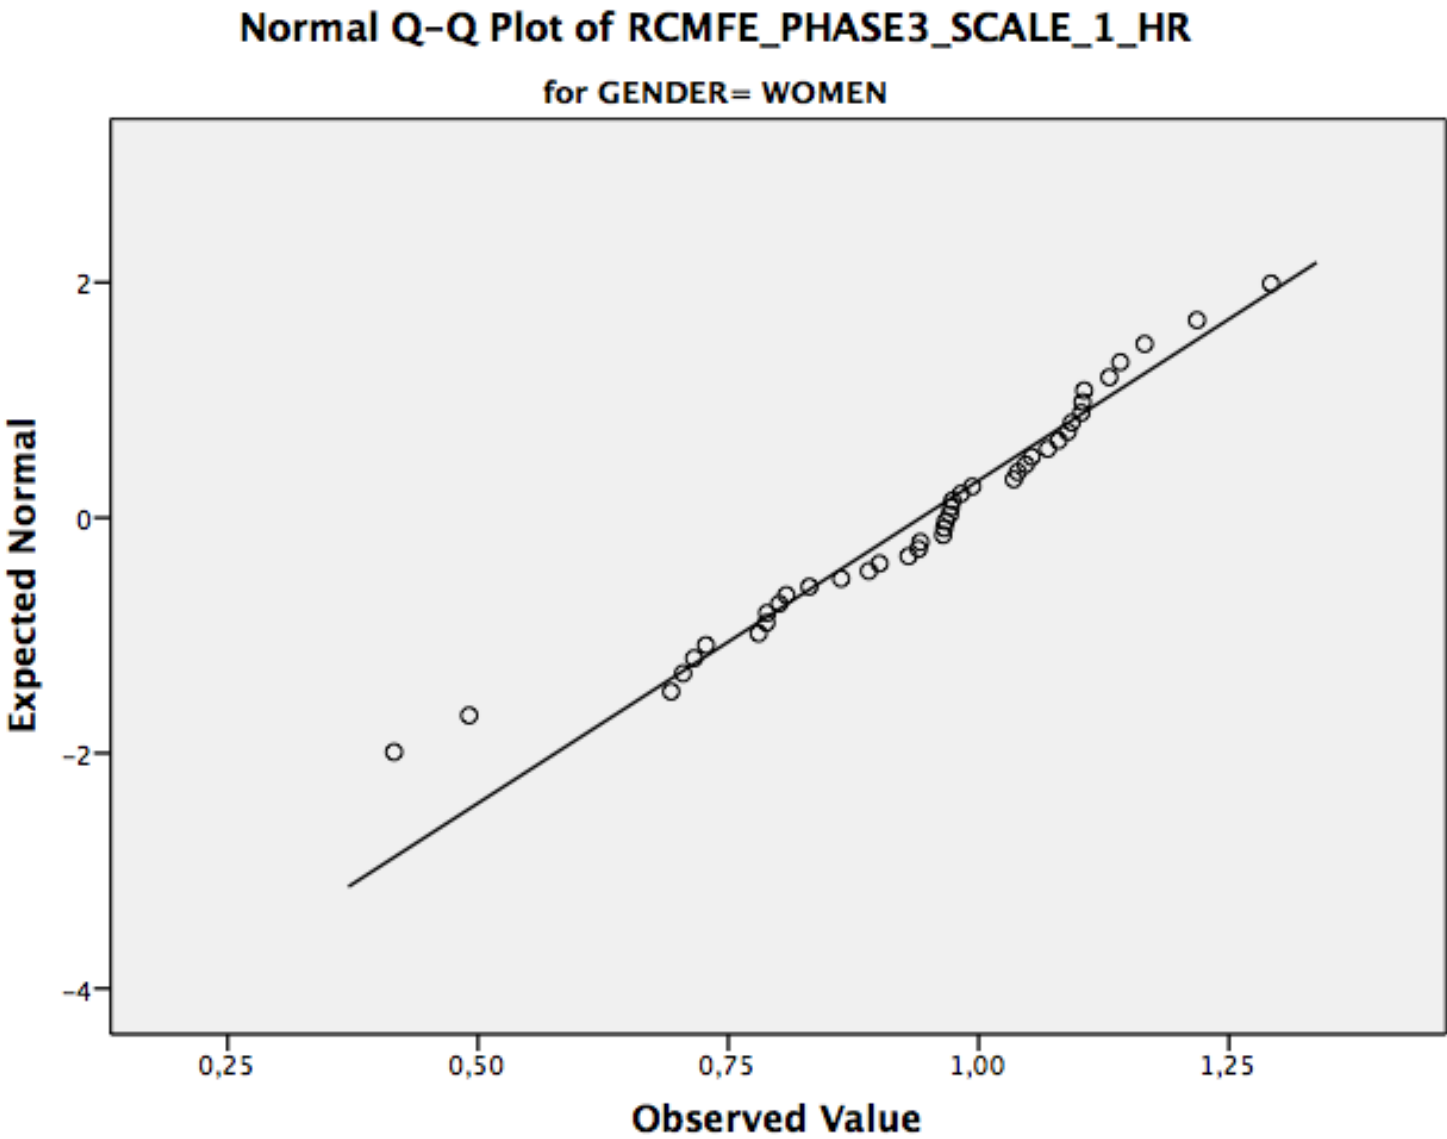

# Normal Q-Q Plot of RCMFE\_PHASE3\_SCALE\_1\_HR

for GENDER= MEN

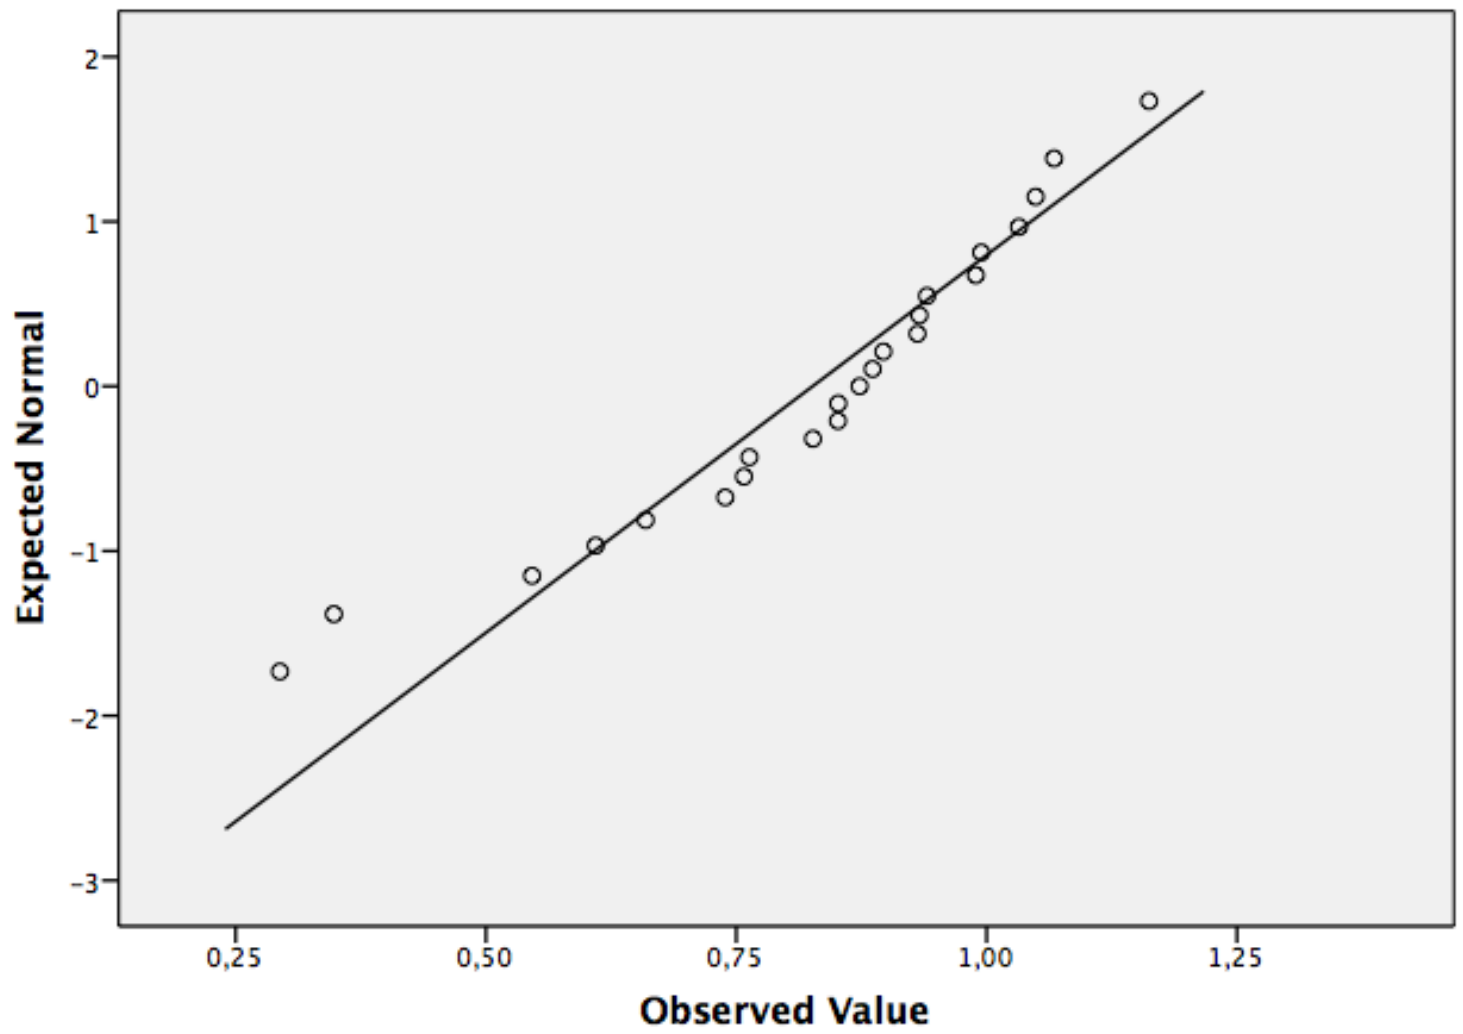

Normal Q-Q Plots

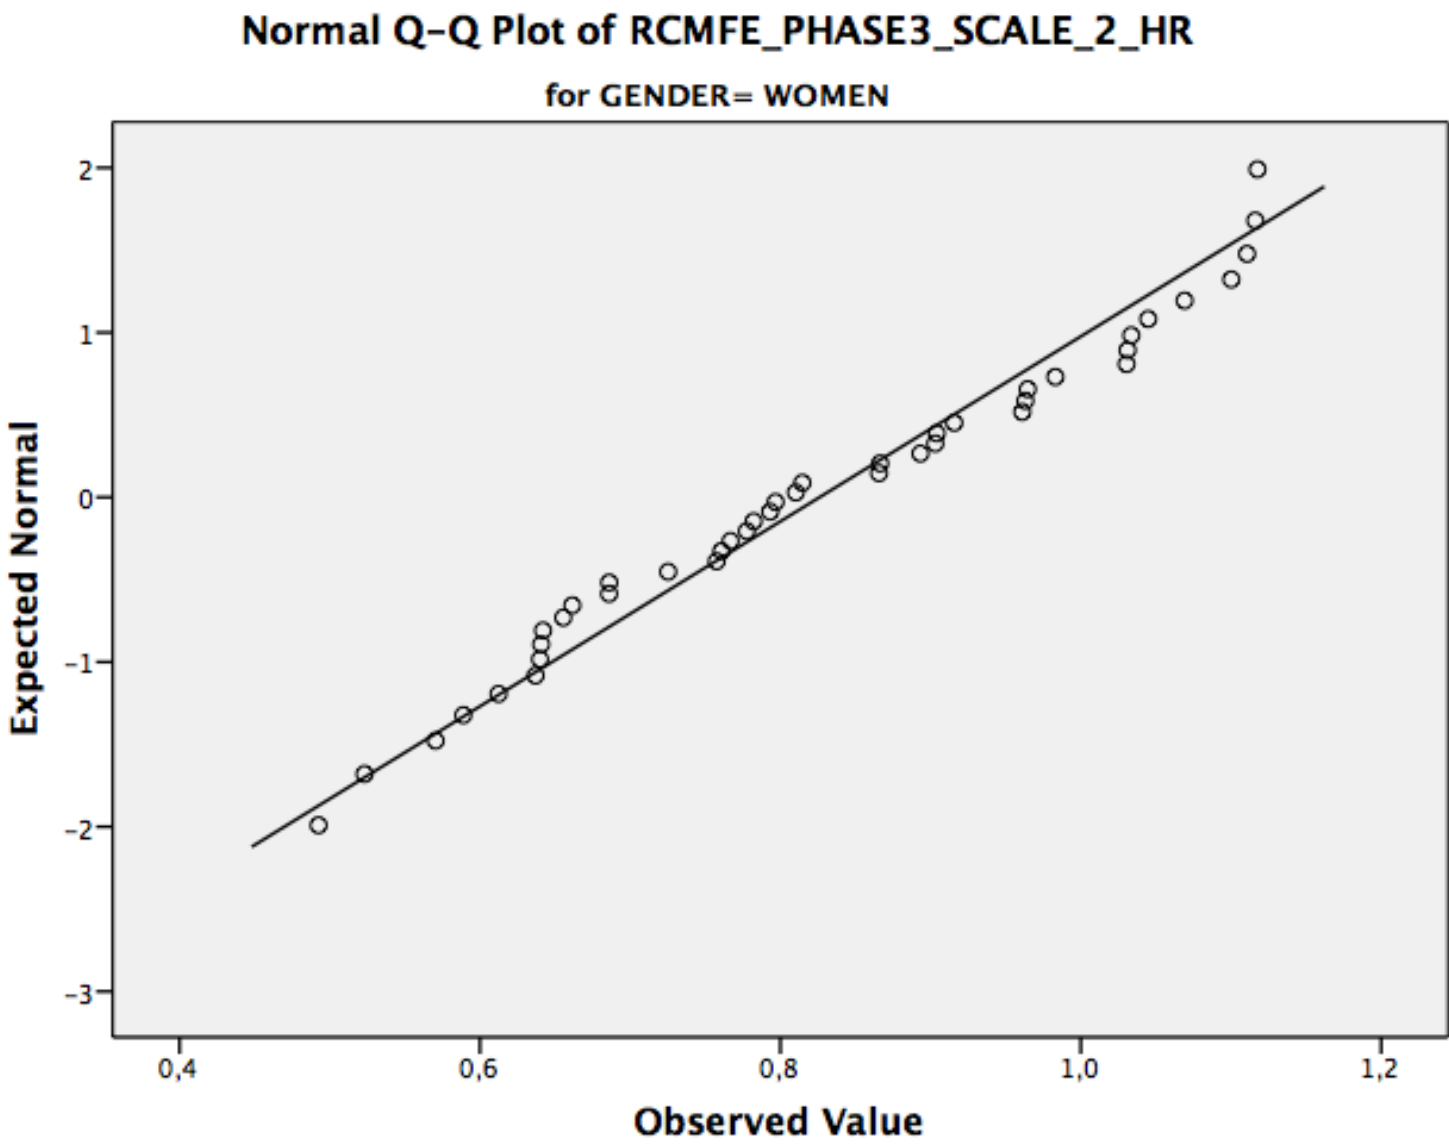

# Normal Q-Q Plot of RCMFE\_PHASE3\_SCALE\_2\_HR

for GENDER= MEN

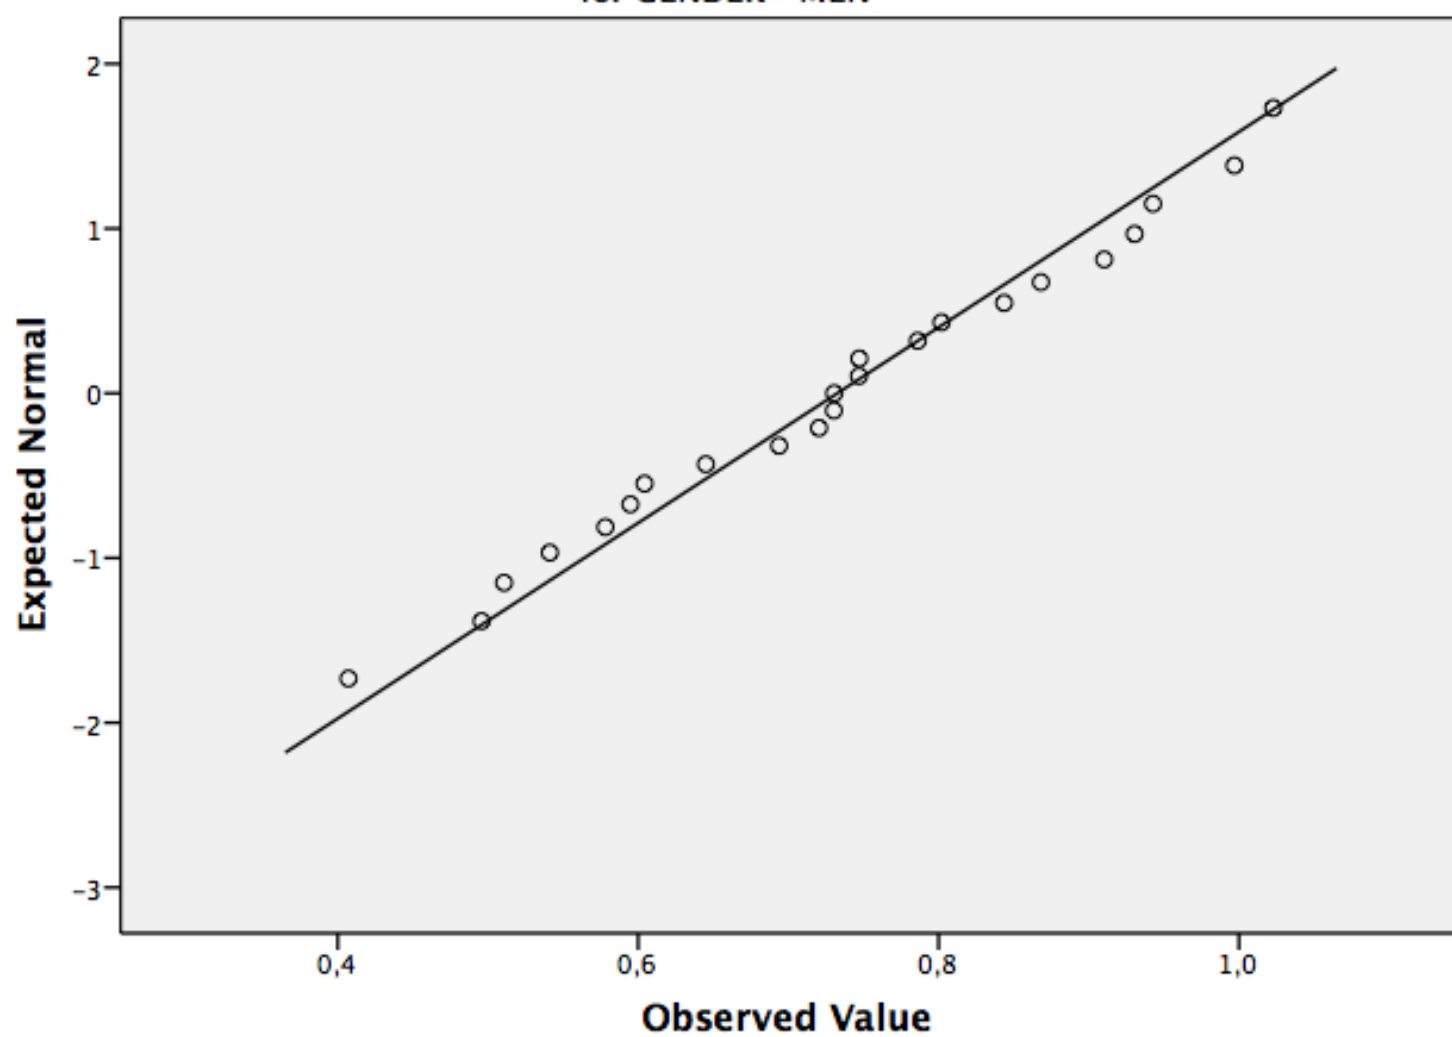

Normal Q-Q Plots

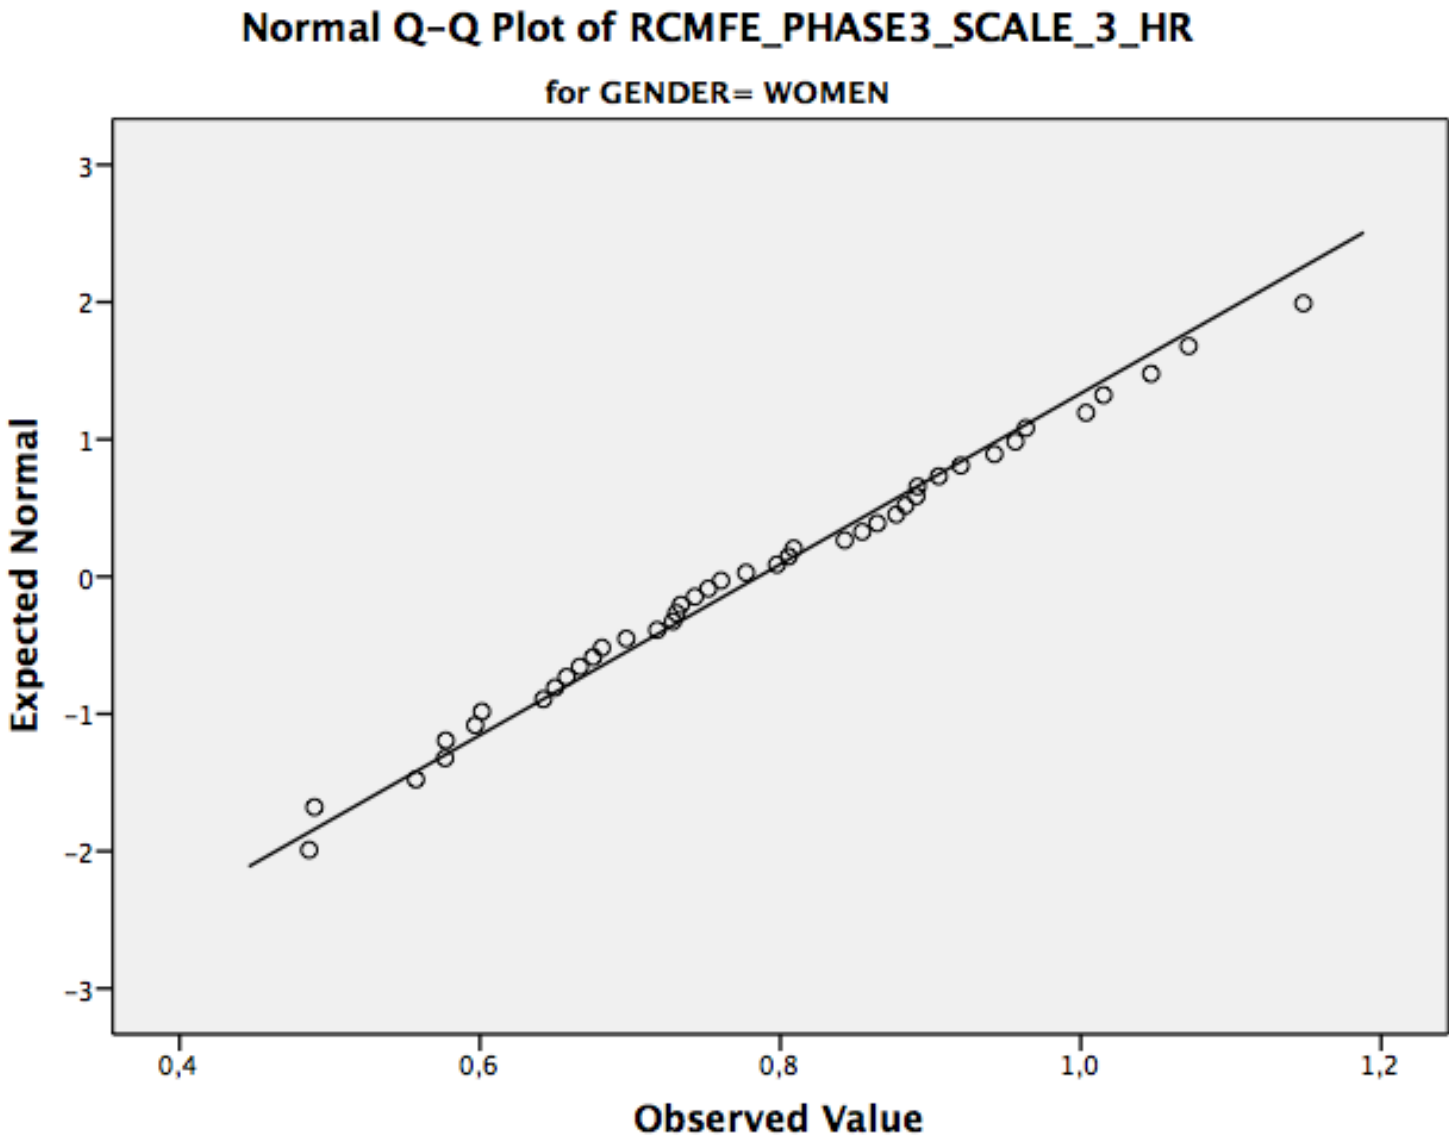

# Normal Q-Q Plot of RCMFE\_PHASE3\_SCALE\_3\_HR

for GENDER= MEN

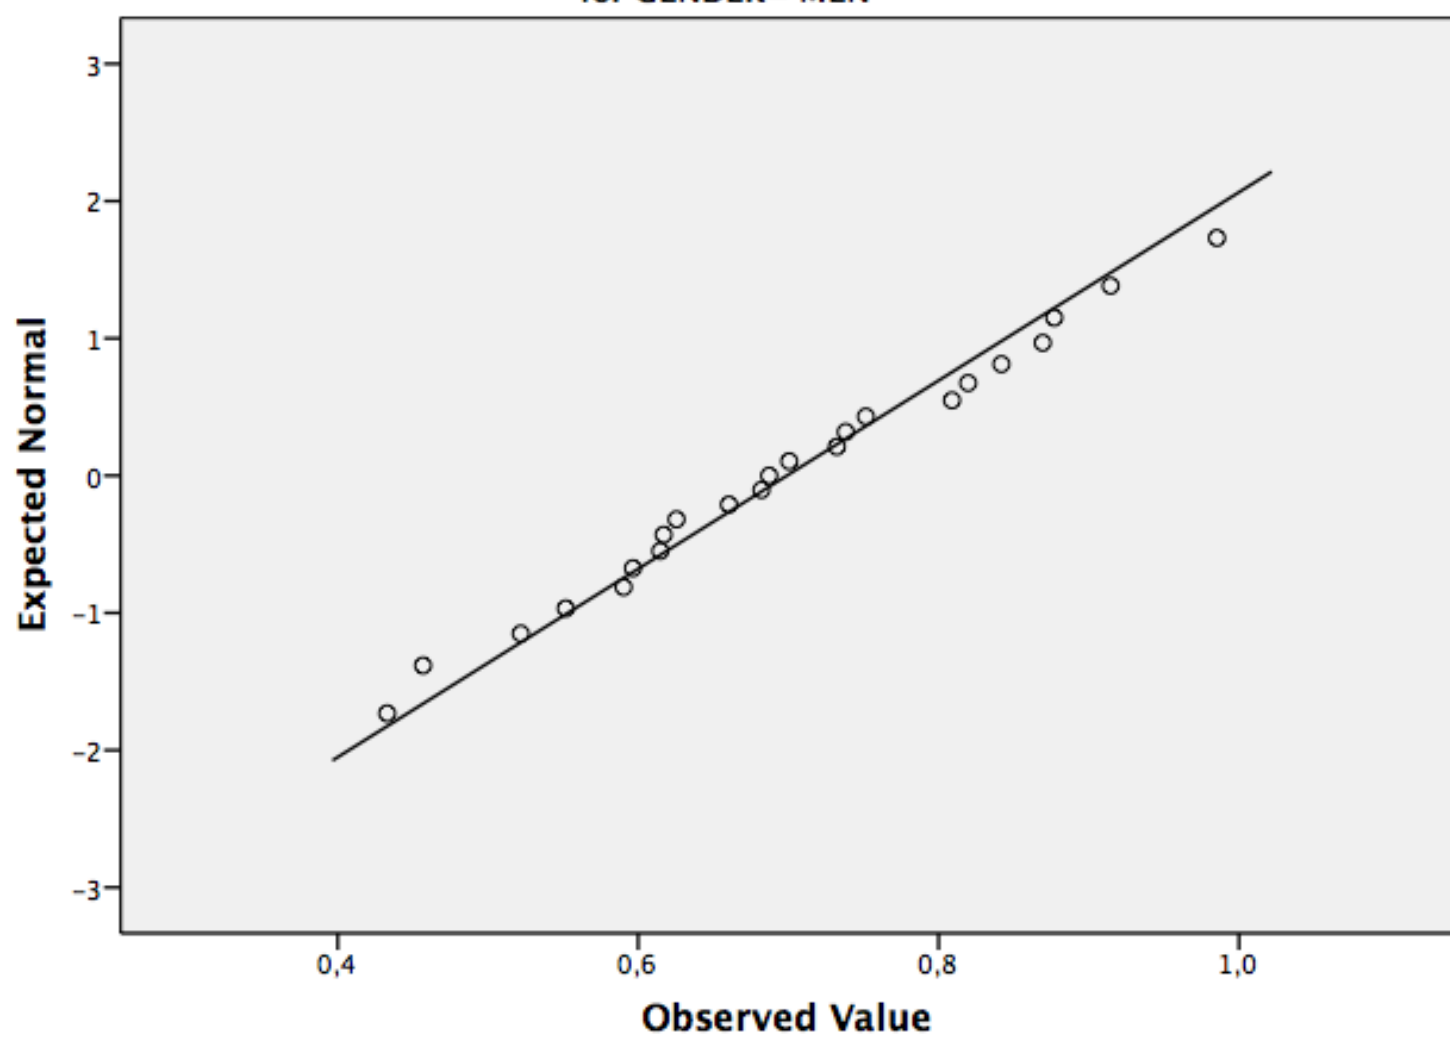

Normal Q-Q Plots

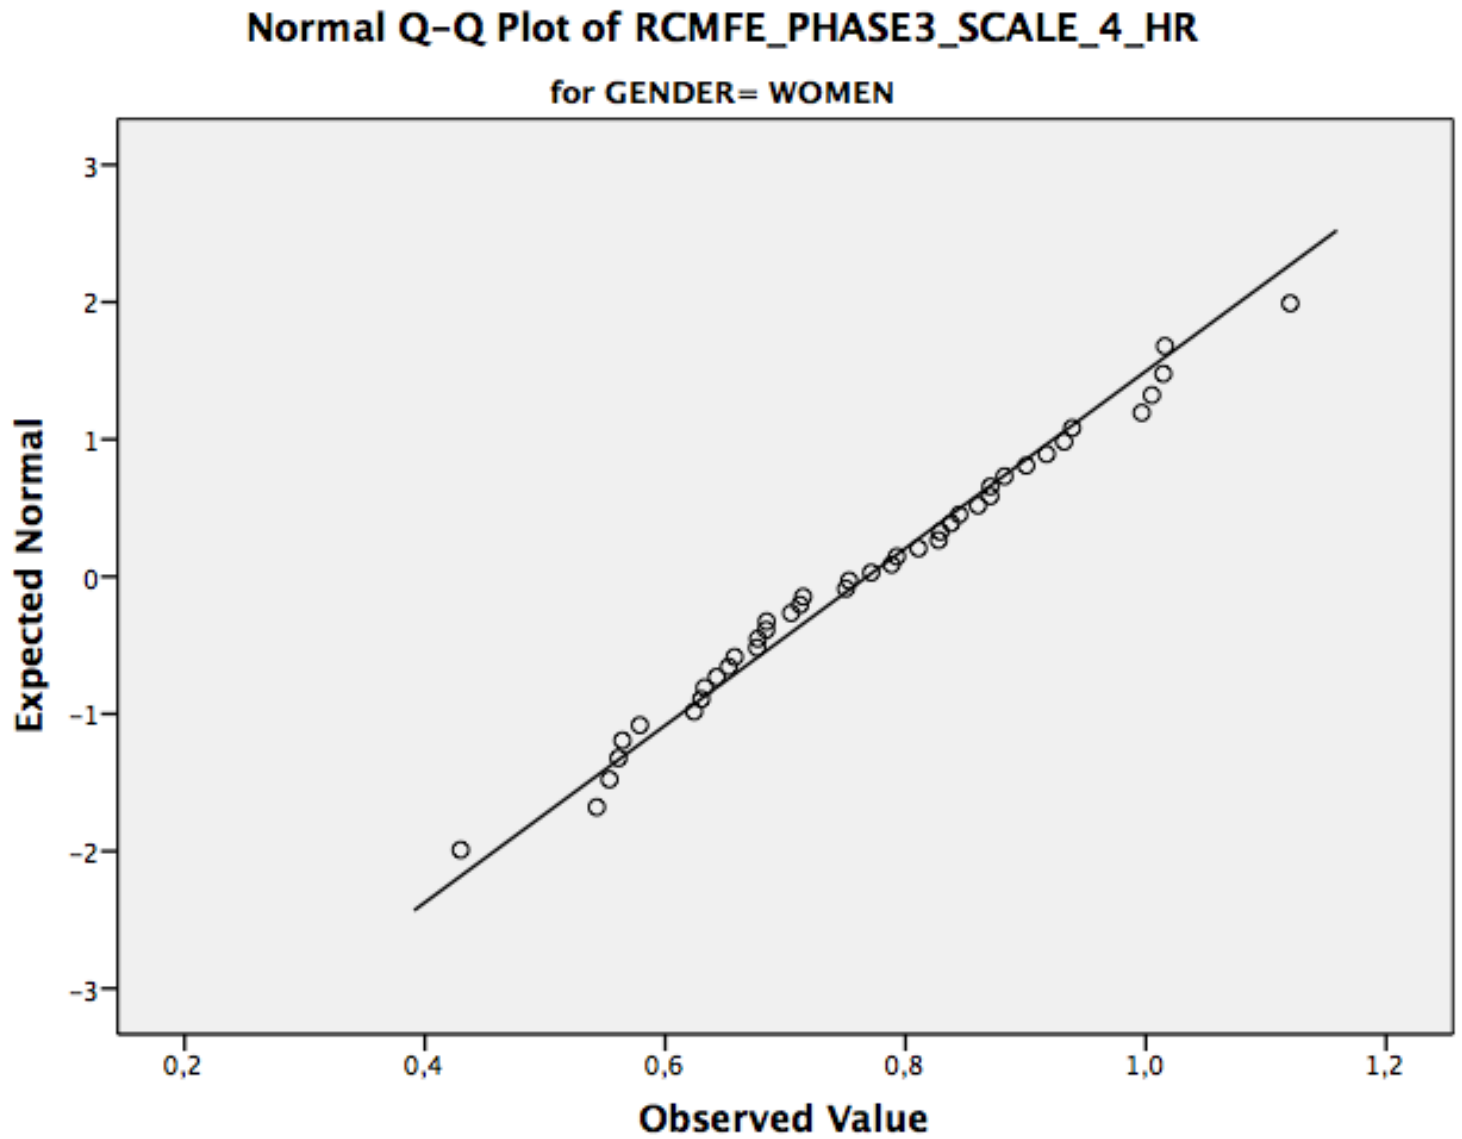



# Normal Q-Q Plot of RCMFE\_PHASE3\_SCALE\_4\_HR

for GENDER= MEN

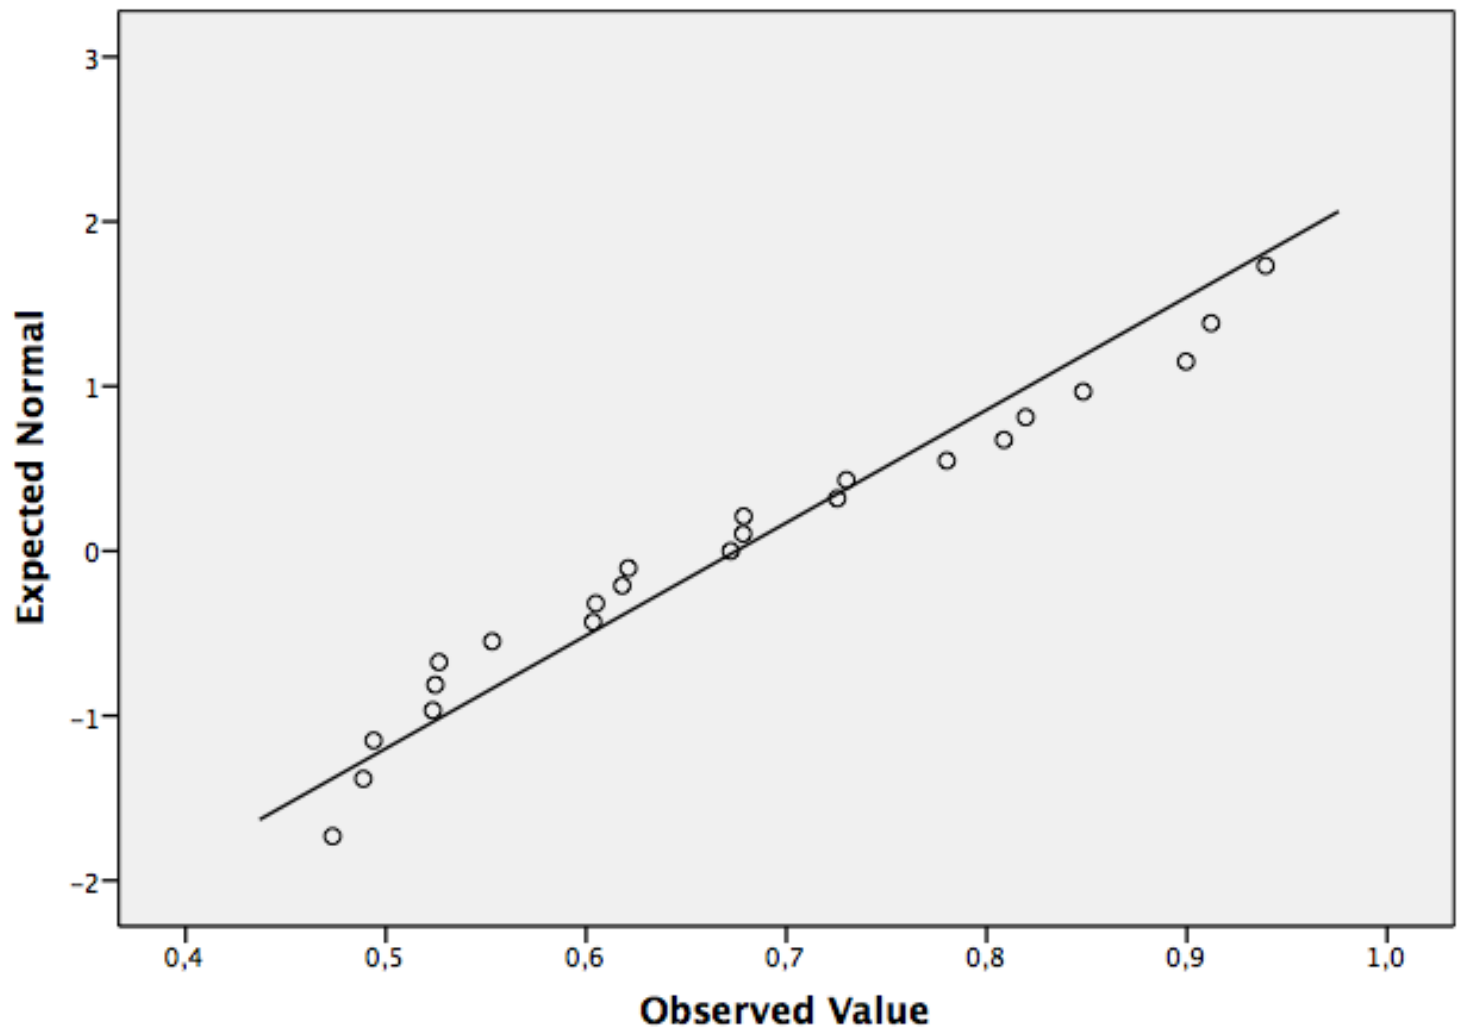

Normal Q-Q Plots

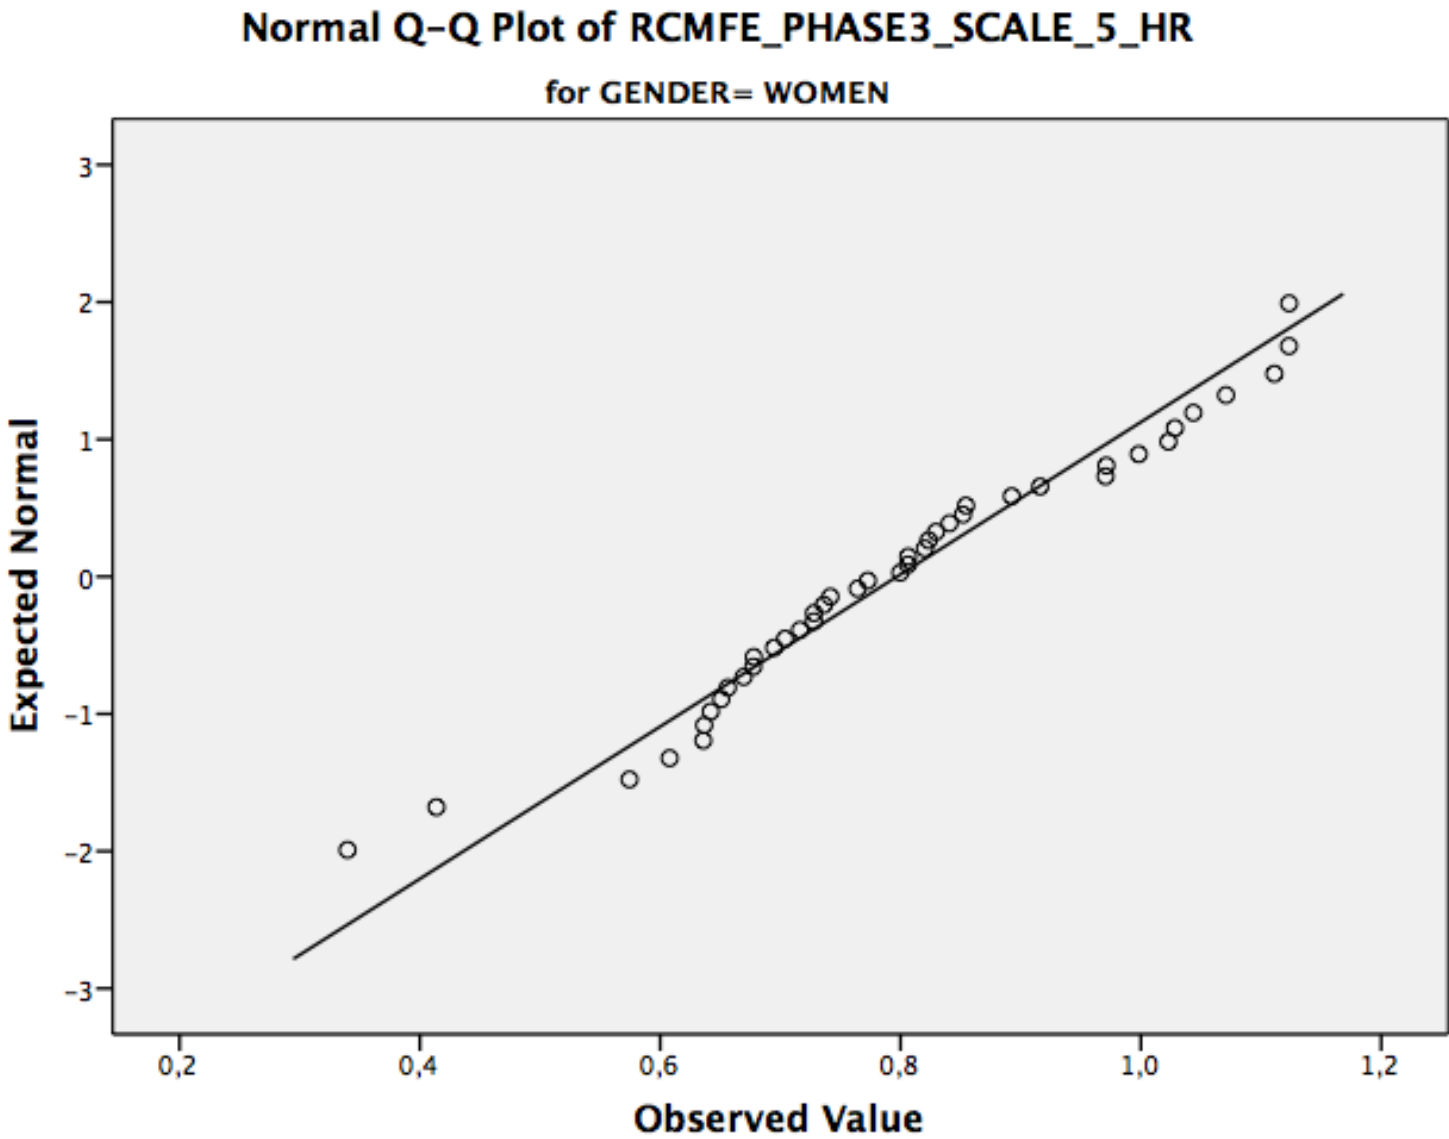

# Normal Q-Q Plot of RCMFE\_PHASE3\_SCALE\_5\_HR

for GENDER= MEN

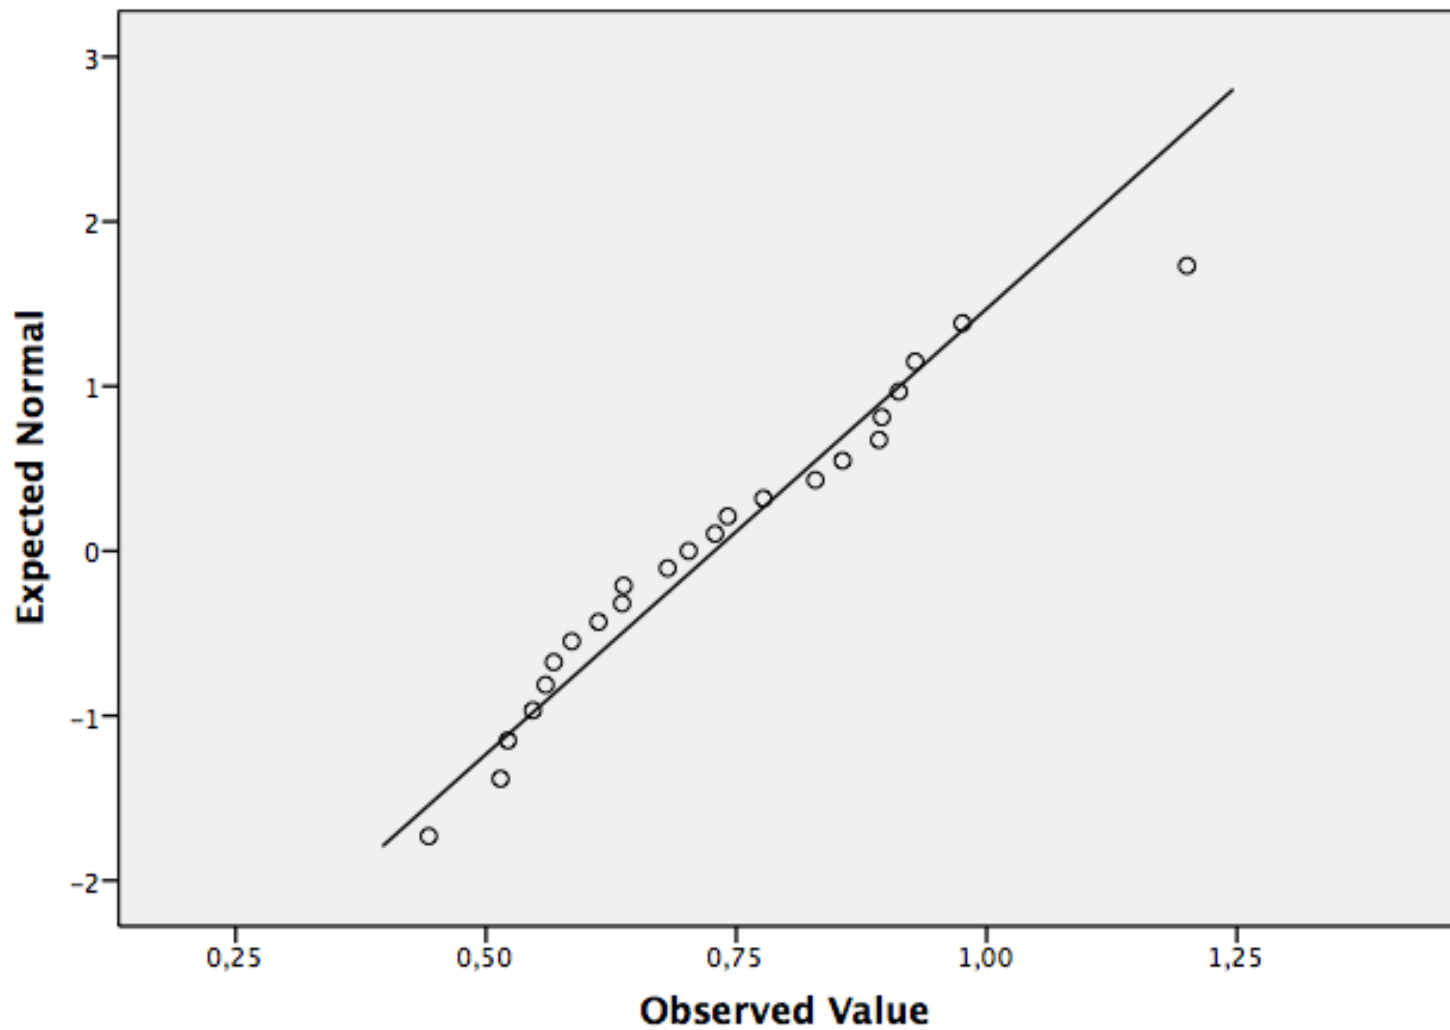

Normal Q-Q Plots

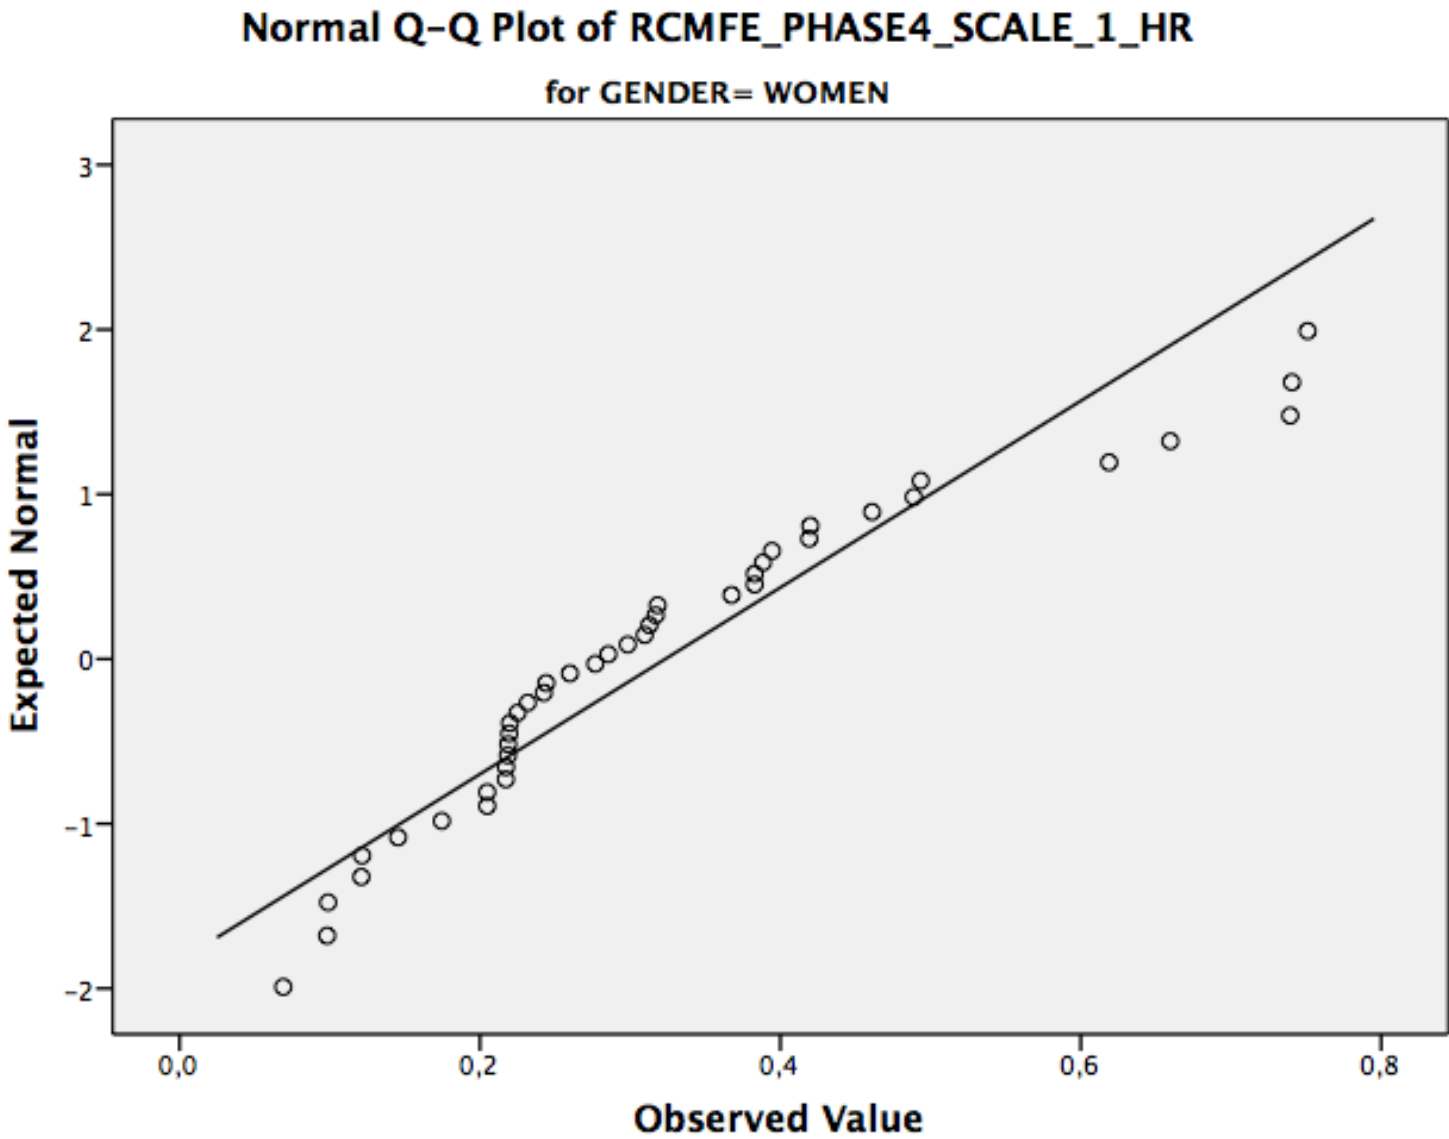

# Normal Q-Q Plot of RCMFE\_PHASE4\_SCALE\_1\_HR

for GENDER= MEN

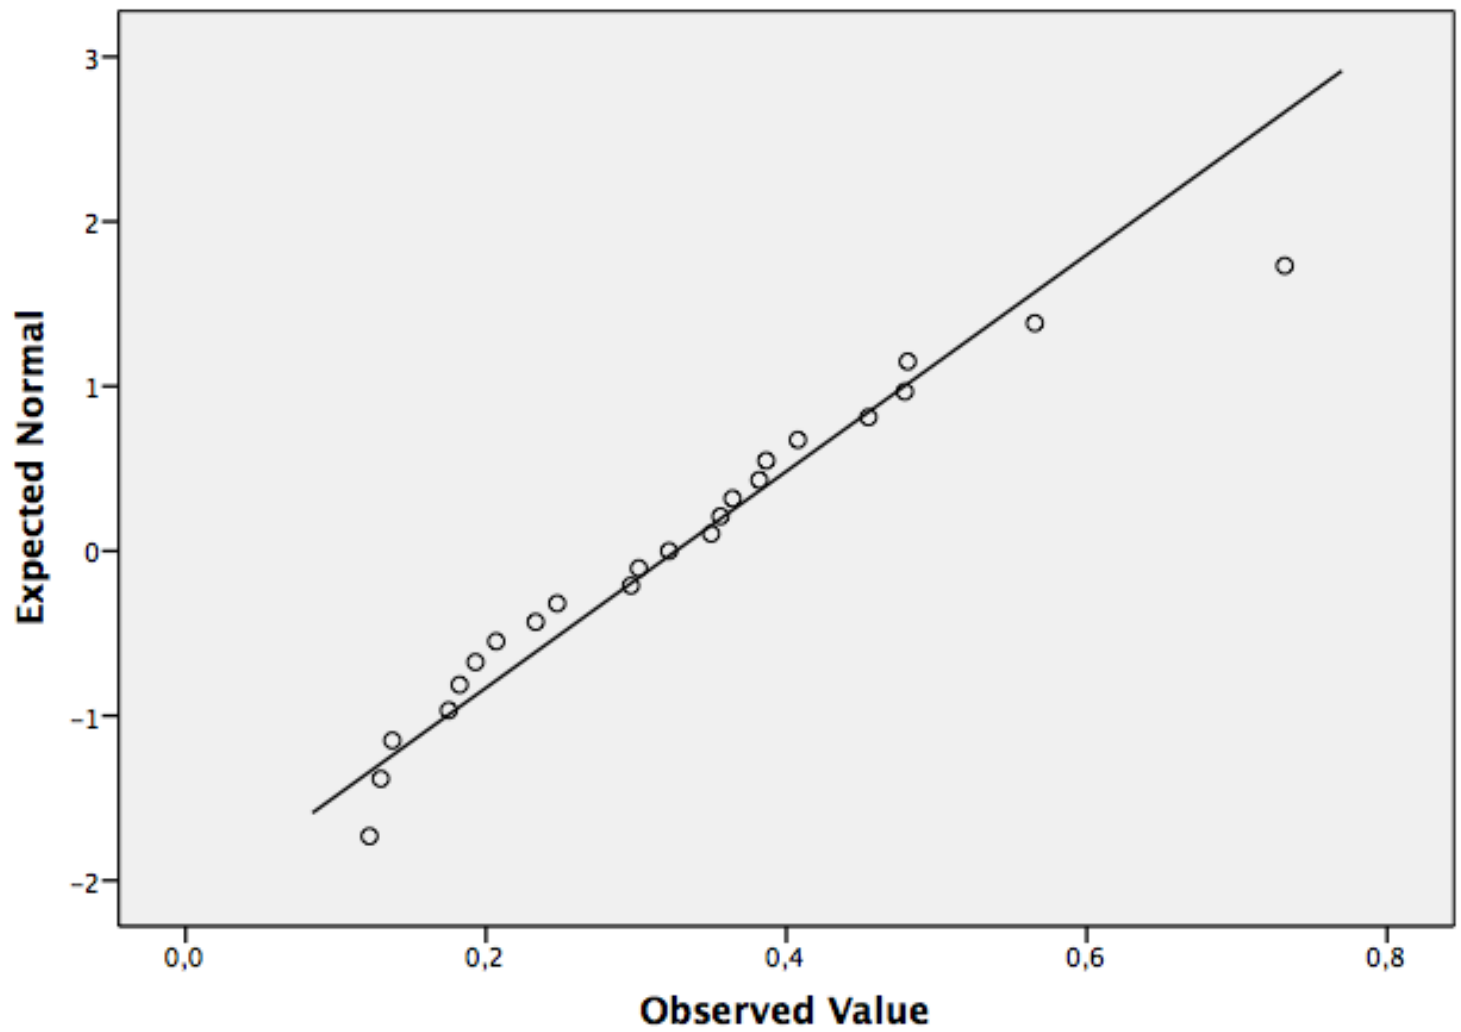

Normal Q-Q Plots

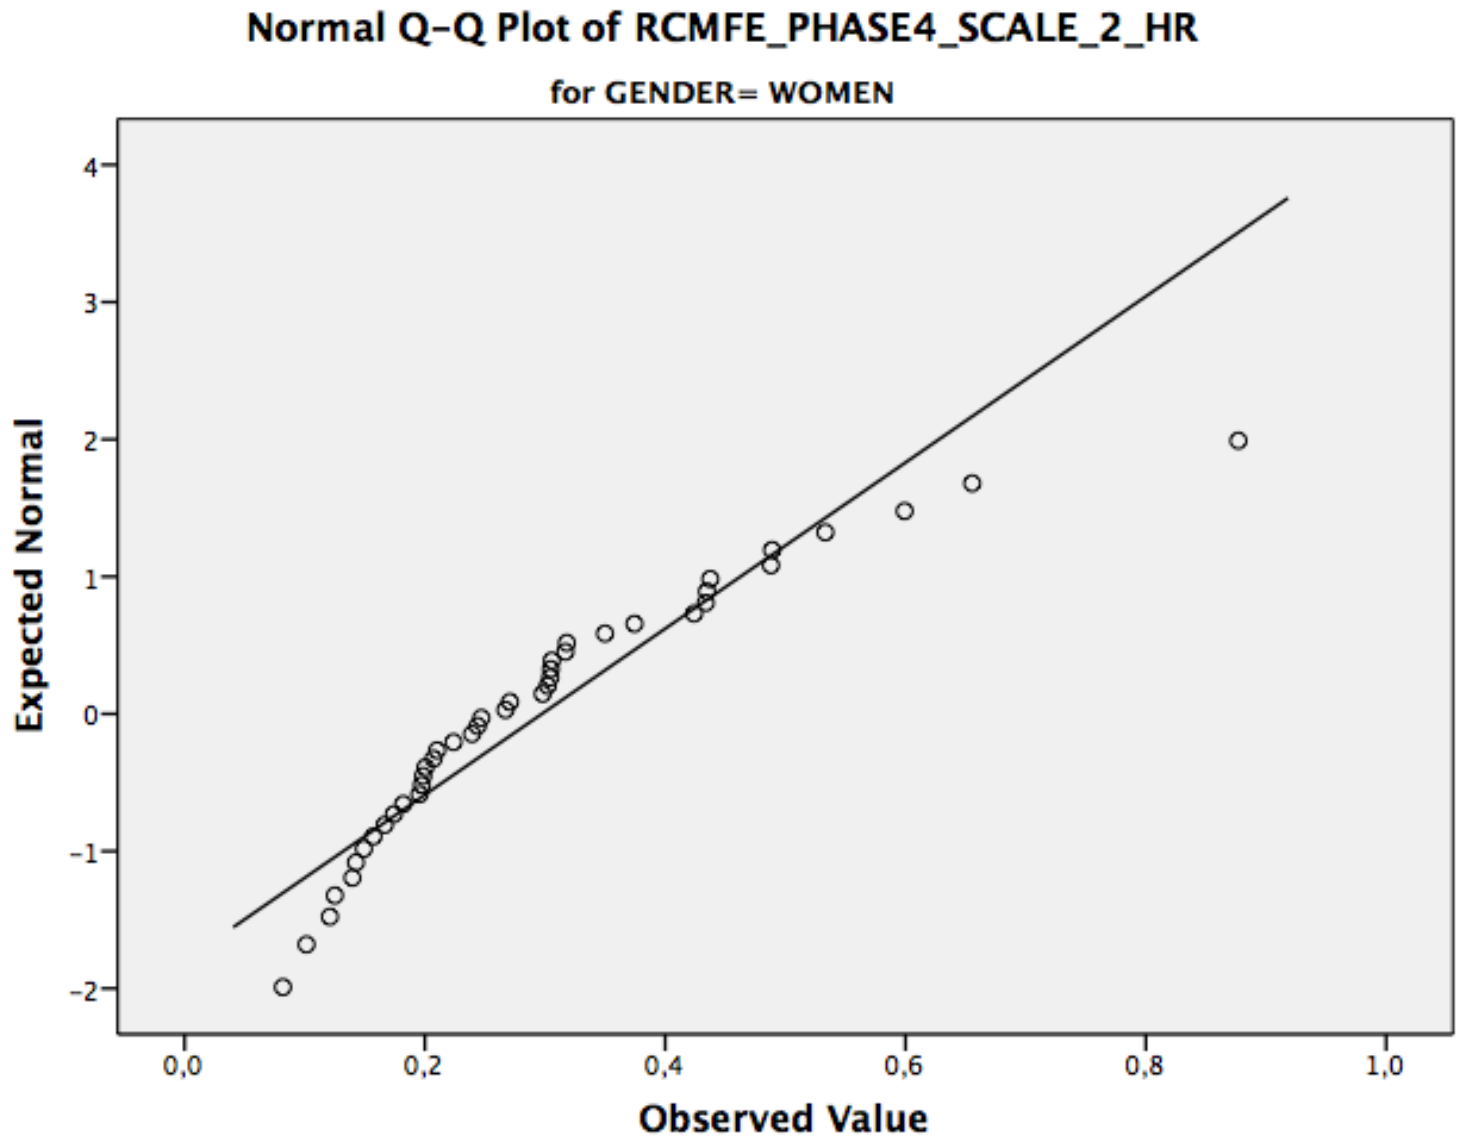

# Normal Q-Q Plot of RCMFE\_PHASE4\_SCALE\_2\_HR

for GENDER= MEN

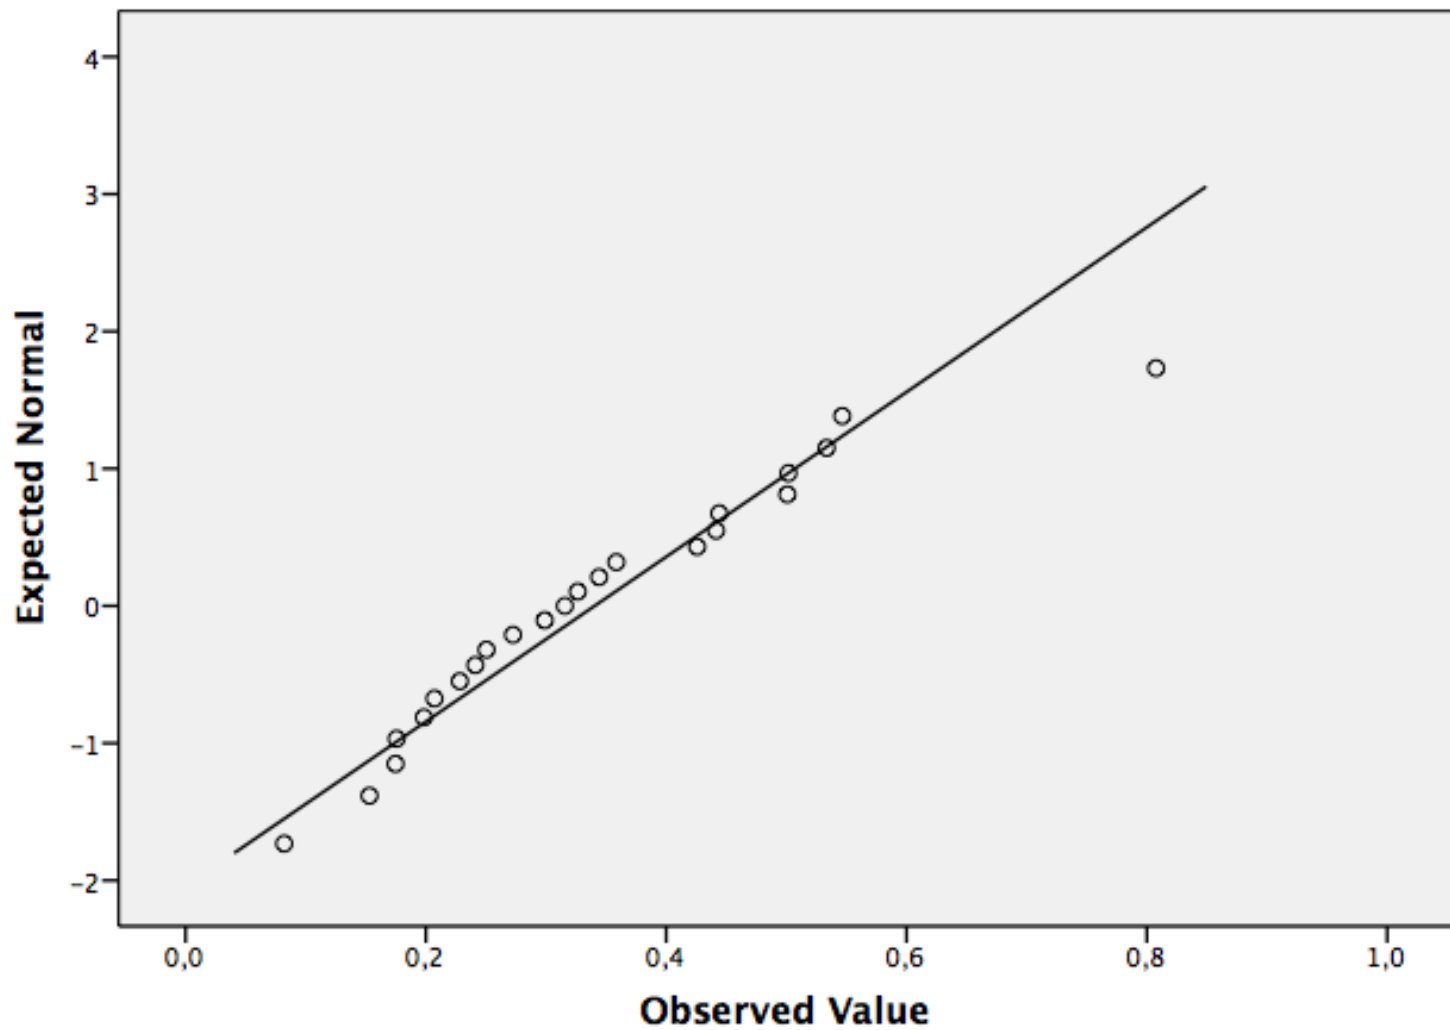

Normal Q-Q Plots

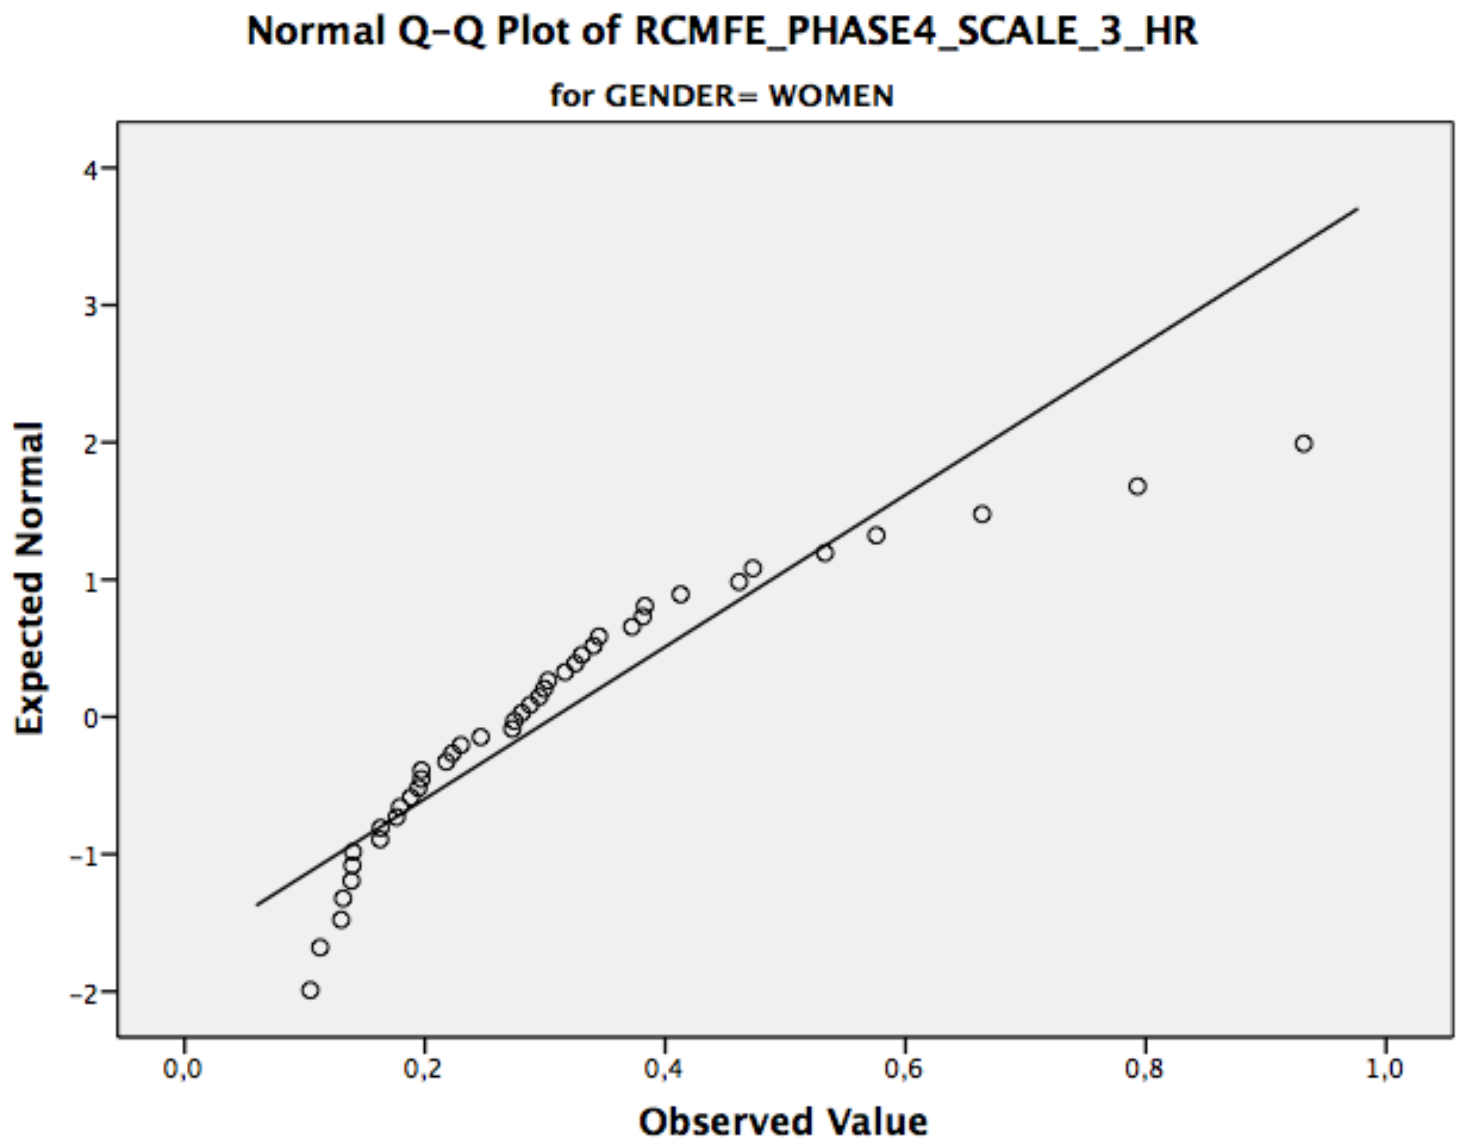



# Normal Q-Q Plot of RCMFE\_PHASE4\_SCALE\_3\_HR

for GENDER= MEN

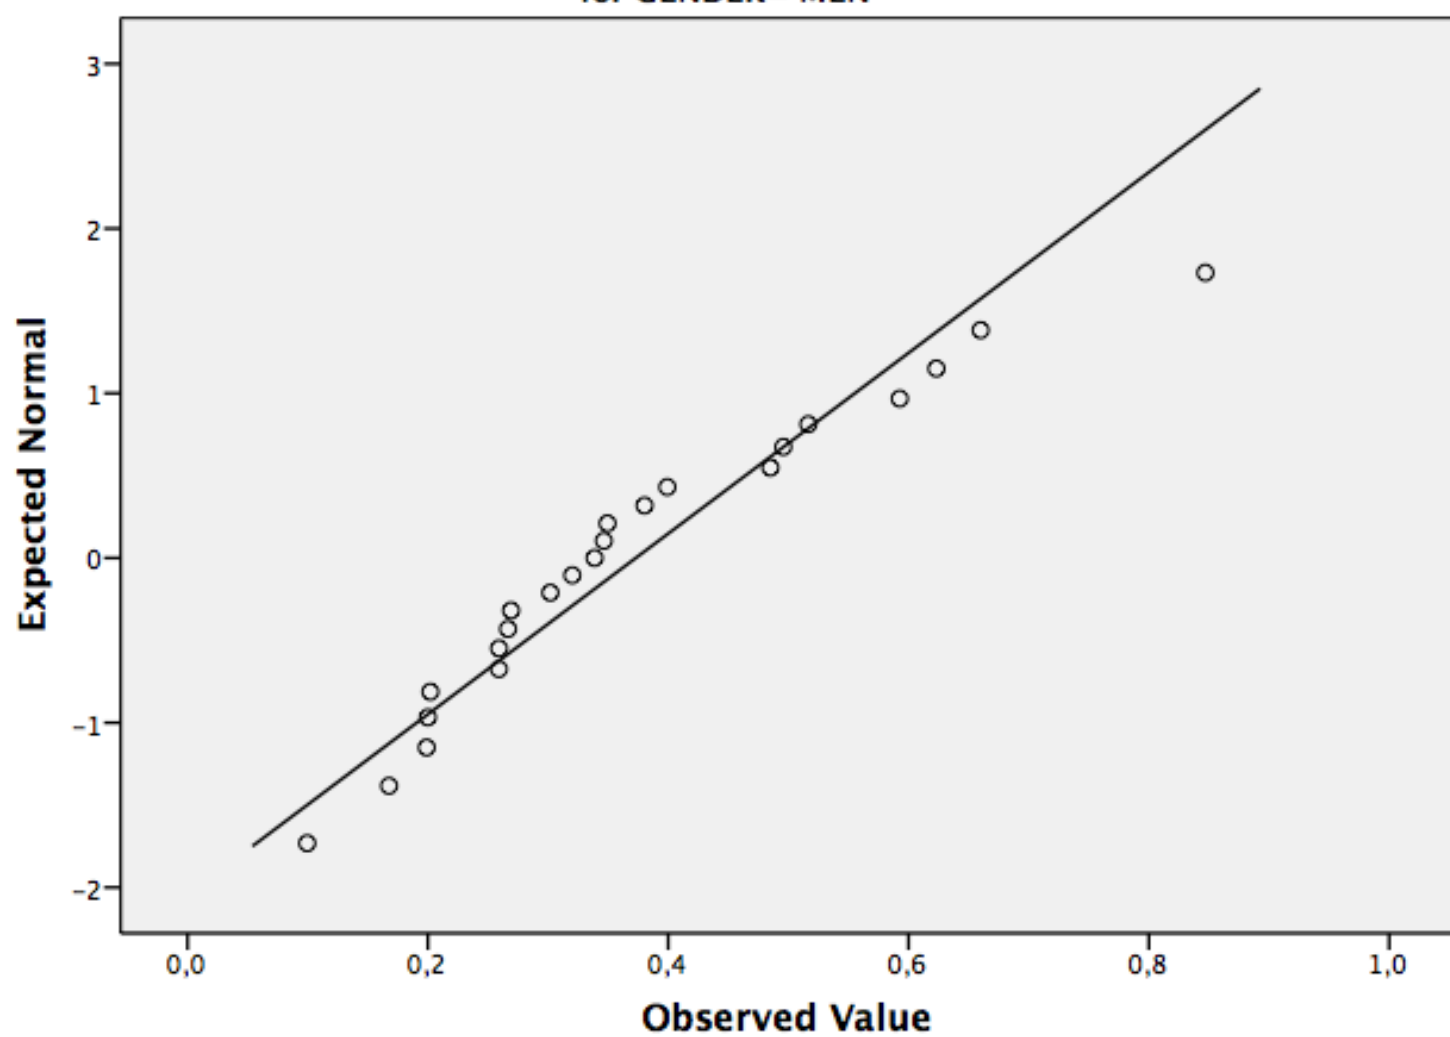

Normal Q-Q Plots

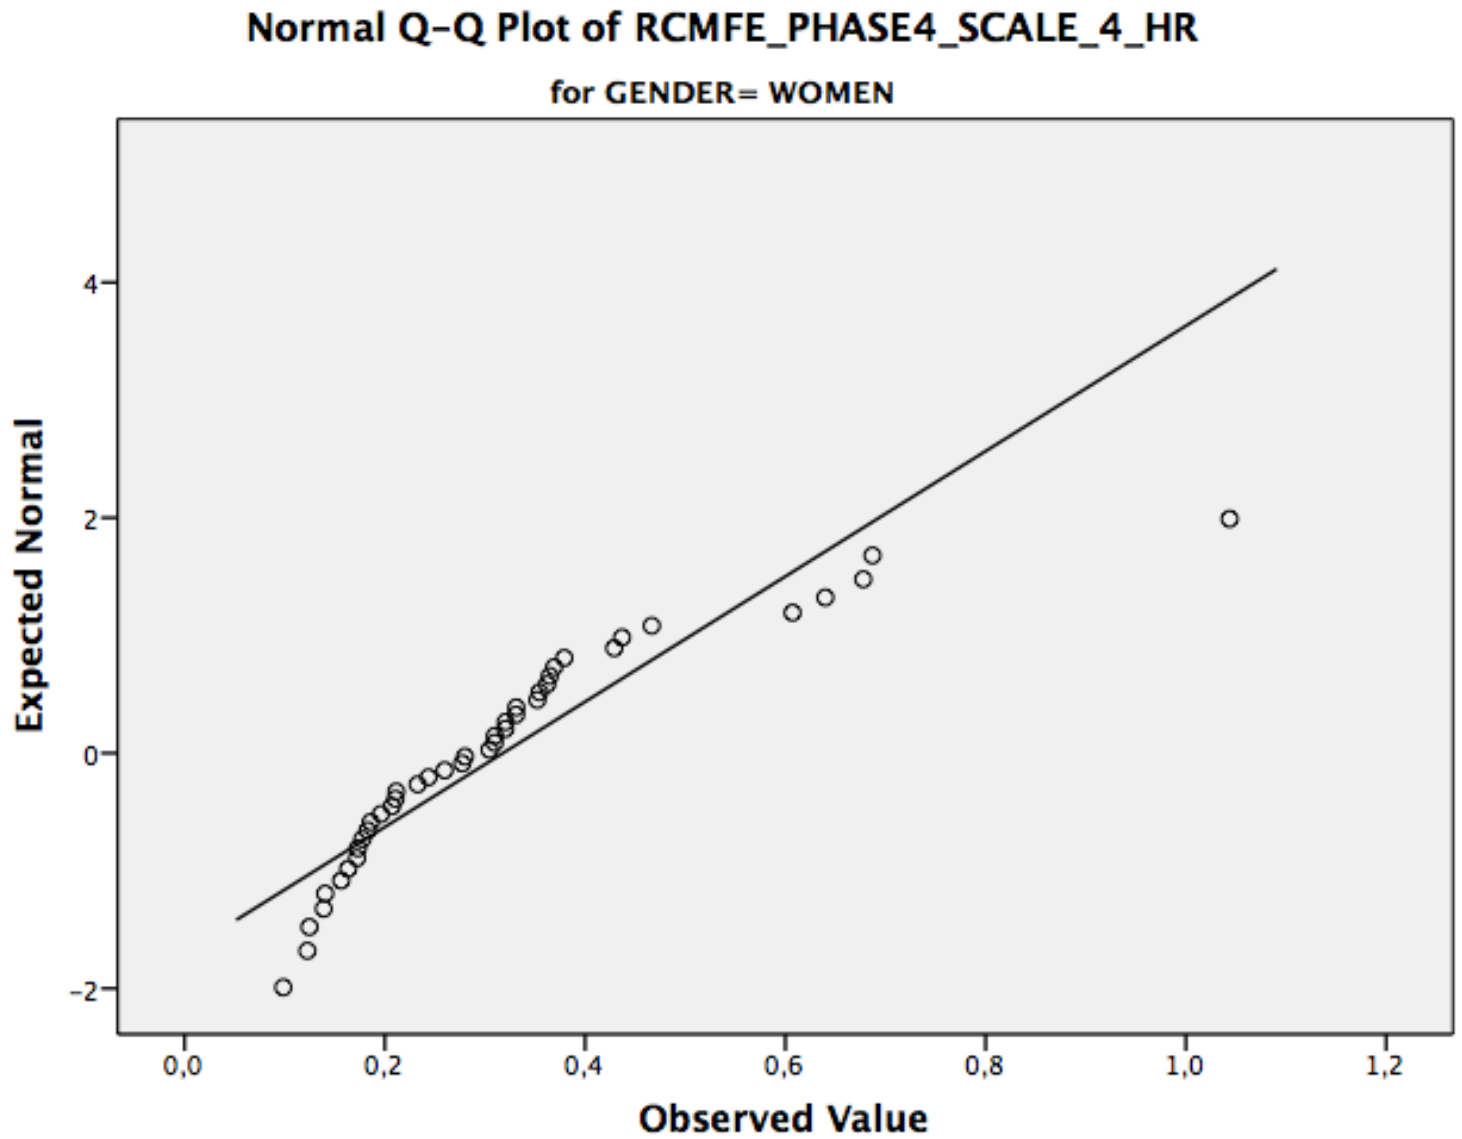

# Normal Q-Q Plot of RCMFE\_PHASE4\_SCALE\_4\_HR

for GENDER= MEN

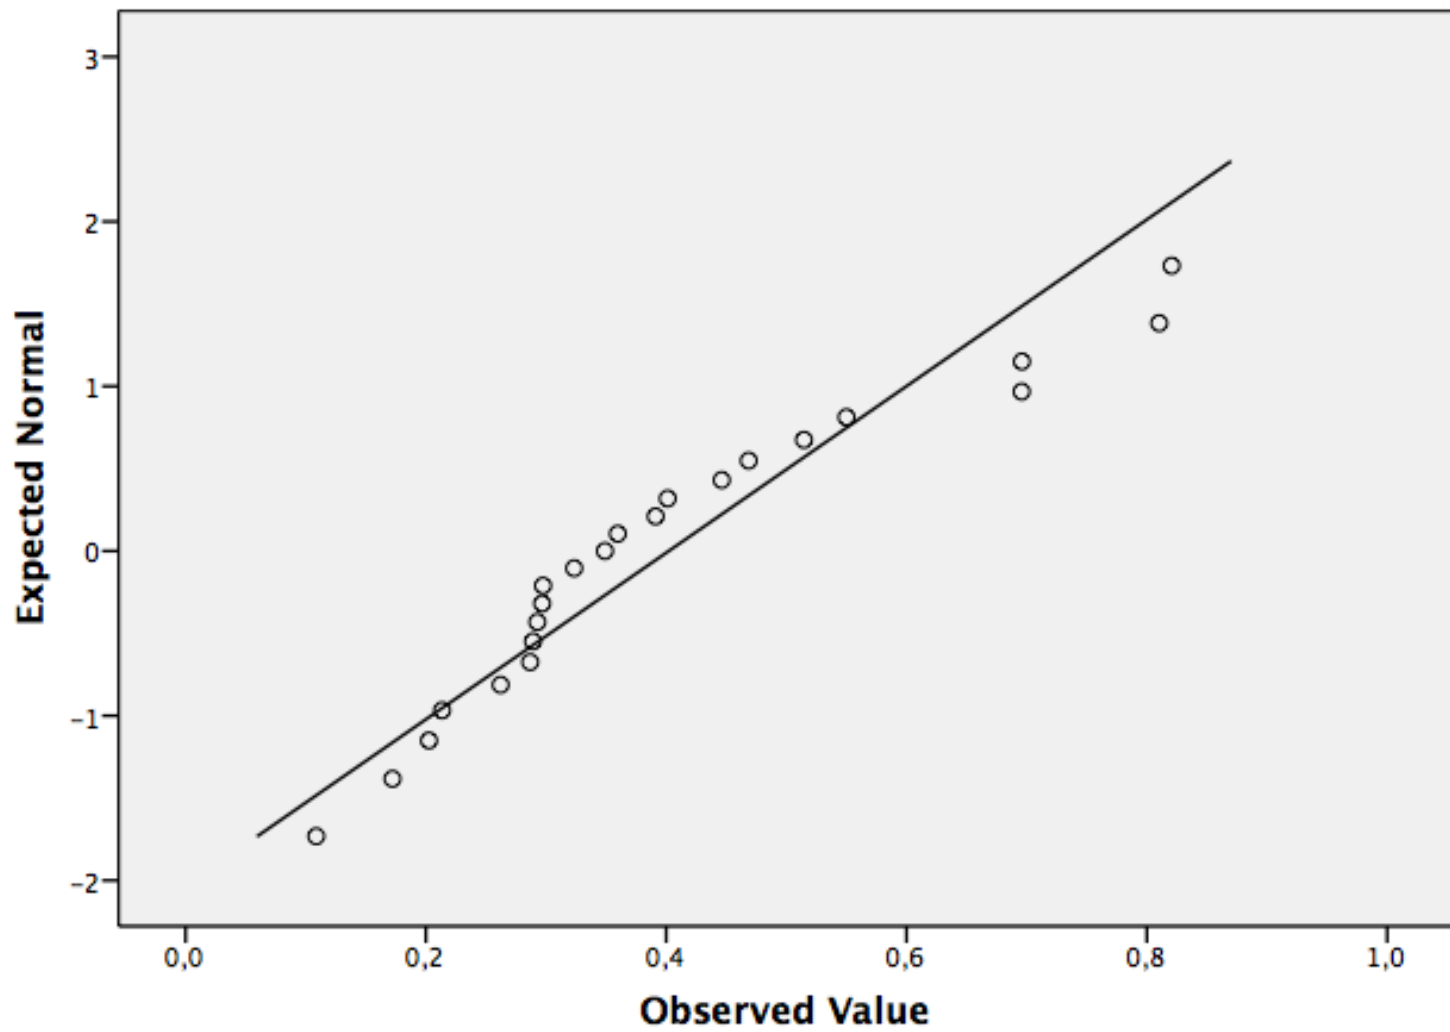

Normal Q-Q Plots

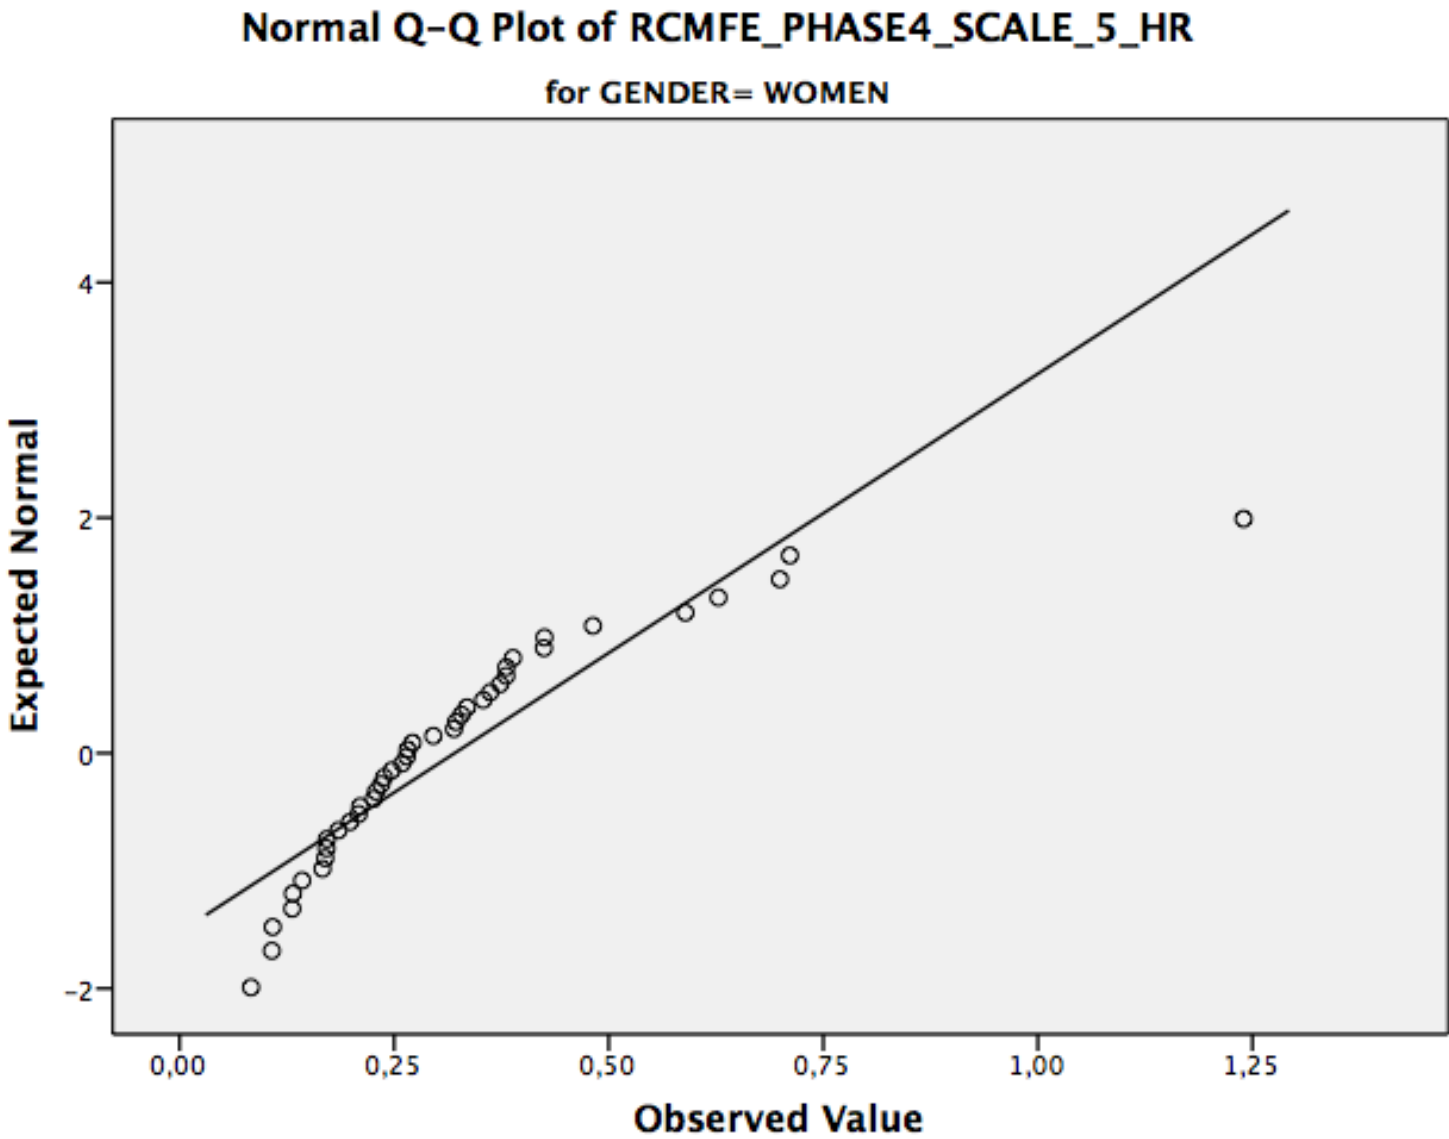

# Normal Q-Q Plot of RCMFE\_PHASE4\_SCALE\_5\_HR

for GENDER= MEN

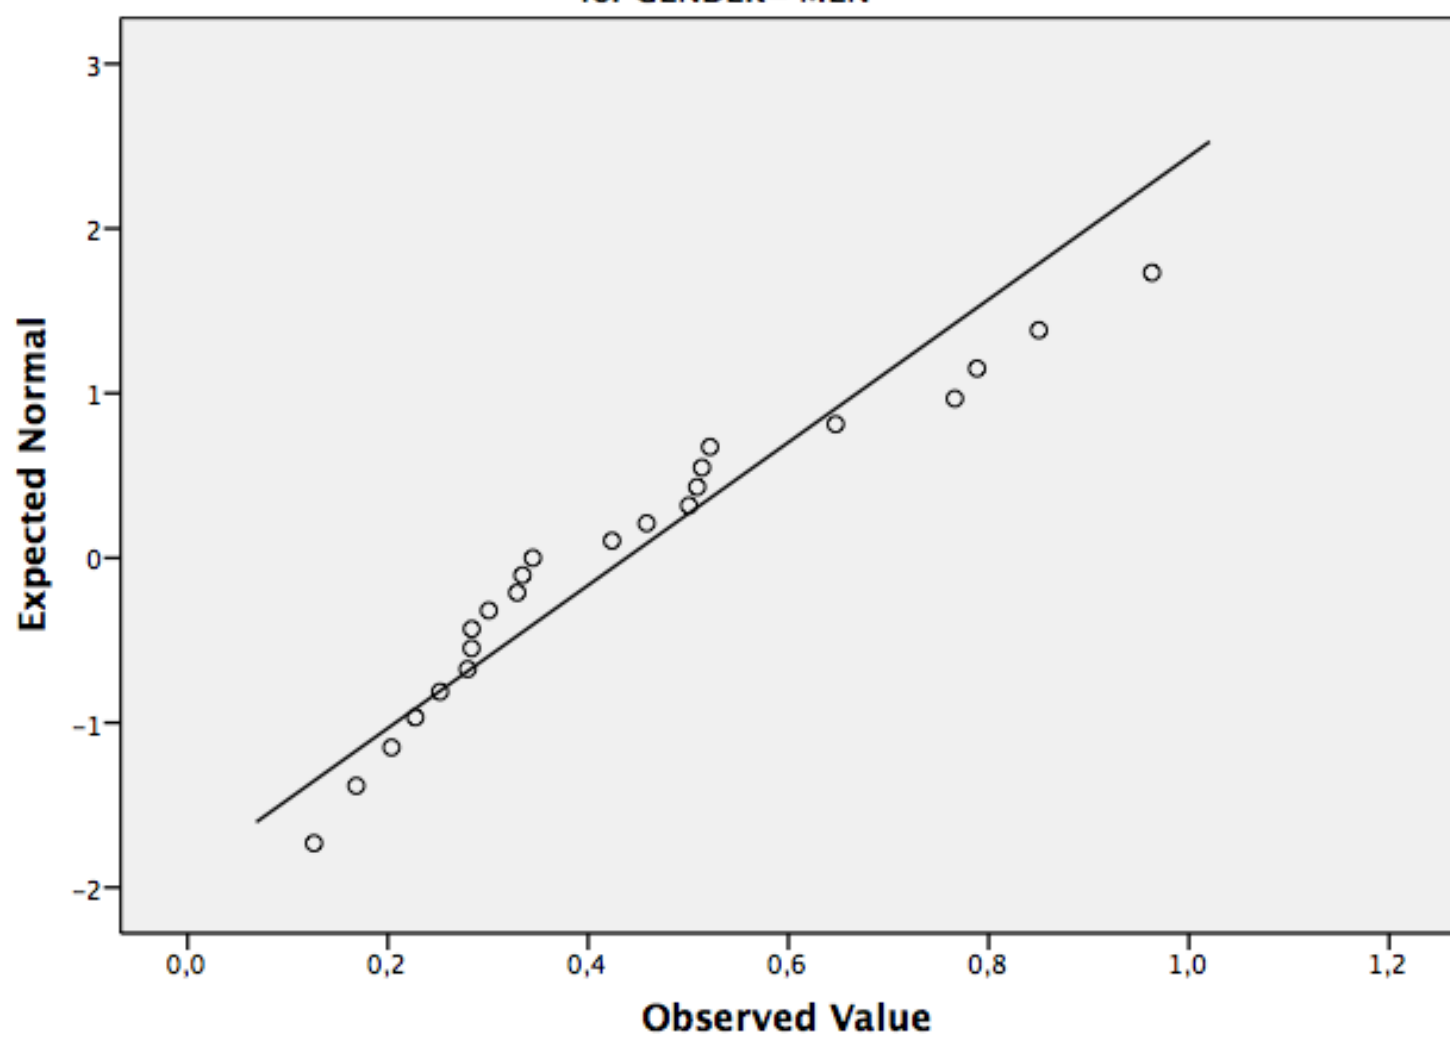

Normal Q-Q Plots

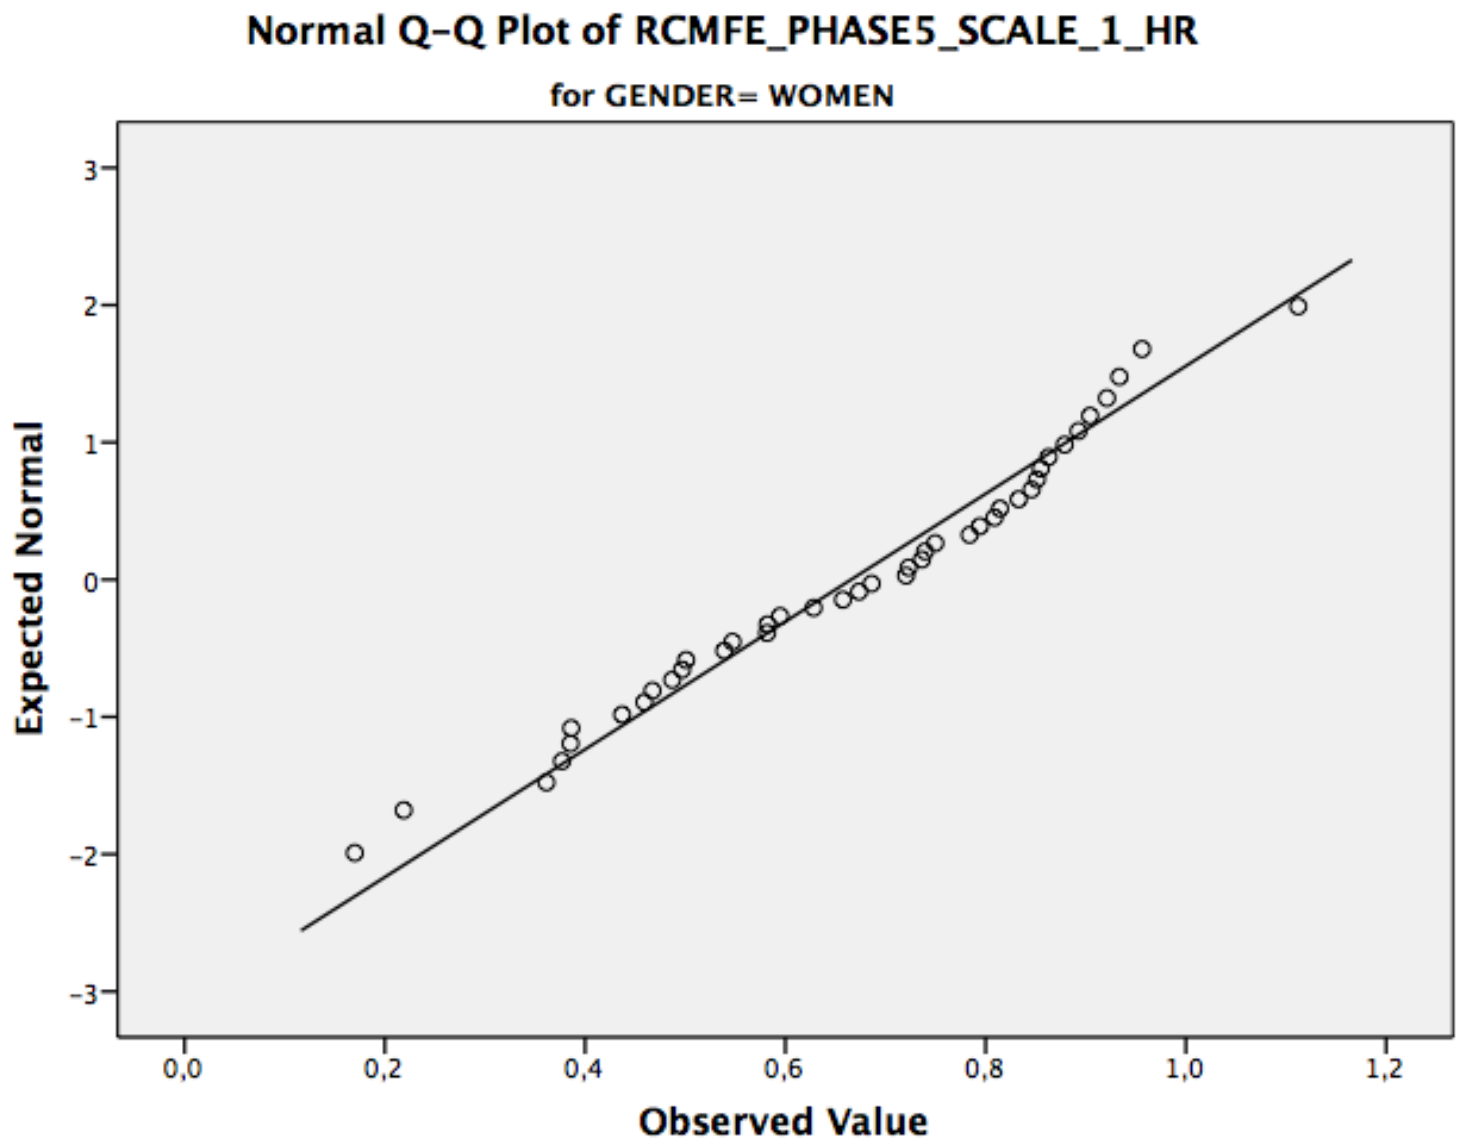

# Normal Q-Q Plot of RCMFE\_PHASE5\_SCALE\_1\_HR

for GENDER= MEN

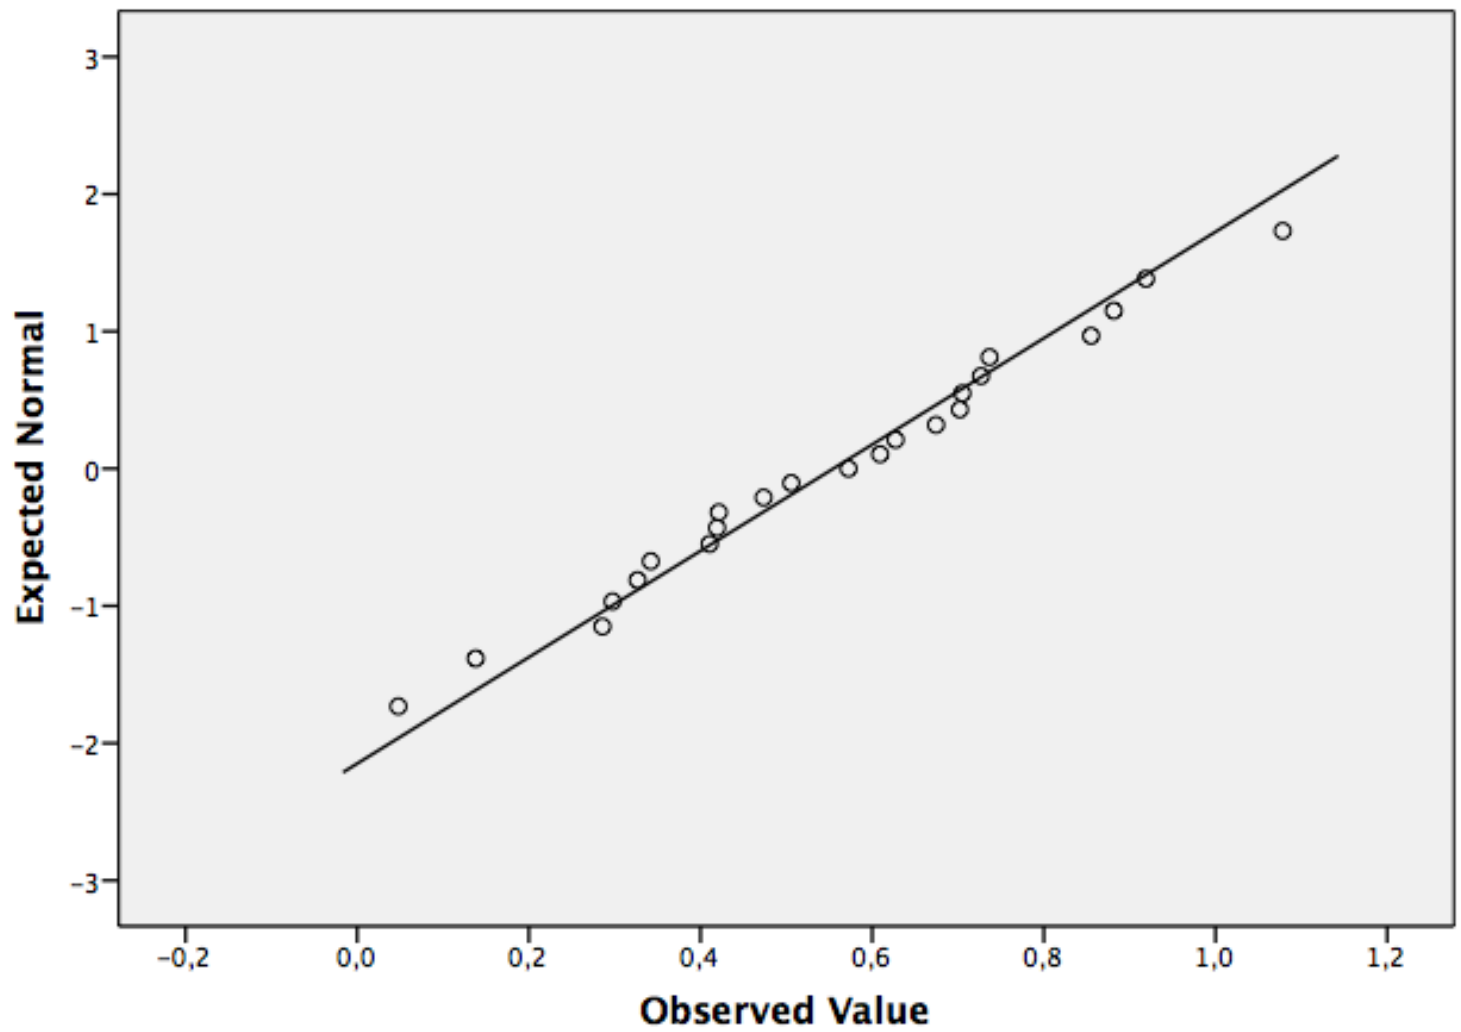

Normal Q-Q Plots

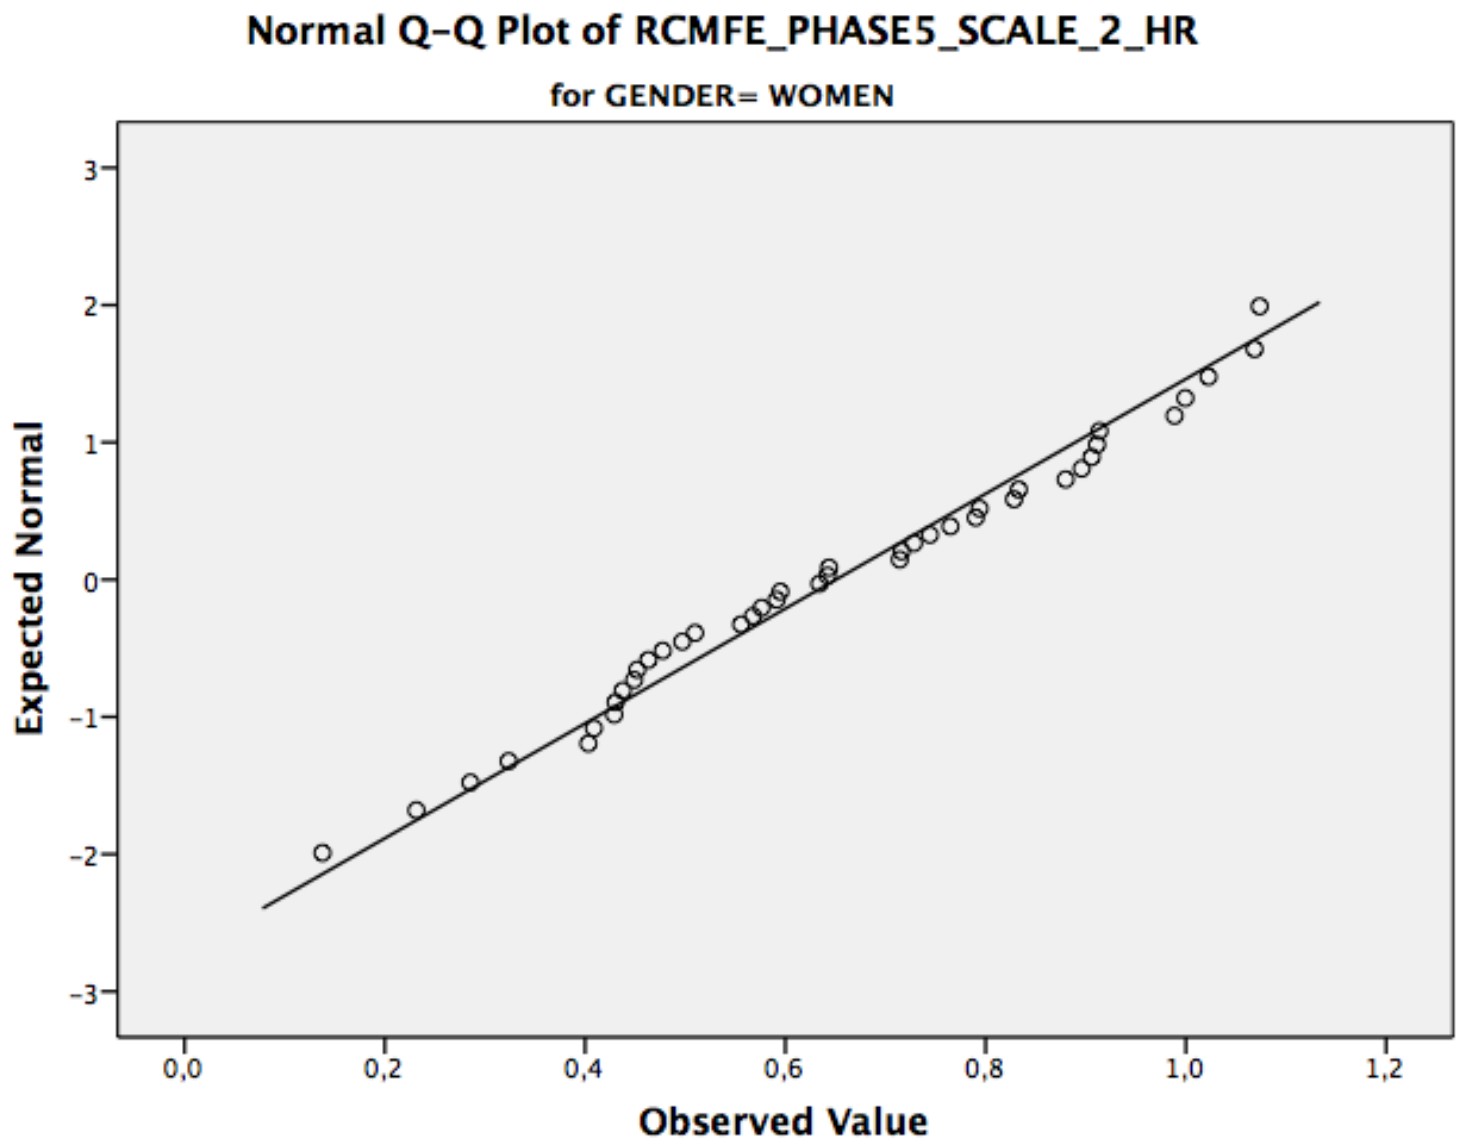



# Normal Q-Q Plot of RCMFE\_PHASE5\_SCALE\_2\_HR

for GENDER= MEN

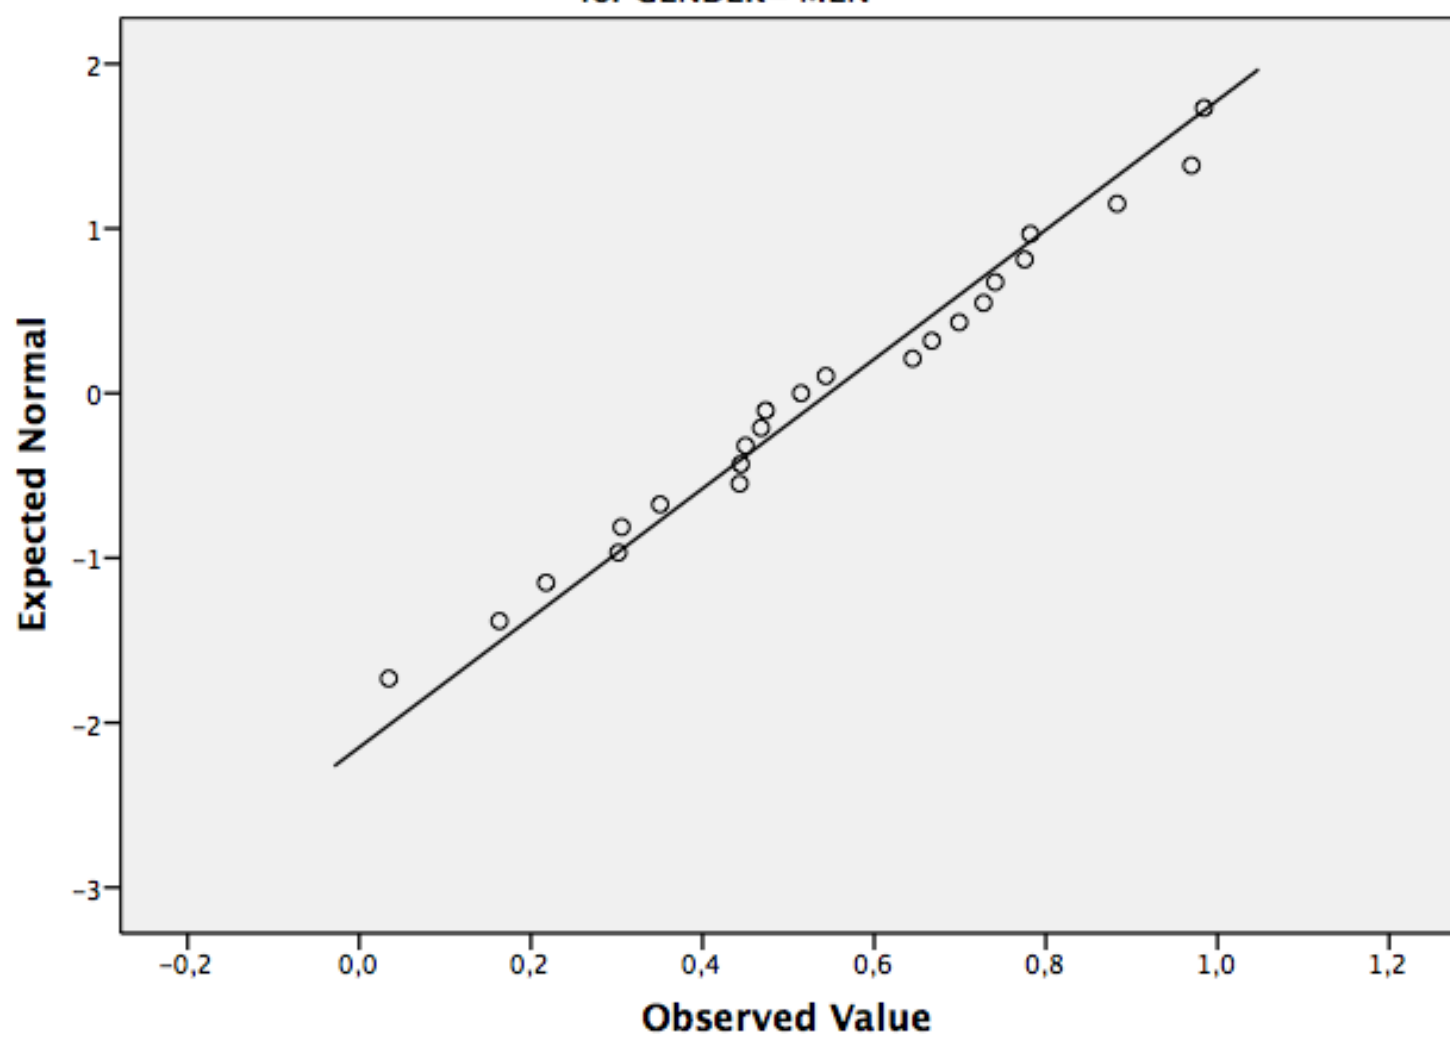

Normal Q-Q Plots

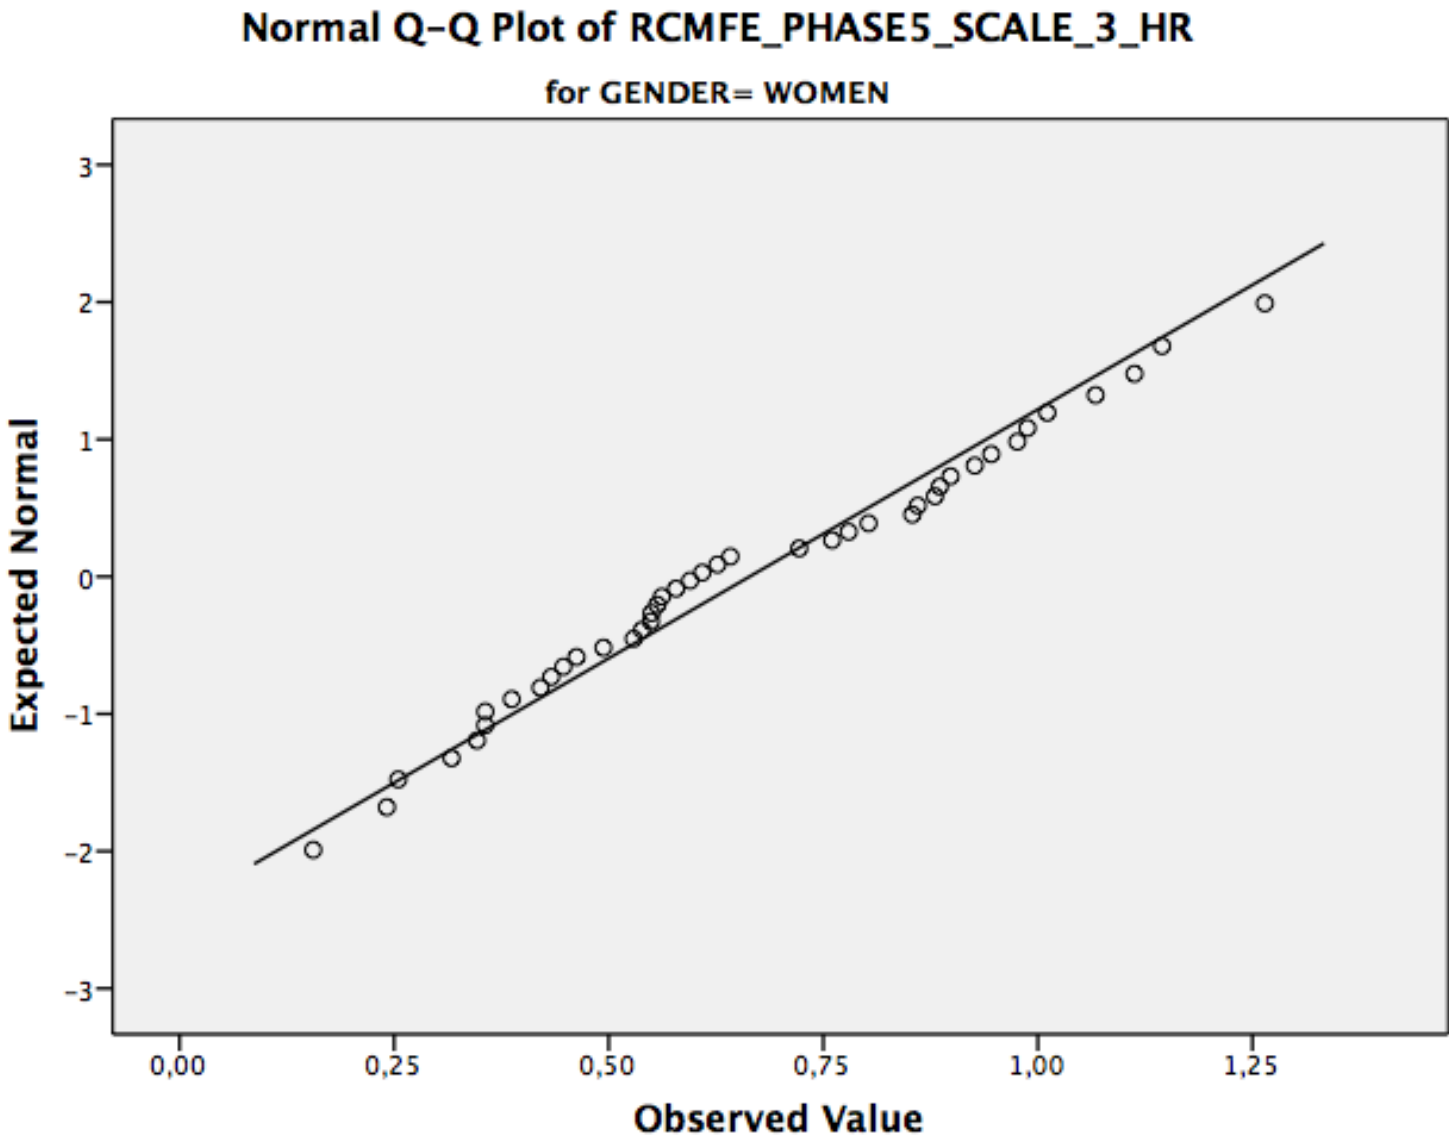

# Normal Q-Q Plot of RCMFE\_PHASE5\_SCALE\_3\_HR

for GENDER= MEN

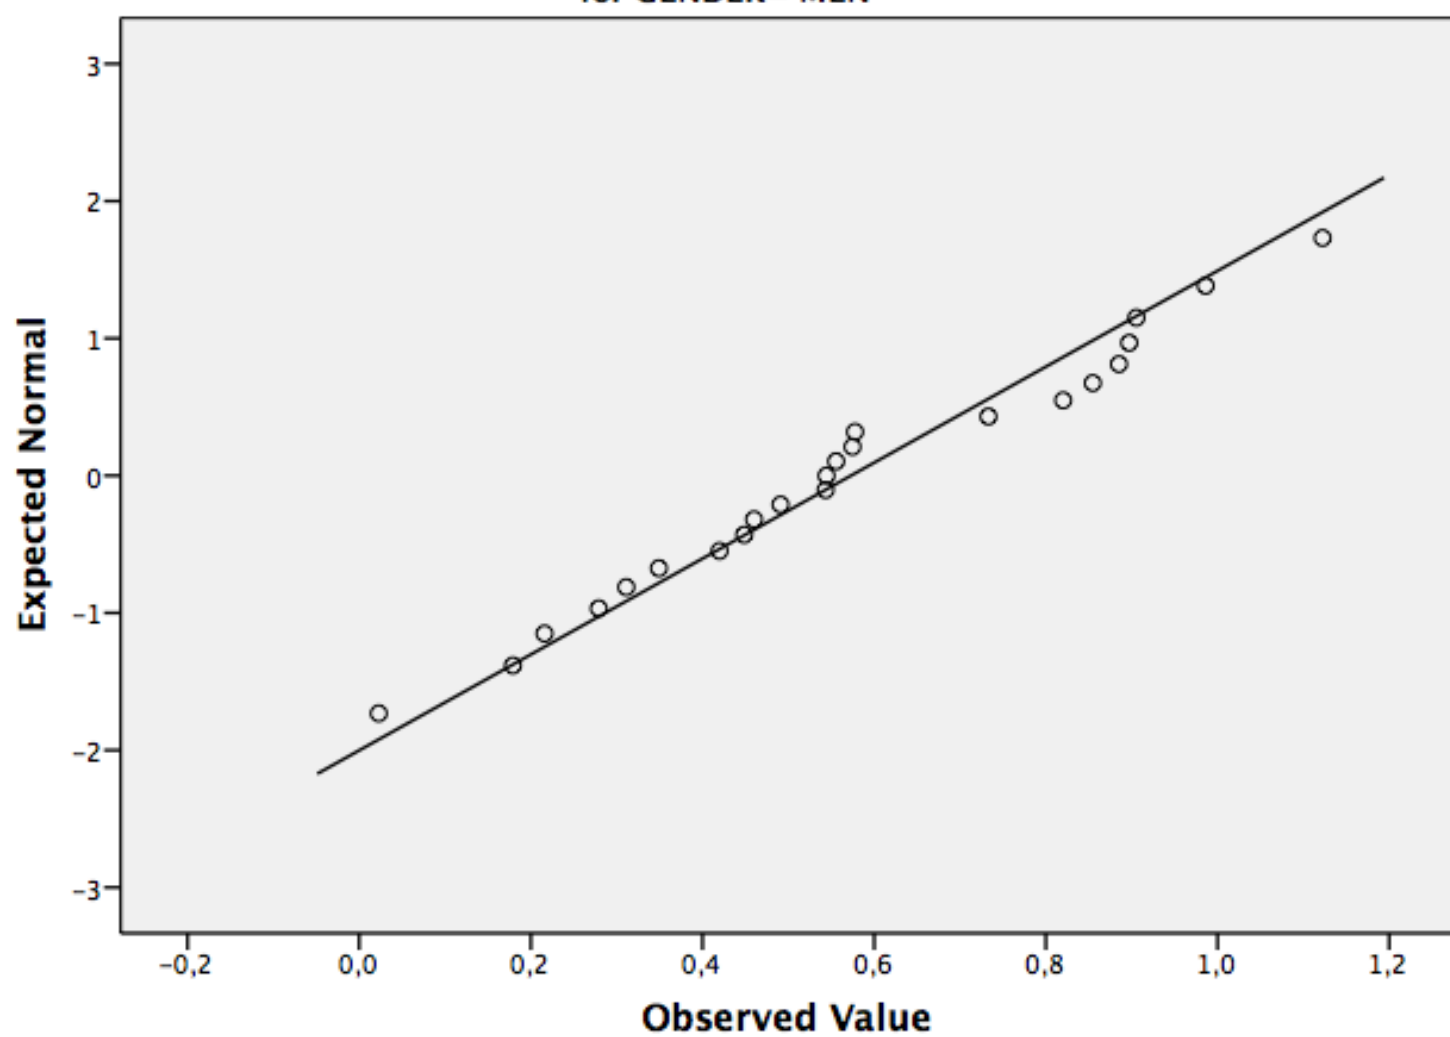

Normal Q-Q Plots

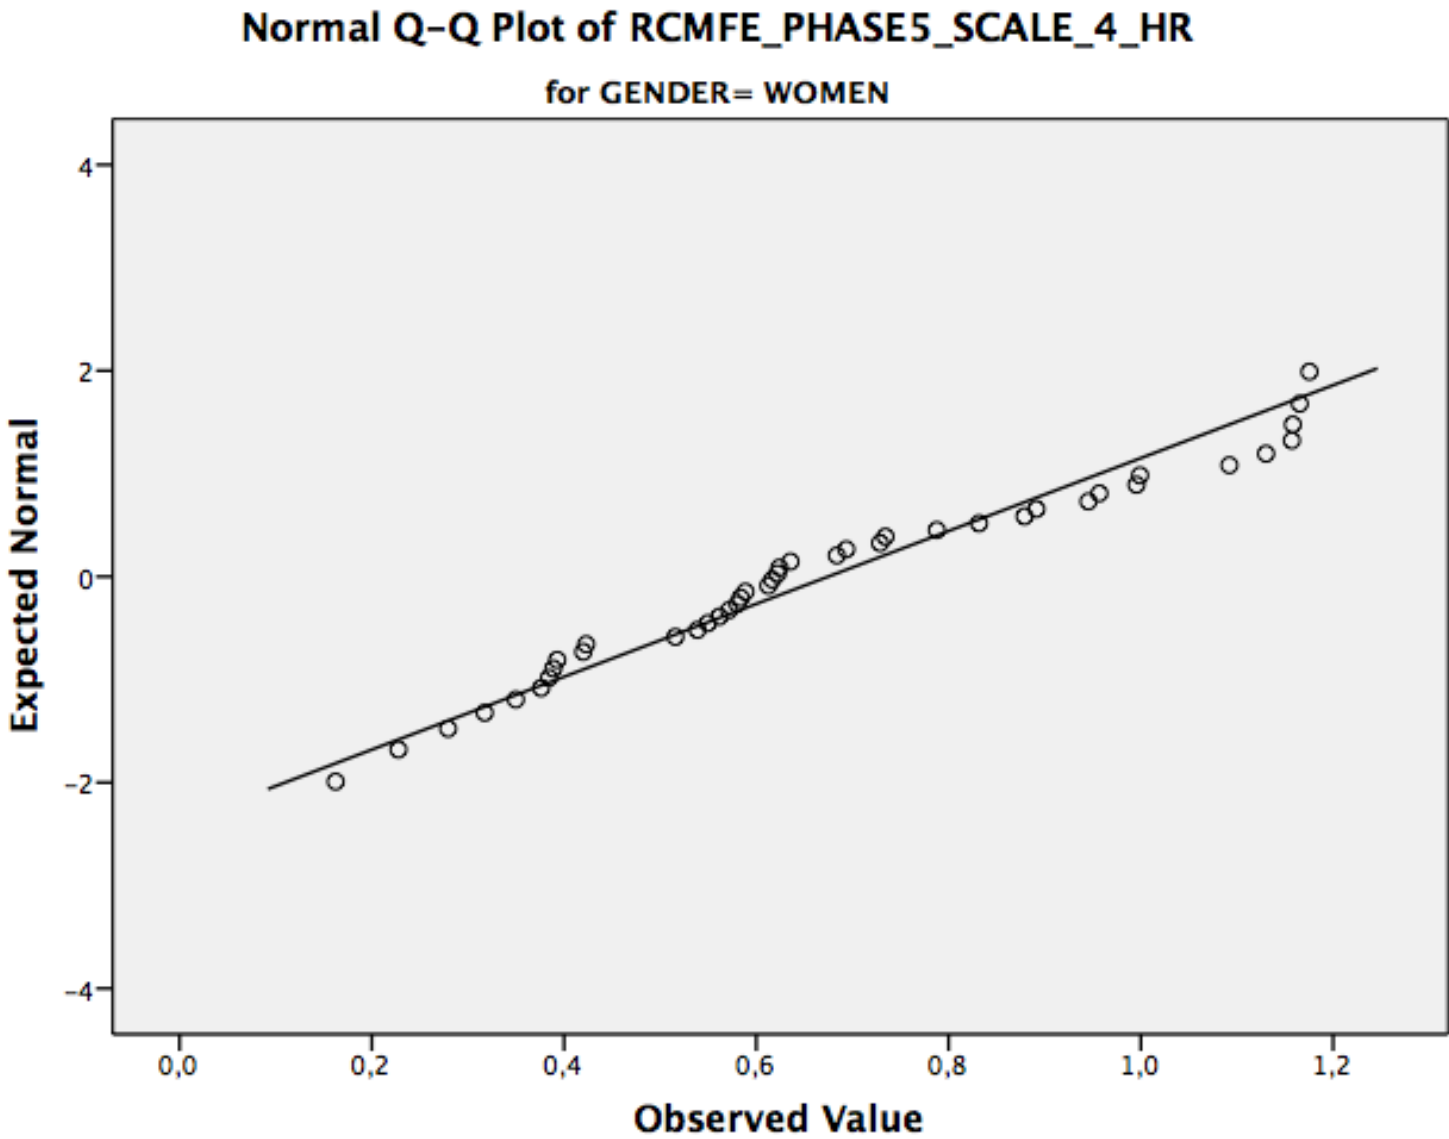

# Normal Q-Q Plot of RCMFE\_PHASE5\_SCALE\_4\_HR

for GENDER= MEN

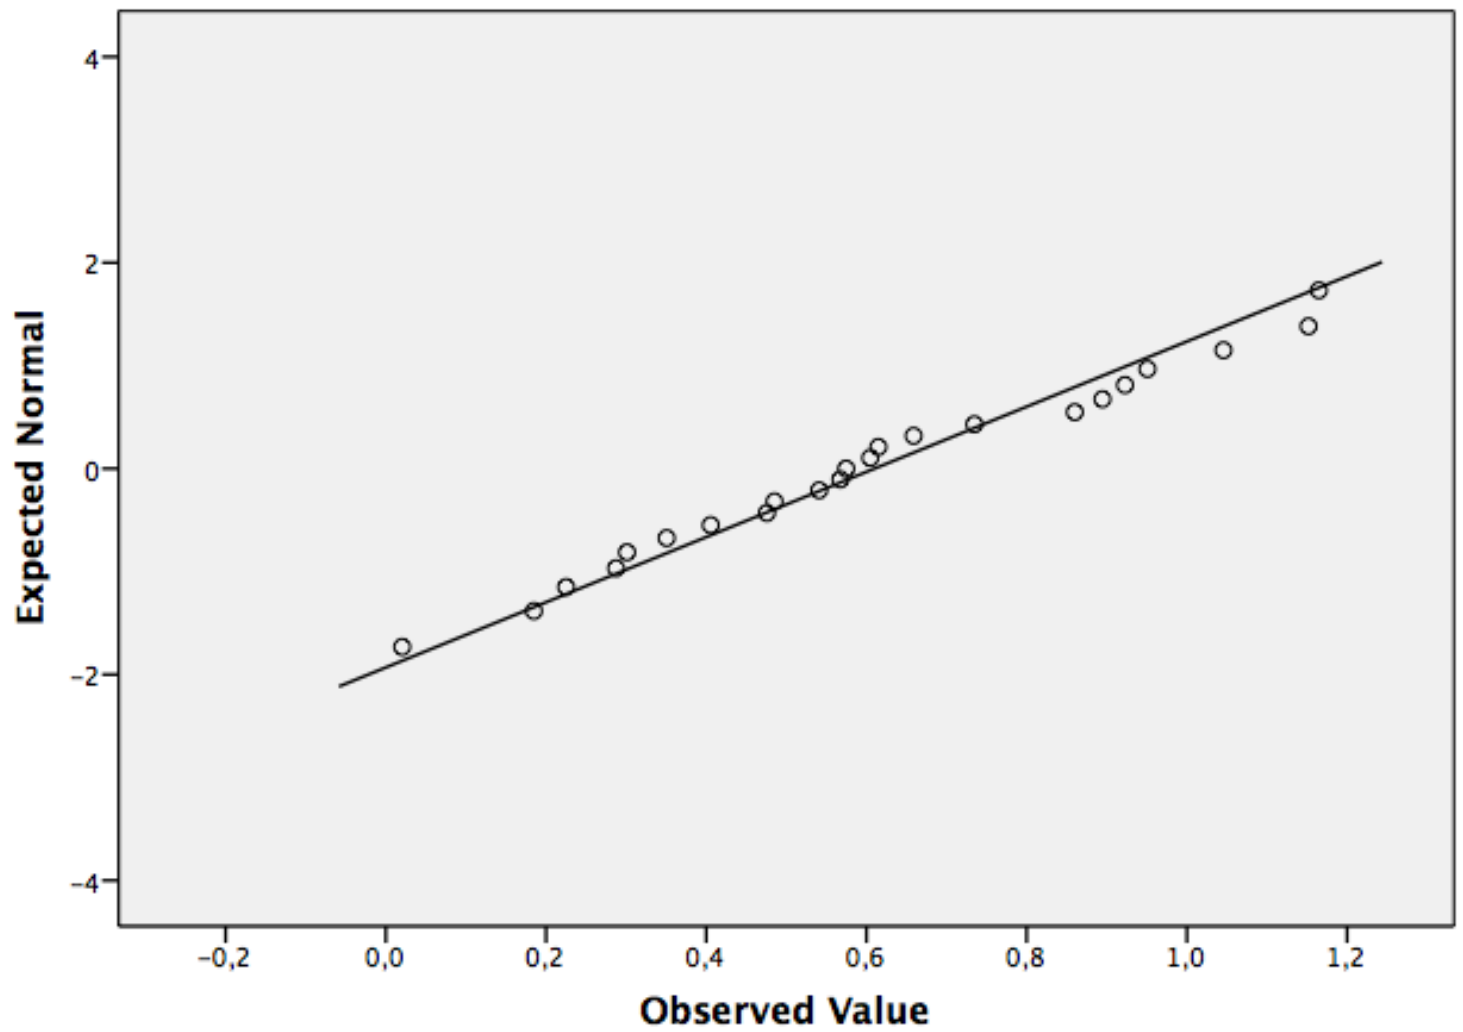

Normal Q-Q Plots

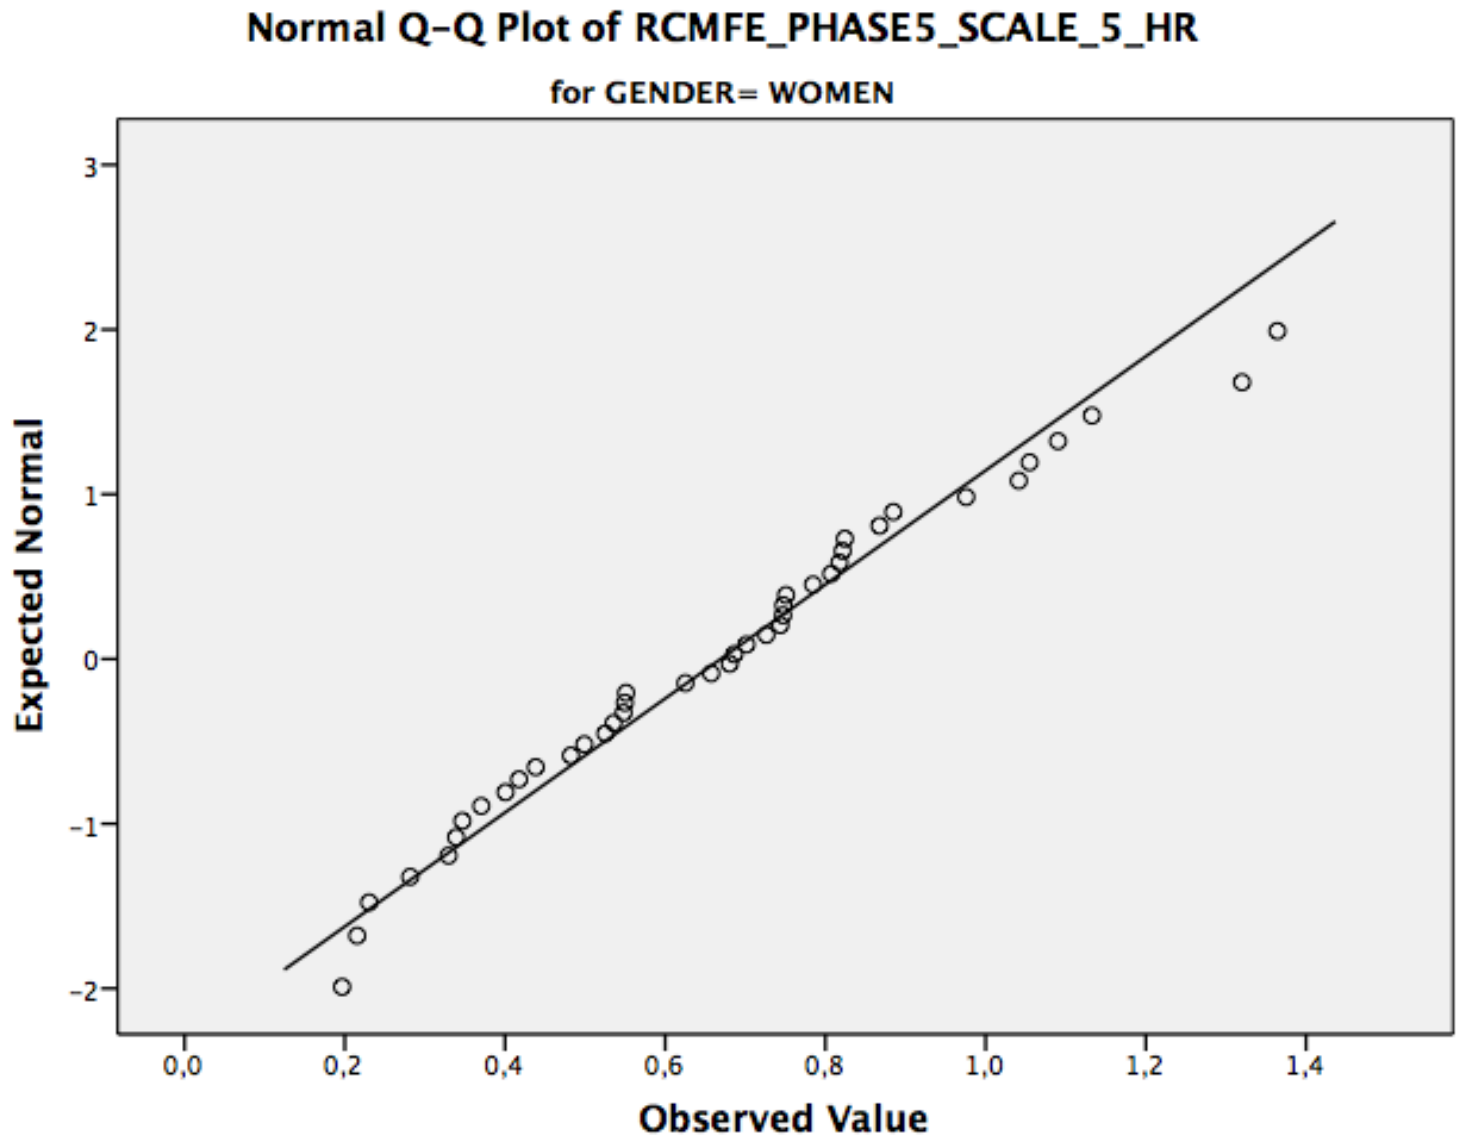

# Normal Q-Q Plot of RCMFE\_PHASE5\_SCALE\_5\_HR

for GENDER= MEN

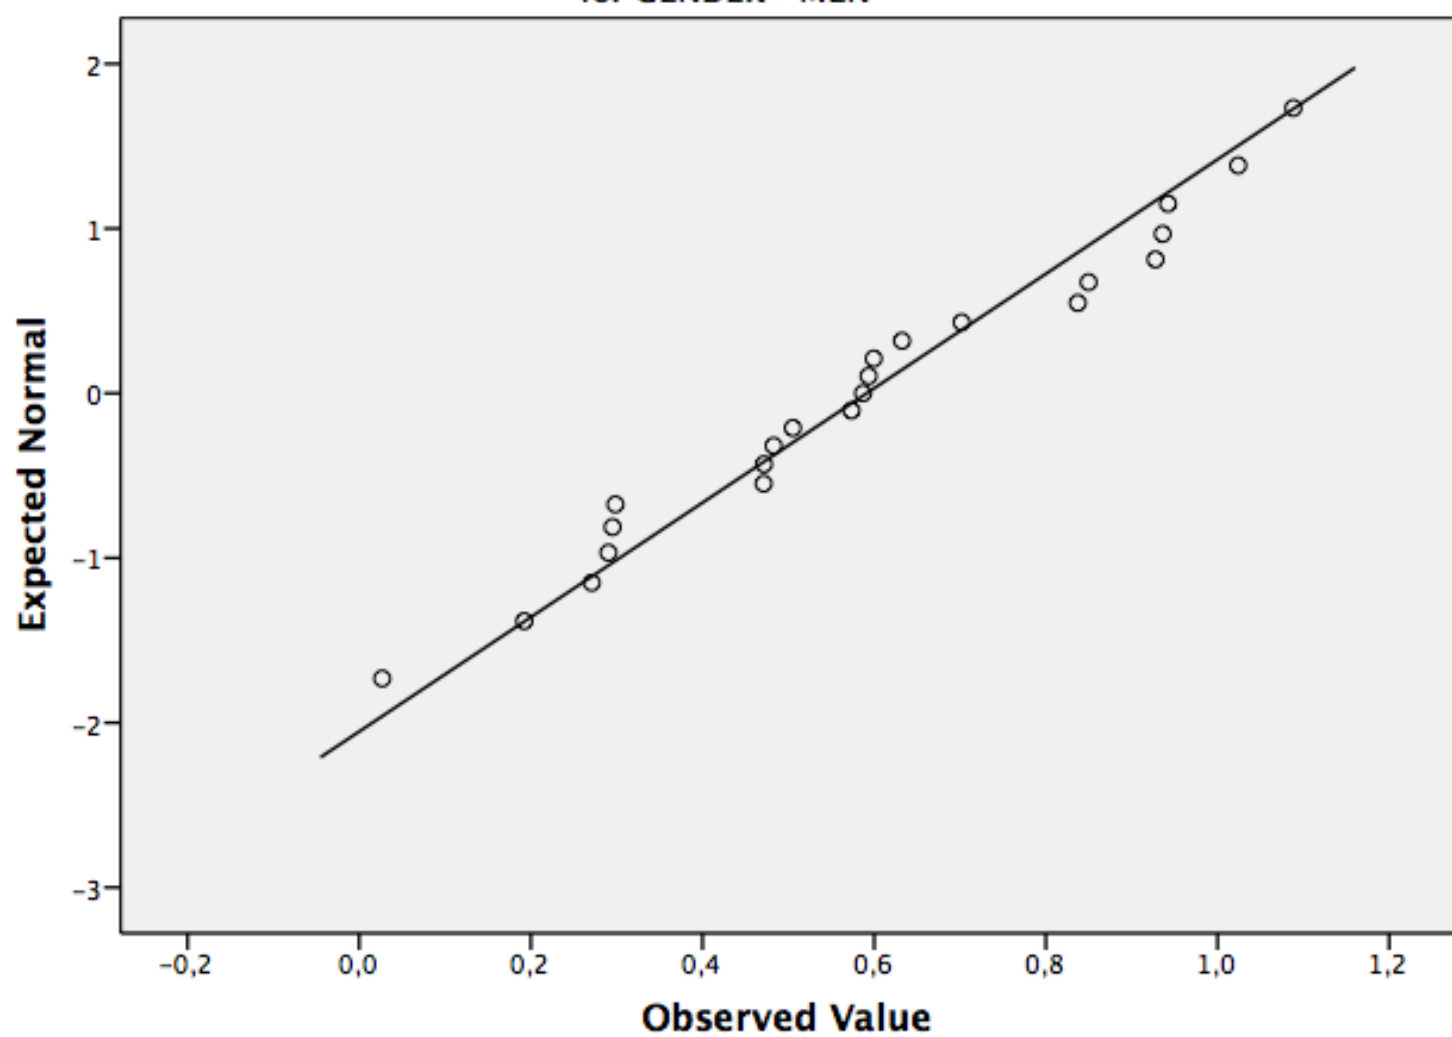

Case Processing Summary

| PATHOLOGY                  | Cases |         |         |         |       |         |
|----------------------------|-------|---------|---------|---------|-------|---------|
|                            | Valid |         | Missing |         | Total |         |
|                            | N     | Percent | N       | Percent | N     | Percent |
| RCMFE_PHASE1_SCALE_1 NO-OI | 29    | 100,0%  | 0       | 0,0%    | 29    | 100,0%  |
| _HR OI                     | 36    | 100,0%  | 0       | 0,0%    | 36    | 100,0%  |
| RCMFE_PHASE1_SCALE_2 NO-OI | 29    | 100,0%  | 0       | 0,0%    | 29    | 100,0%  |
| _HR OI                     | 36    | 100,0%  | 0       | 0,0%    | 36    | 100,0%  |
| RCMFE_PHASE1_SCALE_3 NO-OI | 29    | 100,0%  | 0       | 0,0%    | 29    | 100,0%  |
| _HR OI                     | 36    | 100,0%  | 0       | 0,0%    | 36    | 100,0%  |
| RCMFE_PHASE1_SCALE_4 NO-OI | 29    | 100,0%  | 0       | 0,0%    | 29    | 100,0%  |
| _HR OI                     | 36    | 100,0%  | 0       | 0,0%    | 36    | 100,0%  |
| RCMFE_PHASE1_SCALE_5 NO-OI | 29    | 100,0%  | 0       | 0,0%    | 29    | 100,0%  |
| _HR OI                     | 36    | 100,0%  | 0       | 0,0%    | 36    | 100,0%  |
| RCMFE_PHASE2_SCALE_1 NO-OI | 29    | 100,0%  | 0       | 0,0%    | 29    | 100,0%  |
| _HR OI                     | 36    | 100,0%  | 0       | 0,0%    | 36    | 100,0%  |
| RCMFE_PHASE2_SCALE_2 NO-OI | 29    | 100,0%  | 0       | 0,0%    | 29    | 100,0%  |
| _HR OI                     | 36    | 100,0%  | 0       | 0,0%    | 36    | 100,0%  |
| RCMFE_PHASE2_SCALE_3 NO-OI | 29    | 100,0%  | 0       | 0,0%    | 29    | 100,0%  |
| _HR OI                     | 36    | 100,0%  | 0       | 0,0%    | 36    | 100,0%  |
| RCMFE_PHASE2_SCALE_4 NO-OI | 29    | 100,0%  | 0       | 0,0%    | 29    | 100,0%  |
| _HR OI                     | 36    | 100,0%  | 0       | 0,0%    | 36    | 100,0%  |
| RCMFE_PHASE2_SCALE_5 NO-OI | 29    | 100,0%  | 0       | 0,0%    | 29    | 100,0%  |
| _HR OI                     | 36    | 100,0%  | 0       | 0,0%    | 36    | 100,0%  |
| RCMFE_PHASE3_SCALE_1 NO-OI | 29    | 100,0%  | 0       | 0,0%    | 29    | 100,0%  |
| _HR OI                     | 36    | 100,0%  | 0       | 0,0%    | 36    | 100,0%  |
| RCMFE_PHASE3_SCALE_2 NO-OI | 29    | 100,0%  | 0       | 0,0%    | 29    | 100,0%  |
| _HR OI                     | 36    | 100,0%  | 0       | 0,0%    | 36    | 100,0%  |
| RCMFE_PHASE3_SCALE_3 NO-OI | 29    | 100,0%  | 0       | 0,0%    | 29    | 100,0%  |
| _HR OI                     | 36    | 100,0%  | 0       | 0,0%    | 36    | 100,0%  |
| RCMFE_PHASE3_SCALE_4 NO-OI | 29    | 100,0%  | 0       | 0,0%    | 29    | 100,0%  |
| _HR OI                     | 36    | 100,0%  | 0       | 0,0%    | 36    | 100,0%  |
| RCMFE_PHASE3_SCALE_5 NO-OI | 29    | 100,0%  | 0       | 0,0%    | 29    | 100,0%  |
| _HR OI                     | 36    | 100,0%  | 0       | 0,0%    | 36    | 100,0%  |
| RCMFE_PHASE4_SCALE_1 NO-OI | 29    | 100,0%  | 0       | 0,0%    | 29    | 100,0%  |
| _HR OI                     | 36    | 100,0%  | 0       | 0,0%    | 36    | 100,0%  |
| RCMFE_PHASE4_SCALE_2 NO-OI | 29    | 100,0%  | 0       | 0,0%    | 29    | 100,0%  |
| _HR OI                     | 36    | 100,0%  | 0       | 0,0%    | 36    | 100,0%  |
| RCMFE_PHASE4_SCALE_3 NO-OI | 29    | 100,0%  | 0       | 0,0%    | 29    | 100,0%  |
| _HR OI                     | 36    | 100,0%  | 0       | 0,0%    | 36    | 100,0%  |
| RCMFE_PHASE4_SCALE_4 NO-OI | 29    | 100,0%  | 0       | 0,0%    | 29    | 100,0%  |
| _HR OI                     | 36    | 100,0%  | 0       | 0,0%    | 36    | 100,0%  |
| RCMFE_PHASE4_SCALE_5 NO-OI | 29    | 100,0%  | 0       | 0,0%    | 29    | 100,0%  |
| _HR OI                     | 36    | 100,0%  | 0       | 0,0%    | 36    | 100,0%  |
| RCMFE_PHASE5_SCALE_1 NO-OI | 29    | 100,0%  | 0       | 0,0%    | 29    | 100,0%  |
| _HR                        |       |         |         |         |       |         |



### Case Processing Summary

| PATHOLOGY            |       | Cases |         |         |         |       |         |
|----------------------|-------|-------|---------|---------|---------|-------|---------|
|                      |       | Valid |         | Missing |         | Total |         |
|                      |       | N     | Percent | N       | Percent | N     | Percent |
| RCMFE_PHASE5_SCALE_1 | OI    | 36    | 100,0%  | 0       | 0,0%    | 36    | 100,0%  |
| _HR                  |       |       |         |         |         |       |         |
| RCMFE_PHASE5_SCALE_2 | NO-OI | 29    | 100,0%  | 0       | 0,0%    | 29    | 100,0%  |
| _HR                  | OI    | 36    | 100,0%  | 0       | 0,0%    | 36    | 100,0%  |
| RCMFE_PHASE5_SCALE_3 | NO-OI | 29    | 100,0%  | 0       | 0,0%    | 29    | 100,0%  |
| _HR                  | OI    | 36    | 100,0%  | 0       | 0,0%    | 36    | 100,0%  |
| RCMFE_PHASE5_SCALE_4 | NO-OI | 29    | 100,0%  | 0       | 0,0%    | 29    | 100,0%  |
| _HR                  | OI    | 36    | 100,0%  | 0       | 0,0%    | 36    | 100,0%  |
| RCMFE_PHASE5_SCALE_5 | NO-OI | 29    | 100,0%  | 0       | 0,0%    | 29    | 100,0%  |
| _HR                  | OI    | 36    | 100,0%  | 0       | 0,0%    | 36    | 100,0%  |

### Tests of Normality

| PATHOLOGY            |       | Kolmogorov-Smirnov <sup>a</sup> |    |       | Shapiro-Wilk |    |      |
|----------------------|-------|---------------------------------|----|-------|--------------|----|------|
|                      |       | Statistic                       | df | Sig.  | Statistic    | df | Sig. |
| RCMFE_PHASE1_SCALE_1 | NO-OI | ,111                            | 29 | ,200* | ,977         | 29 | ,752 |
| _HR                  | OI    | ,195                            | 36 | ,001  | ,897         | 36 | ,003 |
| RCMFE_PHASE1_SCALE_2 | NO-OI | ,097                            | 29 | ,200* | ,971         | 29 | ,580 |
| _HR                  | OI    | ,122                            | 36 | ,193  | ,961         | 36 | ,233 |
| RCMFE_PHASE1_SCALE_3 | NO-OI | ,099                            | 29 | ,200* | ,974         | 29 | ,669 |
| _HR                  | OI    | ,128                            | 36 | ,144  | ,970         | 36 | ,438 |
| RCMFE_PHASE1_SCALE_4 | NO-OI | ,071                            | 29 | ,200* | ,990         | 29 | ,990 |
| _HR                  | OI    | ,115                            | 36 | ,200* | ,968         | 36 | ,374 |
| RCMFE_PHASE1_SCALE_5 | NO-OI | ,172                            | 29 | ,028  | ,947         | 29 | ,155 |
| _HR                  | OI    | ,098                            | 36 | ,200* | ,962         | 36 | ,252 |
| RCMFE_PHASE2_SCALE_1 | NO-OI | ,129                            | 29 | ,200* | ,908         | 29 | ,015 |
| _HR                  | OI    | ,161                            | 36 | ,019  | ,873         | 36 | ,051 |
| RCMFE_PHASE2_SCALE_2 | NO-OI | ,121                            | 29 | ,200* | ,935         | 29 | ,075 |
| _HR                  | OI    | ,231                            | 36 | ,050  | ,856         | 36 | ,020 |
| RCMFE_PHASE2_SCALE_3 | NO-OI | ,182                            | 29 | ,015  | ,925         | 29 | ,042 |
| _HR                  | OI    | ,213                            | 36 | ,050  | ,863         | 36 | ,080 |
| RCMFE_PHASE2_SCALE_4 | NO-OI | ,173                            | 29 | ,027  | ,914         | 29 | ,021 |
| _HR                  | OI    | ,207                            | 36 | ,060  | ,857         | 36 | ,000 |
| RCMFE_PHASE2_SCALE_5 | NO-OI | ,138                            | 29 | ,170  | ,938         | 29 | ,090 |
| _HR                  | OI    | ,206                            | 36 | ,070  | ,840         | 36 | ,080 |
| RCMFE_PHASE3_SCALE_1 | NO-OI | ,093                            | 29 | ,200* | ,941         | 29 | ,107 |
| _HR                  | OI    | ,137                            | 36 | ,085  | ,936         | 36 | ,038 |
| RCMFE_PHASE3_SCALE_2 | NO-OI | ,106                            | 29 | ,200* | ,974         | 29 | ,666 |
| _HR                  | OI    | ,100                            | 36 | ,200* | ,966         | 36 | ,318 |
| RCMFE_PHASE3_SCALE_3 | NO-OI | ,080                            | 29 | ,200* | ,987         | 29 | ,972 |
| _HR                  | OI    | ,102                            | 36 | ,200* | ,974         | 36 | ,550 |
| RCMFE_PHASE3_SCALE_4 | NO-OI | ,079                            | 29 | ,200* | ,987         | 29 | ,964 |
| _HR                  | OI    | ,174                            | 36 | ,007  | ,941         | 36 | ,056 |

|                      |       |      |    |       |      |    |      |
|----------------------|-------|------|----|-------|------|----|------|
| RCMFE_PHASE3_SCALE_5 | NO-OI | ,077 | 29 | ,200* | ,987 | 29 | ,969 |
| _HR                  | OI    | ,114 | 36 | ,200* | ,980 | 36 | ,735 |
| RCMFE_PHASE4_SCALE_1 | NO-OI | ,157 | 29 | ,067  | ,904 | 29 | ,012 |
| _HR                  | OI    | ,134 | 36 | ,103  | ,933 | 36 | ,030 |
| RCMFE_PHASE4_SCALE_2 | NO-OI | ,134 | 29 | ,193  | ,922 | 29 | ,034 |
| _HR                  | OI    | ,137 | 36 | ,085  | ,914 | 36 | ,008 |
| RCMFE_PHASE4_SCALE_3 | NO-OI | ,138 | 29 | ,164  | ,884 | 29 | ,004 |
|                      | OI    | ,155 | 36 | ,029  | ,900 | 36 | ,053 |
| RCMFE_PHASE4_SCALE_4 | NO-OI | ,202 | 29 | ,004  | ,836 | 29 | ,060 |
| _HR                  | OI    | ,154 | 36 | ,031  | ,901 | 36 | ,074 |
| RCMFE_PHASE4_SCALE_5 | NO-OI | ,163 | 29 | ,048  | ,838 | 29 | ,000 |
| _HR                  | OI    | ,139 | 36 | ,075  | ,897 | 36 | ,003 |
| RCMFE_PHASE5_SCALE_1 | NO-OI | ,107 | 29 | ,200* | ,972 | 29 | ,606 |
| _HR                  | OI    | ,065 | 36 | ,200* | ,981 | 36 | ,790 |

#### Tests of Normality

| PATHOLOGY            |       | Kolmogorov-Smirnov <sup>a</sup> |    |       | Shapiro-Wilk |    |      |
|----------------------|-------|---------------------------------|----|-------|--------------|----|------|
|                      |       | Statistic                       | df | Sig.  | Statistic    | df | Sig. |
| RCMFE_PHASE5_SCALE_2 | NO-OI | ,097                            | 29 | ,200* | ,963         | 29 | ,385 |
| _HR                  | OI    | ,142                            | 36 | ,063  | ,931         | 36 | ,026 |
| RCMFE_PHASE5_SCALE_3 | NO-OI | ,123                            | 29 | ,200* | ,963         | 29 | ,381 |
| _HR                  | OI    | ,204                            | 36 | ,061  | ,921         | 36 | ,074 |
| RCMFE_PHASE5_SCALE_4 | NO-OI | ,129                            | 29 | ,200* | ,939         | 29 | ,094 |
| _HR                  | OI    | ,176                            | 36 | ,057  | ,905         | 36 | ,055 |
| RCMFE_PHASE5_SCALE_5 | NO-OI | ,141                            | 29 | ,145* | ,953         | 29 | ,222 |
| _HR                  | OI    | ,102                            | 36 | ,200* | ,950         | 36 | ,107 |

\*. This is a lower bound of the true significance.

a. Lilliefors Significance Correction

Normal Q-Q Plots

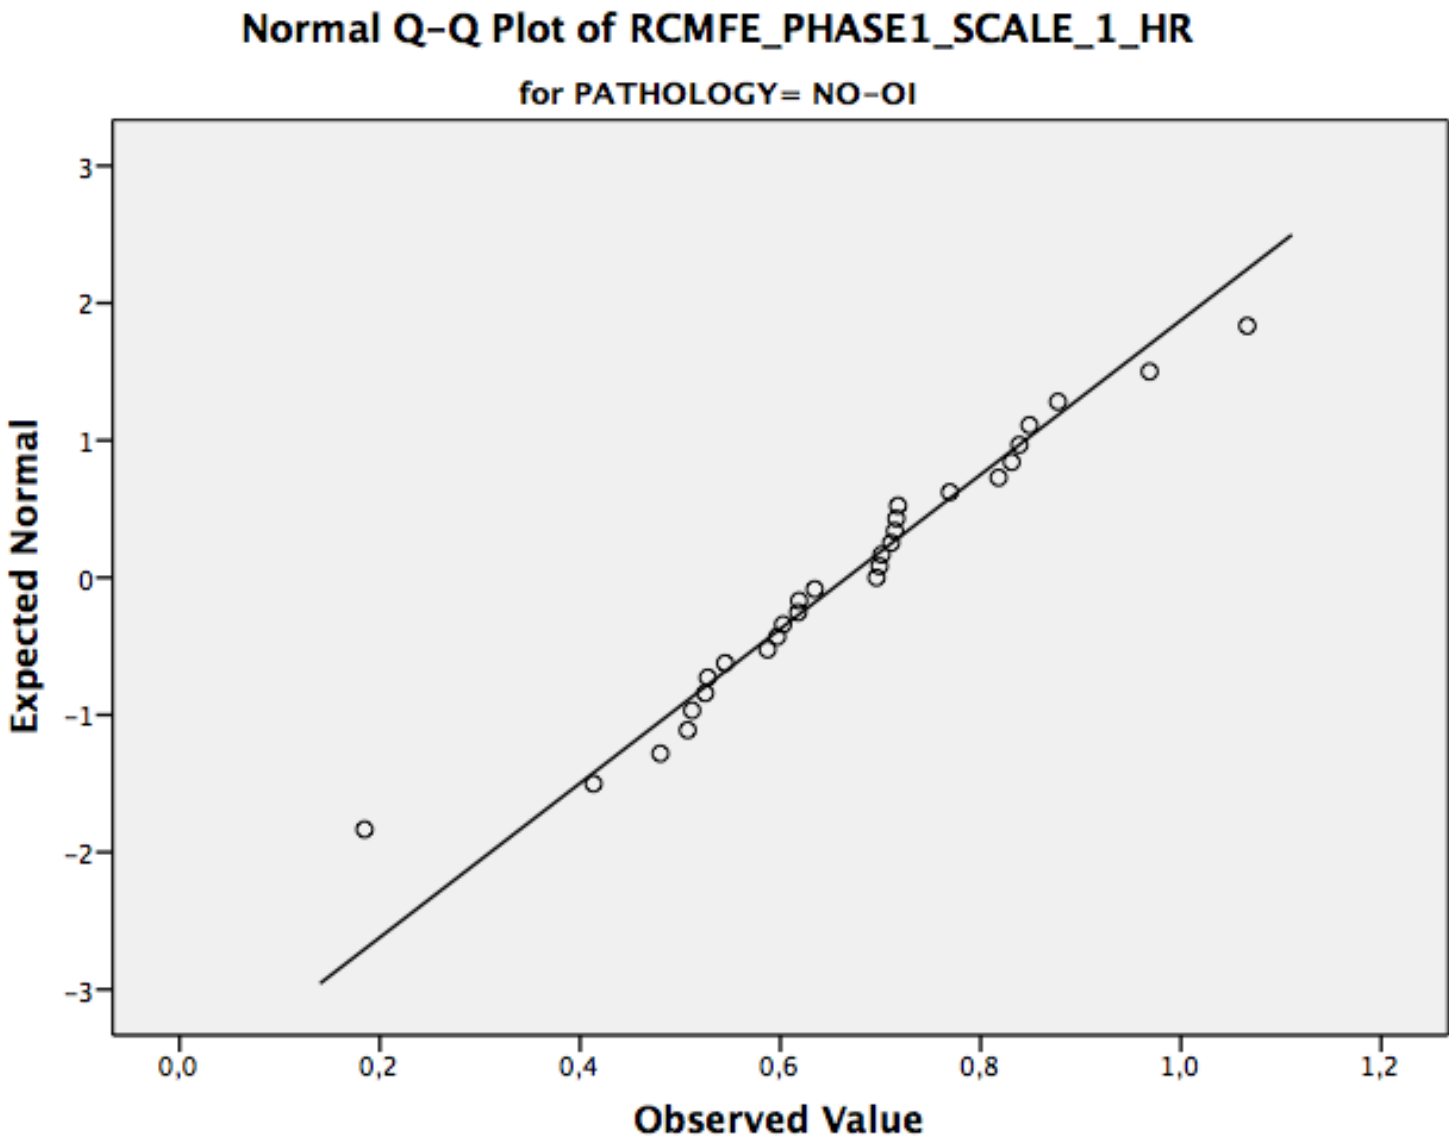

# Normal Q-Q Plot of RCMFE\_PHASE1\_SCALE\_1\_HR

for PATHOLOGY= OI

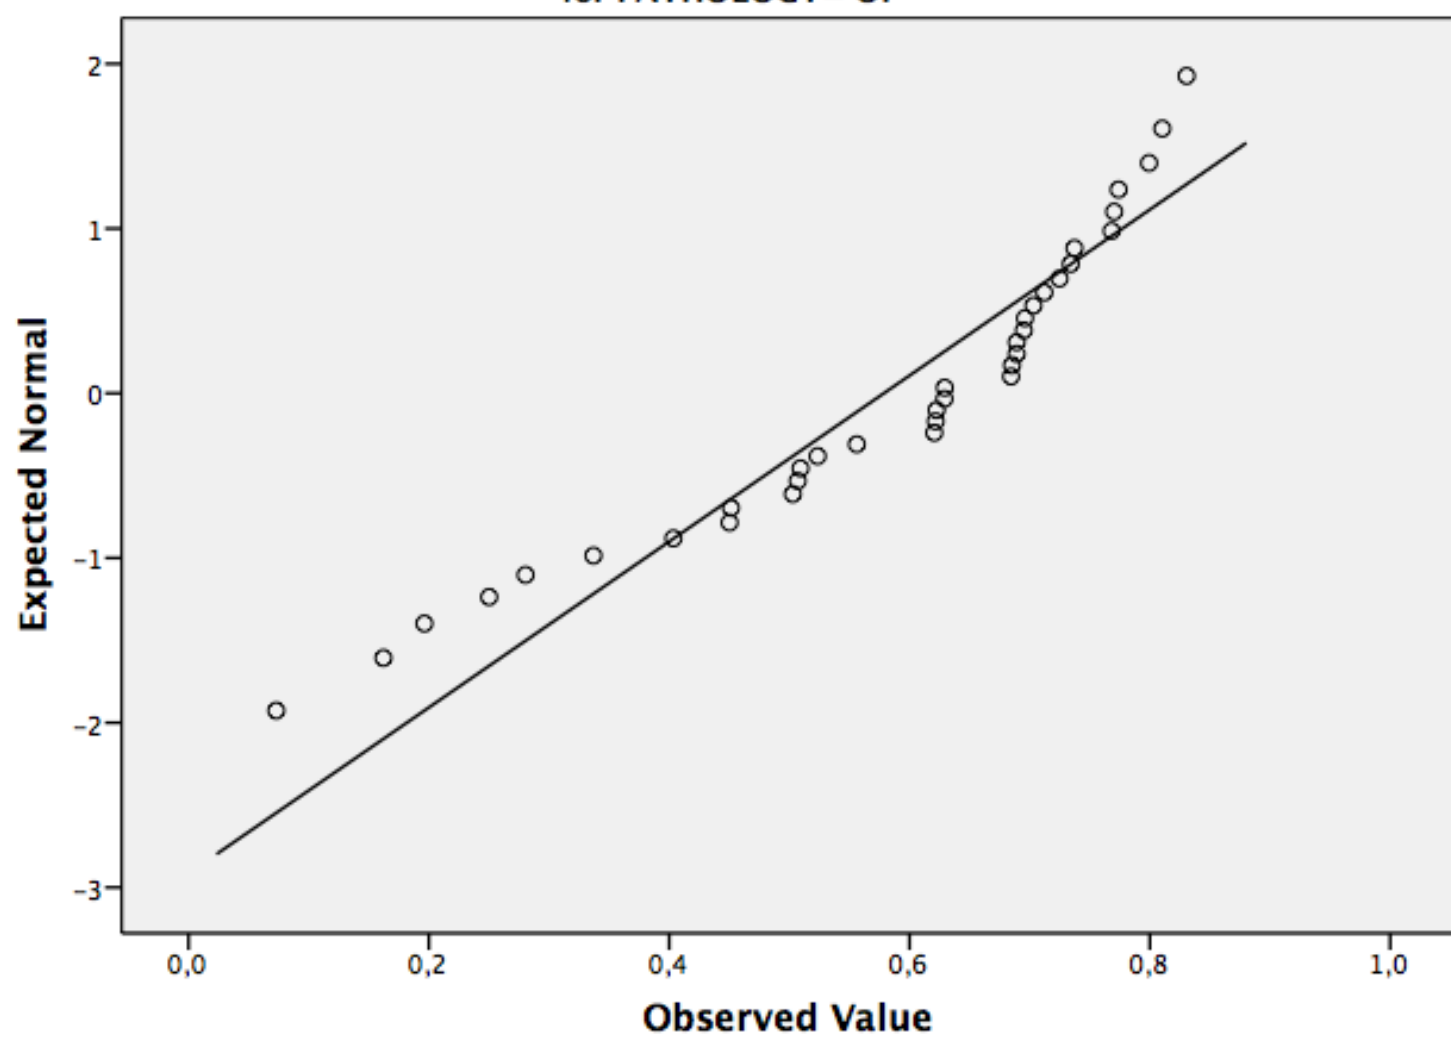

Normal Q-Q Plots

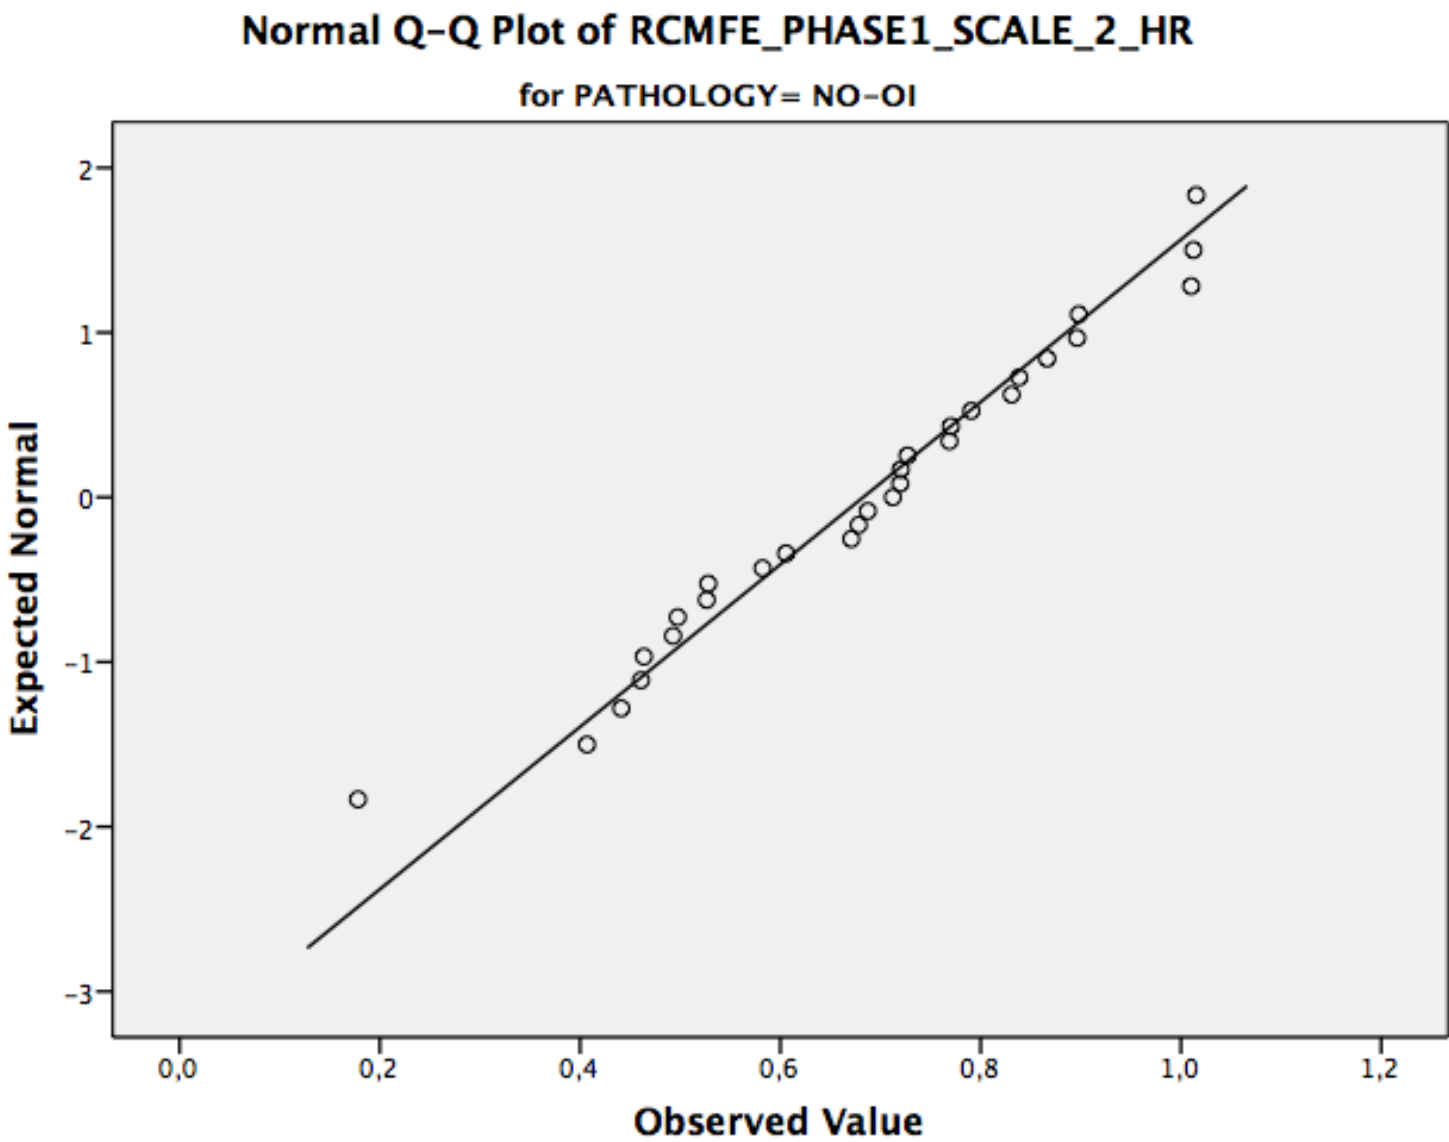

# Normal Q-Q Plot of RCMFE\_PHASE1\_SCALE\_2\_HR

for PATHOLOGY= OI

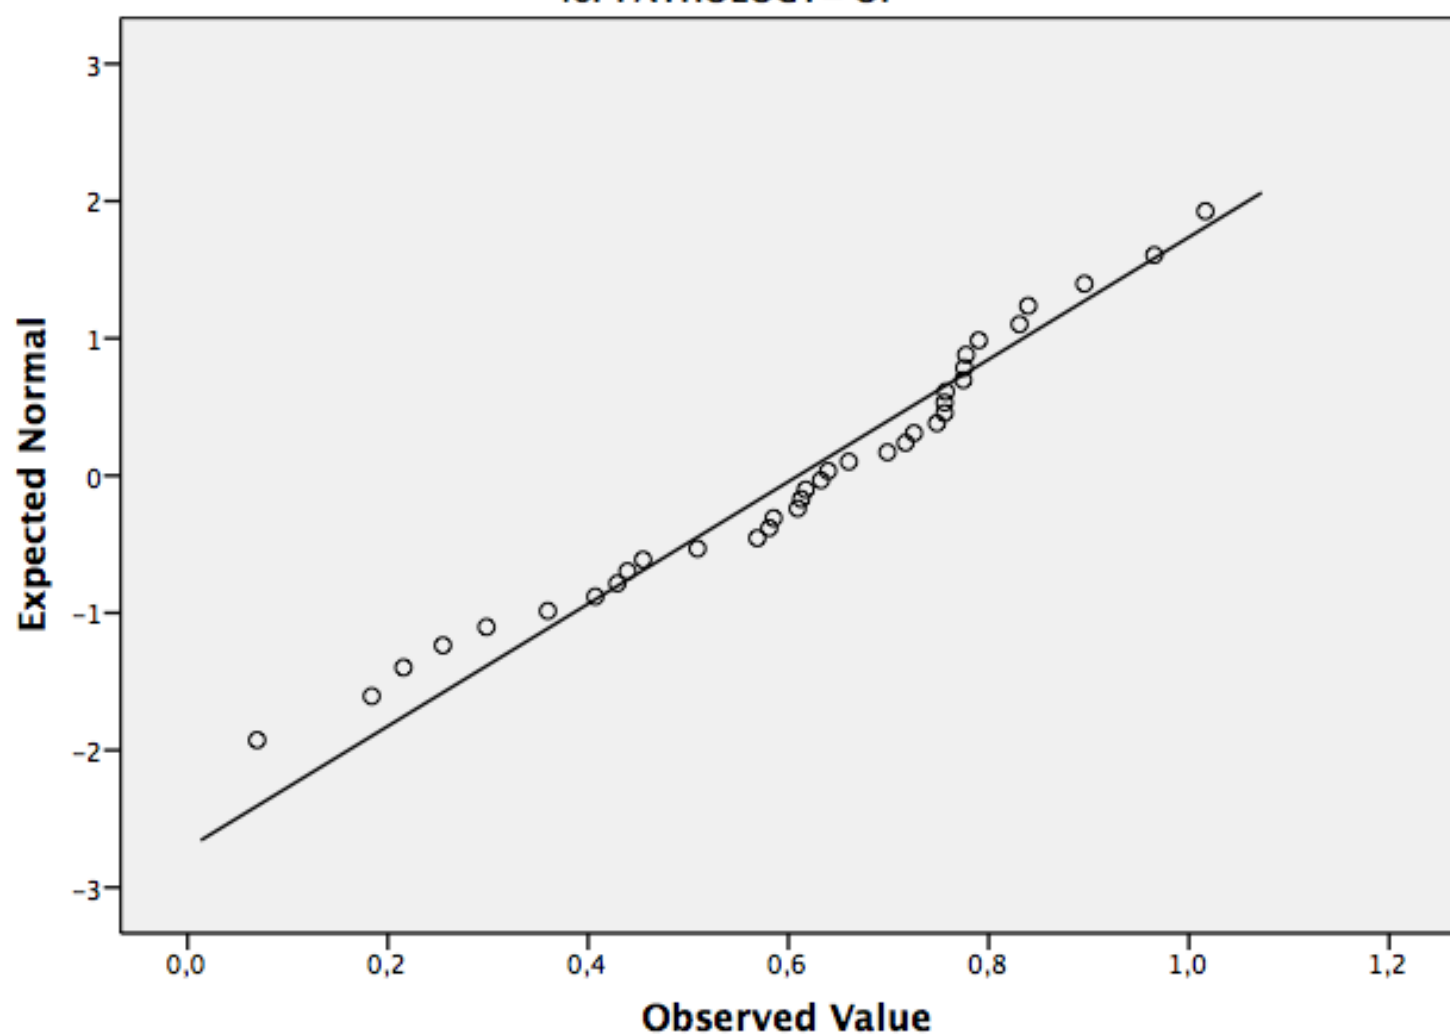

Normal Q-Q Plots

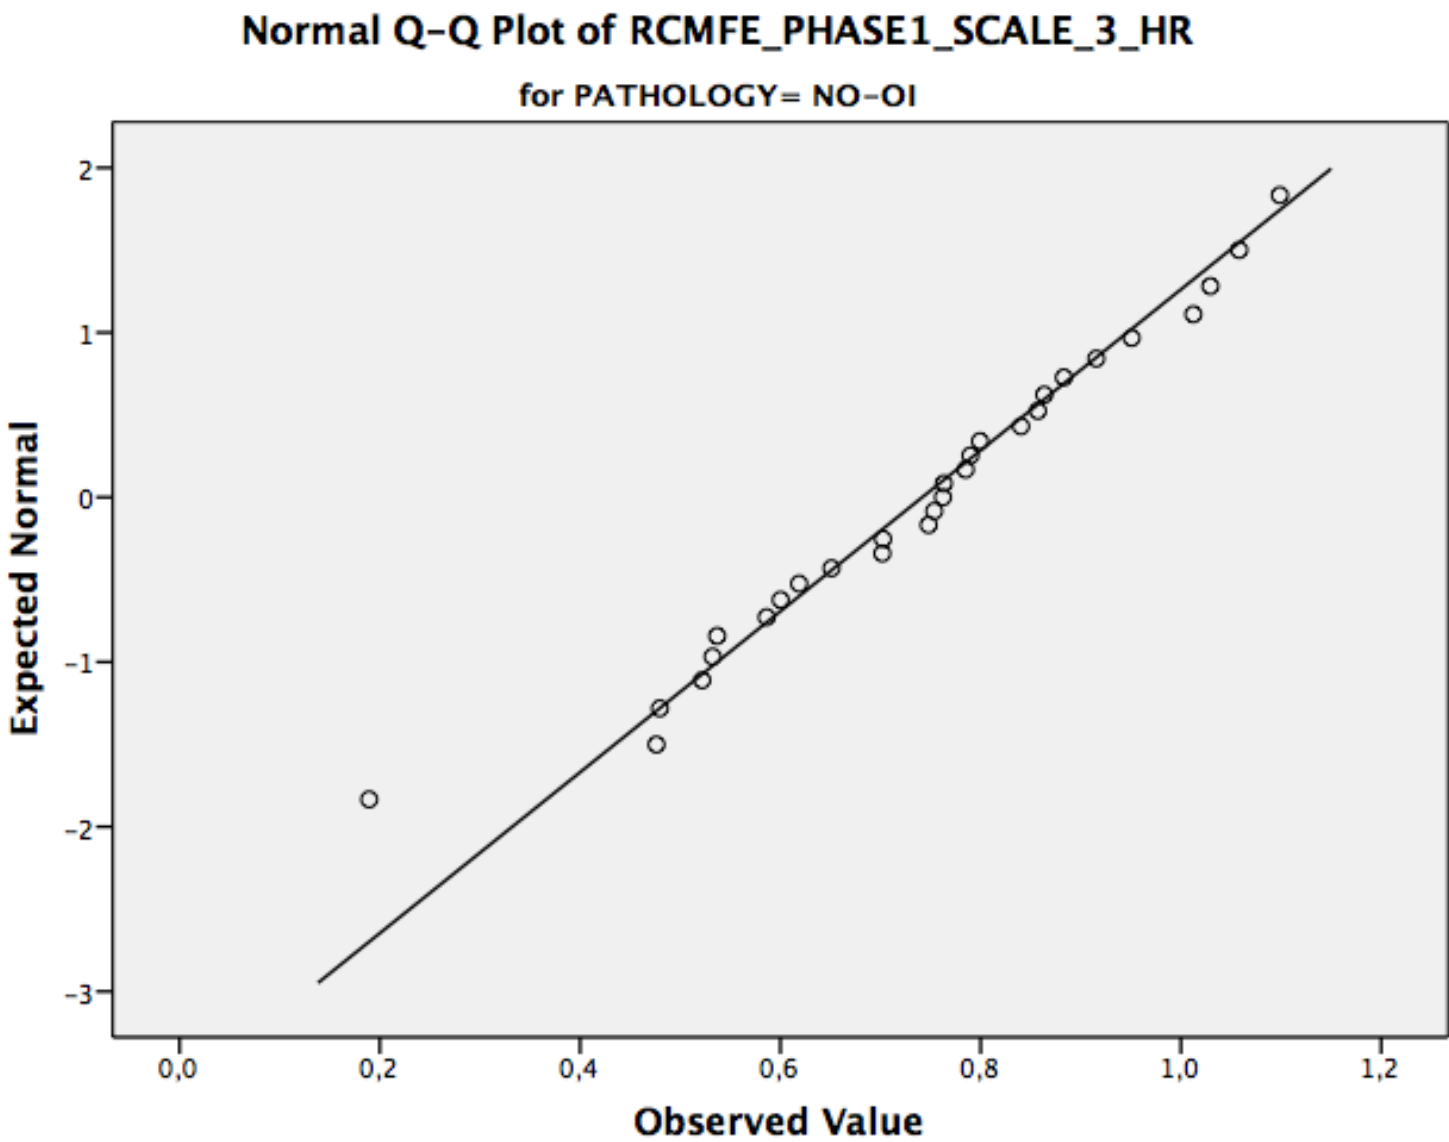

# Normal Q-Q Plot of RCMFE\_PHASE1\_SCALE\_3\_HR

for PATHOLOGY= OI

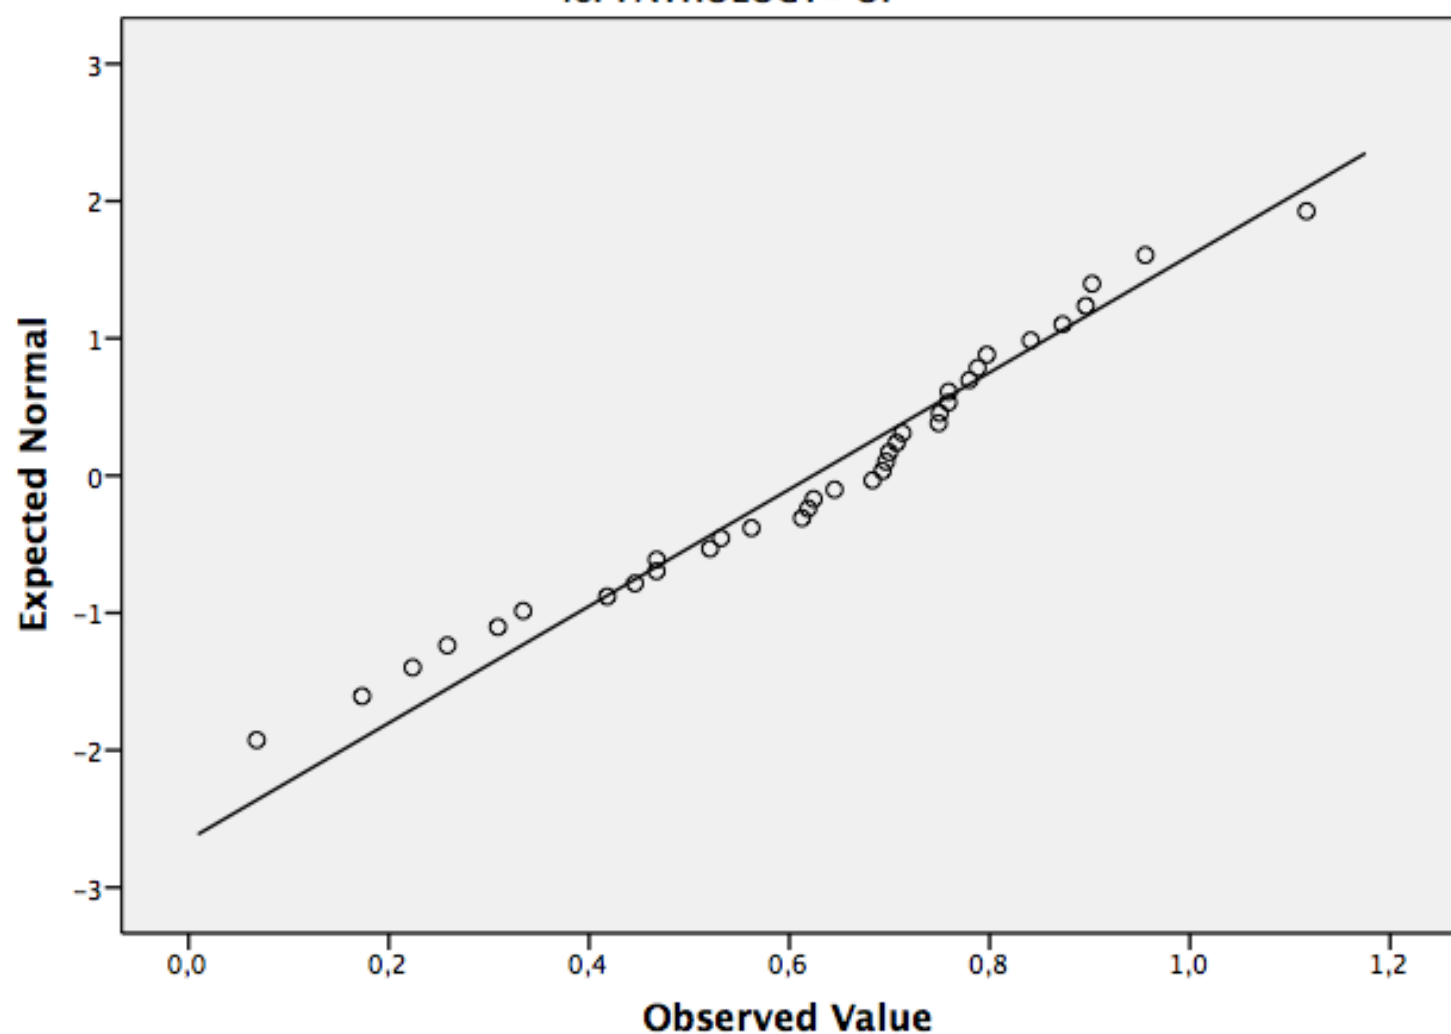



Normal Q-Q Plots

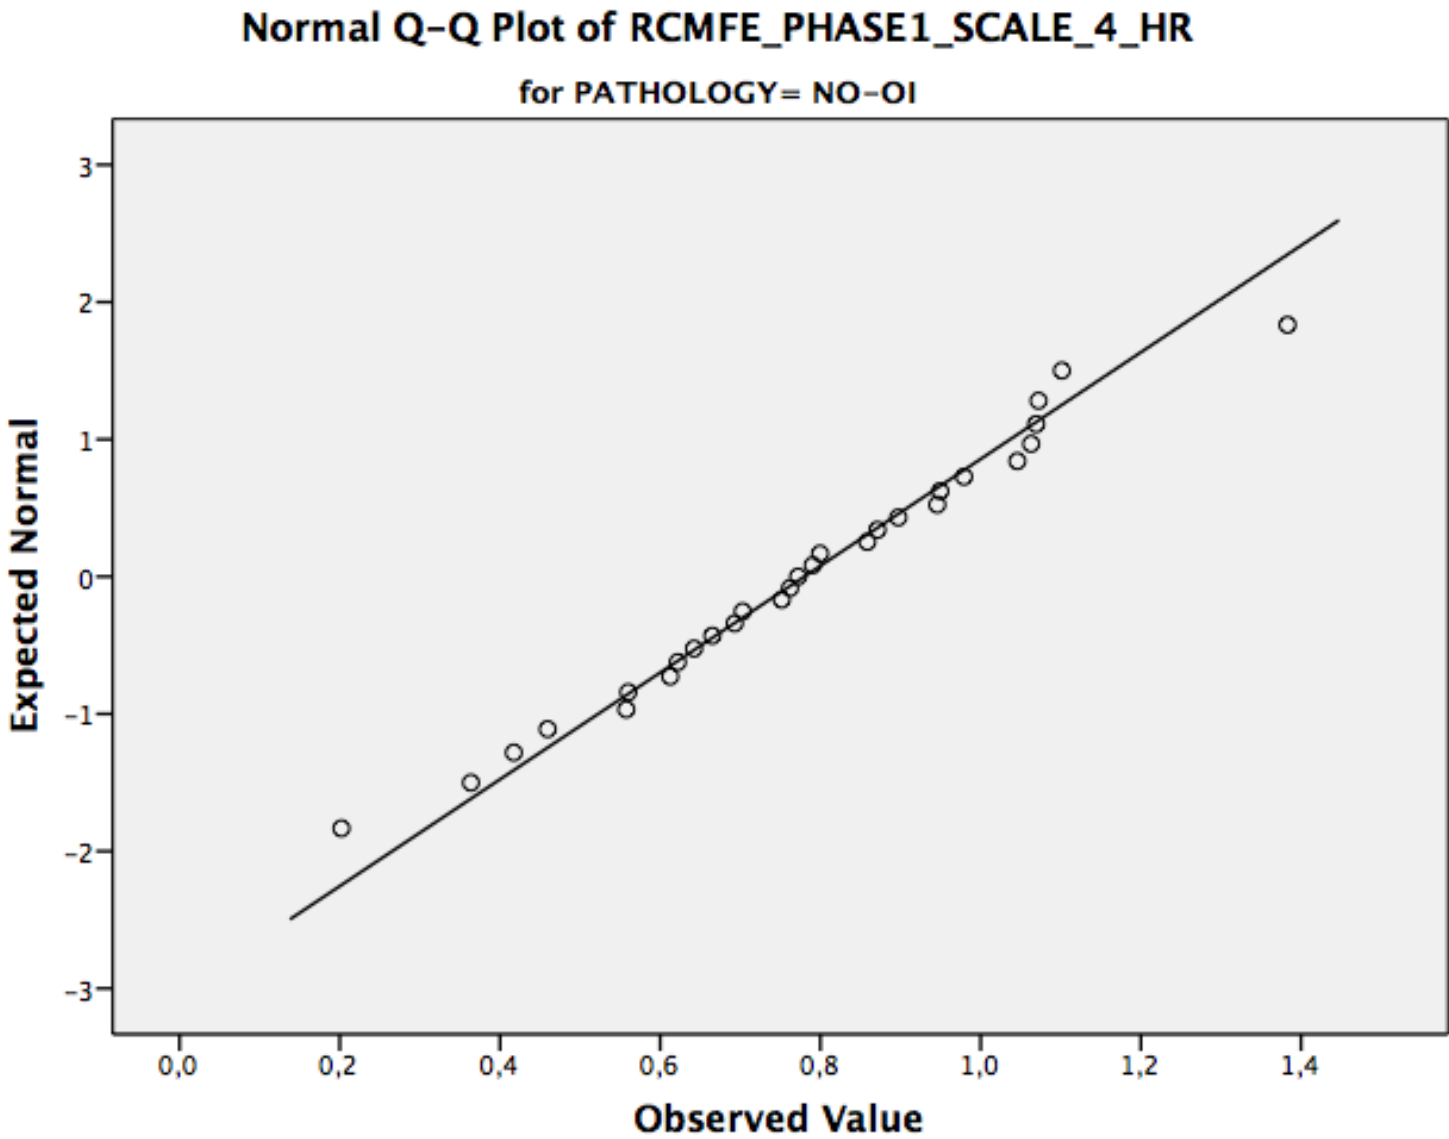

# Normal Q-Q Plot of RCMFE\_PHASE1\_SCALE\_4\_HR

for PATHOLOGY= OI

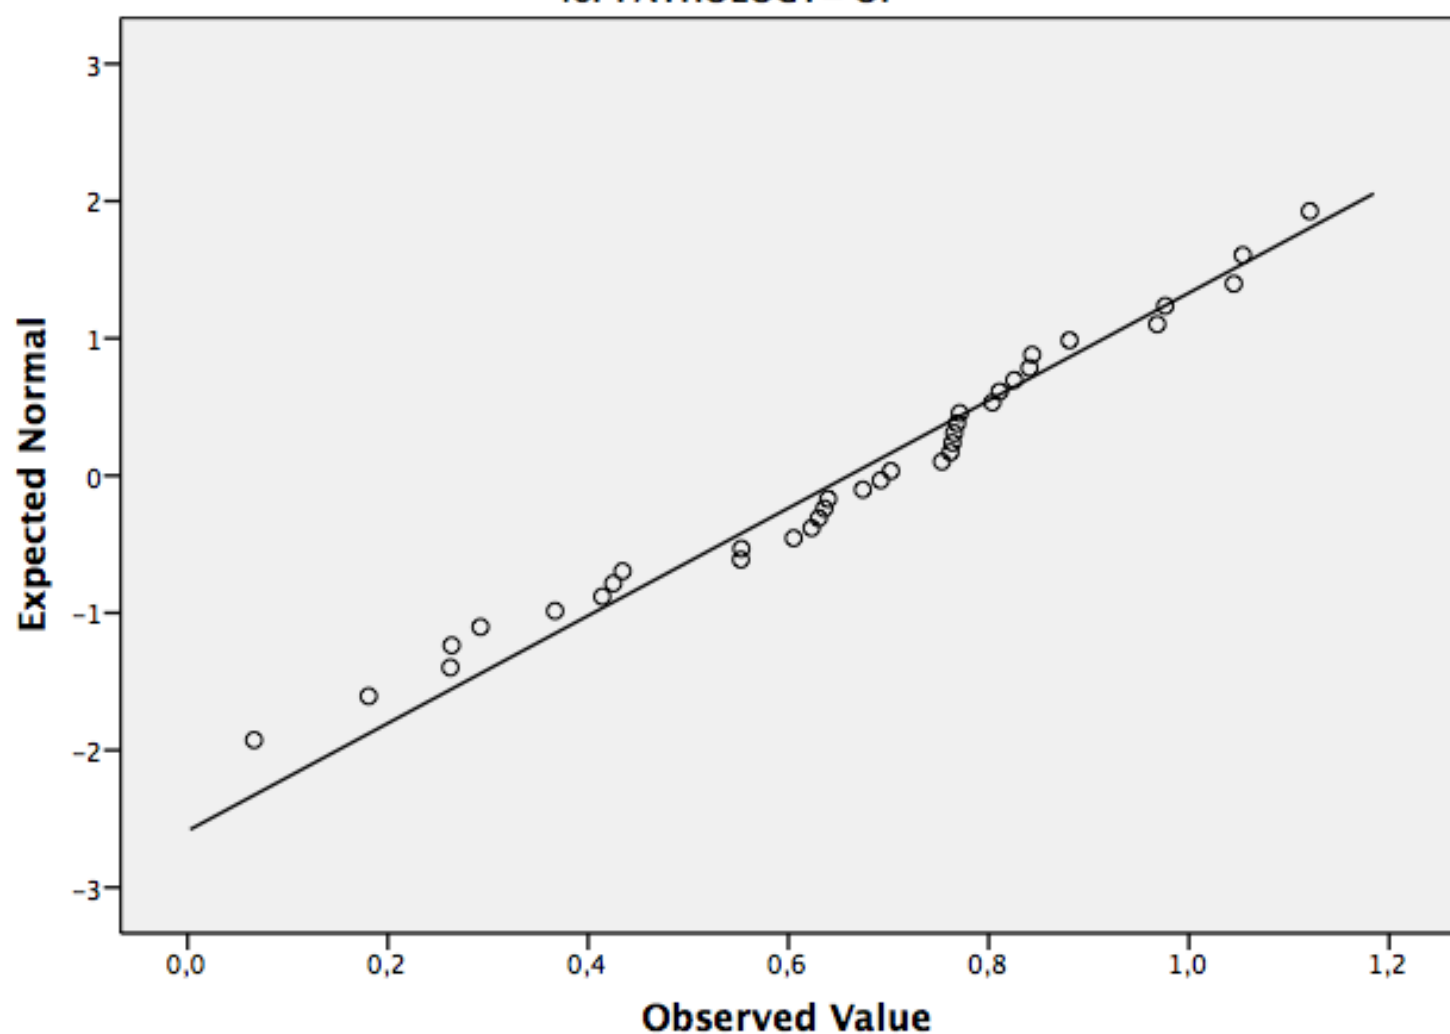

Normal Q-Q Plots

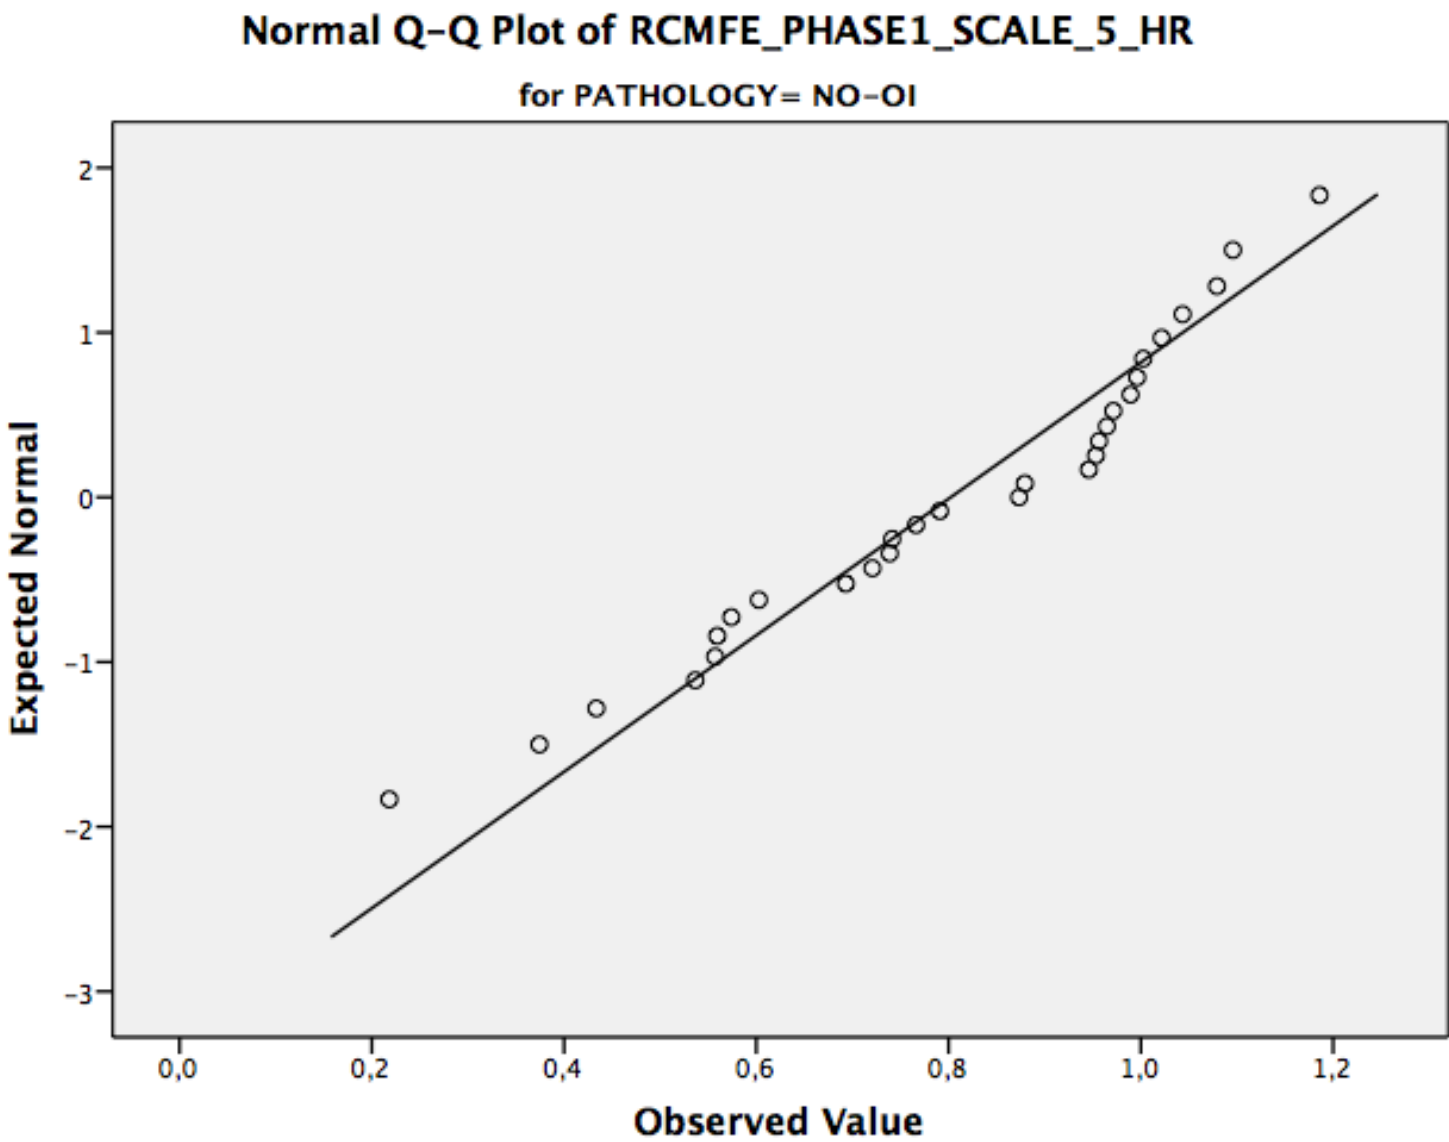

# Normal Q-Q Plot of RCMFE\_PHASE1\_SCALE\_5\_HR

for PATHOLOGY= OI

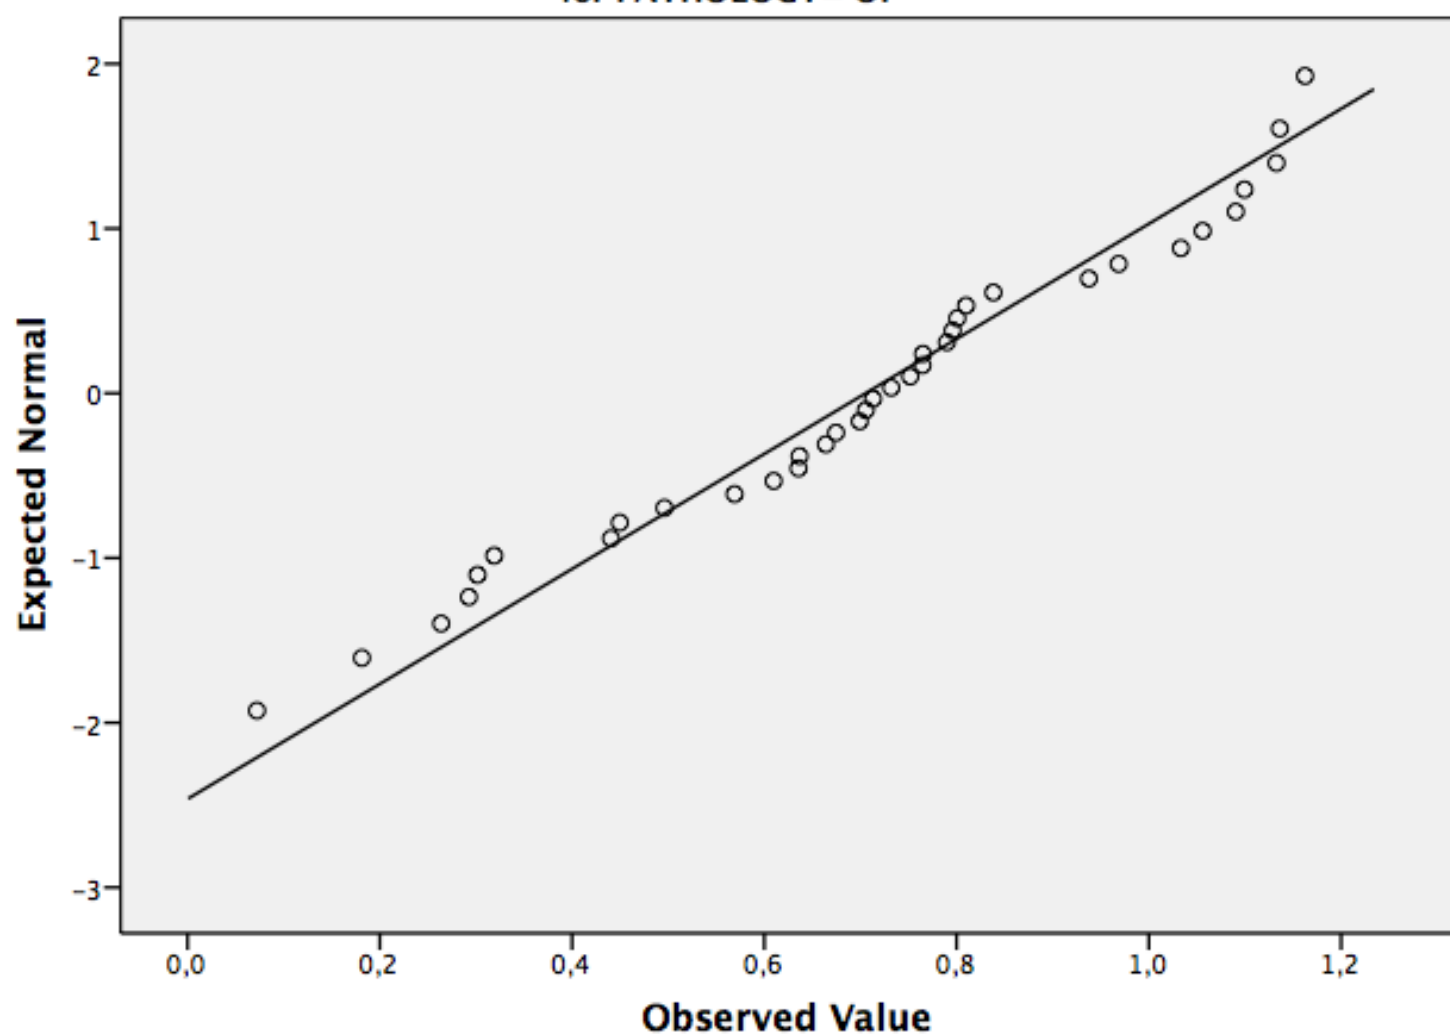

Normal Q-Q Plots

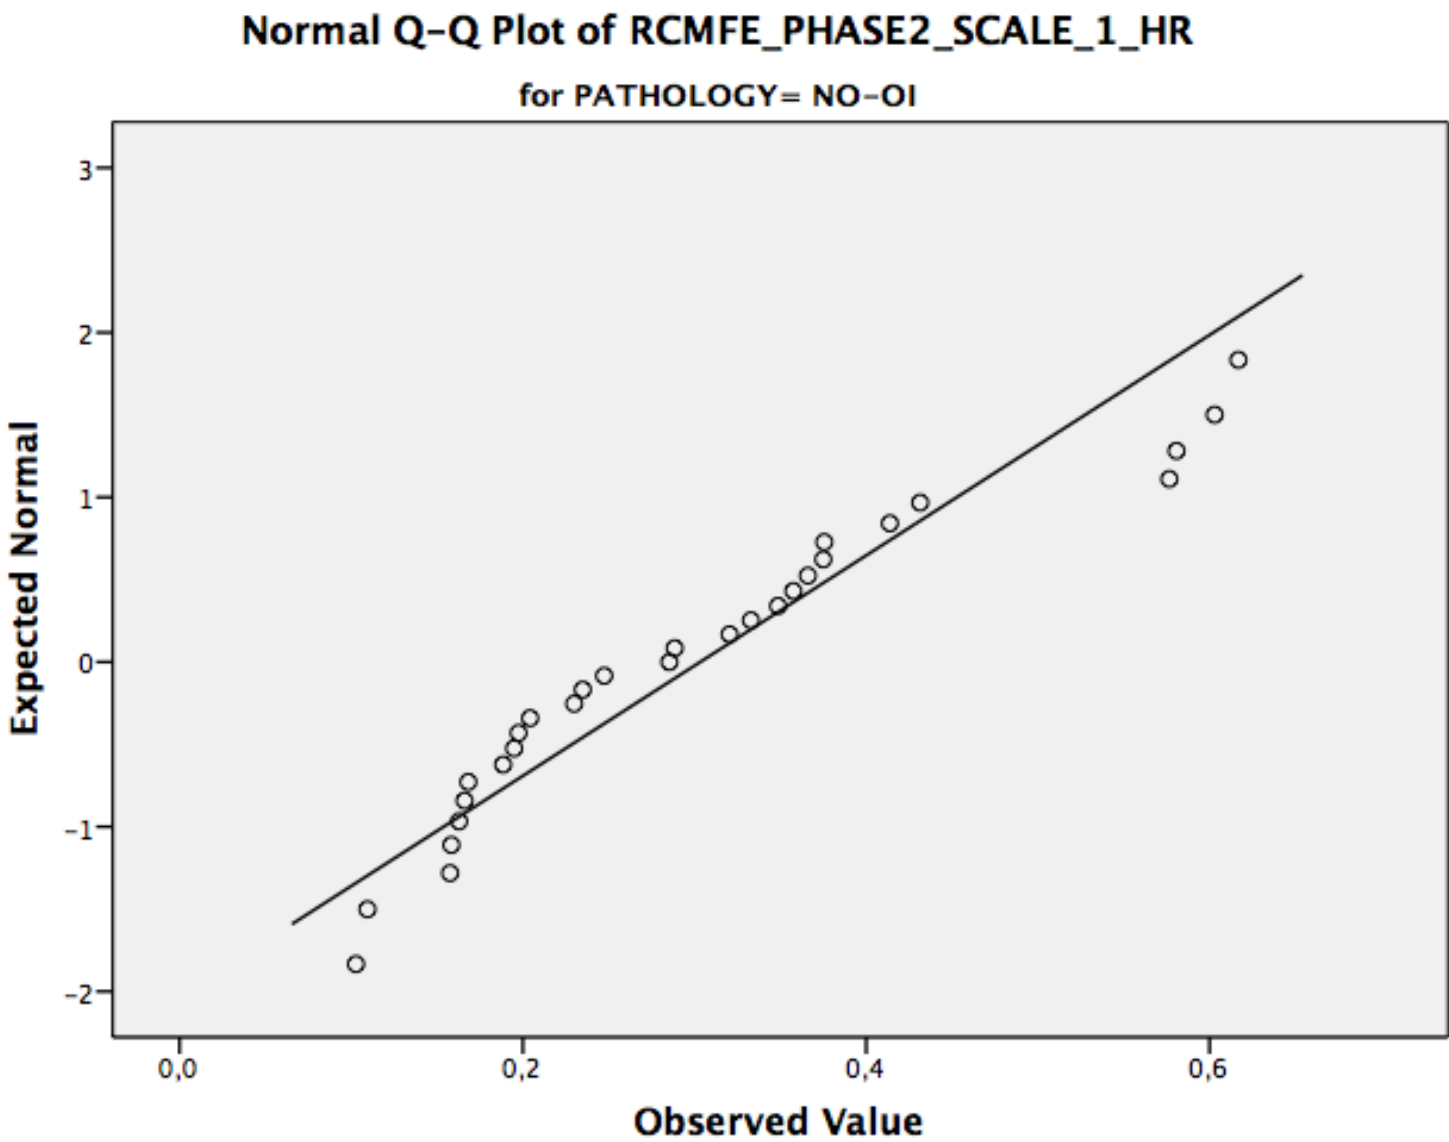

# Normal Q-Q Plot of RCMFE\_PHASE2\_SCALE\_1\_HR

for PATHOLOGY= OI

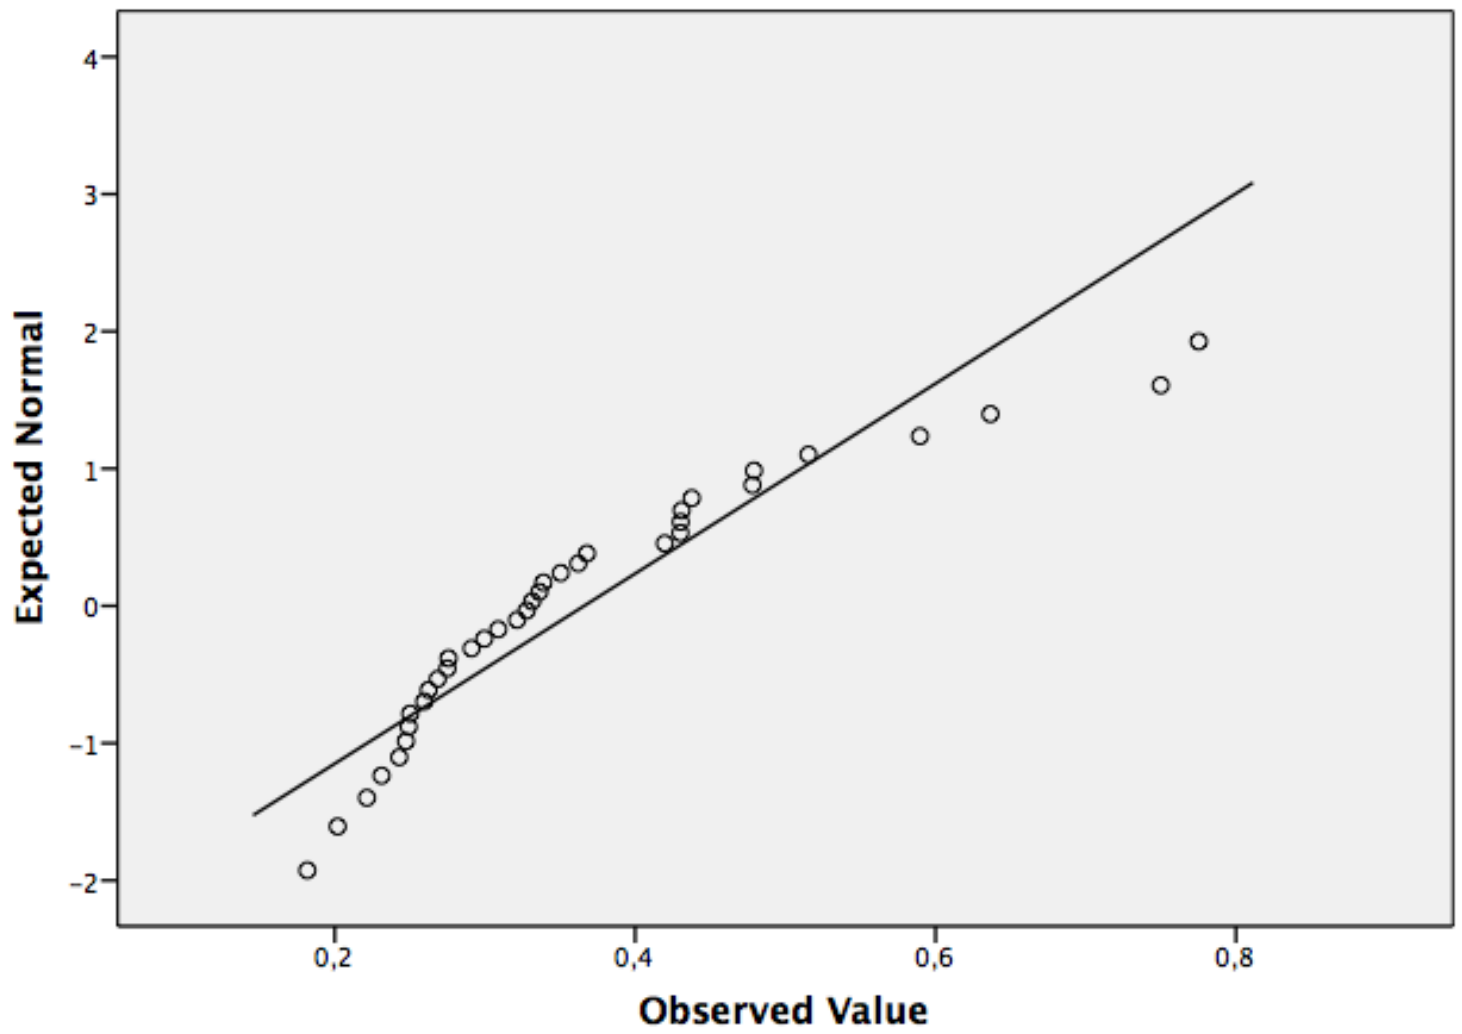

Normal Q-Q Plots

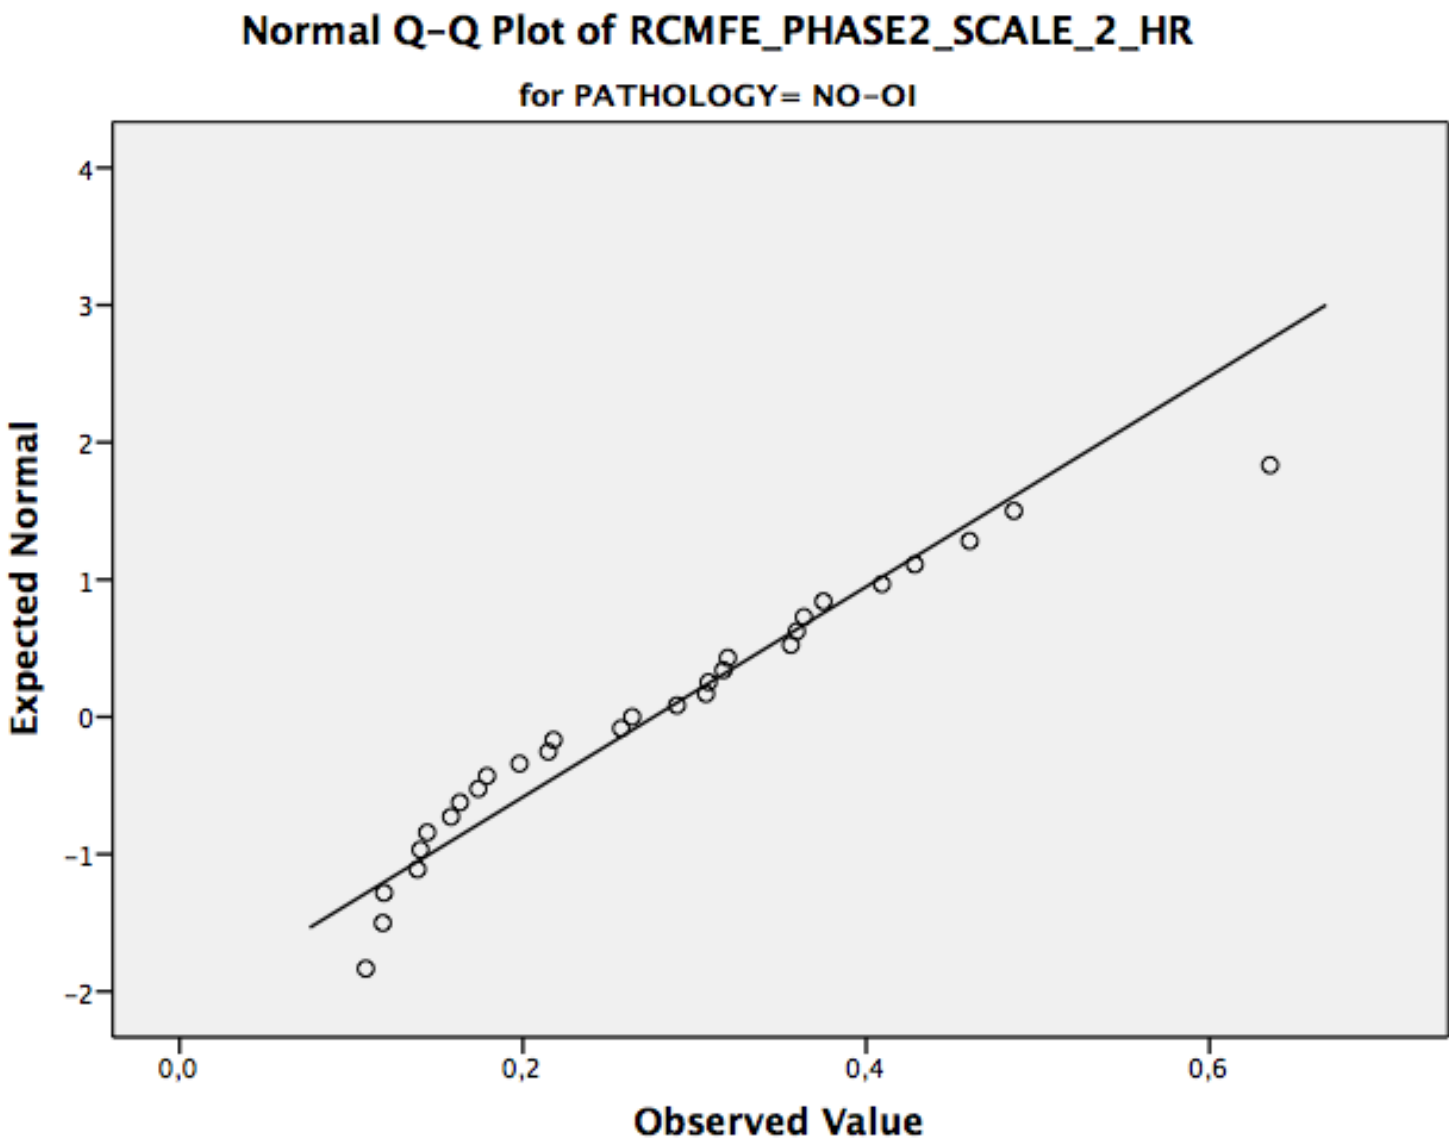

# Normal Q-Q Plot of RCMFE\_PHASE2\_SCALE\_2\_HR

for PATHOLOGY= OI

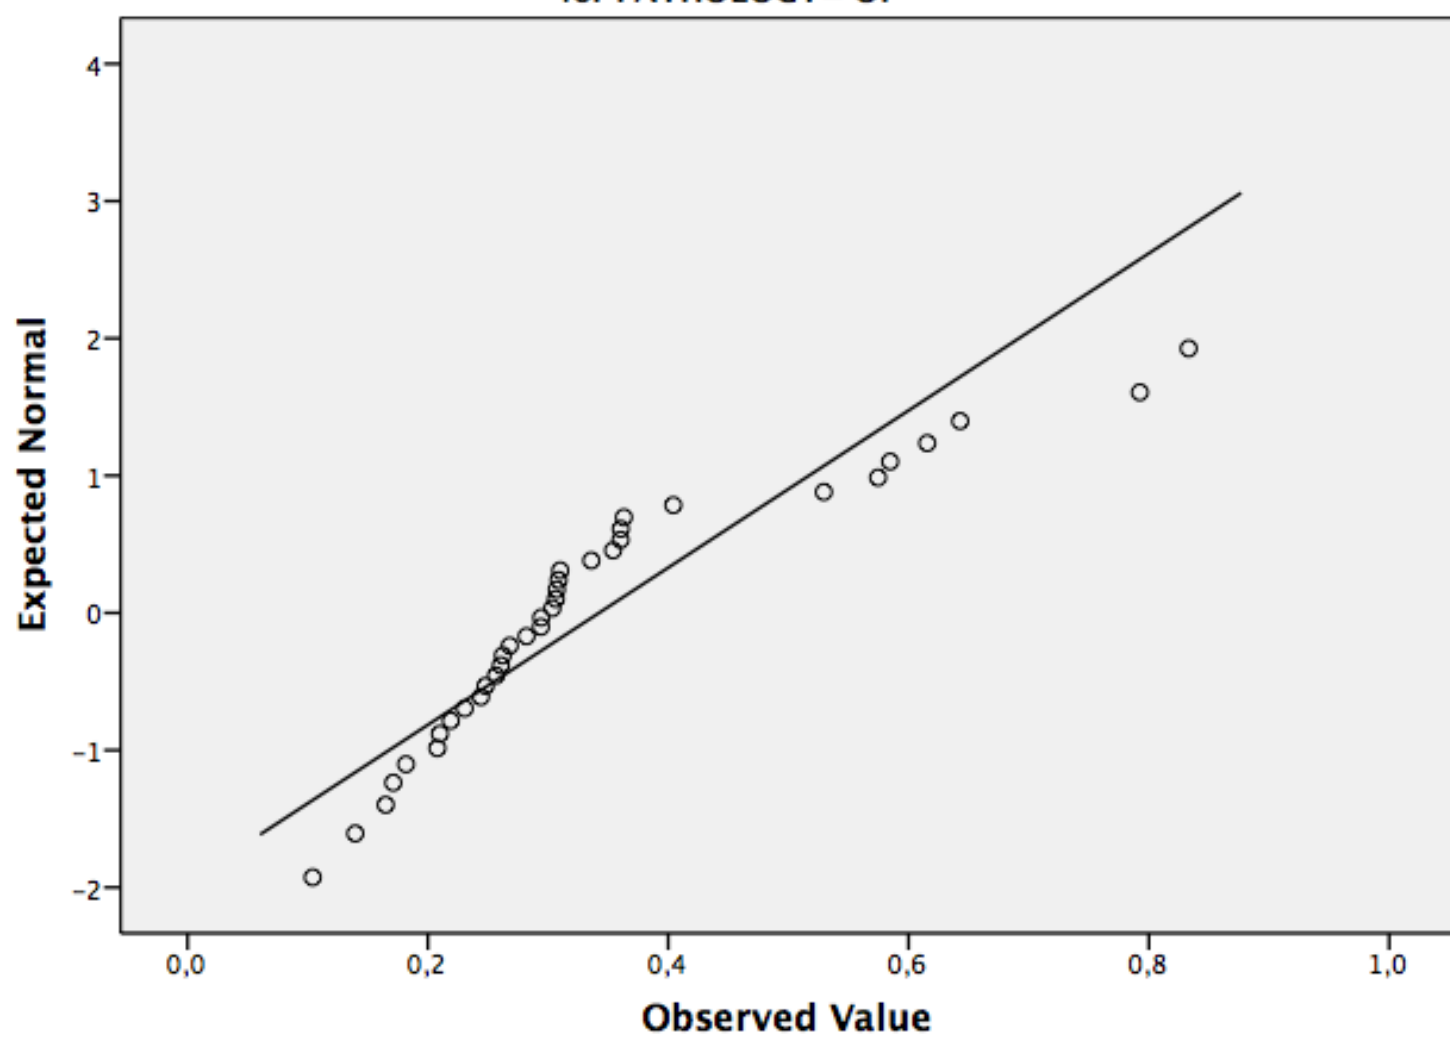



Normal Q-Q Plots

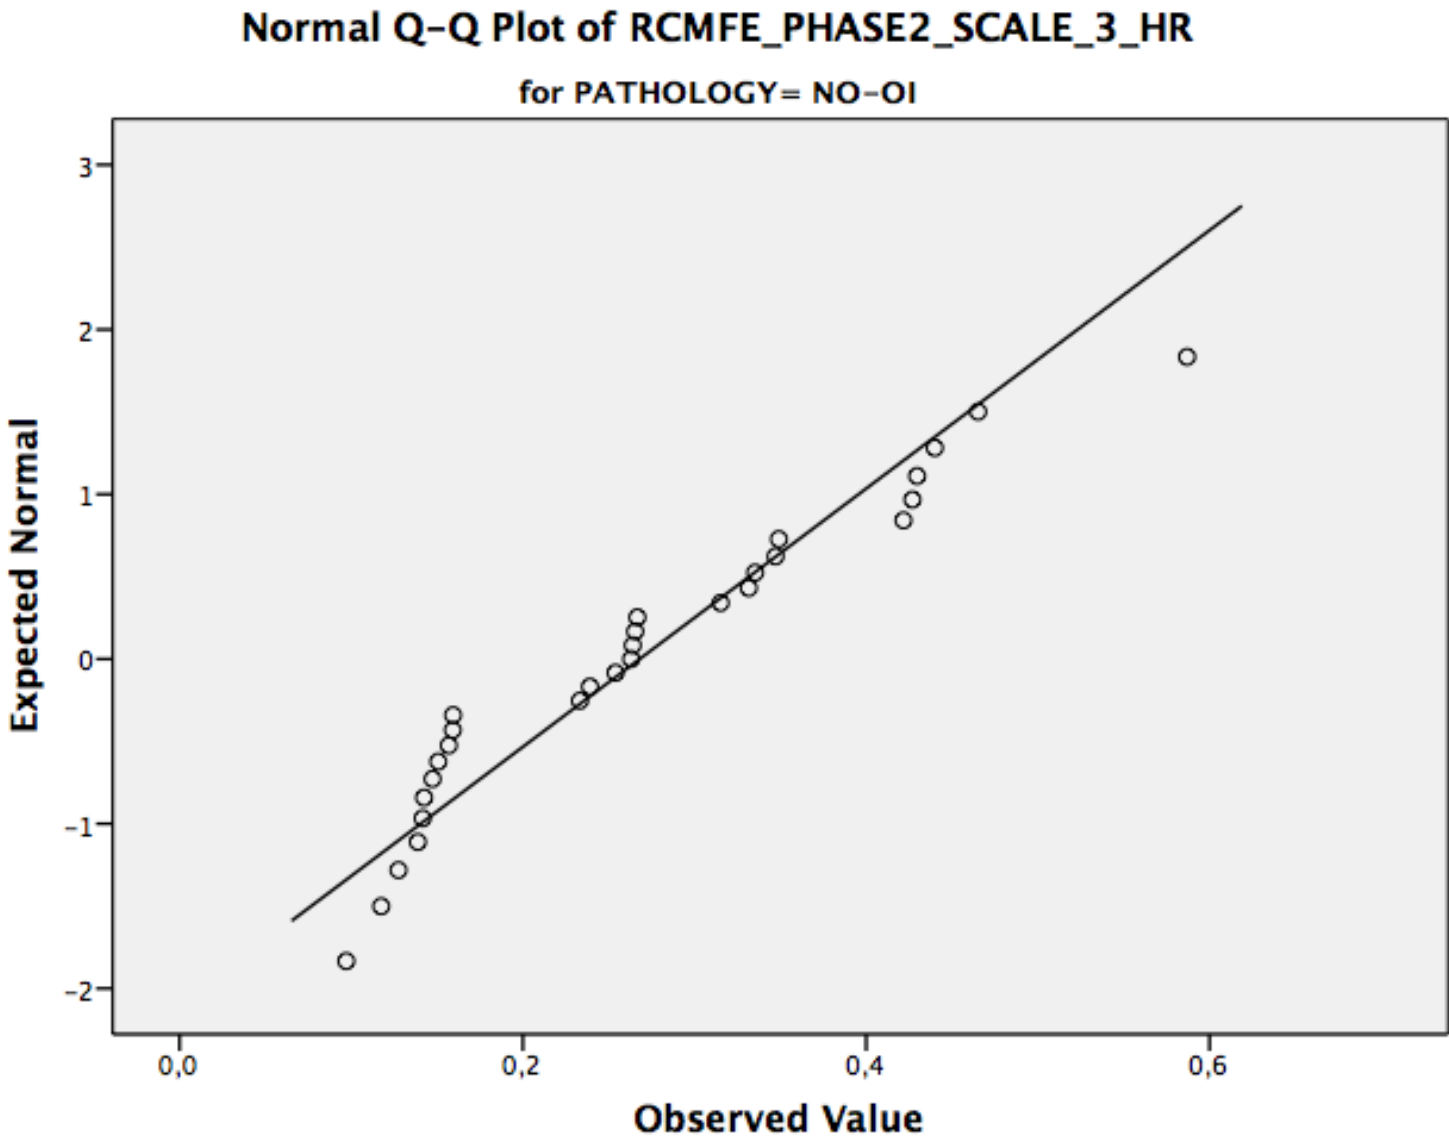

# Normal Q-Q Plot of RCMFE\_PHASE2\_SCALE\_3\_HR

for PATHOLOGY= OI

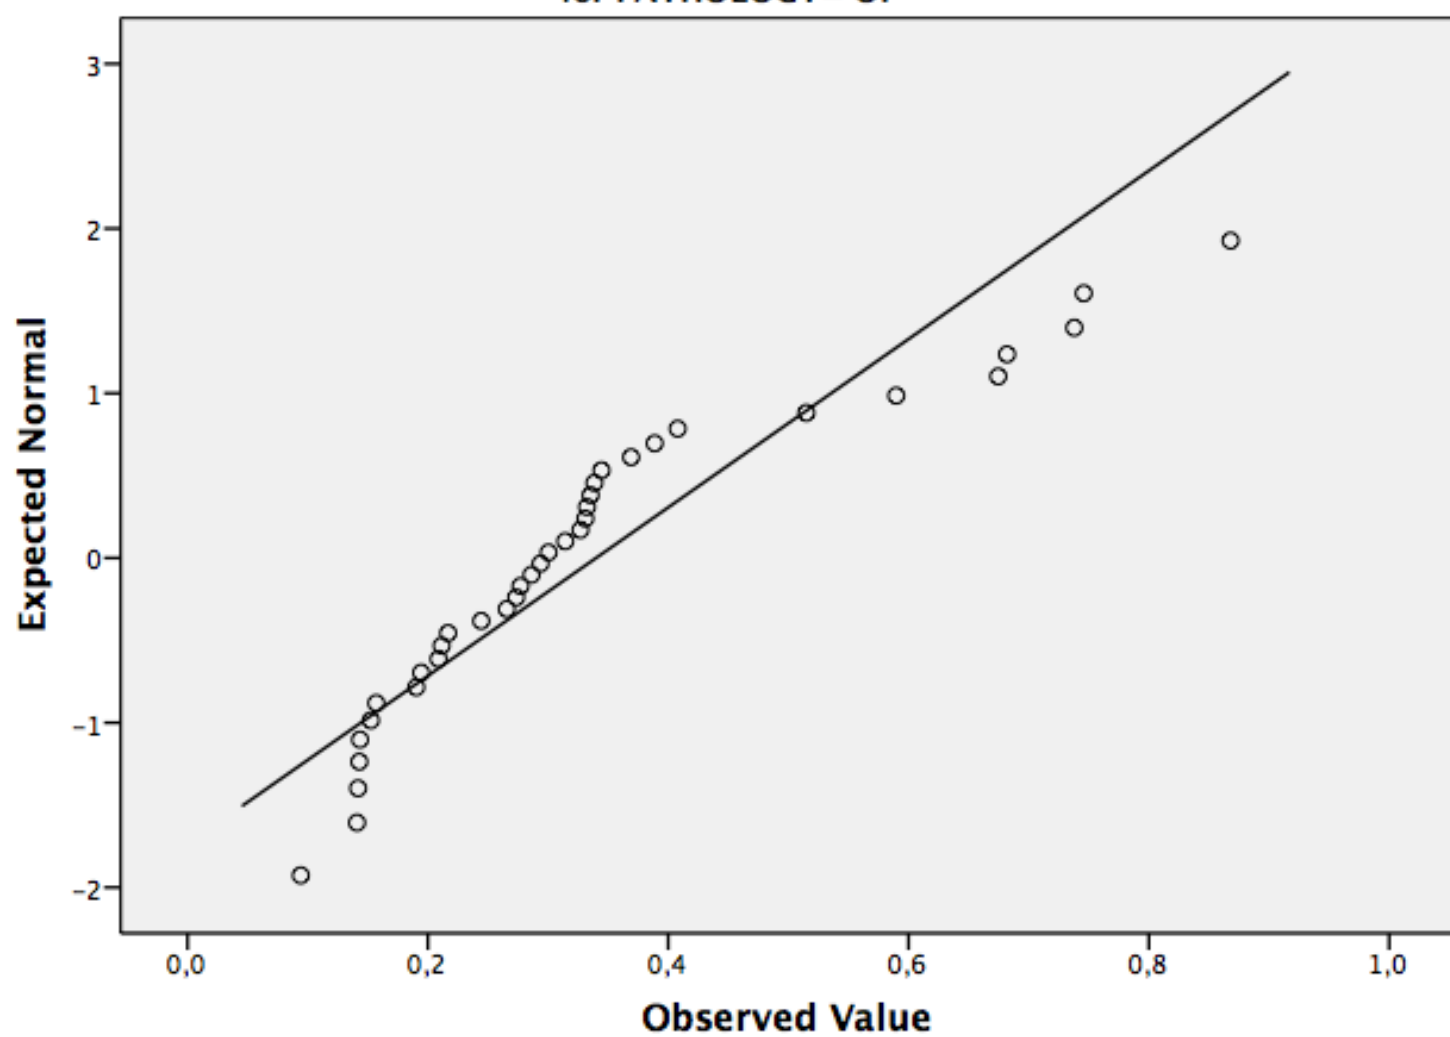

Normal Q-Q Plots

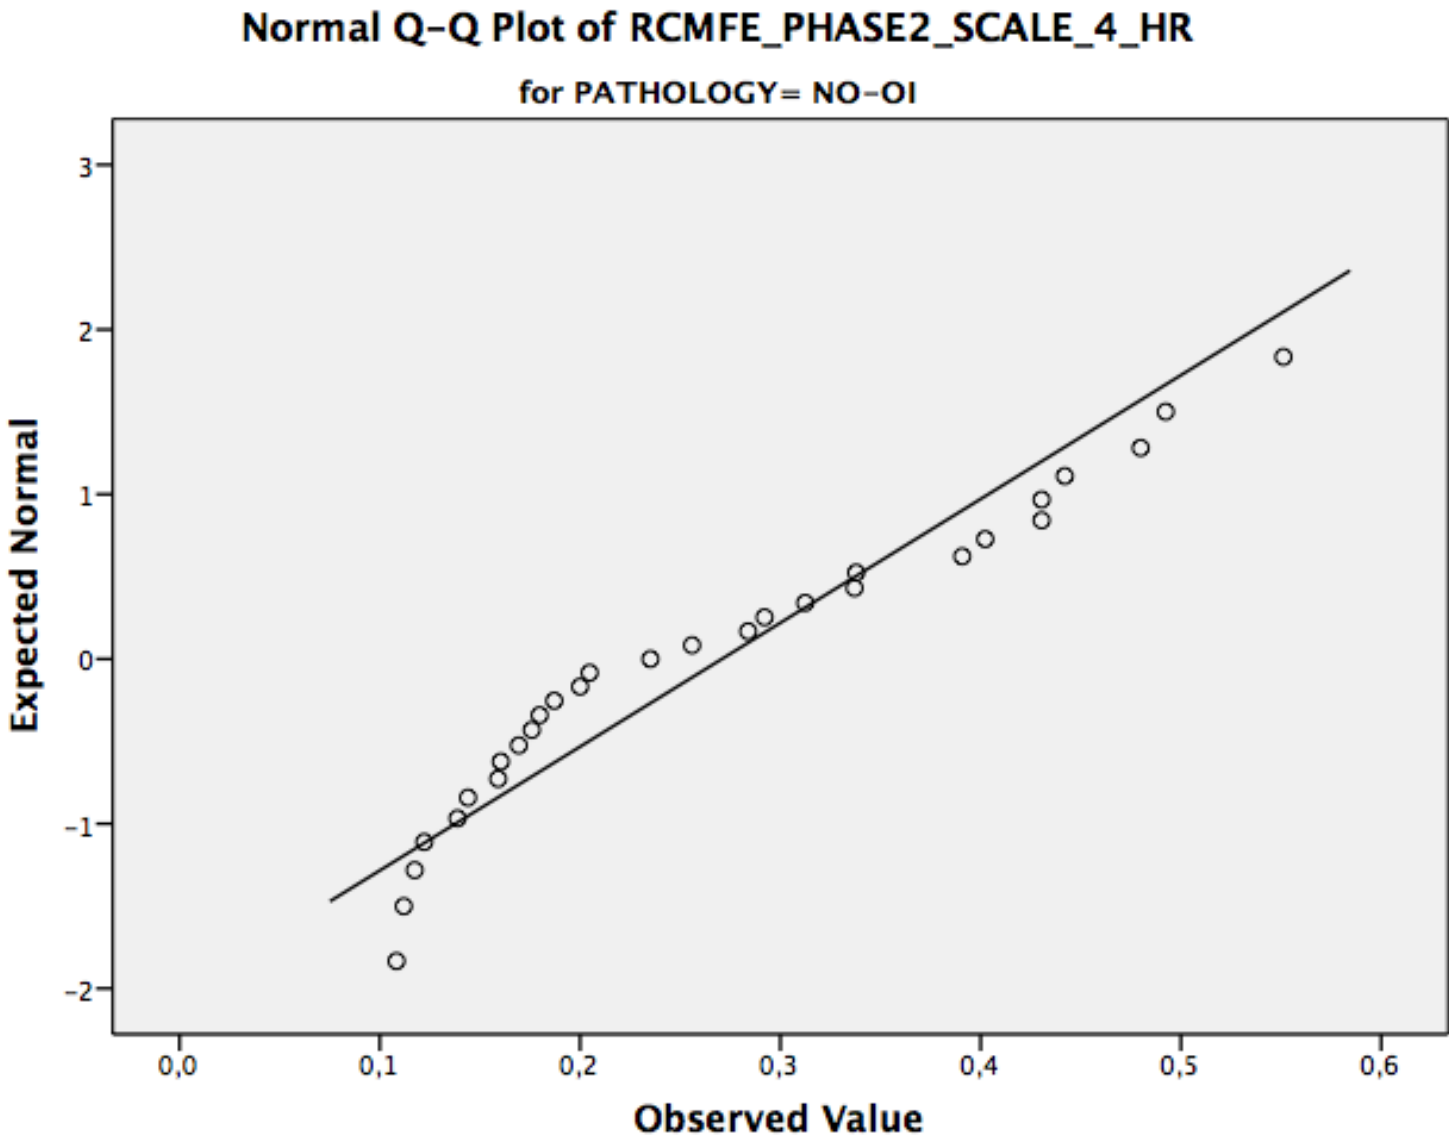

# Normal Q-Q Plot of RCMFE\_PHASE2\_SCALE\_4\_HR

for PATHOLOGY= OI

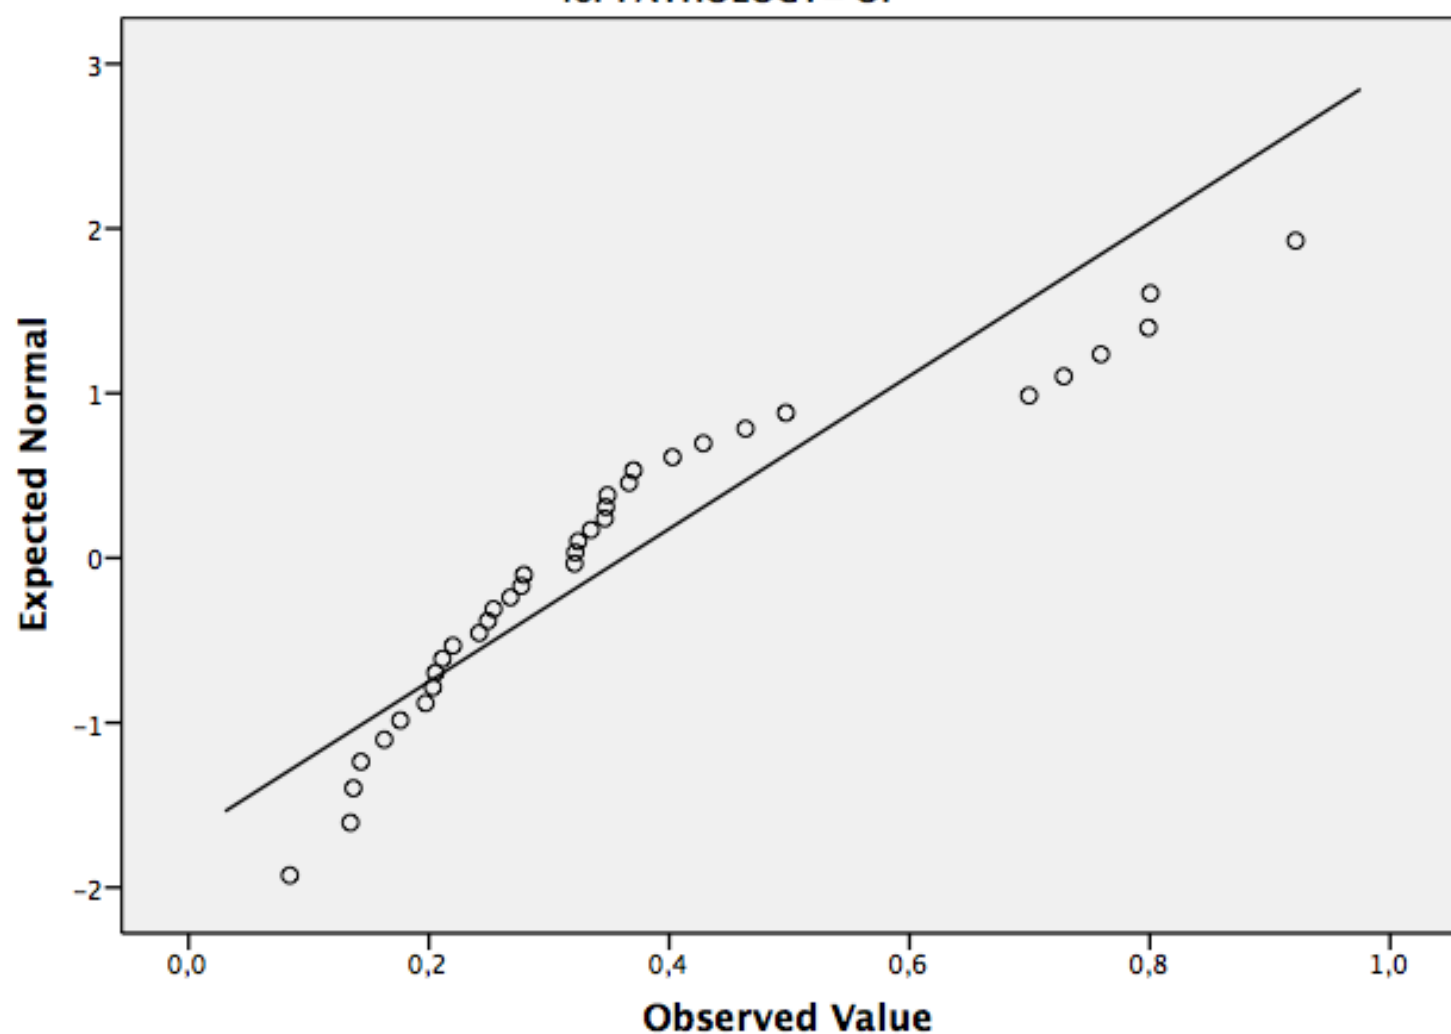

Normal Q-Q Plots

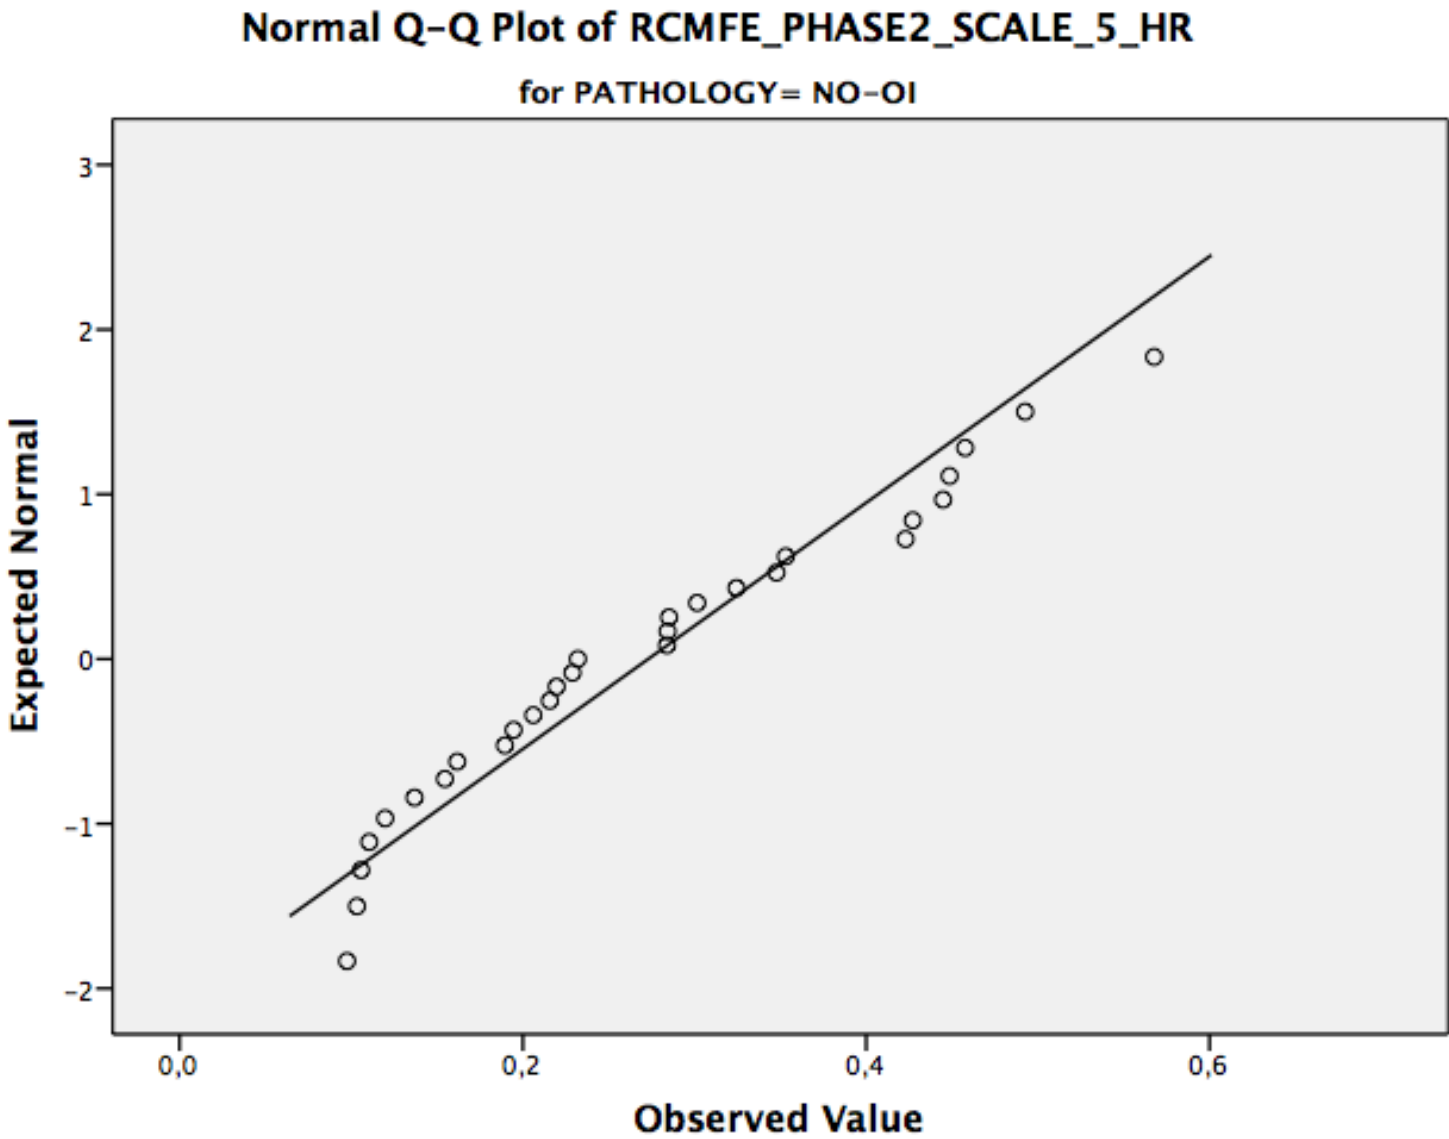

# Normal Q-Q Plot of RCMFE\_PHASE2\_SCALE\_5\_HR

for PATHOLOGY= OI

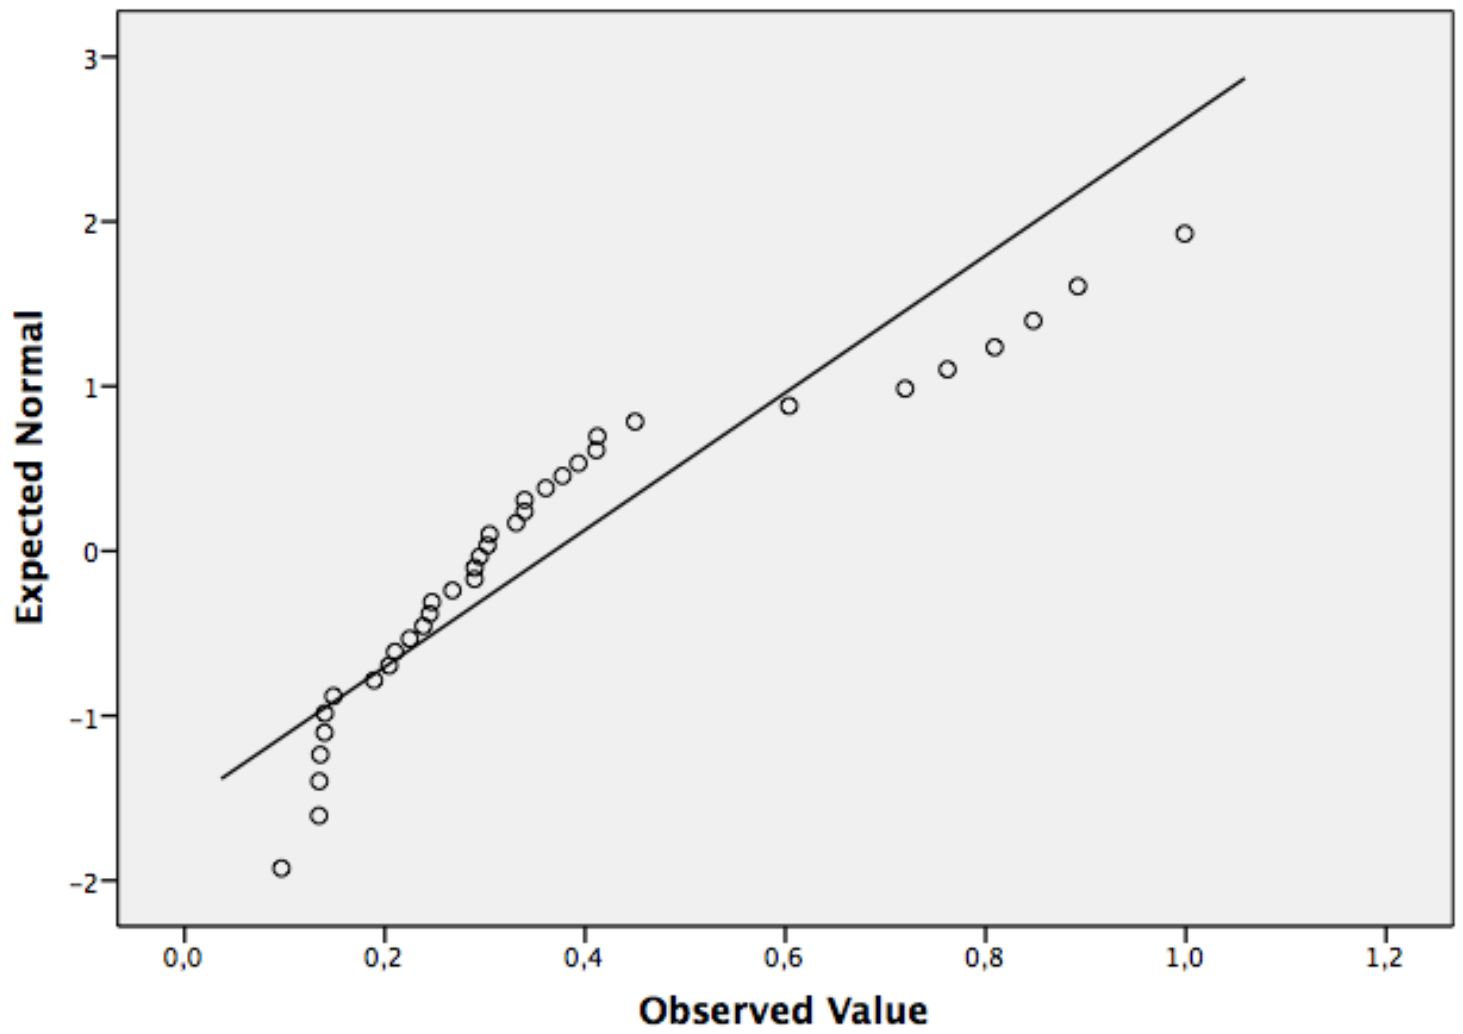

Normal Q-Q Plots

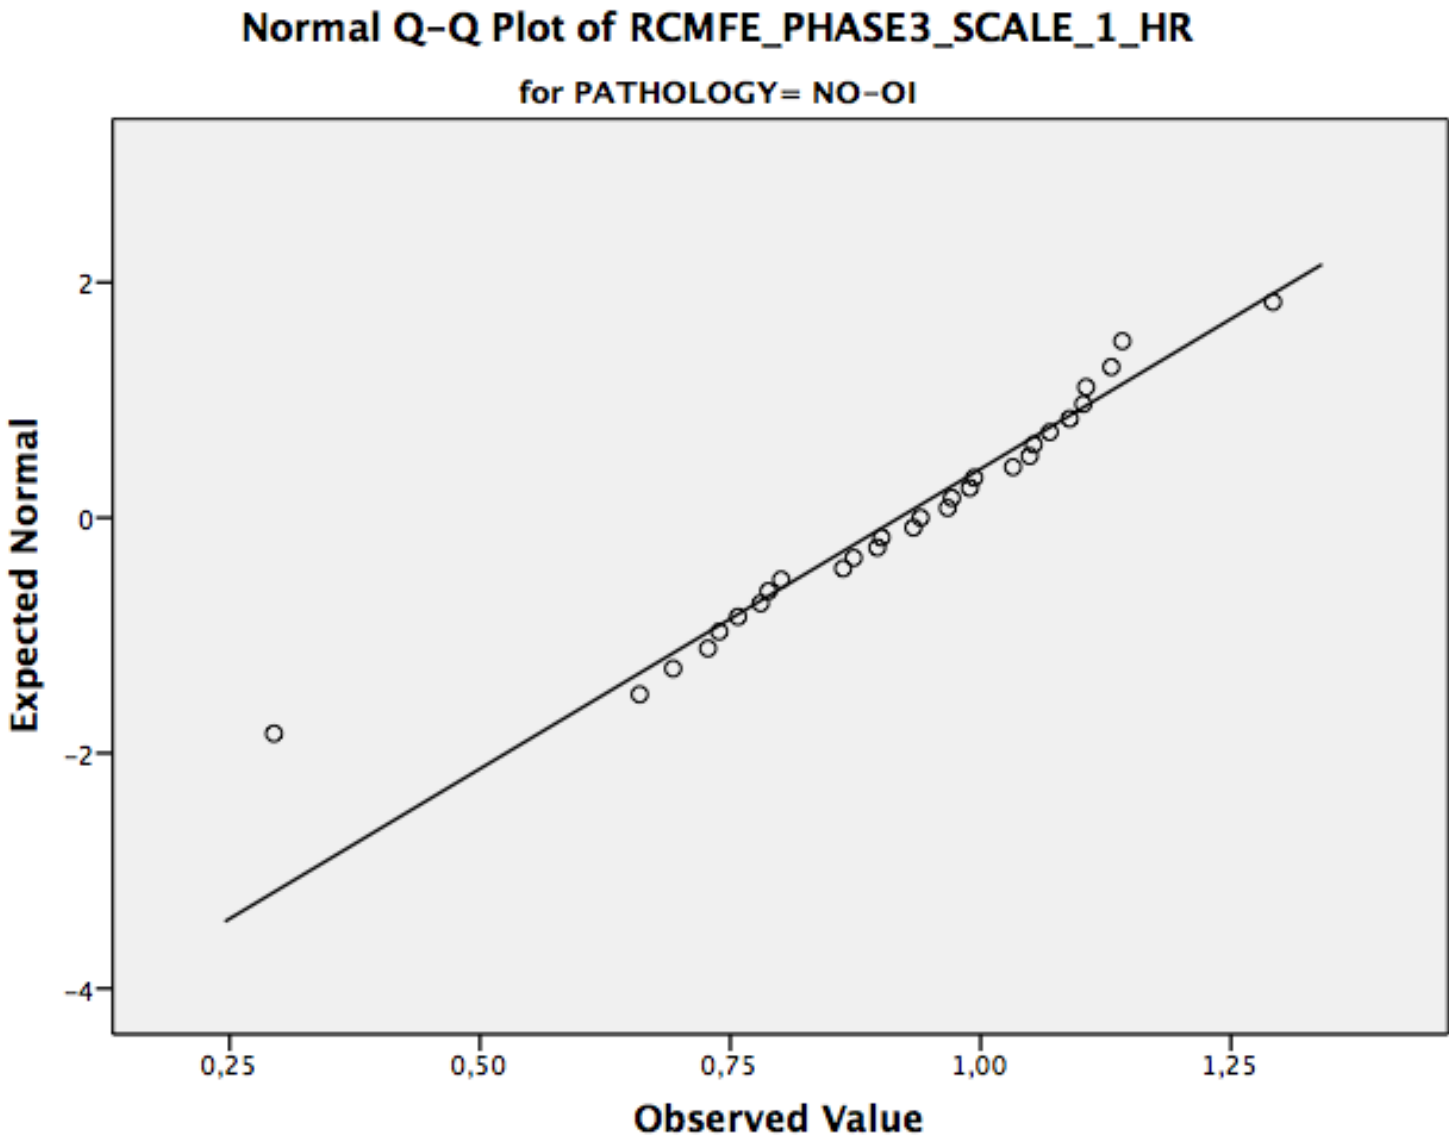

# Normal Q-Q Plot of RCMFE\_PHASE3\_SCALE\_1\_HR

for PATHOLOGY= OI

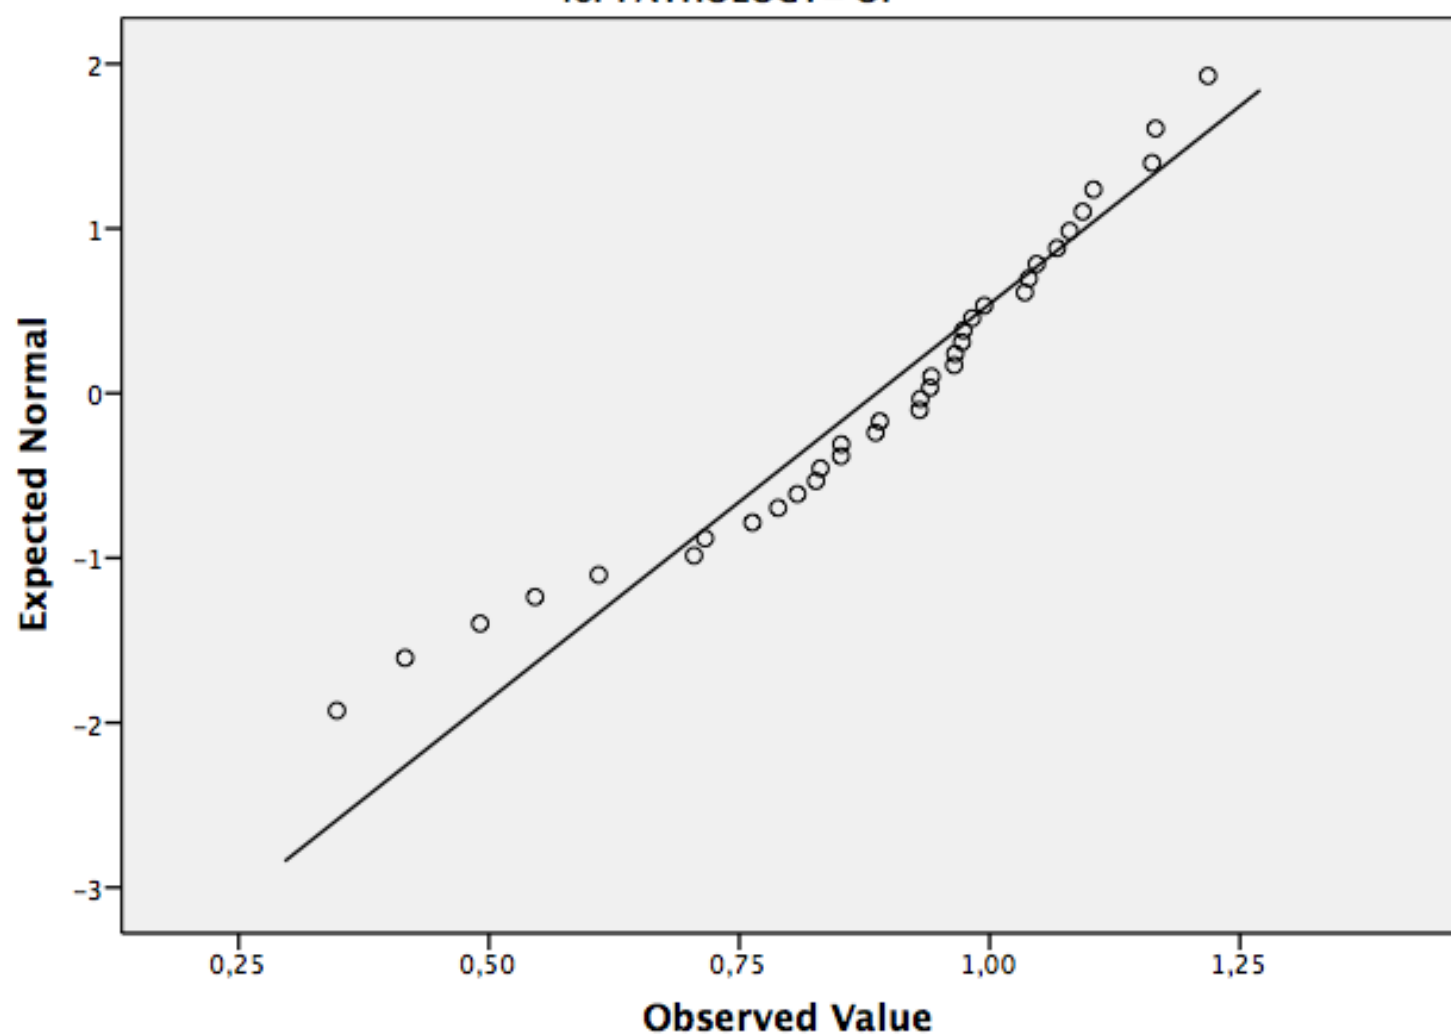



Normal Q-Q Plots

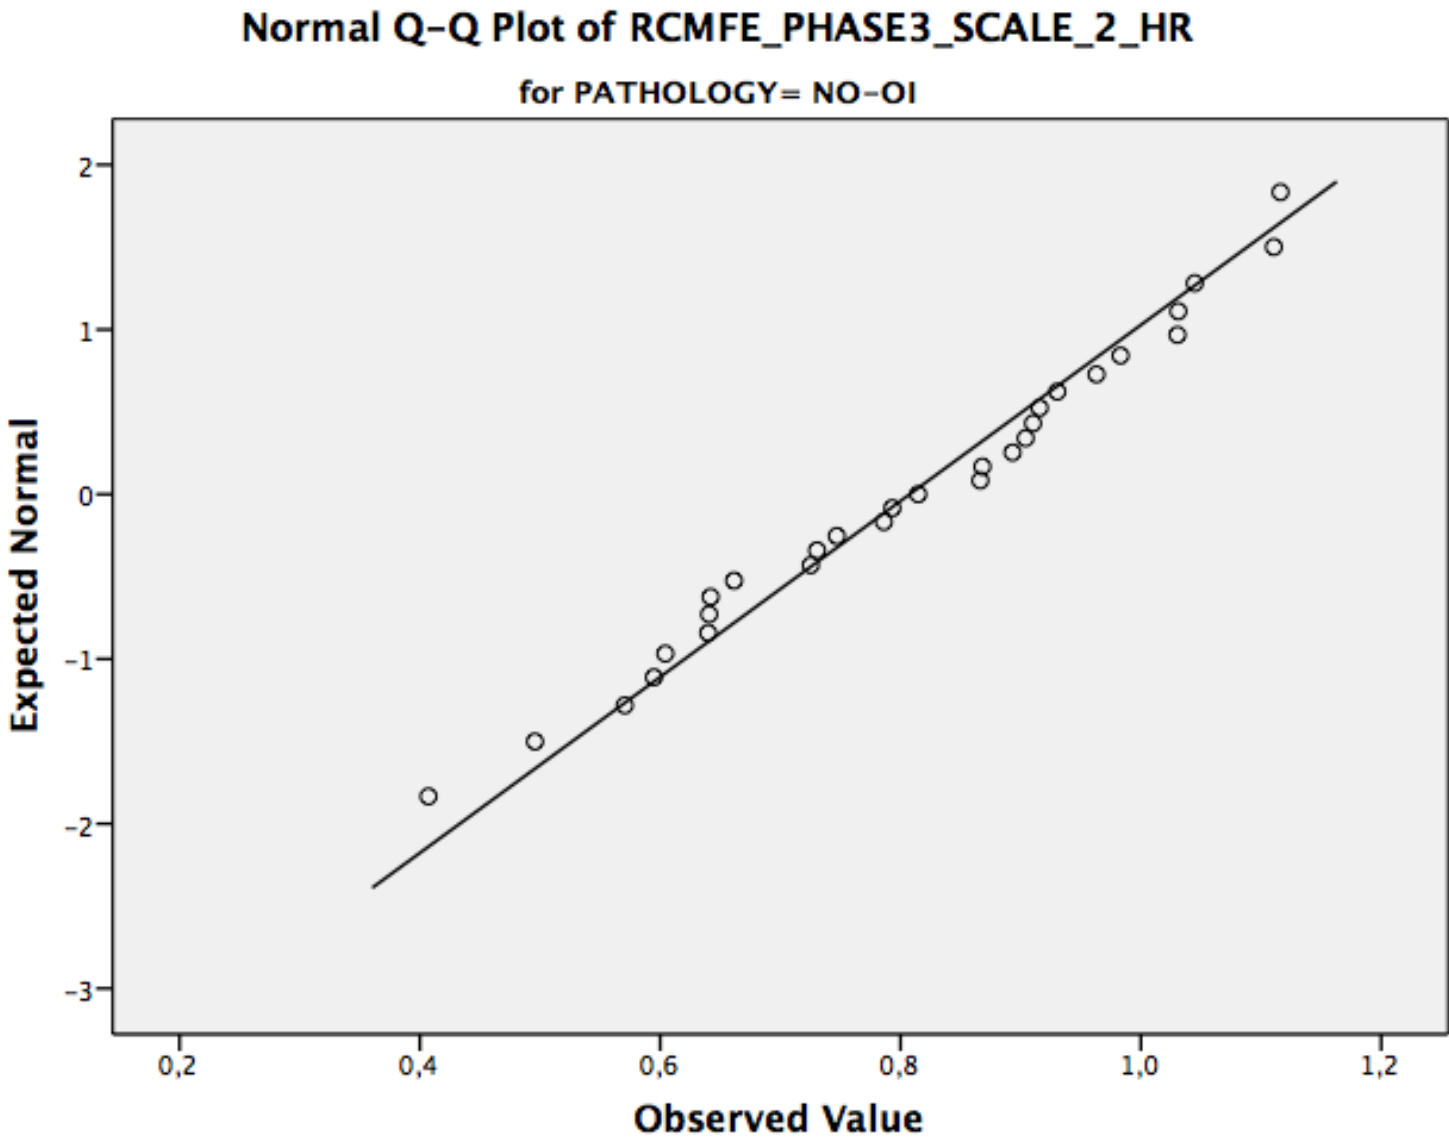

# Normal Q-Q Plot of RCMFE\_PHASE3\_SCALE\_2\_HR

for PATHOLOGY= OI

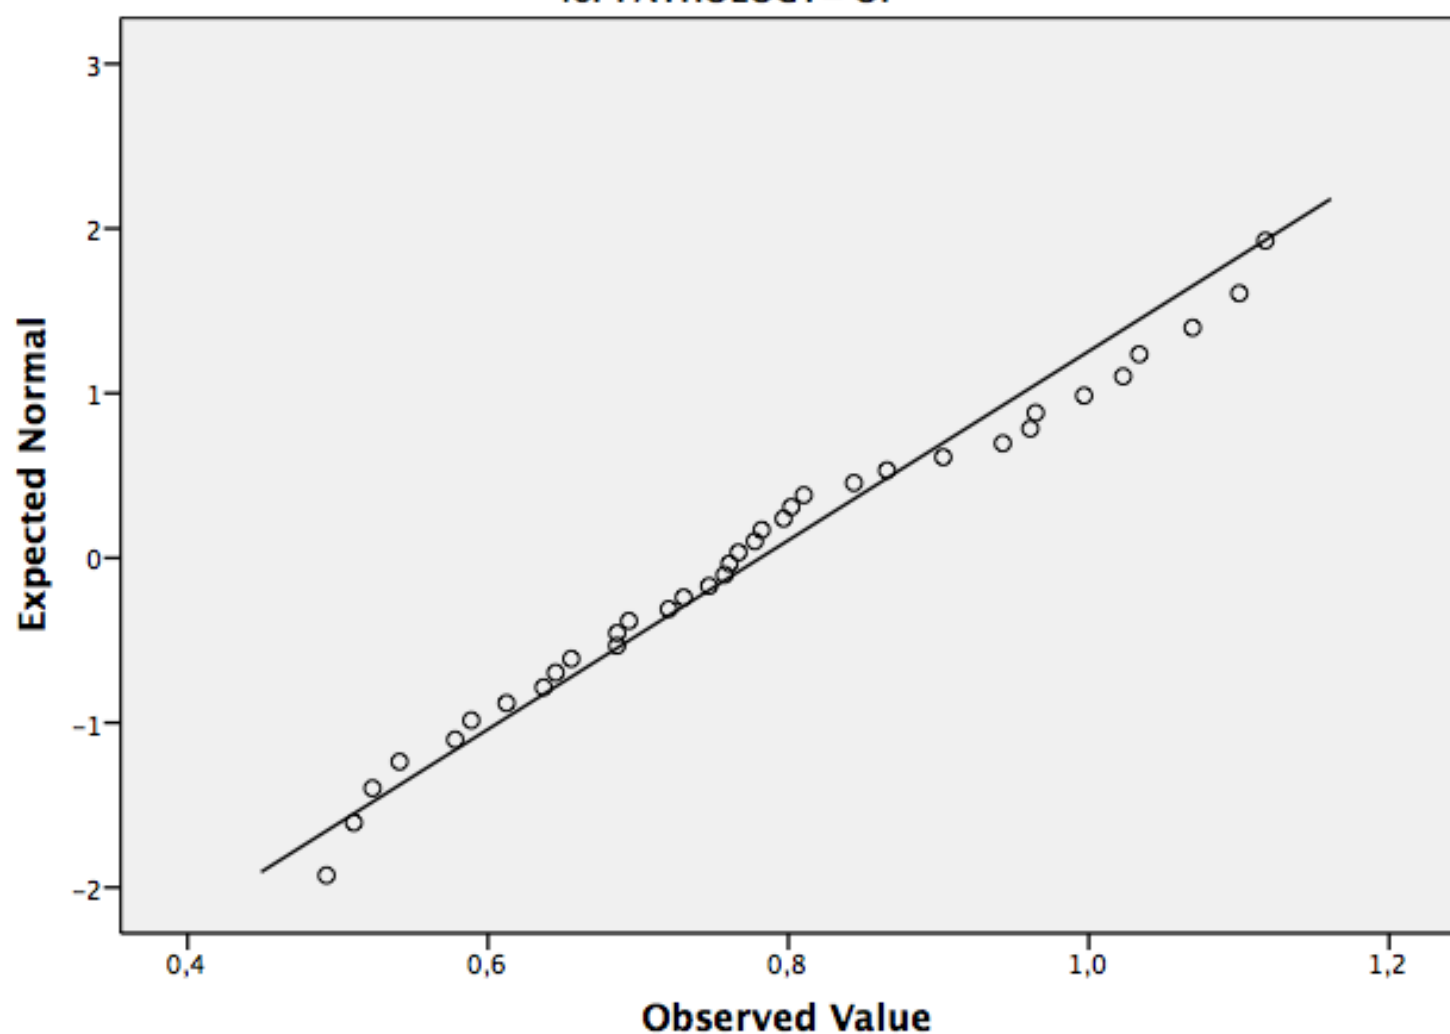

Normal Q-Q Plots

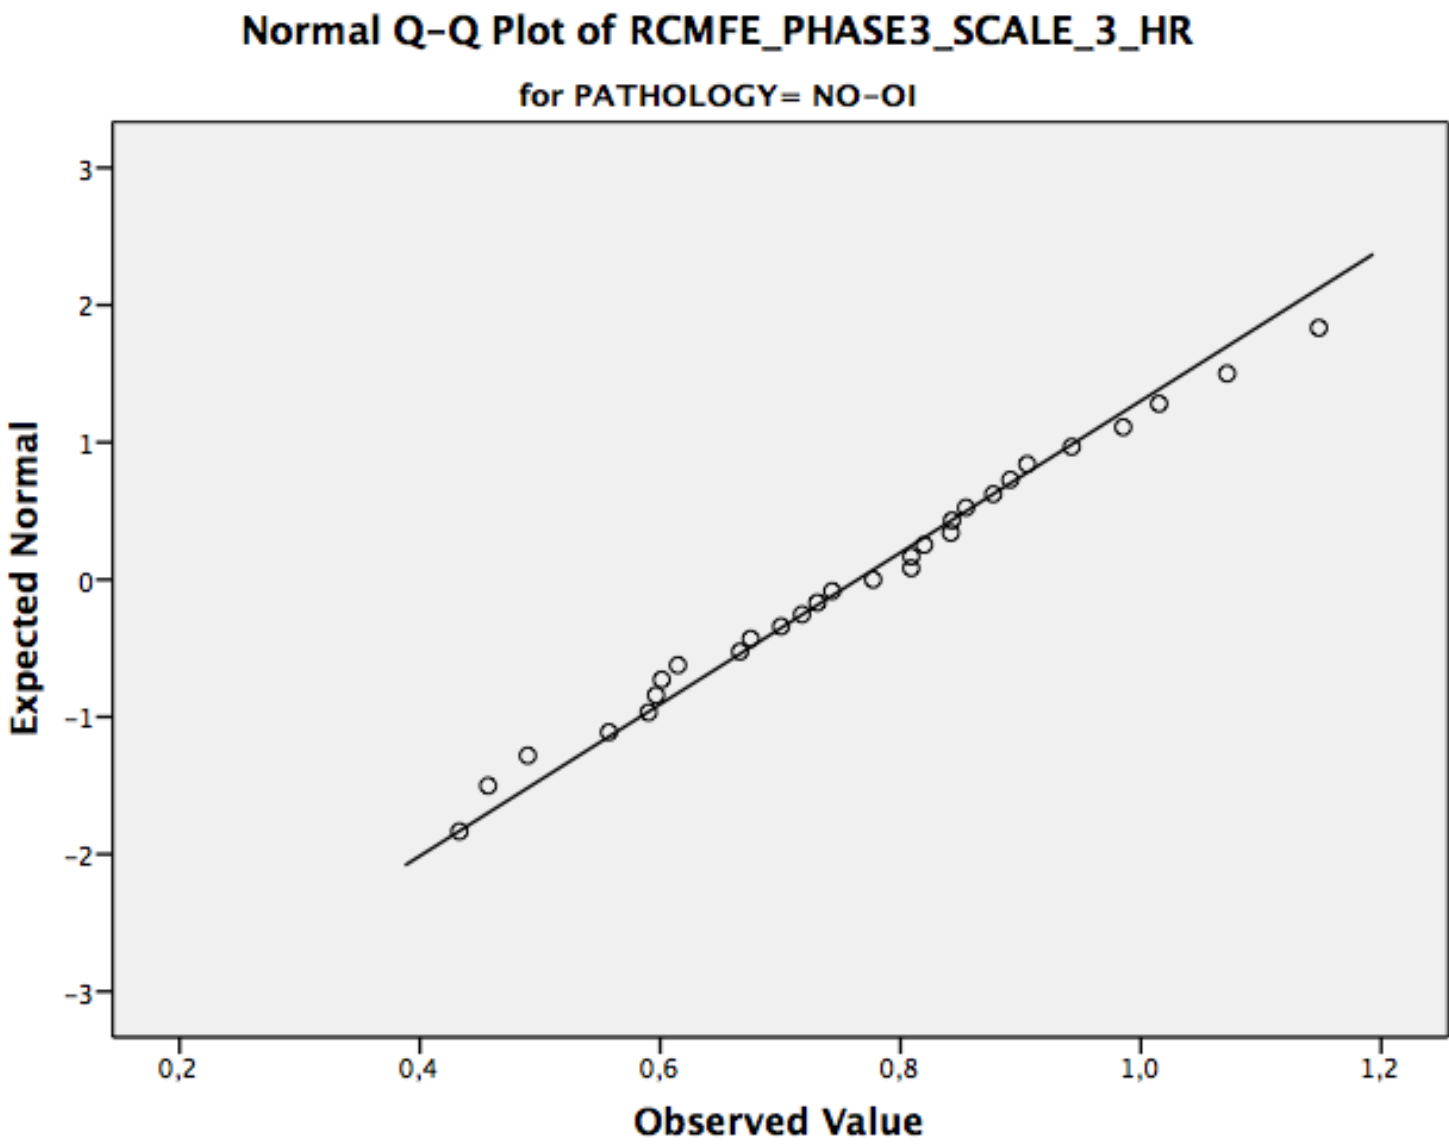

# Normal Q-Q Plot of RCMFE\_PHASE3\_SCALE\_3\_HR

for PATHOLOGY= OI

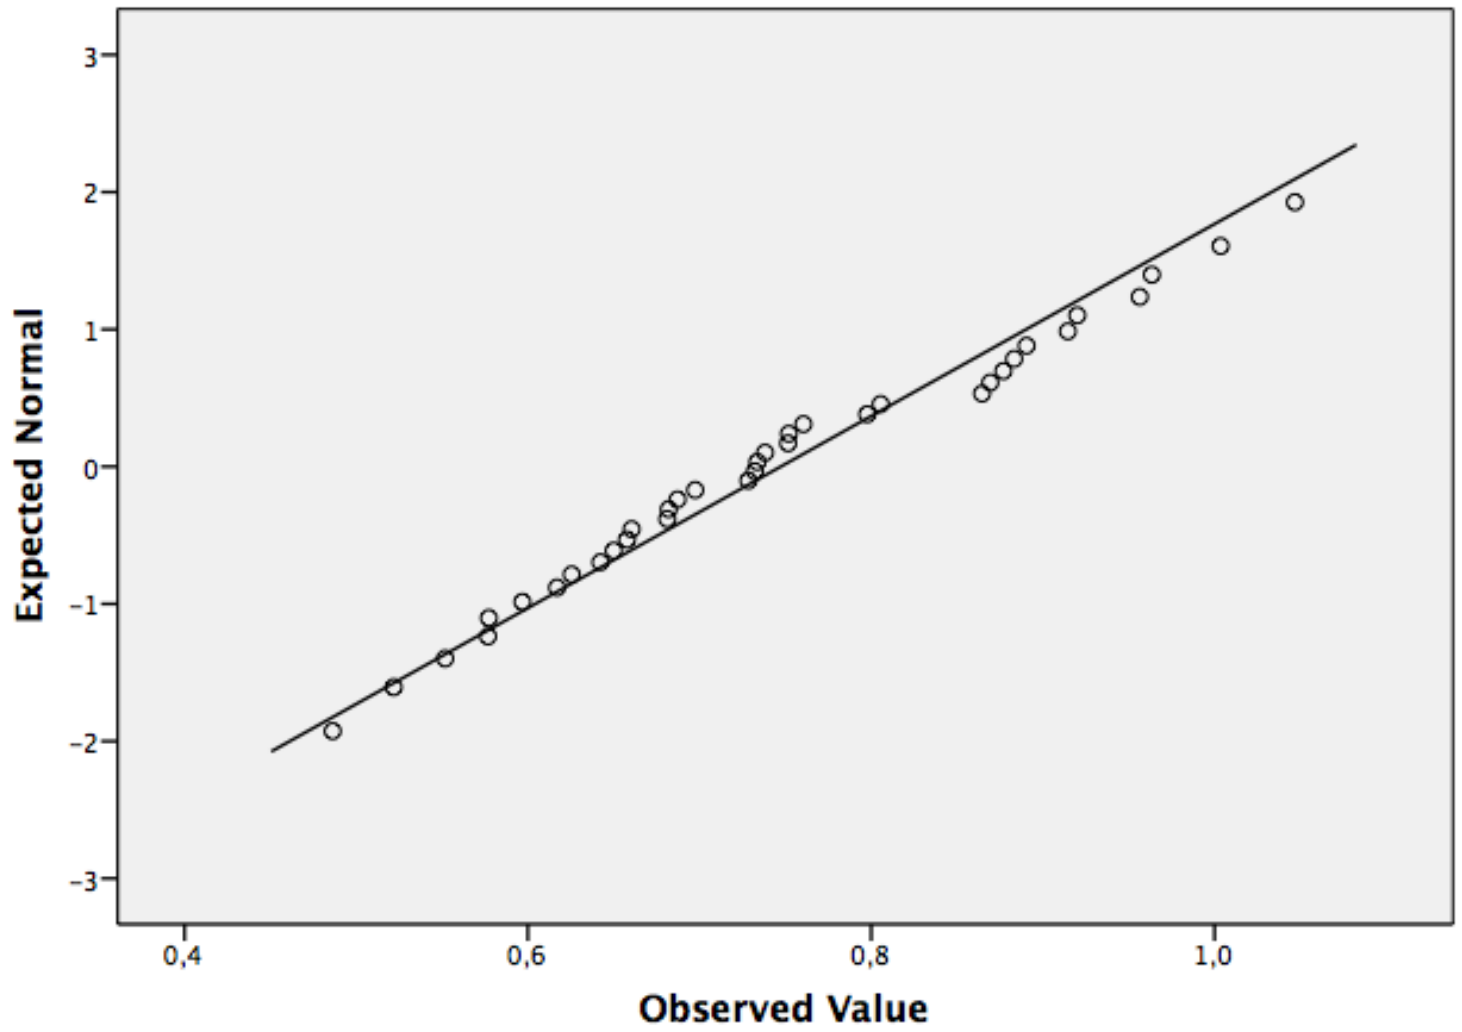

Normal Q-Q Plots

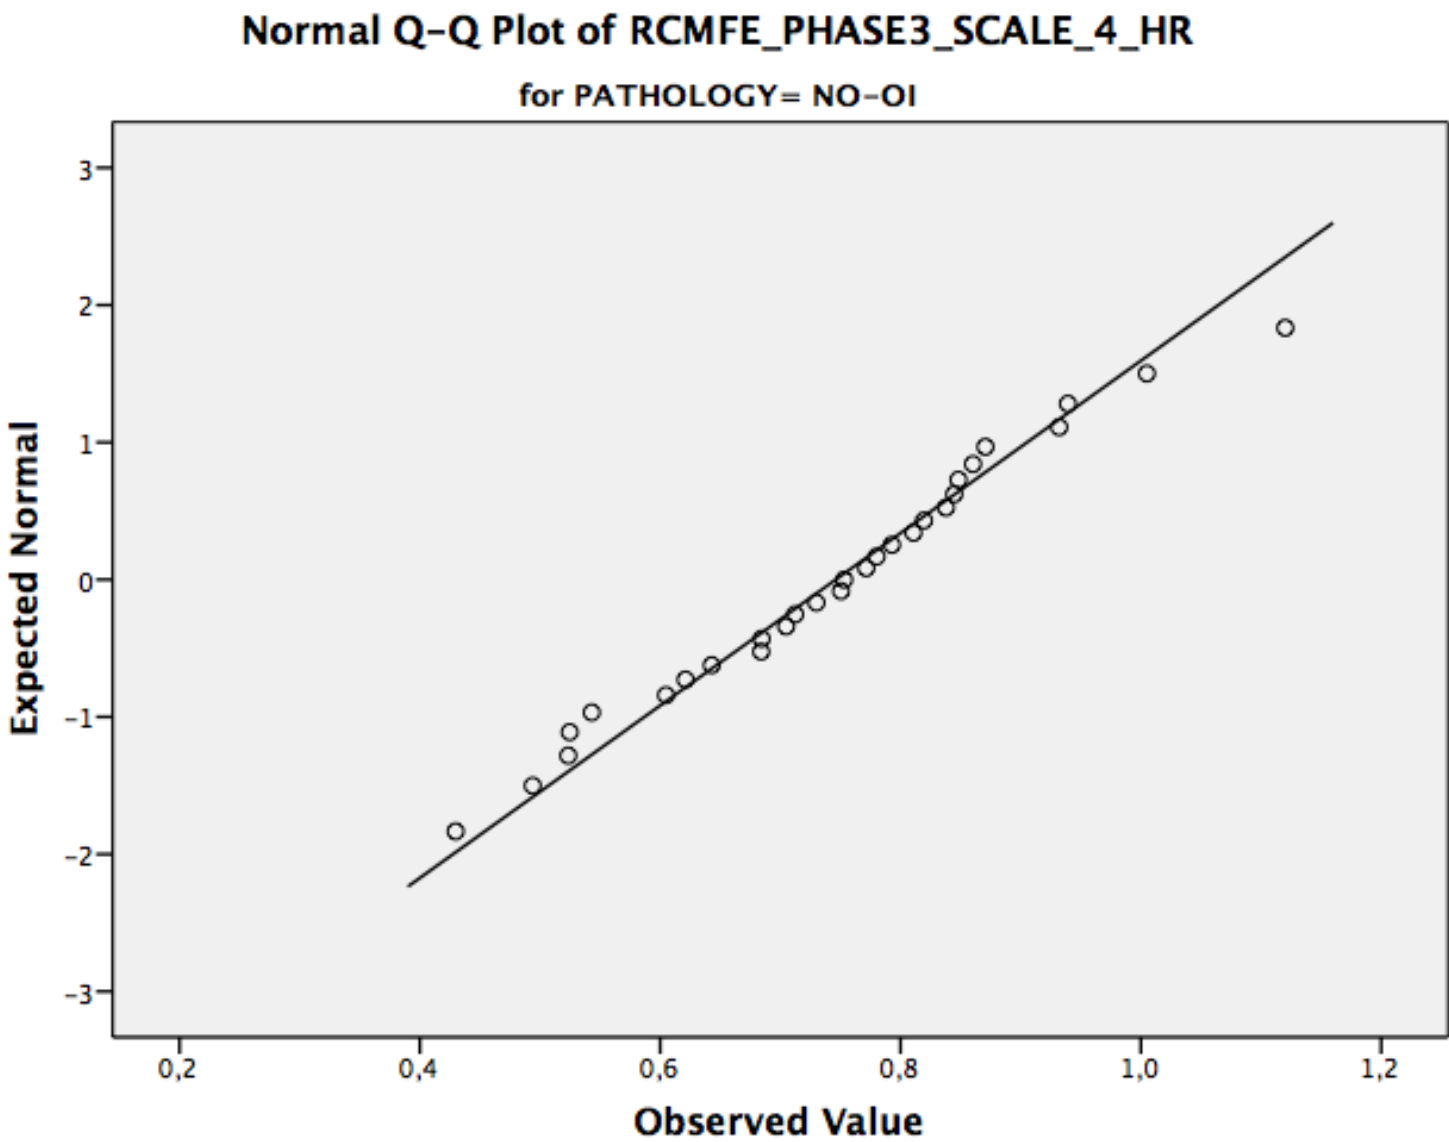

# Normal Q-Q Plot of RCMFE\_PHASE3\_SCALE\_4\_HR

for PATHOLOGY= OI

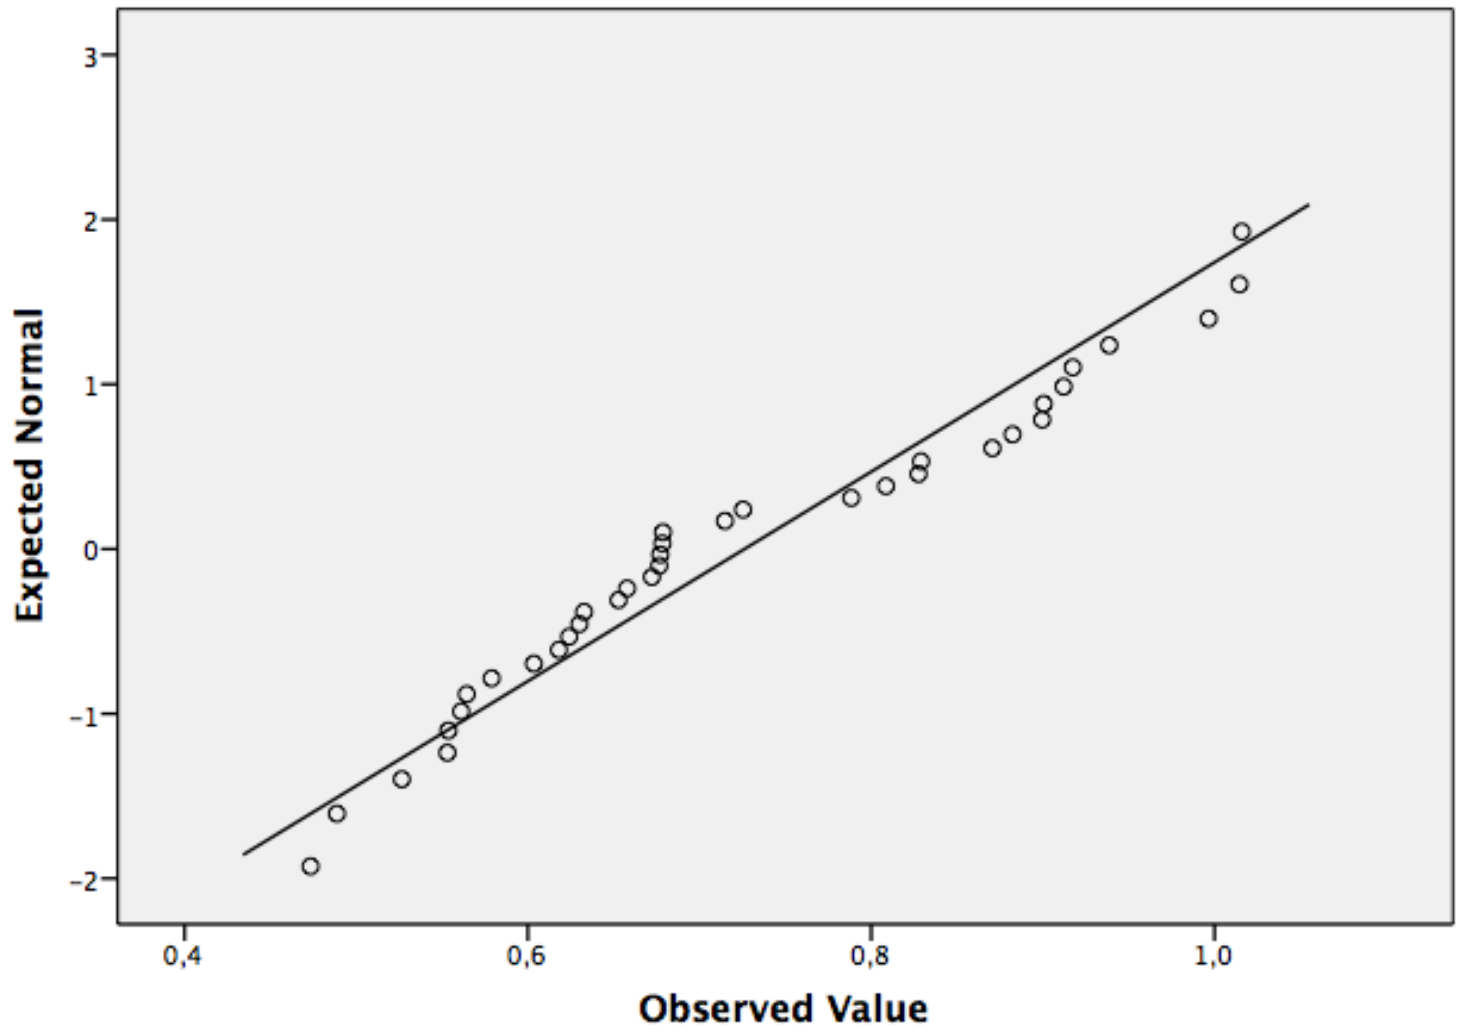

Normal Q-Q Plots

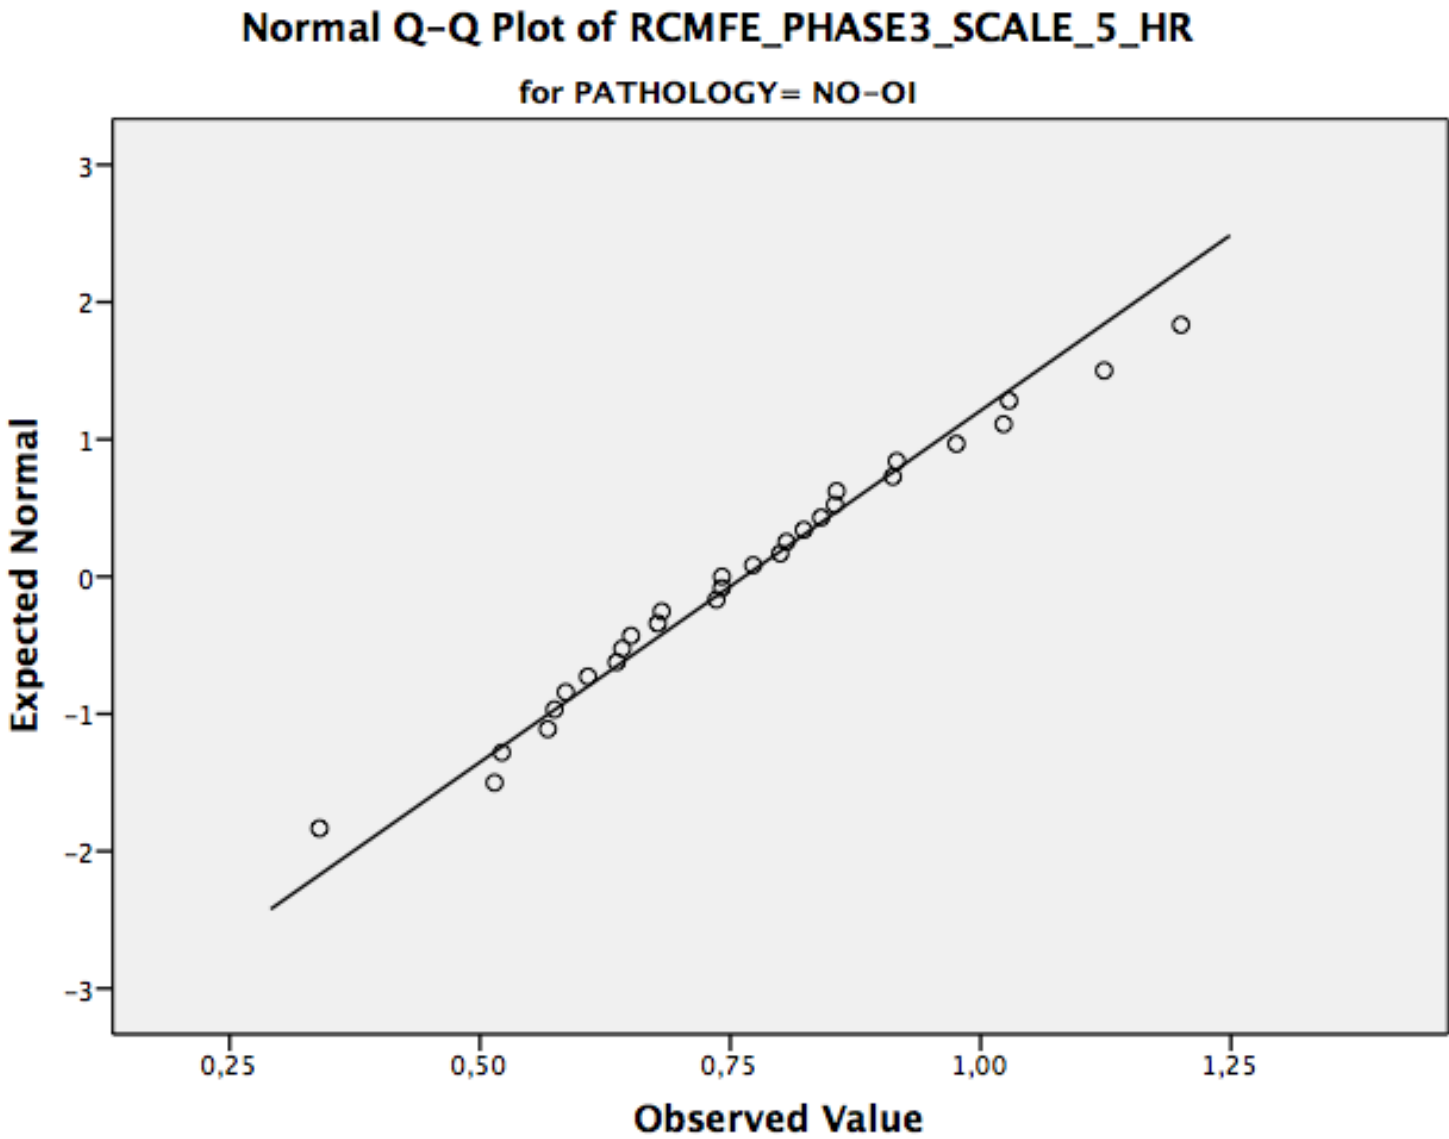

# Normal Q-Q Plot of RCMFE\_PHASE3\_SCALE\_5\_HR

for PATHOLOGY= OI

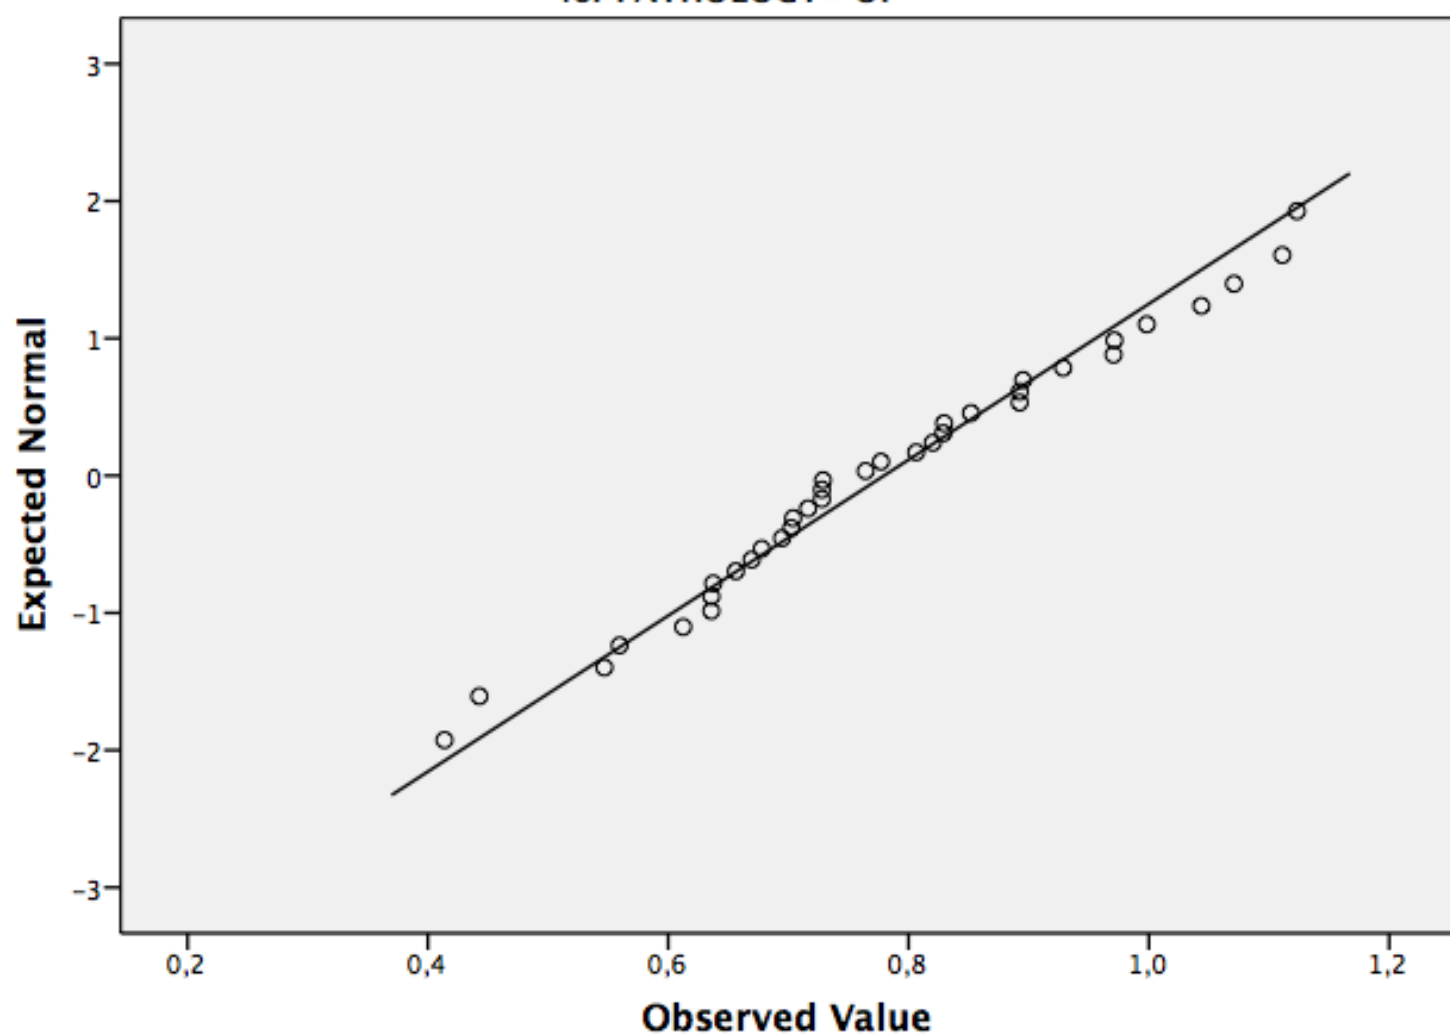



Normal Q-Q Plots

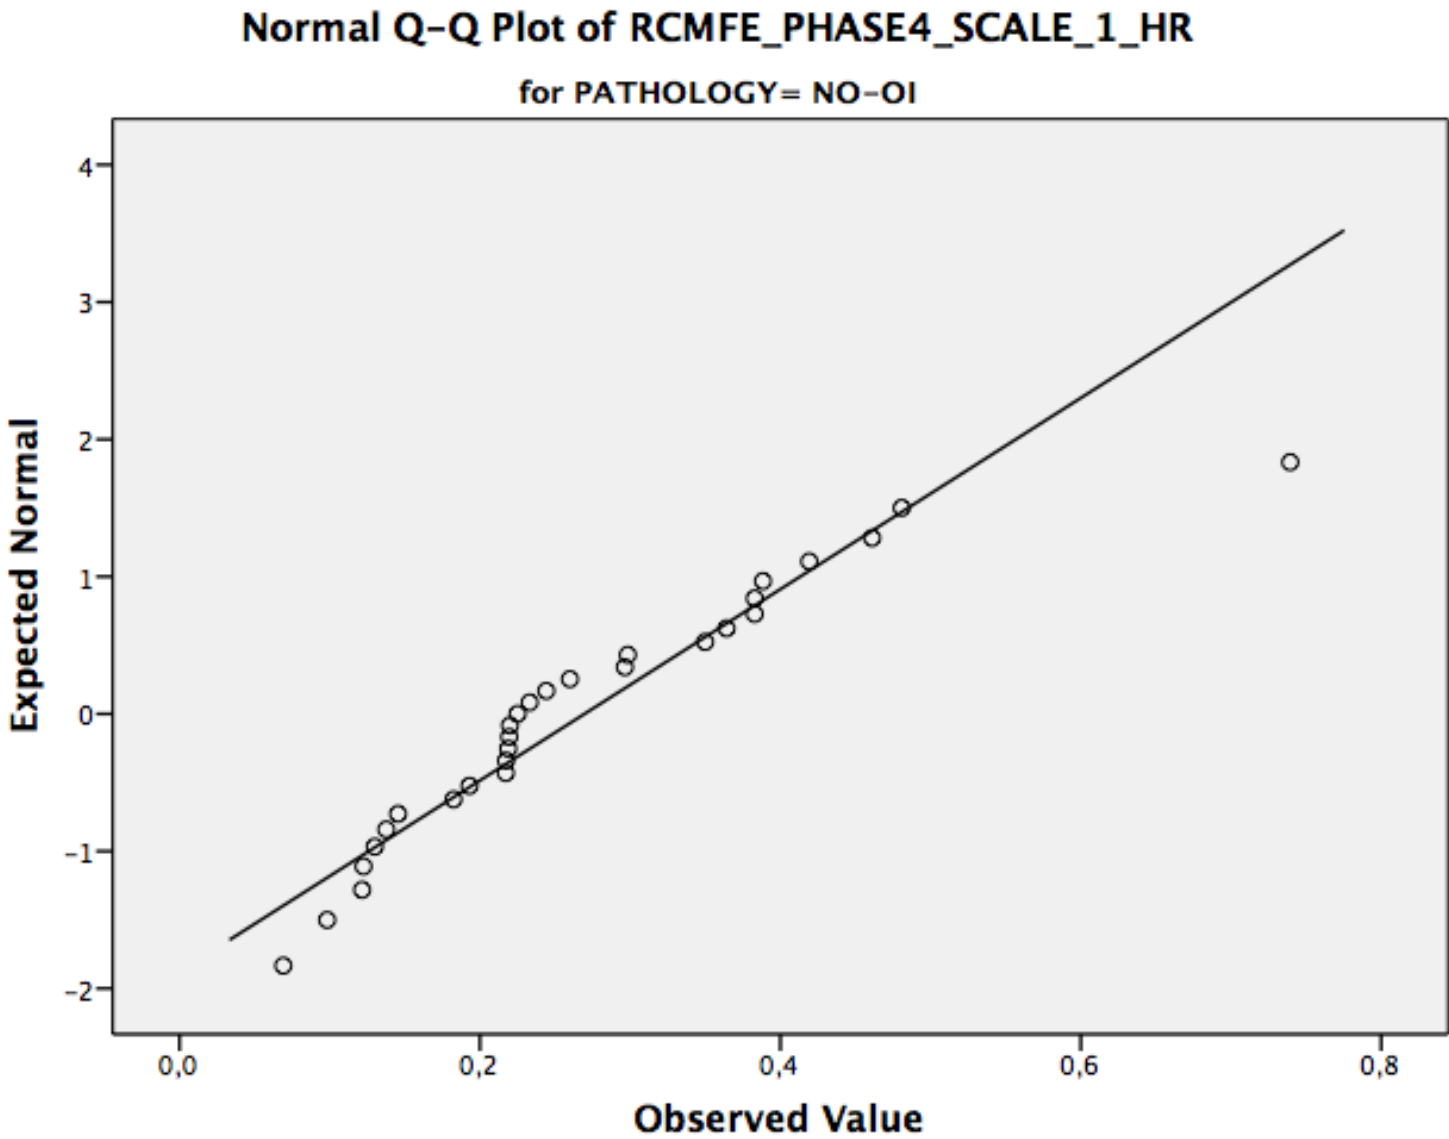

# Normal Q-Q Plot of RCMFE\_PHASE4\_SCALE\_1\_HR

for PATHOLOGY= OI

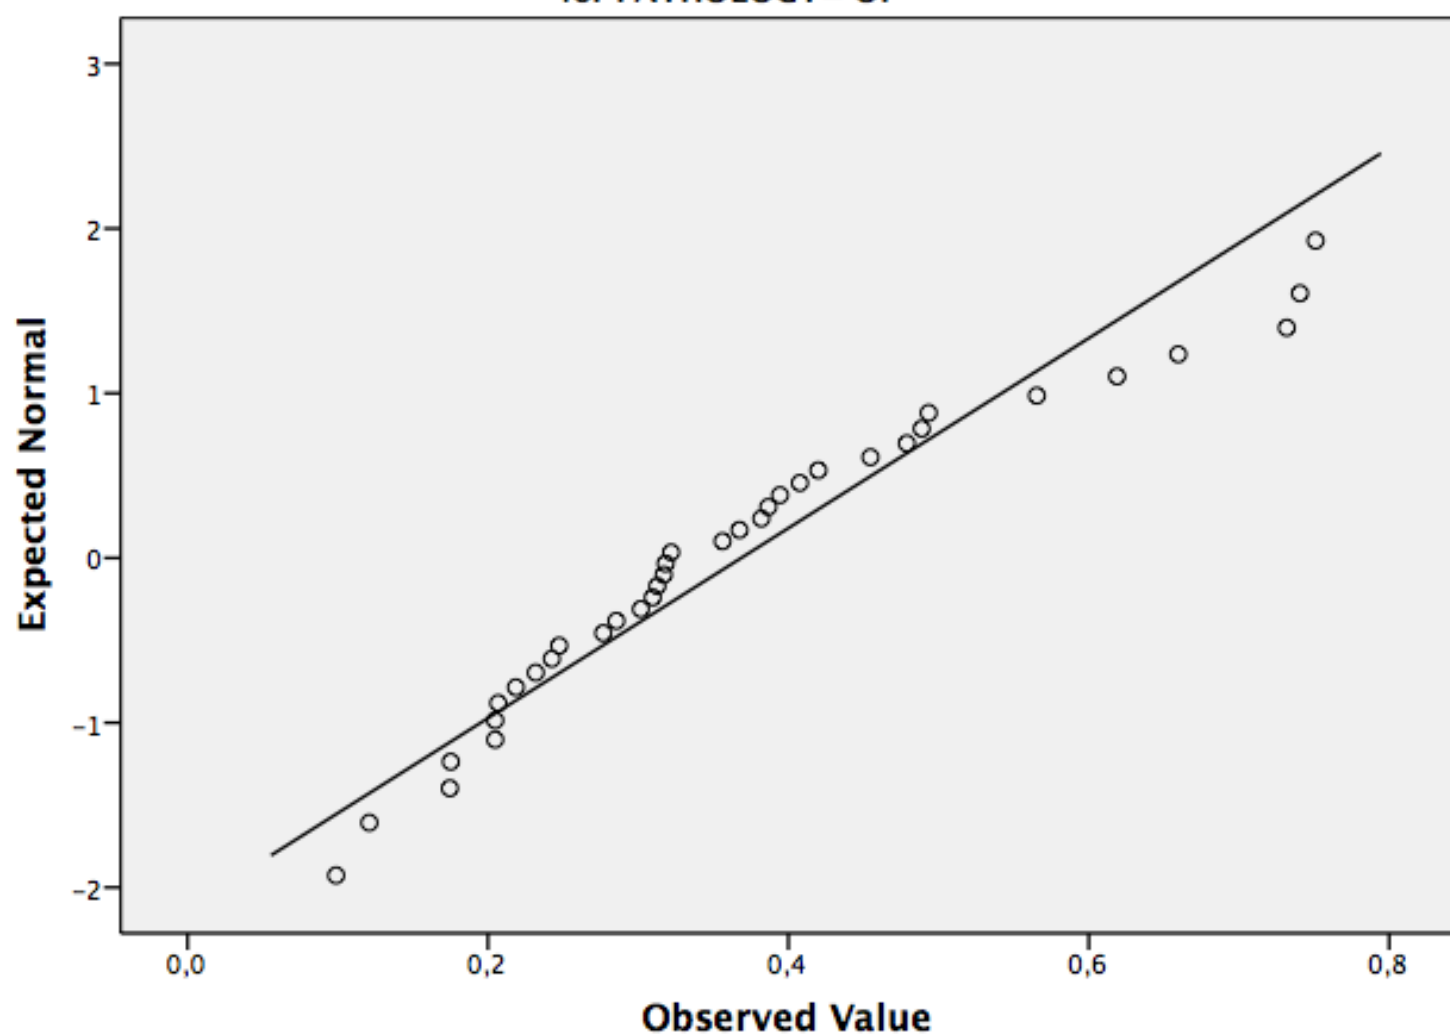

Normal Q-Q Plots

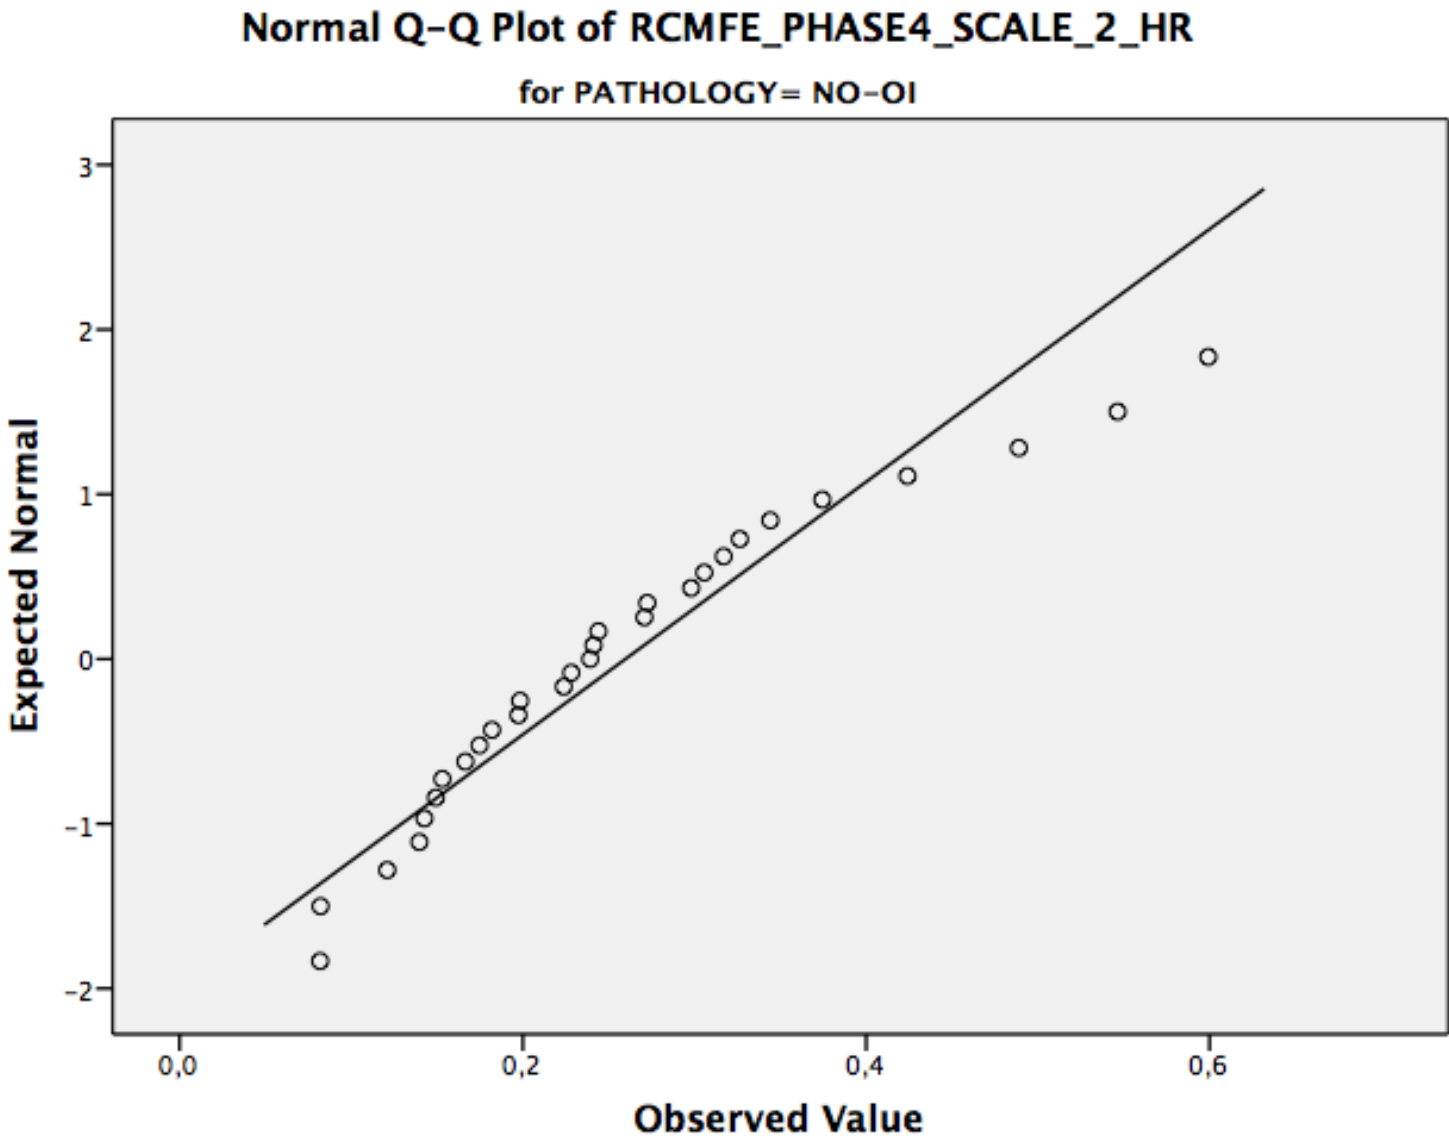

# Normal Q-Q Plot of RCMFE\_PHASE4\_SCALE\_2\_HR

for PATHOLOGY= OI

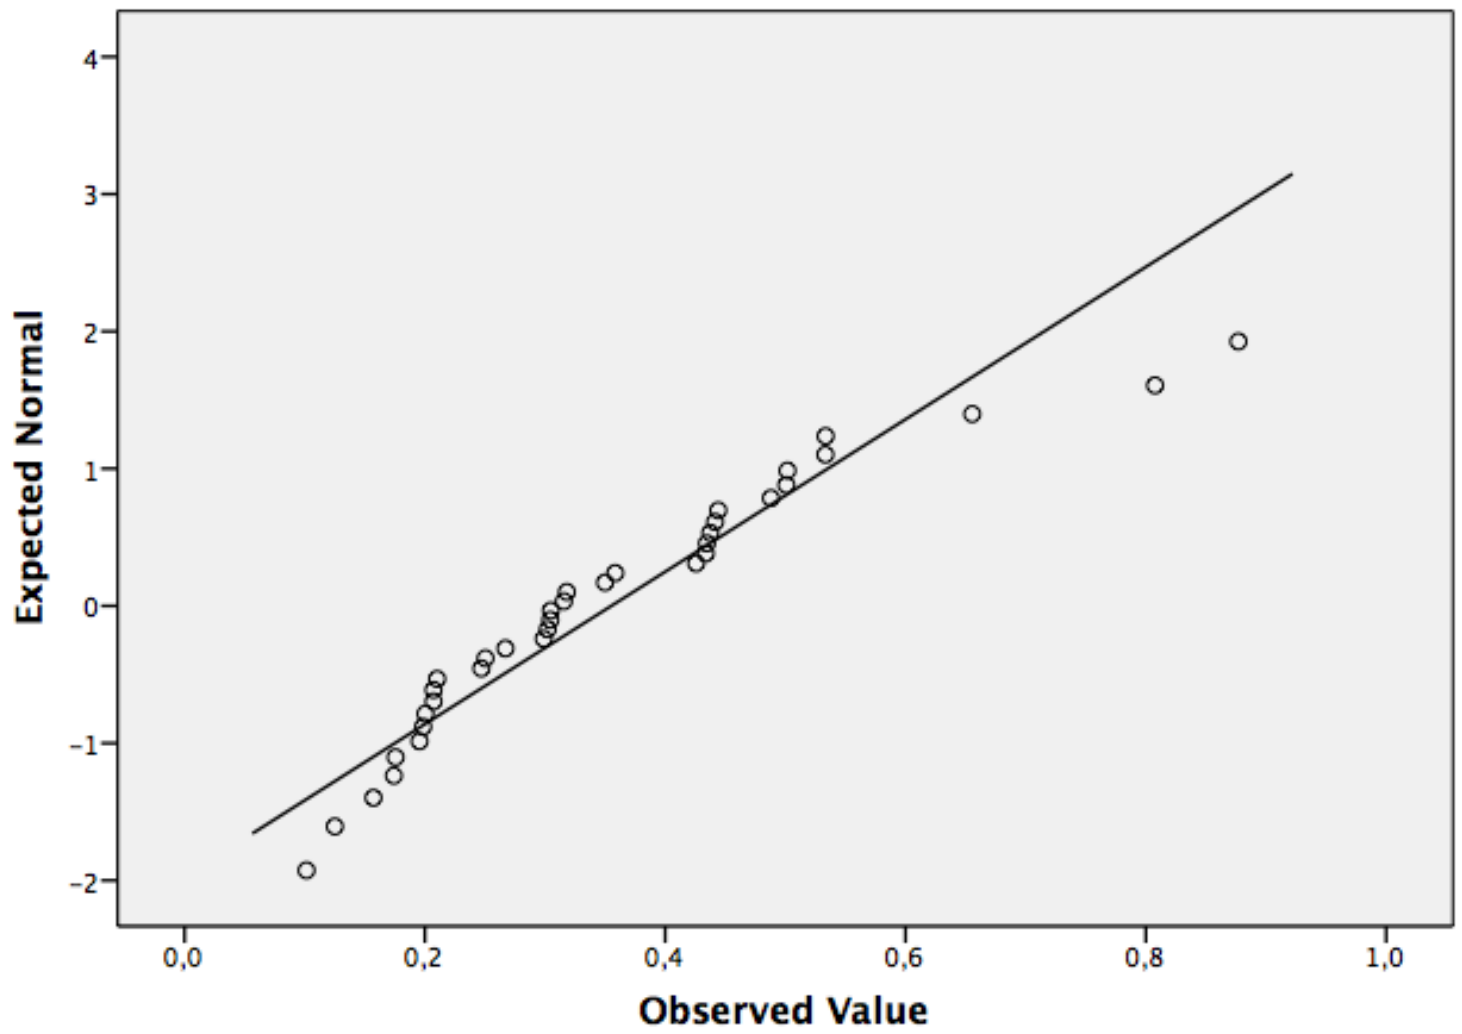

Normal Q-Q Plots

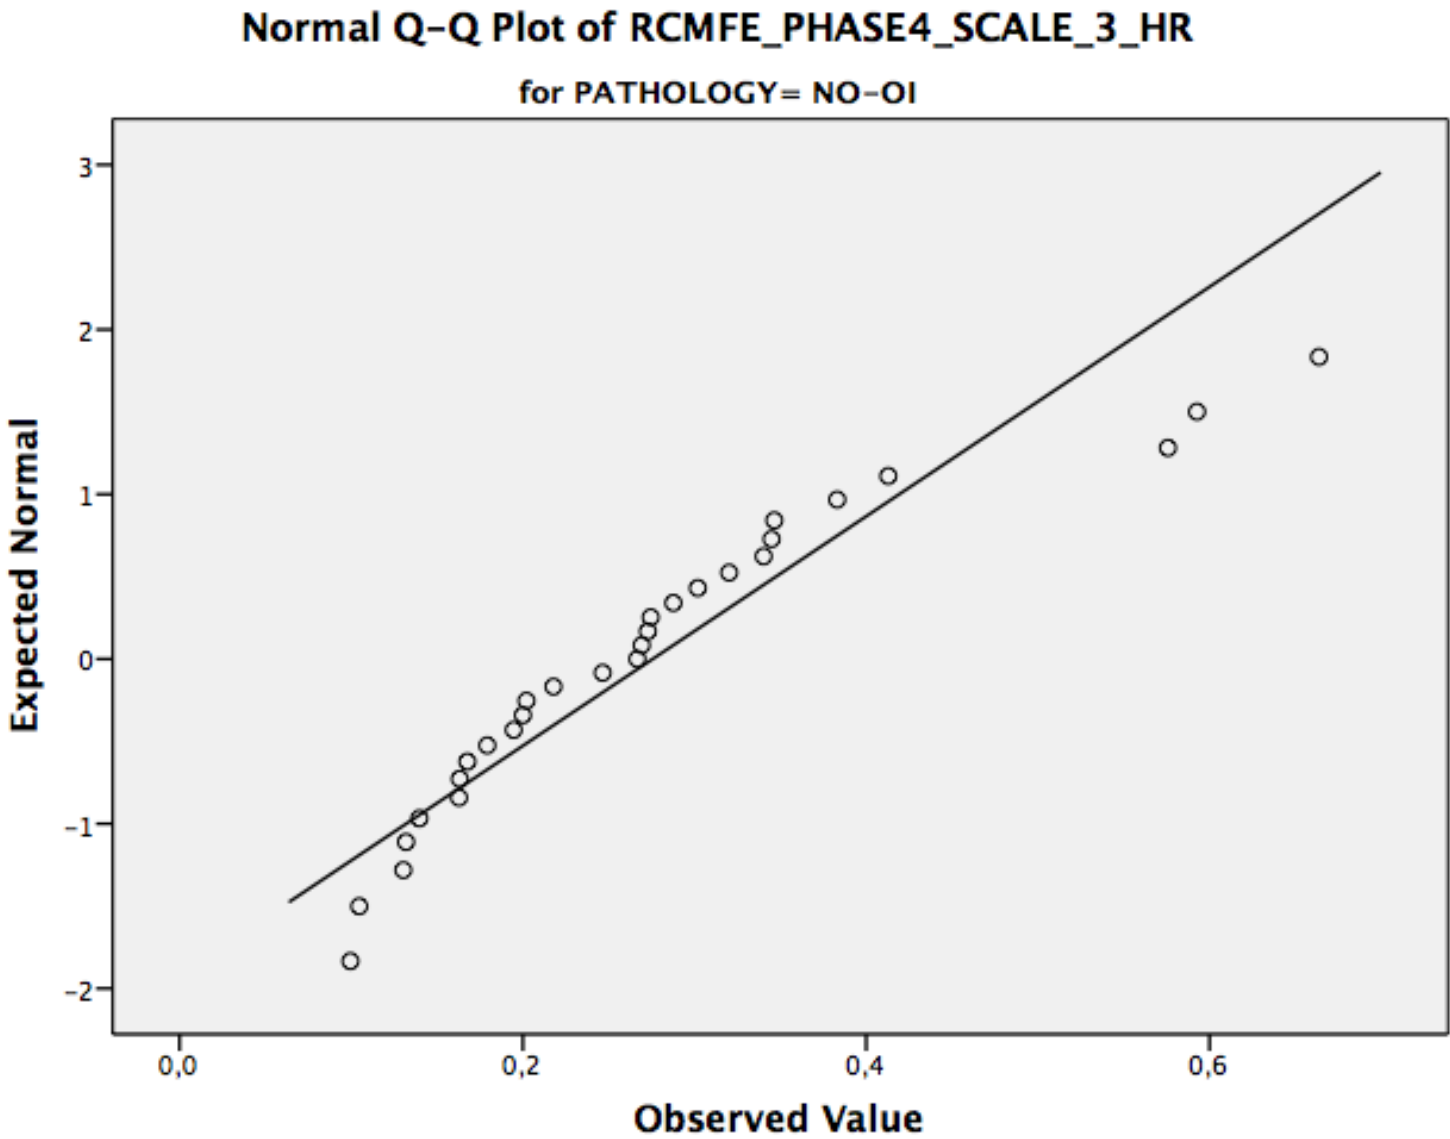

# Normal Q-Q Plot of RCMFE\_PHASE4\_SCALE\_3\_HR

for PATHOLOGY= OI

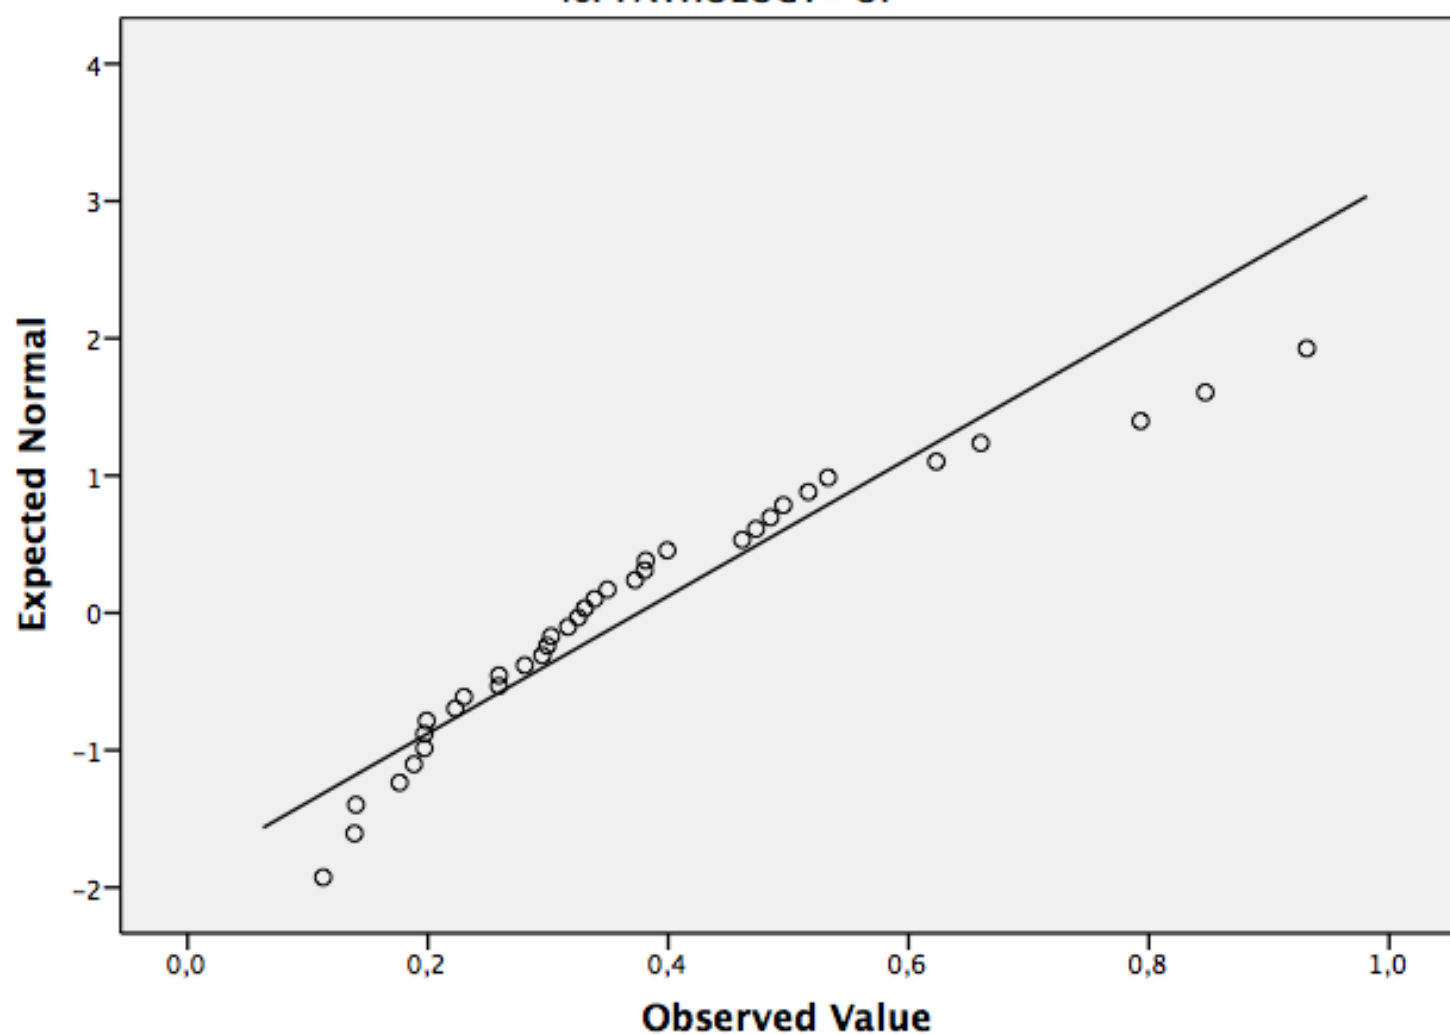

Normal Q-Q Plots

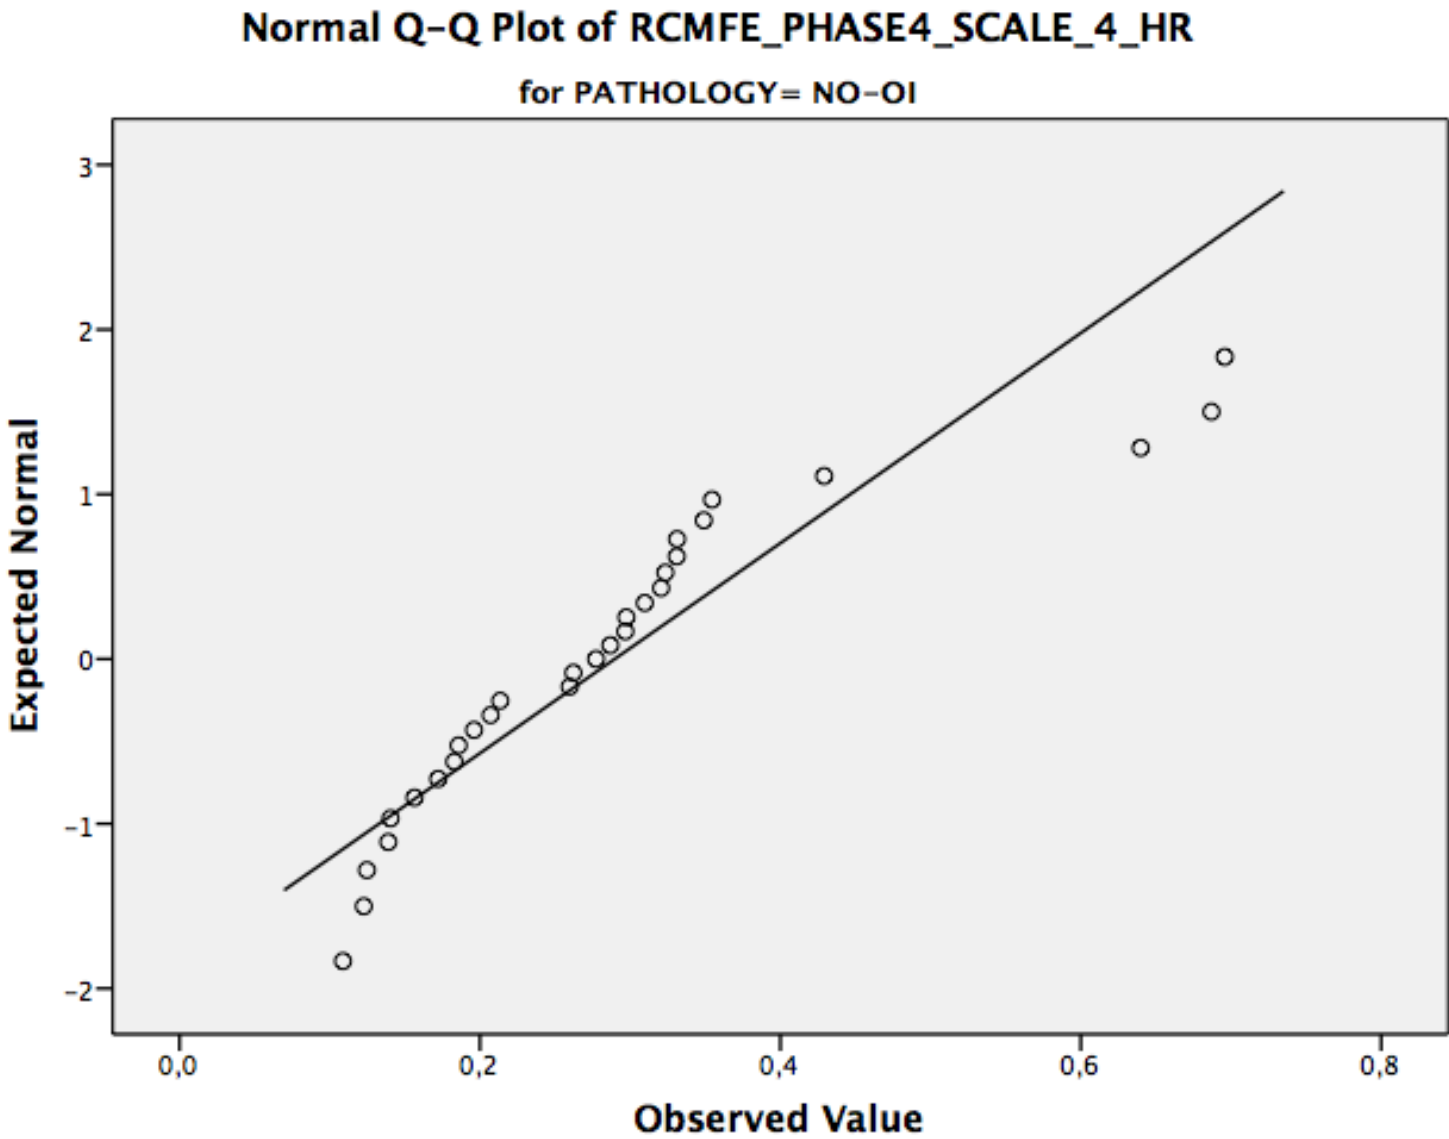

# Normal Q-Q Plot of RCMFE\_PHASE4\_SCALE\_4\_HR

for PATHOLOGY= OI

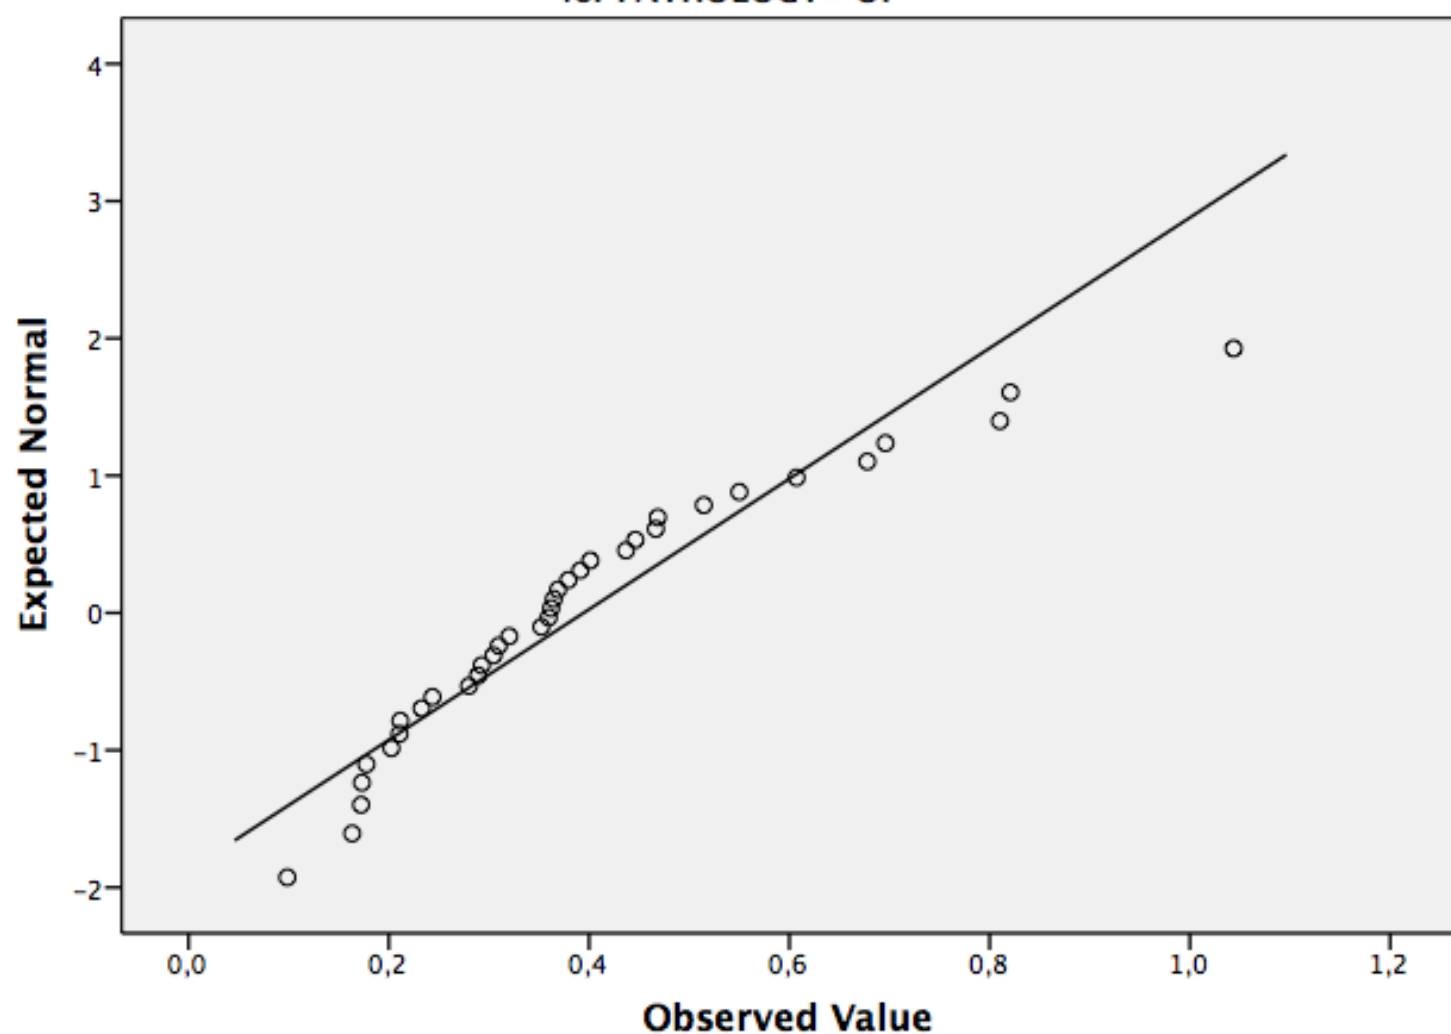



Normal Q-Q Plots

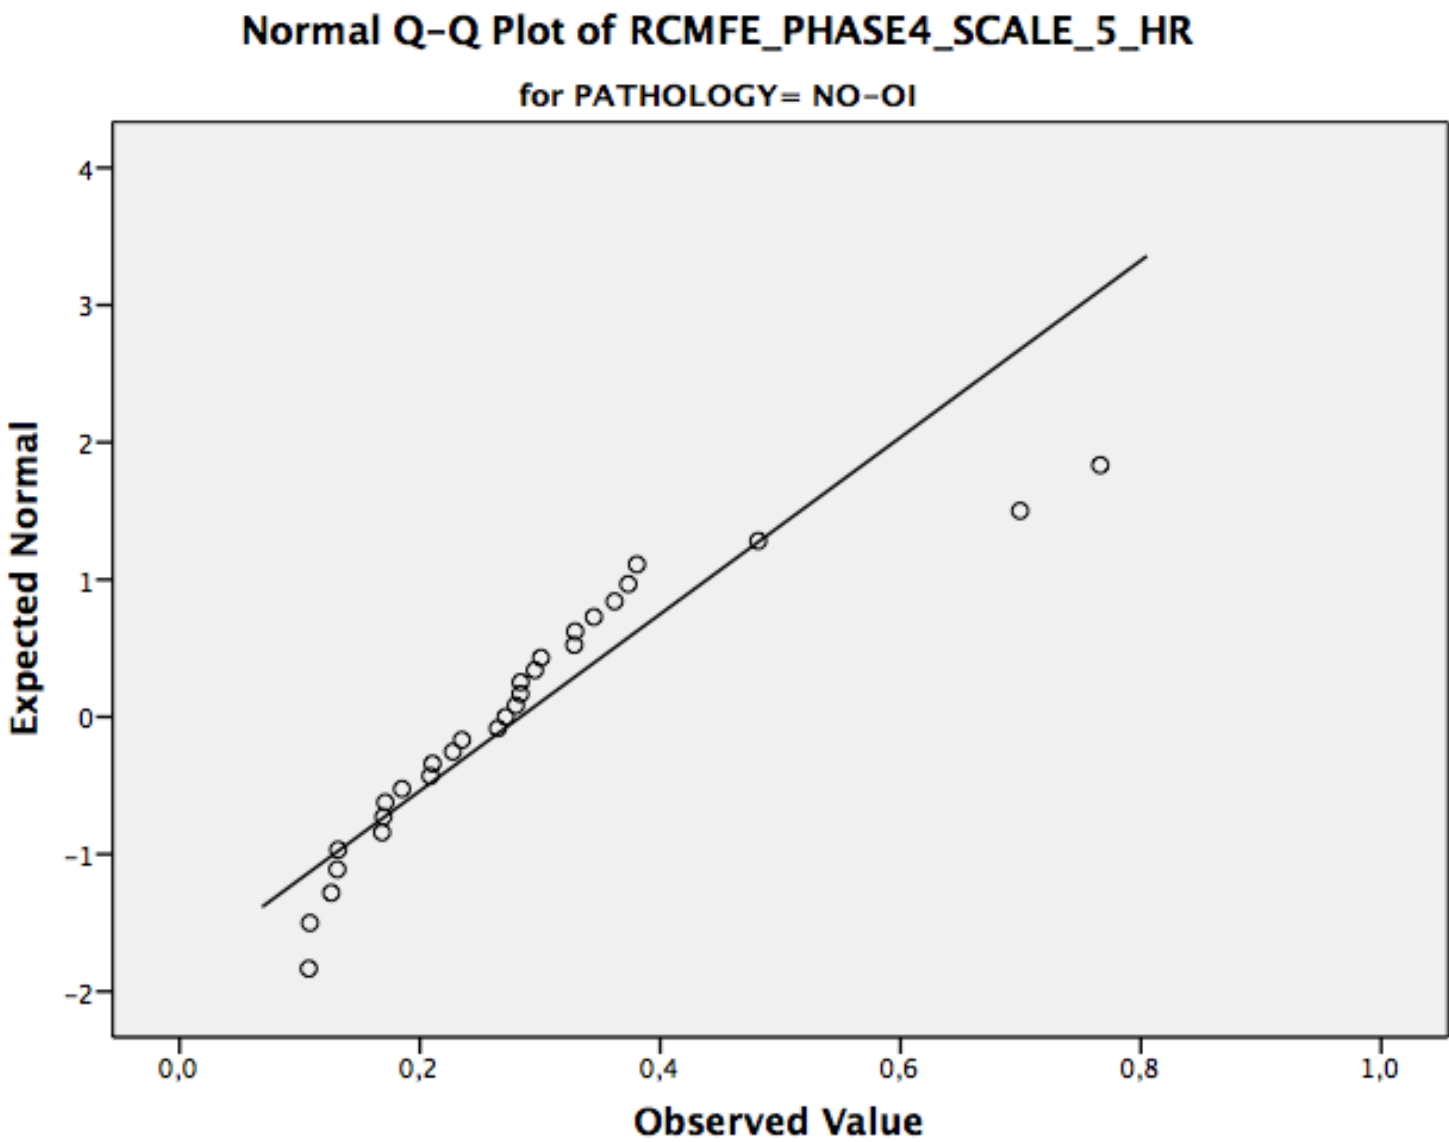

# Normal Q-Q Plot of RCMFE\_PHASE4\_SCALE\_5\_HR

for PATHOLOGY= OI

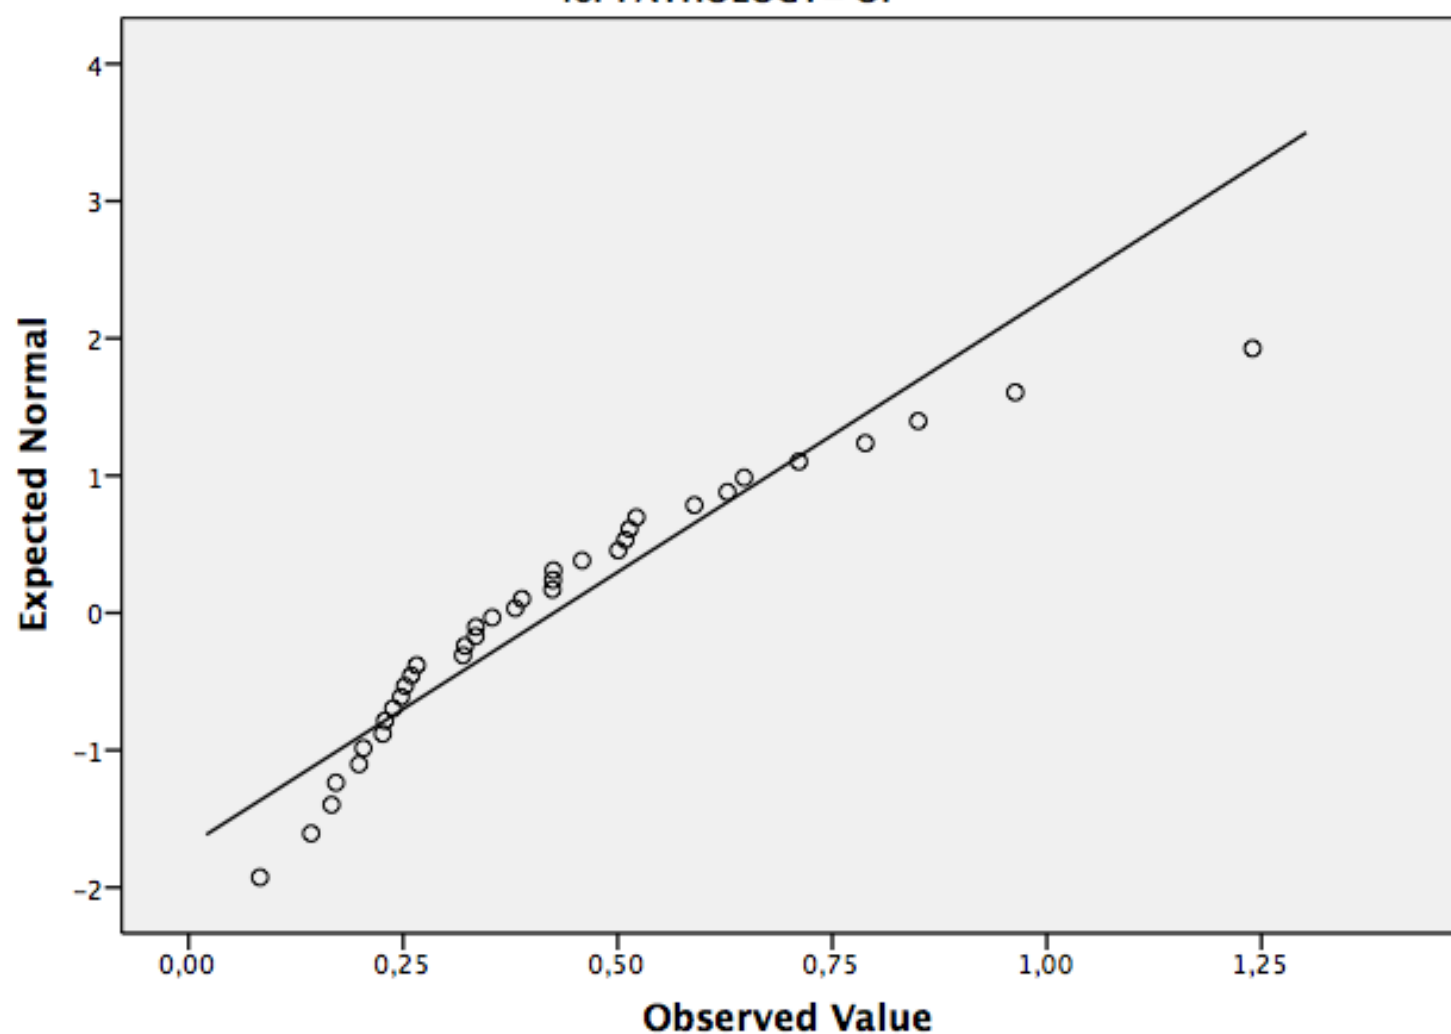

Normal Q-Q Plots

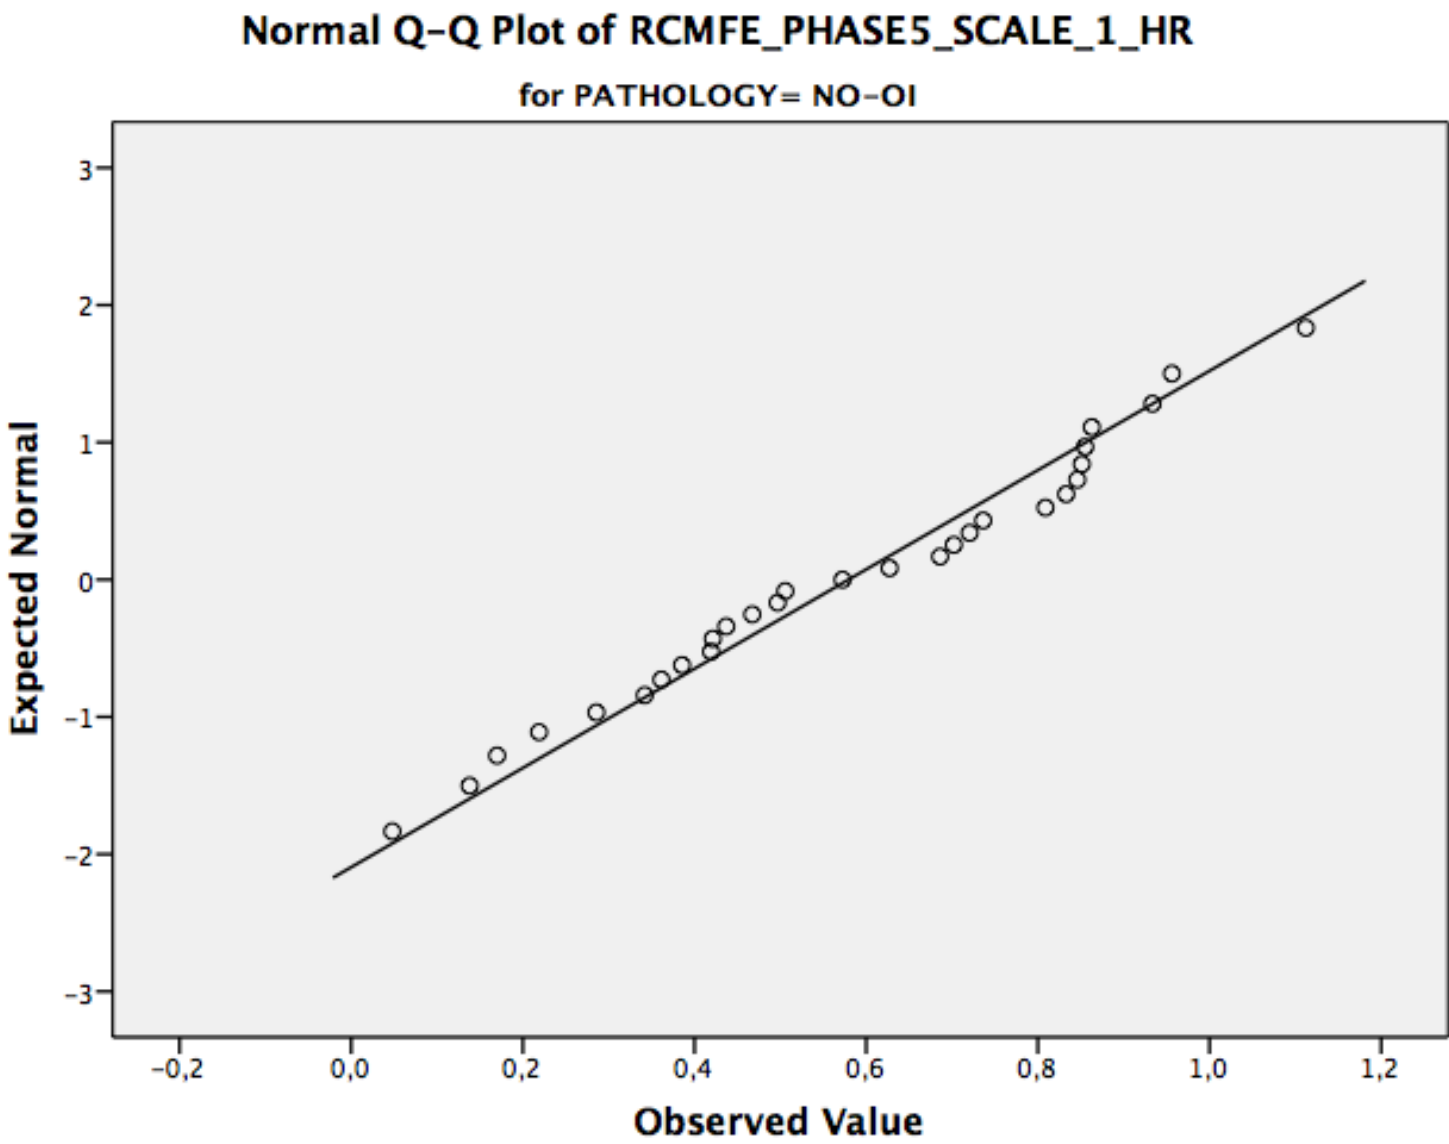

# Normal Q-Q Plot of RCMFE\_PHASE5\_SCALE\_1\_HR

for PATHOLOGY= OI

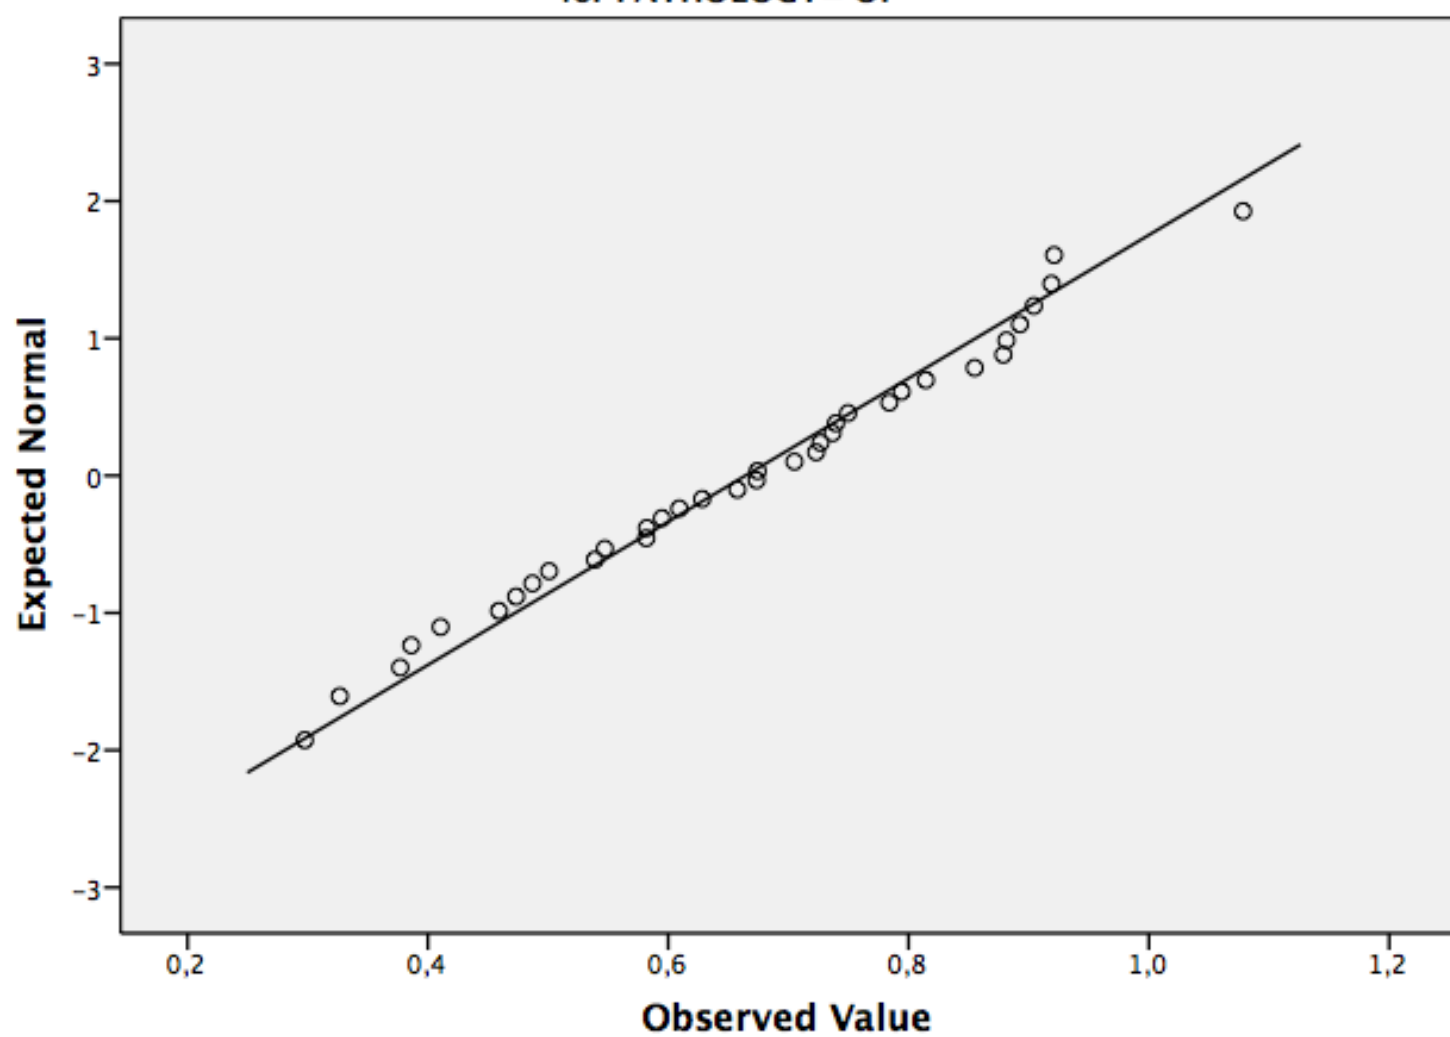

Normal Q-Q Plots

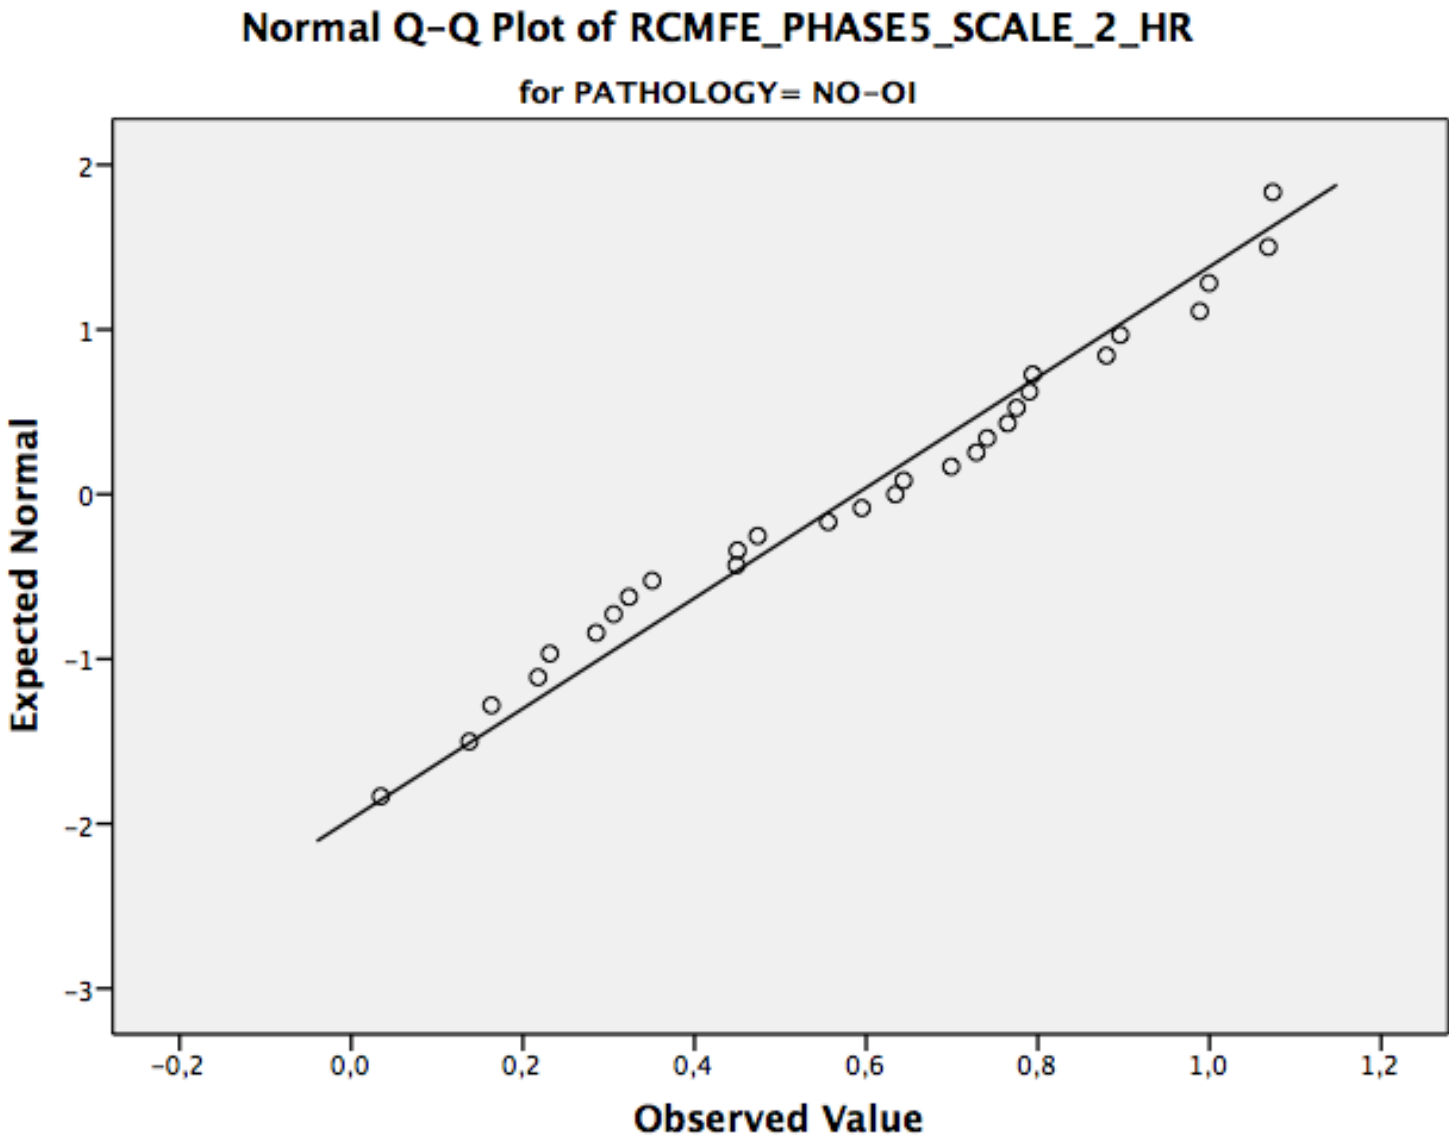

# Normal Q-Q Plot of RCMFE\_PHASE5\_SCALE\_2\_HR

for PATHOLOGY= OI

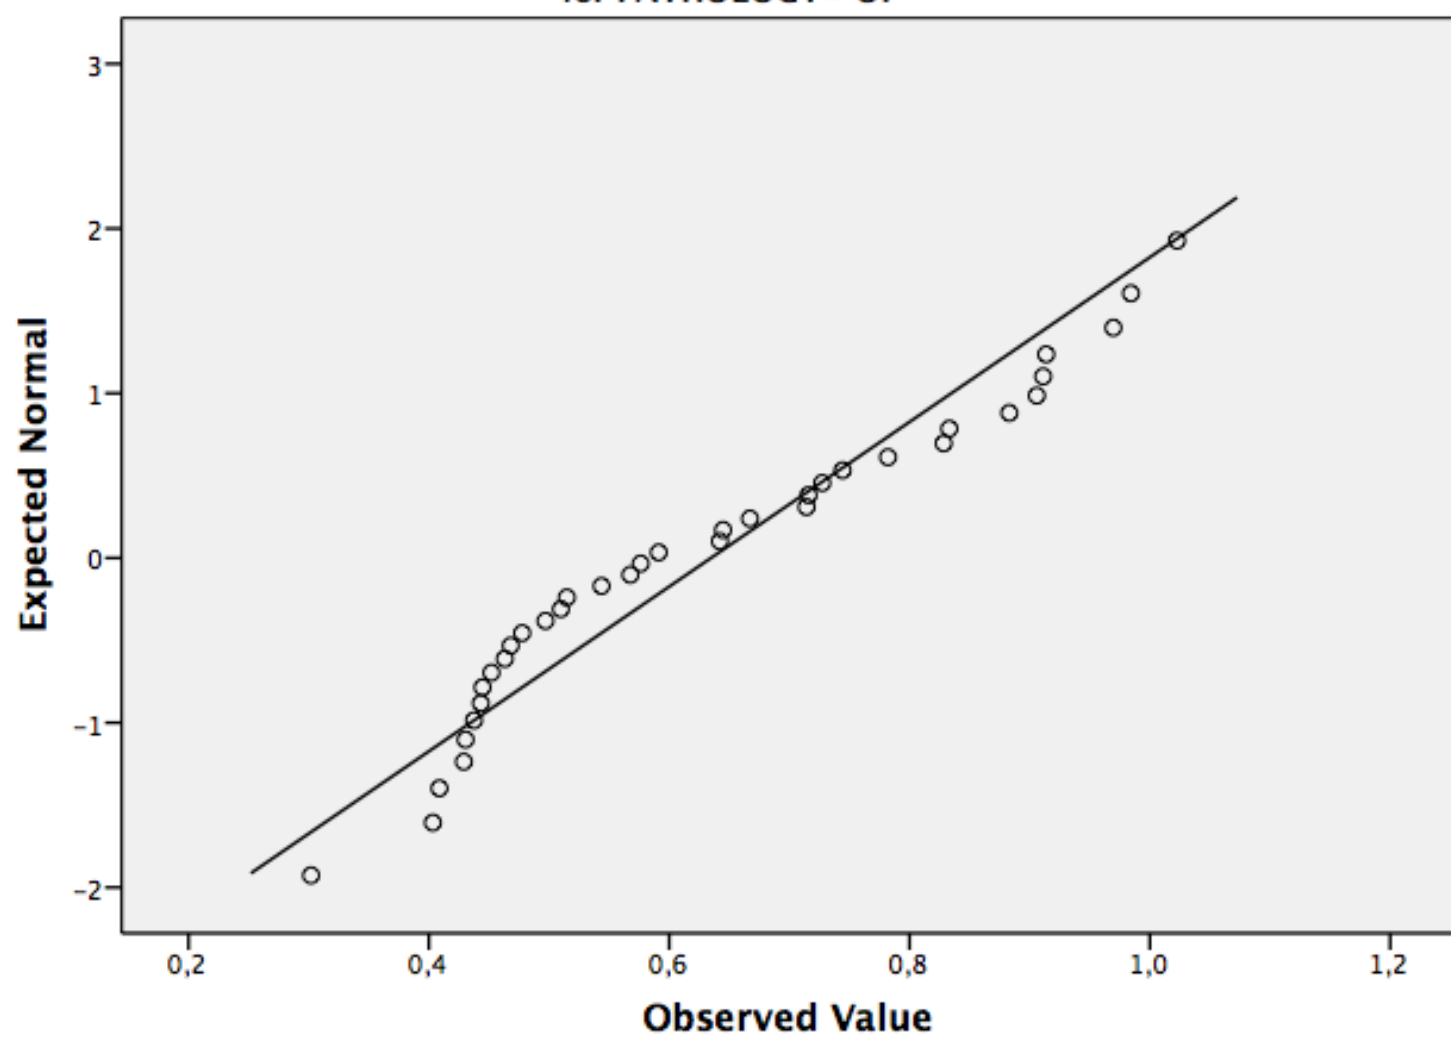

Normal Q-Q Plots

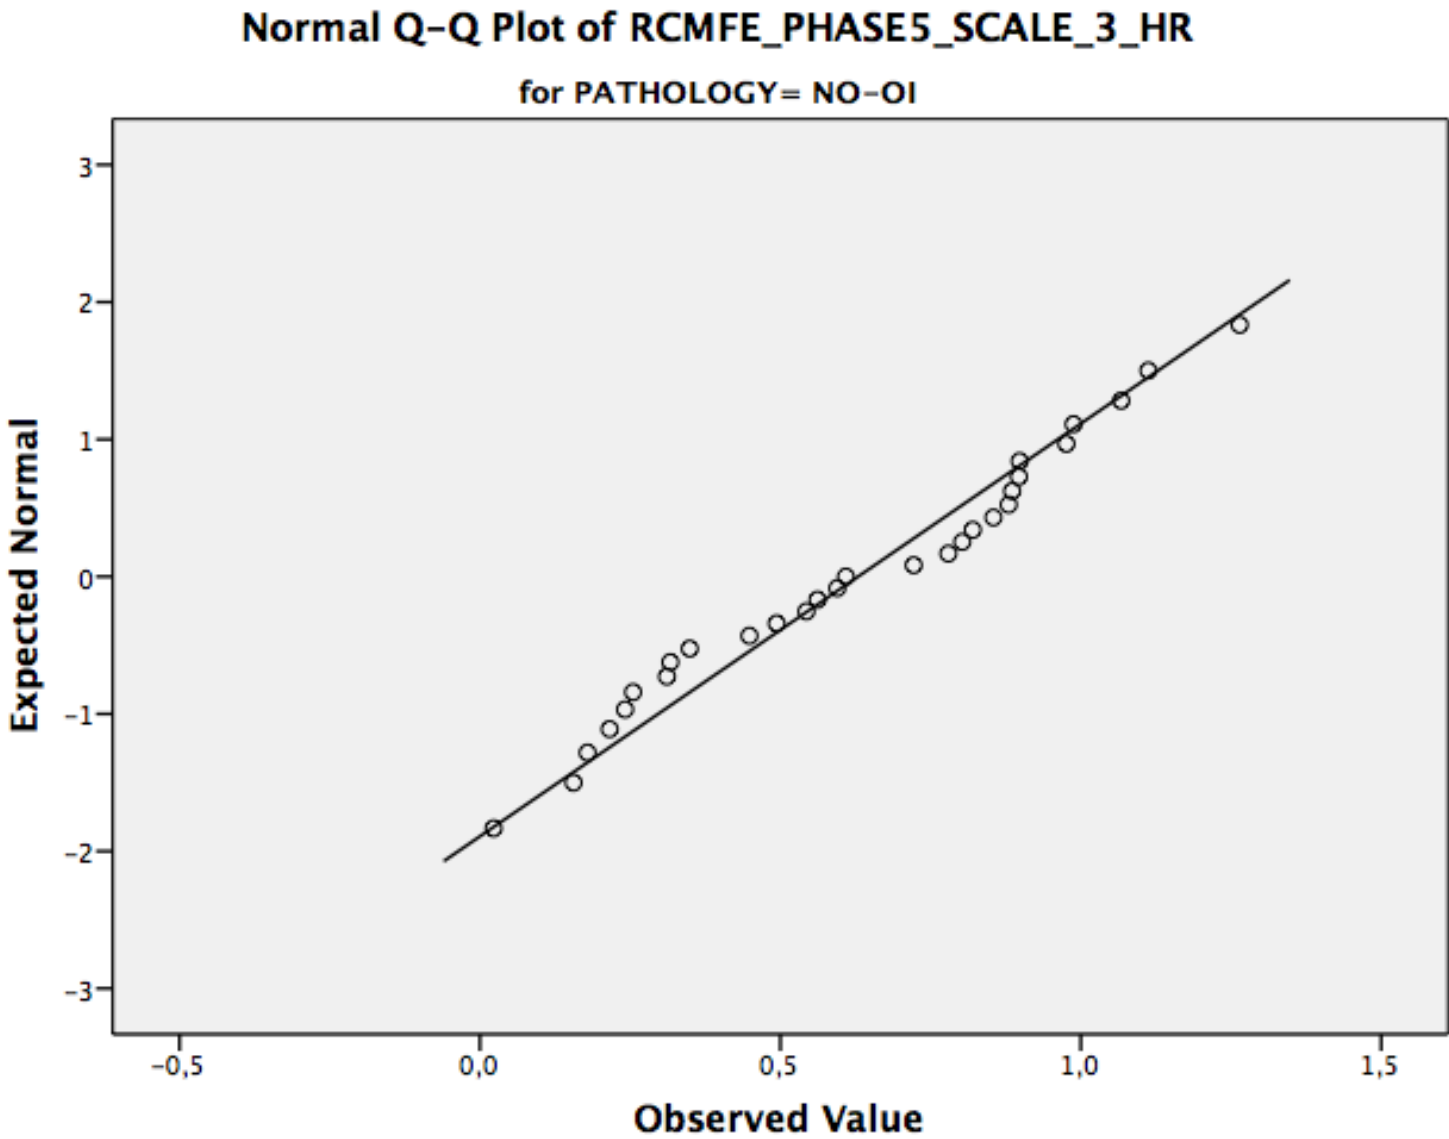

# Normal Q-Q Plot of RCMFE\_PHASE5\_SCALE\_3\_HR

for PATHOLOGY= OI

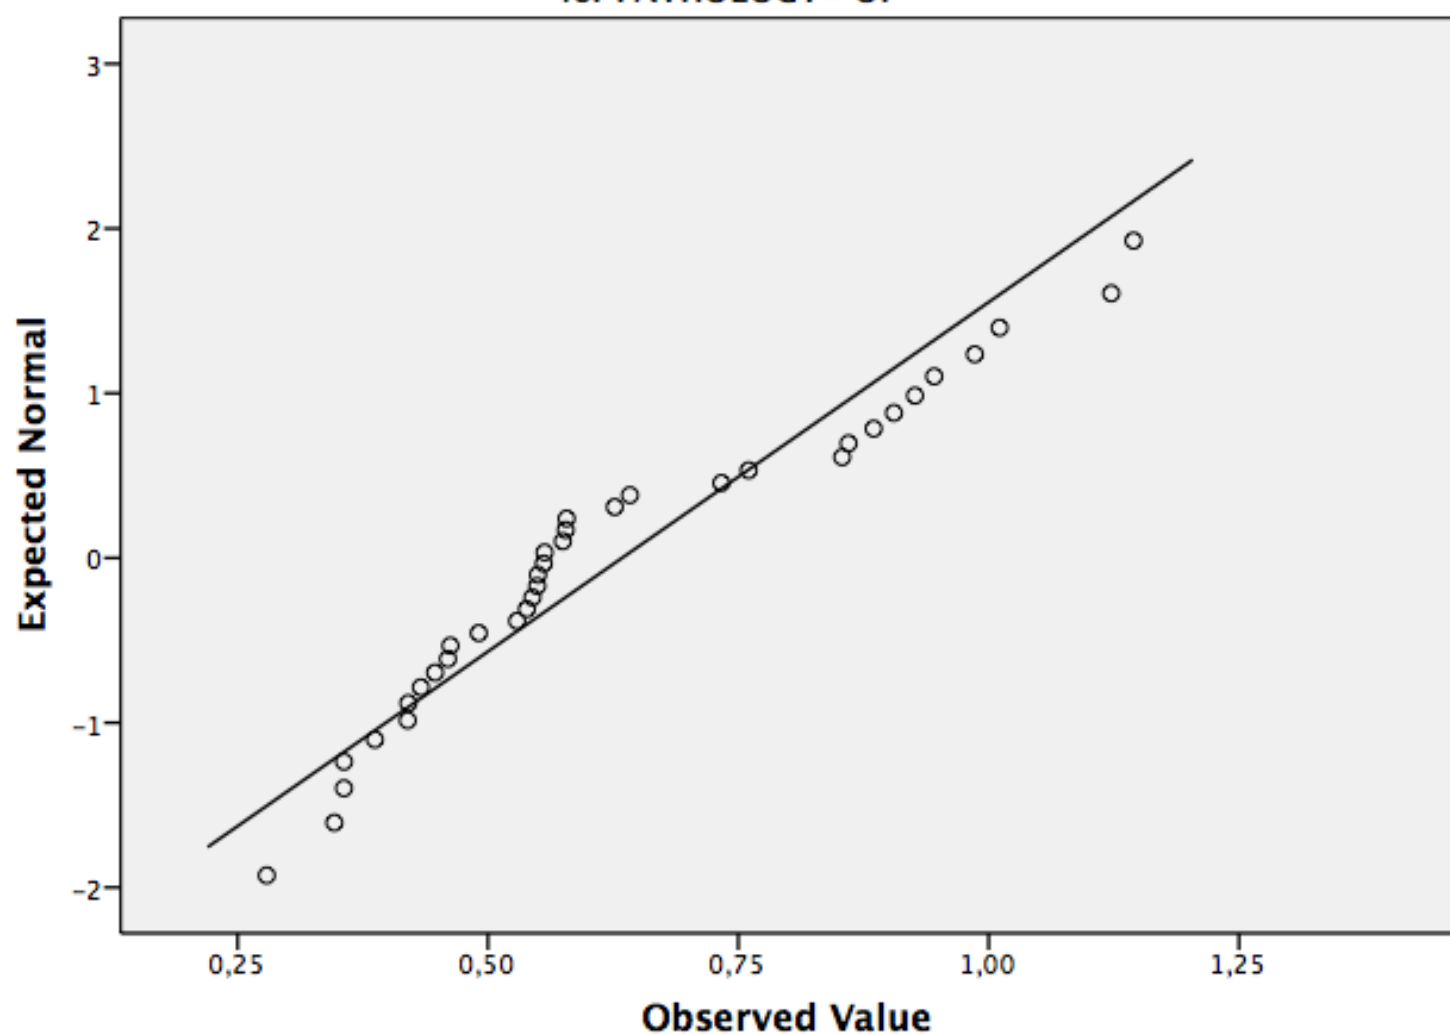



Normal Q-Q Plots

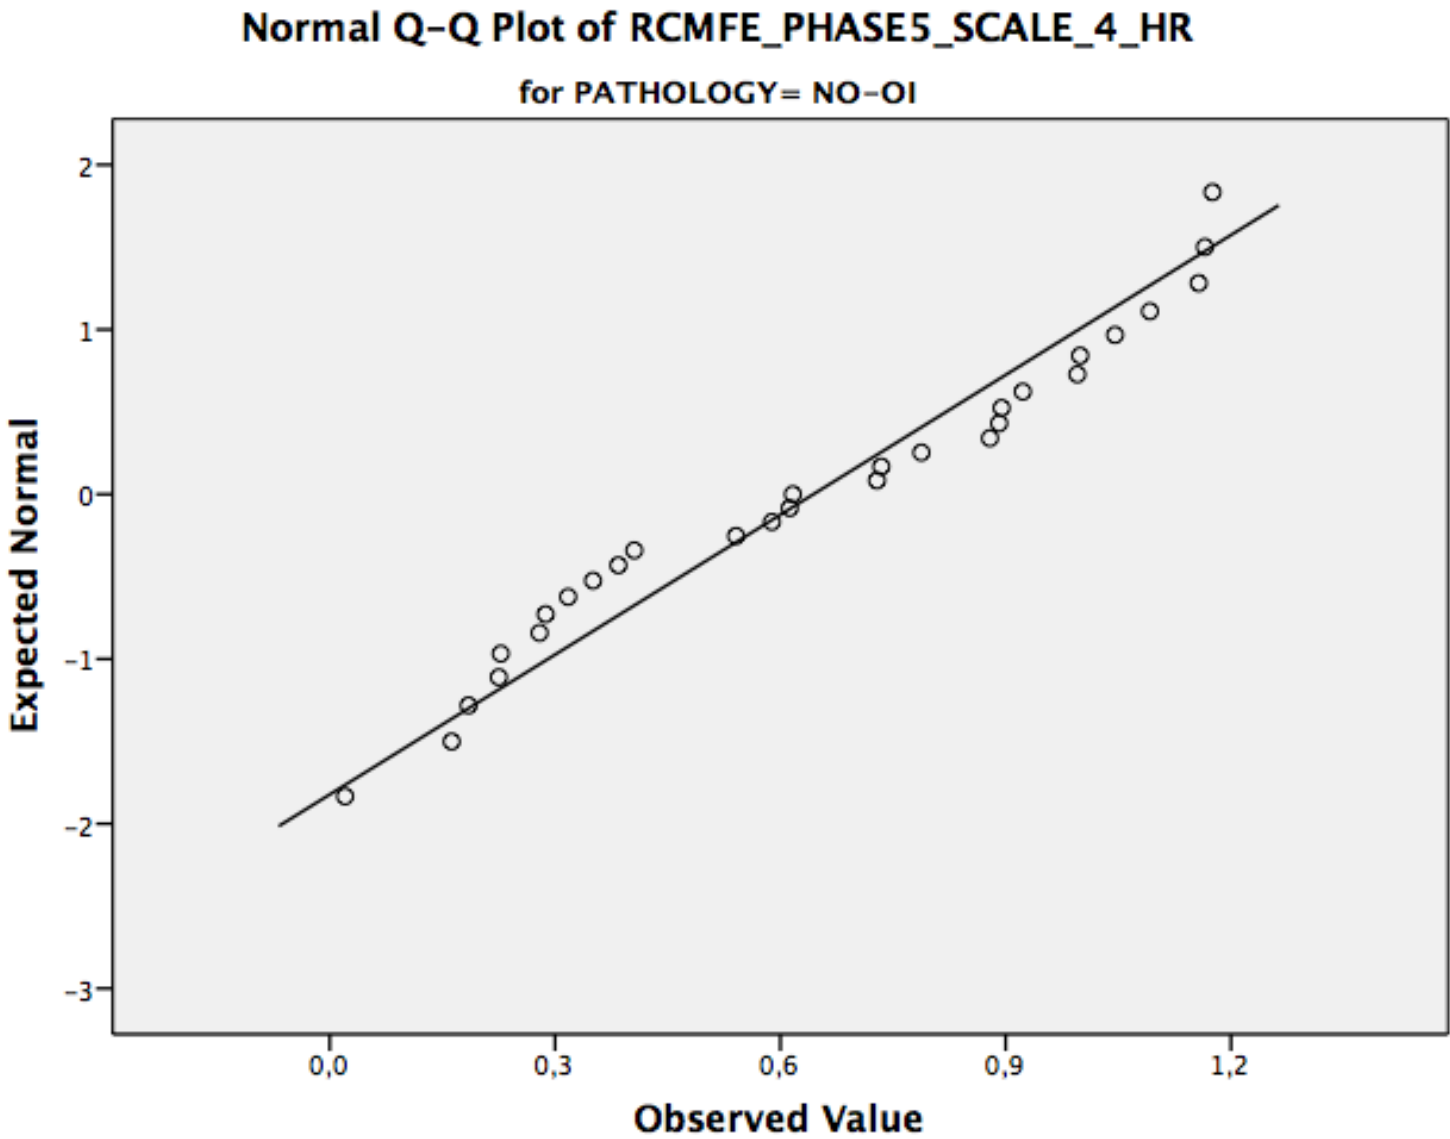

# Normal Q-Q Plot of RCMFE\_PHASE5\_SCALE\_4\_HR

for PATHOLOGY= OI

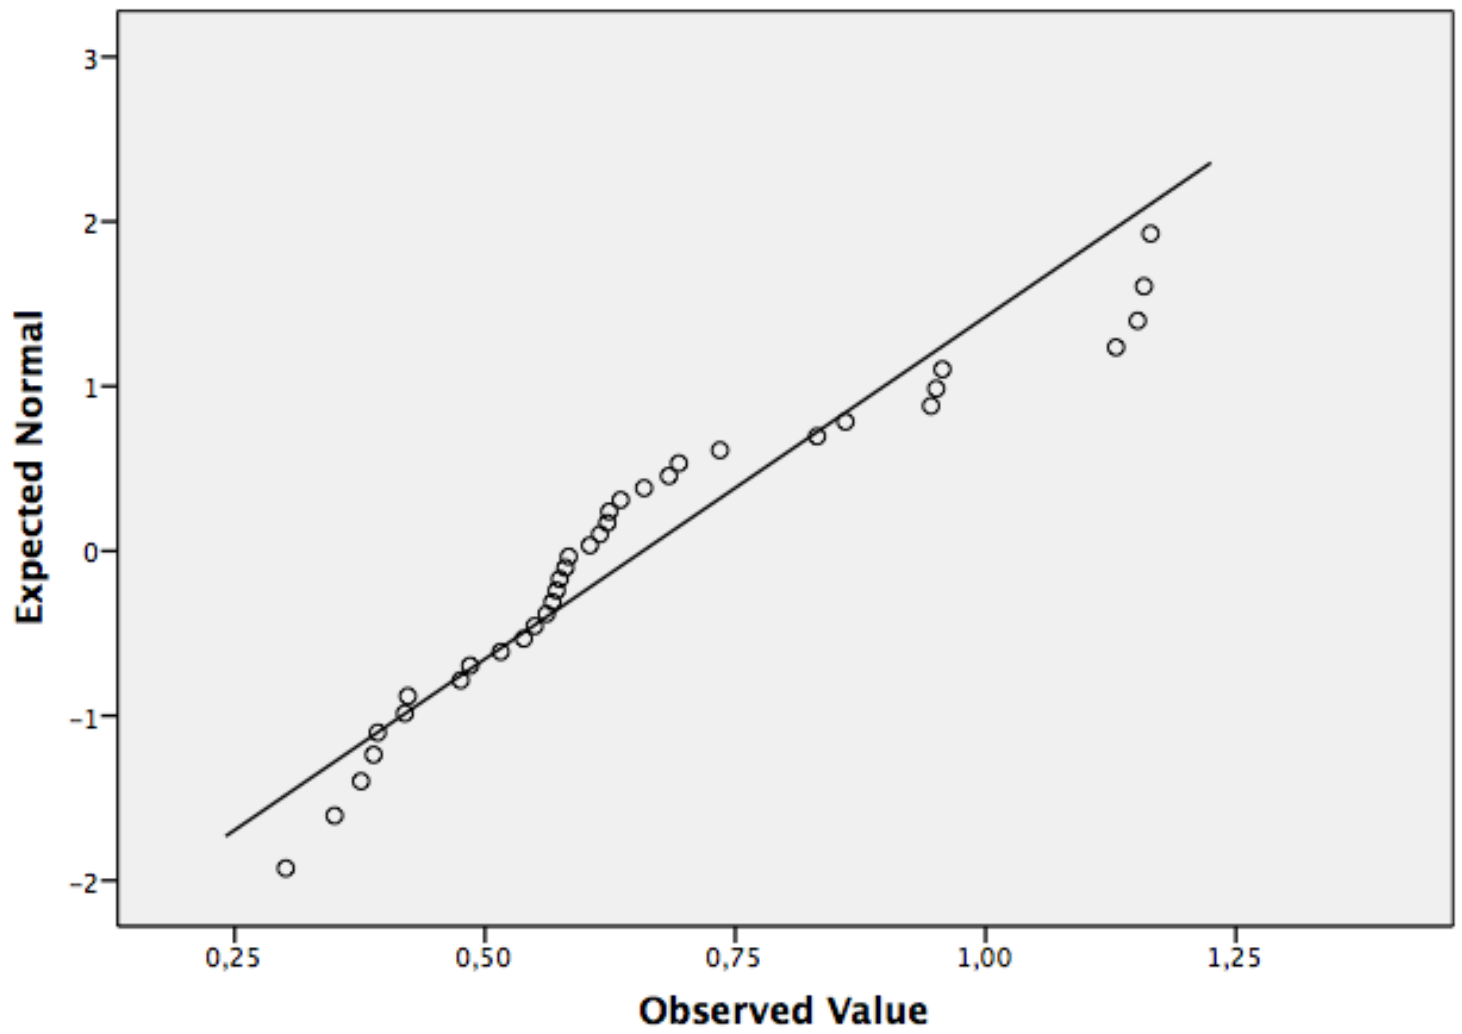

Normal Q-Q Plots

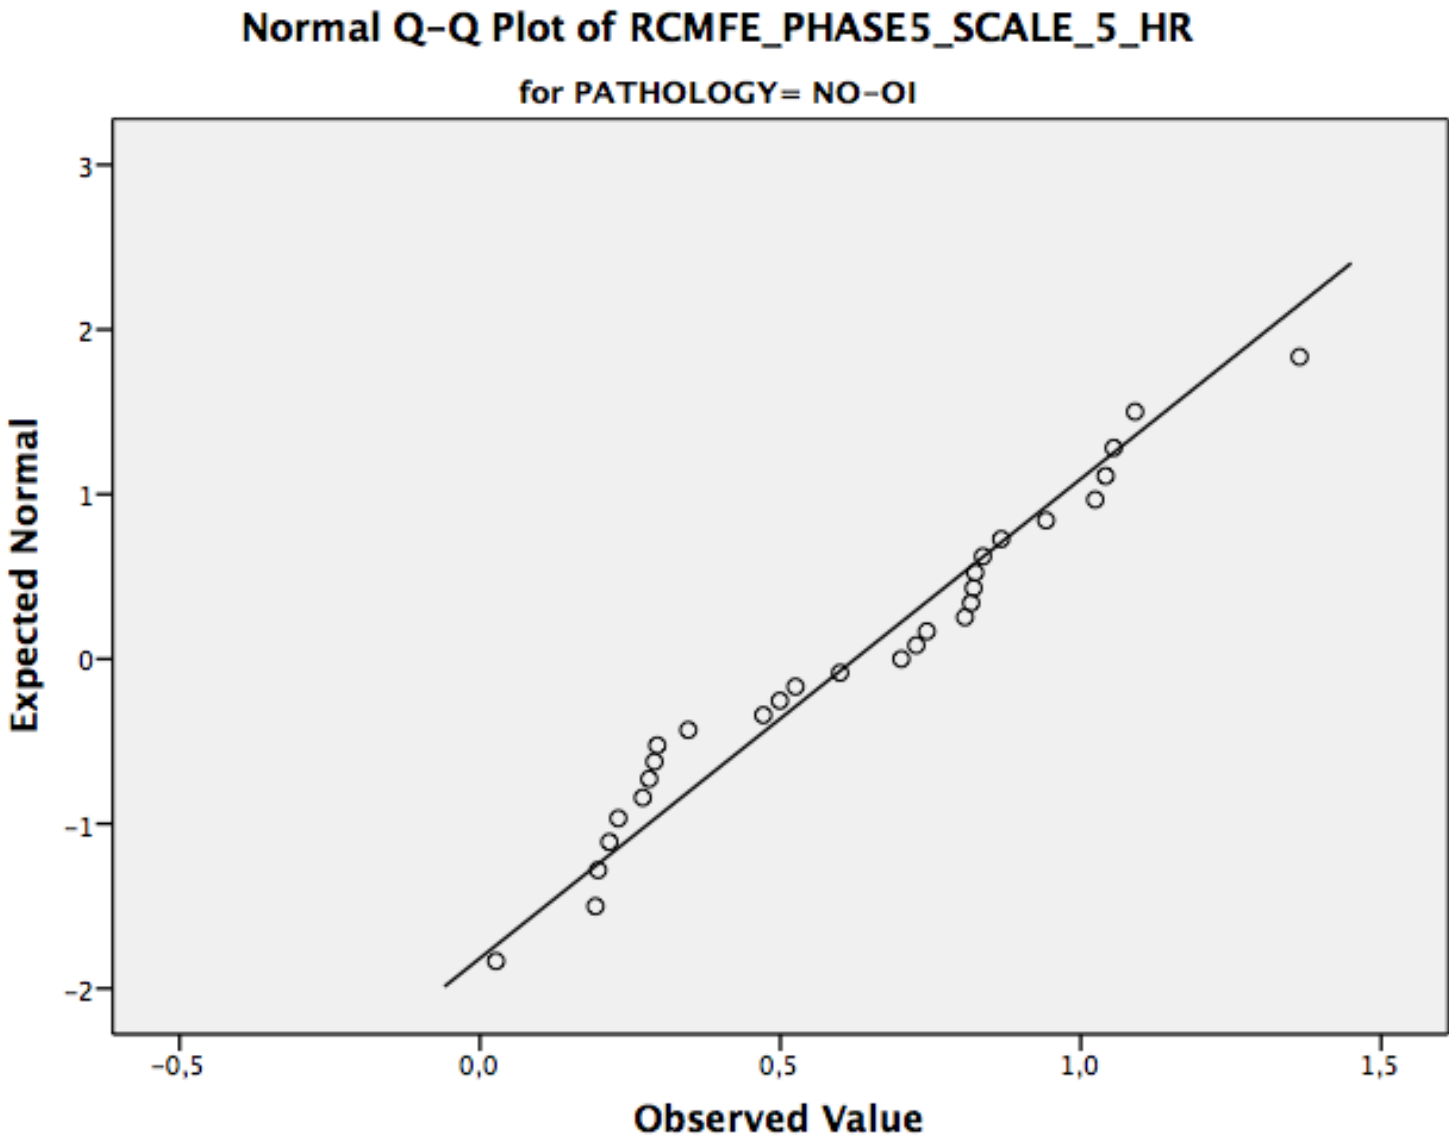

# Normal Q-Q Plot of RCMFE\_PHASE5\_SCALE\_5\_HR

for PATHOLOGY= OI

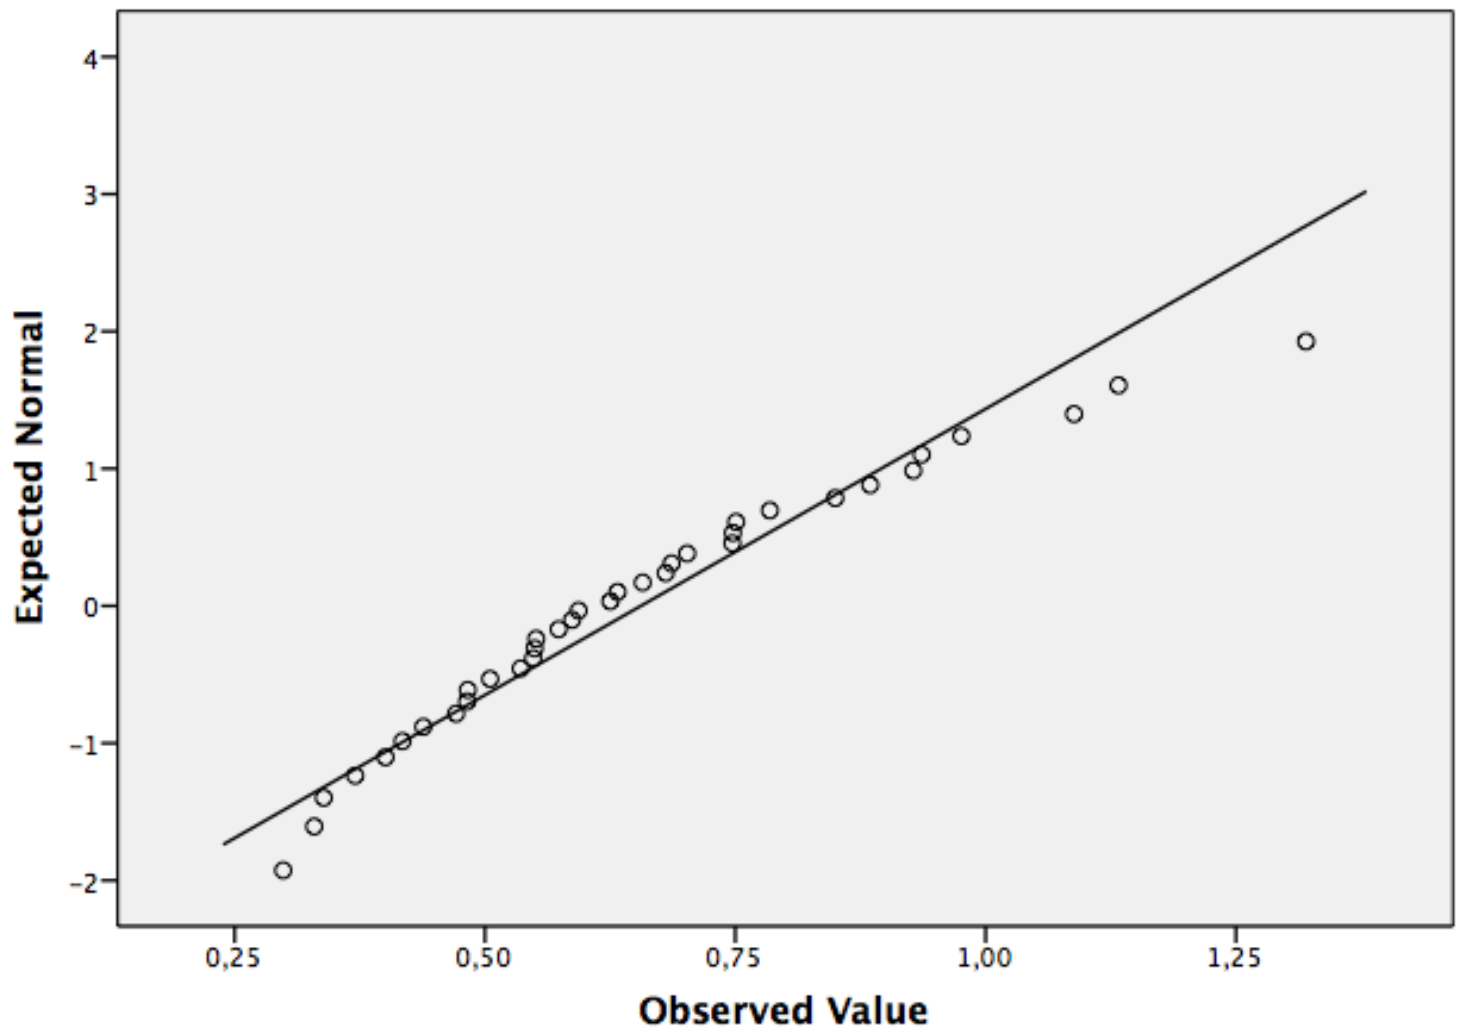

## GENDER

## Case Processing Summary

| GENDER                      | Cases |         |         |         |       |         |
|-----------------------------|-------|---------|---------|---------|-------|---------|
|                             | Valid |         | Missing |         | Total |         |
|                             | N     | Percent | N       | Percent | N     | Percent |
| RCMFE_PHASE1_SCALE_1_ WOMEN | 42    | 100,0%  | 0       | 0,0%    | 42    | 100,0%  |
| CO MEN                      | 23    | 100,0%  | 0       | 0,0%    | 23    | 100,0%  |
| RCMFE_PHASE1_SCALE_2_ WOMEN | 42    | 100,0%  | 0       | 0,0%    | 42    | 100,0%  |
| CO MEN                      | 23    | 100,0%  | 0       | 0,0%    | 23    | 100,0%  |
| RCMFE_PHASE1_SCALE_3_ WOMEN | 42    | 100,0%  | 0       | 0,0%    | 42    | 100,0%  |
| CO MEN                      | 23    | 100,0%  | 0       | 0,0%    | 23    | 100,0%  |
| RCMFE_PHASE1_SCALE_4_ WOMEN | 42    | 100,0%  | 0       | 0,0%    | 42    | 100,0%  |
| CO MEN                      | 23    | 100,0%  | 0       | 0,0%    | 23    | 100,0%  |
| RCMFE_PHASE1_SCALE_5_ WOMEN | 42    | 100,0%  | 0       | 0,0%    | 42    | 100,0%  |
| CO MEN                      | 23    | 100,0%  | 0       | 0,0%    | 23    | 100,0%  |
| RCMFE_PHASE2_SCALE_1_ WOMEN | 42    | 100,0%  | 0       | 0,0%    | 42    | 100,0%  |
| CO MEN                      | 23    | 100,0%  | 0       | 0,0%    | 23    | 100,0%  |
| RCMFE_PHASE2_SCALE_2_ WOMEN | 42    | 100,0%  | 0       | 0,0%    | 42    | 100,0%  |
| CO MEN                      | 23    | 100,0%  | 0       | 0,0%    | 23    | 100,0%  |
| RCMFE_PHASE2_SCALE_3_ WOMEN | 42    | 100,0%  | 0       | 0,0%    | 42    | 100,0%  |
| CO MEN                      | 23    | 100,0%  | 0       | 0,0%    | 23    | 100,0%  |
| RCMFE_PHASE2_SCALE_4_ WOMEN | 42    | 100,0%  | 0       | 0,0%    | 42    | 100,0%  |
| CO MEN                      | 23    | 100,0%  | 0       | 0,0%    | 23    | 100,0%  |
| RCMFE_PHASE2_SCALE_5_ WOMEN | 42    | 100,0%  | 0       | 0,0%    | 42    | 100,0%  |
| CO MEN                      | 23    | 100,0%  | 0       | 0,0%    | 23    | 100,0%  |
| RCMFE_PHASE3_SCALE_1_ WOMEN | 42    | 100,0%  | 0       | 0,0%    | 42    | 100,0%  |
| CO MEN                      | 23    | 100,0%  | 0       | 0,0%    | 23    | 100,0%  |
| RCMFE_PHASE3_SCALE_2_ WOMEN | 42    | 100,0%  | 0       | 0,0%    | 42    | 100,0%  |
| CO MEN                      | 23    | 100,0%  | 0       | 0,0%    | 23    | 100,0%  |
| RCMFE_PHASE3_SCALE_3_ WOMEN | 42    | 100,0%  | 0       | 0,0%    | 42    | 100,0%  |
| CO MEN                      | 23    | 100,0%  | 0       | 0,0%    | 23    | 100,0%  |
| RCMFE_PHASE3_SCALE_4_ WOMEN | 42    | 100,0%  | 0       | 0,0%    | 42    | 100,0%  |
| CO MEN                      | 23    | 100,0%  | 0       | 0,0%    | 23    | 100,0%  |
| RCMFE_PHASE3_SCALE_5_ WOMEN | 42    | 100,0%  | 0       | 0,0%    | 42    | 100,0%  |
| CO MEN                      | 23    | 100,0%  | 0       | 0,0%    | 23    | 100,0%  |
| RCMFE_PHASE4_SCALE_1_ WOMEN | 42    | 100,0%  | 0       | 0,0%    | 42    | 100,0%  |
| CO MEN                      | 23    | 100,0%  | 0       | 0,0%    | 23    | 100,0%  |
| RCMFE_PHASE4_SCALE_2_ WOMEN | 42    | 100,0%  | 0       | 0,0%    | 42    | 100,0%  |
| CO MEN                      | 23    | 100,0%  | 0       | 0,0%    | 23    | 100,0%  |
| RCMFE_PHASE4_SCALE_3_ WOMEN | 42    | 100,0%  | 0       | 0,0%    | 42    | 100,0%  |
| CO MEN                      | 23    | 100,0%  | 0       | 0,0%    | 23    | 100,0%  |
| RCMFE_PHASE4_SCALE_4_ WOMEN | 42    | 100,0%  | 0       | 0,0%    | 42    | 100,0%  |
| CO MEN                      | 23    | 100,0%  | 0       | 0,0%    | 23    | 100,0%  |
| RCMFE_PHASE4_SCALE_5_ WOMEN | 42    | 100,0%  | 0       | 0,0%    | 42    | 100,0%  |
| CO MEN                      | 23    | 100,0%  | 0       | 0,0%    | 23    | 100,0%  |
| RCMFE_PHASE5_SCALE_1_ WOMEN | 42    | 100,0%  | 0       | 0,0%    | 42    | 100,0%  |
| CO                          |       |         |         |         |       |         |

### Case Processing Summary

| GENDER                |       | Cases |         |         |         |       |         |
|-----------------------|-------|-------|---------|---------|---------|-------|---------|
|                       |       | Valid |         | Missing |         | Total |         |
|                       |       | N     | Percent | N       | Percent | N     | Percent |
| RCMFE_PHASE5_SCALE_1_ | MEN   | 23    | 100,0%  | 0       | 0,0%    | 23    | 100,0%  |
| CO                    |       |       |         |         |         |       |         |
| RCMFE_PHASE5_SCALE_2_ | WOMEN | 42    | 100,0%  | 0       | 0,0%    | 42    | 100,0%  |
| CO                    |       |       |         |         |         |       |         |
|                       | MEN   | 23    | 100,0%  | 0       | 0,0%    | 23    | 100,0%  |
| RCMFE_PHASE5_SCALE_3_ | WOMEN | 42    | 100,0%  | 0       | 0,0%    | 42    | 100,0%  |
| CO                    |       |       |         |         |         |       |         |
|                       | MEN   | 23    | 100,0%  | 0       | 0,0%    | 23    | 100,0%  |
| RCMFE_PHASE5_SCALE_4_ | WOMEN | 42    | 100,0%  | 0       | 0,0%    | 42    | 100,0%  |
| CO                    |       |       |         |         |         |       |         |
|                       | MEN   | 23    | 100,0%  | 0       | 0,0%    | 23    | 100,0%  |
| RCMFE_PHASE5_SCALE_5_ | WOMEN | 42    | 100,0%  | 0       | 0,0%    | 42    | 100,0%  |
| CO                    |       |       |         |         |         |       |         |
|                       | MEN   | 23    | 100,0%  | 0       | 0,0%    | 23    | 100,0%  |

### Tests of Normality

| GENDER                |       | Kolmogorov-Smirnov <sup>a</sup> |    |       | Shapiro-Wilk |    |      |
|-----------------------|-------|---------------------------------|----|-------|--------------|----|------|
|                       |       | Statistic                       | df | Sig.  | Statistic    | df | Sig. |
| RCMFE_PHASE1_SCALE_1_ | WOMEN | ,078                            | 42 | ,200* | ,982         | 42 | ,729 |
| CO                    |       |                                 |    |       |              |    |      |
|                       | MEN   | ,125                            | 23 | ,200* | ,951         | 23 | ,301 |
| RCMFE_PHASE1_SCALE_2_ | WOMEN | ,075                            | 42 | ,200* | ,985         | 42 | ,838 |
| CO                    |       |                                 |    |       |              |    |      |
|                       | MEN   | ,123                            | 23 | ,200* | ,947         | 23 | ,257 |
| RCMFE_PHASE1_SCALE_3_ | WOMEN | ,109                            | 42 | ,200* | ,962         | 42 | ,170 |
| CO                    |       |                                 |    |       |              |    |      |
|                       | MEN   | ,134                            | 23 | ,200* | ,945         | 23 | ,235 |
| RCMFE_PHASE1_SCALE_4_ | WOMEN | ,120                            | 42 | ,141  | ,970         | 42 | ,328 |
| CO                    |       |                                 |    |       |              |    |      |
|                       | MEN   | ,123                            | 23 | ,200* | ,955         | 23 | ,374 |
| RCMFE_PHASE1_SCALE_5_ | WOMEN | ,068                            | 42 | ,200* | ,979         | 42 | ,642 |
| CO                    |       |                                 |    |       |              |    |      |
|                       | MEN   | ,088                            | 23 | ,200* | ,969         | 23 | ,654 |
| RCMFE_PHASE2_SCALE_1_ | WOMEN | ,065                            | 42 | ,200* | ,976         | 42 | ,501 |
| CO                    |       |                                 |    |       |              |    |      |
|                       | MEN   | ,122                            | 23 | ,200* | ,971         | 23 | ,710 |
| RCMFE_PHASE2_SCALE_2_ | WOMEN | ,081                            | 42 | ,200* | ,989         | 42 | ,957 |
| CO                    |       |                                 |    |       |              |    |      |
|                       | MEN   | ,093                            | 23 | ,200* | ,981         | 23 | ,922 |
| RCMFE_PHASE2_SCALE_3_ | WOMEN | ,085                            | 42 | ,200* | ,973         | 42 | ,417 |
| CO                    |       |                                 |    |       |              |    |      |
|                       | MEN   | ,120                            | 23 | ,200* | ,974         | 23 | ,792 |
| RCMFE_PHASE2_SCALE_4_ | WOMEN | ,105                            | 42 | ,200* | ,960         | 42 | ,144 |
| CO                    |       |                                 |    |       |              |    |      |
|                       | MEN   | ,087                            | 23 | ,200* | ,976         | 23 | ,829 |
| RCMFE_PHASE2_SCALE_5_ | WOMEN | ,150                            | 42 | ,069  | ,895         | 42 | ,001 |
| CO                    |       |                                 |    |       |              |    |      |
|                       | MEN   | ,086                            | 23 | ,200* | ,970         | 23 | ,686 |
| RCMFE_PHASE3_SCALE_1_ | WOMEN | ,070                            | 42 | ,200* | ,974         | 42 | ,455 |
| CO                    |       |                                 |    |       |              |    |      |
|                       | MEN   | ,224                            | 23 | ,054  | ,853         | 23 | ,003 |
| RCMFE_PHASE3_SCALE_2_ | WOMEN | ,123                            | 42 | ,114  | ,969         | 42 | ,297 |
| CO                    |       |                                 |    |       |              |    |      |
|                       | MEN   | ,081                            | 23 | ,200* | ,965         | 23 | ,582 |
| RCMFE_PHASE3_SCALE_3_ | WOMEN | ,042                            | 42 | ,200* | ,989         | 42 | ,960 |
| CO                    |       |                                 |    |       |              |    |      |
|                       | MEN   | ,164                            | 23 | ,110  | ,964         | 23 | ,547 |
| RCMFE_PHASE3_SCALE_4_ | WOMEN | ,100                            | 42 | ,200* | ,974         | 42 | ,448 |
| CO                    |       |                                 |    |       |              |    |      |
|                       | MEN   | ,082                            | 23 | ,200* | ,987         | 23 | ,985 |
| RCMFE_PHASE3_SCALE_5_ | WOMEN | ,114                            | 42 | ,192  | ,973         | 42 | ,423 |

|                       |       |      |    |       |      |    |      |
|-----------------------|-------|------|----|-------|------|----|------|
| CO                    | MEN   | ,104 | 23 | ,200* | ,973 | 23 | ,769 |
| RCMFE_PHASE4_SCALE_1_ | WOMEN | ,201 | 42 | ,040  | ,775 | 42 | ,070 |
| CO                    | MEN   | ,143 | 23 | ,200* | ,952 | 23 | ,318 |
| RCMFE_PHASE4_SCALE_2_ | WOMEN | ,196 | 42 | ,050  | ,778 | 42 | ,060 |
| CO                    | MEN   | ,131 | 23 | ,200* | ,950 | 23 | ,295 |
| RCMFE_PHASE4_SCALE_3_ | WOMEN | ,135 | 42 | ,051  | ,848 | 42 | ,020 |
|                       | MEN   | ,153 | 23 | ,175  | ,940 | 23 | ,178 |
| RCMFE_PHASE4_SCALE_4_ | WOMEN | ,169 | 42 | ,004  | ,849 | 42 | ,050 |
| CO                    | MEN   | ,161 | 23 | ,124  | ,949 | 23 | ,282 |
| RCMFE_PHASE4_SCALE_5_ | WOMEN | ,144 | 42 | ,028  | ,857 | 42 | ,060 |
| CO                    | MEN   | ,186 | 23 | ,038  | ,922 | 23 | ,074 |
| RCMFE_PHASE5_SCALE_1_ | WOMEN | ,074 | 42 | ,200* | ,977 | 42 | ,545 |
| CO                    | MEN   | ,087 | 23 | ,200* | ,968 | 23 | ,633 |

#### Tests of Normality

| GENDER                      | Kolmogorov-Smirnov <sup>a</sup> |    |       | Shapiro-Wilk |    |      |
|-----------------------------|---------------------------------|----|-------|--------------|----|------|
|                             | Statistic                       | df | Sig.  | Statistic    | df | Sig. |
| RCMFE_PHASE5_SCALE_2_ WOMEN | ,061                            | 42 | ,200* | ,976         | 42 | ,521 |
| CO MEN                      | ,157                            | 23 | ,149* | ,937         | 23 | ,157 |
| RCMFE_PHASE5_SCALE_3_ WOMEN | ,095                            | 42 | ,200* | ,972         | 42 | ,373 |
| CO MEN                      | ,077                            | 23 | ,200* | ,949         | 23 | ,283 |
| RCMFE_PHASE5_SCALE_4_ WOMEN | ,101                            | 42 | ,200* | ,958         | 42 | ,125 |
| CO MEN                      | ,117                            | 23 | ,200* | ,952         | 23 | ,317 |
| RCMFE_PHASE5_SCALE_5_ WOMEN | ,142                            | 42 | ,033  | ,942         | 42 | ,533 |
| CO MEN                      | ,176                            | 23 | ,063* | ,952         | 23 | ,322 |

\*. This is a lower bound of the true significance.

a. Lilliefors Significance Correction

Normal Q-Q Plots

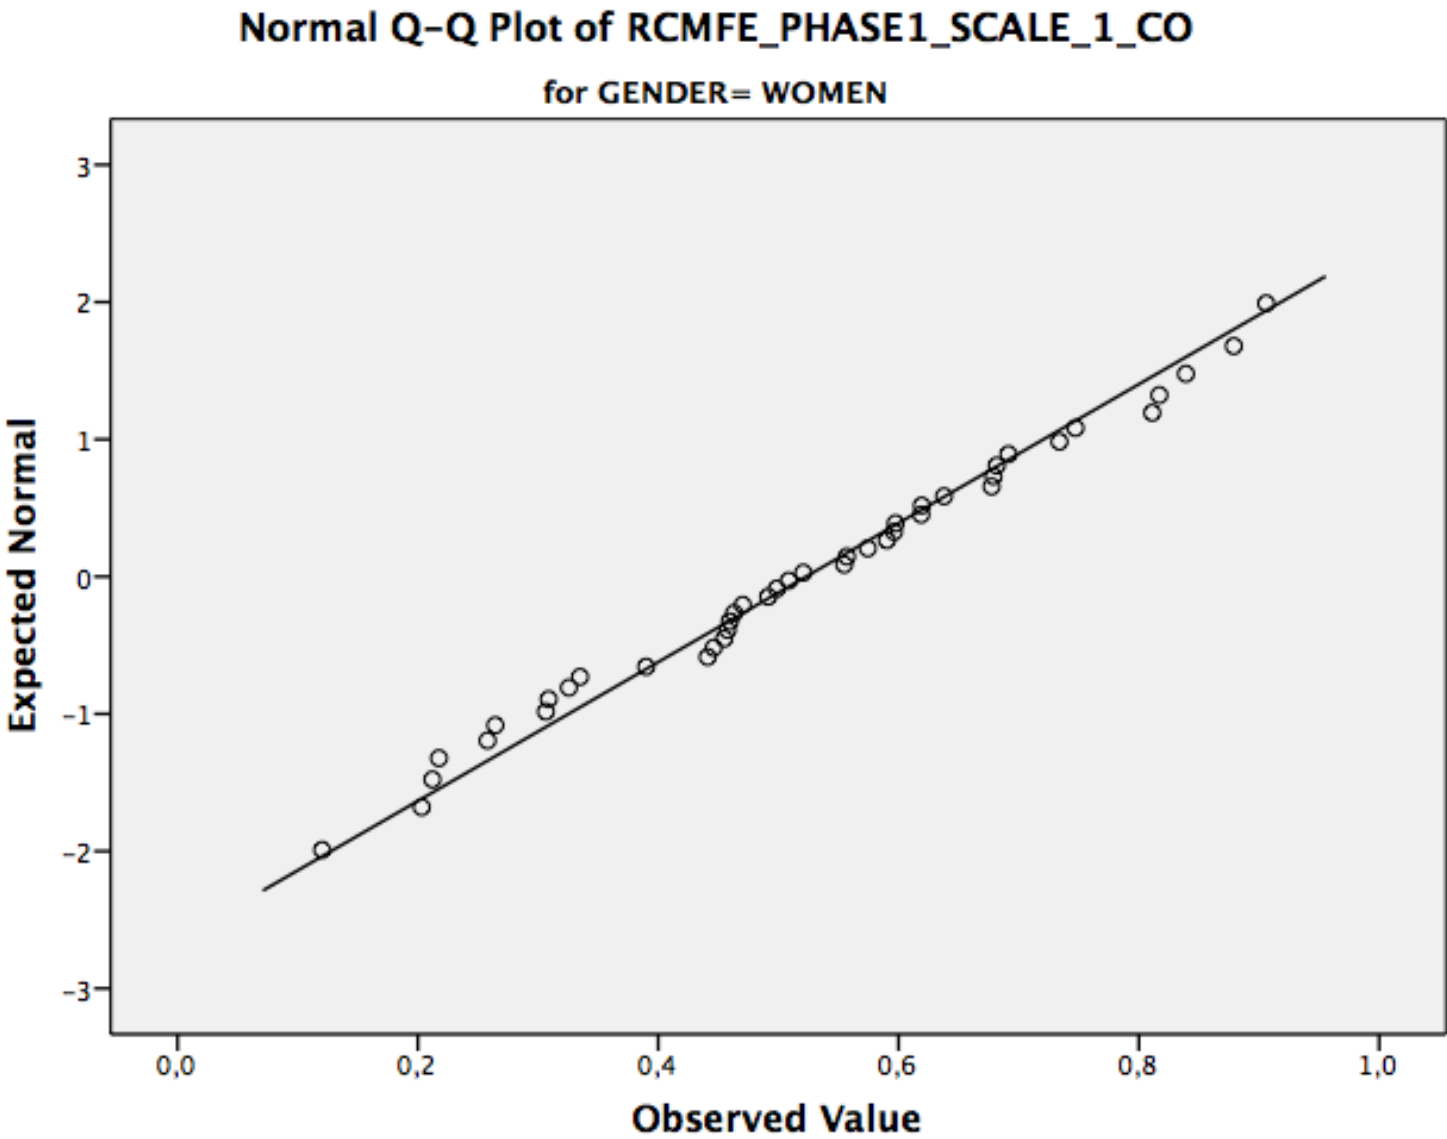



# Normal Q-Q Plot of RCMFE\_PHASE1\_SCALE\_1\_CO

for GENDER= MEN

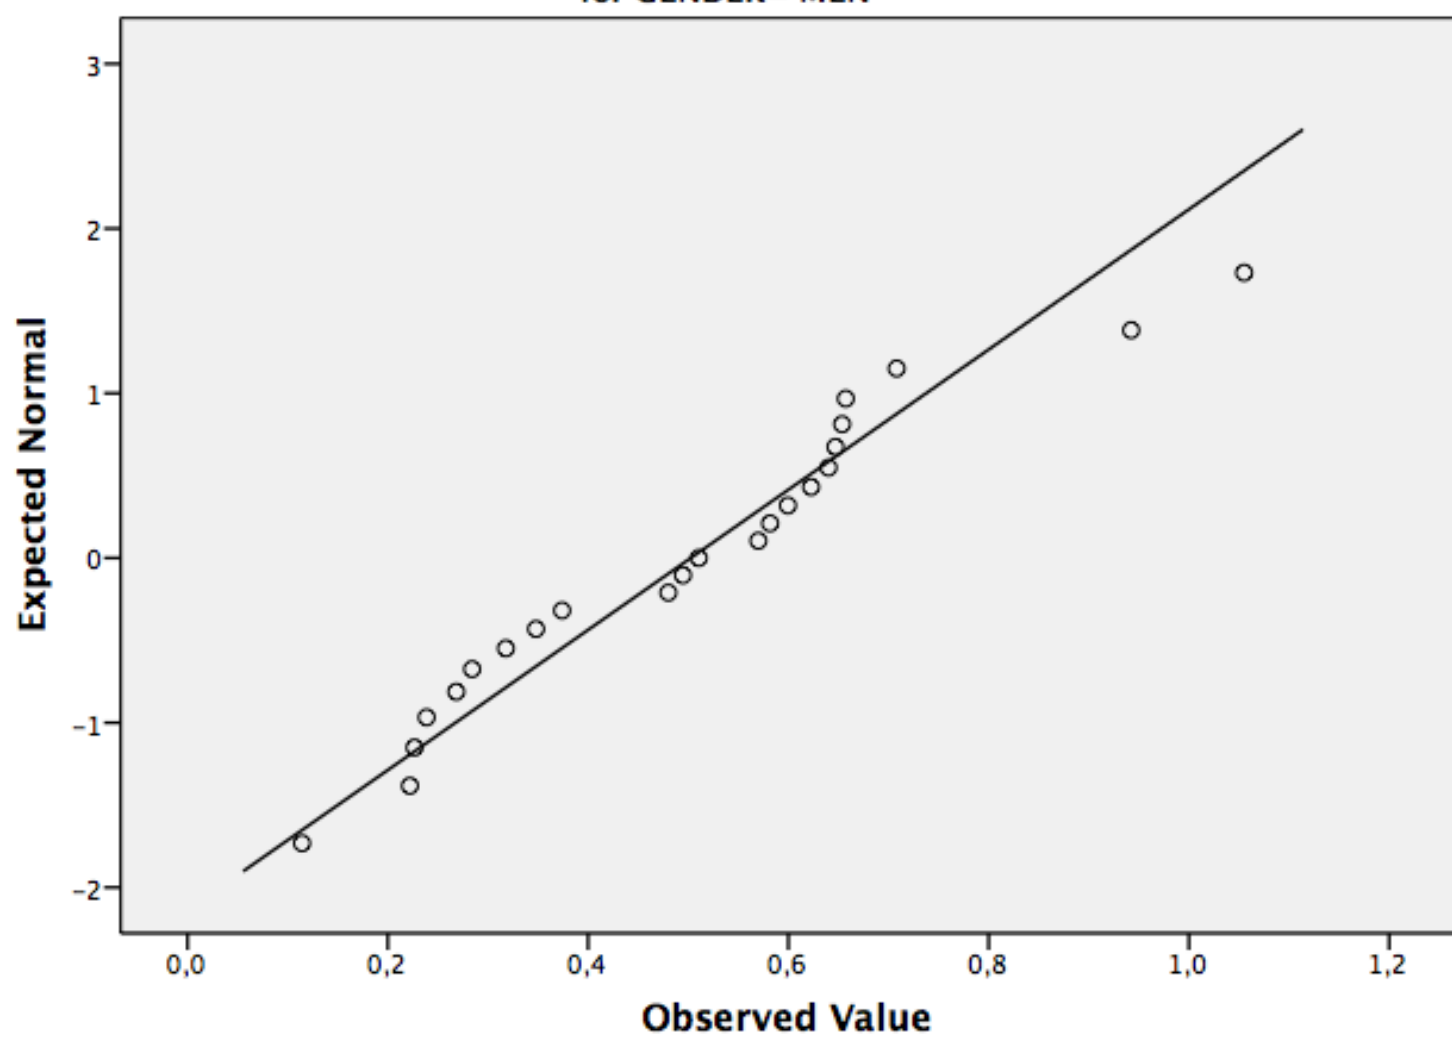

Normal Q-Q Plots

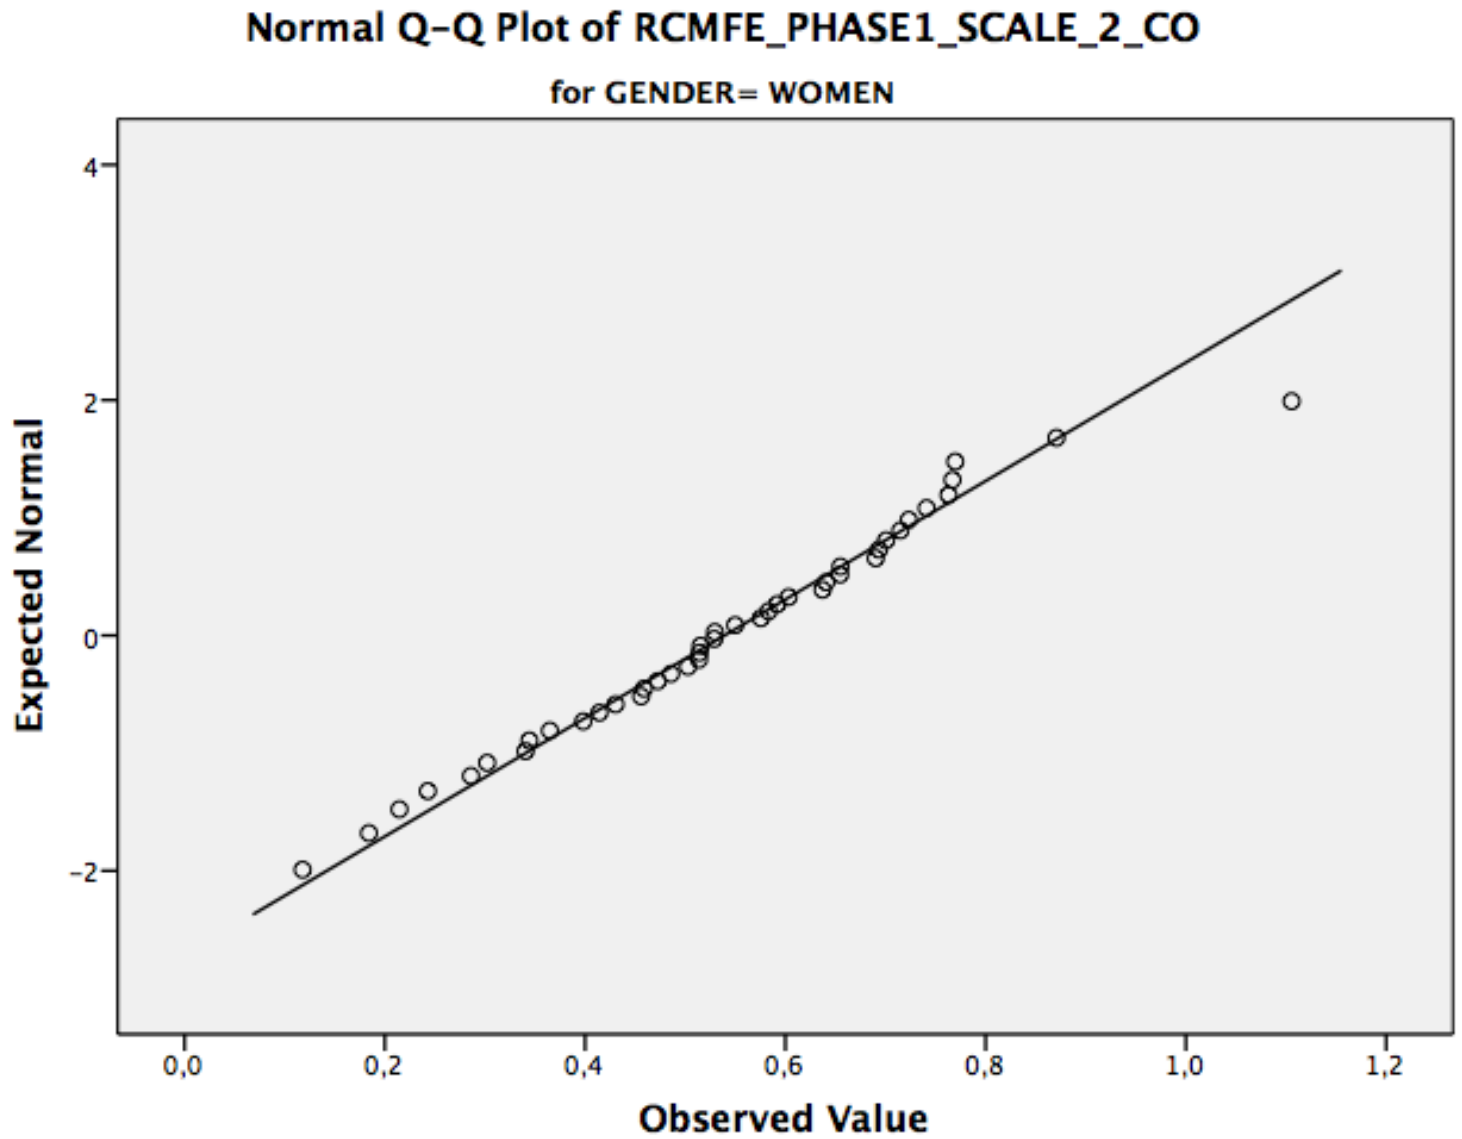

# Normal Q-Q Plot of RCMFE\_PHASE1\_SCALE\_2\_CO

for GENDER= MEN

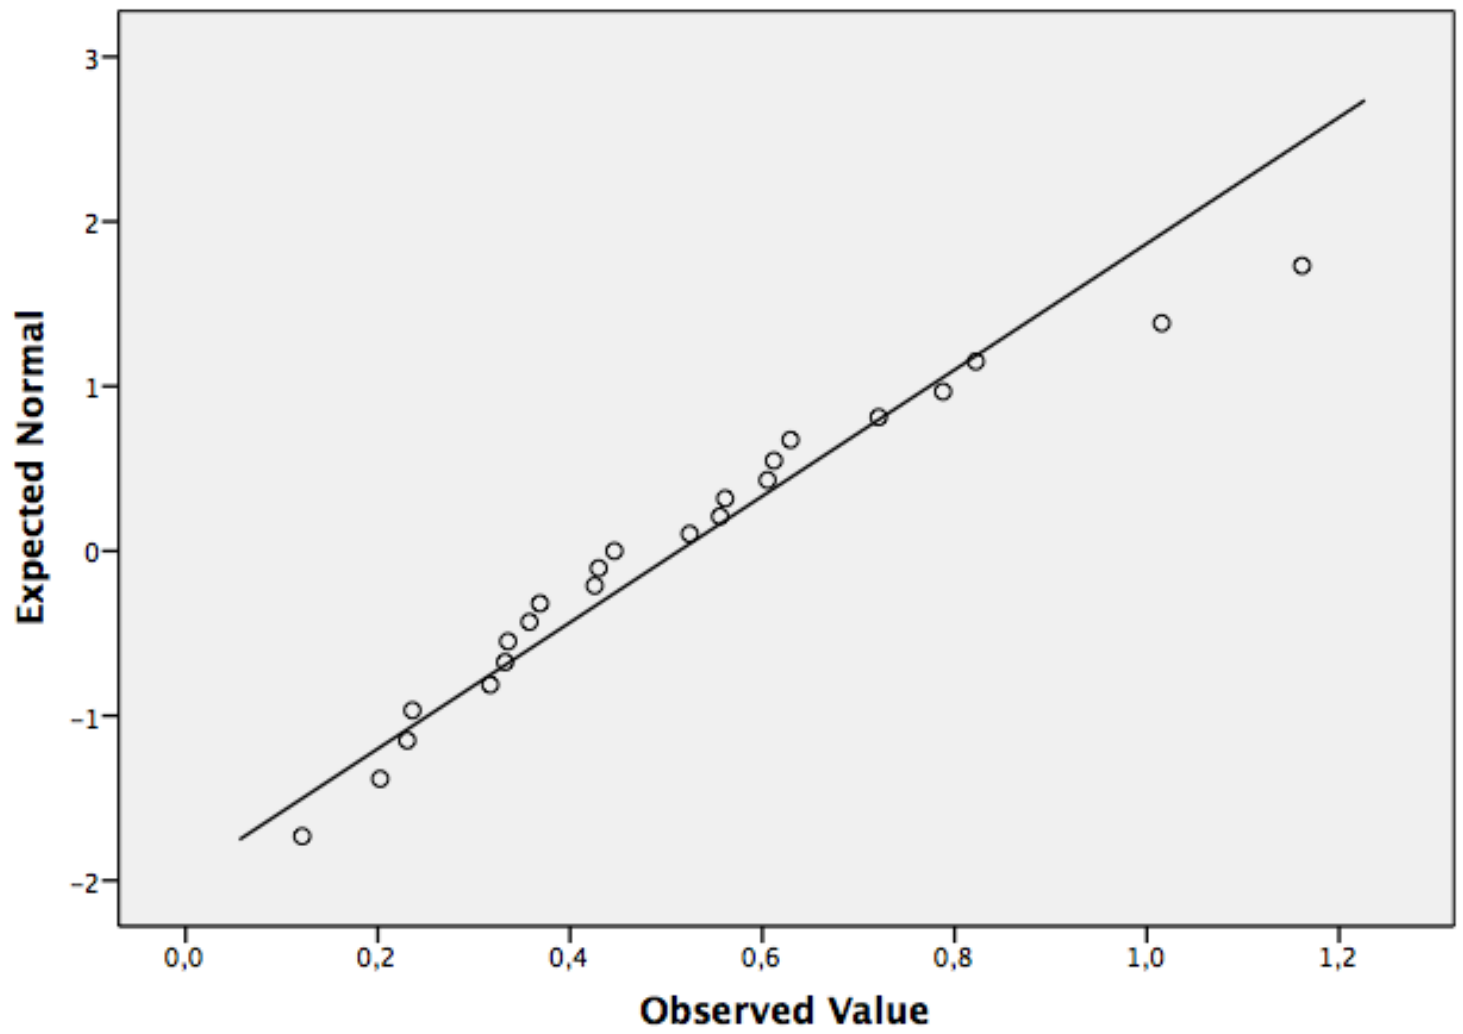

Normal Q-Q Plots

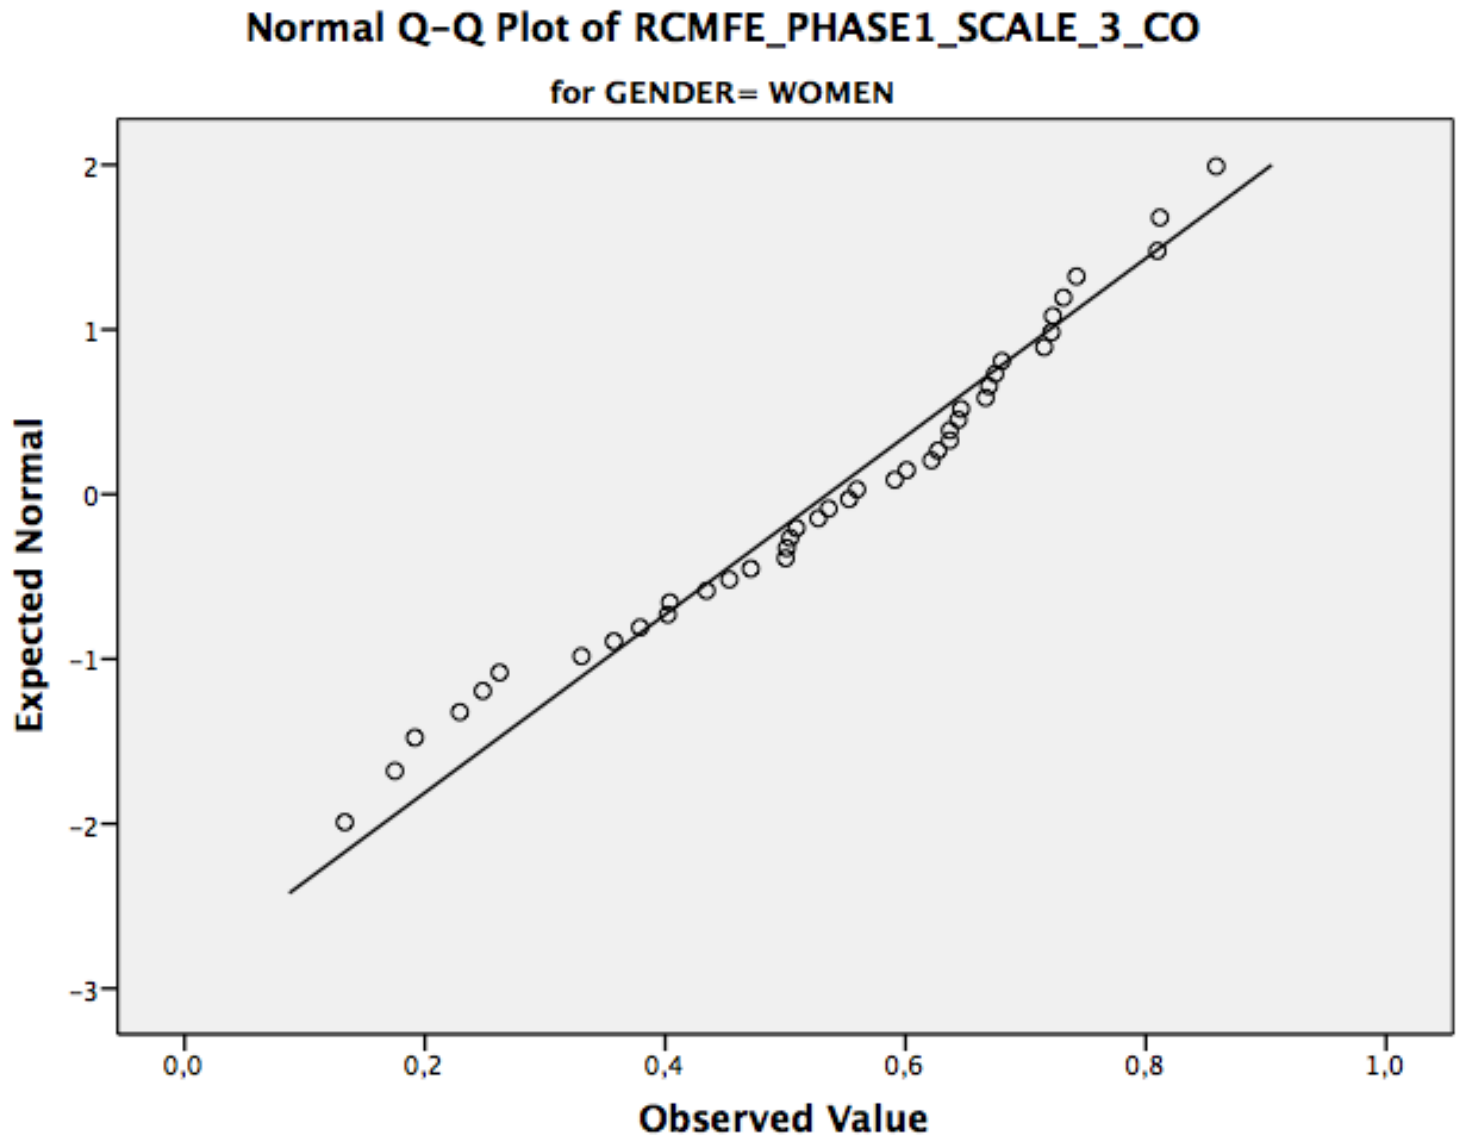

# Normal Q-Q Plot of RCMFE\_PHASE1\_SCALE\_3\_CO

for GENDER= MEN

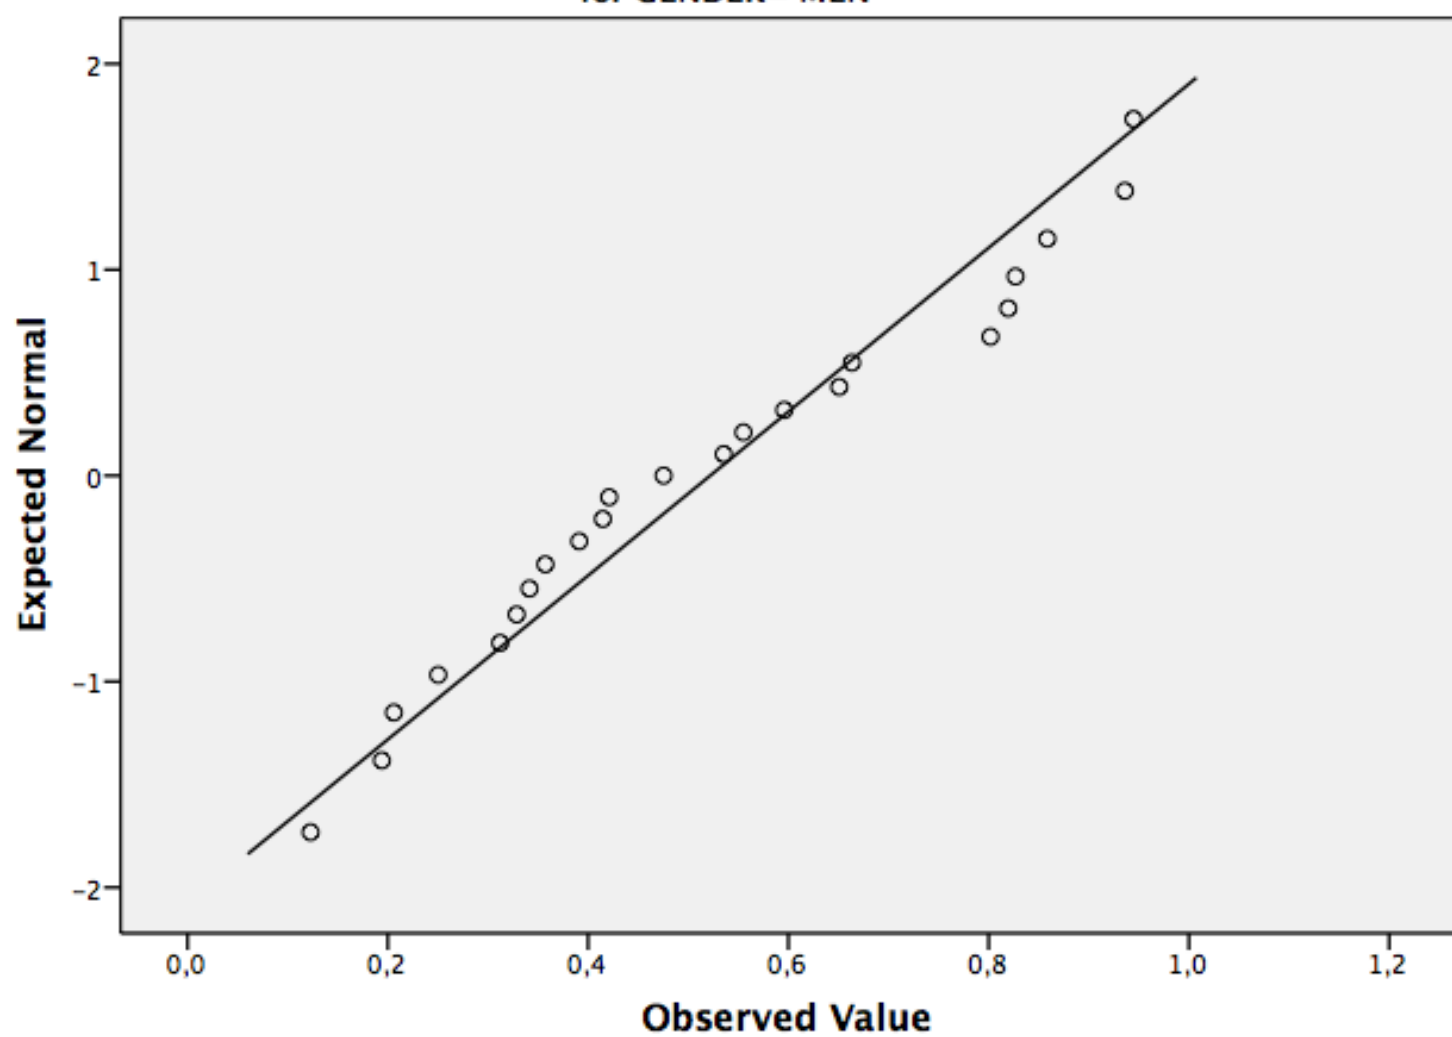

Normal Q-Q Plots

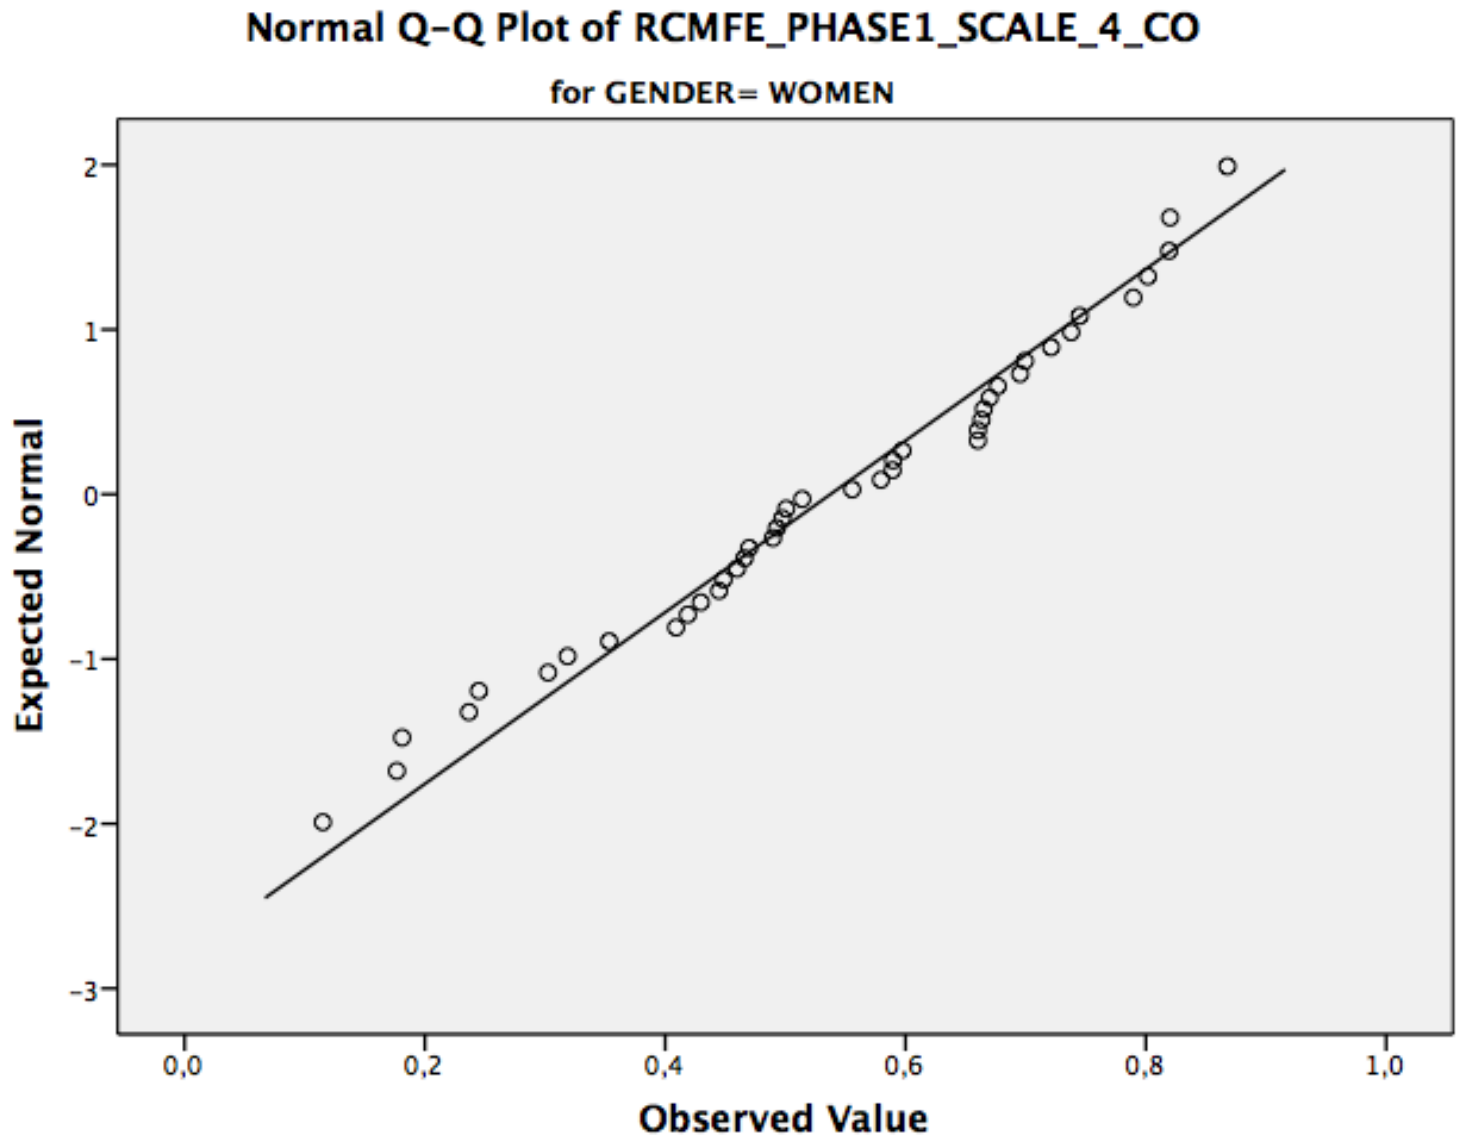

# Normal Q-Q Plot of RCMFE\_PHASE1\_SCALE\_4\_CO

for GENDER= MEN

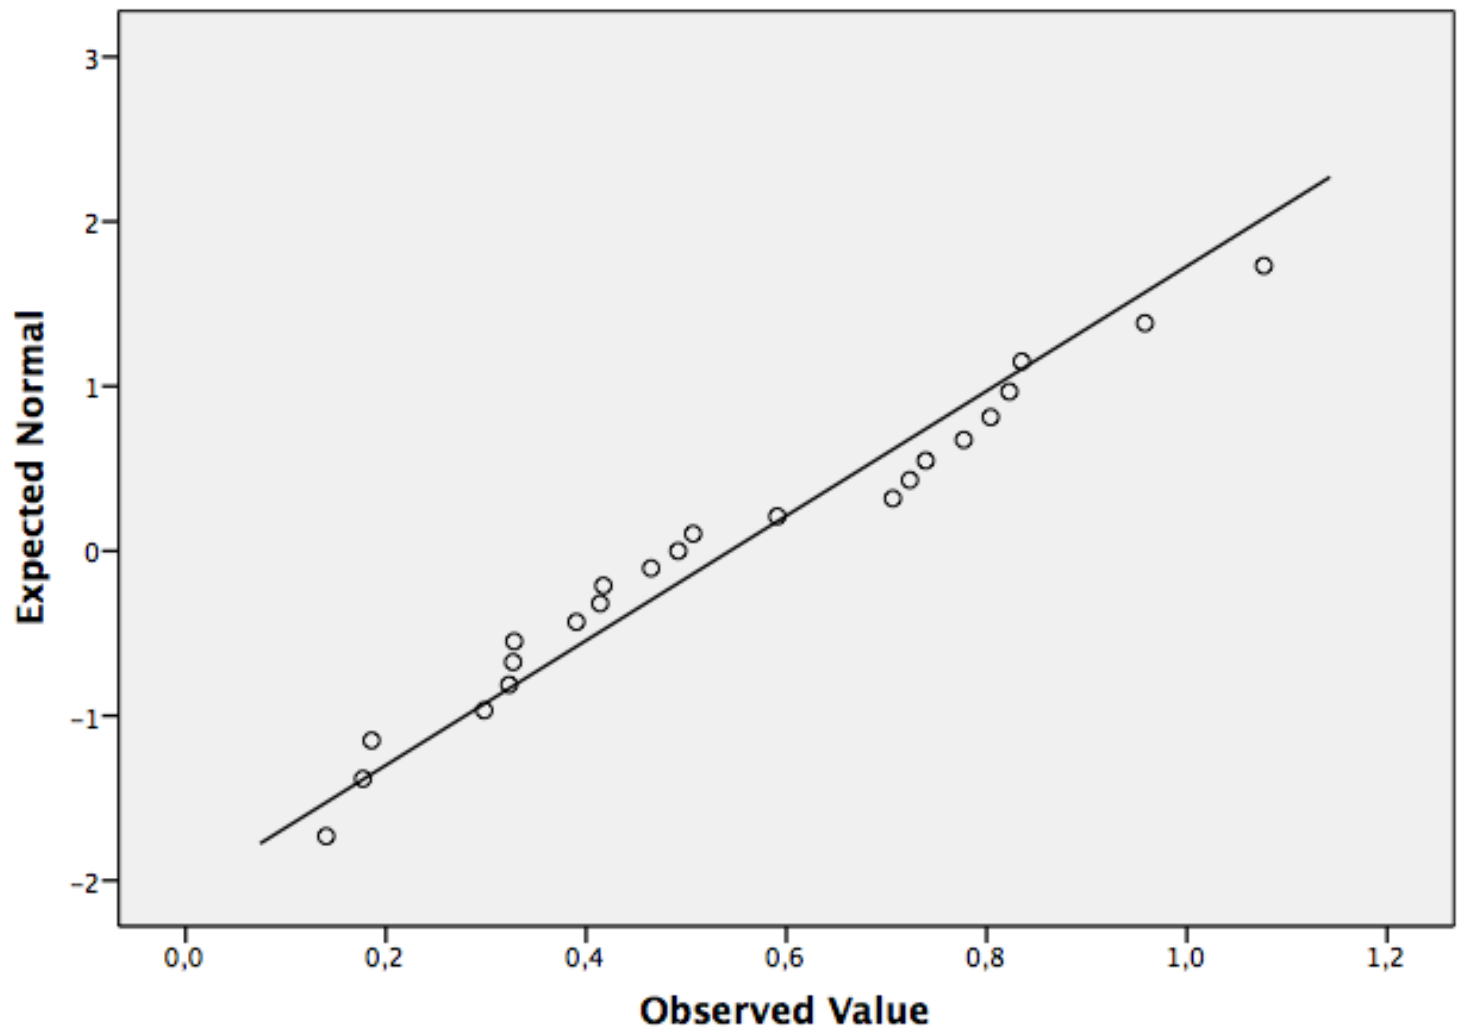

Normal Q-Q Plots

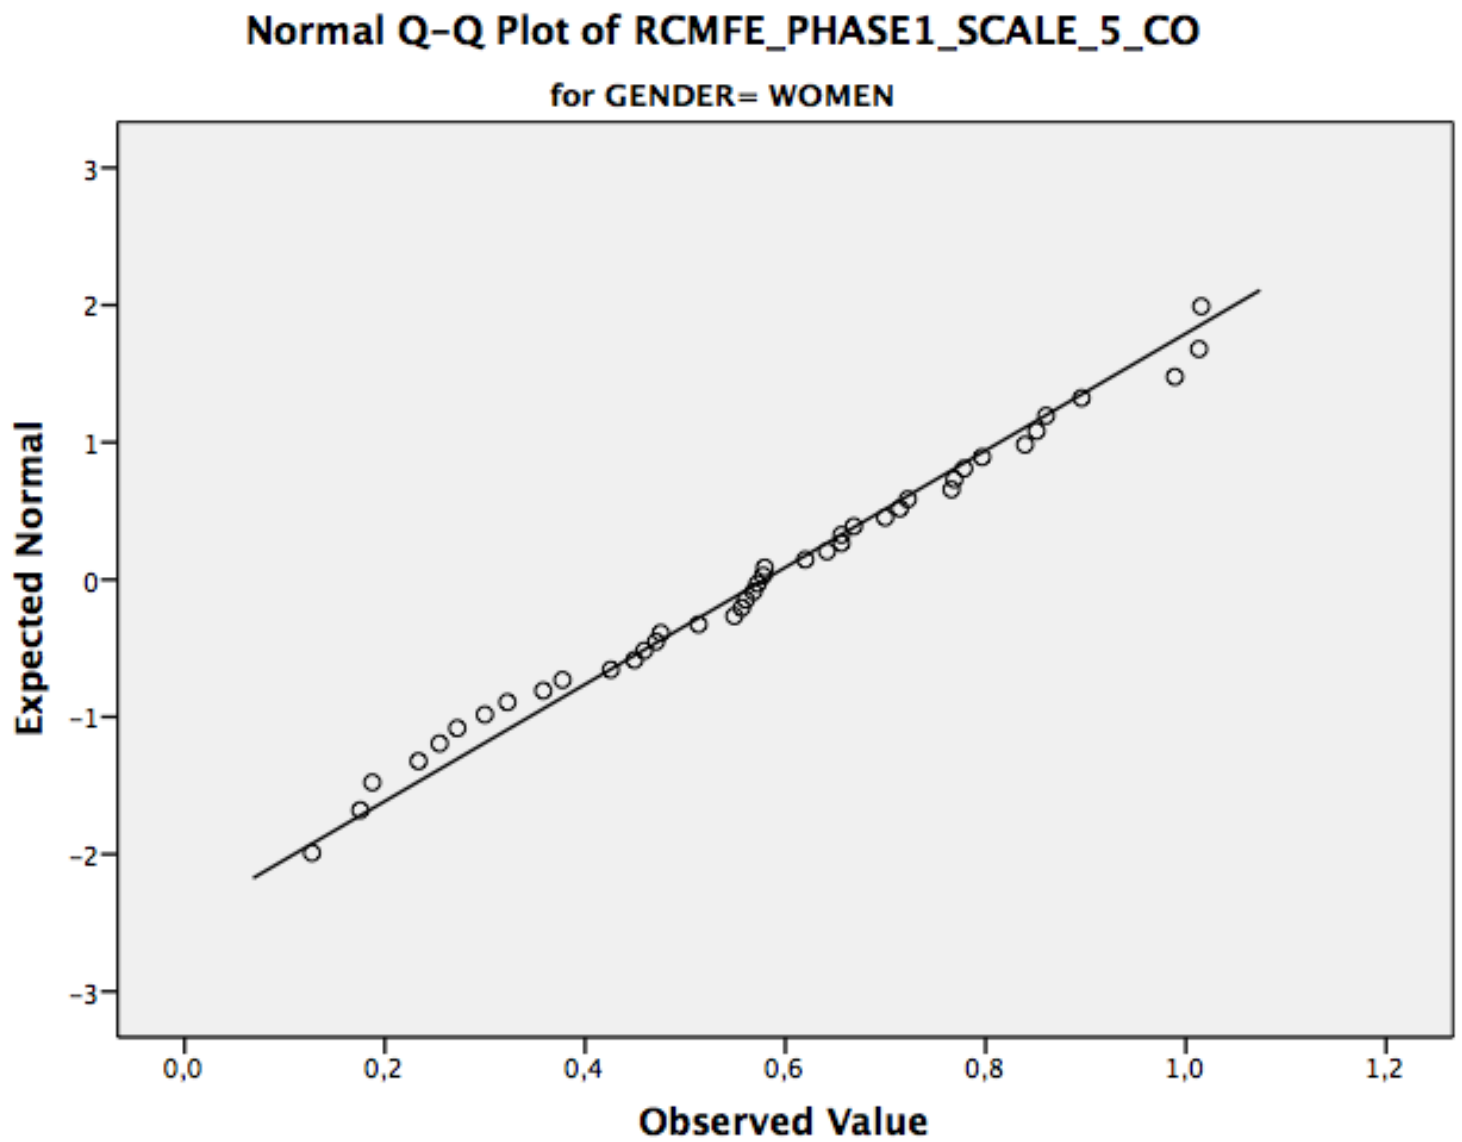



# Normal Q-Q Plot of RCMFE\_PHASE1\_SCALE\_5\_CO

for GENDER= MEN

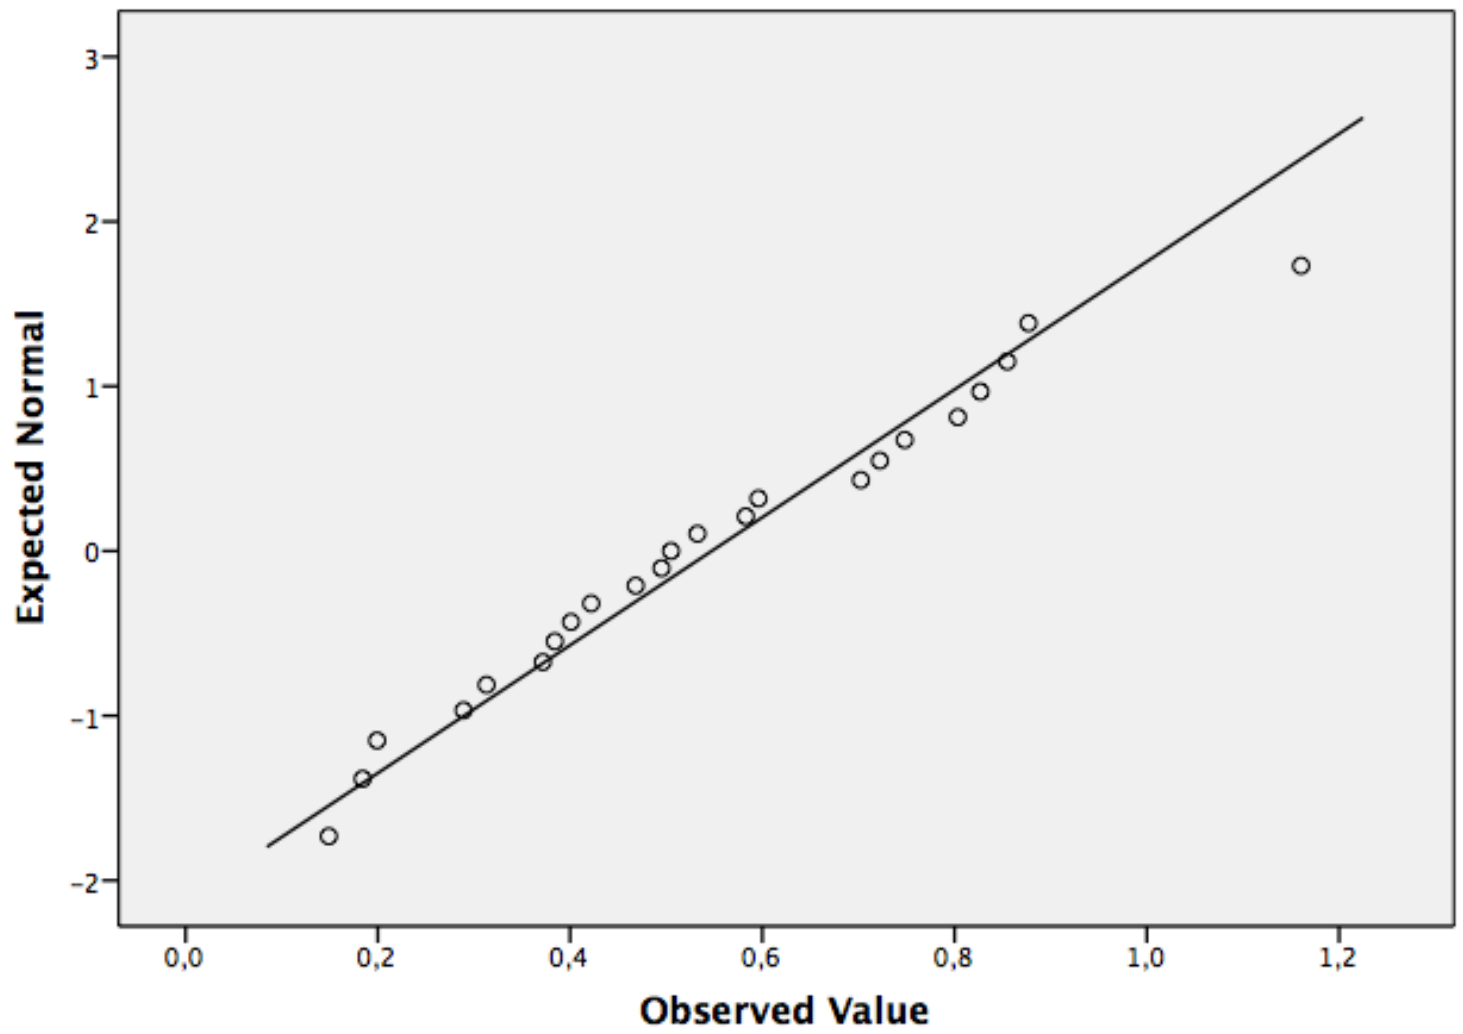

Normal Q-Q Plots

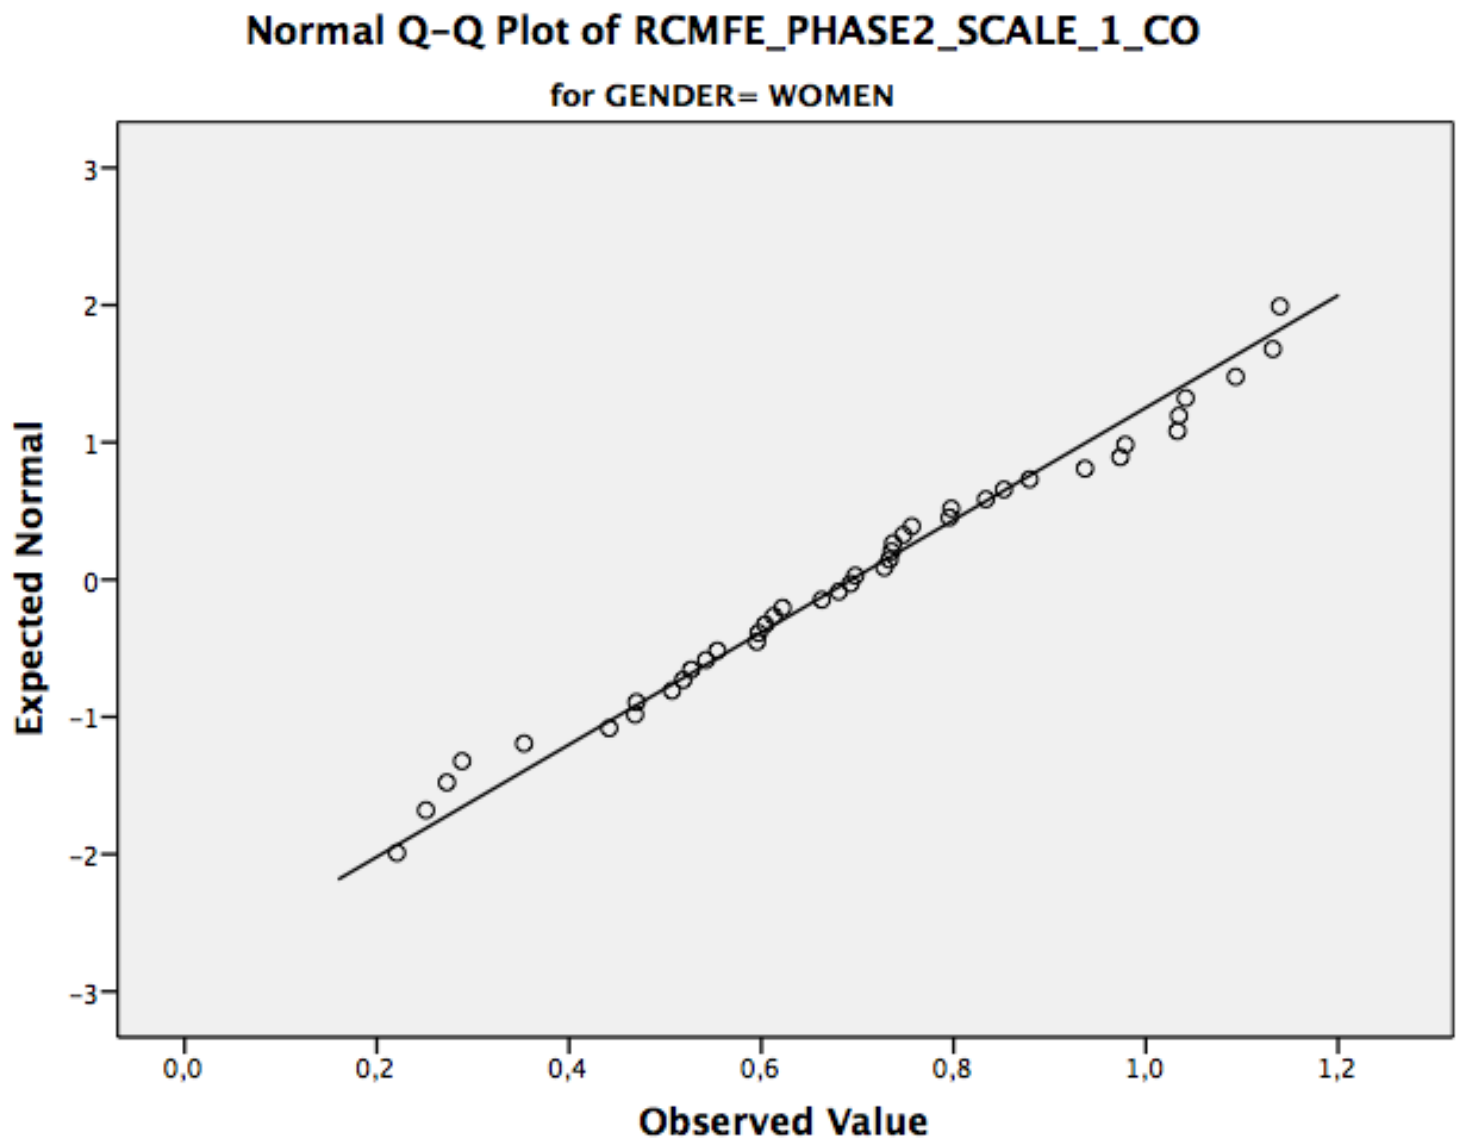

# Normal Q-Q Plot of RCMFE\_PHASE2\_SCALE\_1\_CO

for GENDER= MEN

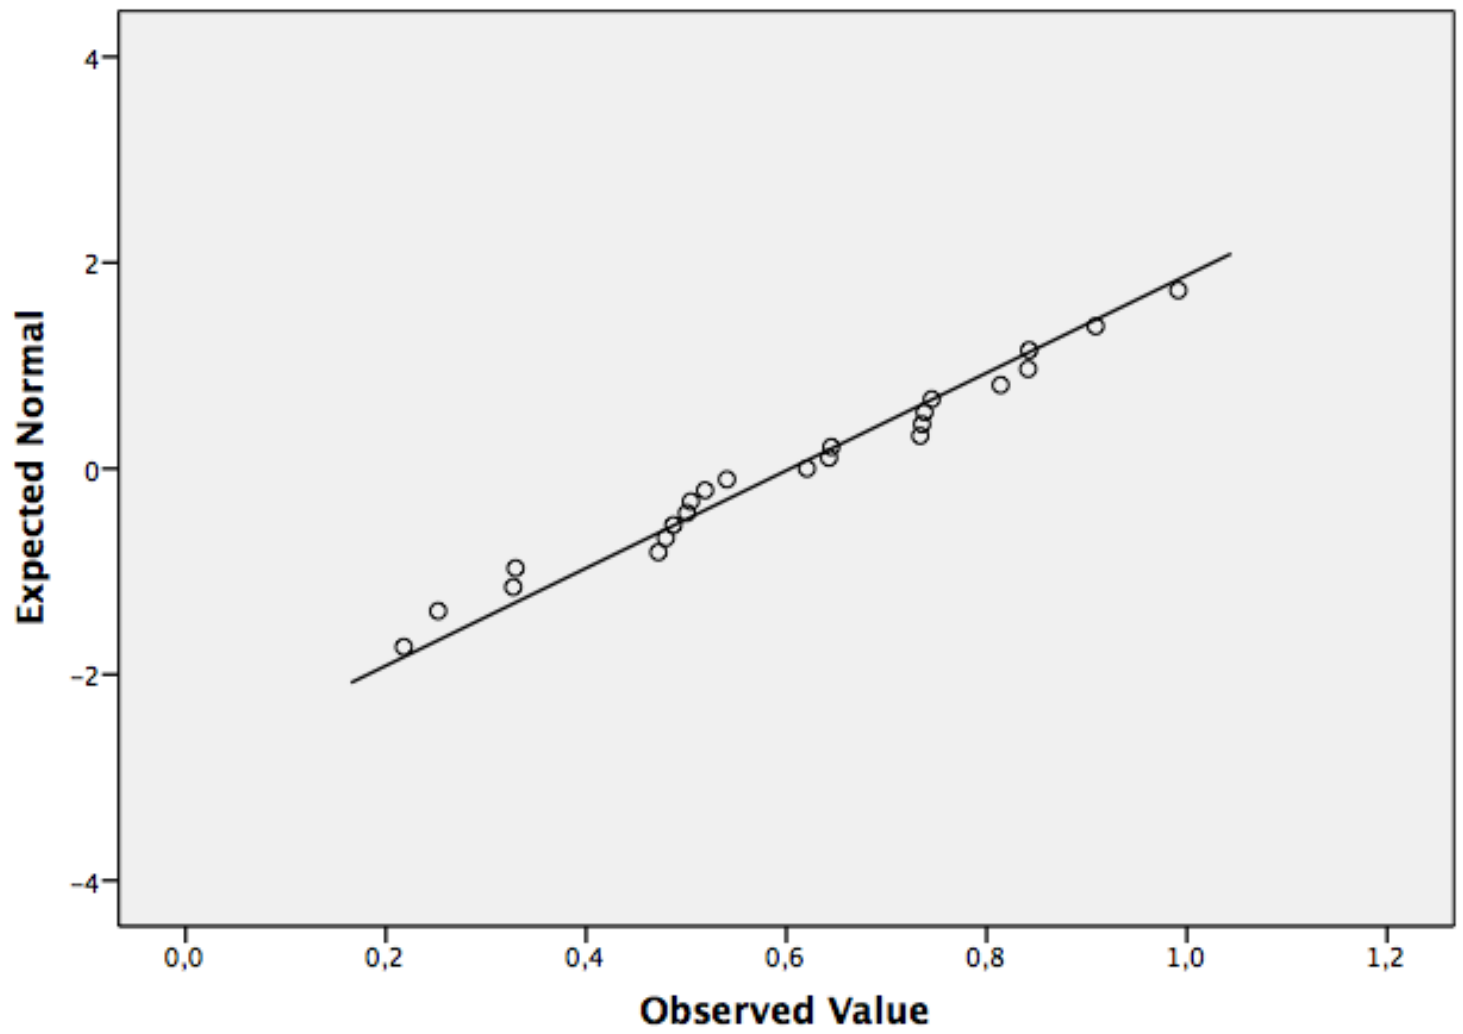

Normal Q-Q Plots

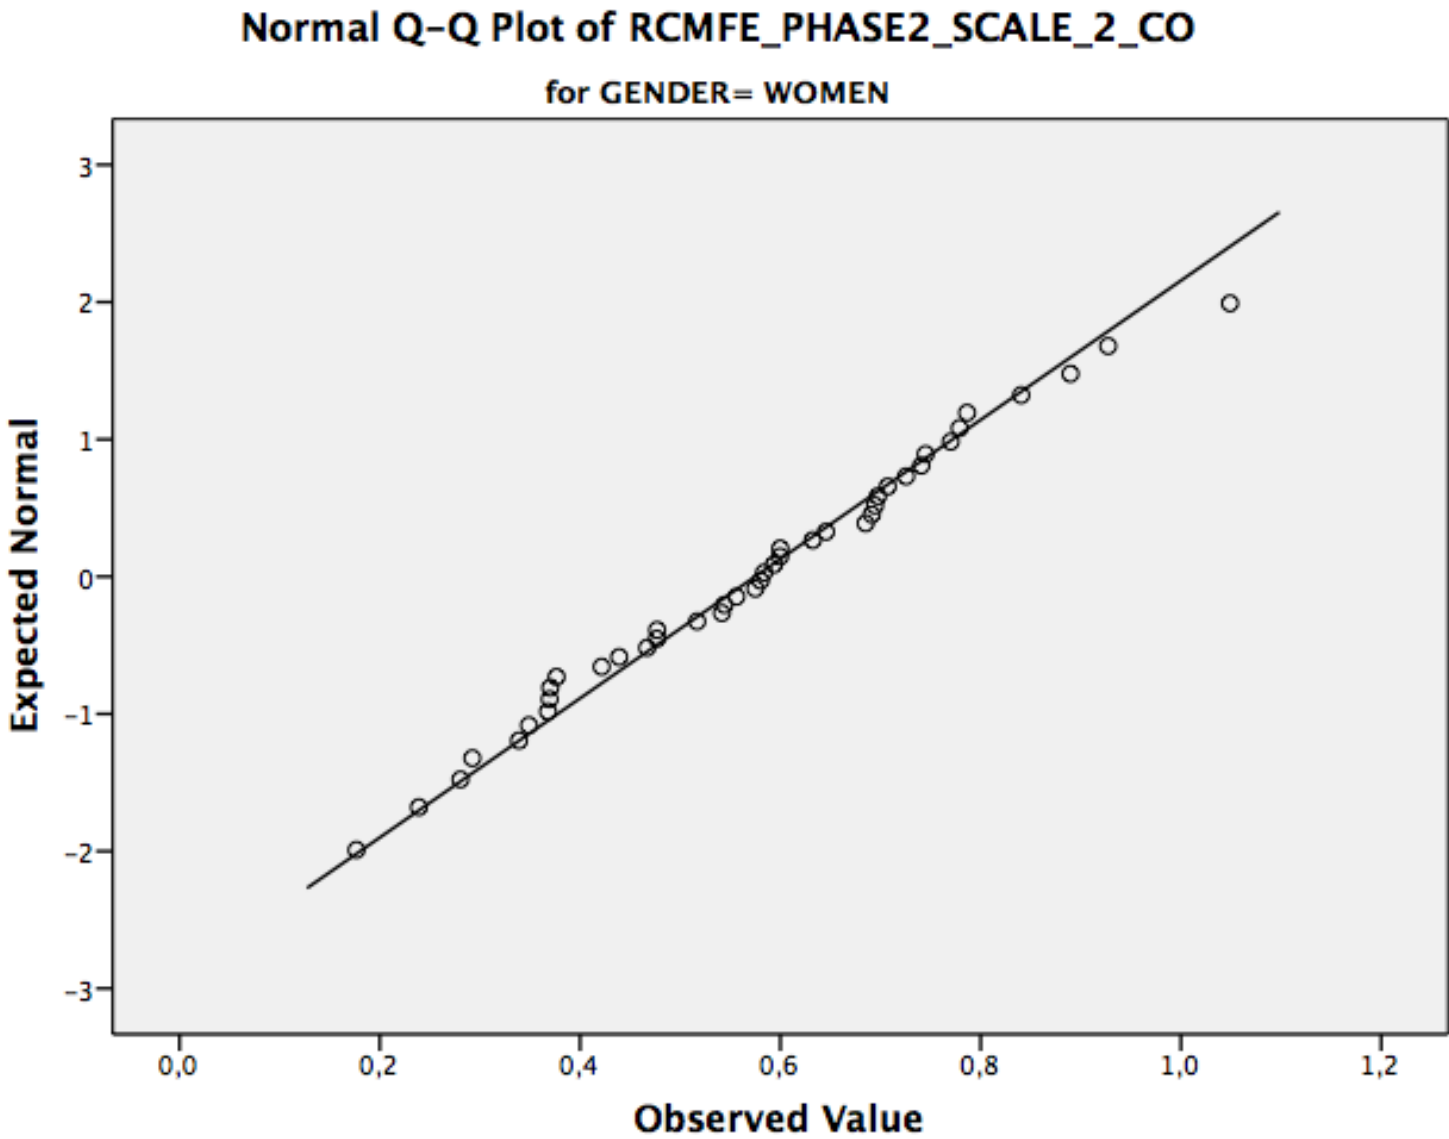

# Normal Q-Q Plot of RCMFE\_PHASE2\_SCALE\_2\_CO

for GENDER= MEN

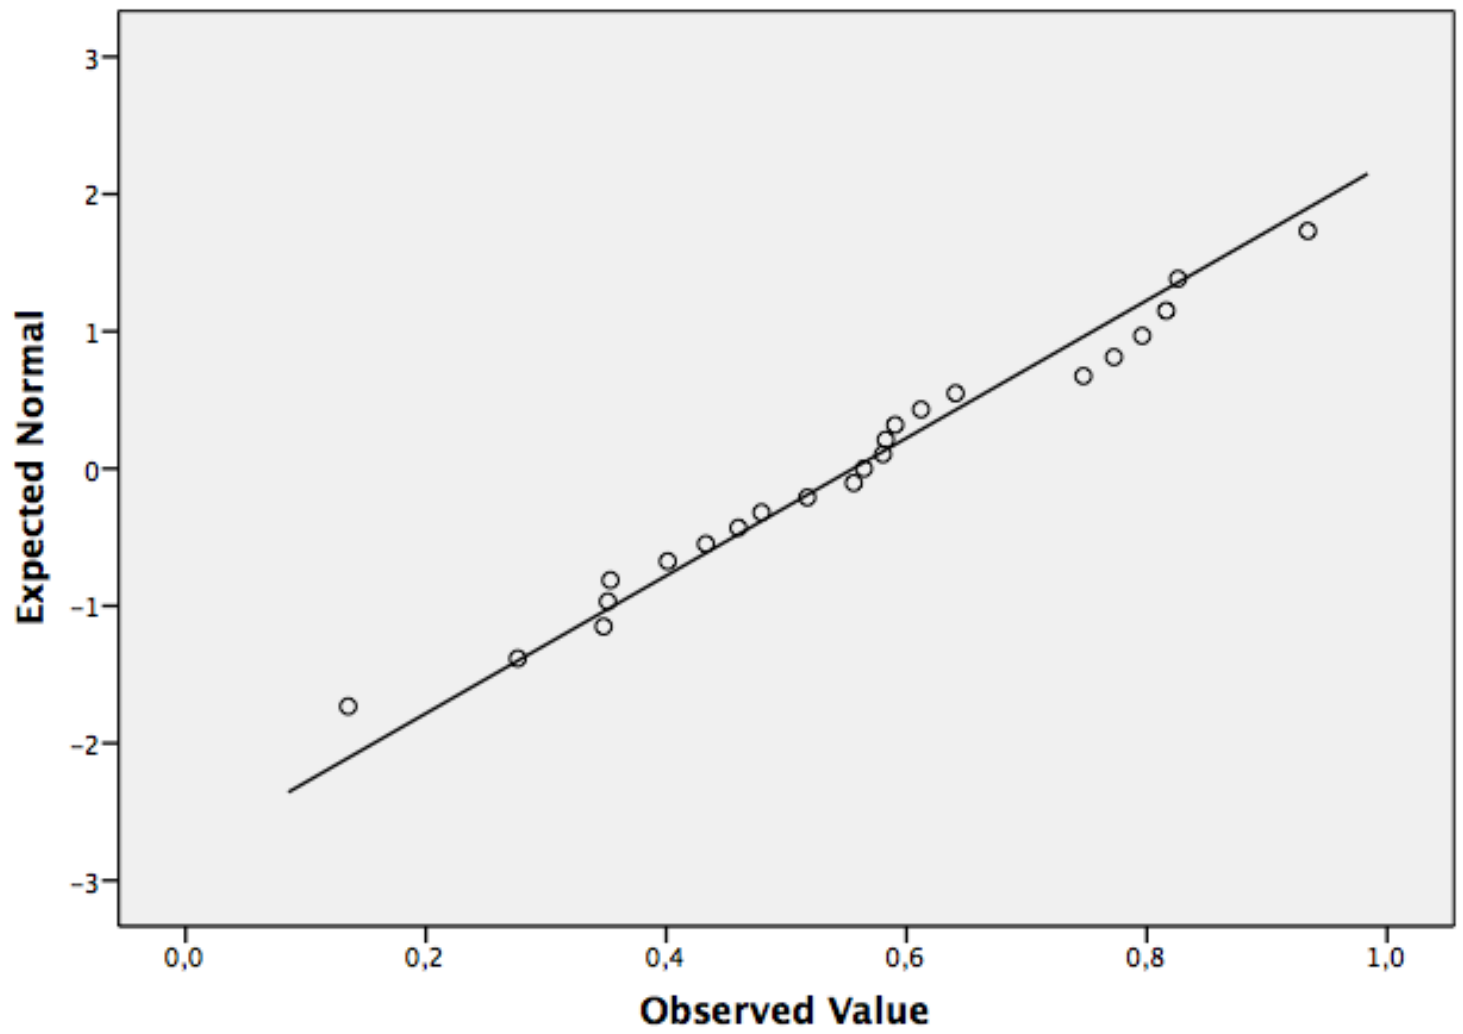

Normal Q-Q Plots

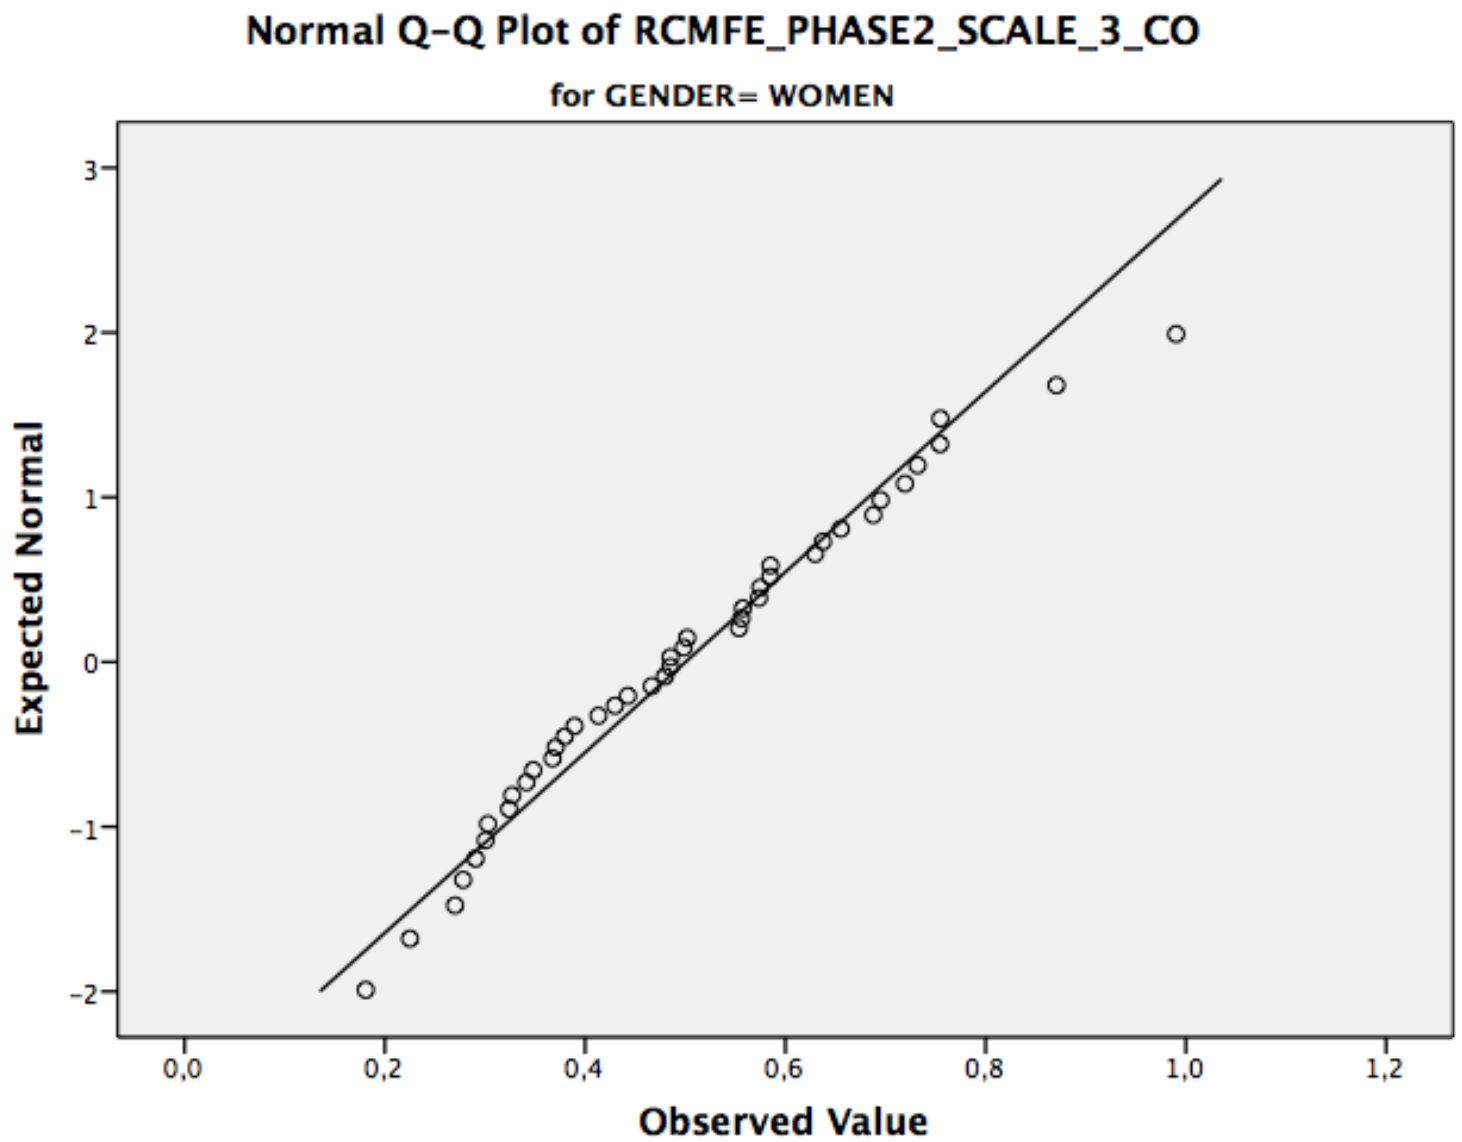

# Normal Q-Q Plot of RCMFE\_PHASE2\_SCALE\_3\_CO

for GENDER= MEN

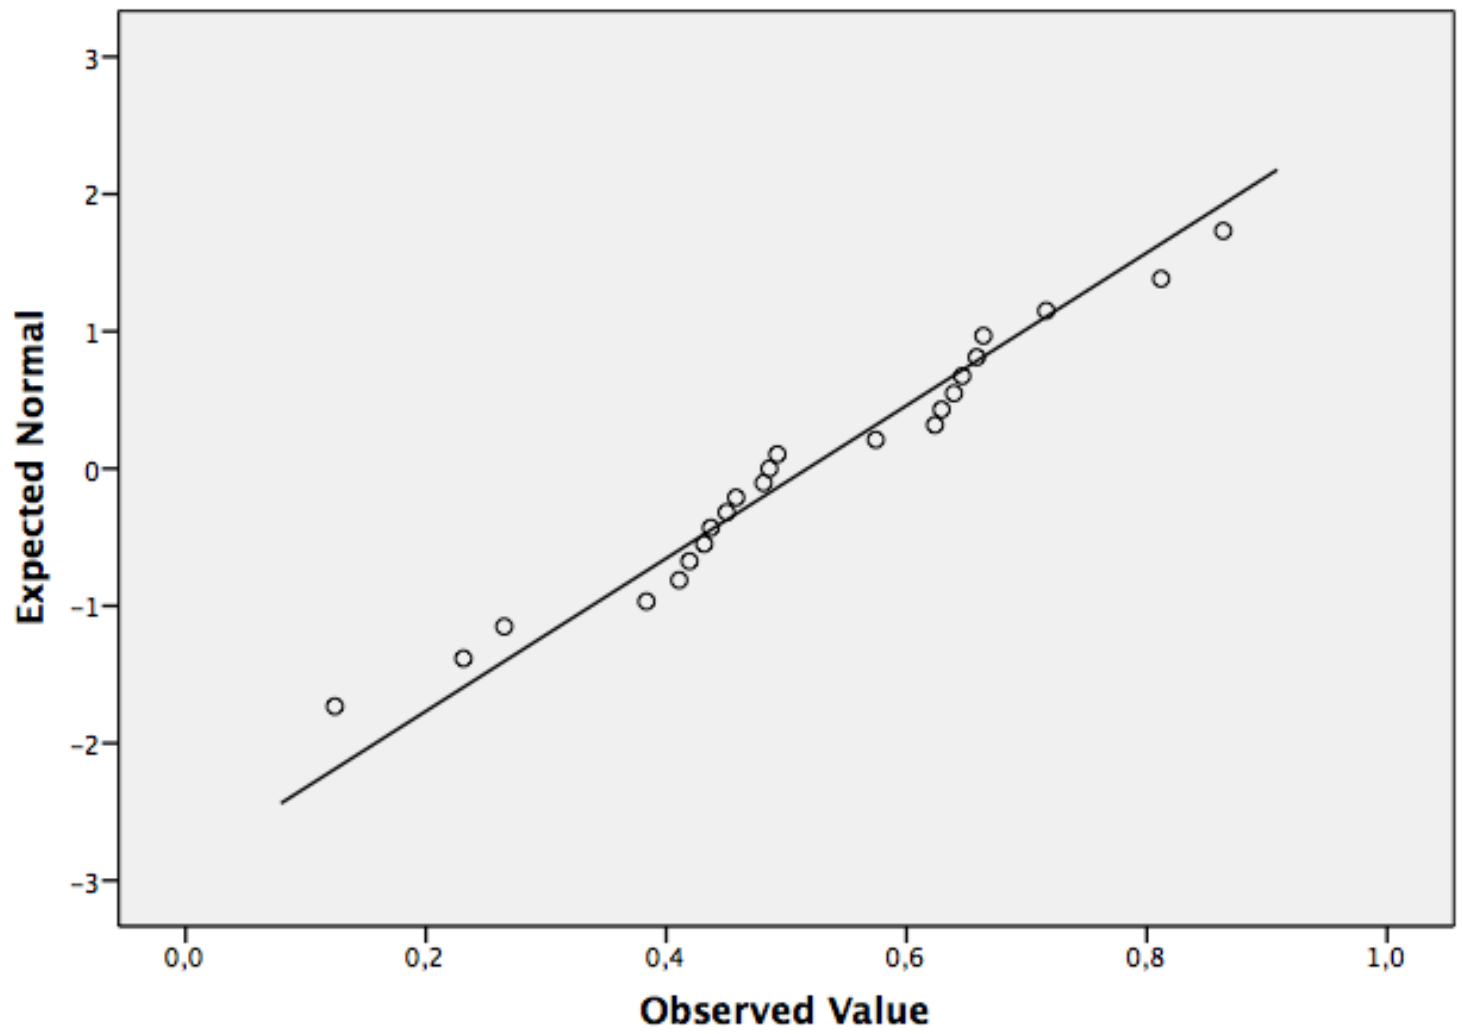

Normal Q-Q Plots

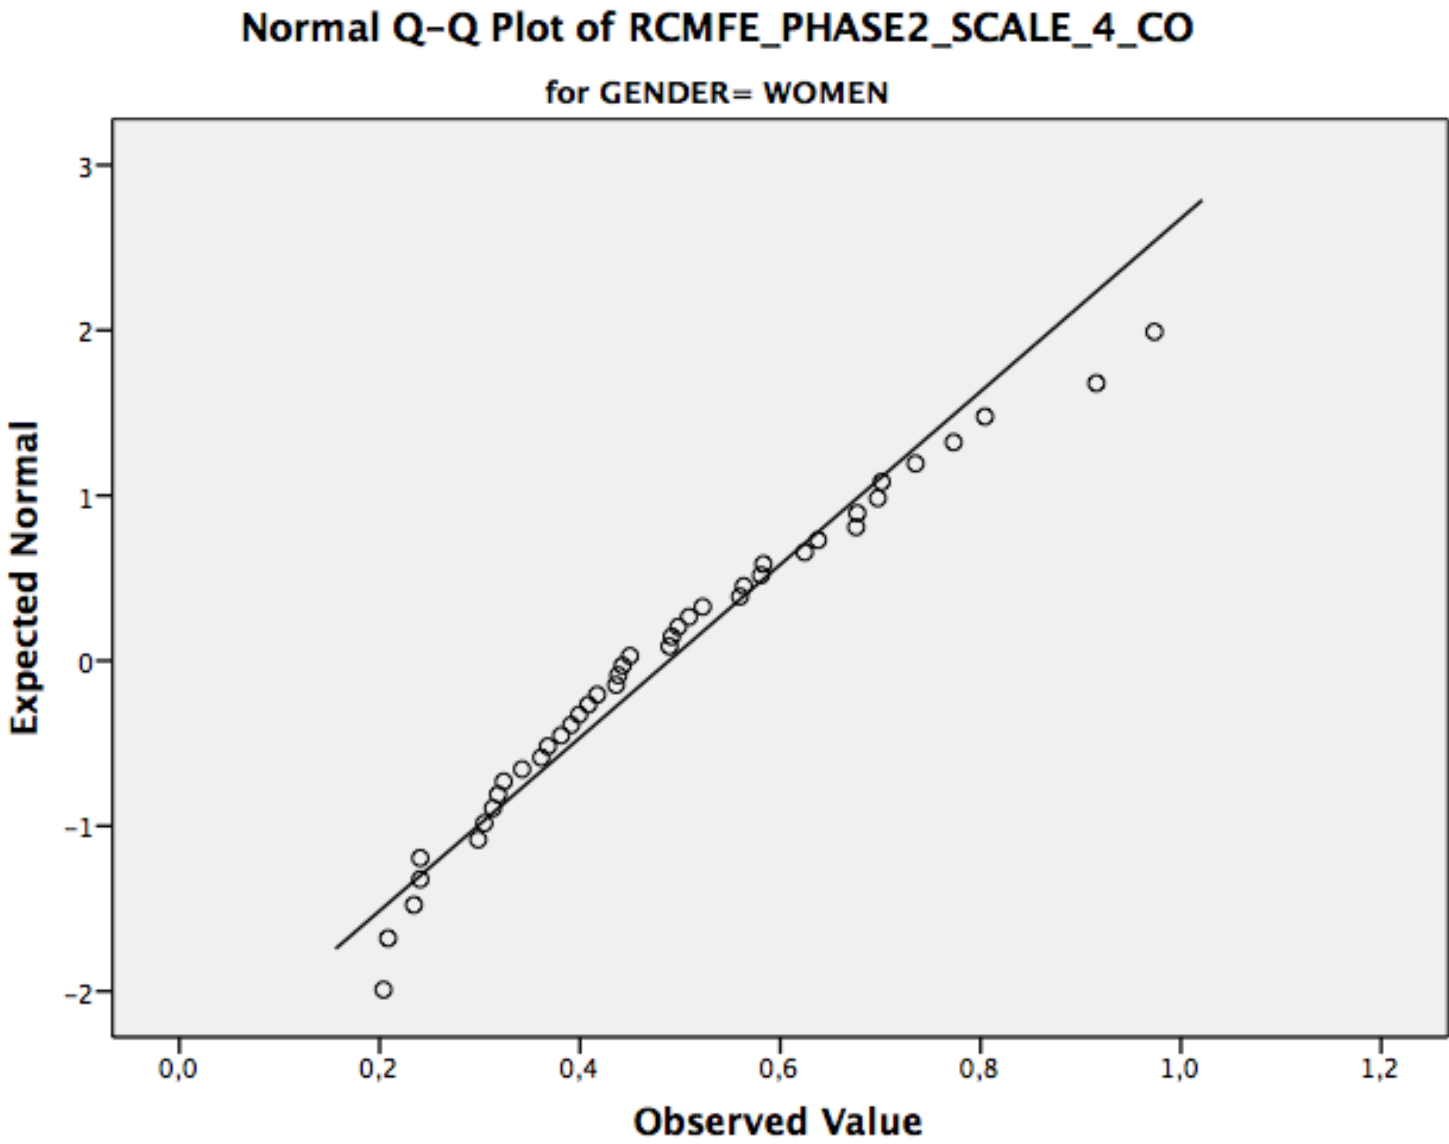



# Normal Q-Q Plot of RCMFE\_PHASE2\_SCALE\_4\_CO

for GENDER= MEN

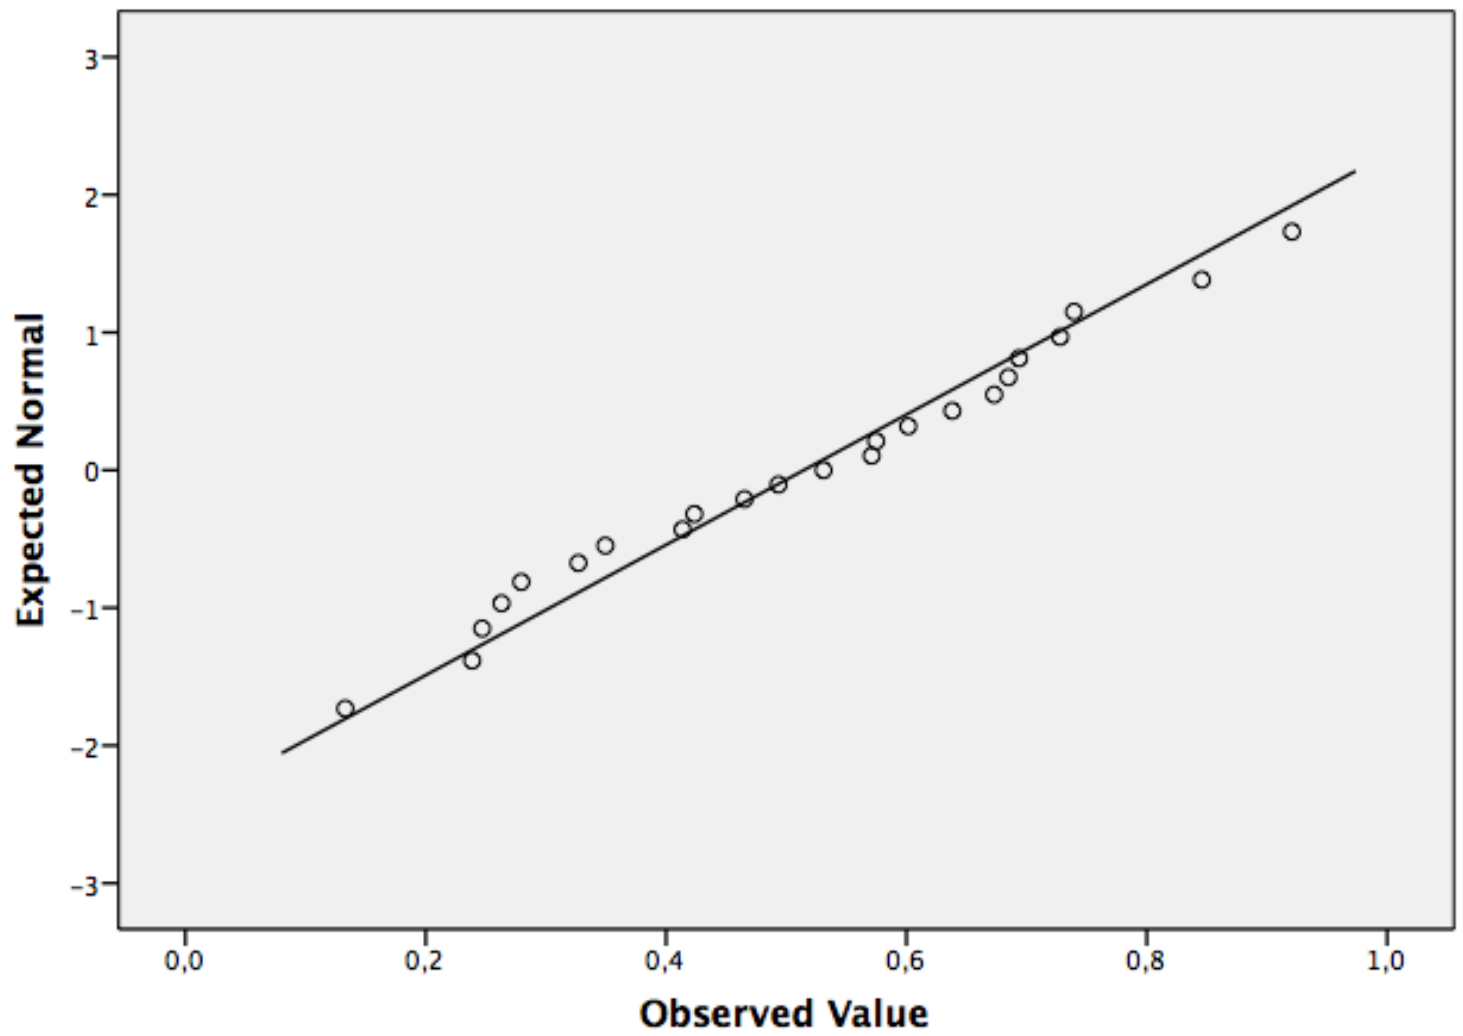

Normal Q-Q Plots

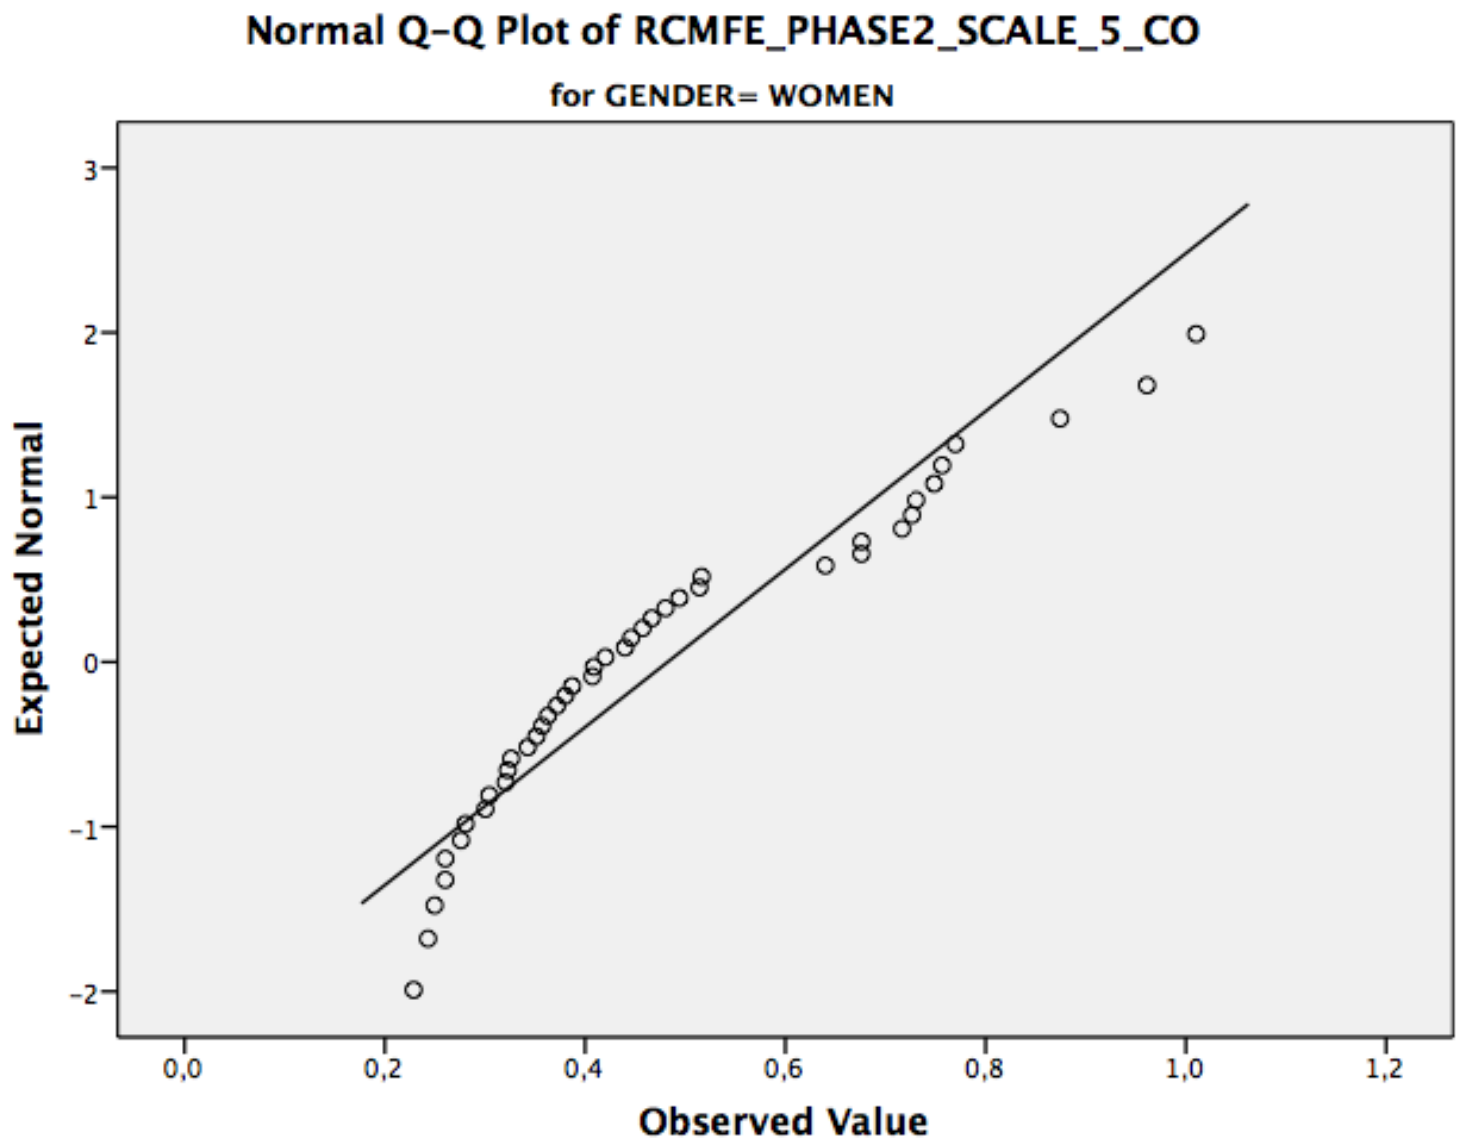

# Normal Q-Q Plot of RCMFE\_PHASE2\_SCALE\_5\_CO

for GENDER= MEN

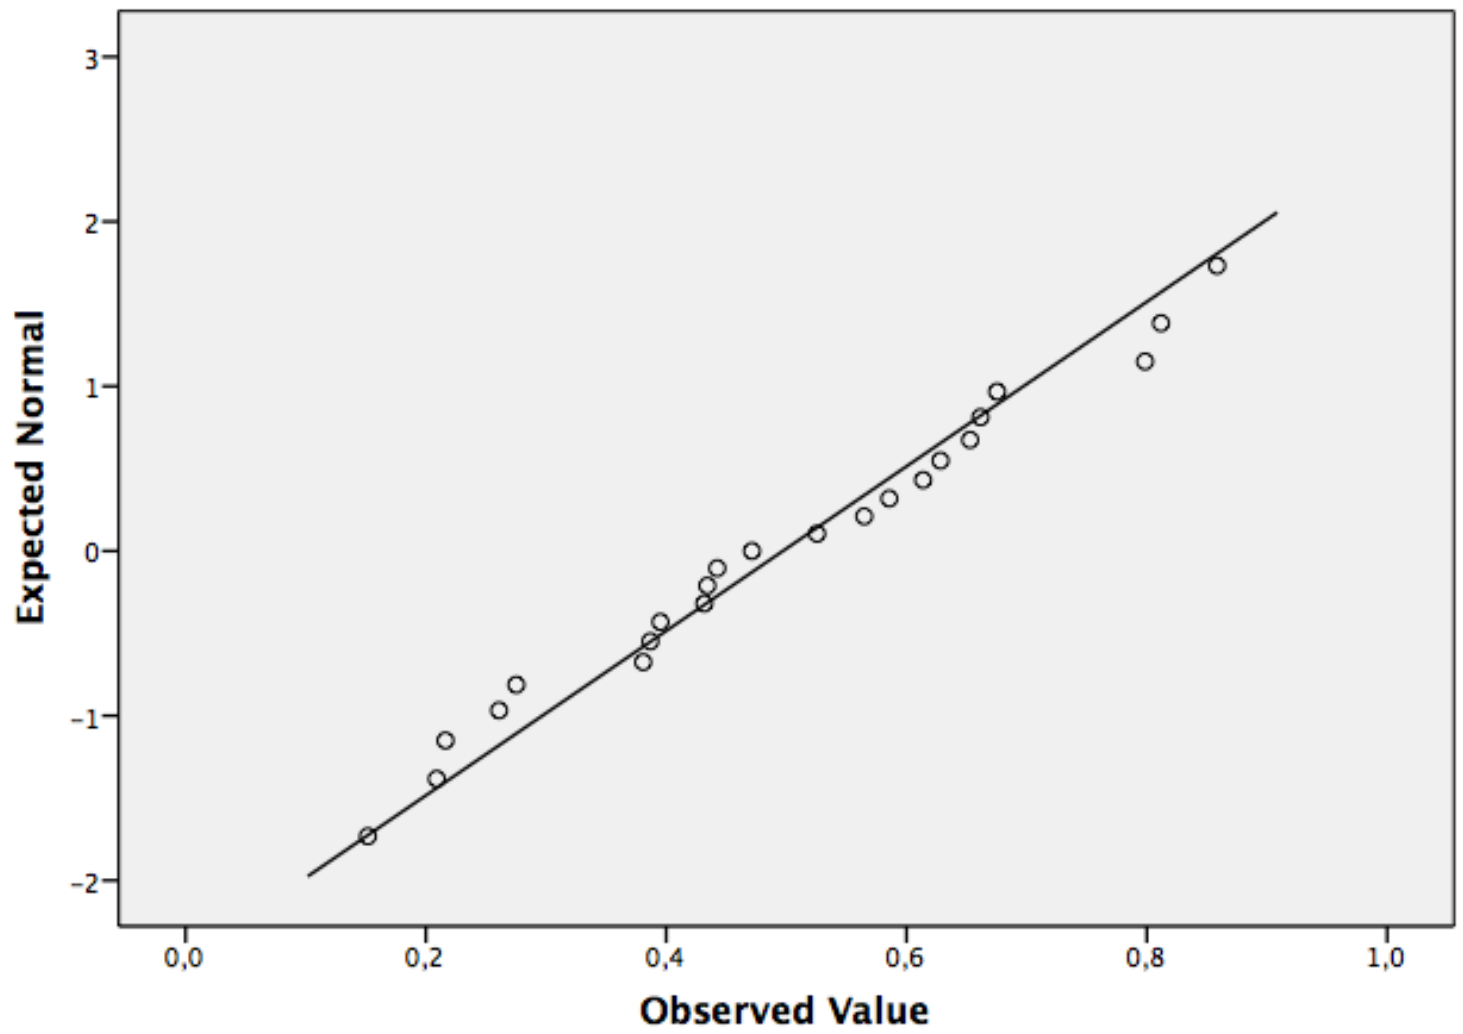

Normal Q-Q Plots

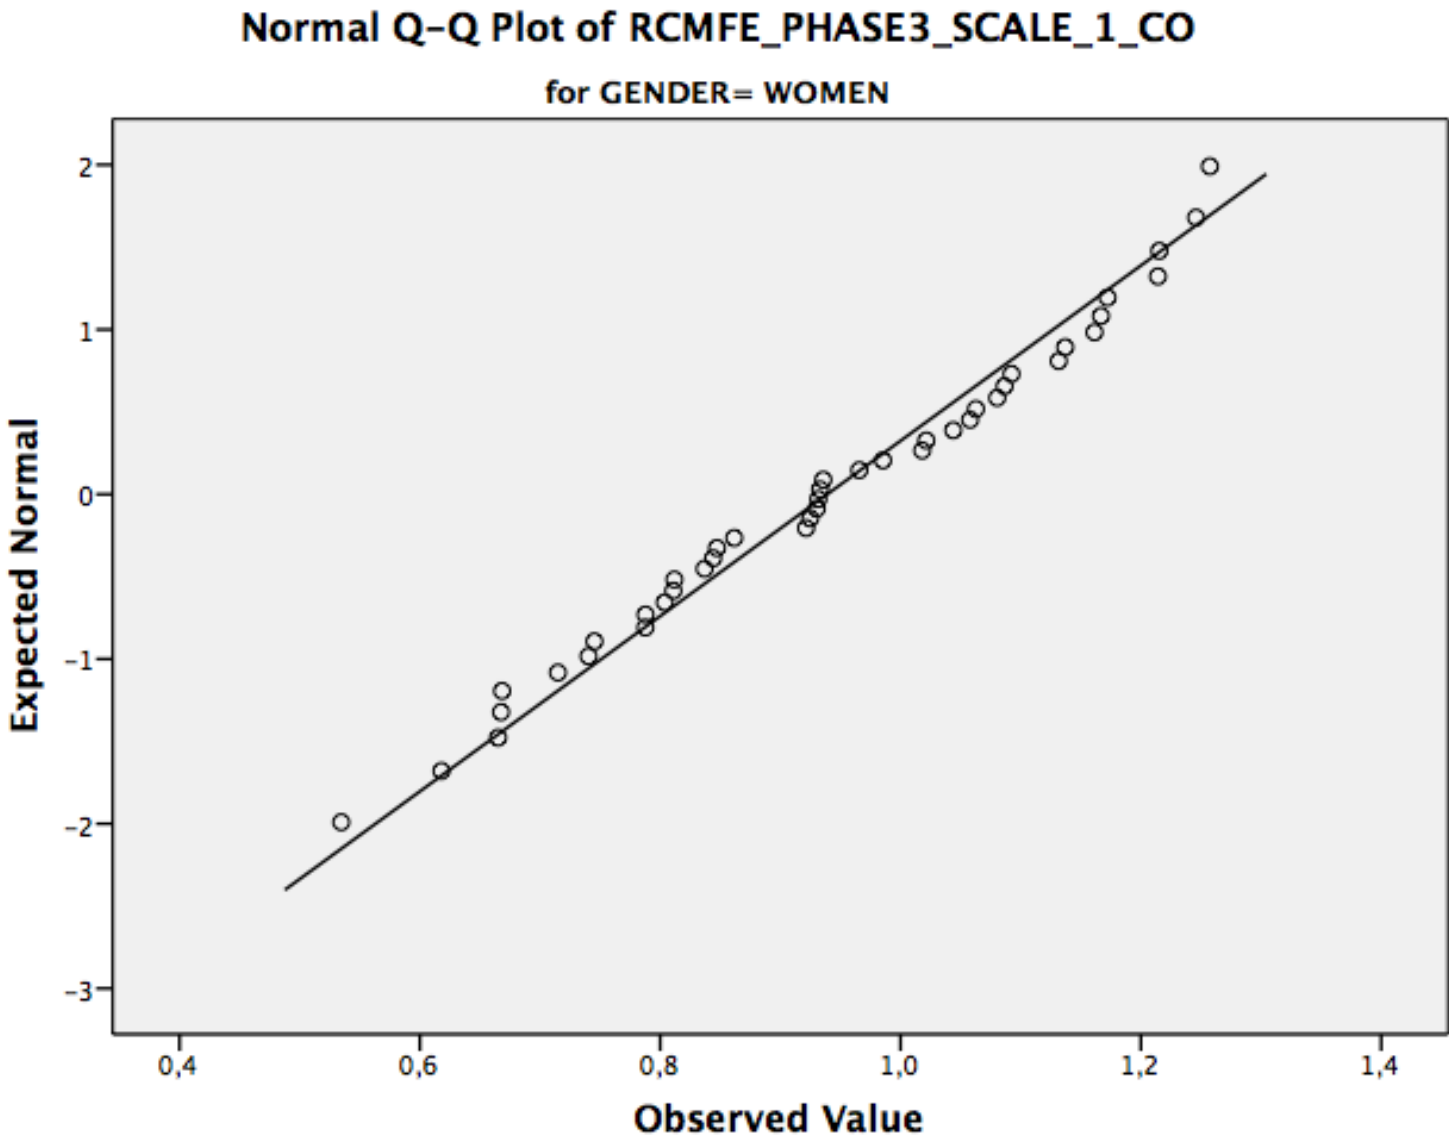

# Normal Q-Q Plot of RCMFE\_PHASE3\_SCALE\_1\_CO

for GENDER= MEN

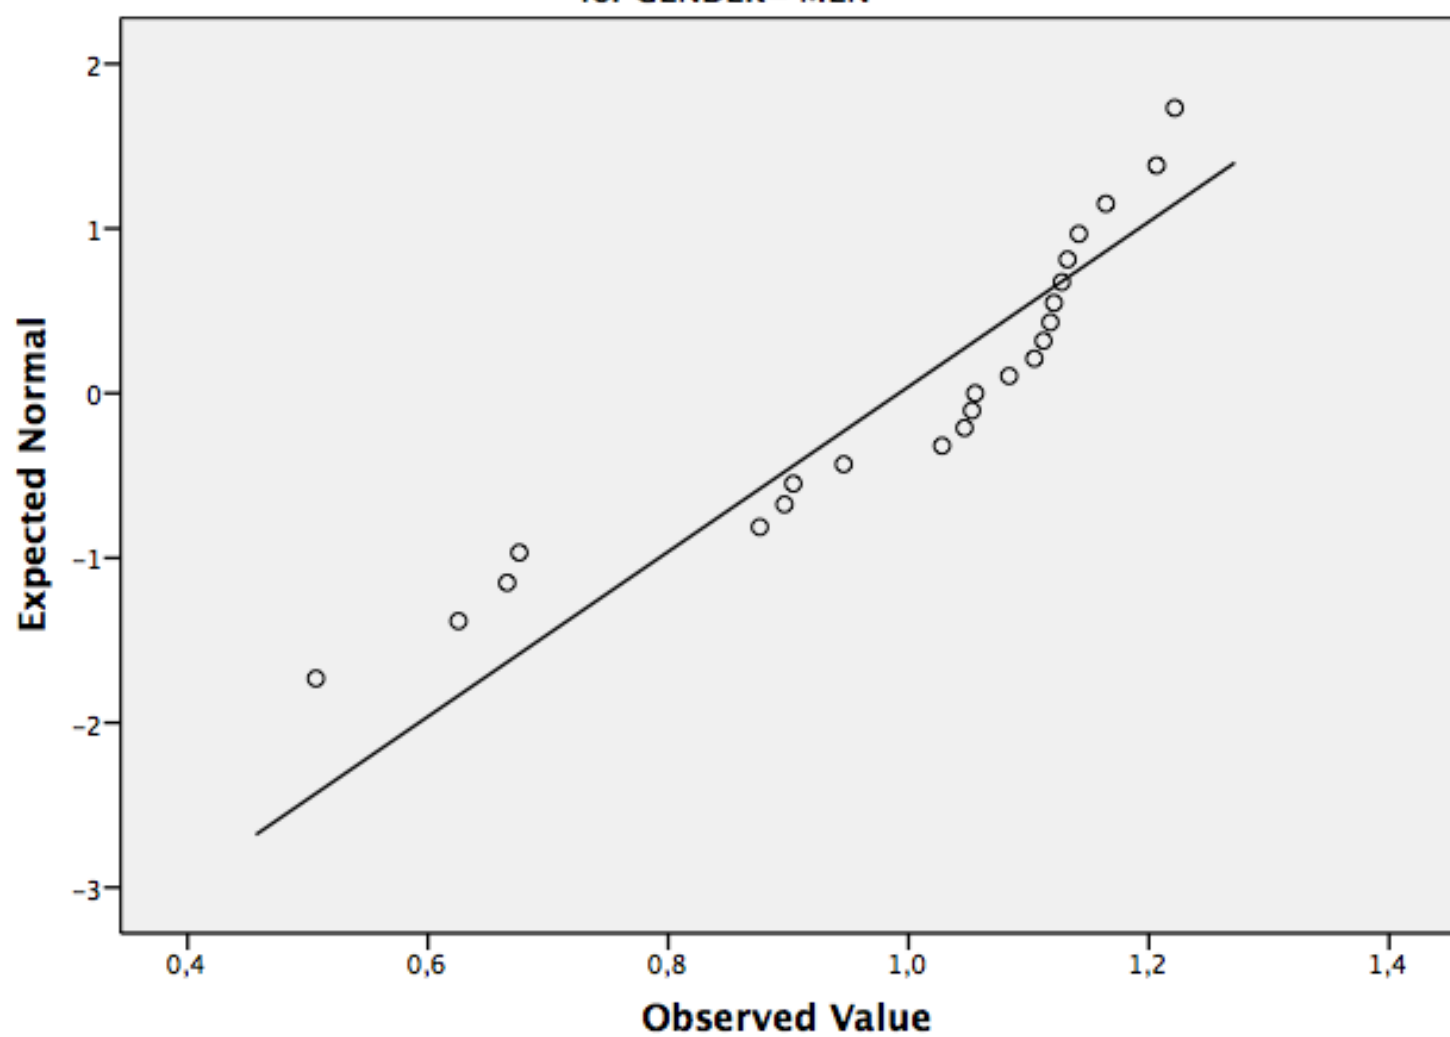

Normal Q-Q Plots

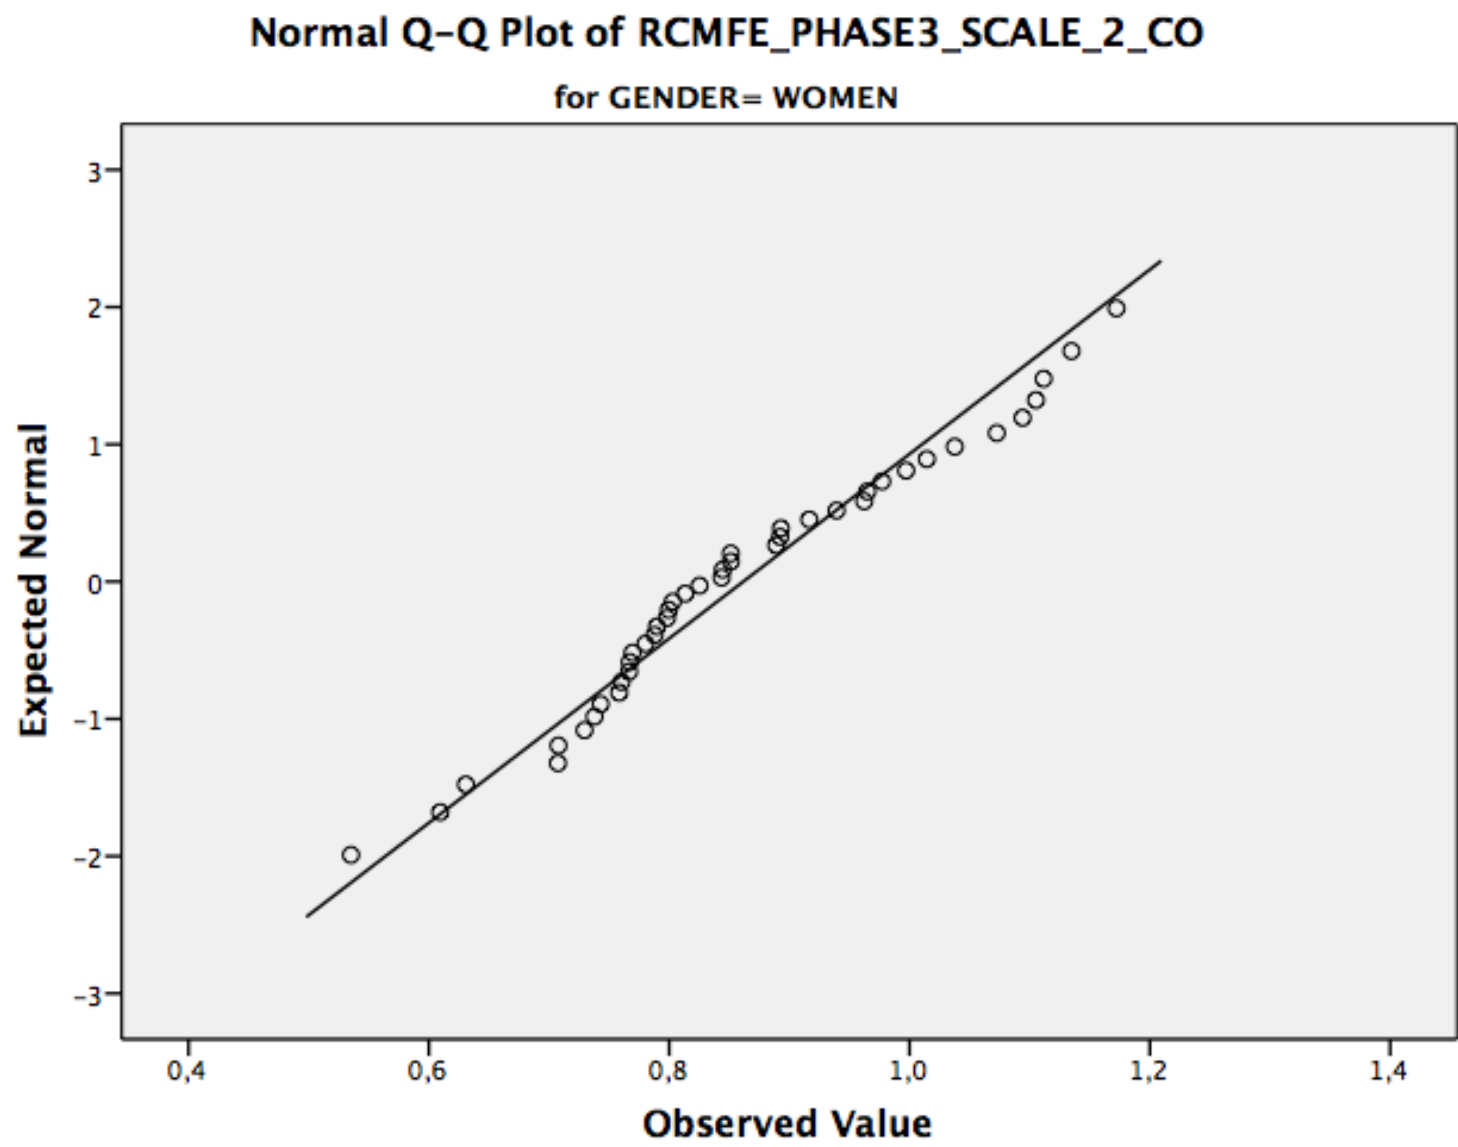

# Normal Q-Q Plot of RCMFE\_PHASE3\_SCALE\_2\_CO

for GENDER= MEN

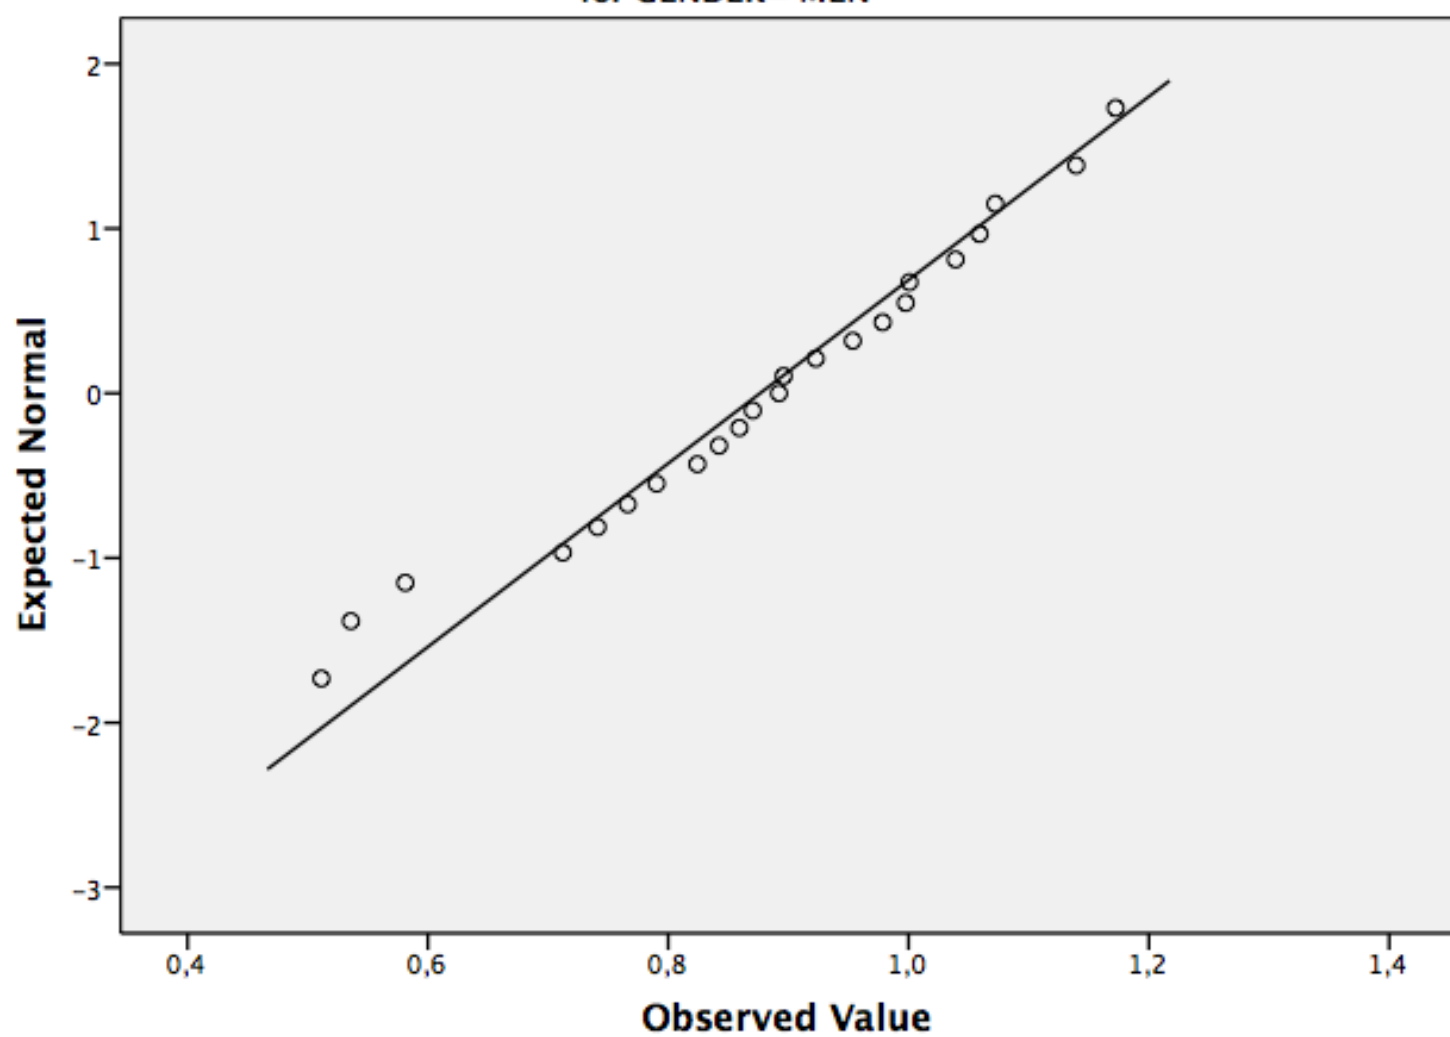

Normal Q-Q Plots

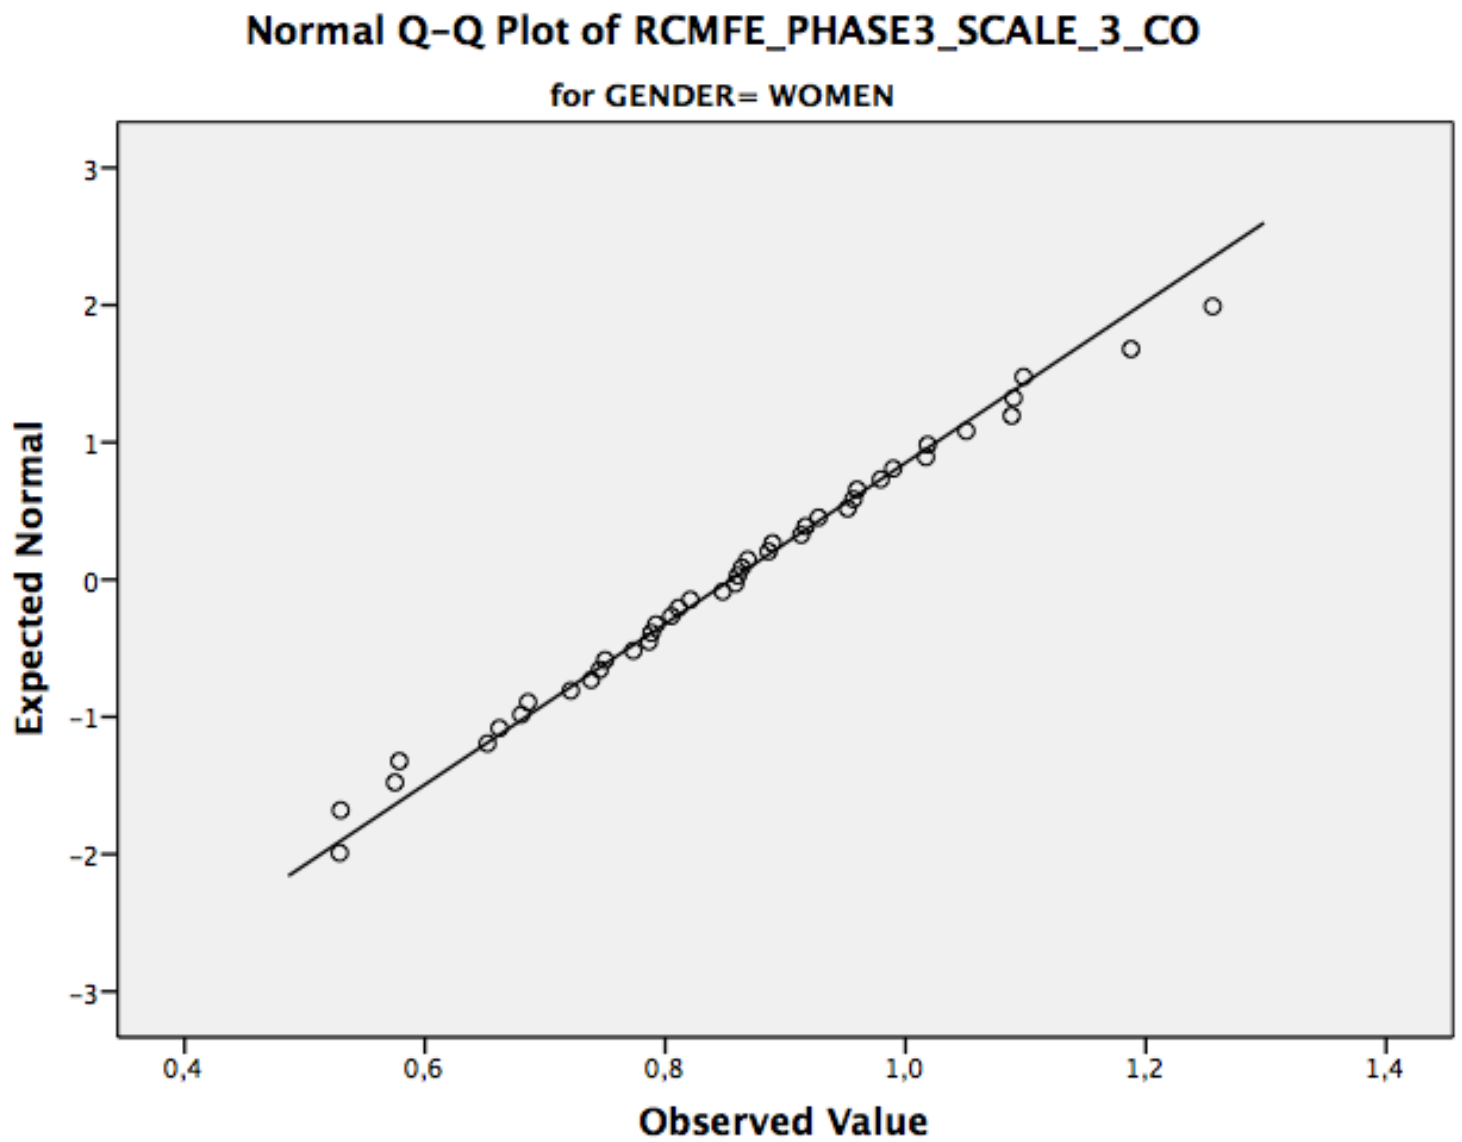



# Normal Q-Q Plot of RCMFE\_PHASE3\_SCALE\_3\_CO

for GENDER= MEN

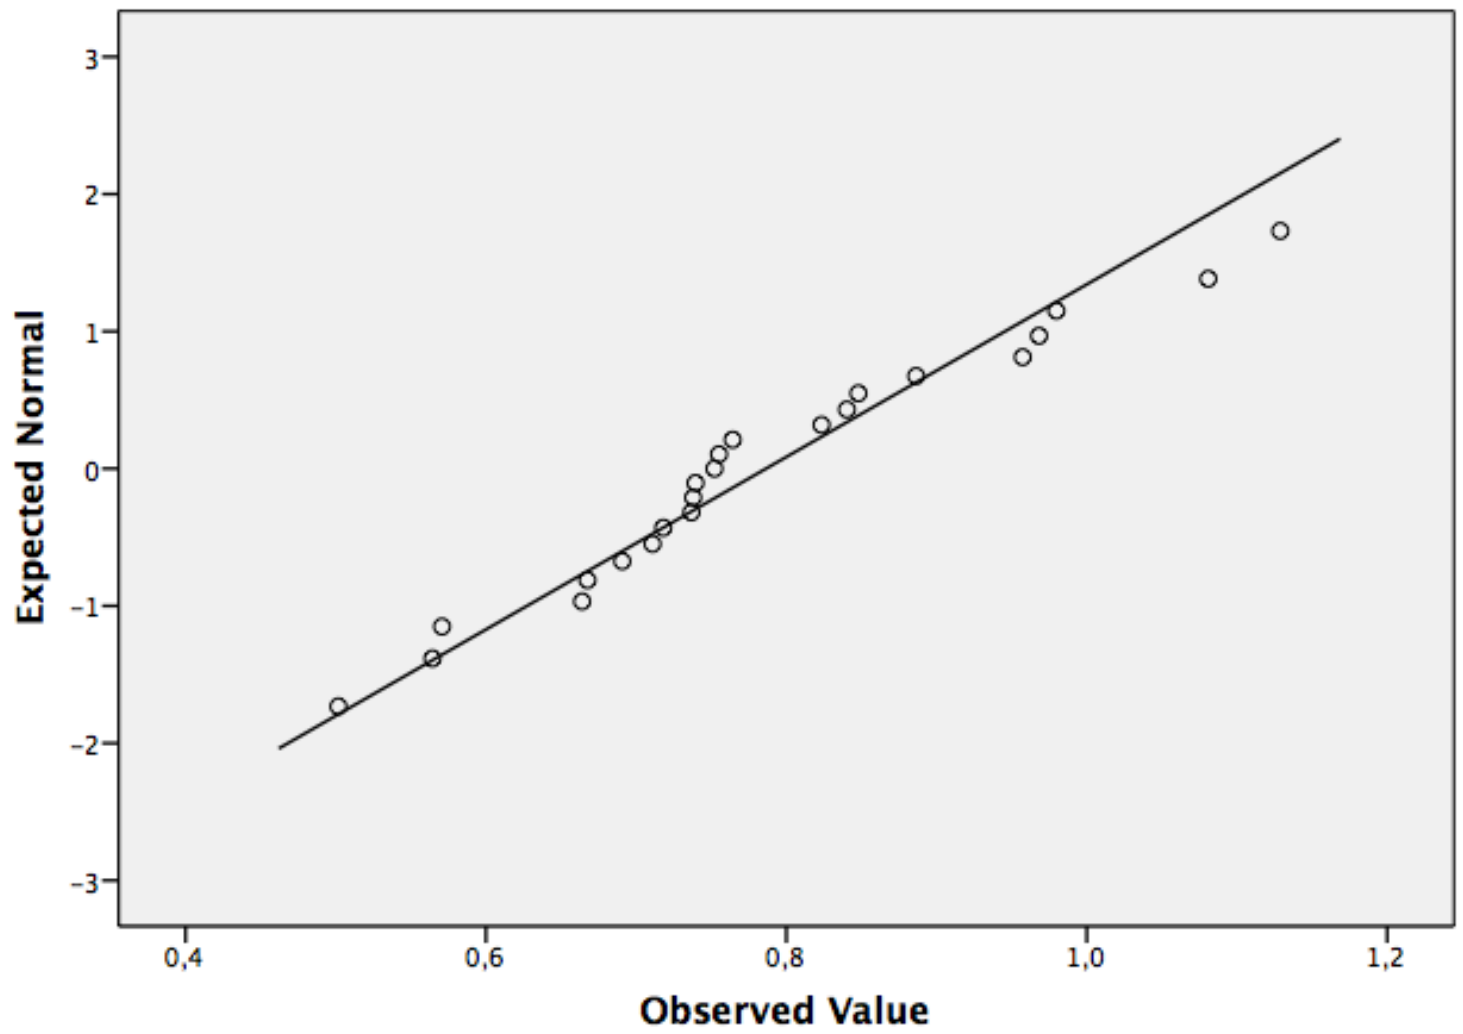

Normal Q-Q Plots

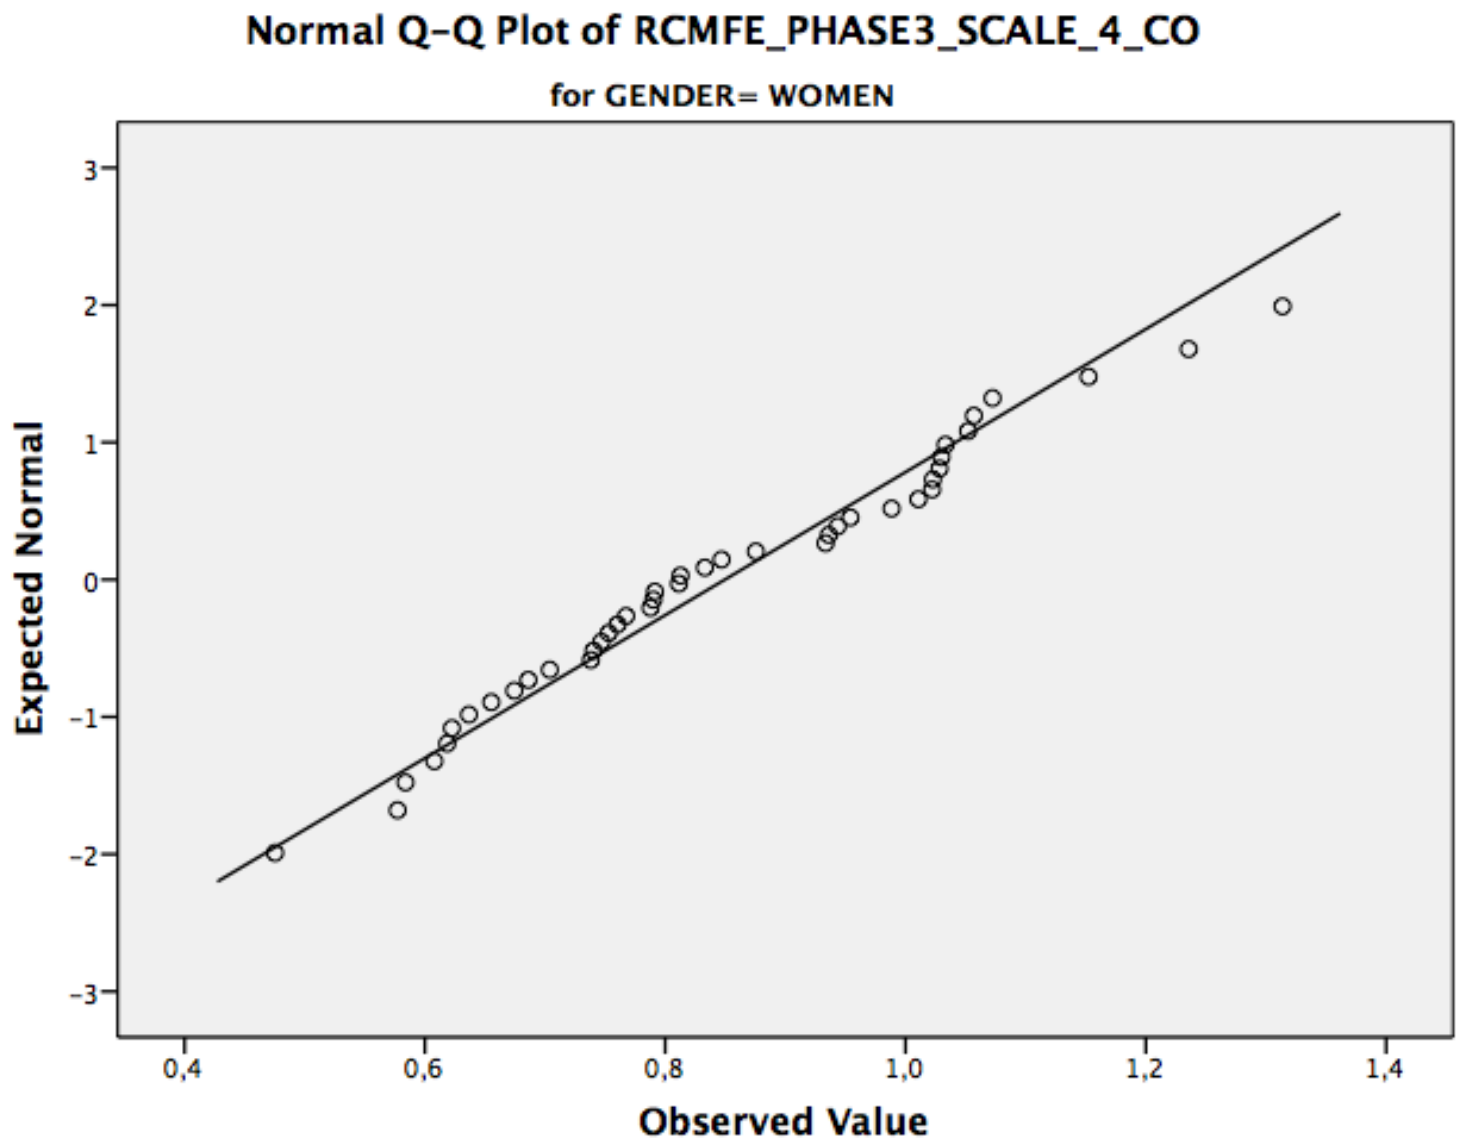

# Normal Q-Q Plot of RCMFE\_PHASE3\_SCALE\_4\_CO

for GENDER= MEN

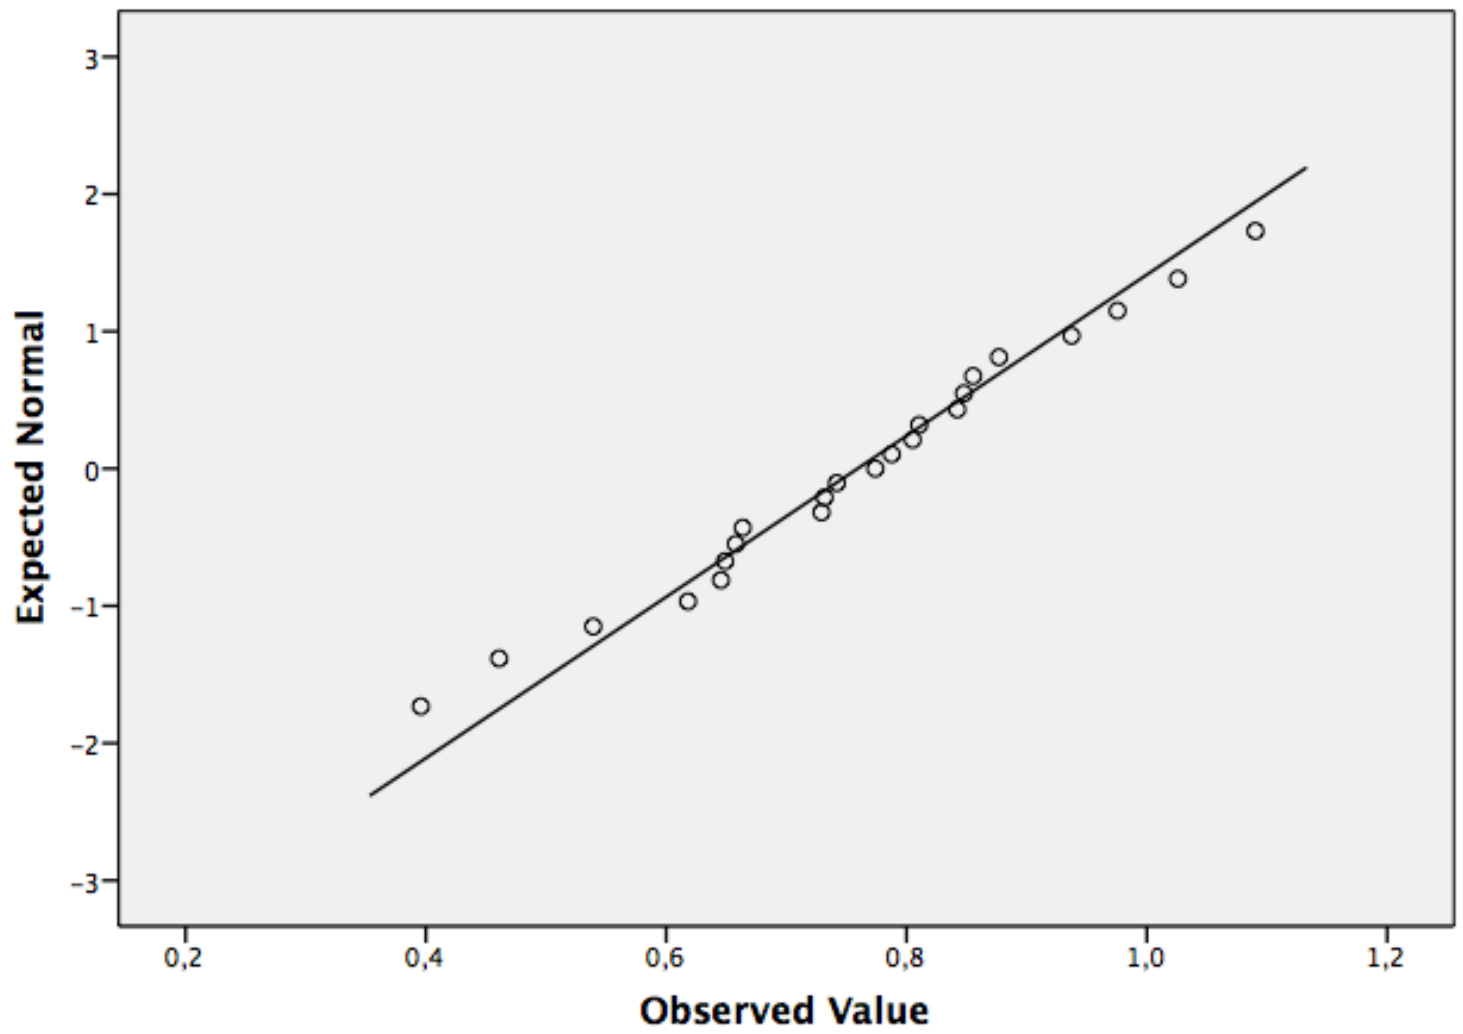

Normal Q-Q Plots

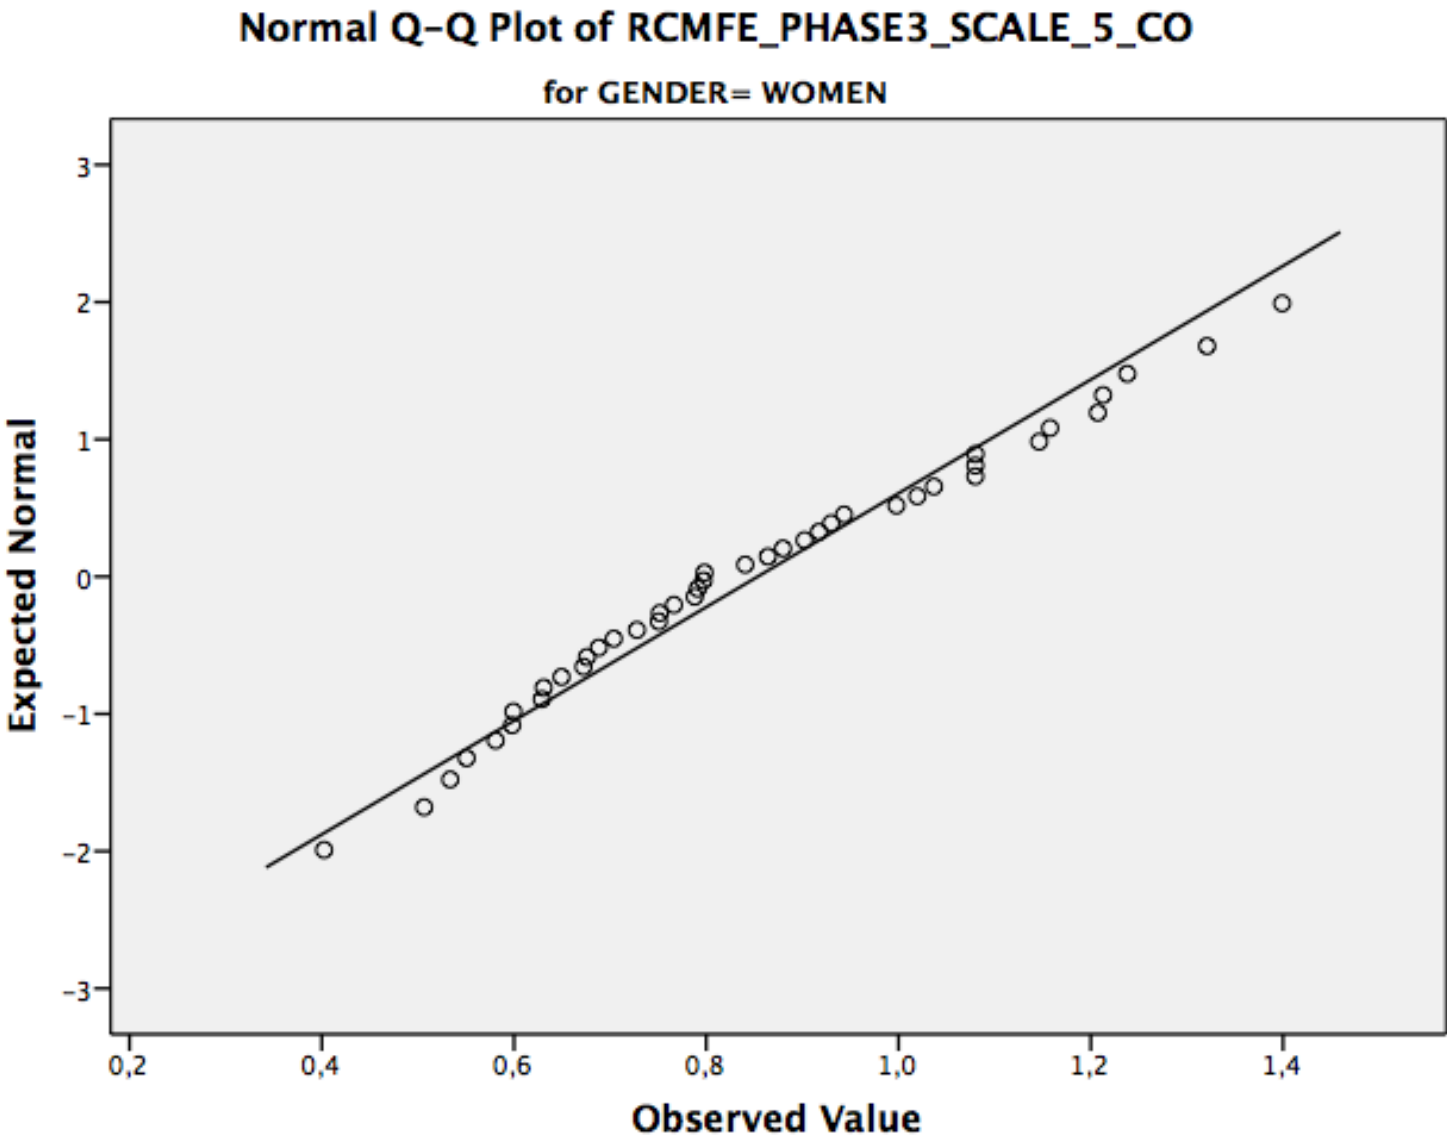

# Normal Q-Q Plot of RCMFE\_PHASE3\_SCALE\_5\_CO

for GENDER= MEN

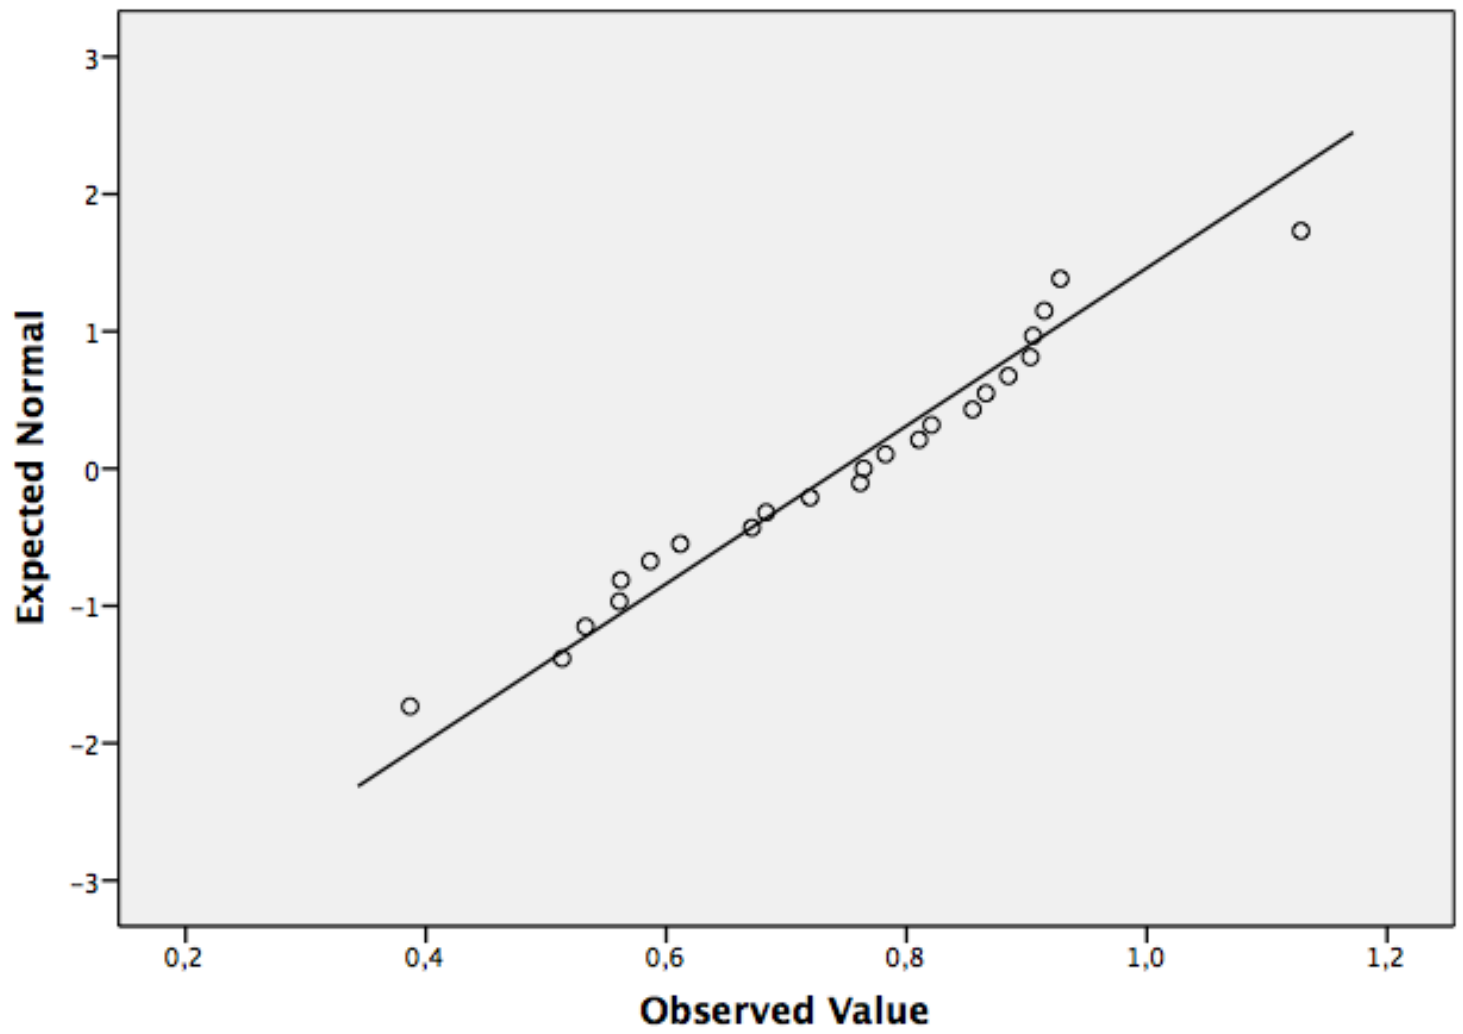

Normal Q-Q Plots

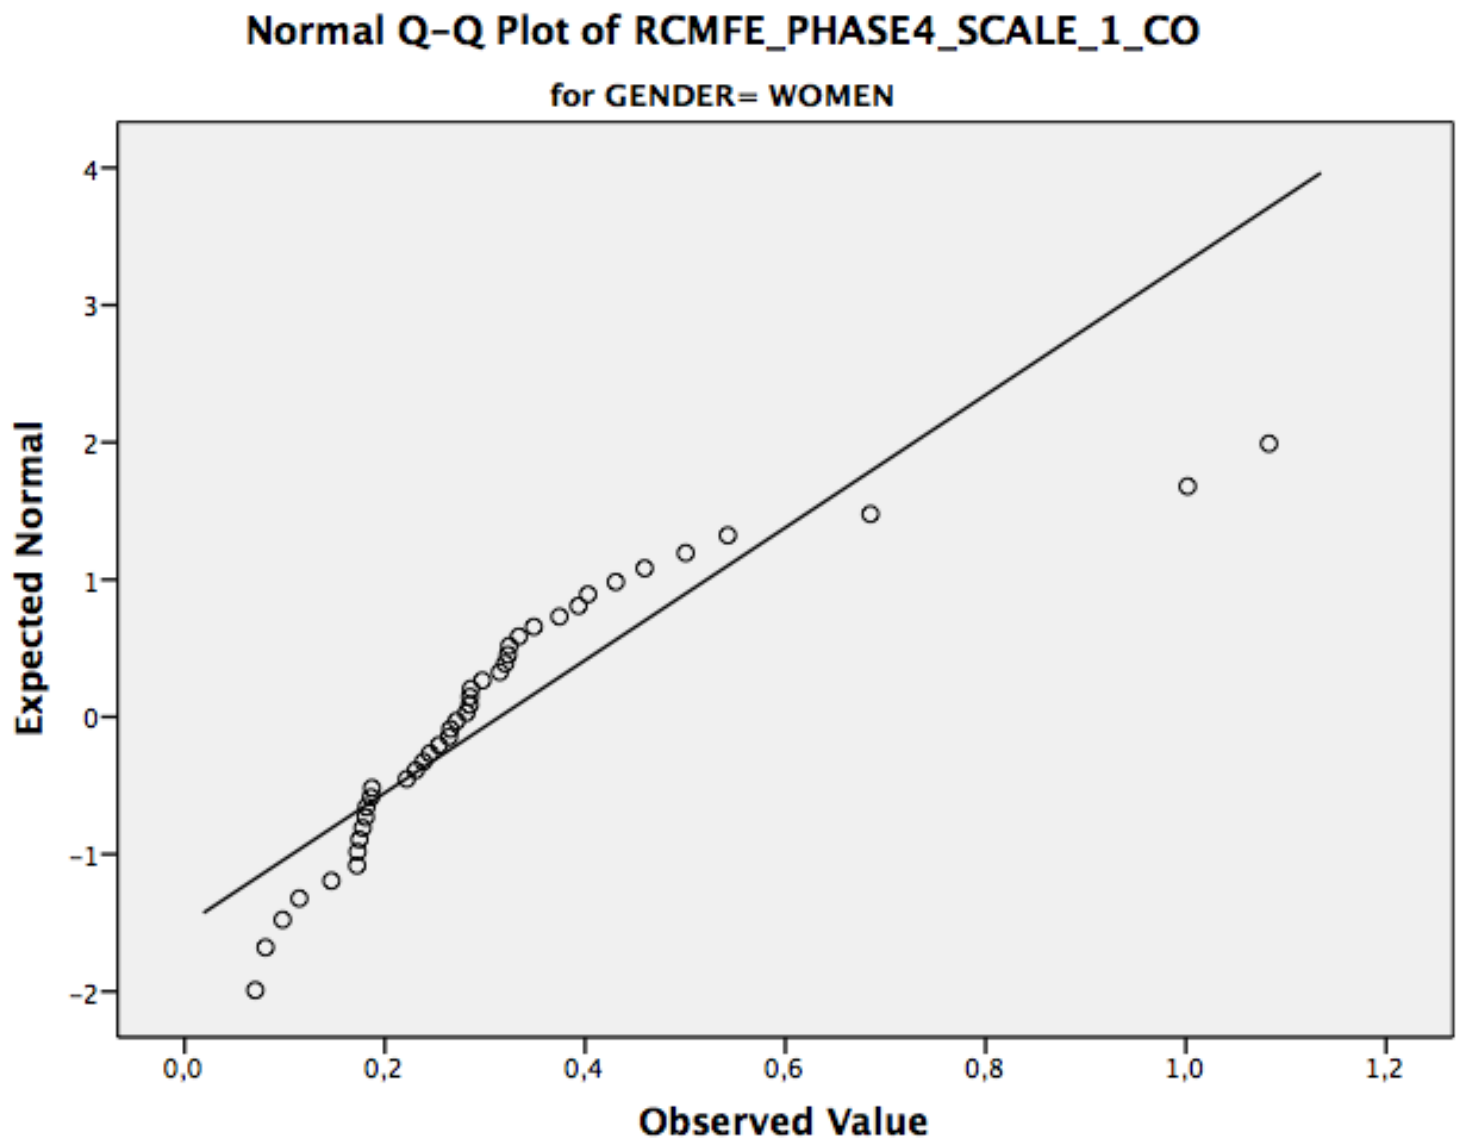

# Normal Q-Q Plot of RCMFE\_PHASE4\_SCALE\_1\_CO

for GENDER= MEN

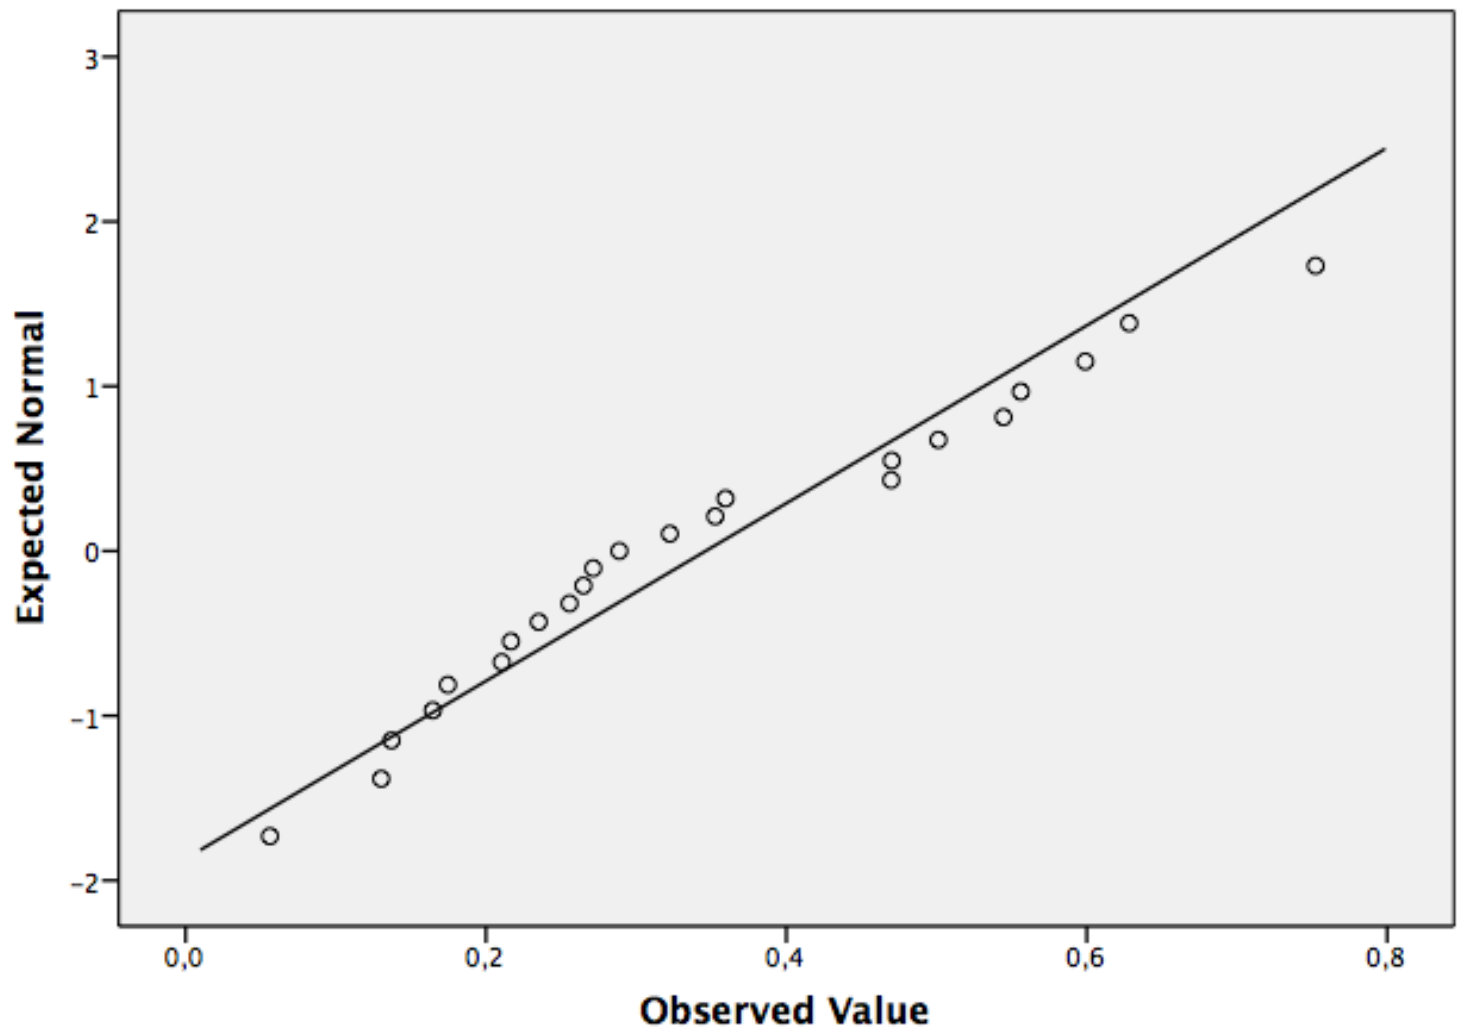

Normal Q-Q Plots

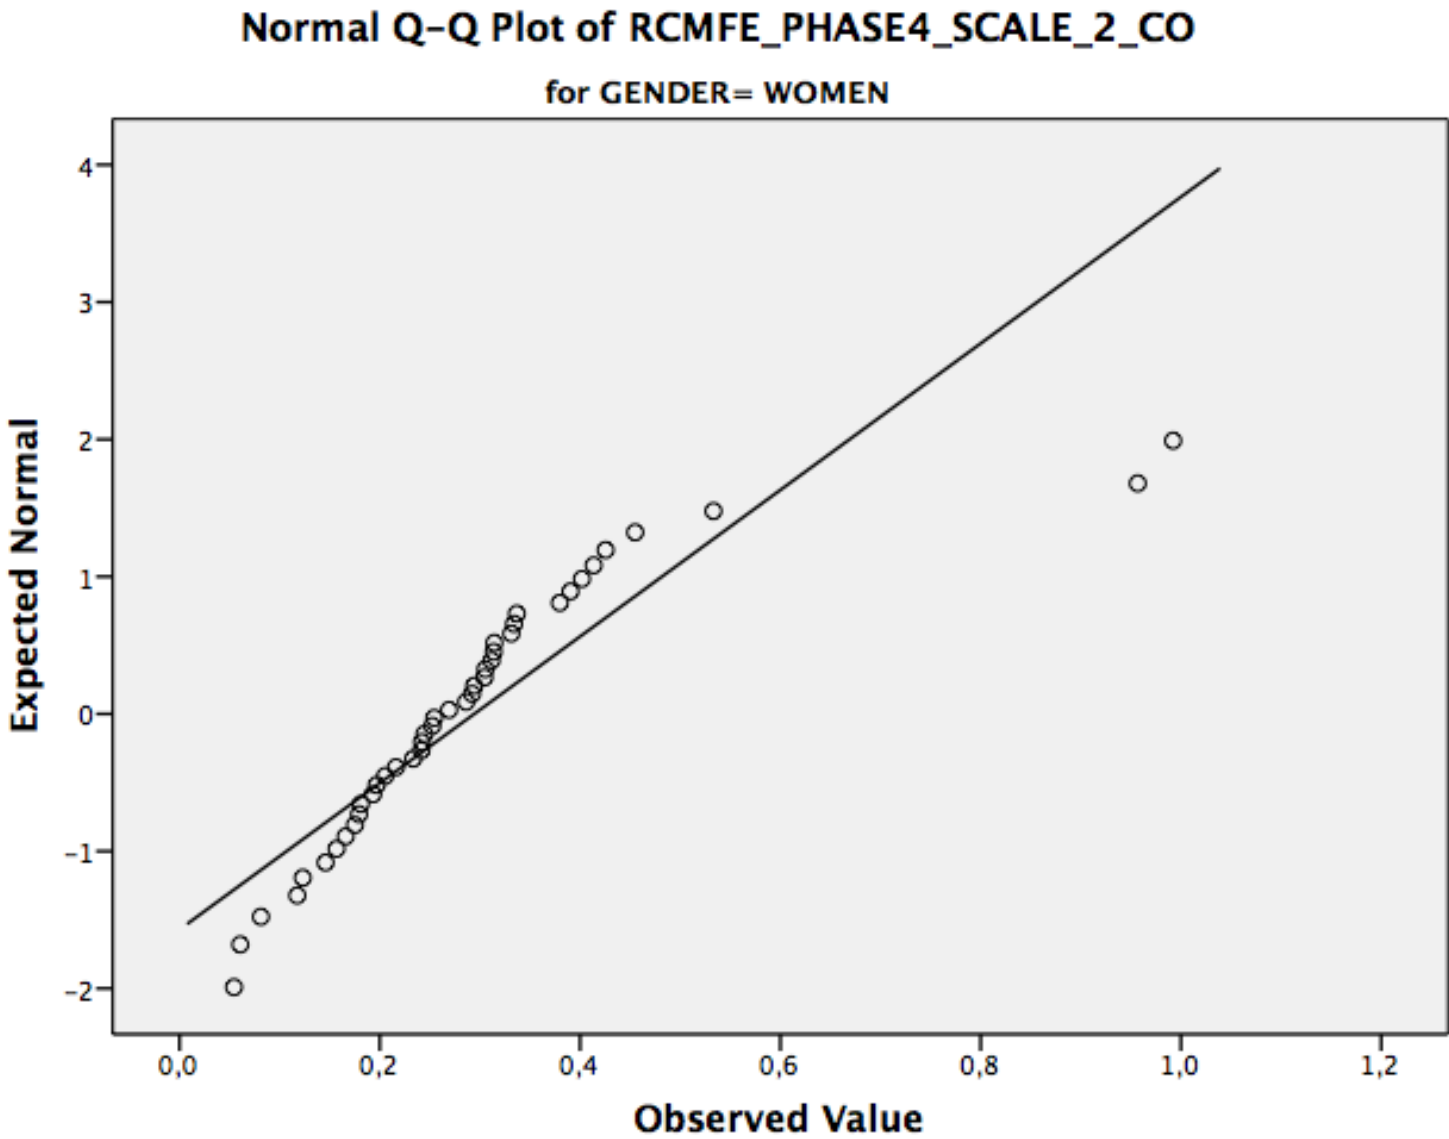



# Normal Q-Q Plot of RCMFE\_PHASE4\_SCALE\_2\_CO

for GENDER= MEN

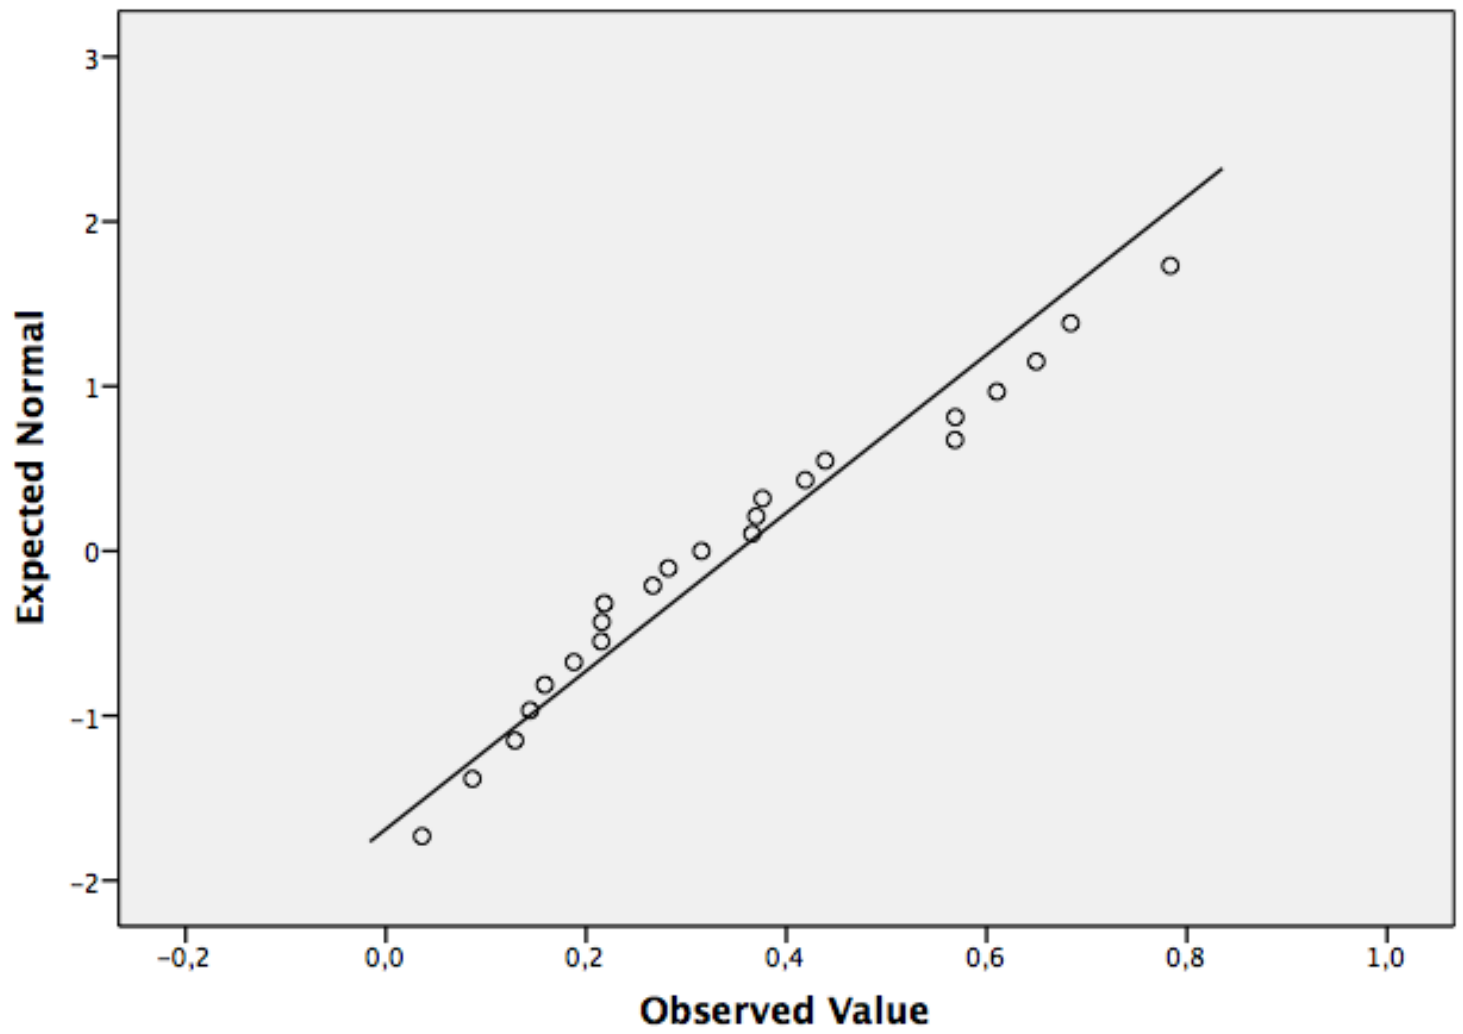

Normal Q-Q Plots

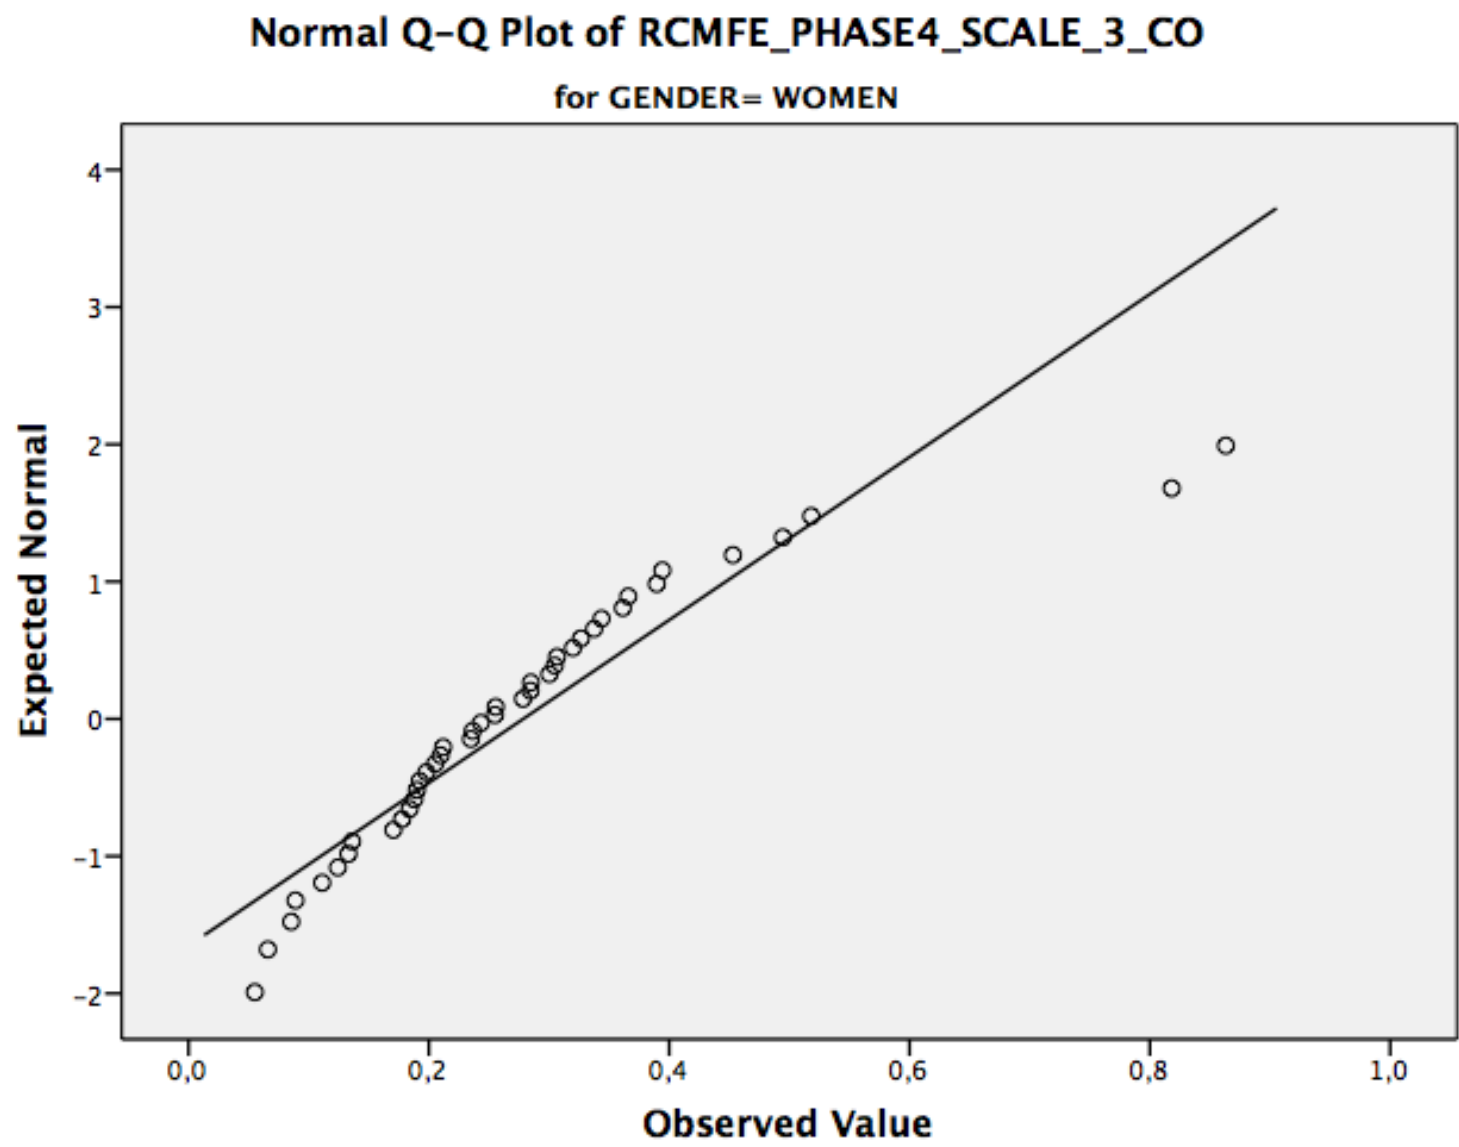

# Normal Q-Q Plot of RCMFE\_PHASE4\_SCALE\_3\_CO

for GENDER= MEN

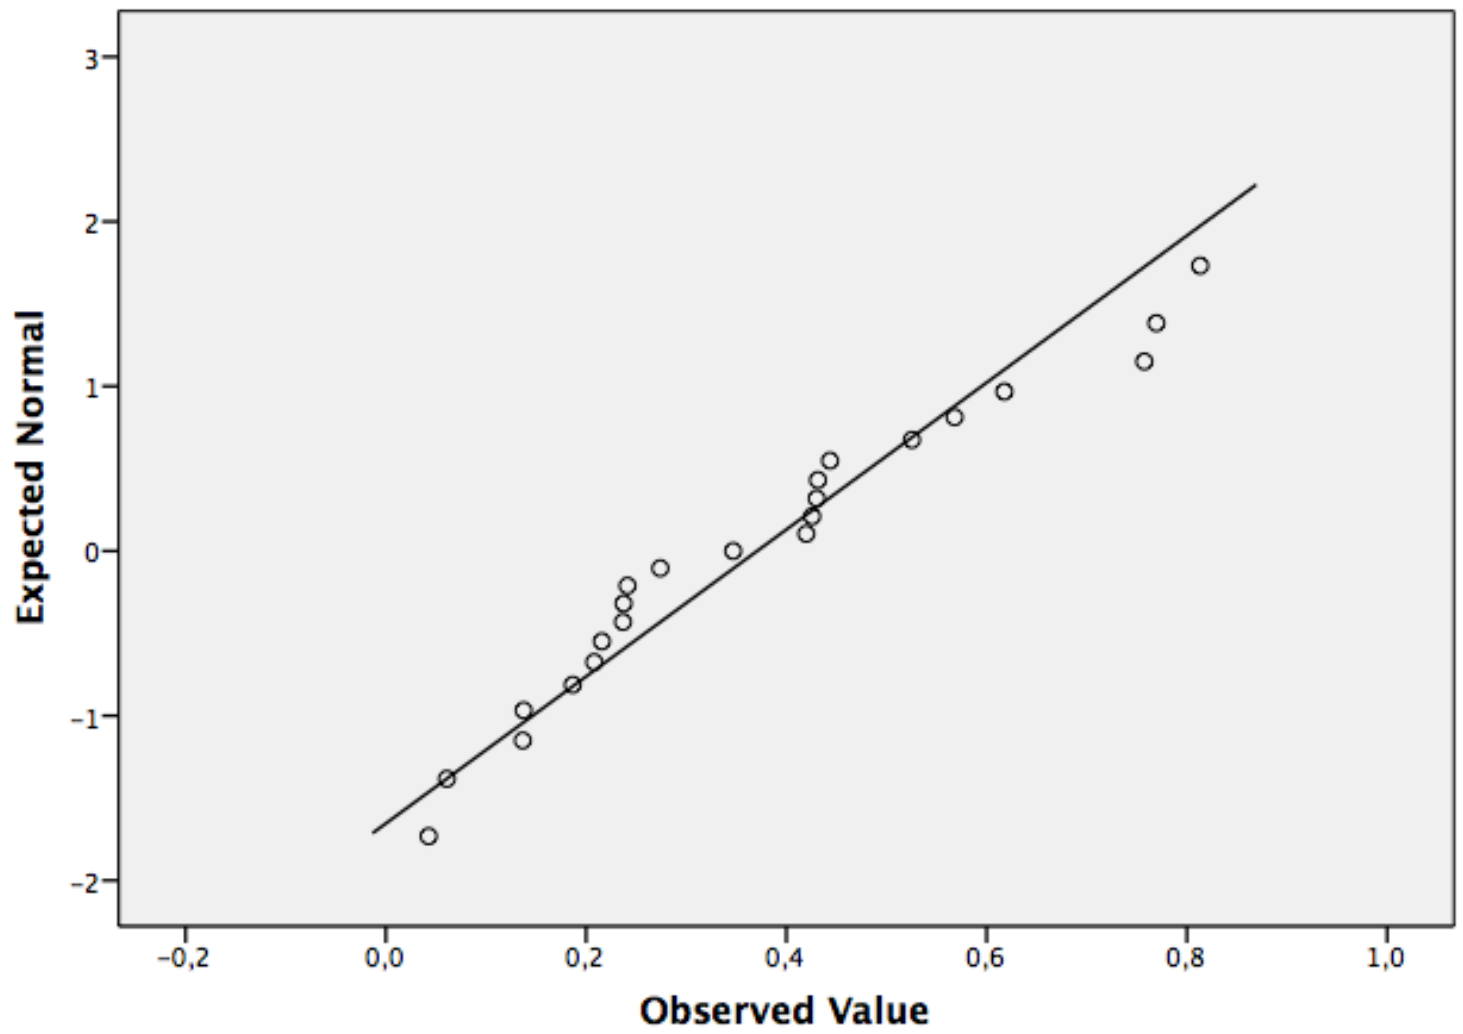

Normal Q-Q Plots

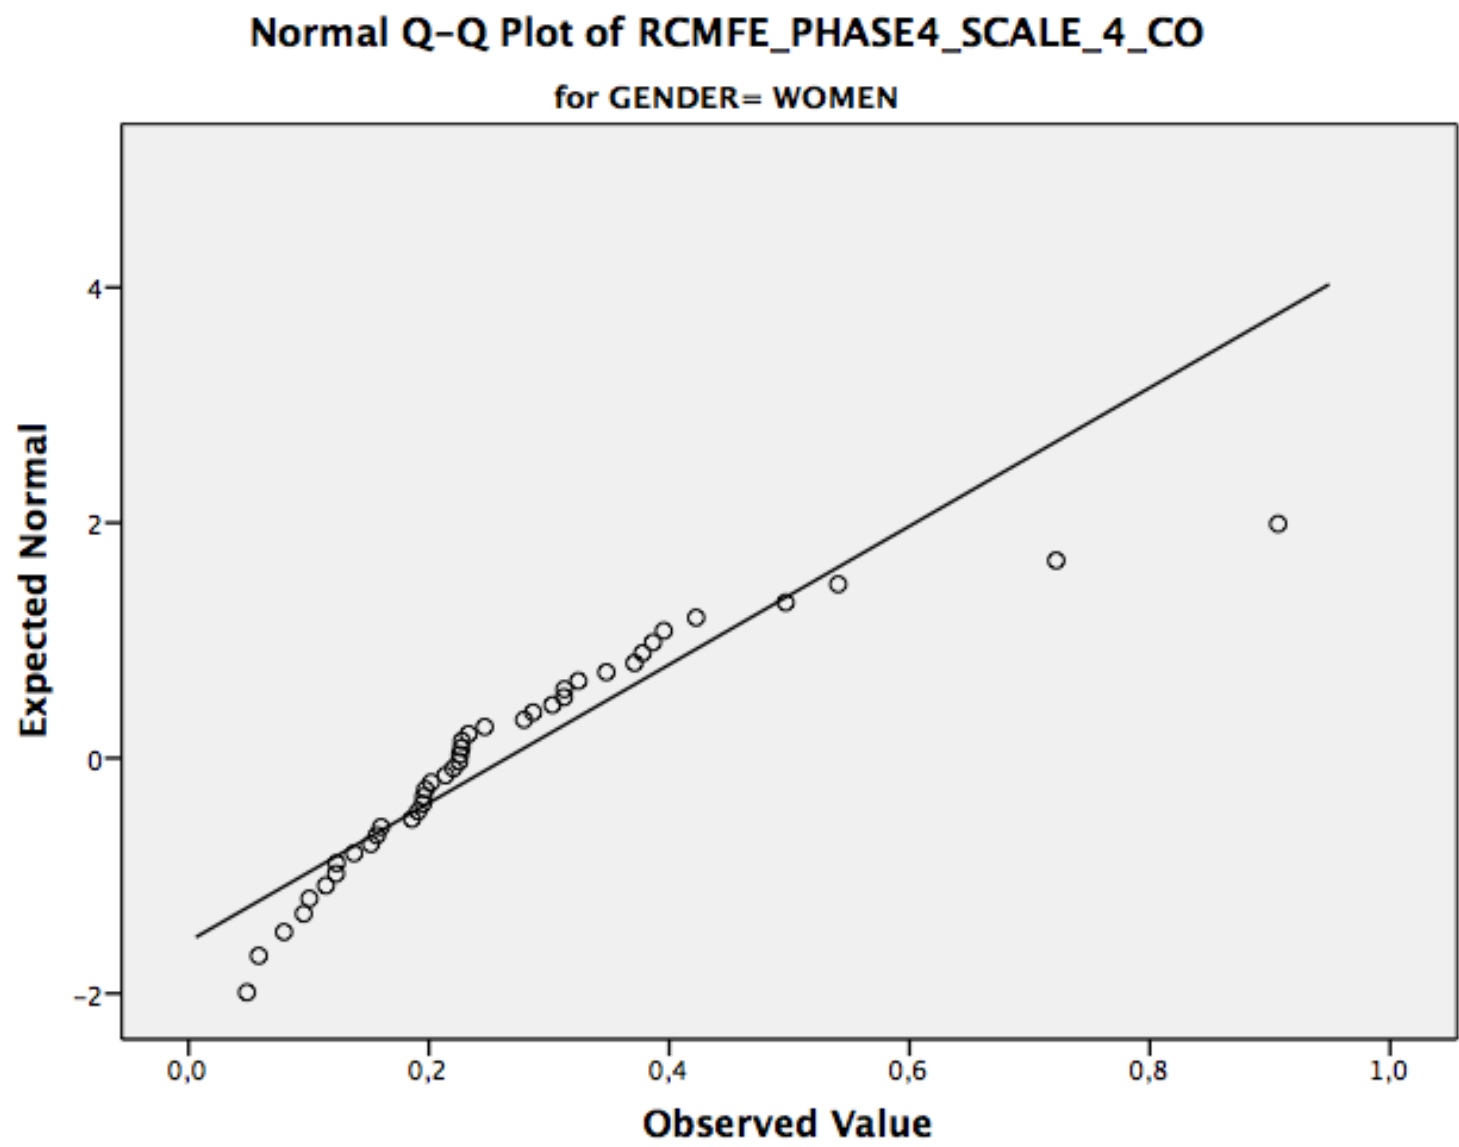

# Normal Q-Q Plot of RCMFE\_PHASE4\_SCALE\_4\_CO

for GENDER= MEN

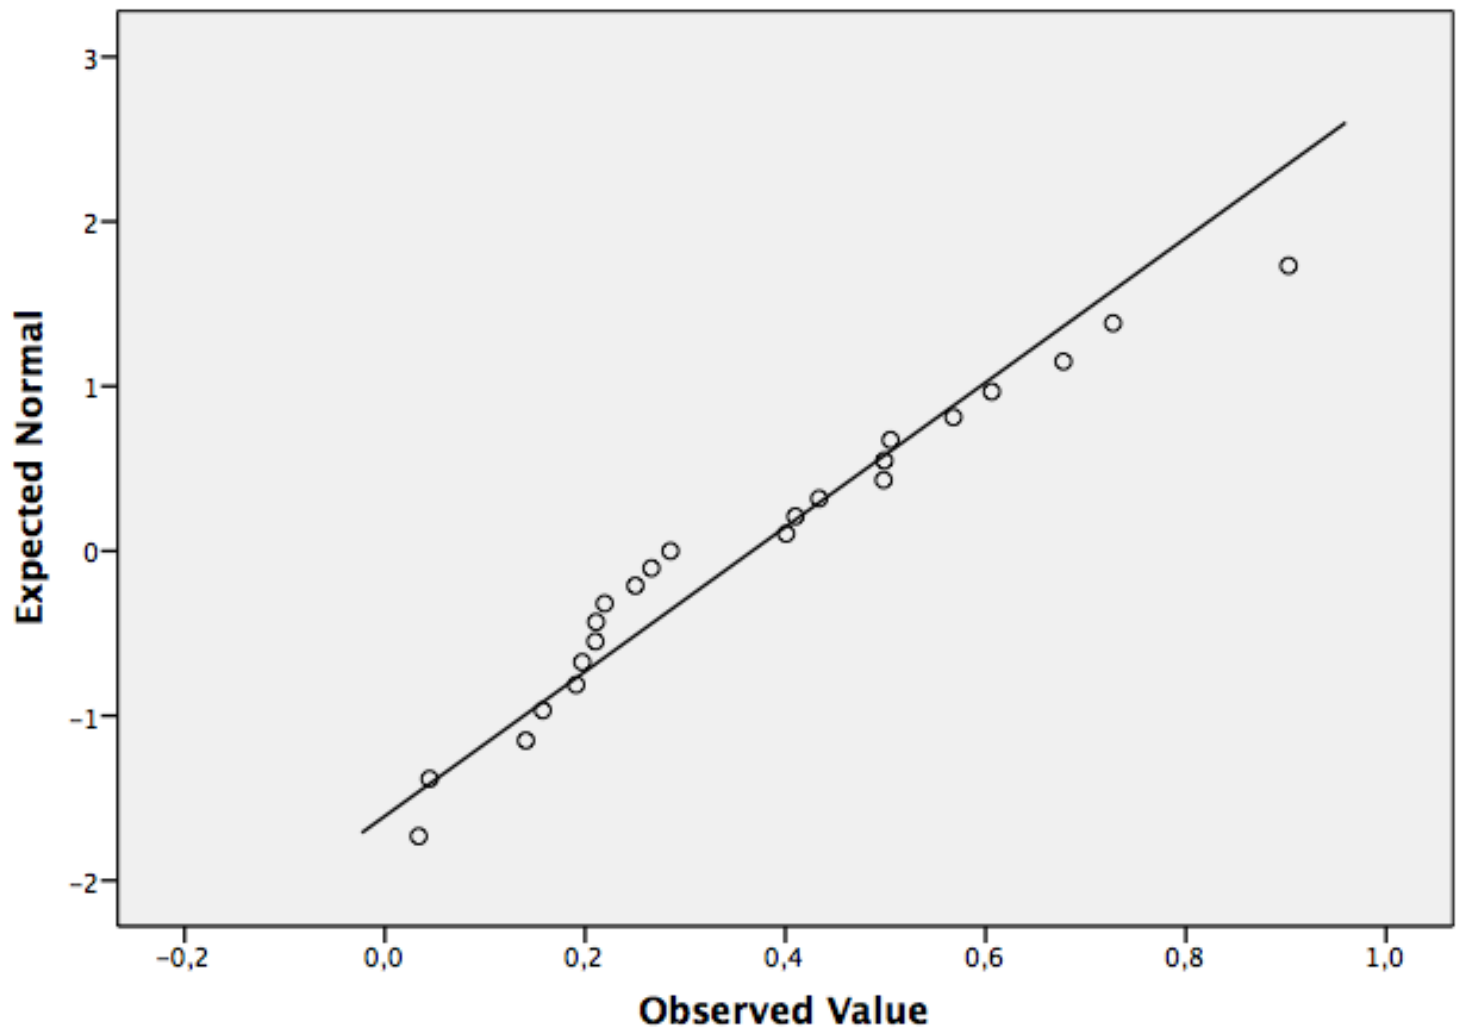

Normal Q-Q Plots

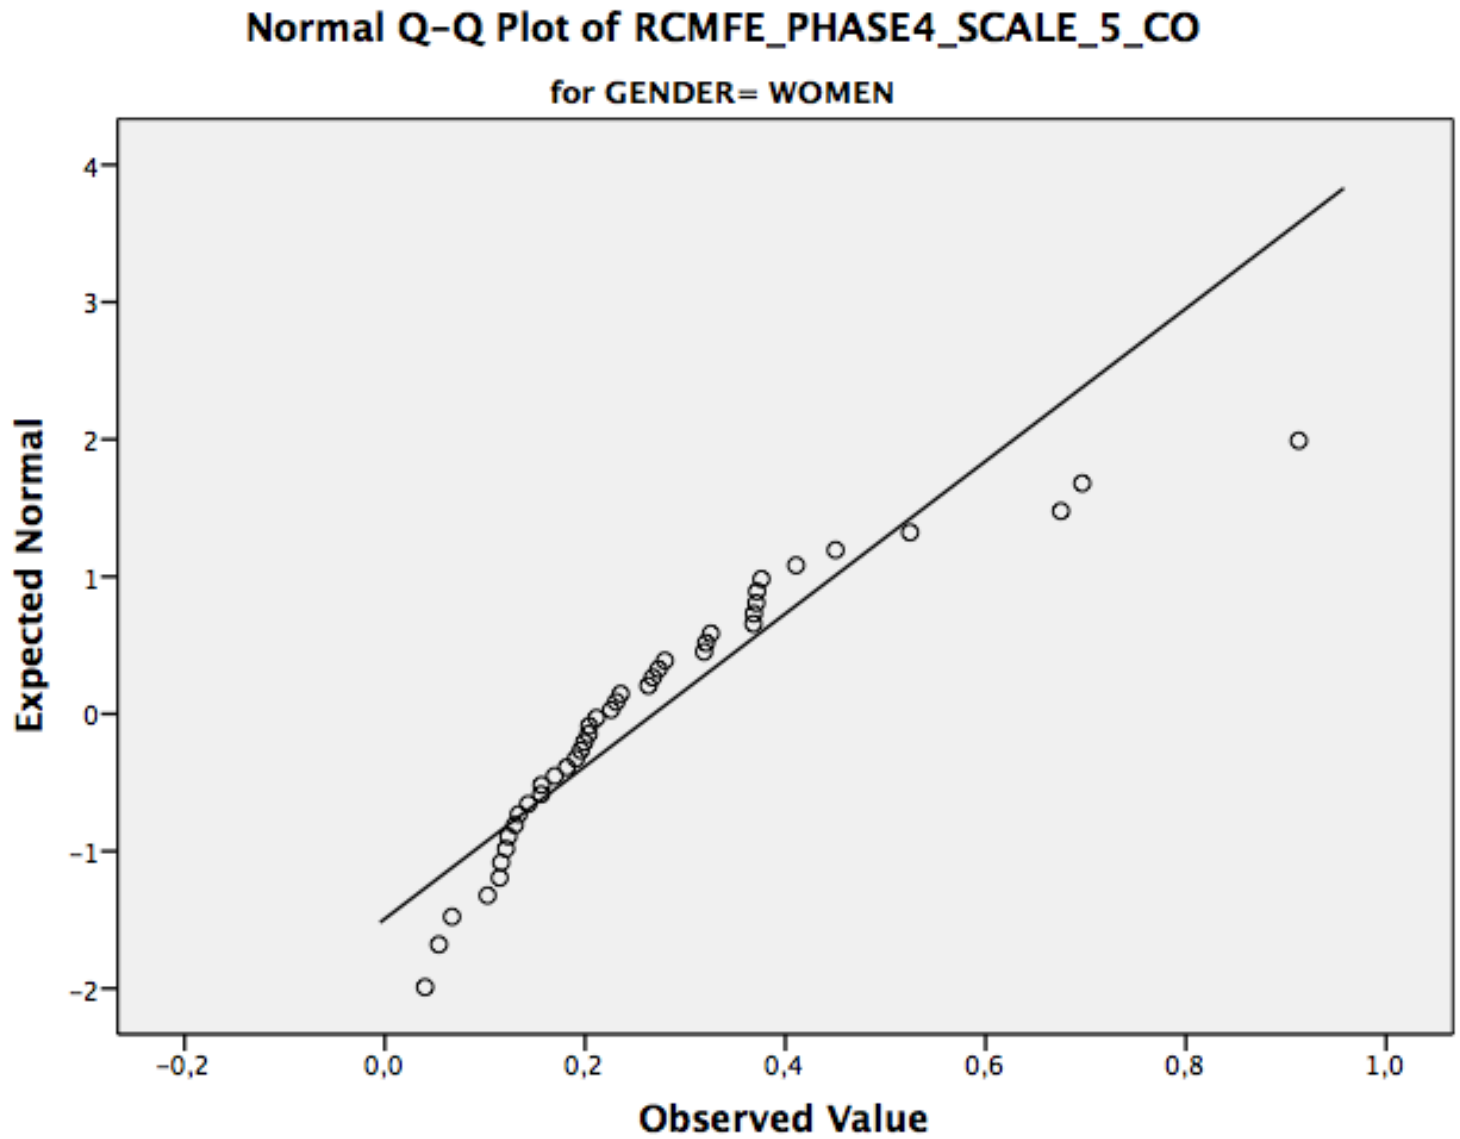

## Normal Q-Q Plot of RCMFE\_PHASE4\_SCALE\_5\_CO

for GENDER= MEN

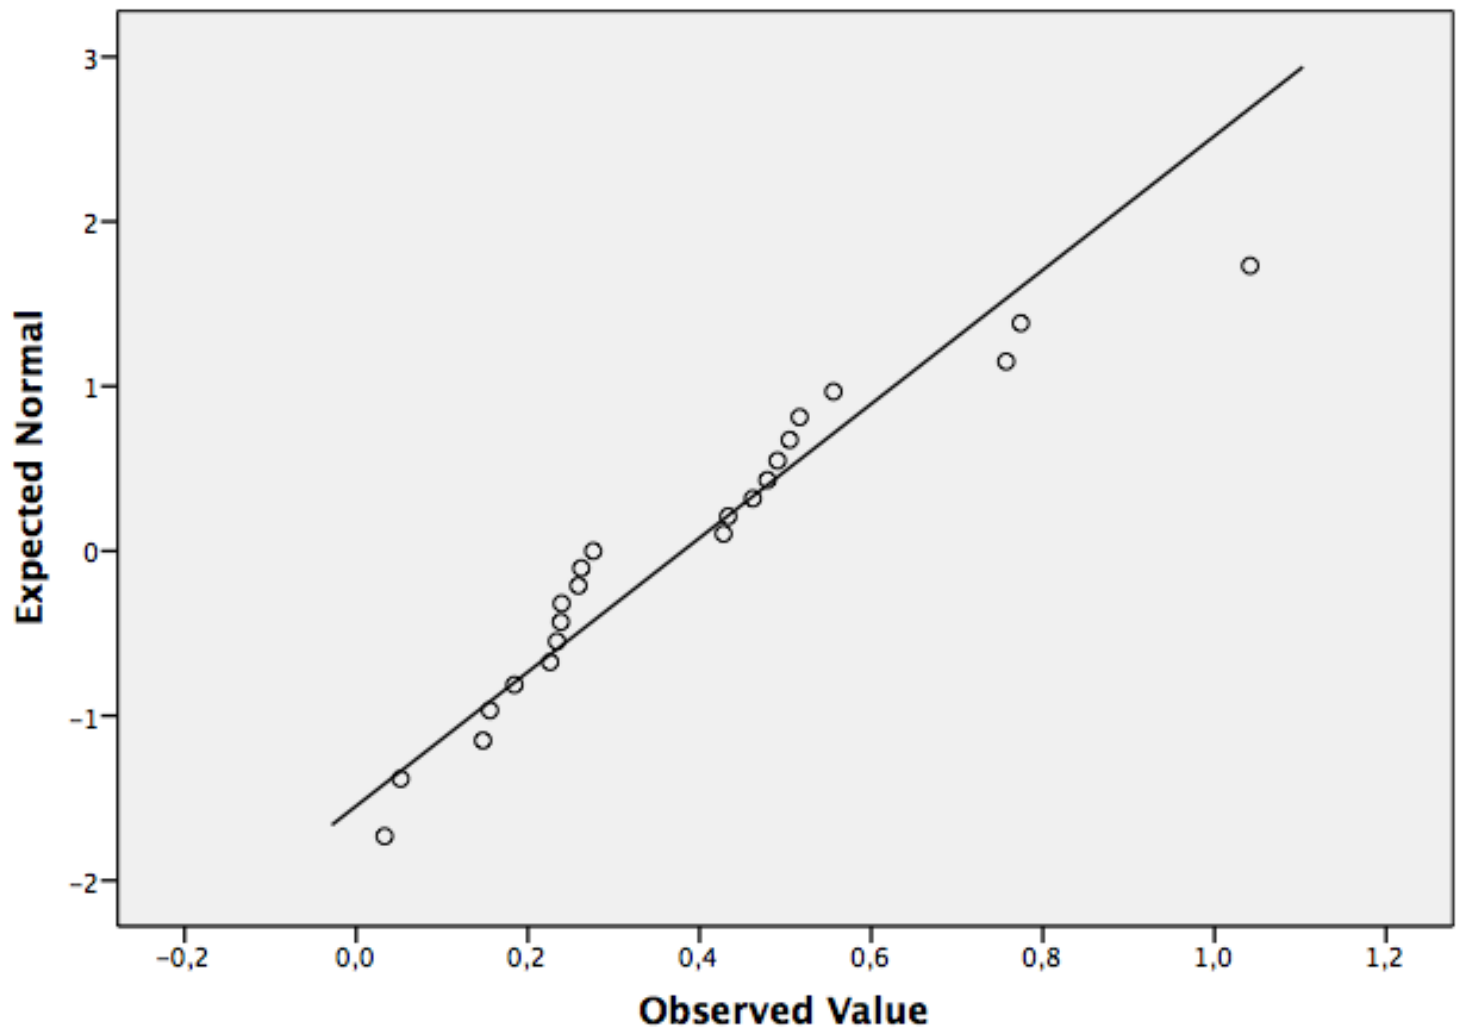

RCMFE\_PHASE5\_SCALE\_1\_CO

Normal Q-Q Plots

# Normal Q-Q Plot of RCMFE\_PHASE5\_SCALE\_1\_CO

for GENDER= WOMEN

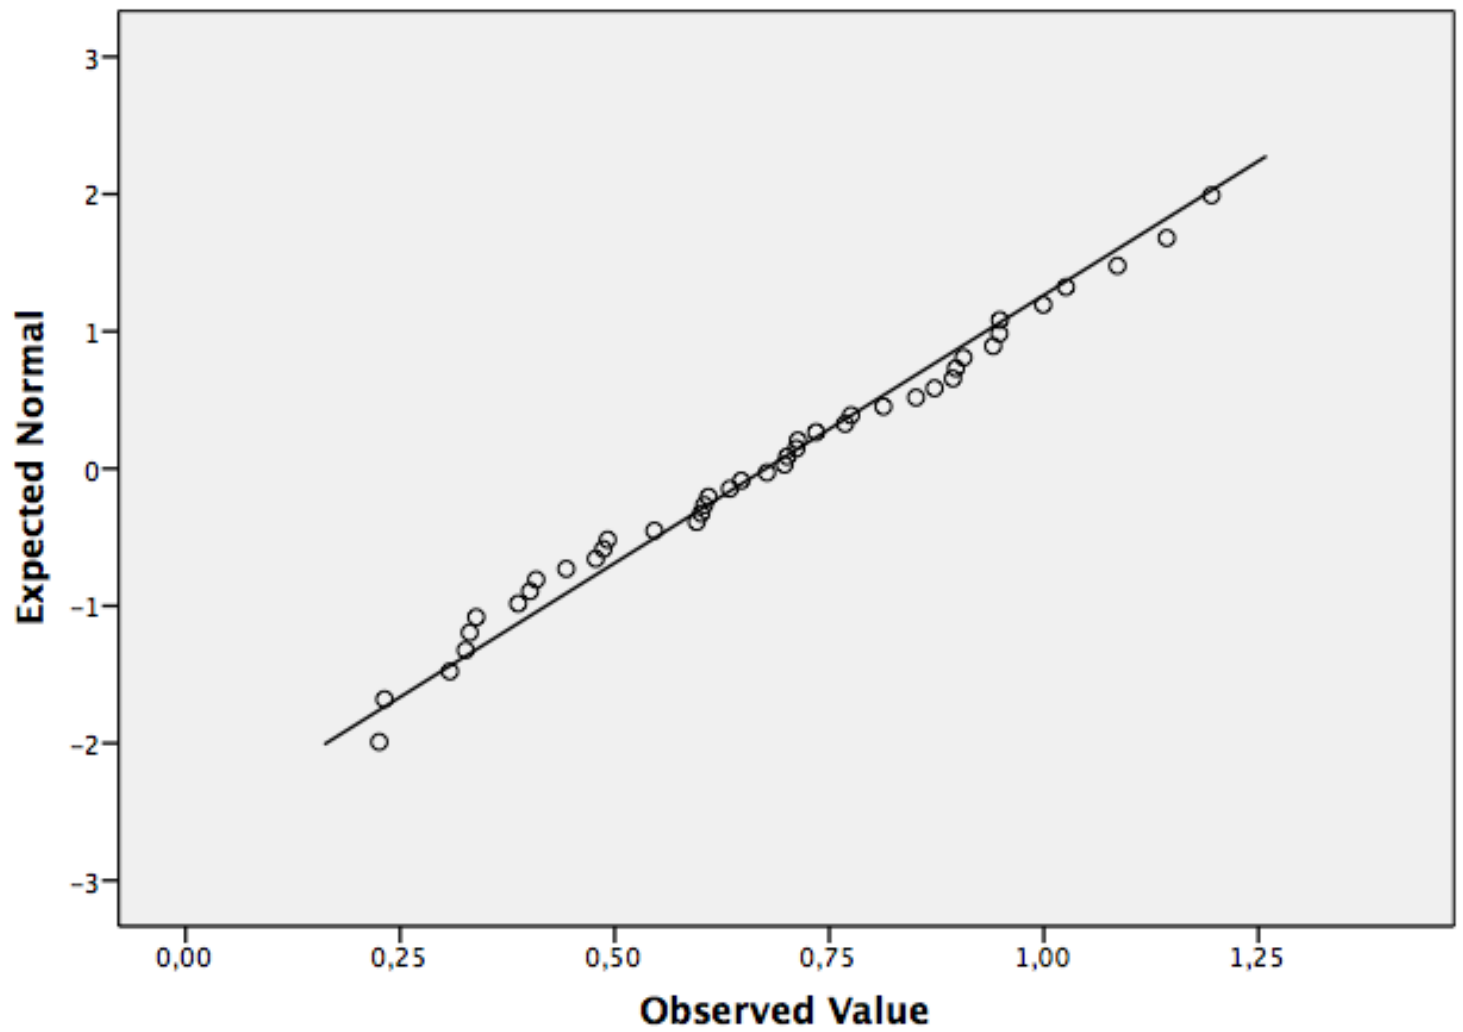



# Normal Q-Q Plot of RCMFE\_PHASE5\_SCALE\_1\_CO

for GENDER= MEN

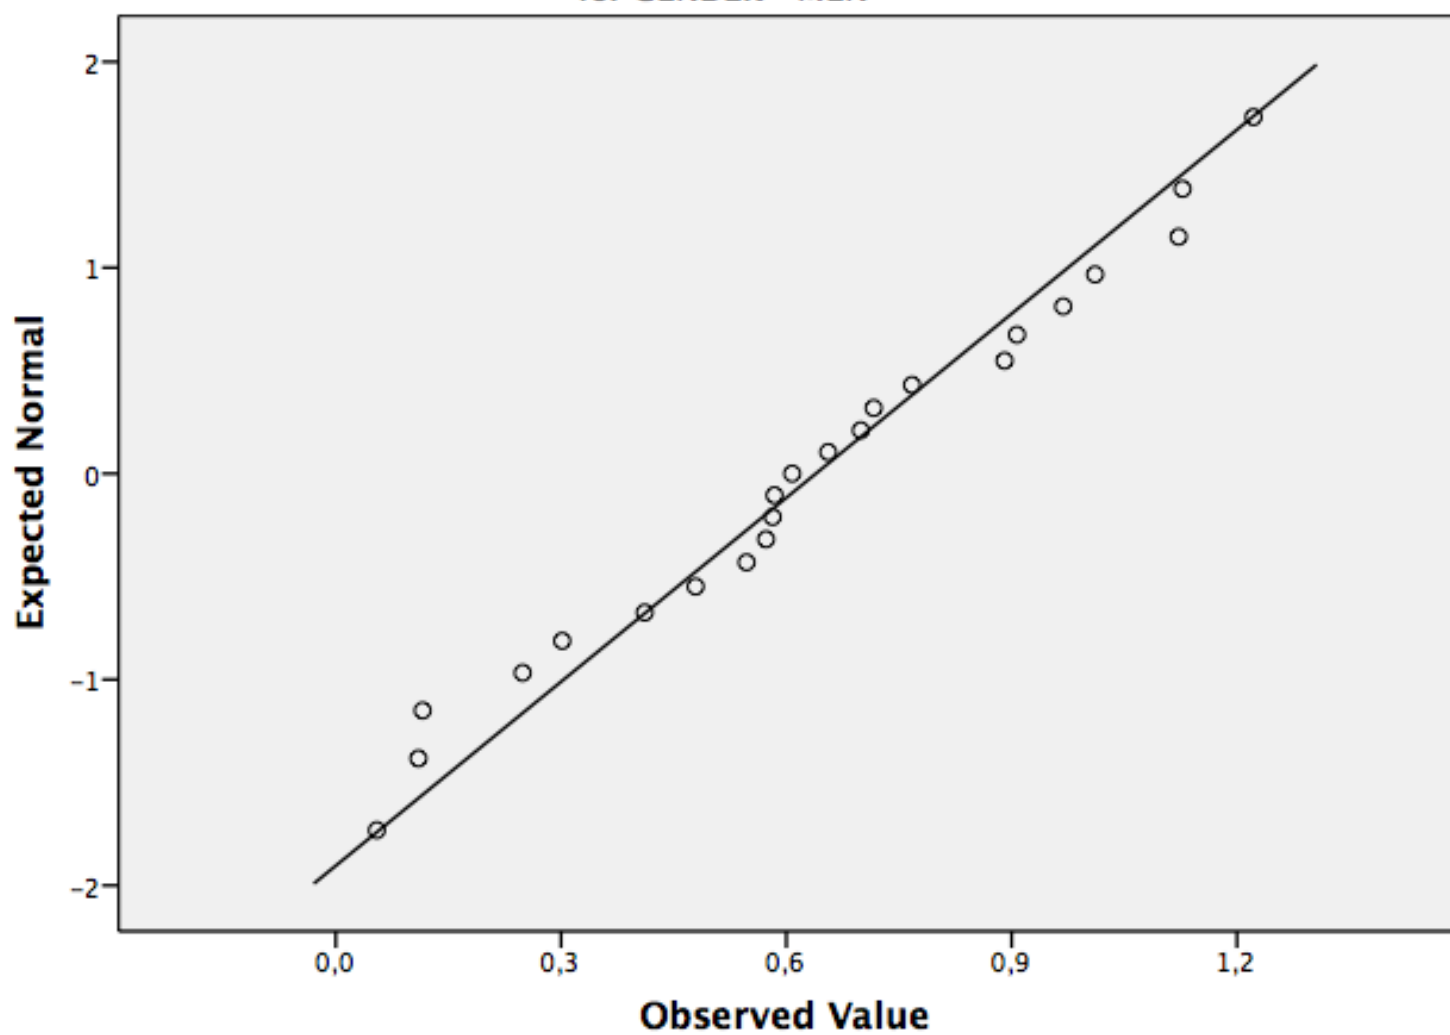

Normal Q-Q Plots

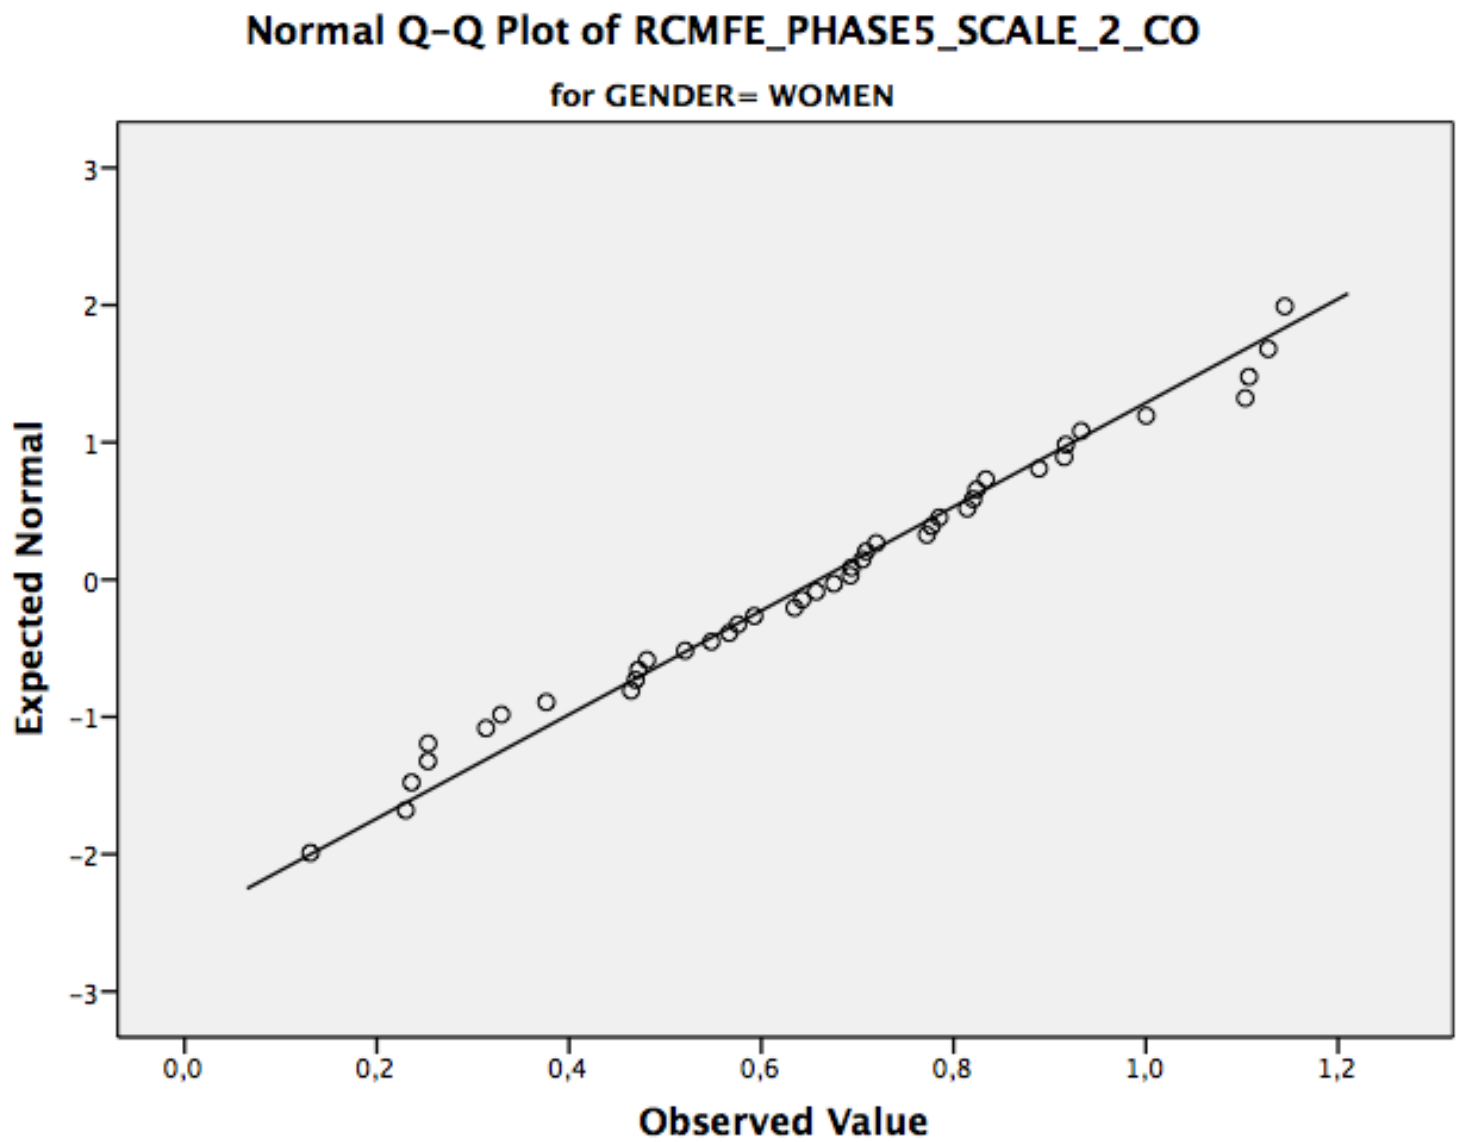

# Normal Q-Q Plot of RCMFE\_PHASE5\_SCALE\_2\_CO

for GENDER= MEN

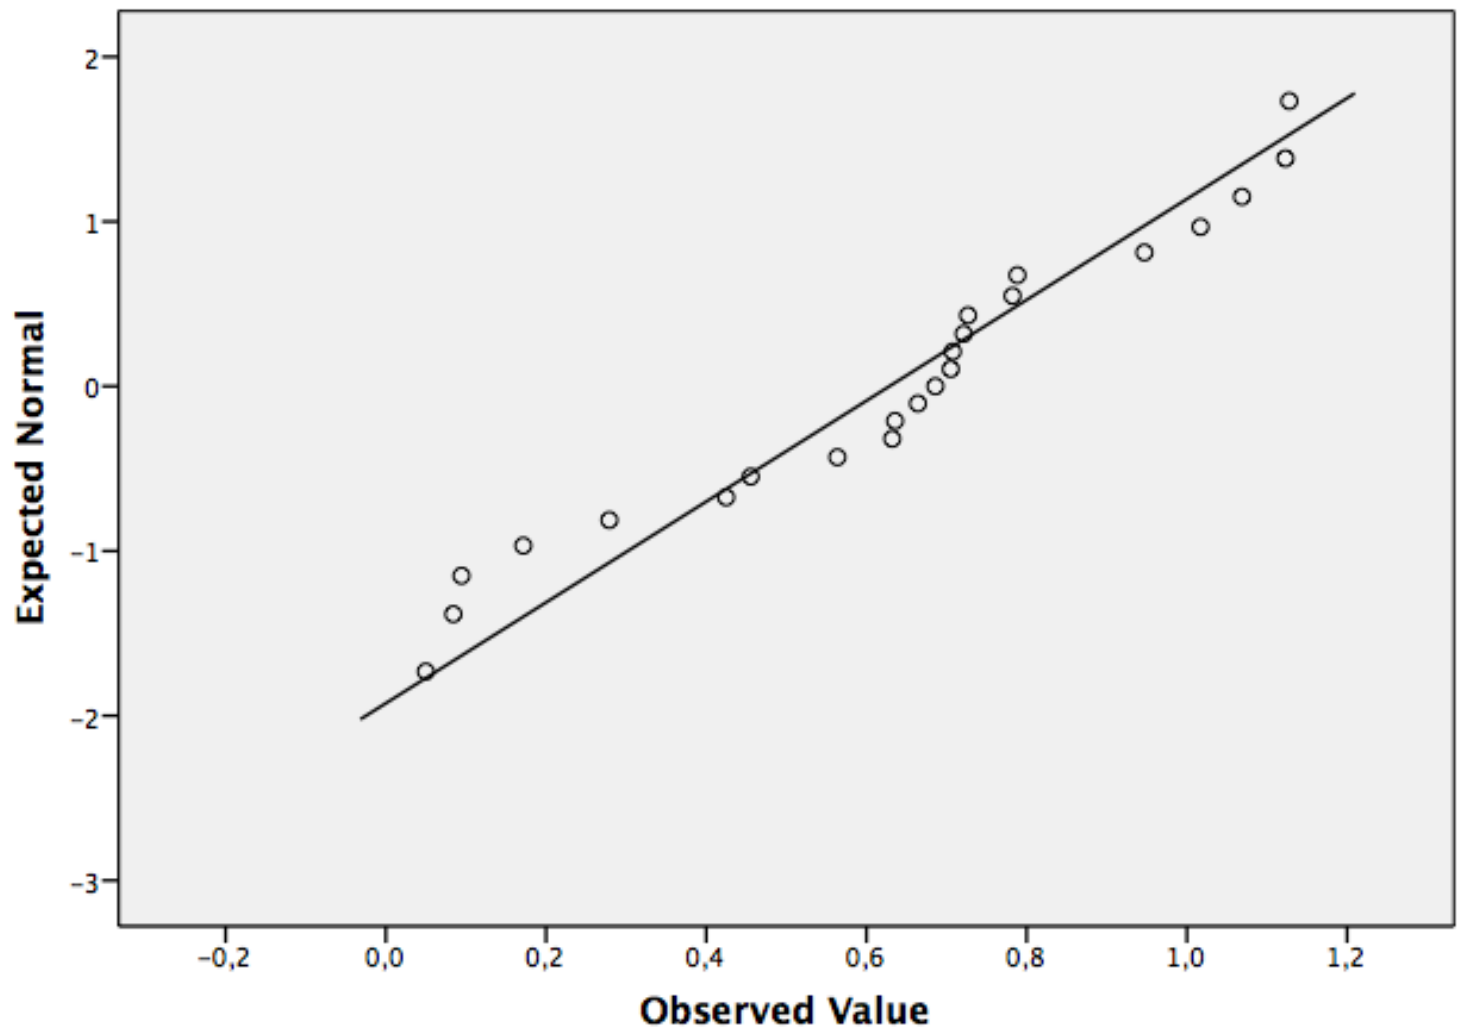

Normal Q-Q Plots

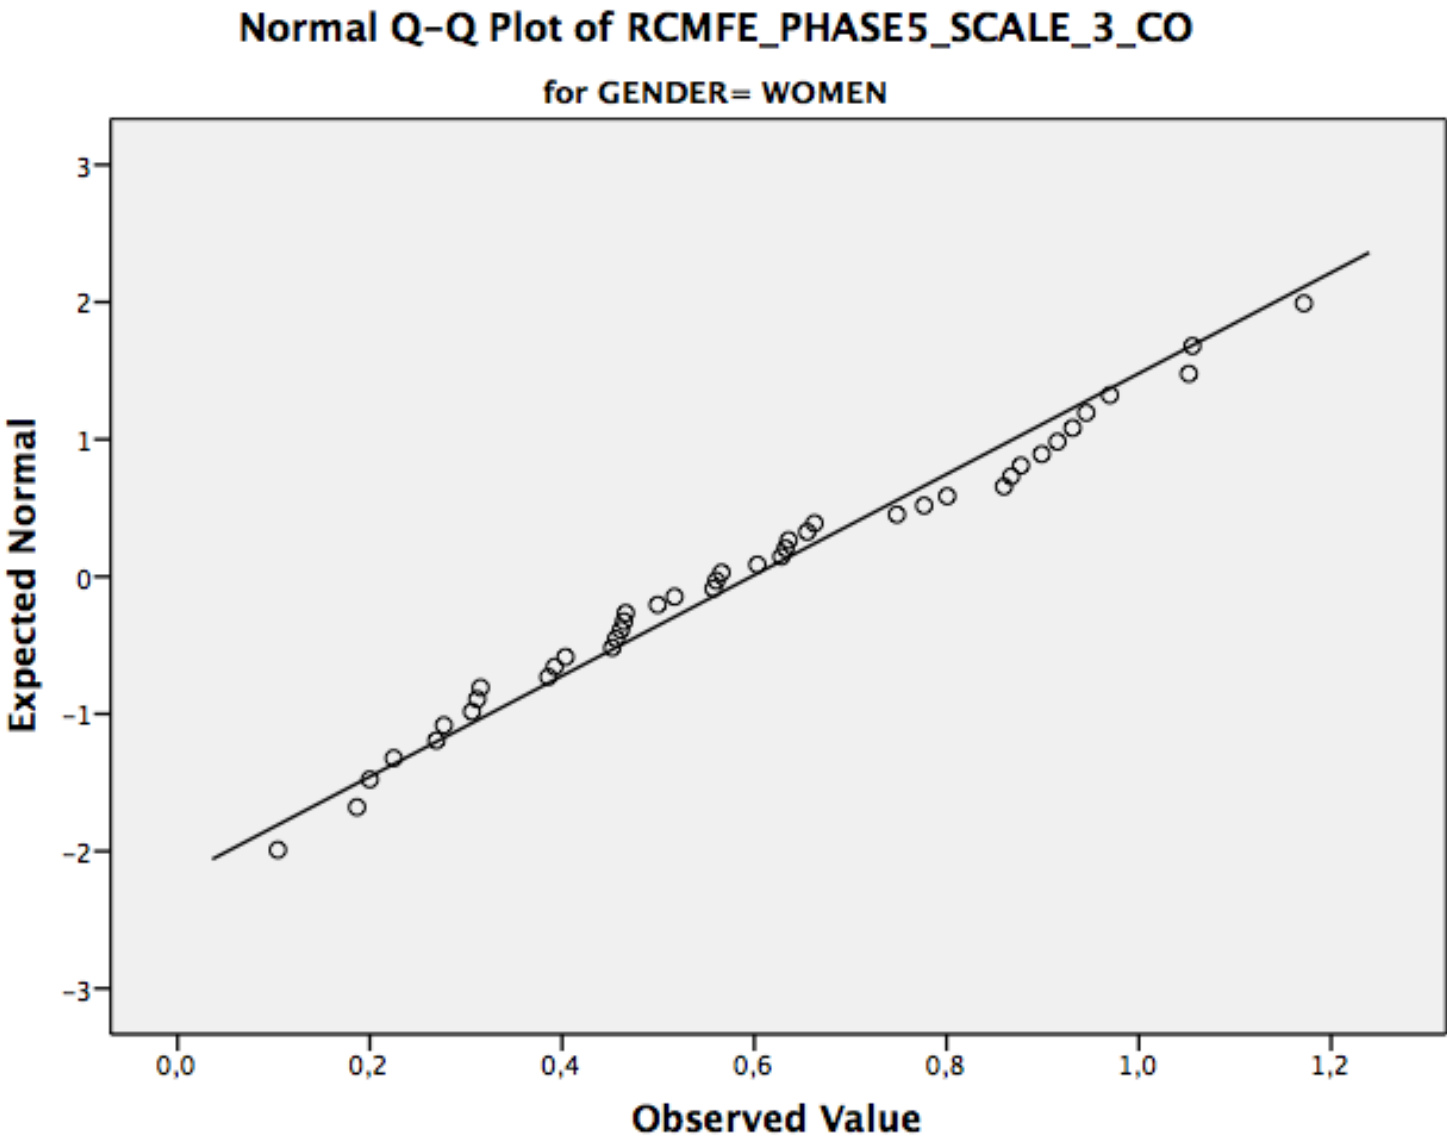

# Normal Q-Q Plot of RCMFE\_PHASE5\_SCALE\_3\_CO

for GENDER= MEN

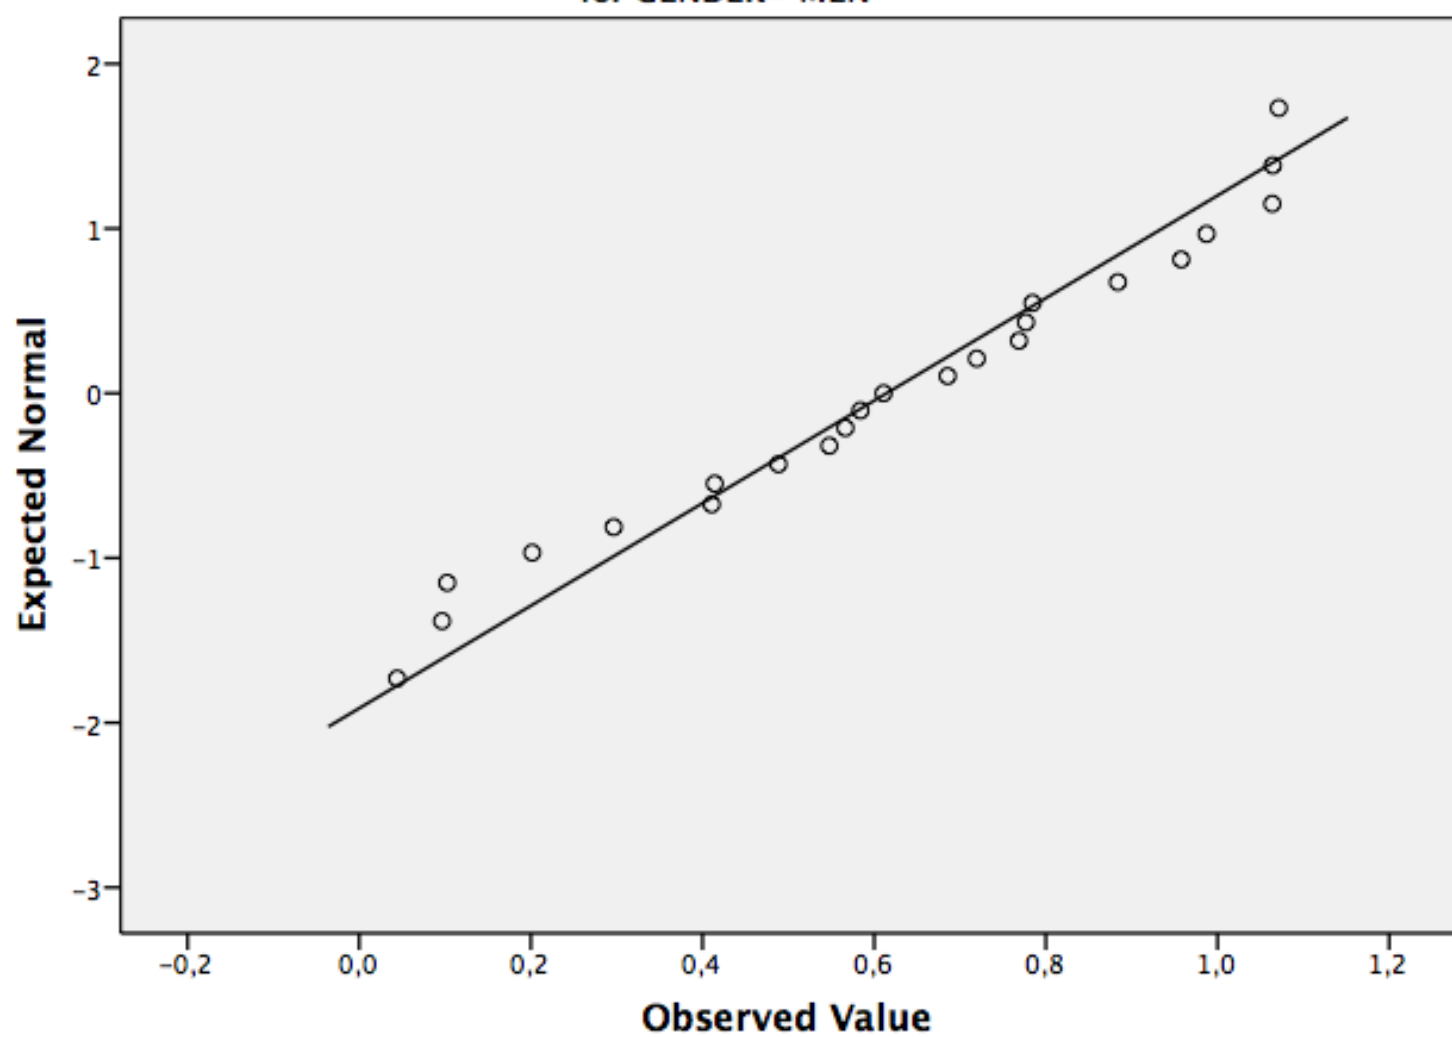

Normal Q-Q Plots

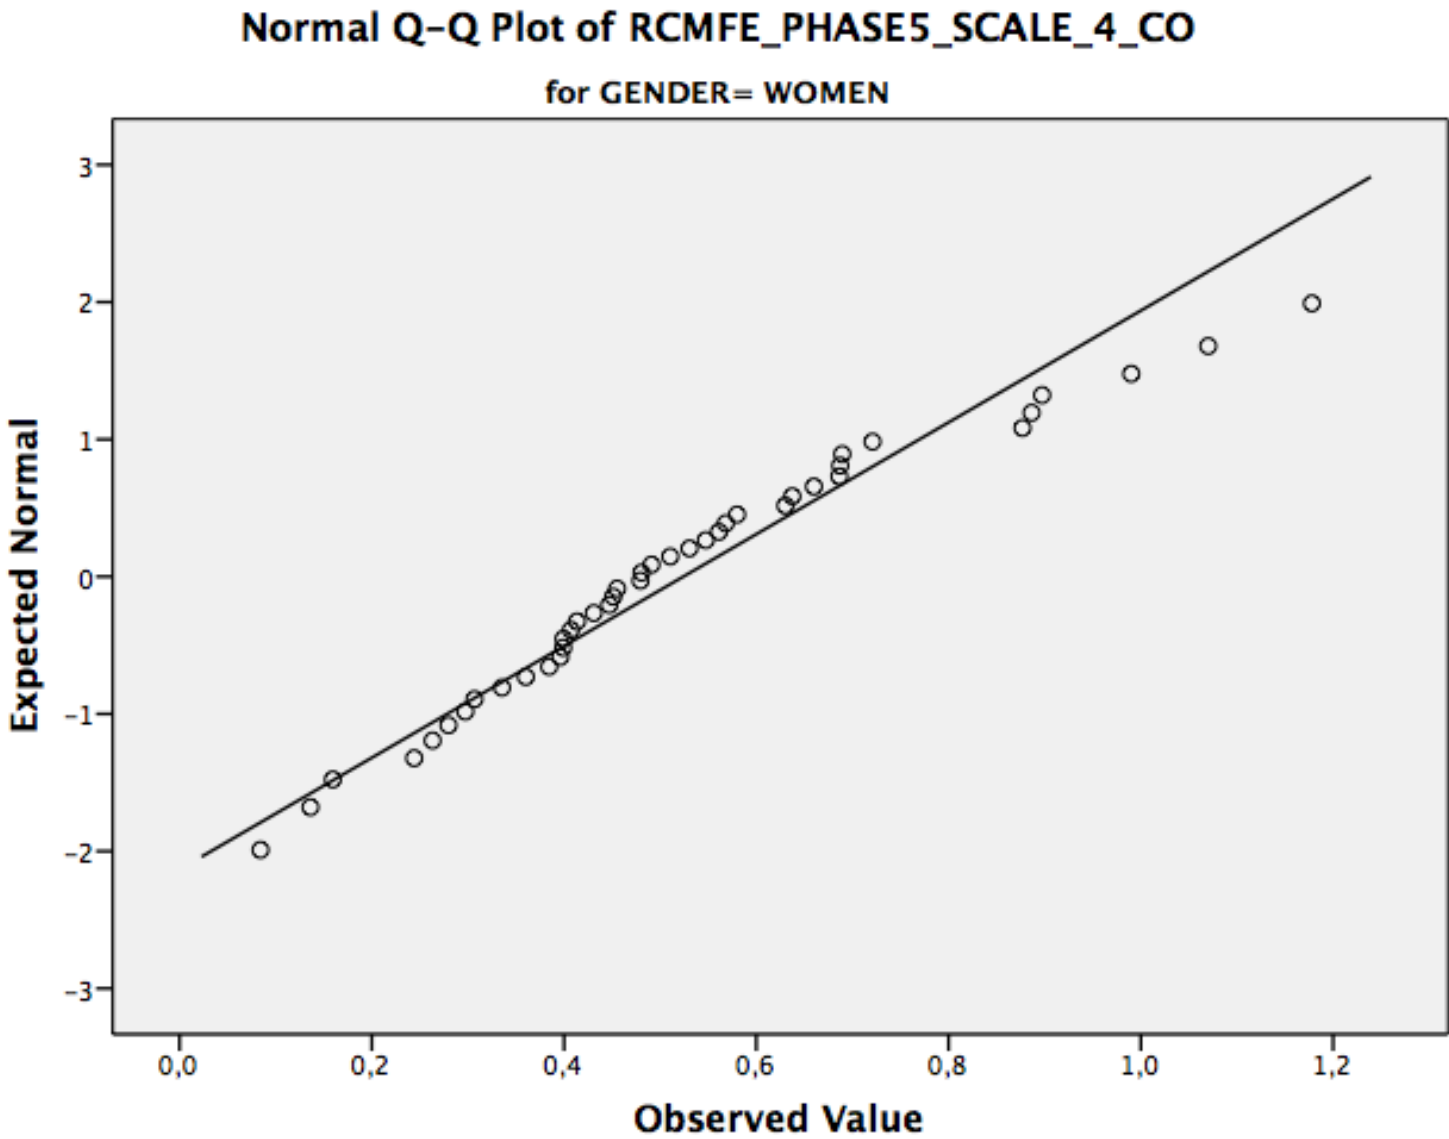

# Normal Q-Q Plot of RCMFE\_PHASE5\_SCALE\_4\_CO

for GENDER= MEN

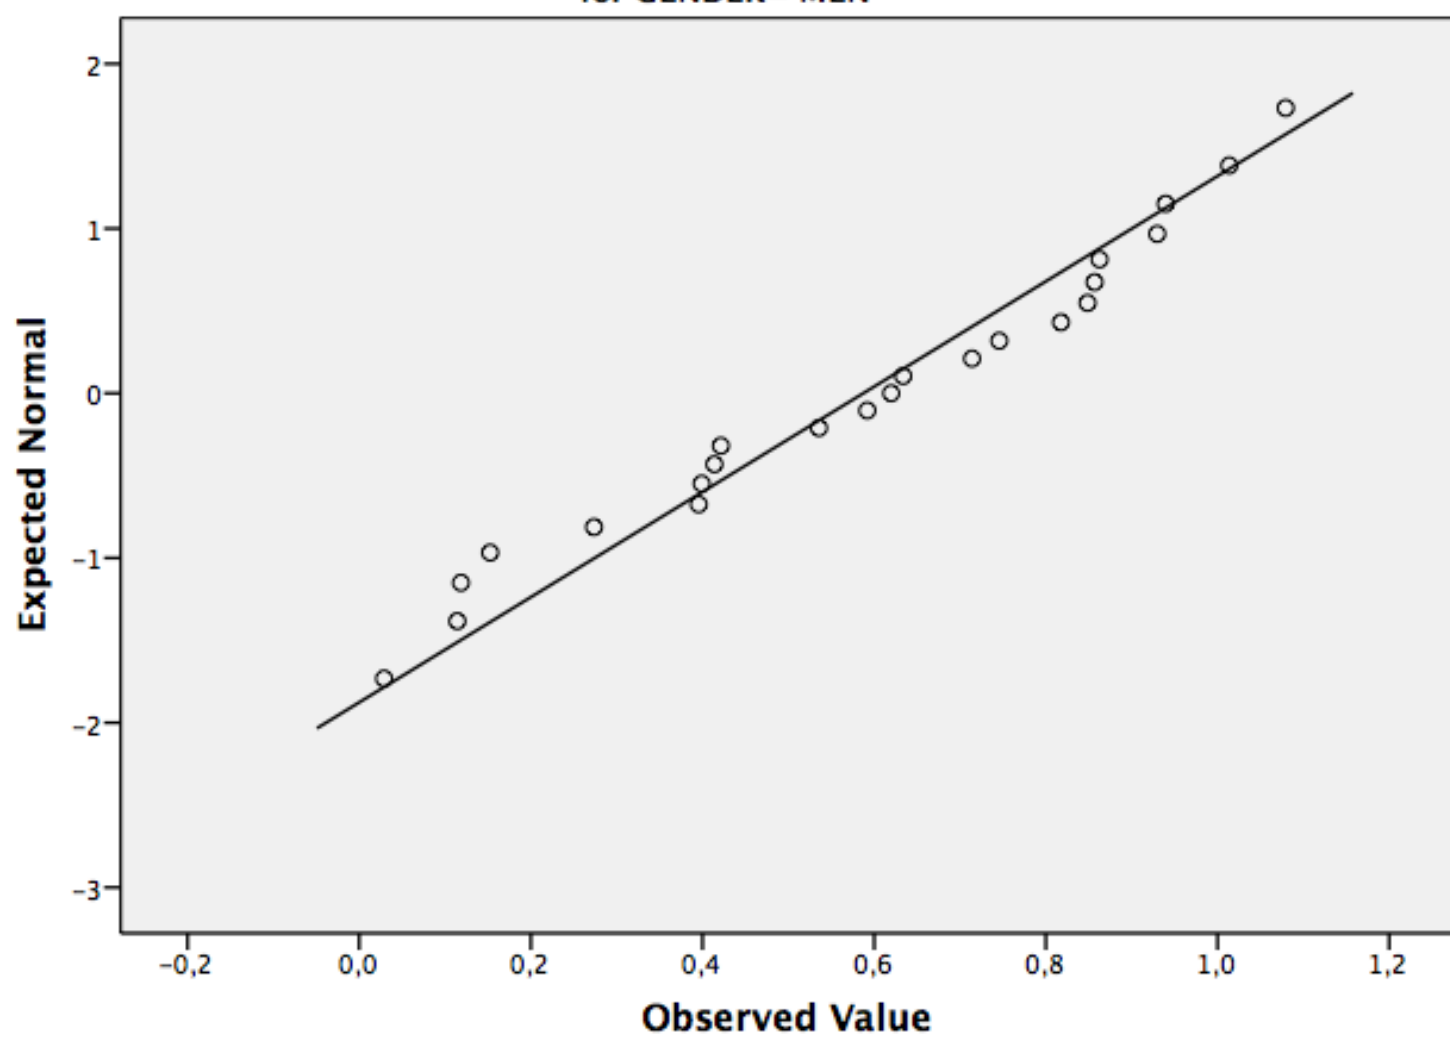

Normal Q-Q Plots

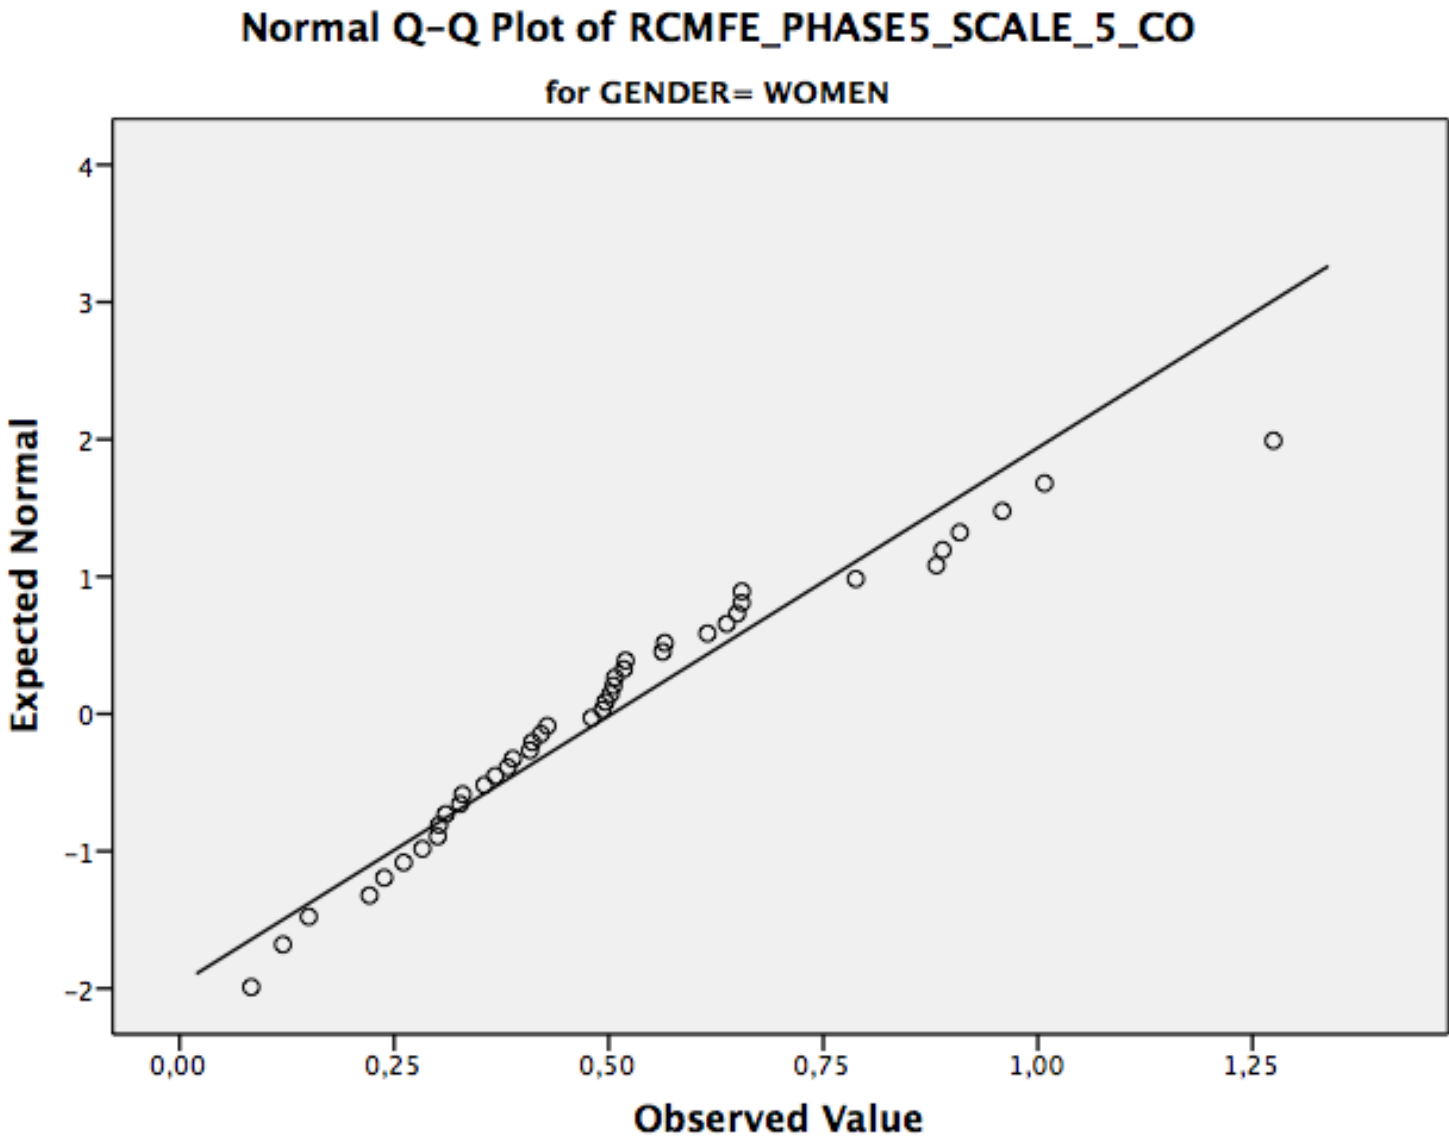



# Normal Q-Q Plot of RCMFE\_PHASE5\_SCALE\_5\_CO

for GENDER= MEN

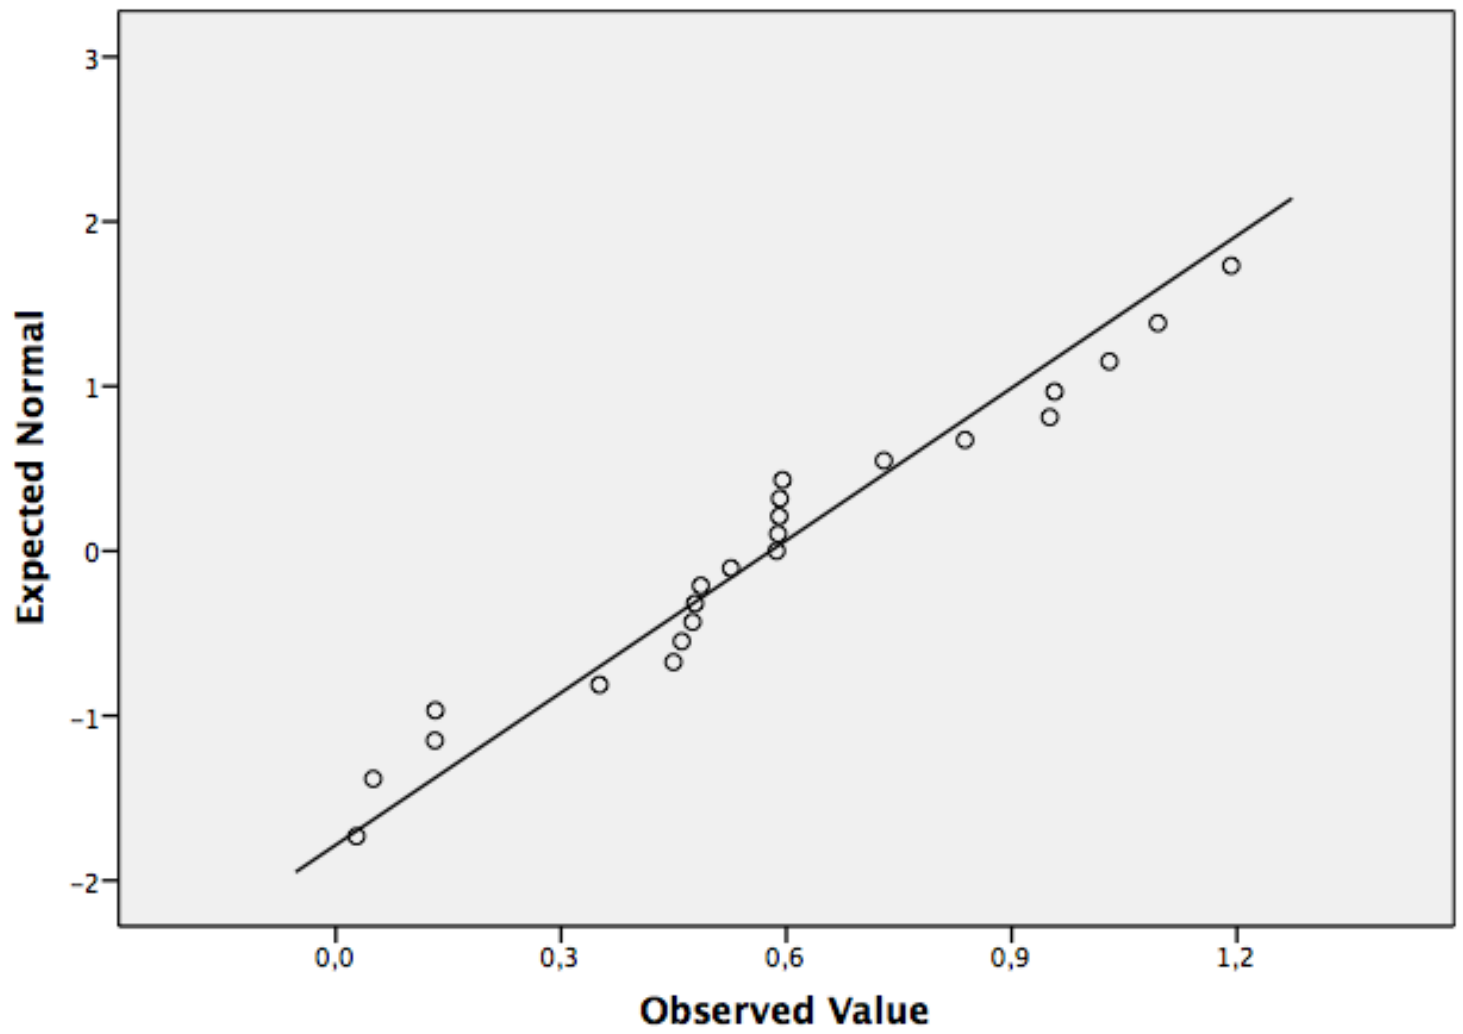

PATHOLOGY

Case Processing Summary

| PATHOLOGY                  | Cases |         |         |         |       |         |
|----------------------------|-------|---------|---------|---------|-------|---------|
|                            | Valid |         | Missing |         | Total |         |
|                            | N     | Percent | N       | Percent | N     | Percent |
| RCMFE_PHASE1_SCALE_1 NO-OI | 29    | 100,0%  | 0       | 0,0%    | 29    | 100,0%  |
| _CO OI                     | 36    | 100,0%  | 0       | 0,0%    | 36    | 100,0%  |
| RCMFE_PHASE1_SCALE_2 NO-OI | 29    | 100,0%  | 0       | 0,0%    | 29    | 100,0%  |
| _CO OI                     | 36    | 100,0%  | 0       | 0,0%    | 36    | 100,0%  |
| RCMFE_PHASE1_SCALE_3 NO-OI | 29    | 100,0%  | 0       | 0,0%    | 29    | 100,0%  |
| _CO OI                     | 36    | 100,0%  | 0       | 0,0%    | 36    | 100,0%  |
| RCMFE_PHASE1_SCALE_4 NO-OI | 29    | 100,0%  | 0       | 0,0%    | 29    | 100,0%  |
| _CO OI                     | 36    | 100,0%  | 0       | 0,0%    | 36    | 100,0%  |
| RCMFE_PHASE1_SCALE_5 NO-OI | 29    | 100,0%  | 0       | 0,0%    | 29    | 100,0%  |
| _CO OI                     | 36    | 100,0%  | 0       | 0,0%    | 36    | 100,0%  |
| RCMFE_PHASE2_SCALE_1 NO-OI | 29    | 100,0%  | 0       | 0,0%    | 29    | 100,0%  |
| _CO OI                     | 36    | 100,0%  | 0       | 0,0%    | 36    | 100,0%  |
| RCMFE_PHASE2_SCALE_2 NO-OI | 29    | 100,0%  | 0       | 0,0%    | 29    | 100,0%  |
| _CO OI                     | 36    | 100,0%  | 0       | 0,0%    | 36    | 100,0%  |
| RCMFE_PHASE2_SCALE_3 NO-OI | 29    | 100,0%  | 0       | 0,0%    | 29    | 100,0%  |
| _CO OI                     | 36    | 100,0%  | 0       | 0,0%    | 36    | 100,0%  |
| RCMFE_PHASE2_SCALE_4 NO-OI | 29    | 100,0%  | 0       | 0,0%    | 29    | 100,0%  |
| _CO OI                     | 36    | 100,0%  | 0       | 0,0%    | 36    | 100,0%  |
| RCMFE_PHASE2_SCALE_5 NO-OI | 29    | 100,0%  | 0       | 0,0%    | 29    | 100,0%  |
| _CO OI                     | 36    | 100,0%  | 0       | 0,0%    | 36    | 100,0%  |
| RCMFE_PHASE3_SCALE_1 NO-OI | 29    | 100,0%  | 0       | 0,0%    | 29    | 100,0%  |
| _CO OI                     | 36    | 100,0%  | 0       | 0,0%    | 36    | 100,0%  |
| RCMFE_PHASE3_SCALE_2 NO-OI | 29    | 100,0%  | 0       | 0,0%    | 29    | 100,0%  |
| _CO OI                     | 36    | 100,0%  | 0       | 0,0%    | 36    | 100,0%  |
| RCMFE_PHASE3_SCALE_3 NO-OI | 29    | 100,0%  | 0       | 0,0%    | 29    | 100,0%  |
| _CO OI                     | 36    | 100,0%  | 0       | 0,0%    | 36    | 100,0%  |
| RCMFE_PHASE3_SCALE_4 NO-OI | 29    | 100,0%  | 0       | 0,0%    | 29    | 100,0%  |
| _CO OI                     | 36    | 100,0%  | 0       | 0,0%    | 36    | 100,0%  |
| RCMFE_PHASE3_SCALE_5 NO-OI | 29    | 100,0%  | 0       | 0,0%    | 29    | 100,0%  |
| _CO OI                     | 36    | 100,0%  | 0       | 0,0%    | 36    | 100,0%  |
| RCMFE_PHASE4_SCALE_1 NO-OI | 29    | 100,0%  | 0       | 0,0%    | 29    | 100,0%  |
| _CO OI                     | 36    | 100,0%  | 0       | 0,0%    | 36    | 100,0%  |
| RCMFE_PHASE4_SCALE_2 NO-OI | 29    | 100,0%  | 0       | 0,0%    | 29    | 100,0%  |
| _CO OI                     | 36    | 100,0%  | 0       | 0,0%    | 36    | 100,0%  |
| RCMFE_PHASE4_SCALE_3 NO-OI | 29    | 100,0%  | 0       | 0,0%    | 29    | 100,0%  |
| OI                         | 36    | 100,0%  | 0       | 0,0%    | 36    | 100,0%  |
| RCMFE_PHASE4_SCALE_4 NO-OI | 29    | 100,0%  | 0       | 0,0%    | 29    | 100,0%  |
| _CO OI                     | 36    | 100,0%  | 0       | 0,0%    | 36    | 100,0%  |
| RCMFE_PHASE4_SCALE_5 NO-OI | 29    | 100,0%  | 0       | 0,0%    | 29    | 100,0%  |
| _CO OI                     | 36    | 100,0%  | 0       | 0,0%    | 36    | 100,0%  |
| RCMFE_PHASE5_SCALE_1 NO-OI | 29    | 100,0%  | 0       | 0,0%    | 29    | 100,0%  |
| CO                         |       |         |         |         |       |         |

### Case Processing Summary

| PATHOLOGY            |       | Cases |         |         |         |       |         |
|----------------------|-------|-------|---------|---------|---------|-------|---------|
|                      |       | Valid |         | Missing |         | Total |         |
|                      |       | N     | Percent | N       | Percent | N     | Percent |
| RCMFE_PHASE5_SCALE_1 | OI    | 36    | 100,0%  | 0       | 0,0%    | 36    | 100,0%  |
| _CO                  |       |       |         |         |         |       |         |
| RCMFE_PHASE5_SCALE_2 | NO-OI | 29    | 100,0%  | 0       | 0,0%    | 29    | 100,0%  |
| _CO                  | OI    | 36    | 100,0%  | 0       | 0,0%    | 36    | 100,0%  |
| RCMFE_PHASE5_SCALE_3 | NO-OI | 29    | 100,0%  | 0       | 0,0%    | 29    | 100,0%  |
| _CO                  | OI    | 36    | 100,0%  | 0       | 0,0%    | 36    | 100,0%  |
| RCMFE_PHASE5_SCALE_4 | NO-OI | 29    | 100,0%  | 0       | 0,0%    | 29    | 100,0%  |
| _CO                  | OI    | 36    | 100,0%  | 0       | 0,0%    | 36    | 100,0%  |
| RCMFE_PHASE5_SCALE_5 | NO-OI | 29    | 100,0%  | 0       | 0,0%    | 29    | 100,0%  |
| _CO                  | OI    | 36    | 100,0%  | 0       | 0,0%    | 36    | 100,0%  |

### Tests of Normality

| PATHOLOGY            |       | Kolmogorov-Smirnov <sup>a</sup> |    |       | Shapiro-Wilk |    |      |
|----------------------|-------|---------------------------------|----|-------|--------------|----|------|
|                      |       | Statistic                       | df | Sig.  | Statistic    | df | Sig. |
| RCMFE_PHASE1_SCALE_1 | NO-OI | ,109                            | 29 | ,200* | ,976         | 29 | ,719 |
| _CO                  | OI    | ,101                            | 36 | ,200* | ,976         | 36 | ,605 |
| RCMFE_PHASE1_SCALE_2 | NO-OI | ,130                            | 29 | ,200* | ,971         | 29 | ,582 |
| _CO                  | OI    | ,094                            | 36 | ,200* | ,968         | 36 | ,380 |
| RCMFE_PHASE1_SCALE_3 | NO-OI | ,095                            | 29 | ,200* | ,975         | 29 | ,690 |
| _CO                  | OI    | ,101                            | 36 | ,200* | ,960         | 36 | ,222 |
| RCMFE_PHASE1_SCALE_4 | NO-OI | ,076                            | 29 | ,200* | ,972         | 29 | ,626 |
| _CO                  | OI    | ,115                            | 36 | ,200* | ,970         | 36 | ,415 |
| RCMFE_PHASE1_SCALE_5 | NO-OI | ,087                            | 29 | ,200* | ,982         | 29 | ,896 |
| _CO                  | OI    | ,081                            | 36 | ,200* | ,973         | 36 | ,528 |
| RCMFE_PHASE2_SCALE_1 | NO-OI | ,107                            | 29 | ,200* | ,977         | 29 | ,750 |
| _CO                  | OI    | ,127                            | 36 | ,154  | ,969         | 36 | ,391 |
| RCMFE_PHASE2_SCALE_2 | NO-OI | ,098                            | 29 | ,200* | ,978         | 29 | ,773 |
| _CO                  | OI    | ,091                            | 36 | ,200* | ,981         | 36 | ,771 |
| RCMFE_PHASE2_SCALE_3 | NO-OI | ,112                            | 29 | ,200* | ,949         | 29 | ,174 |
| _CO                  | OI    | ,067                            | 36 | ,200* | ,982         | 36 | ,810 |
| RCMFE_PHASE2_SCALE_4 | NO-OI | ,103                            | 29 | ,200* | ,953         | 29 | ,216 |
| _CO                  | OI    | ,078                            | 36 | ,200* | ,976         | 36 | ,596 |
| RCMFE_PHASE2_SCALE_5 | NO-OI | ,155                            | 29 | ,075  | ,918         | 29 | ,027 |
| _CO                  | OI    | ,135                            | 36 | ,095  | ,960         | 36 | ,209 |
| RCMFE_PHASE3_SCALE_1 | NO-OI | ,117                            | 29 | ,200* | ,961         | 29 | ,346 |
| _CO                  | OI    | ,131                            | 36 | ,125  | ,939         | 36 | ,048 |
| RCMFE_PHASE3_SCALE_2 | NO-OI | ,075                            | 29 | ,200* | ,978         | 29 | ,779 |
| _CO                  | OI    | ,087                            | 36 | ,200* | ,977         | 36 | ,645 |
| RCMFE_PHASE3_SCALE_3 | NO-OI | ,110                            | 29 | ,200* | ,984         | 29 | ,929 |
| _CO                  | OI    | ,065                            | 36 | ,200* | ,983         | 36 | ,845 |
| RCMFE_PHASE3_SCALE_4 | NO-OI | ,131                            | 29 | ,200* | ,964         | 29 | ,422 |
| _CO                  | OI    | ,110                            | 36 | ,200* | ,960         | 36 | ,211 |
| RCMFE_PHASE3_SCALE_5 | NO-OI | ,086                            | 29 | ,200* | ,975         | 29 | ,700 |

|                      |       |      |    |       |      |    |      |
|----------------------|-------|------|----|-------|------|----|------|
| _CO                  | OI    | ,108 | 36 | ,200* | ,966 | 36 | ,325 |
| RCMFE_PHASE4_SCALE_1 | NO-OI | ,213 | 29 | ,002  | ,769 | 29 | ,050 |
| _CO                  | OI    | ,177 | 36 | ,006  | ,905 | 36 | ,055 |
| RCMFE_PHASE4_SCALE_2 | NO-OI | ,167 | 29 | ,038  | ,833 | 29 | ,060 |
| _CO                  | OI    | ,152 | 36 | ,036  | ,907 | 36 | ,075 |
| RCMFE_PHASE4_SCALE_3 | NO-OI | ,178 | 29 | ,020  | ,842 | 29 | ,051 |
|                      | OI    | ,127 | 36 | ,155  | ,931 | 36 | ,027 |
| RCMFE_PHASE4_SCALE_4 | NO-OI | ,189 | 29 | ,009  | ,896 | 29 | ,058 |
| _CO                  | OI    | ,165 | 36 | ,015  | ,860 | 36 | ,070 |
| RCMFE_PHASE4_SCALE_5 | NO-OI | ,178 | 29 | ,019  | ,890 | 29 | ,066 |
| _CO                  | OI    | ,174 | 36 | ,007  | ,838 | 36 | ,080 |
| RCMFE_PHASE5_SCALE_1 | NO-OI | ,074 | 29 | ,200* | ,978 | 29 | ,795 |
| _CO                  | OI    | ,080 | 36 | ,200* | ,977 | 36 | ,643 |

#### Tests of Normality

| PATHOLOGY            |       | Kolmogorov-Smirnov <sup>a</sup> |    |       | Shapiro-Wilk |    |      |
|----------------------|-------|---------------------------------|----|-------|--------------|----|------|
|                      |       | Statistic                       | df | Sig.  | Statistic    | df | Sig. |
| RCMFE_PHASE5_SCALE_2 | NO-OI | ,149                            | 29 | ,101* | ,949         | 29 | ,167 |
| _CO                  | OI    | ,065                            | 36 | ,200* | ,976         | 36 | ,620 |
| RCMFE_PHASE5_SCALE_3 | NO-OI | ,104                            | 29 | ,200* | ,960         | 29 | ,334 |
| _CO                  | OI    | ,120                            | 36 | ,200* | ,967         | 36 | ,345 |
| RCMFE_PHASE5_SCALE_4 | NO-OI | ,068                            | 29 | ,200* | ,978         | 29 | ,785 |
| _CO                  | OI    | ,114                            | 36 | ,200* | ,959         | 36 | ,195 |
| RCMFE_PHASE5_SCALE_5 | NO-OI | ,128                            | 29 | ,200* | ,964         | 29 | ,411 |
| _CO                  | OI    | ,161                            | 36 | ,019* | ,939         | 36 | ,057 |

\*. This is a lower bound of the true significance.

a. Lilliefors Significance Correction

Normal Q-Q Plots

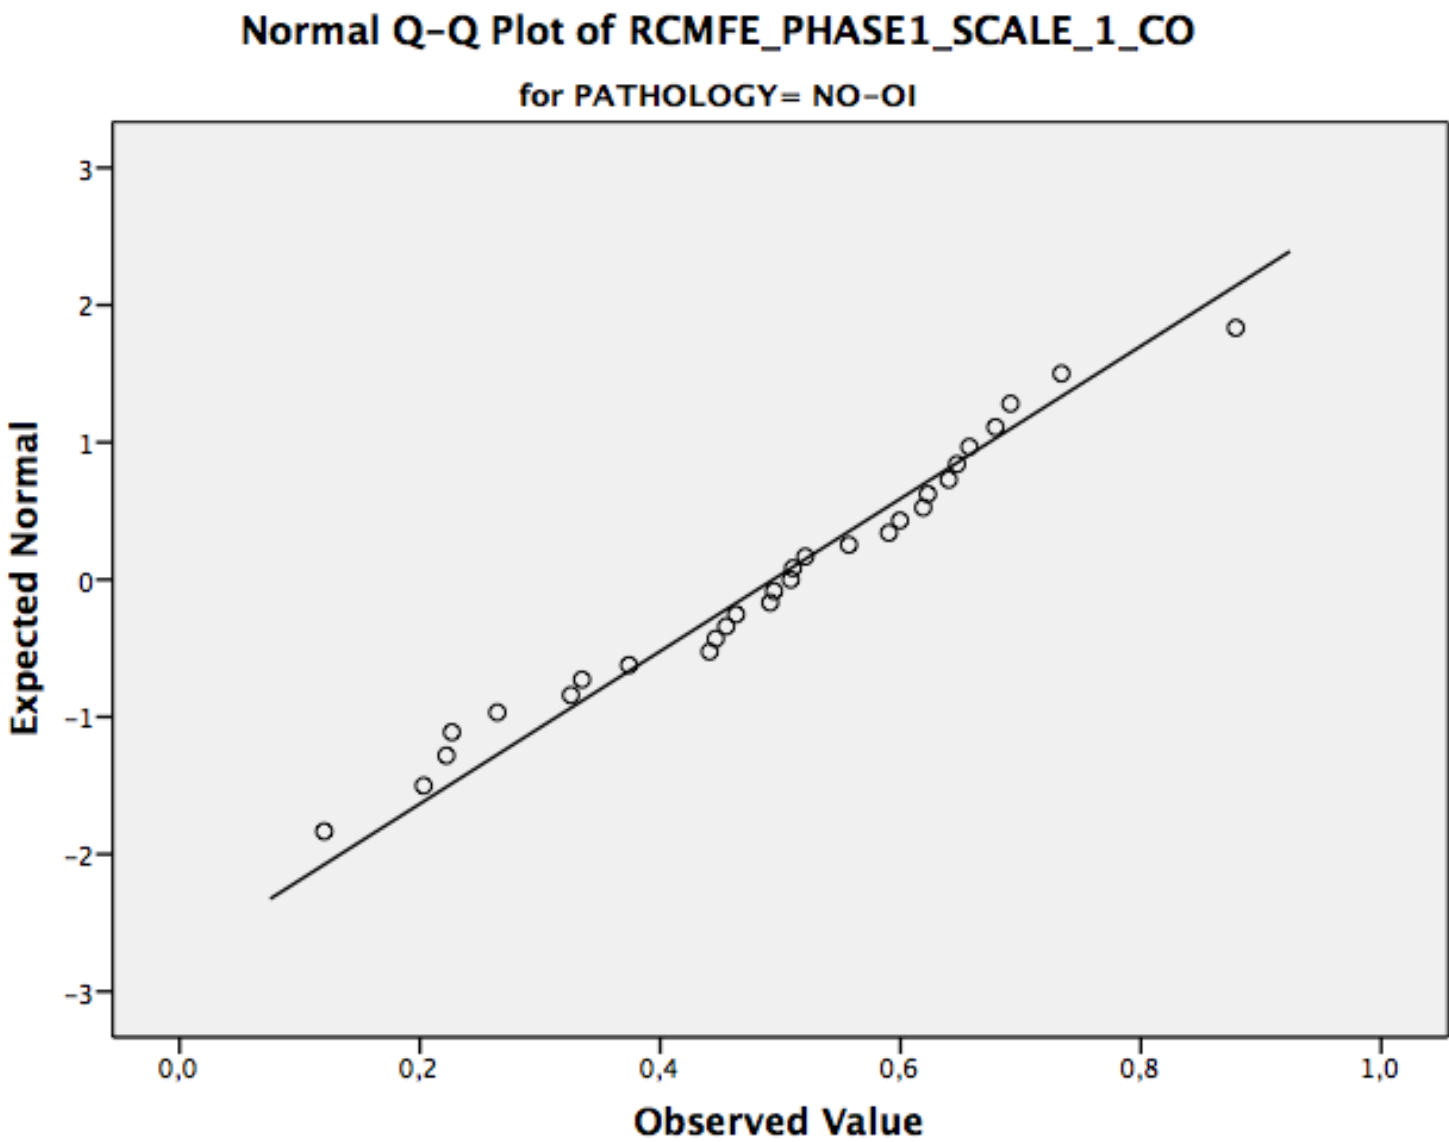

# Normal Q-Q Plot of RCMFE\_PHASE1\_SCALE\_1\_CO

for PATHOLOGY= OI

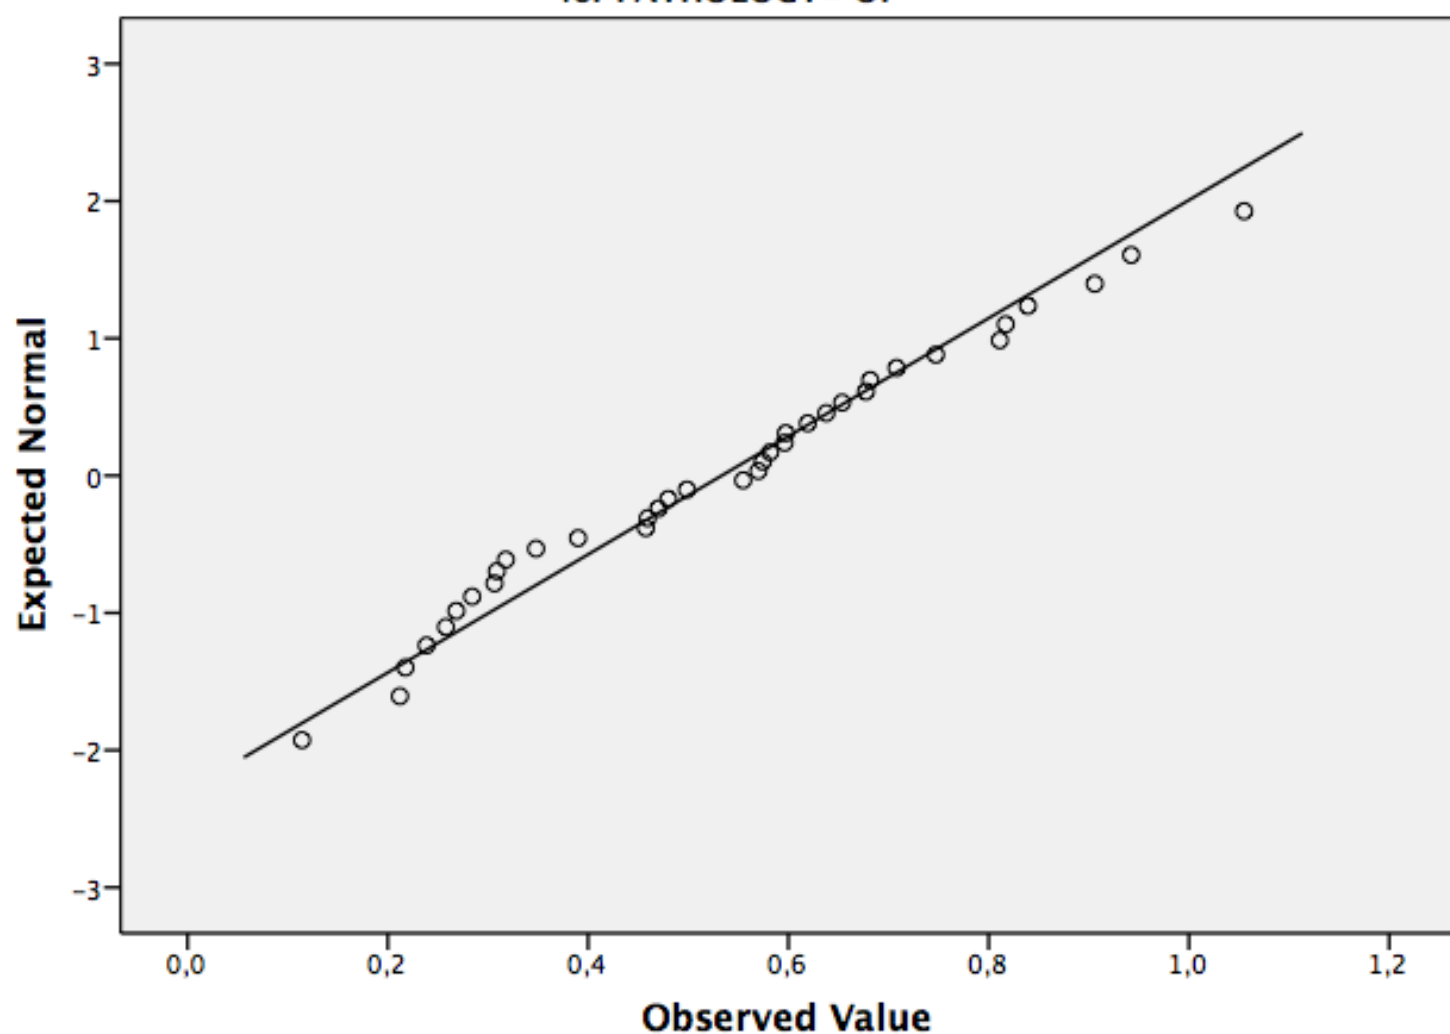

Normal Q-Q Plots

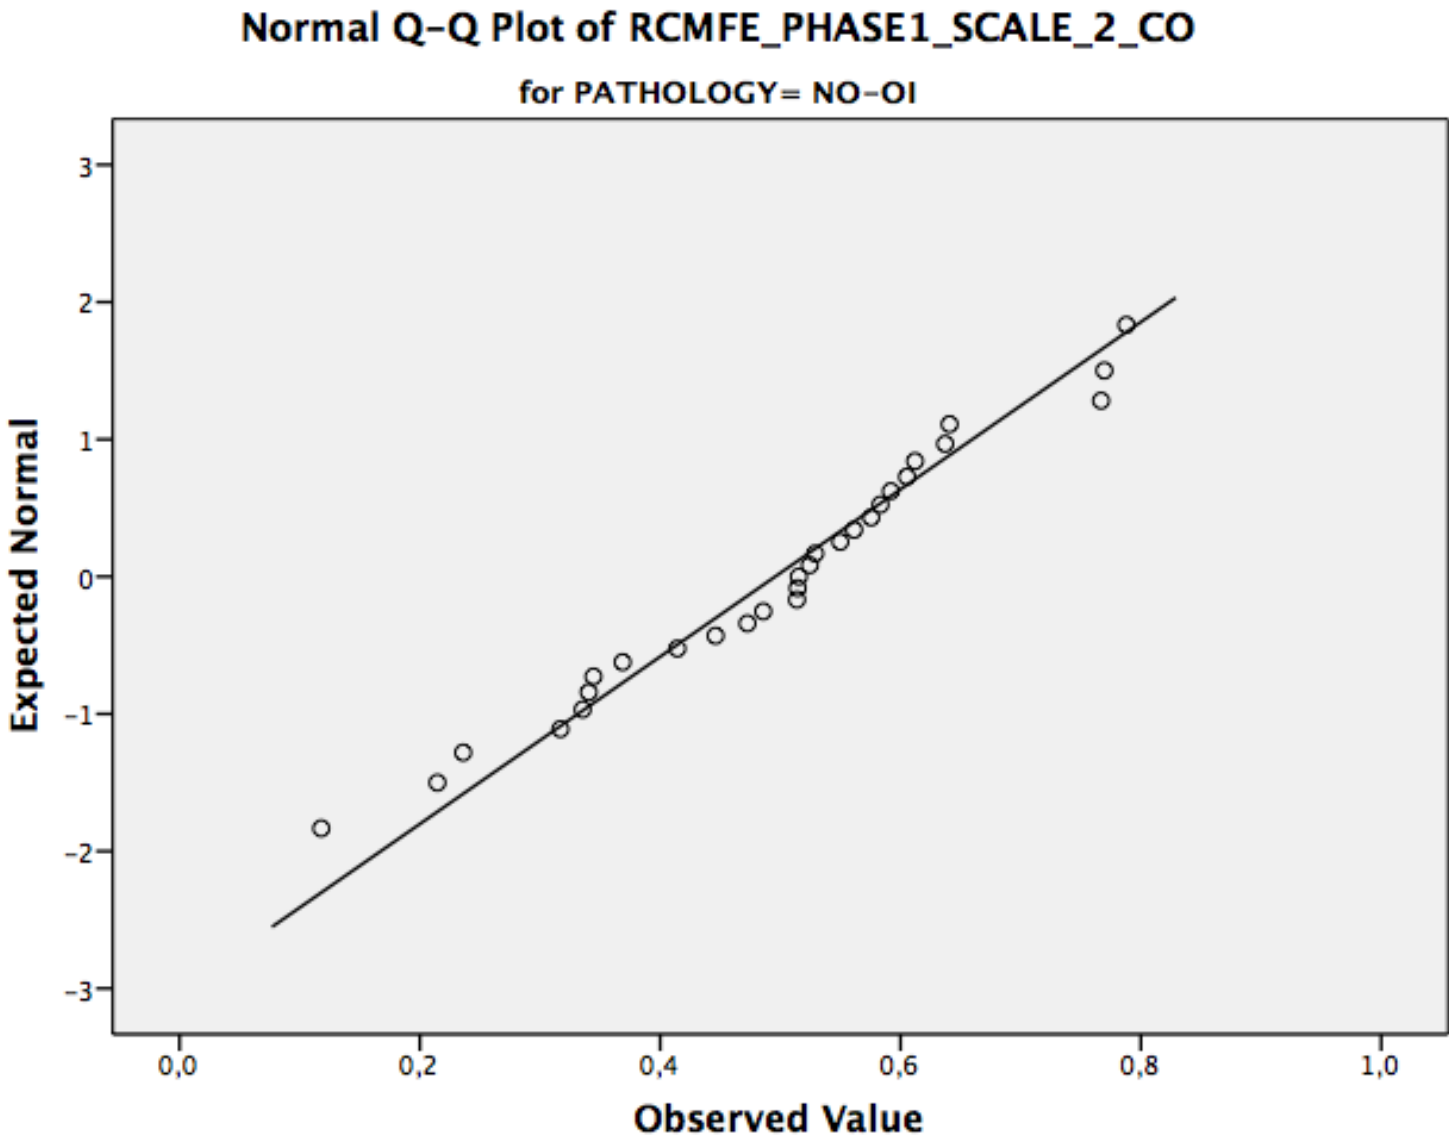

# Normal Q-Q Plot of RCMFE\_PHASE1\_SCALE\_2\_CO

for PATHOLOGY= OI

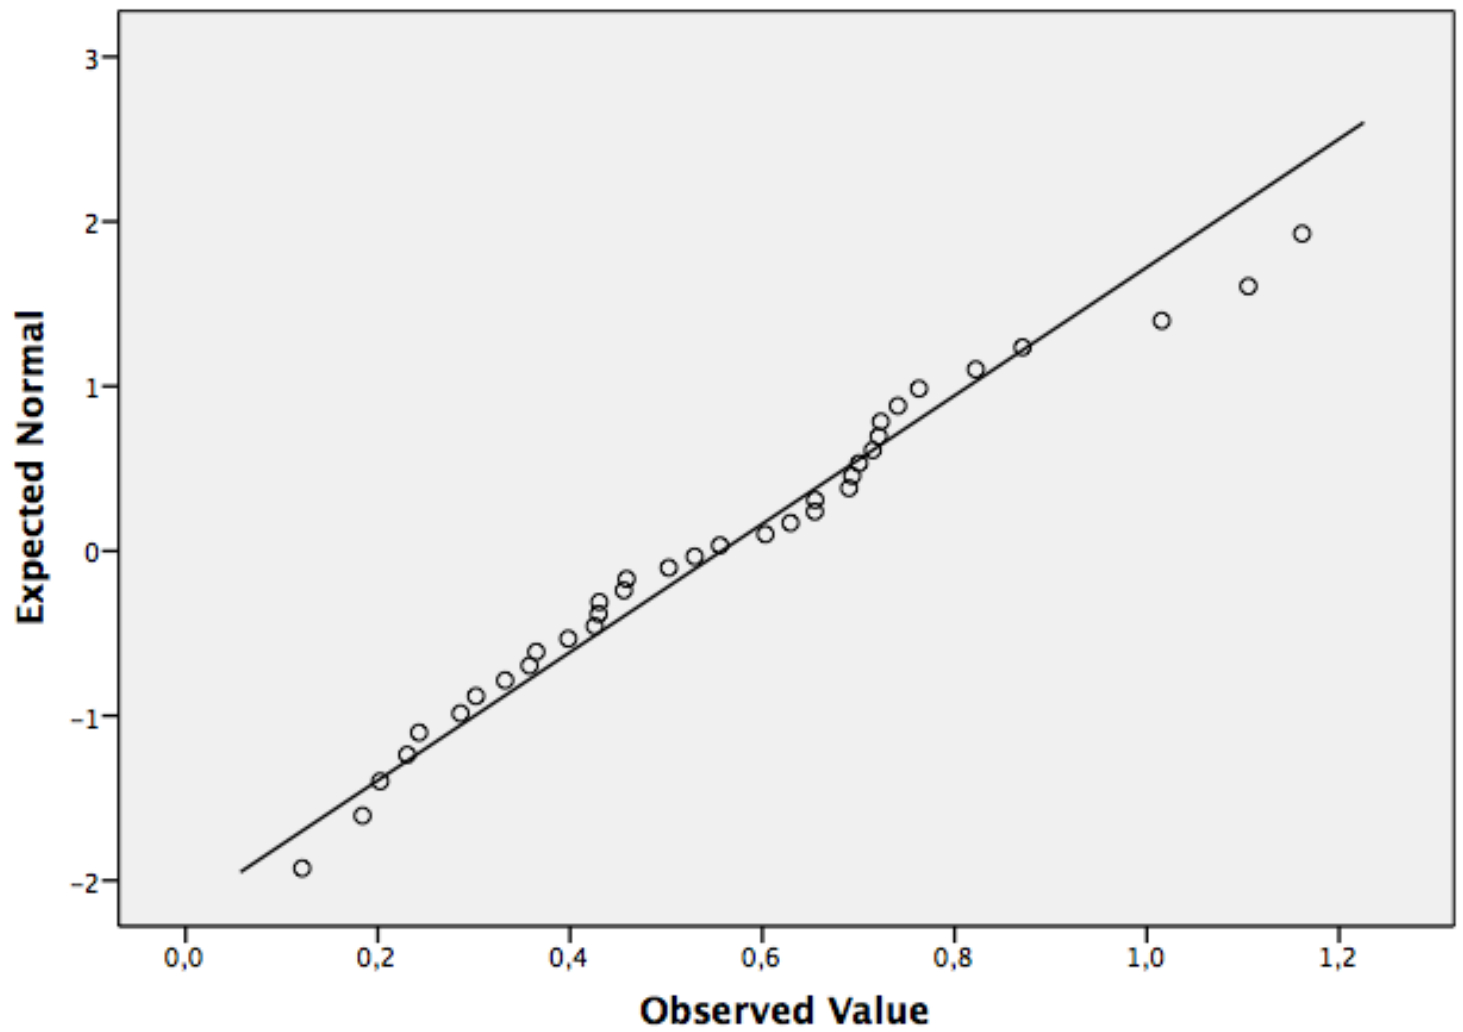



Normal Q-Q Plots

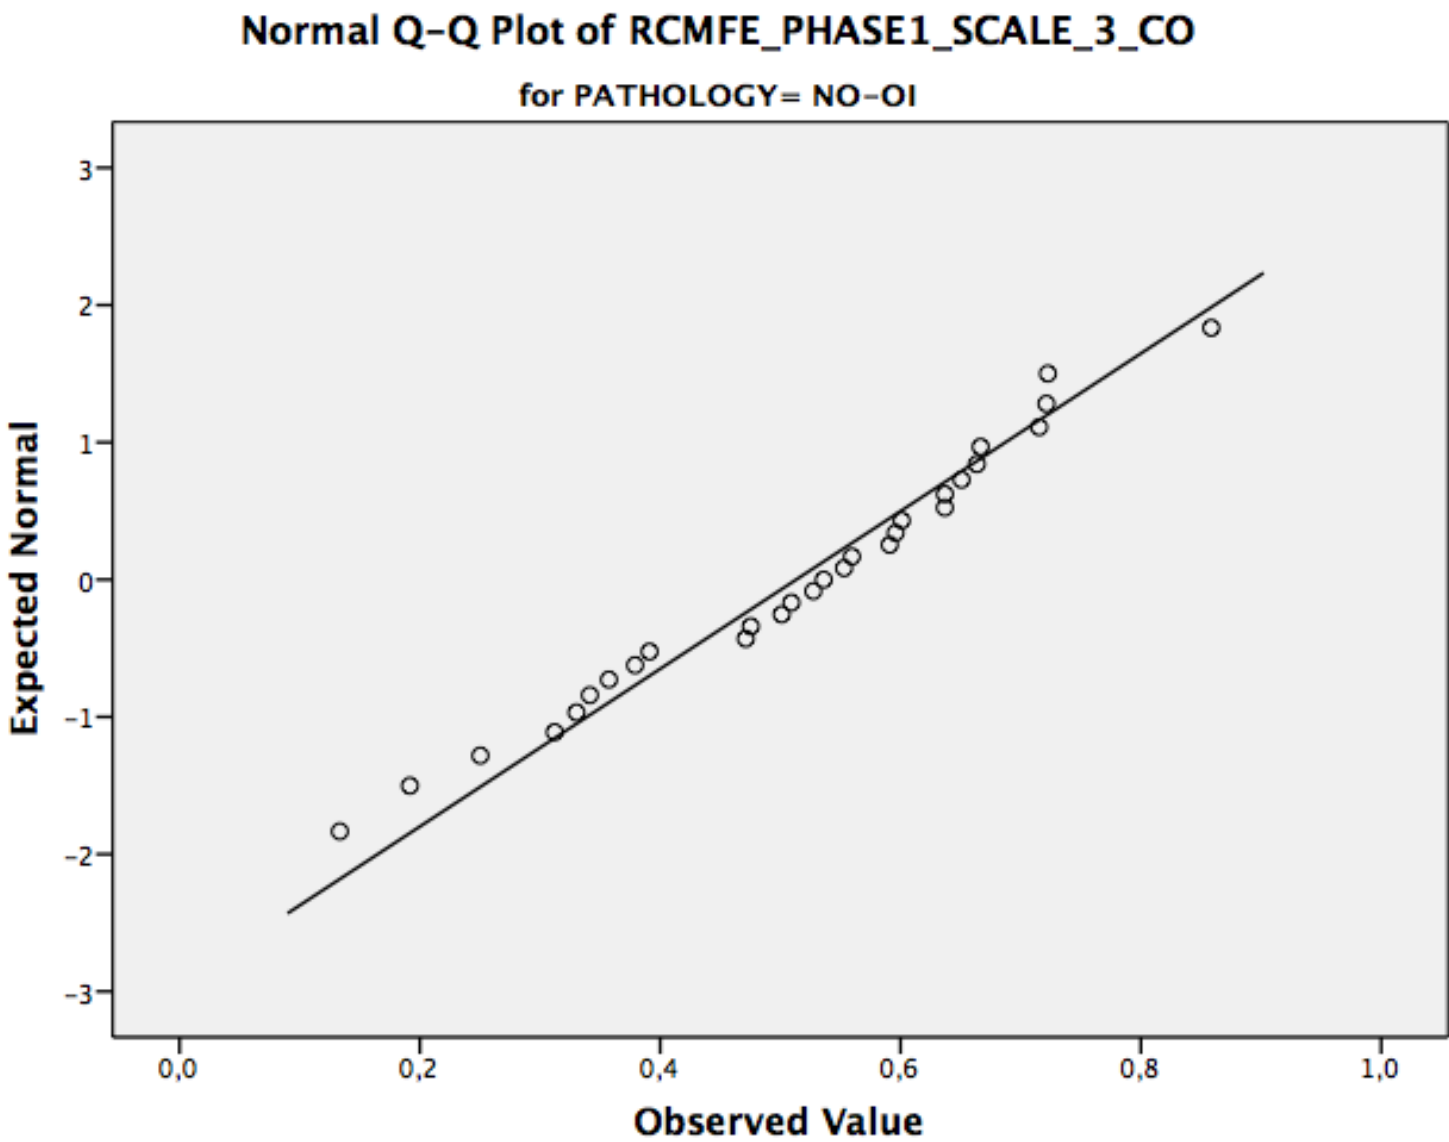

# Normal Q-Q Plot of RCMFE\_PHASE1\_SCALE\_3\_CO

for PATHOLOGY= OI

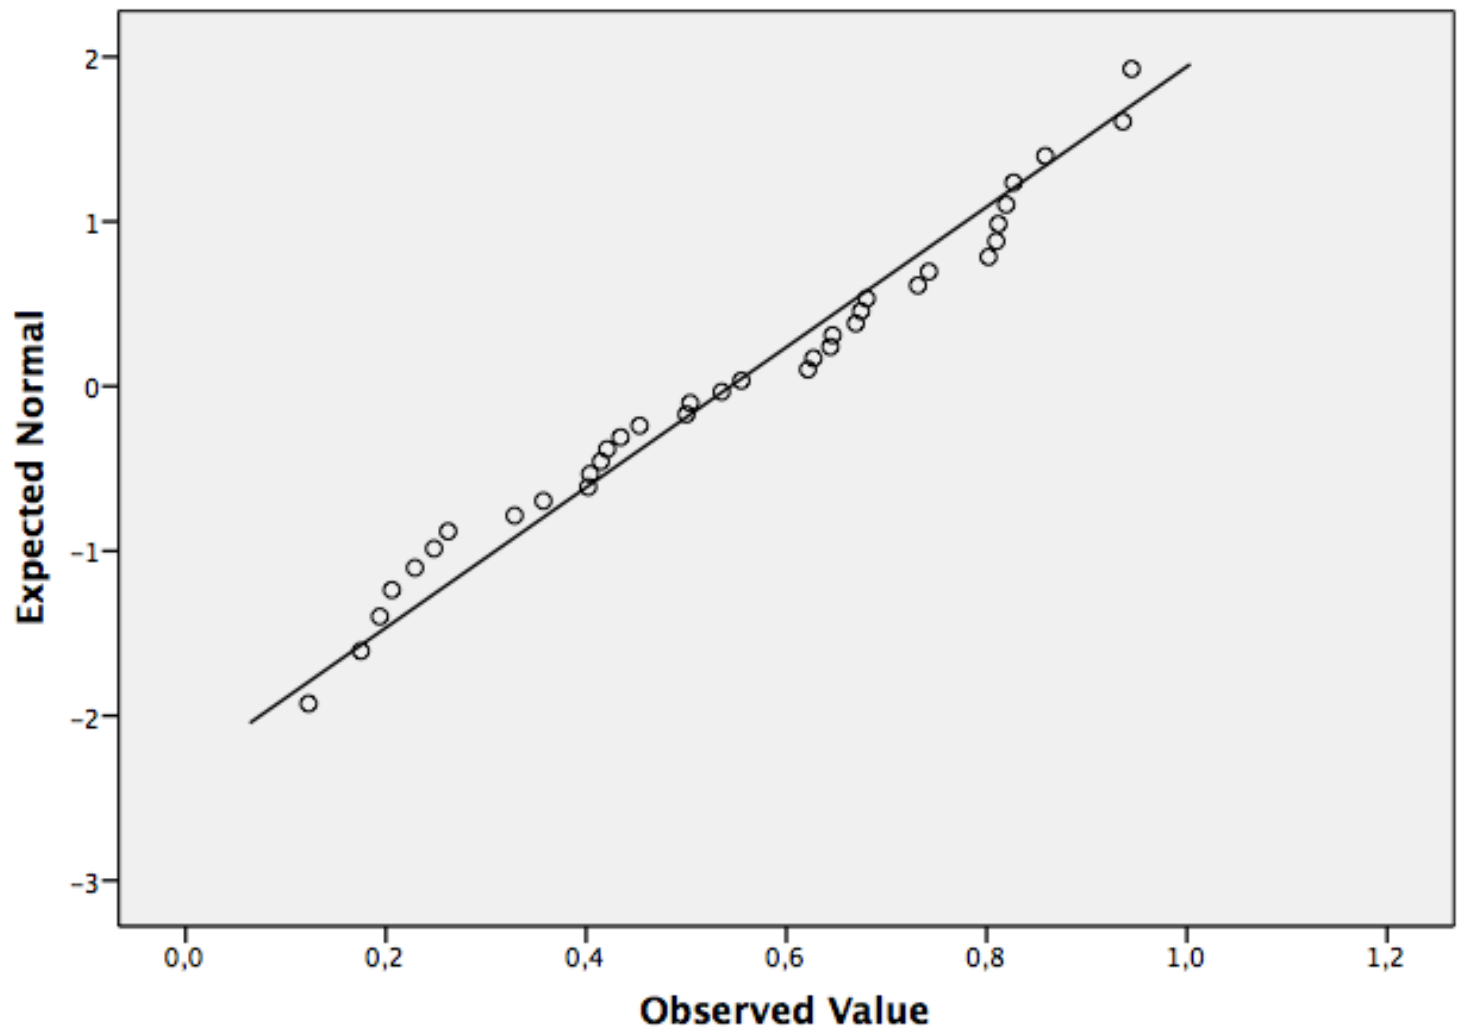

Normal Q-Q Plots

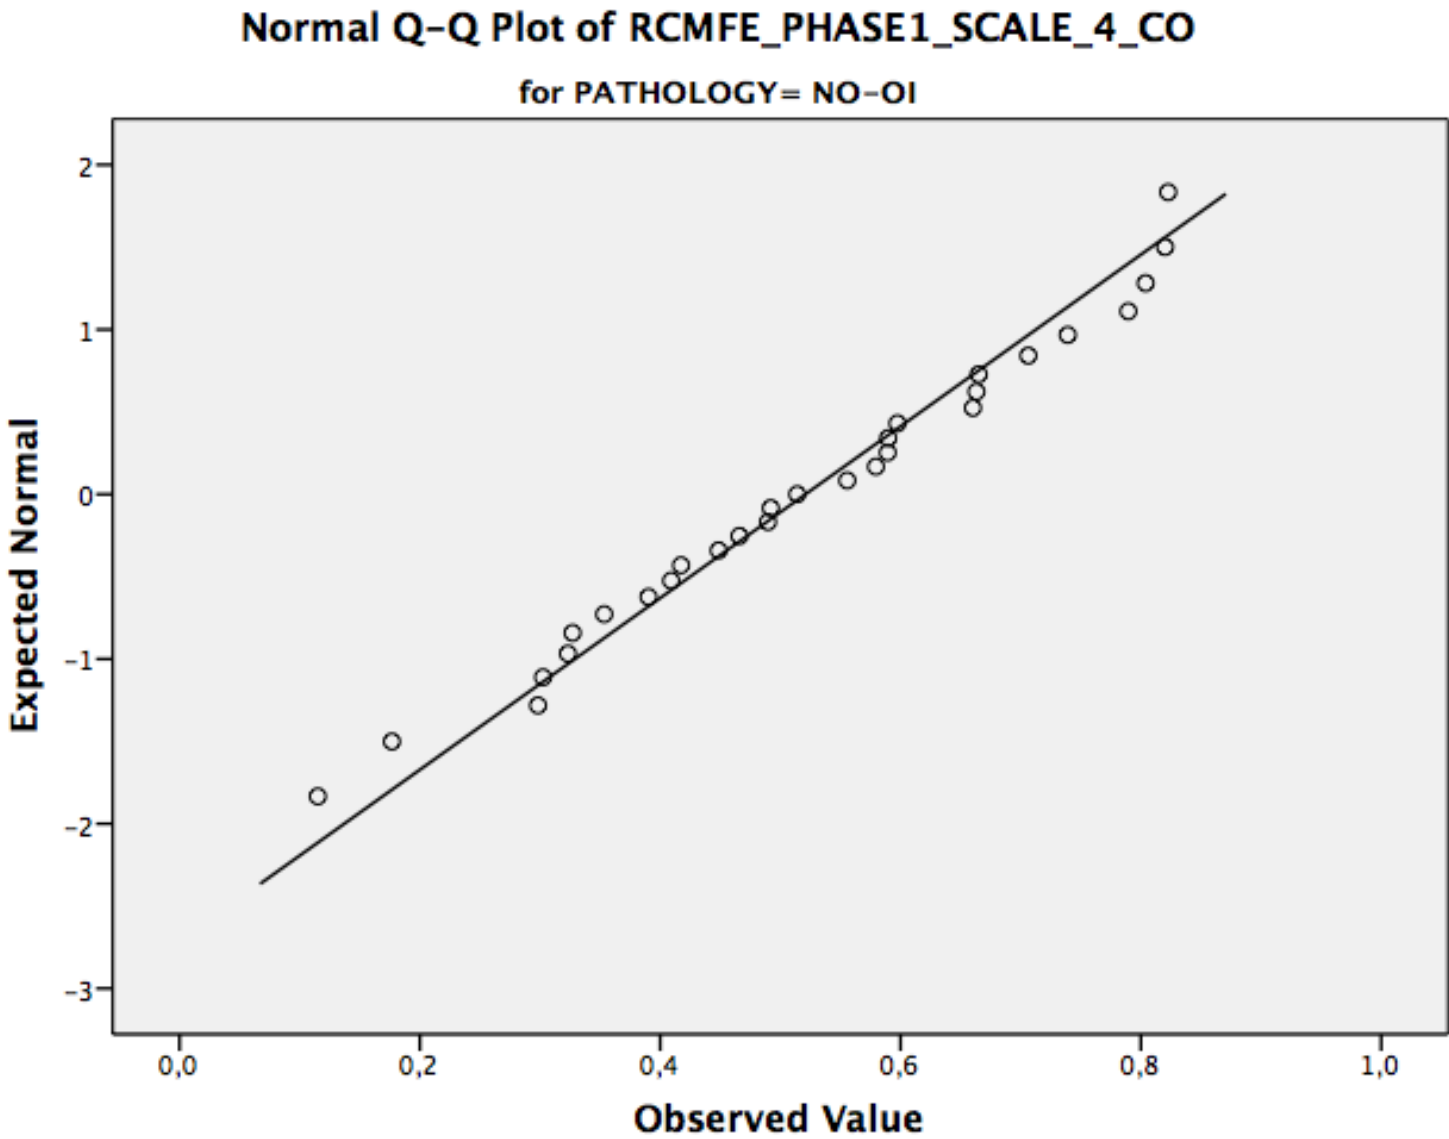

# Normal Q-Q Plot of RCMFE\_PHASE1\_SCALE\_4\_CO

for PATHOLOGY= OI

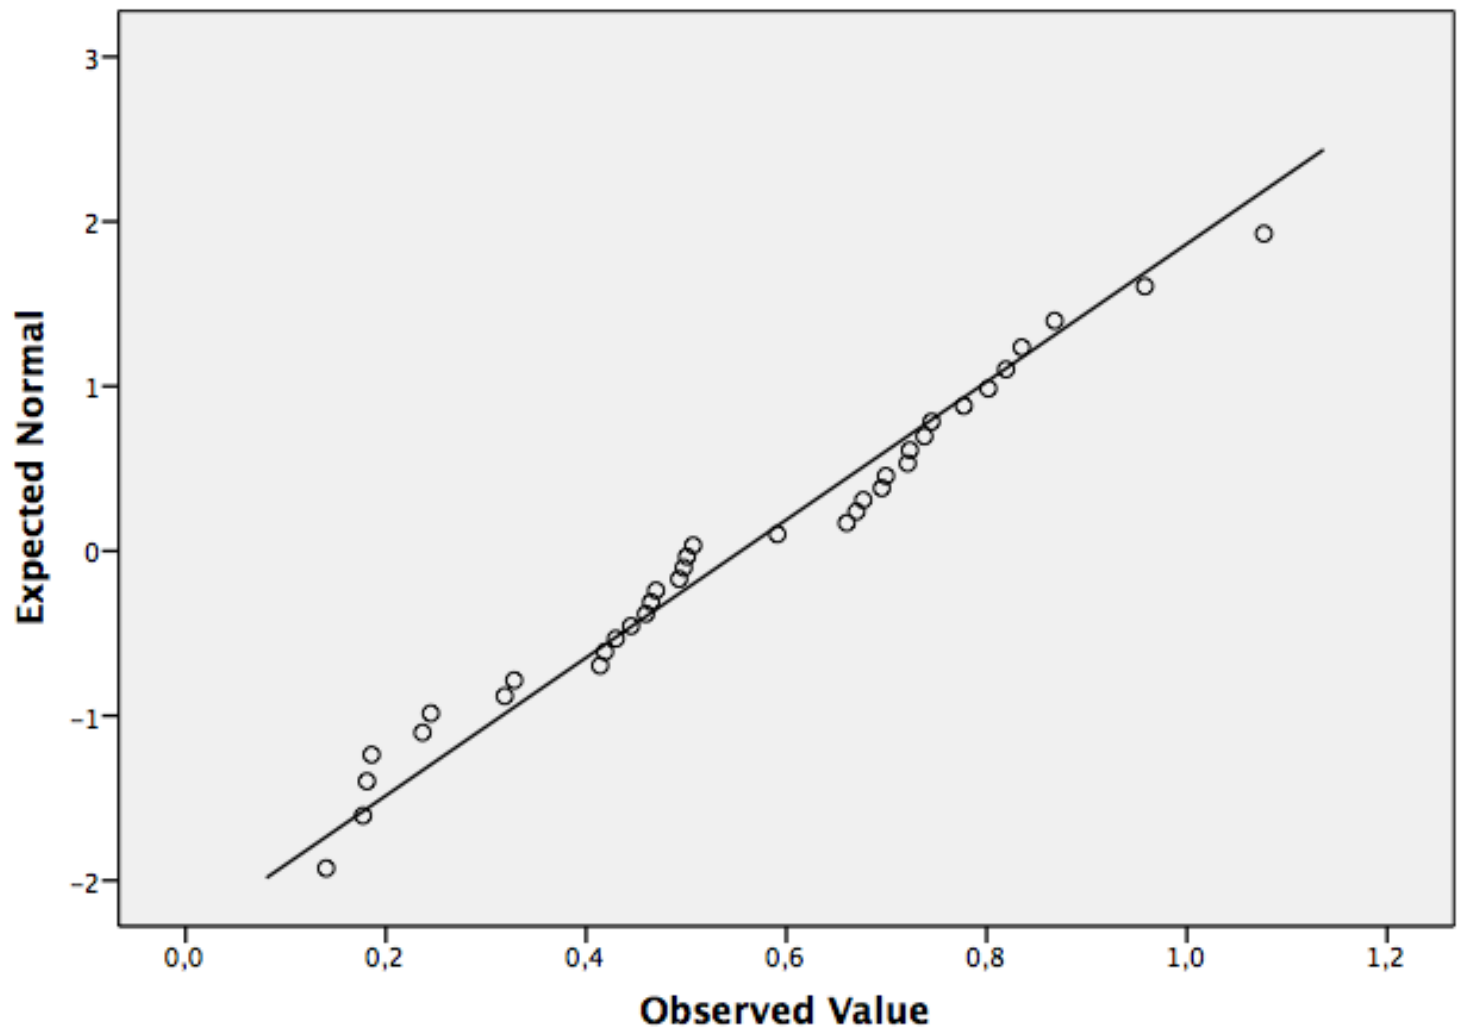

Normal Q-Q Plots

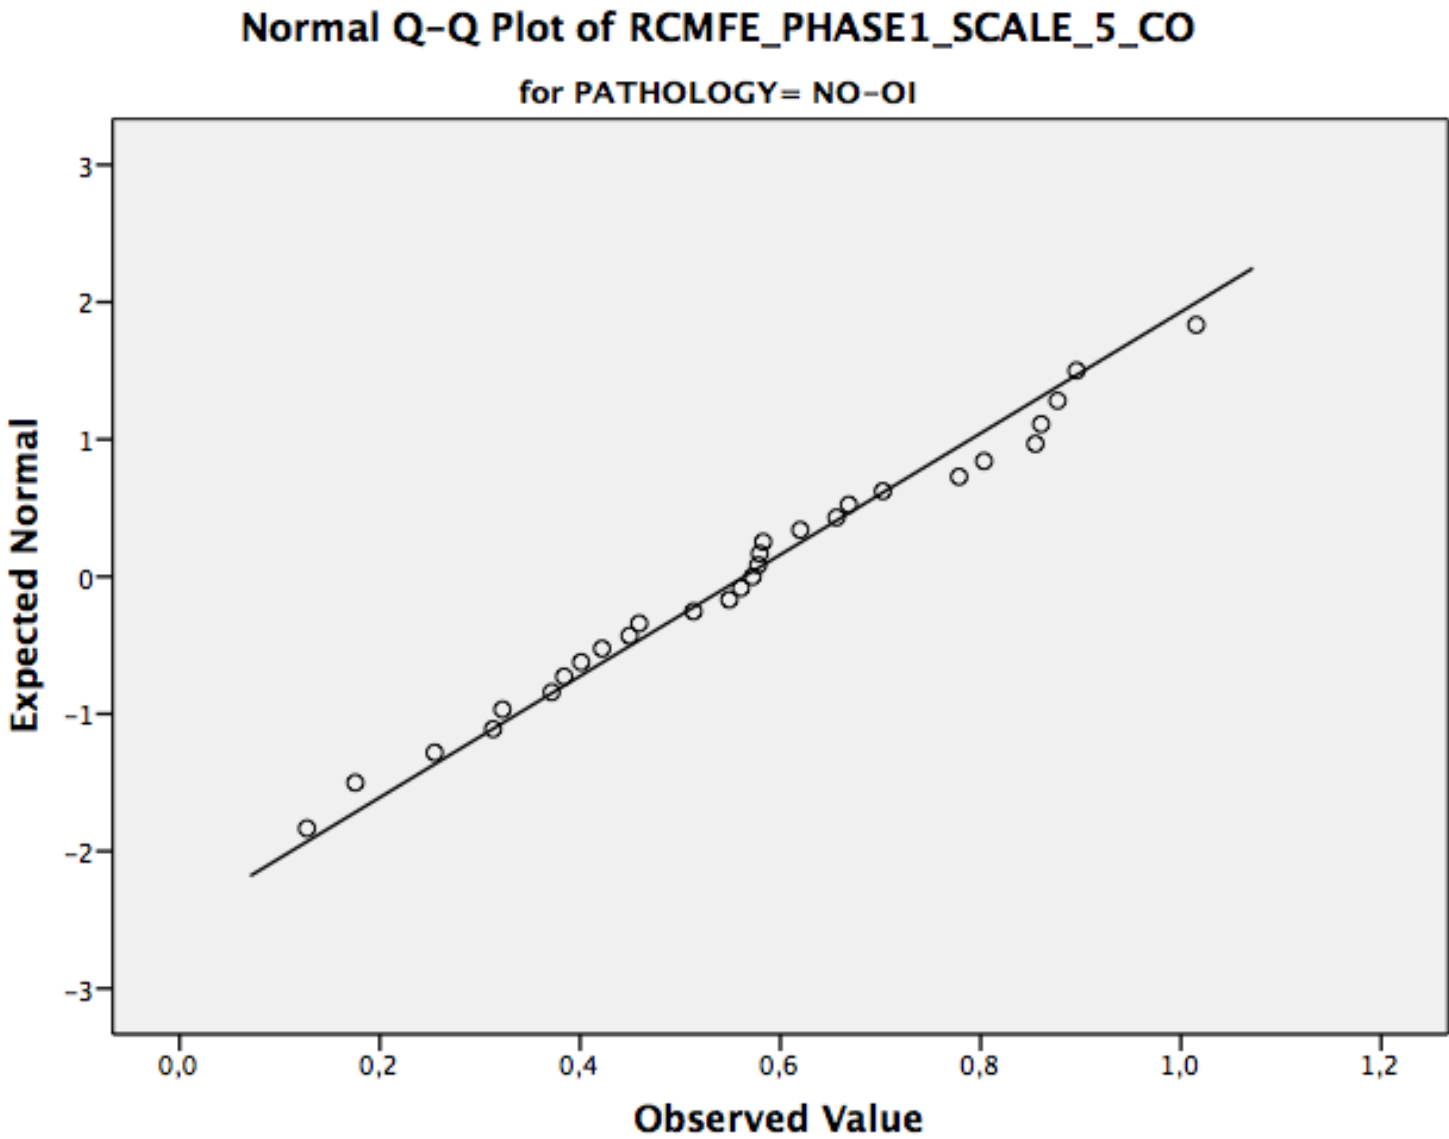

# Normal Q-Q Plot of RCMFE\_PHASE1\_SCALE\_5\_CO

for PATHOLOGY= OI

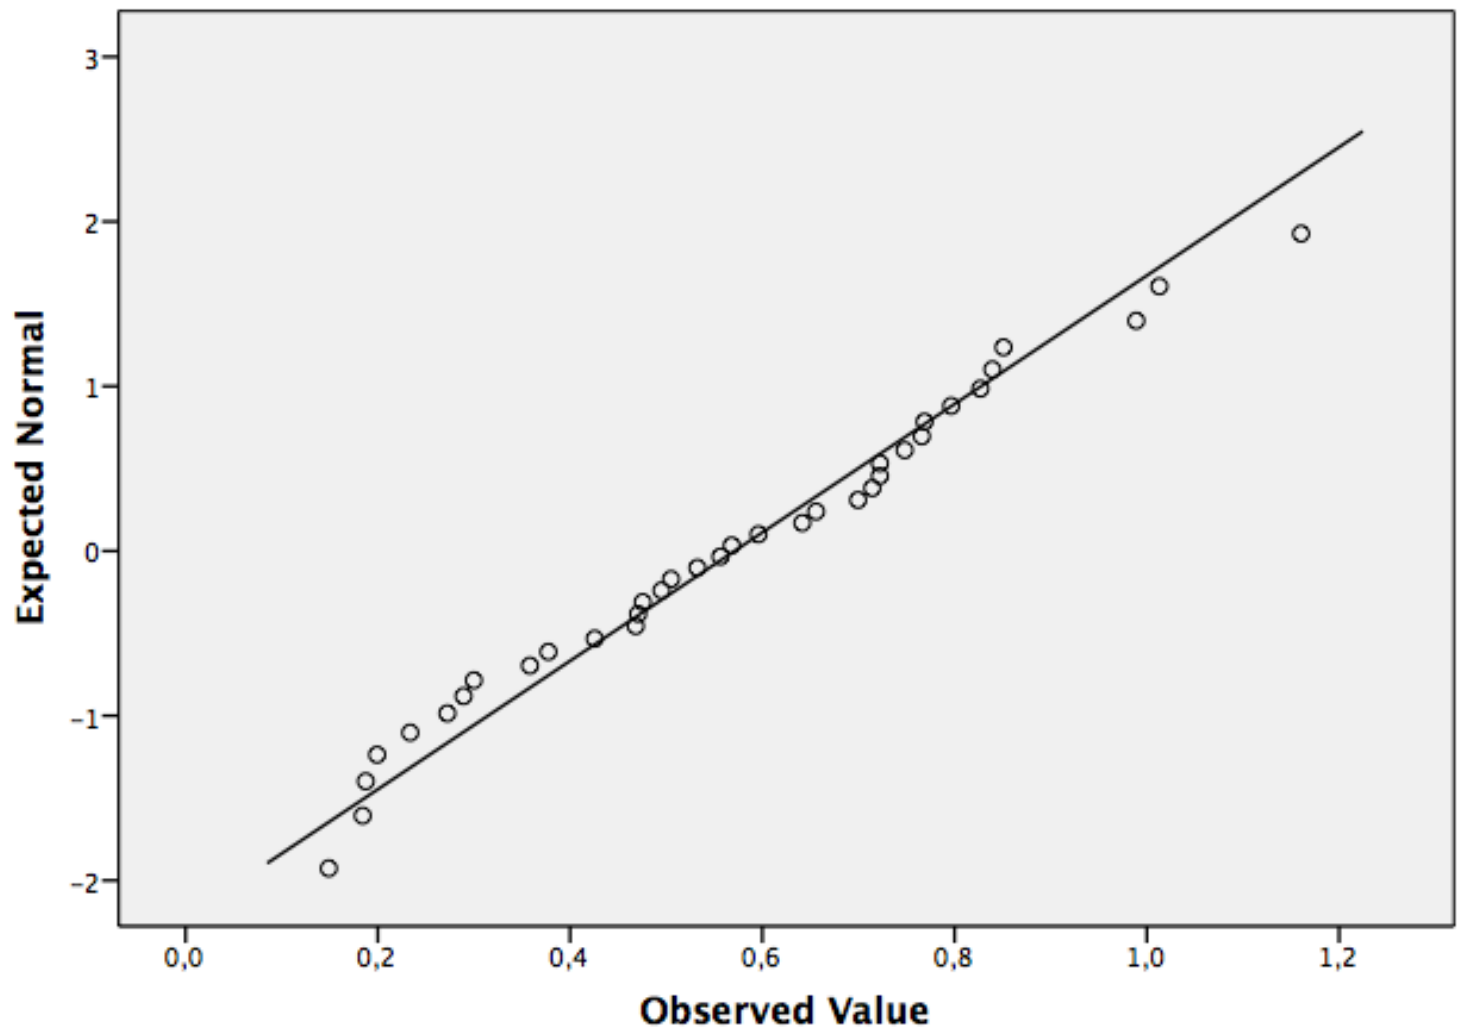

Normal Q-Q Plots

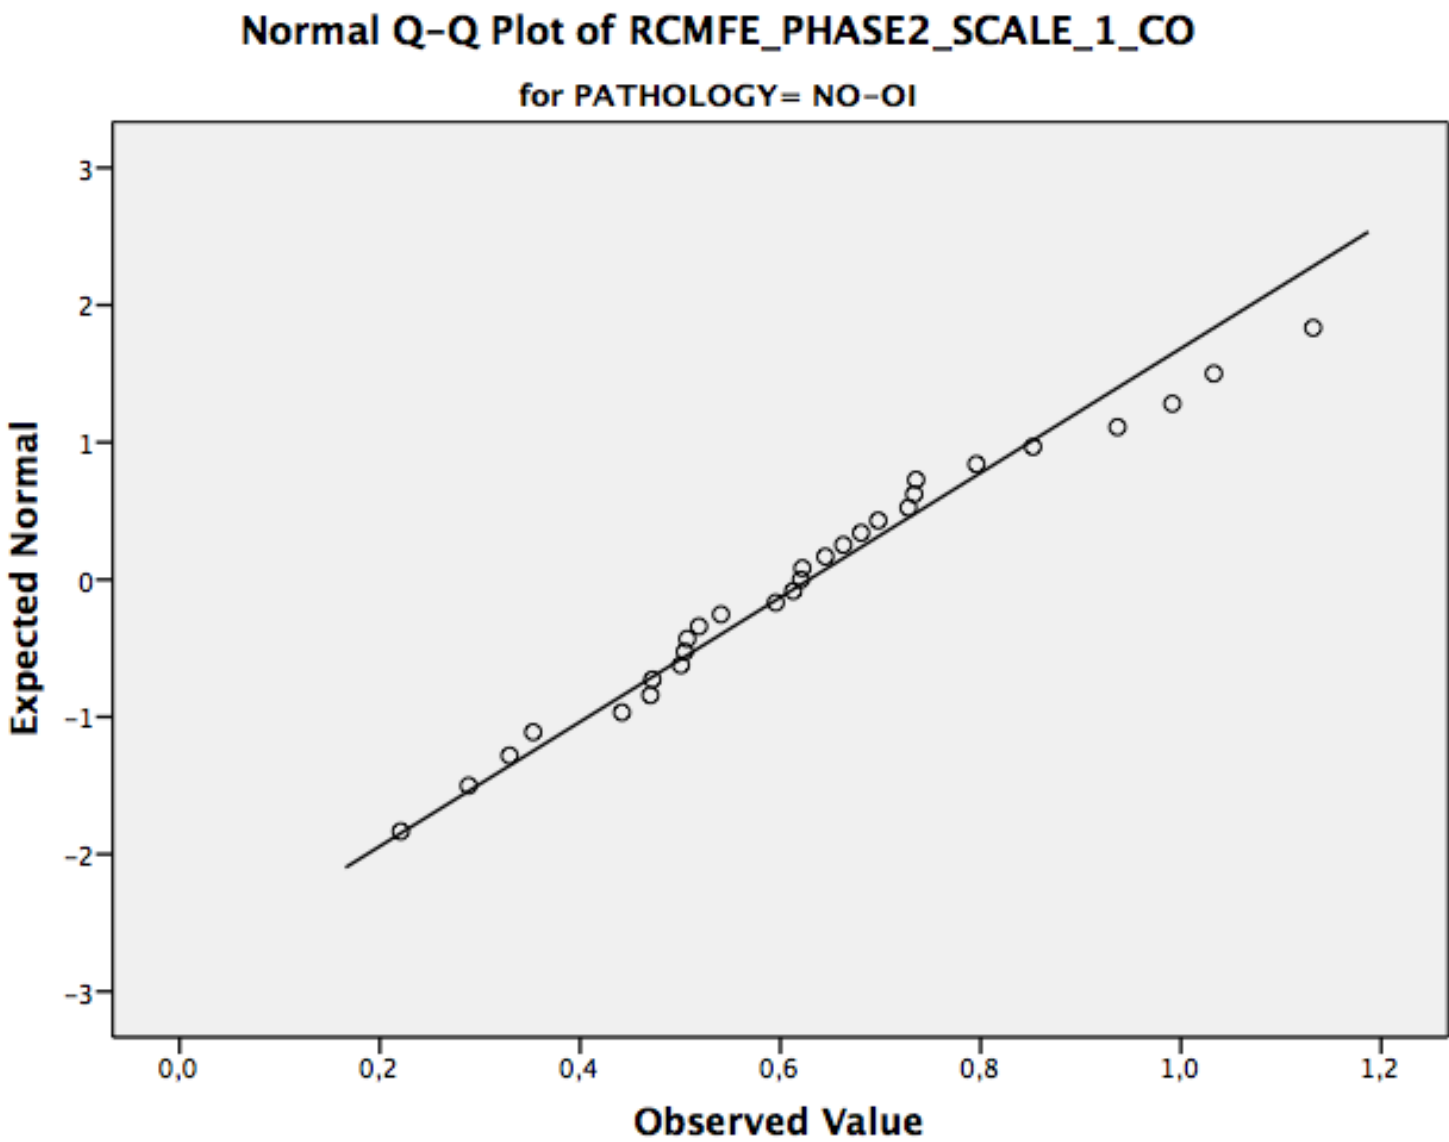

# Normal Q-Q Plot of RCMFE\_PHASE2\_SCALE\_1\_CO

for PATHOLOGY= OI

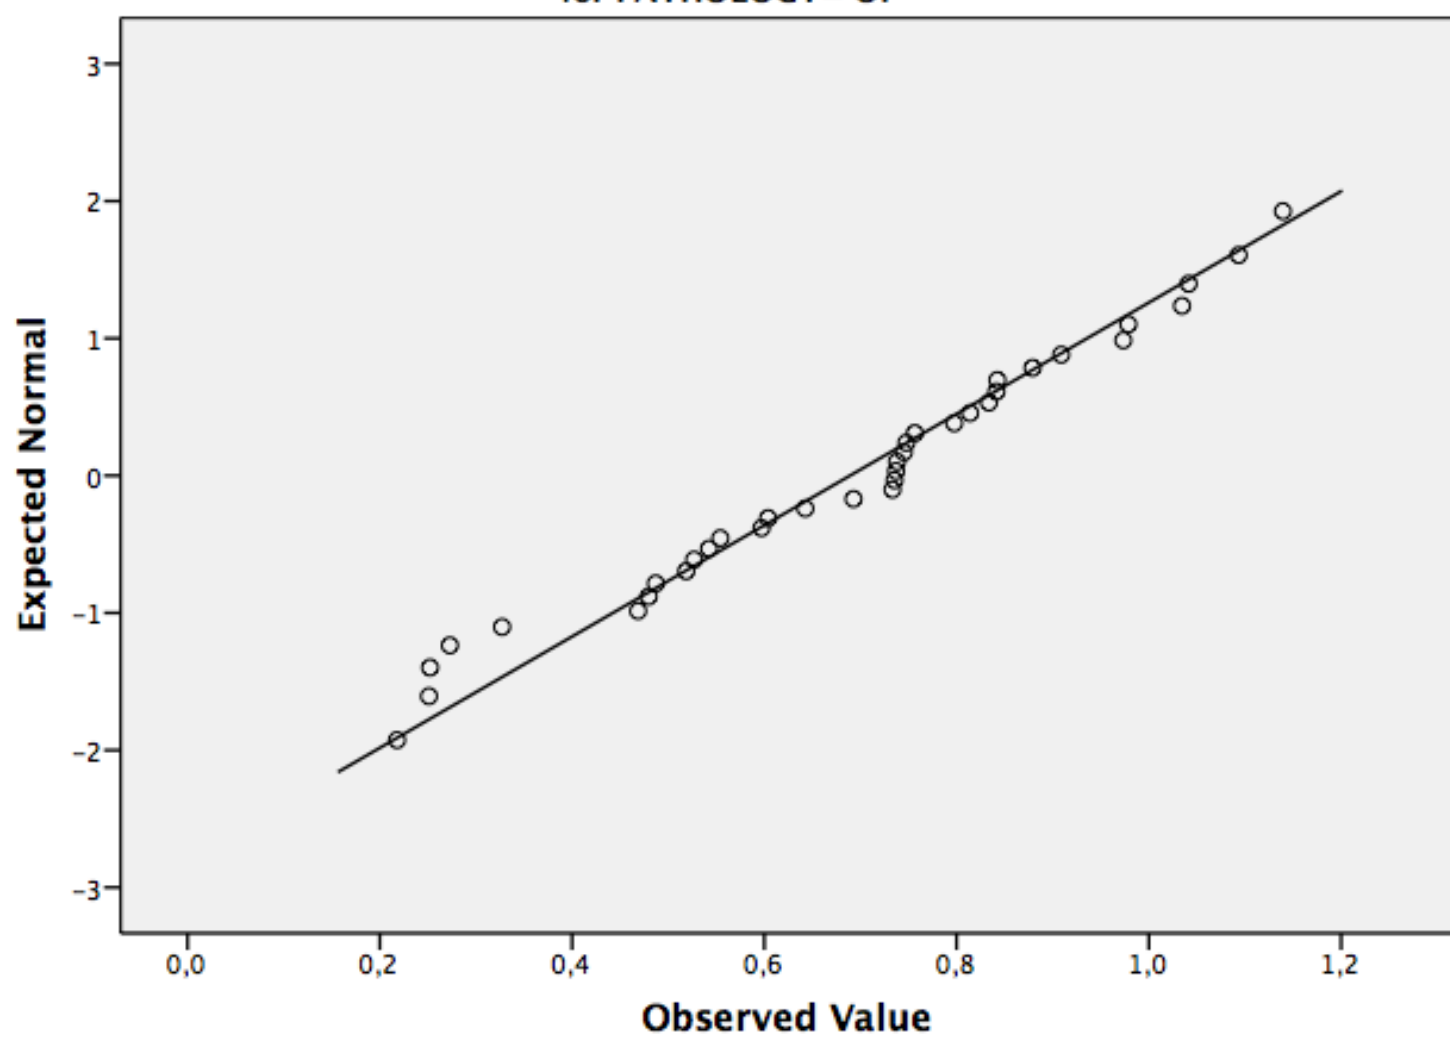



Normal Q-Q Plots

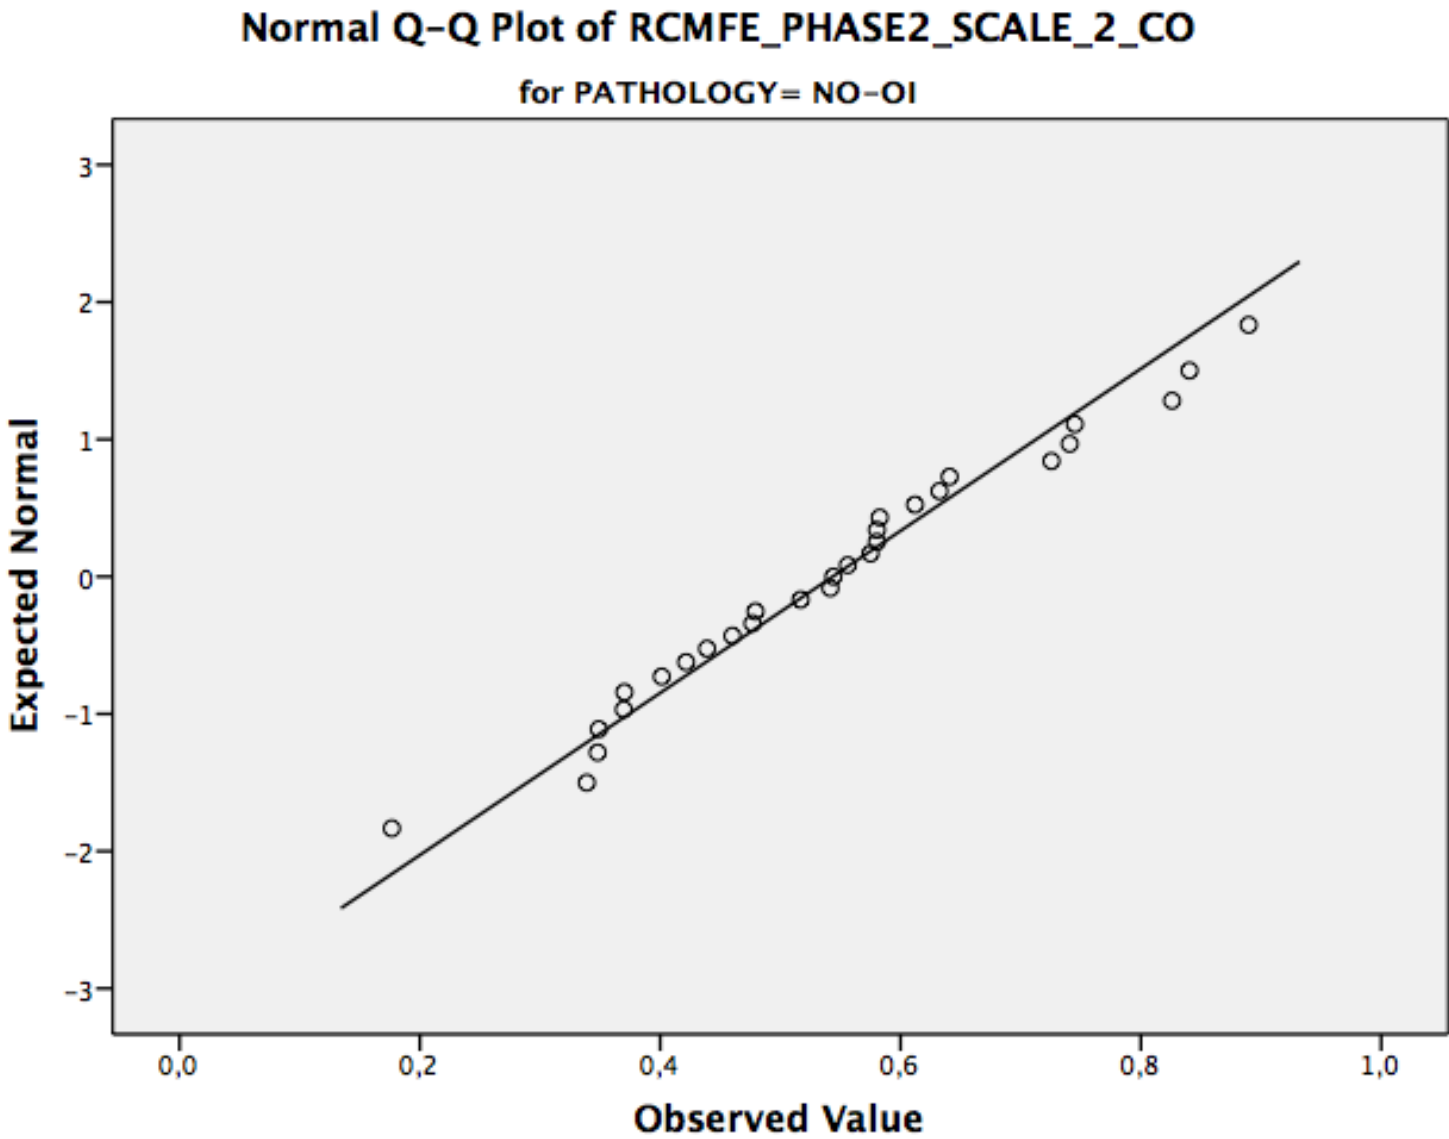

# Normal Q-Q Plot of RCMFE\_PHASE2\_SCALE\_2\_CO

for PATHOLOGY= OI

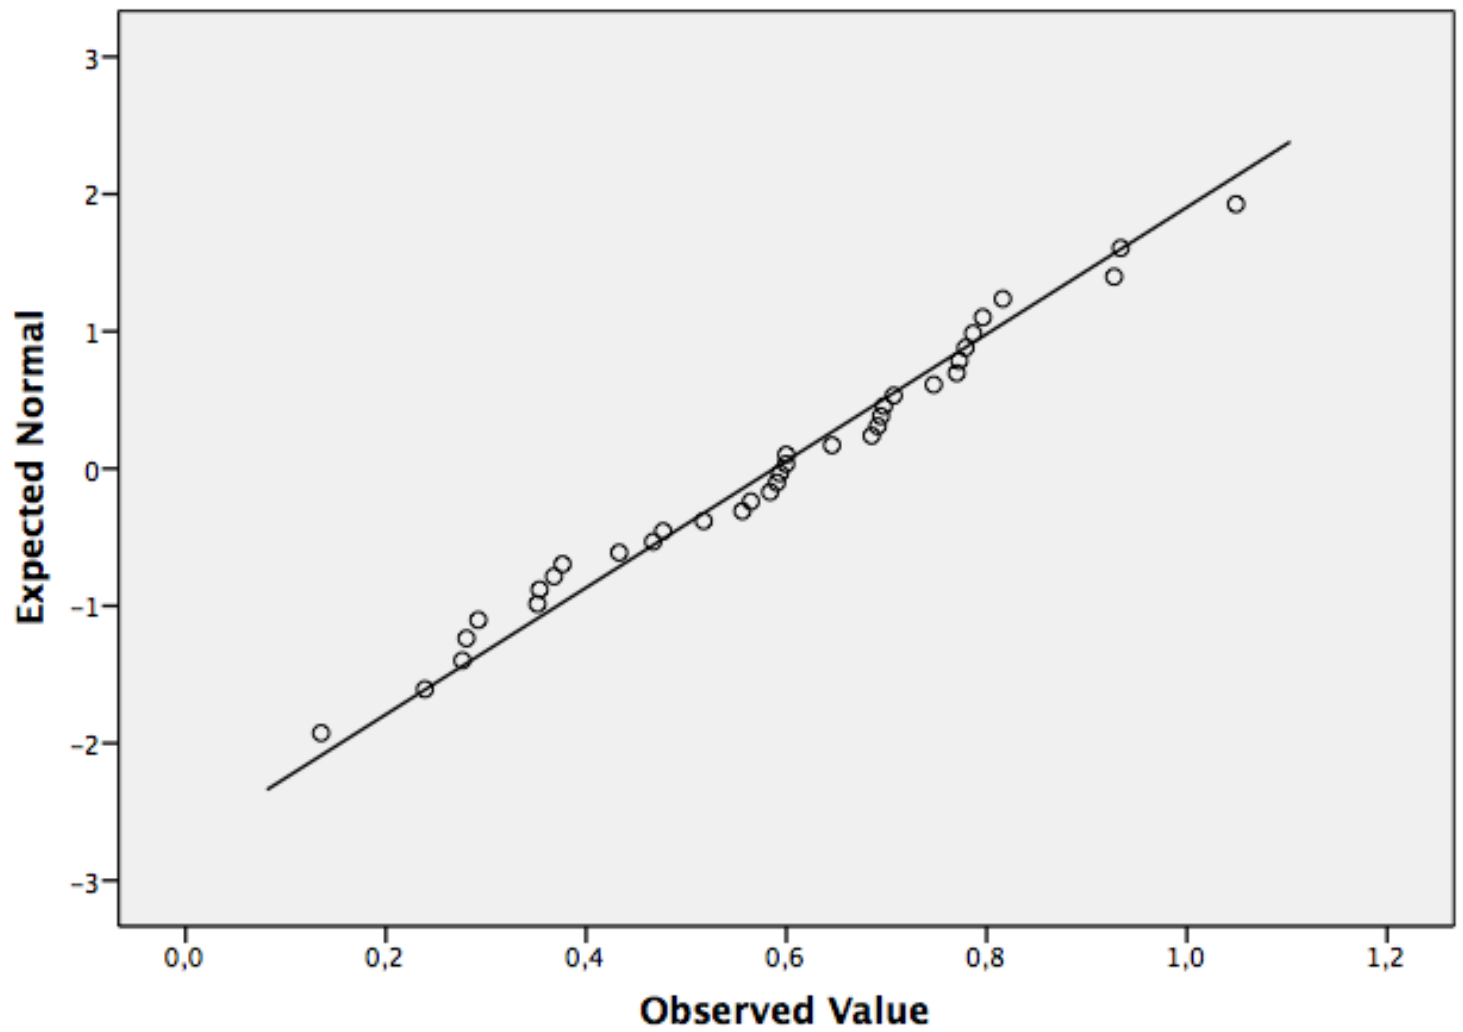

Normal Q-Q Plots

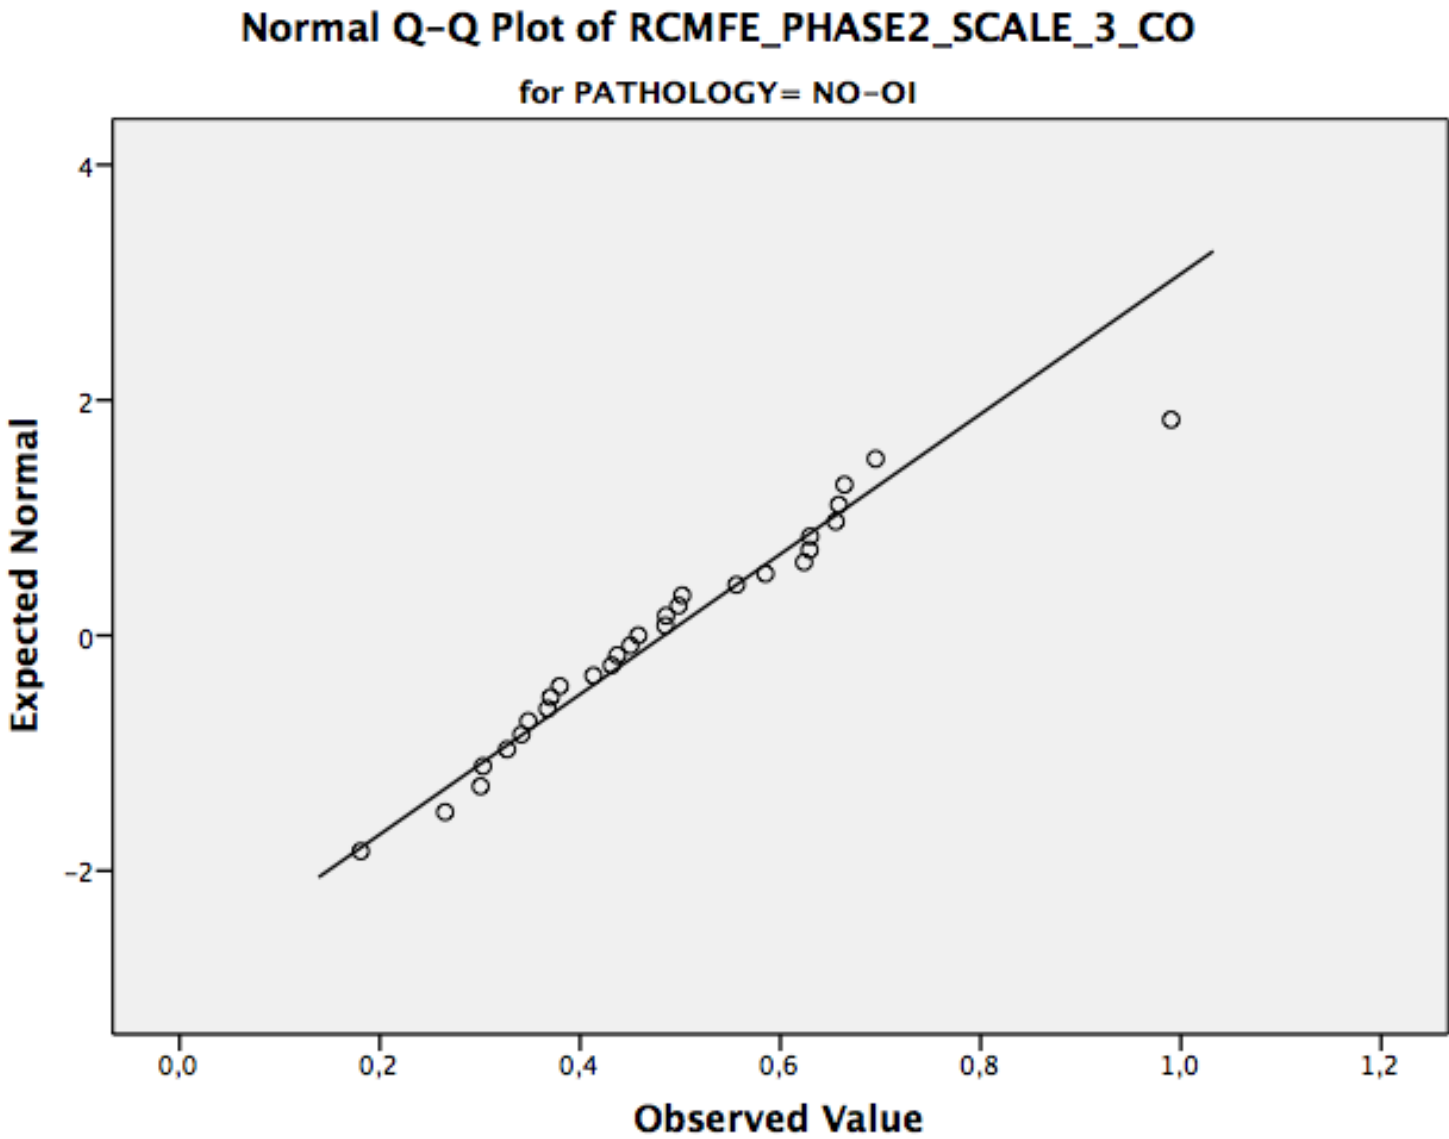

# Normal Q-Q Plot of RCMFE\_PHASE2\_SCALE\_3\_CO

for PATHOLOGY= OI

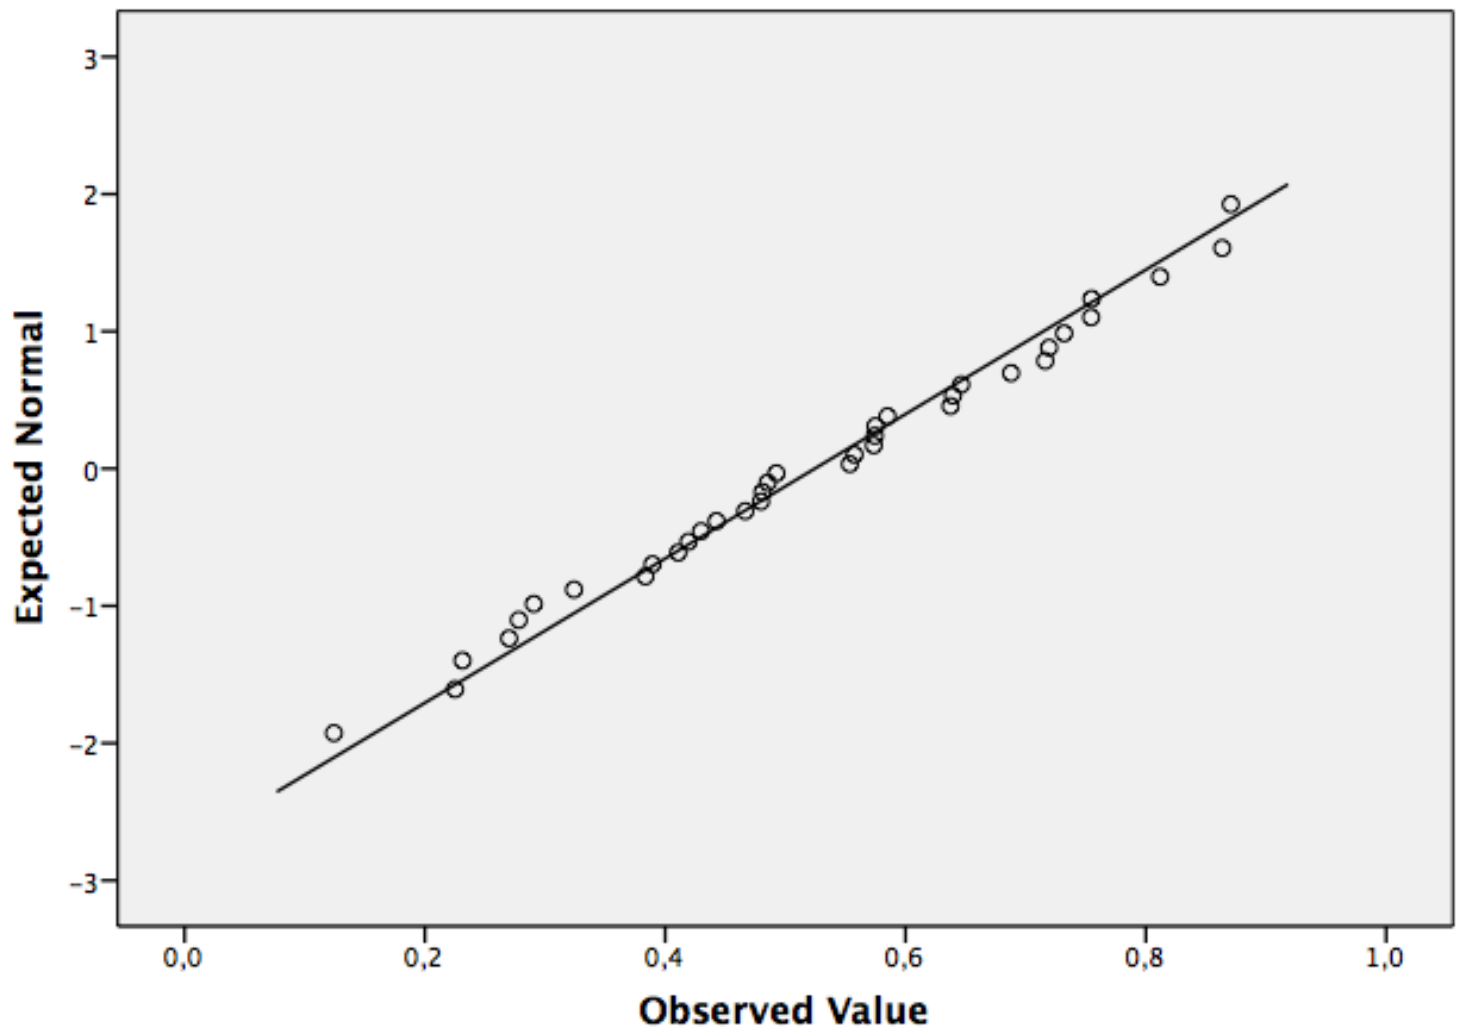

Normal Q-Q Plots

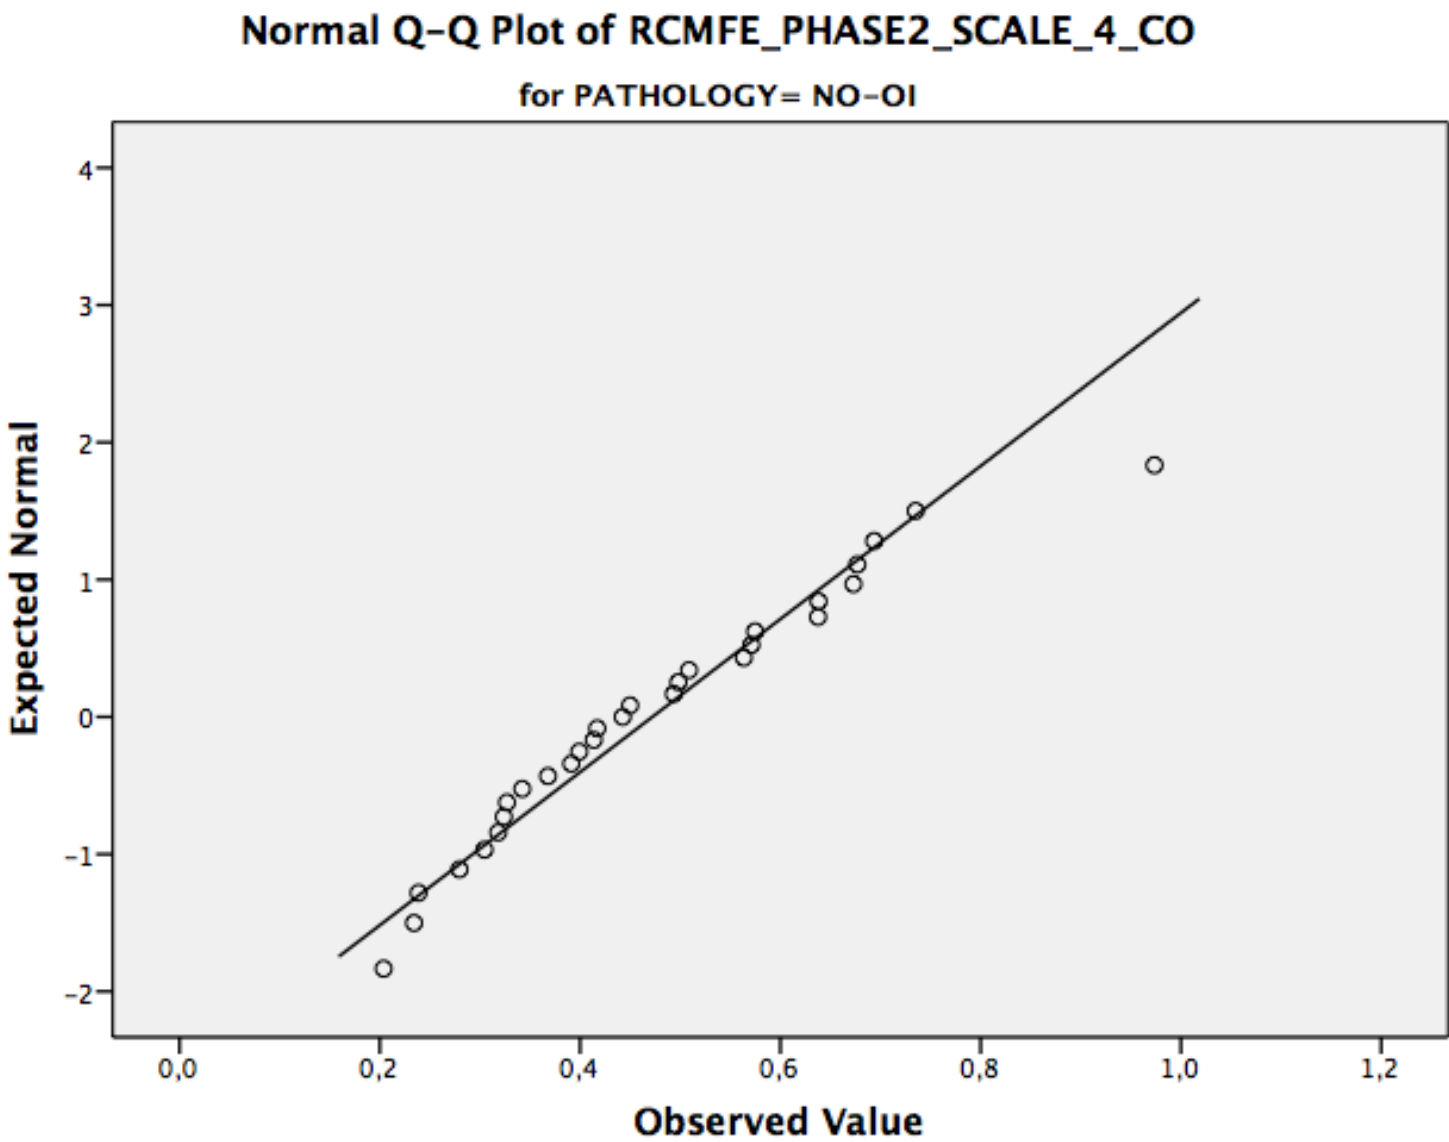

# Normal Q-Q Plot of RCMFE\_PHASE2\_SCALE\_4\_CO

for PATHOLOGY= OI

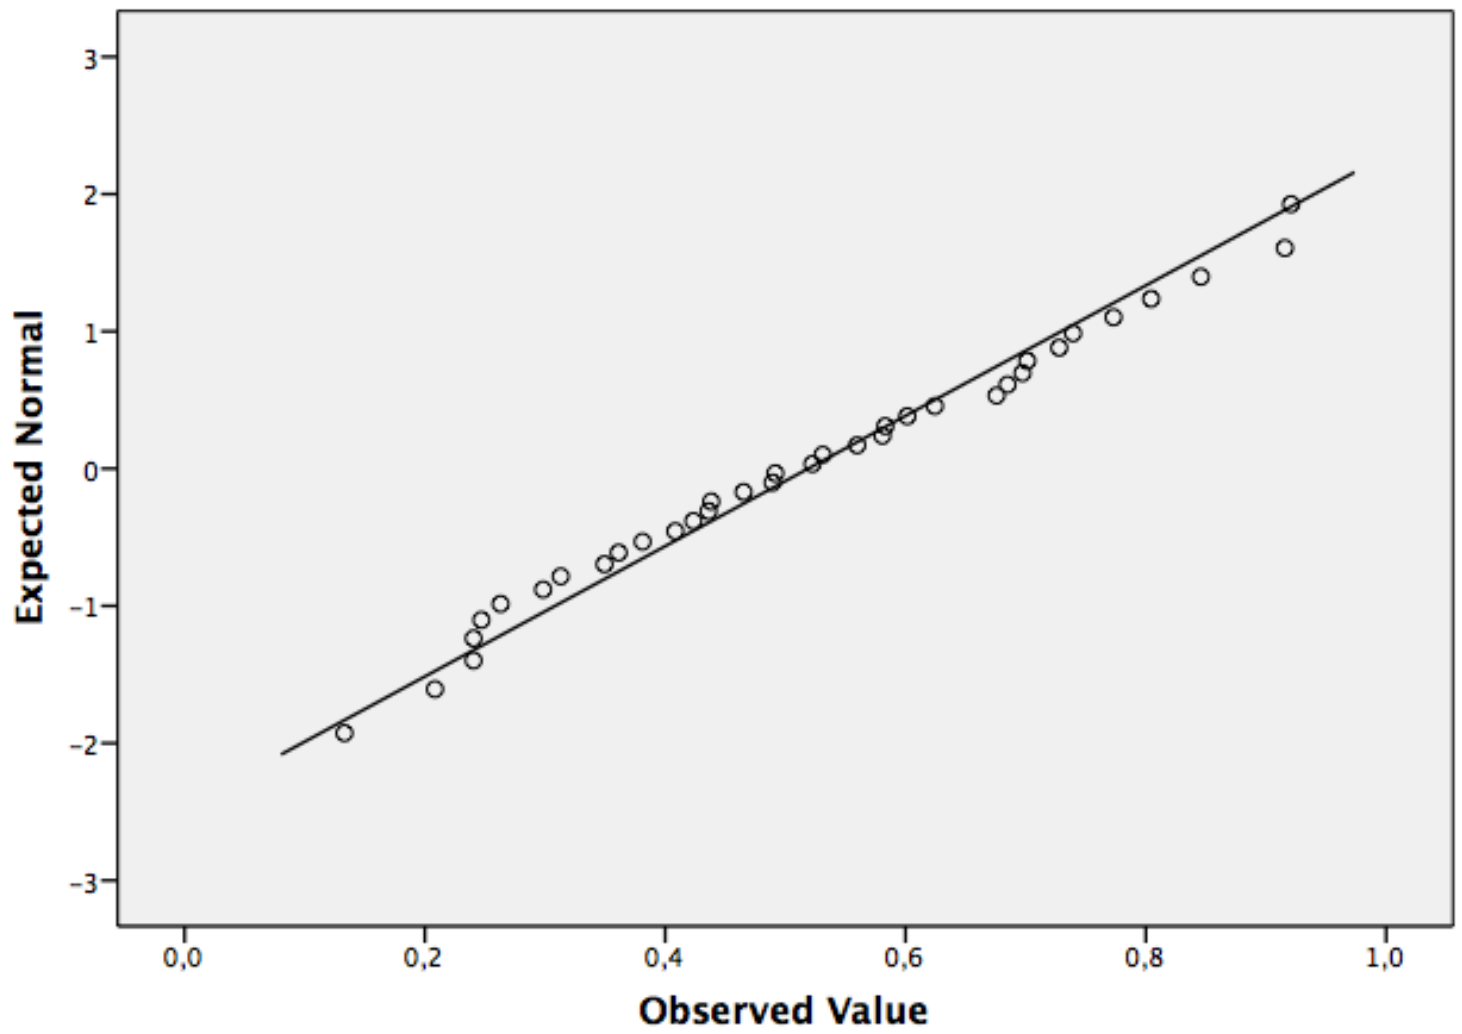

Normal Q-Q Plots

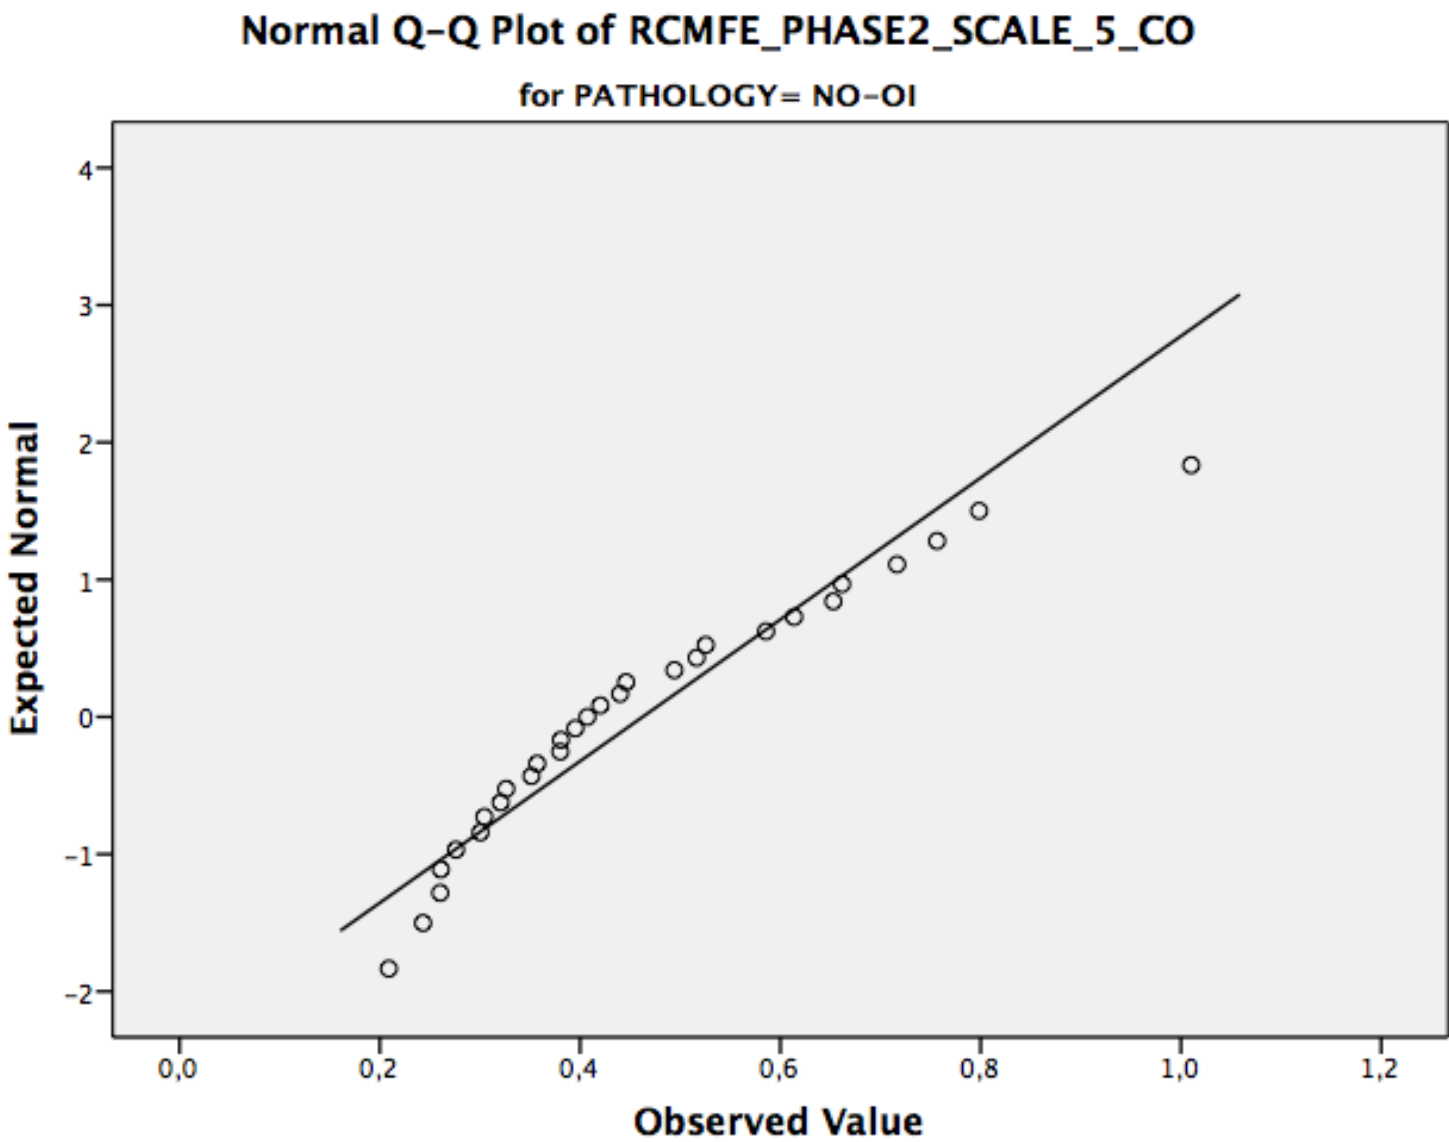

# Normal Q-Q Plot of RCMFE\_PHASE2\_SCALE\_5\_CO

for PATHOLOGY= OI

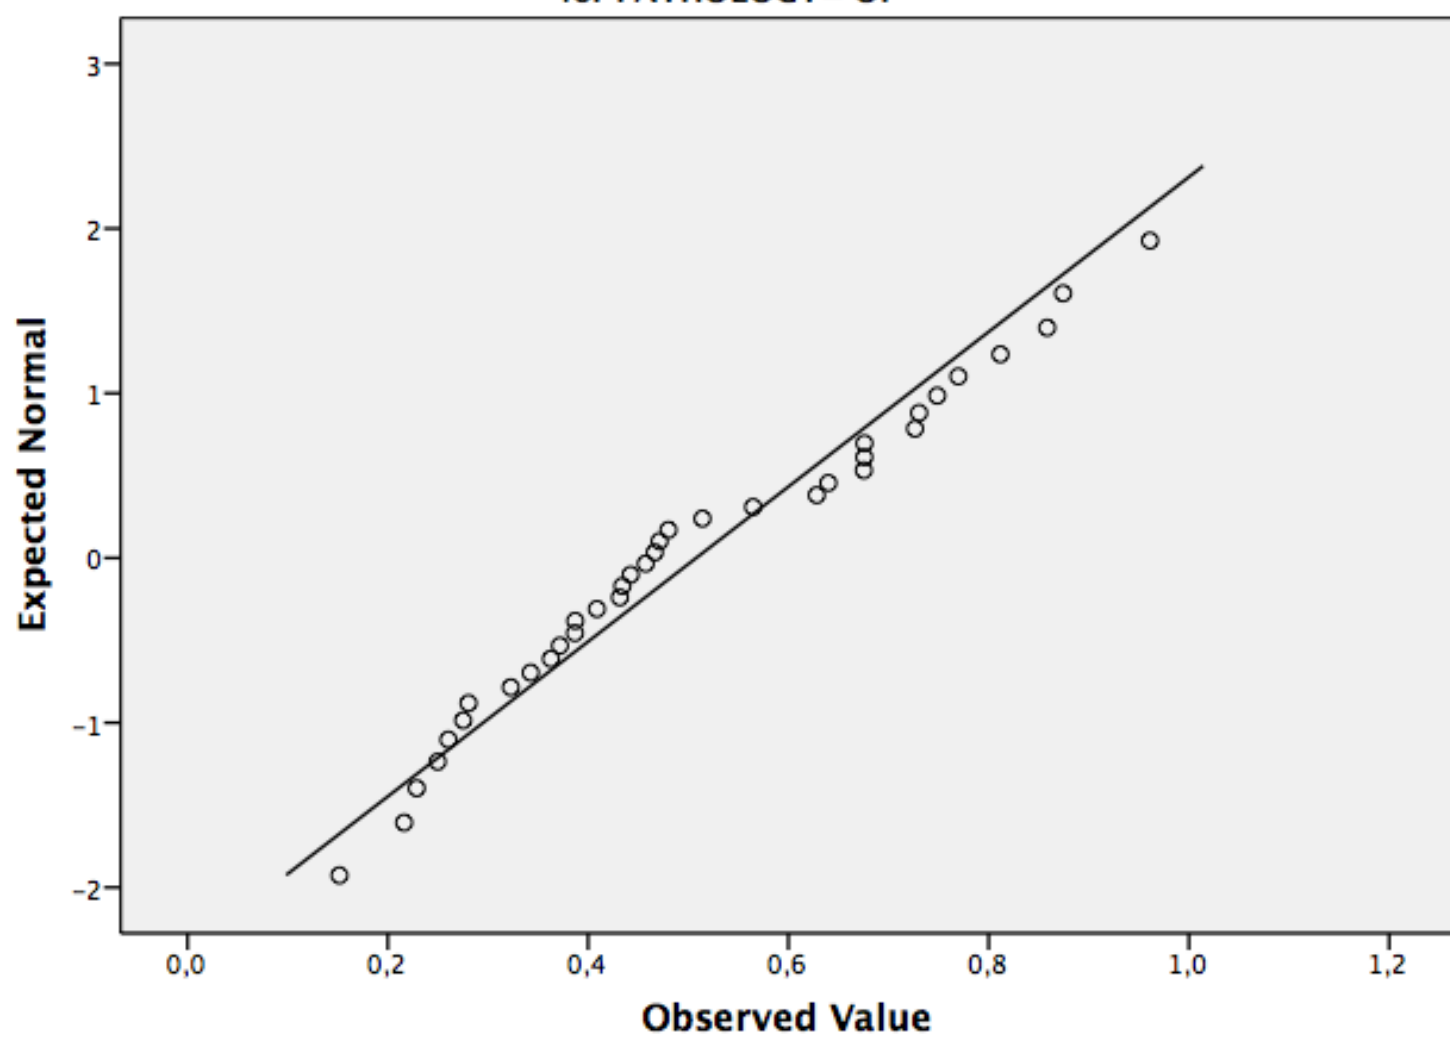



Normal Q-Q Plots

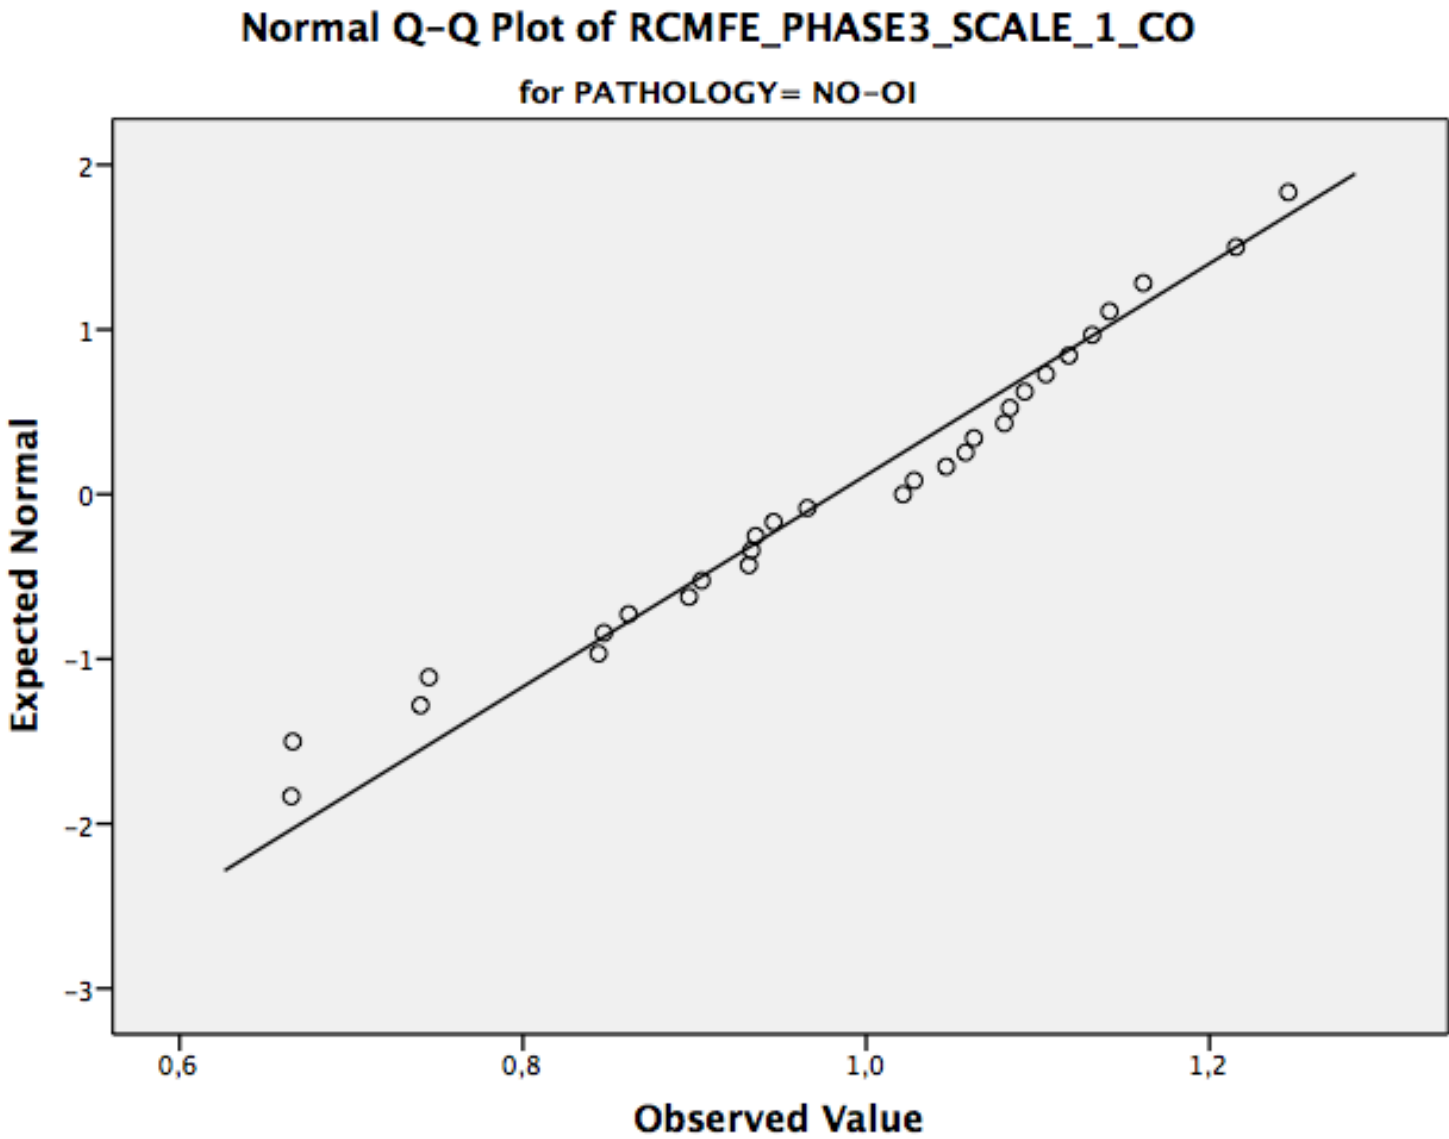

# Normal Q-Q Plot of RCMFE\_PHASE3\_SCALE\_1\_CO

for PATHOLOGY= OI

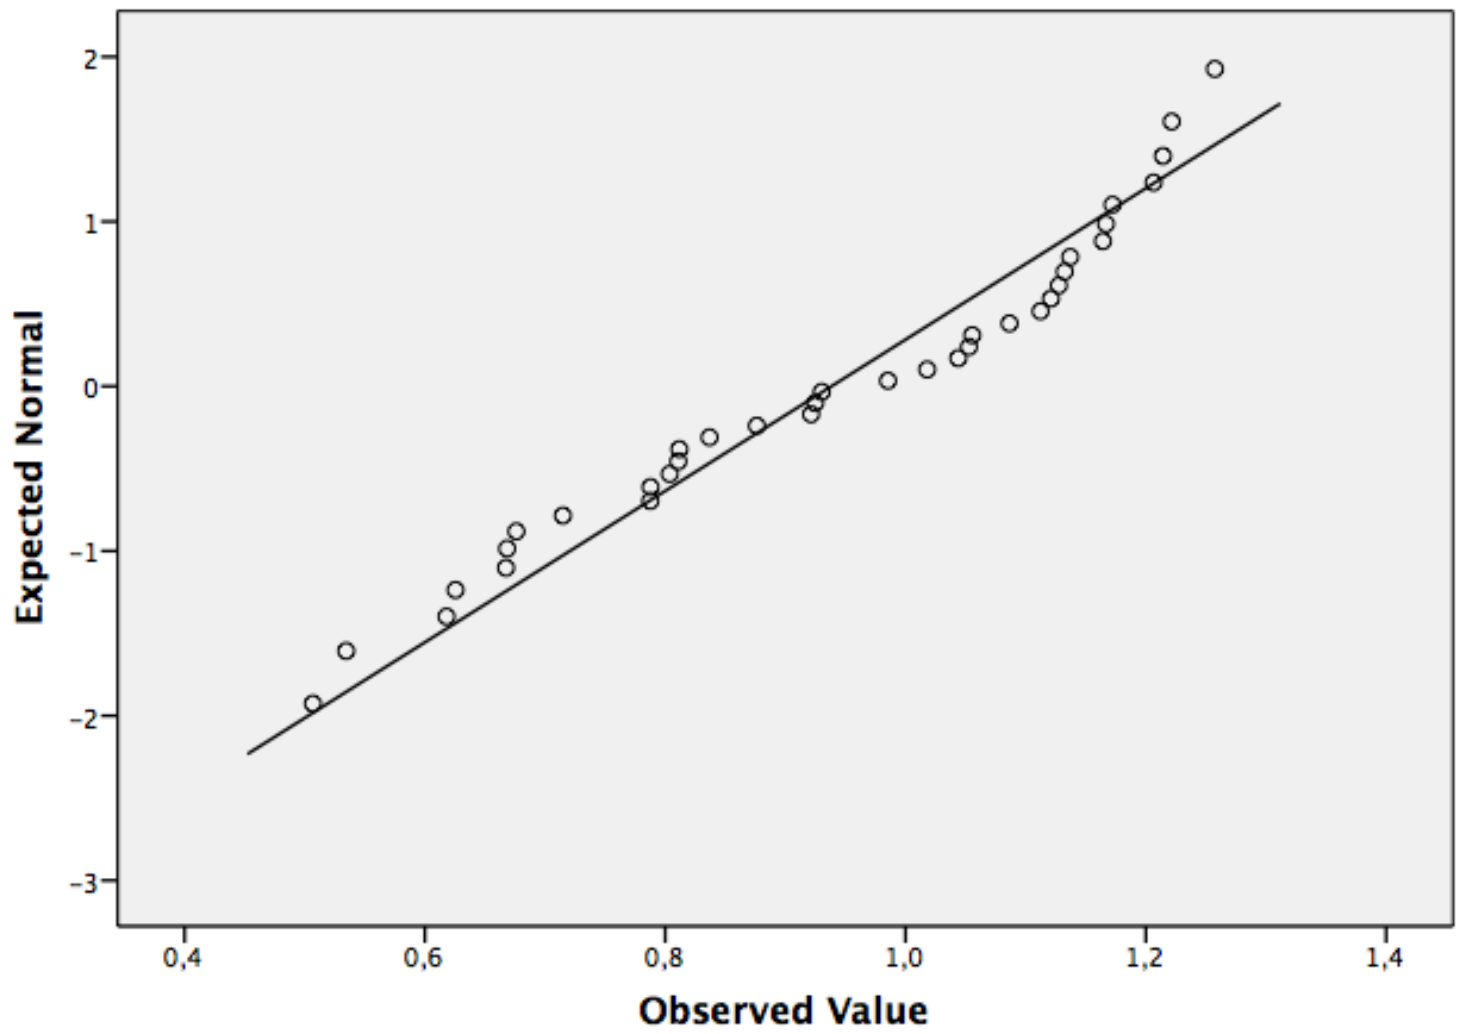

Normal Q-Q Plots

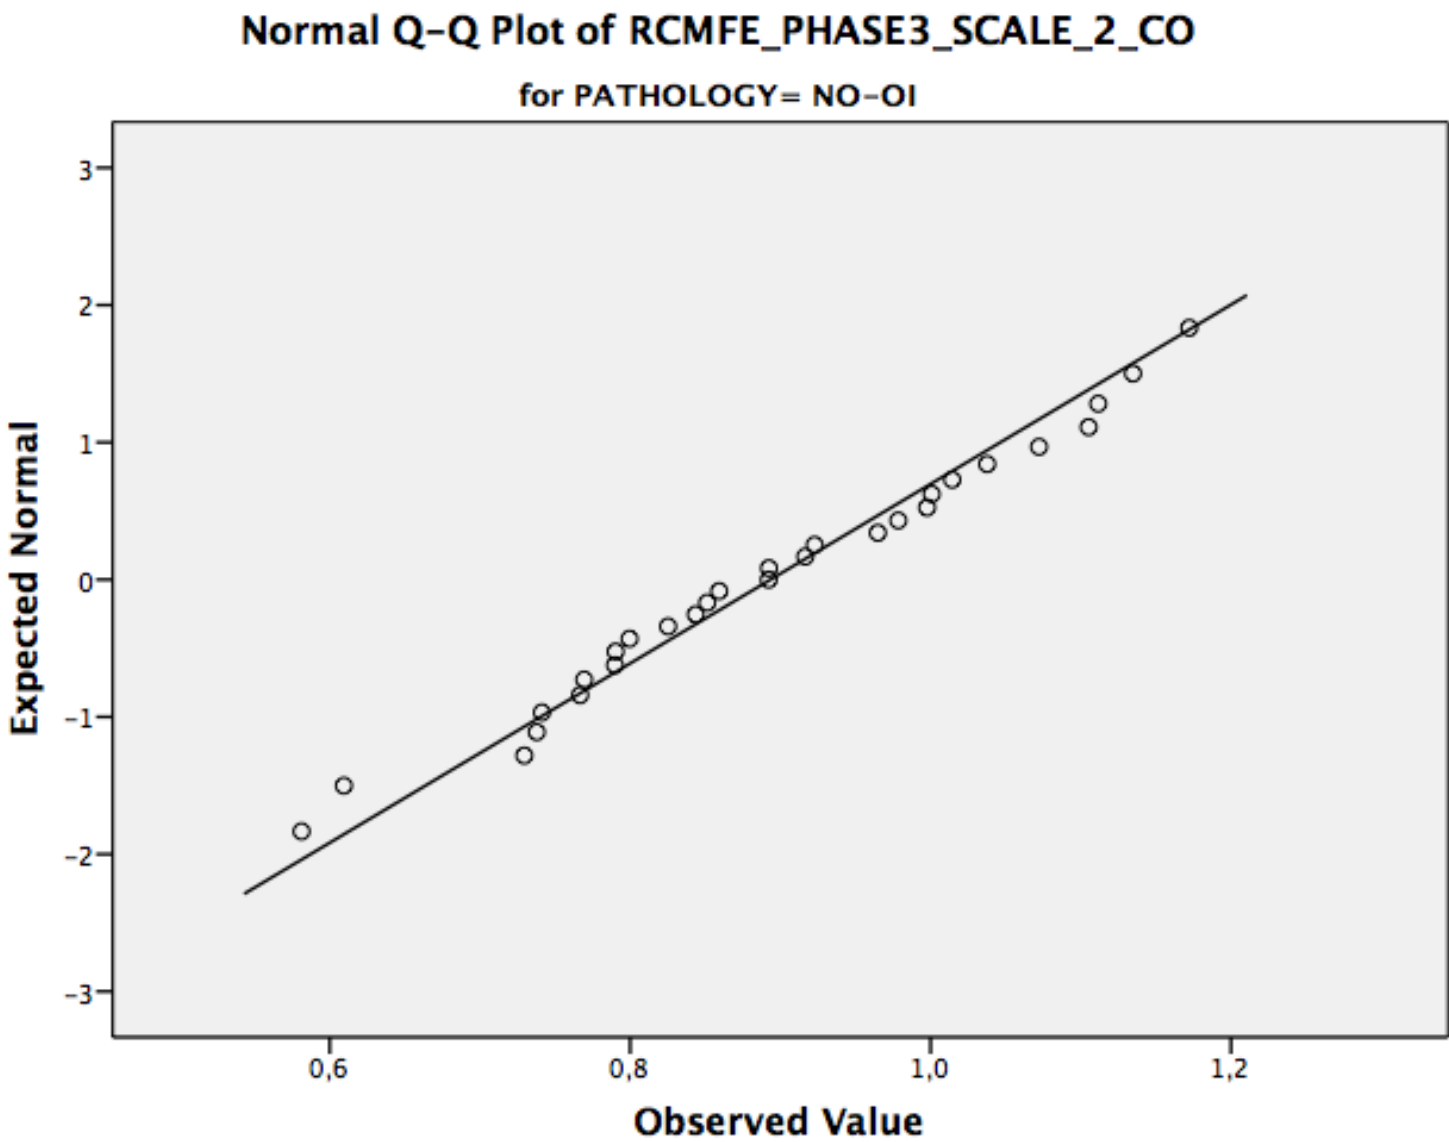

# Normal Q-Q Plot of RCMFE\_PHASE3\_SCALE\_2\_CO

for PATHOLOGY= OI

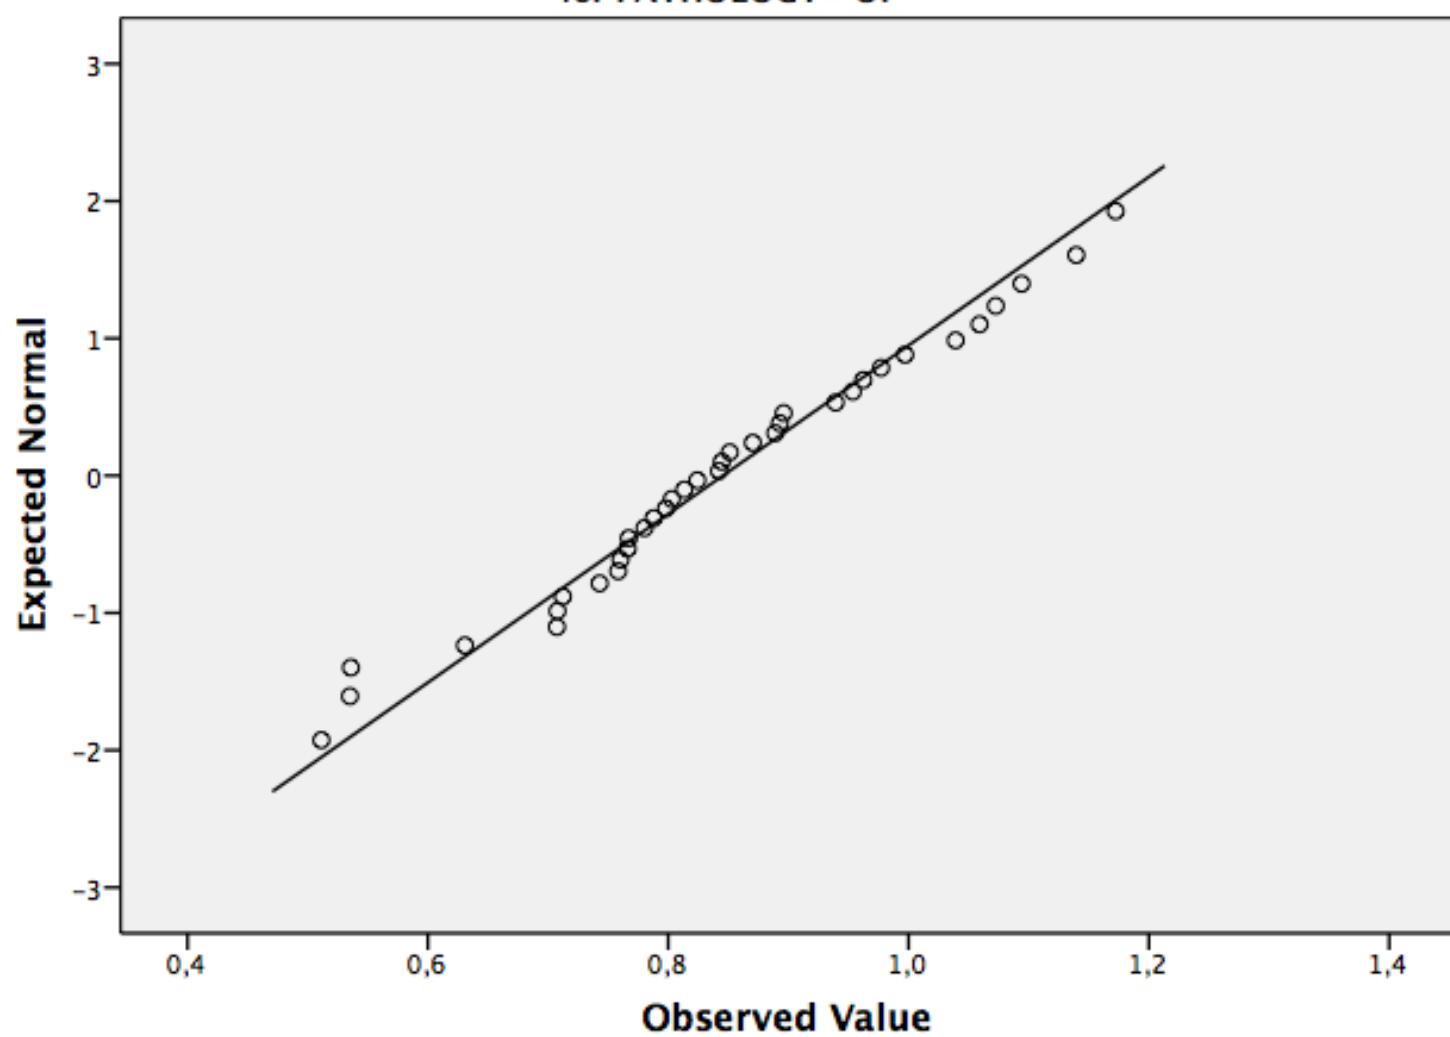

Normal Q-Q Plots

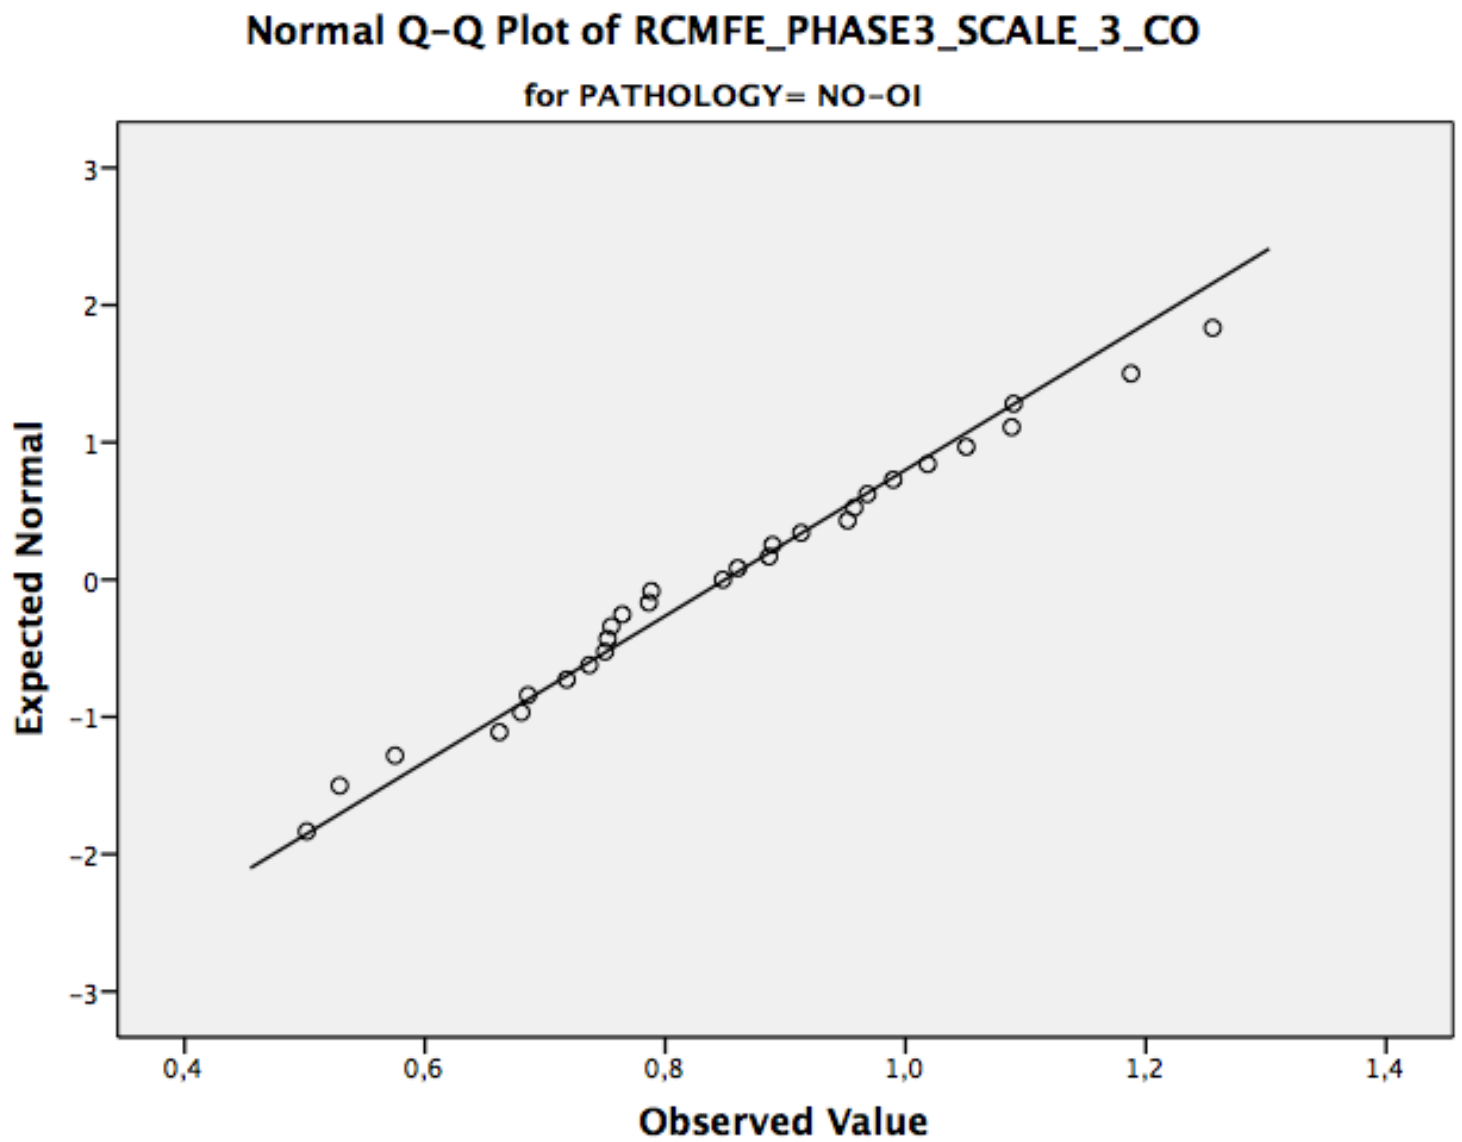

# Normal Q-Q Plot of RCMFE\_PHASE3\_SCALE\_3\_CO

for PATHOLOGY= OI

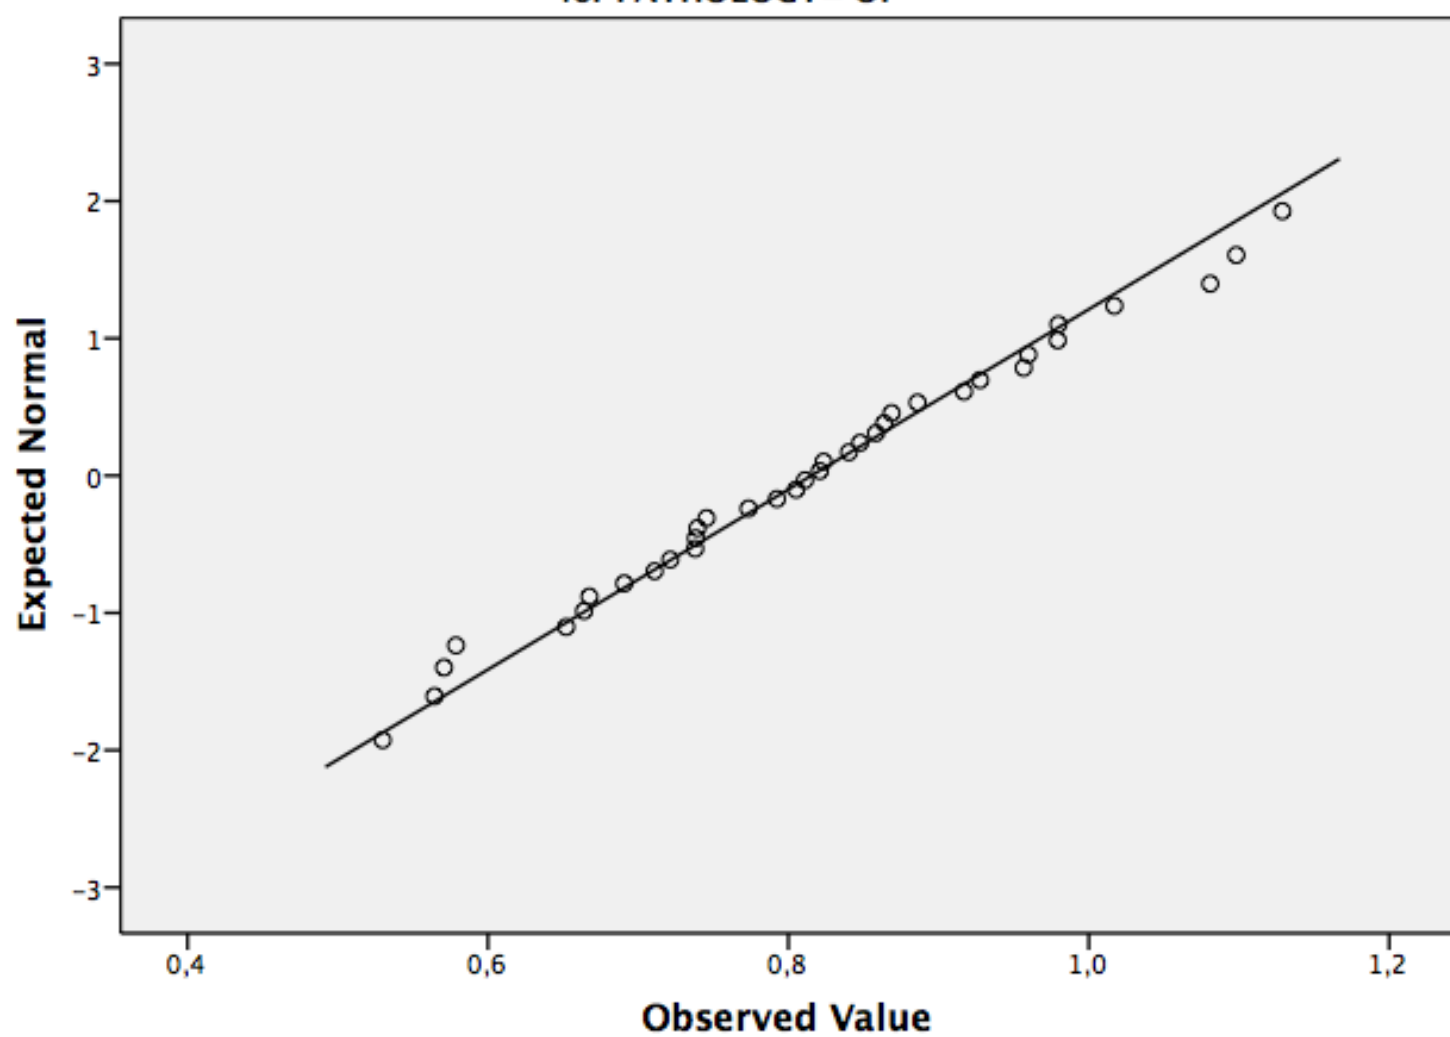

Normal Q-Q Plots

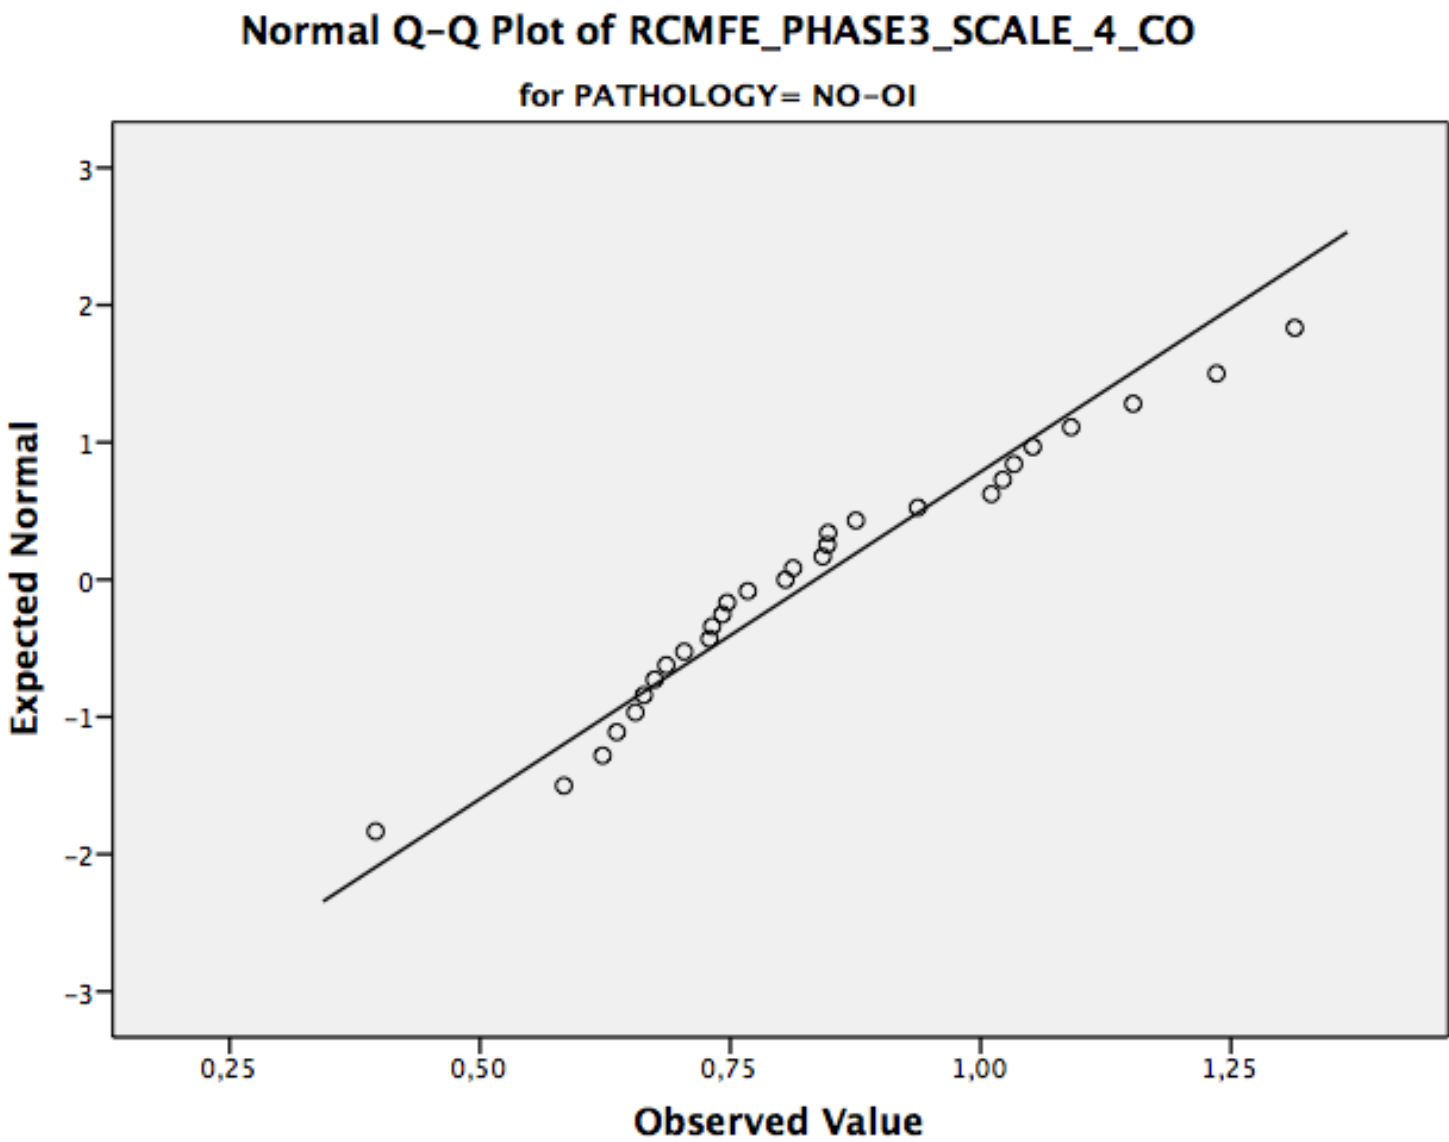

# Normal Q-Q Plot of RCMFE\_PHASE3\_SCALE\_4\_CO

for PATHOLOGY= OI

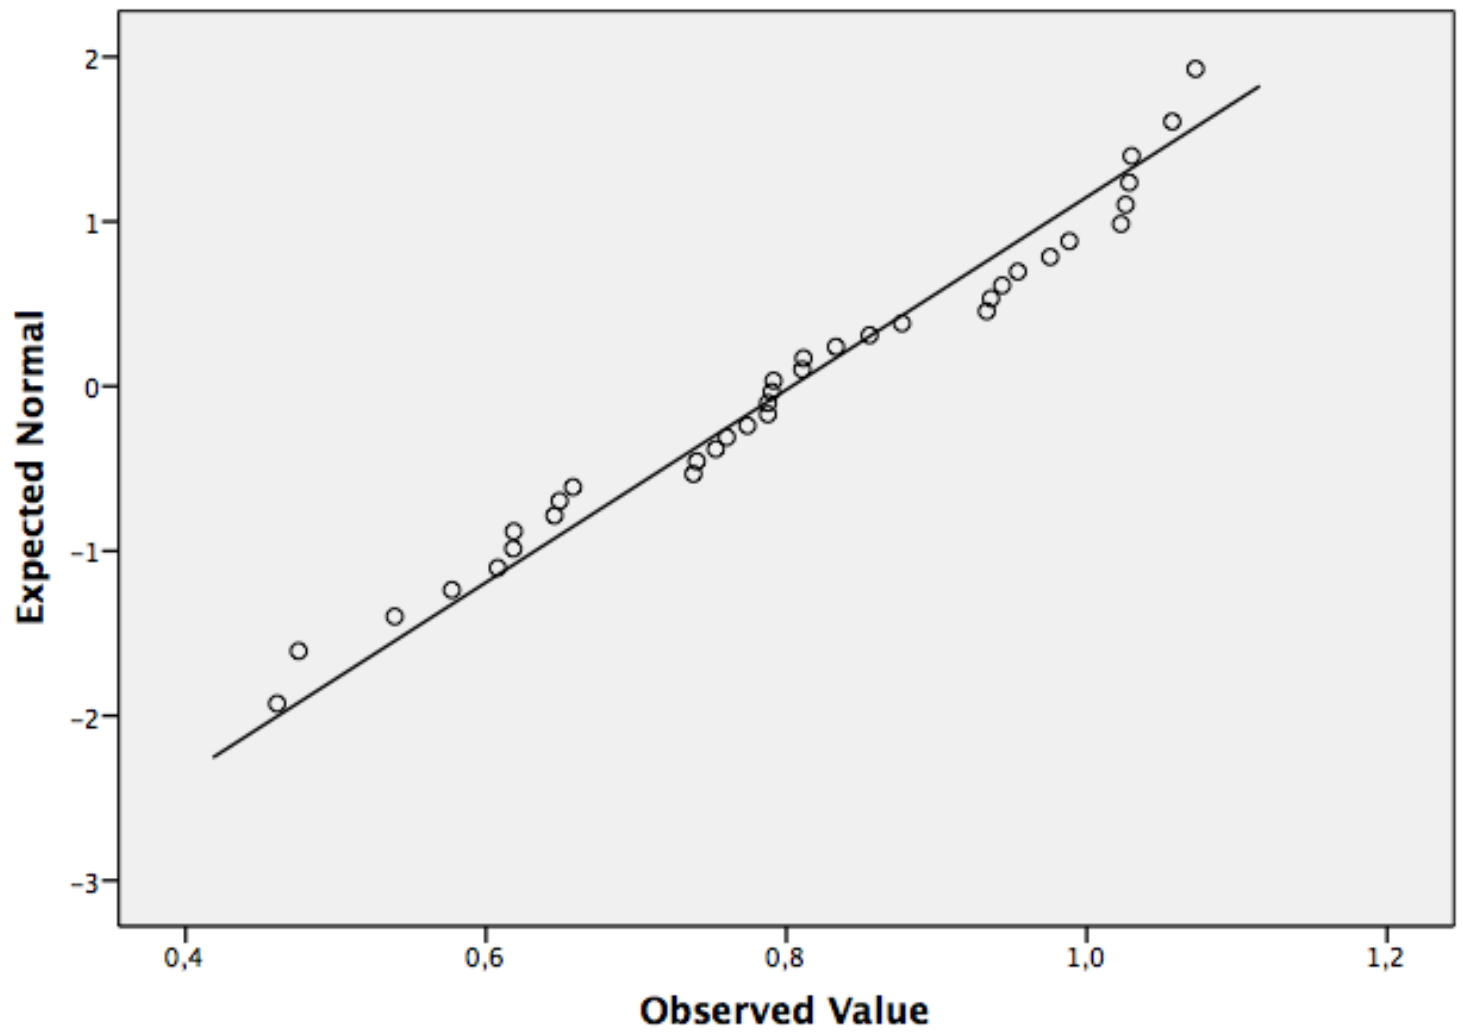



Normal Q-Q Plots

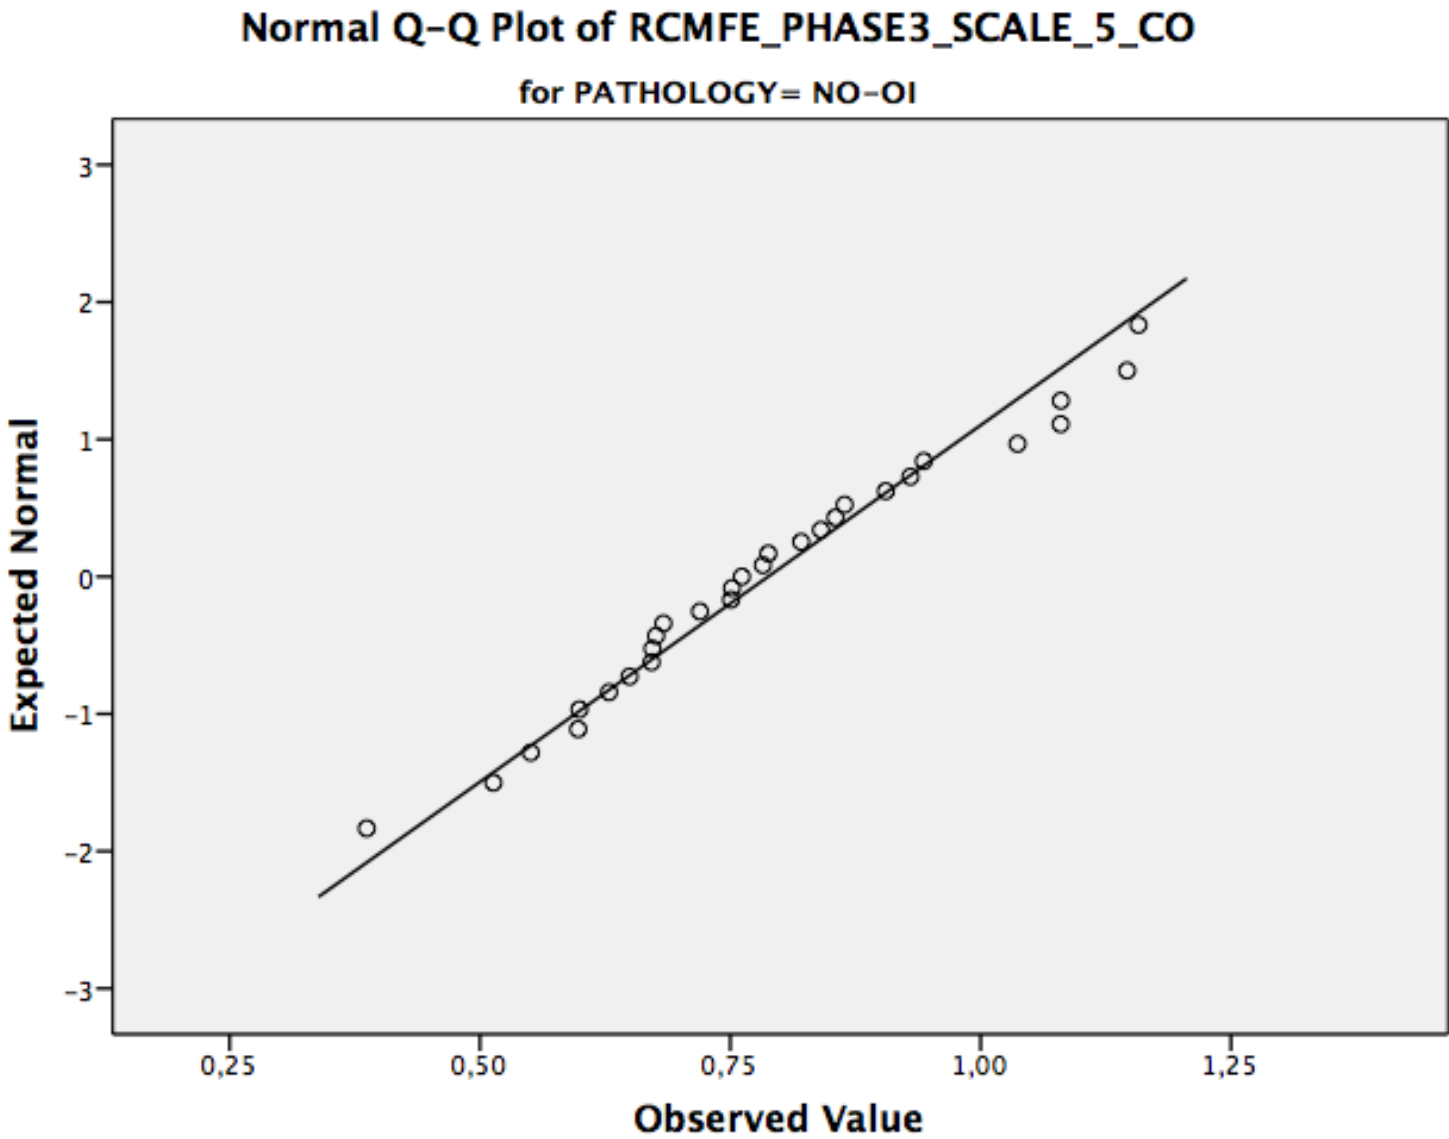

# Normal Q-Q Plot of RCMFE\_PHASE3\_SCALE\_5\_CO

for PATHOLOGY= OI

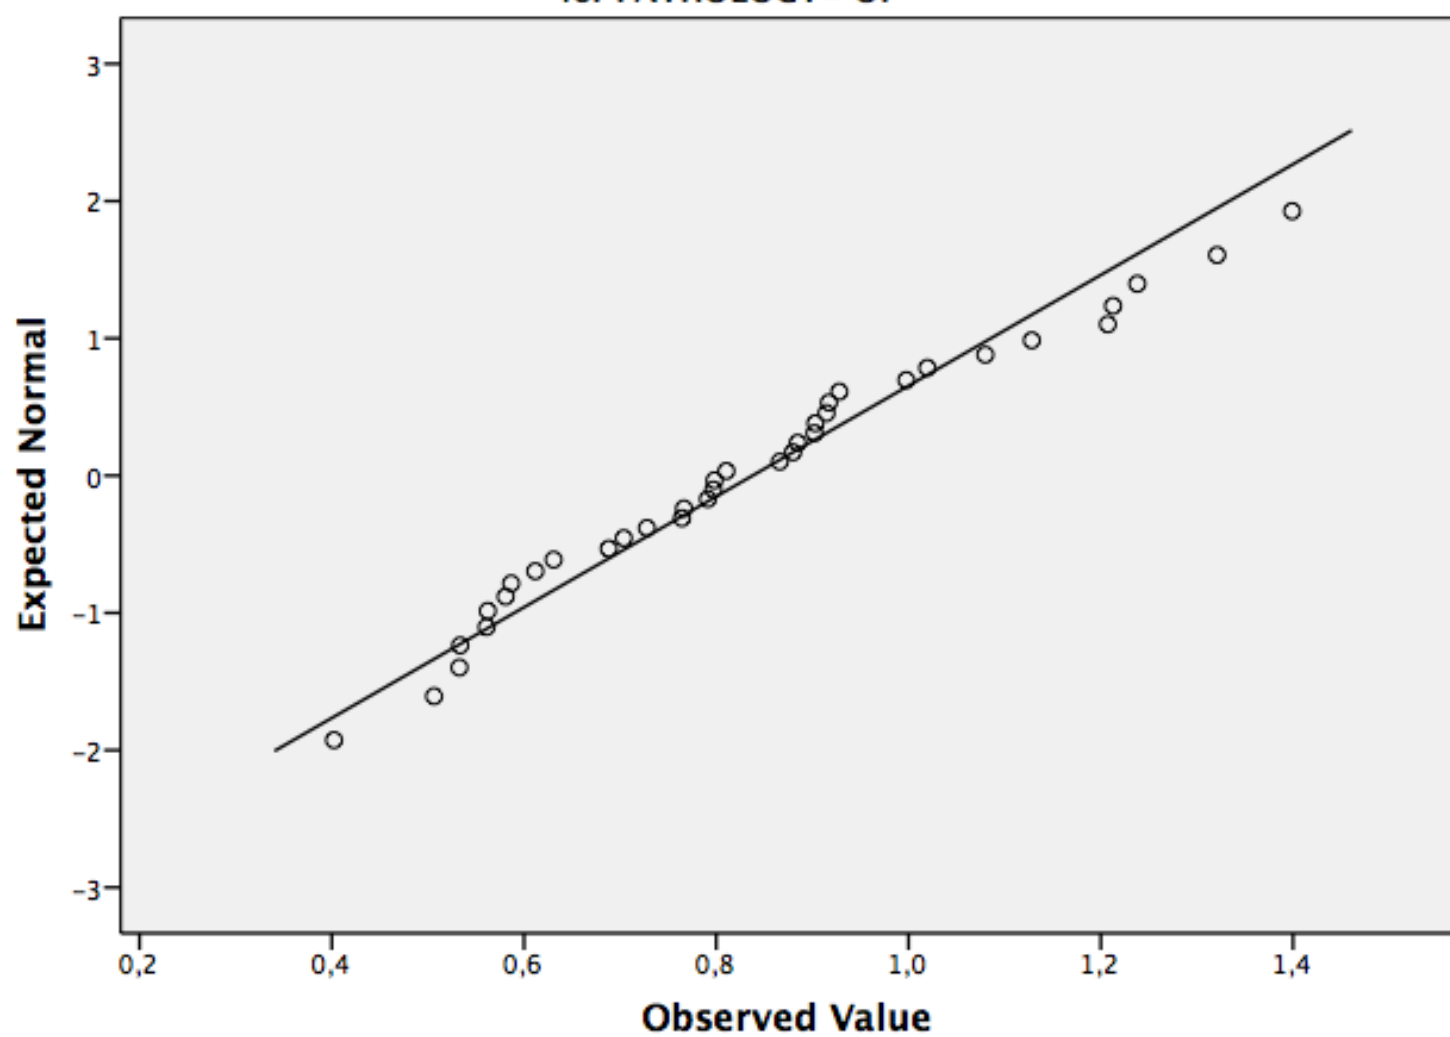

Normal Q-Q Plots

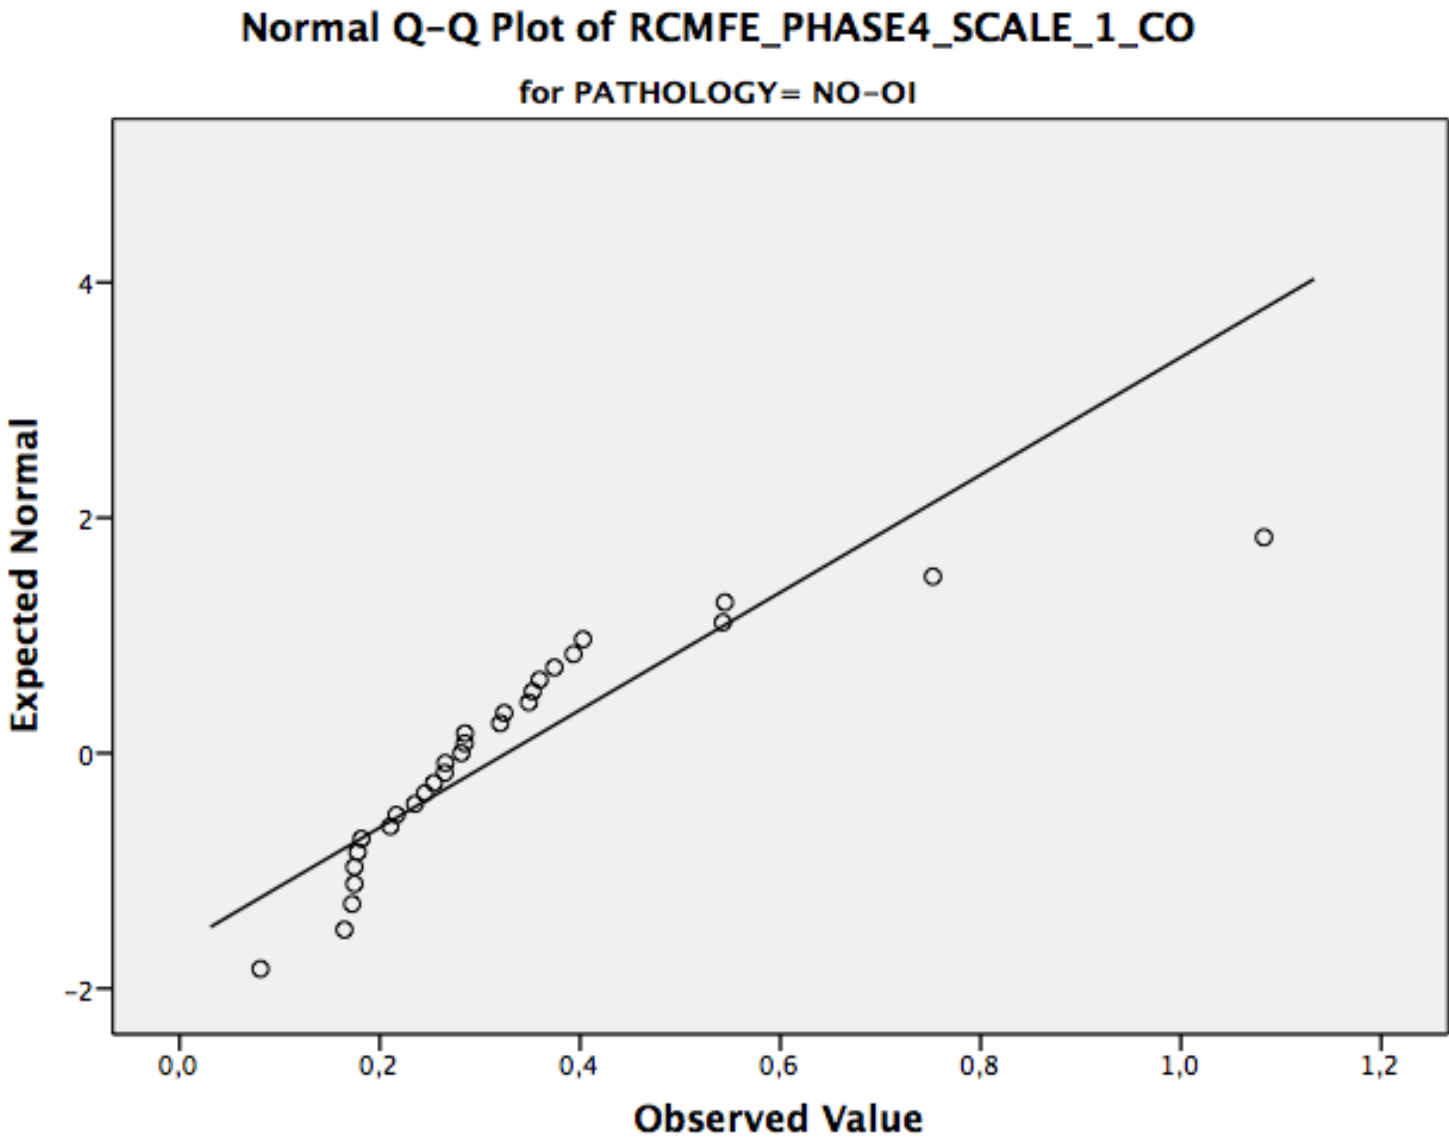

# Normal Q-Q Plot of RCMFE\_PHASE4\_SCALE\_1\_CO

for PATHOLOGY= OI

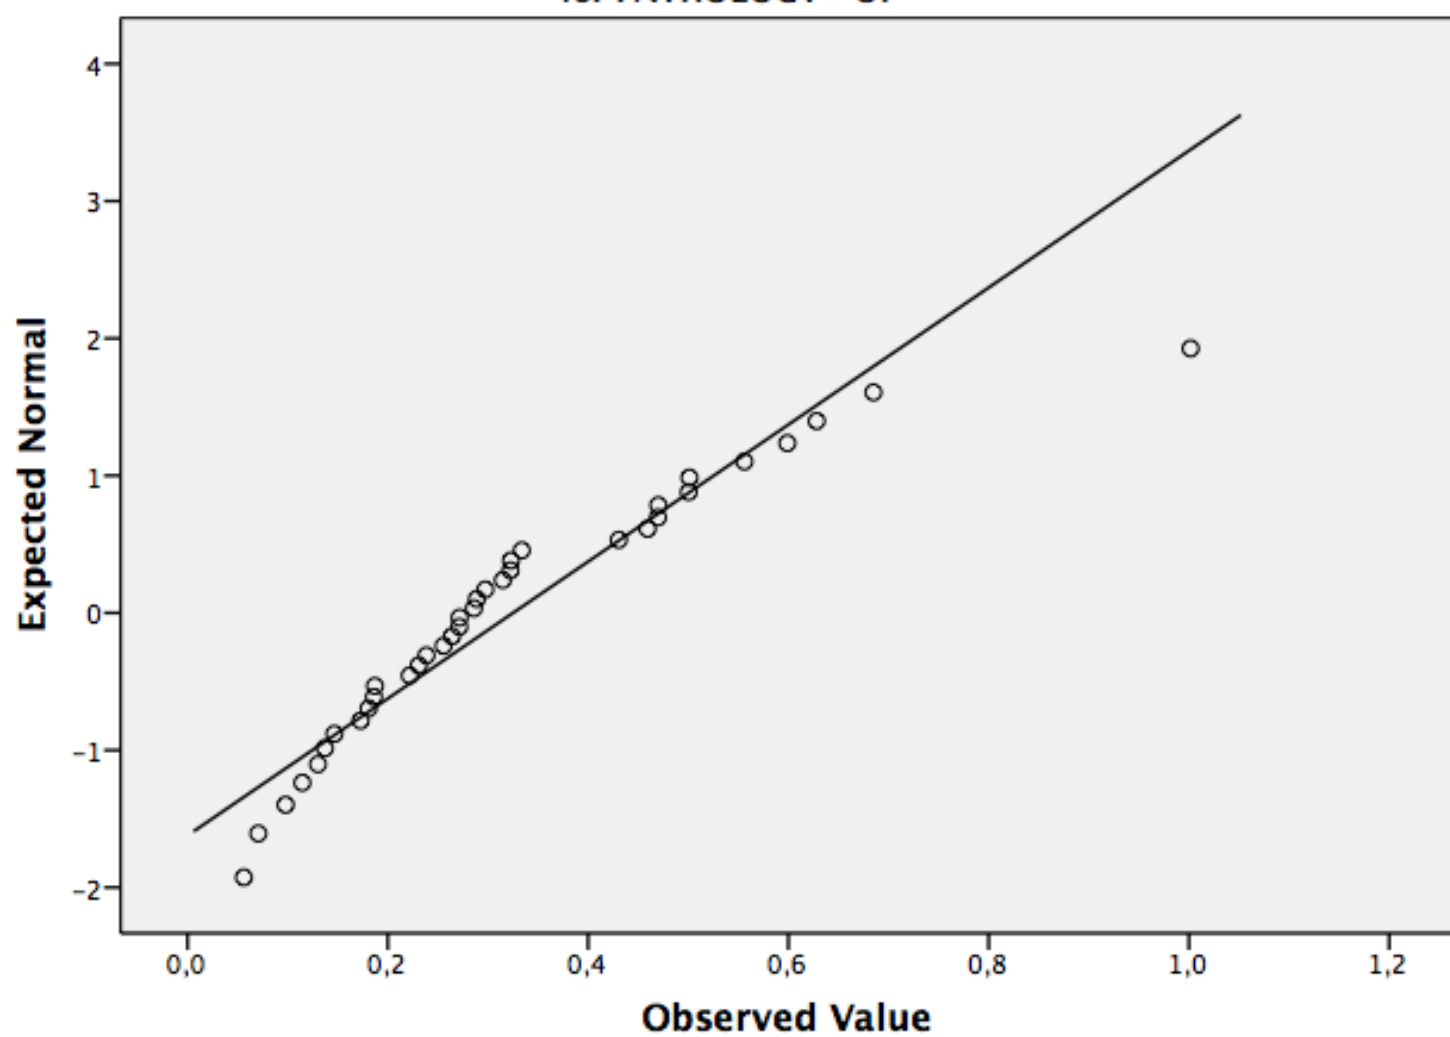

Normal Q-Q Plots

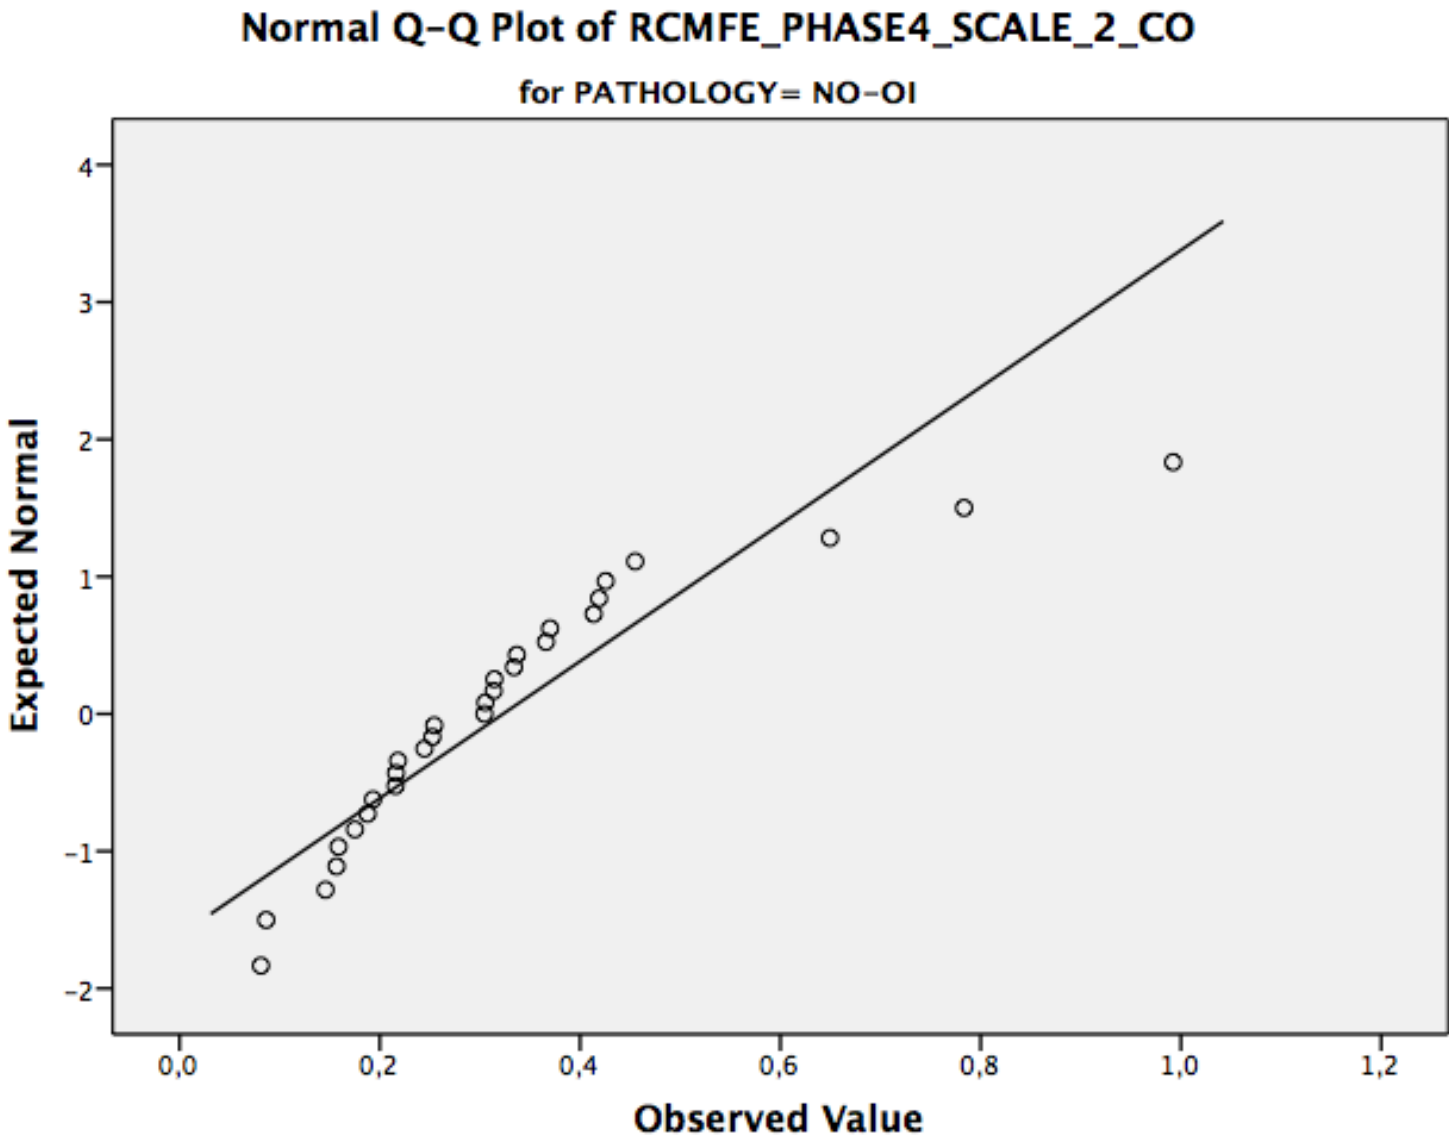

# Normal Q-Q Plot of RCMFE\_PHASE4\_SCALE\_2\_CO

for PATHOLOGY= OI

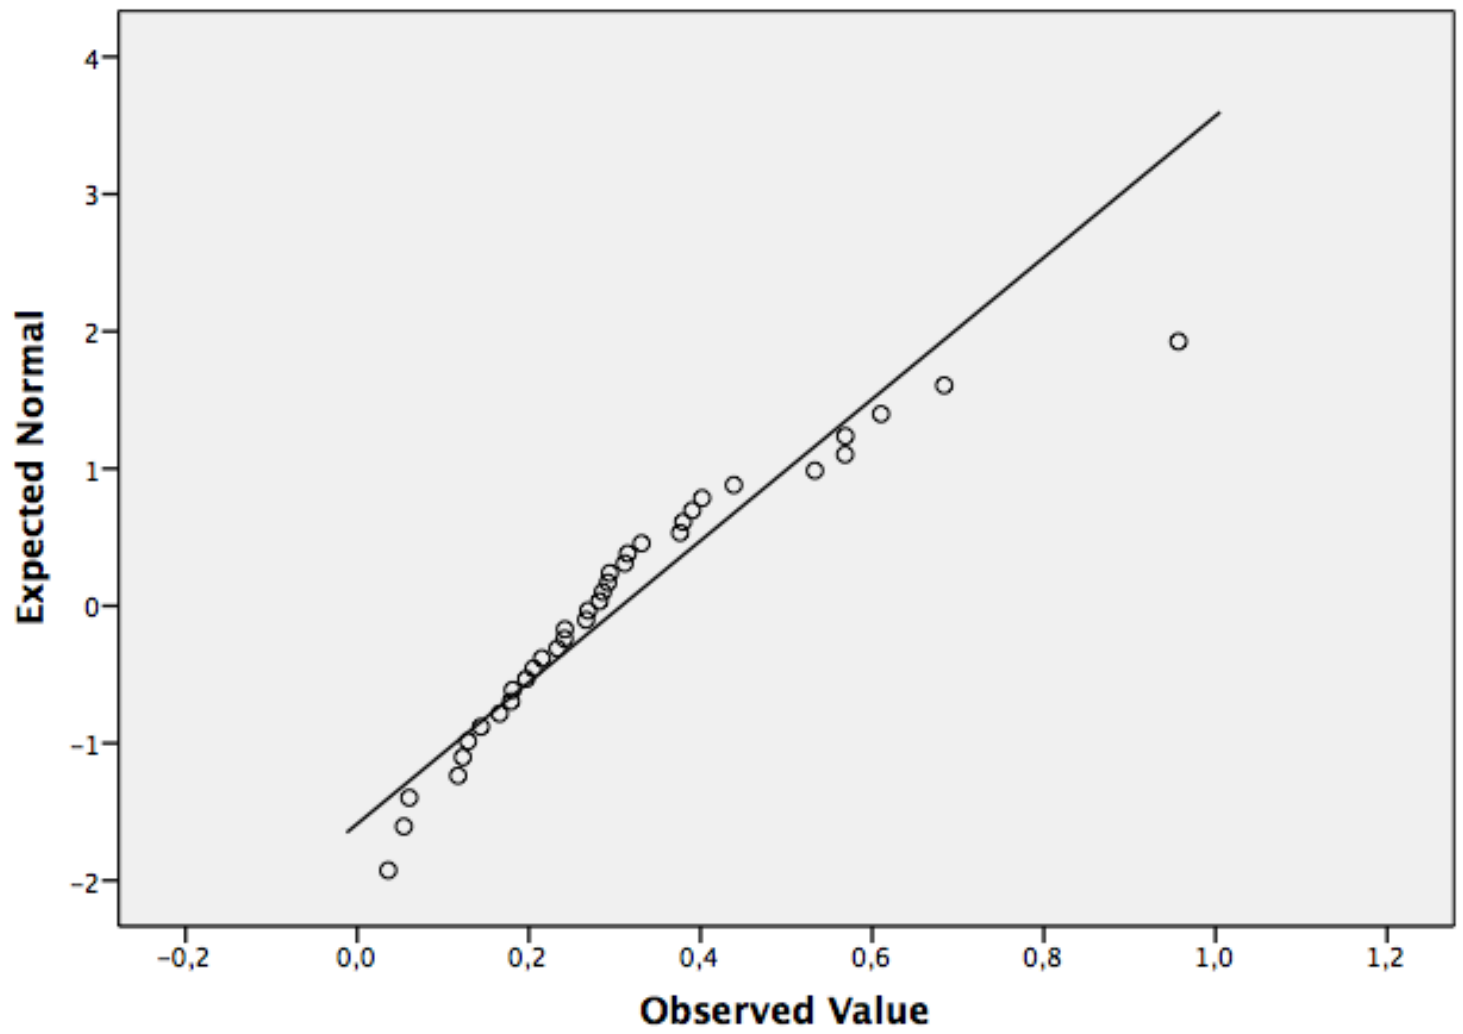

Normal Q-Q Plots

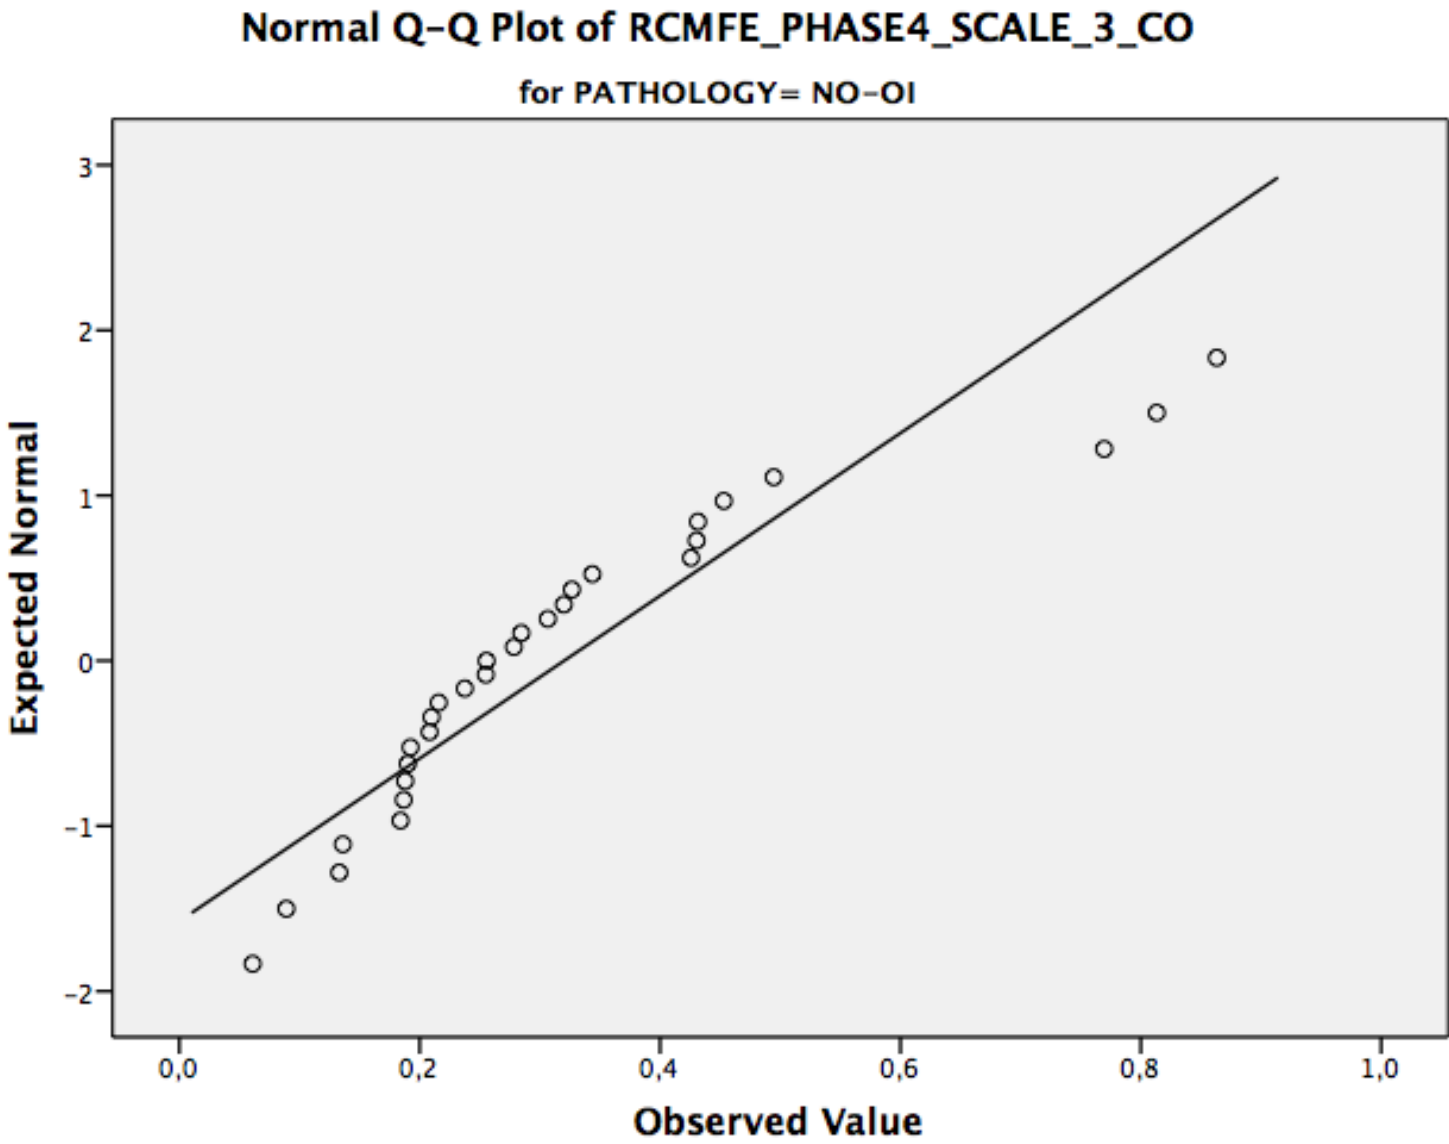

# Normal Q-Q Plot of RCMFE\_PHASE4\_SCALE\_3\_CO

for PATHOLOGY= OI

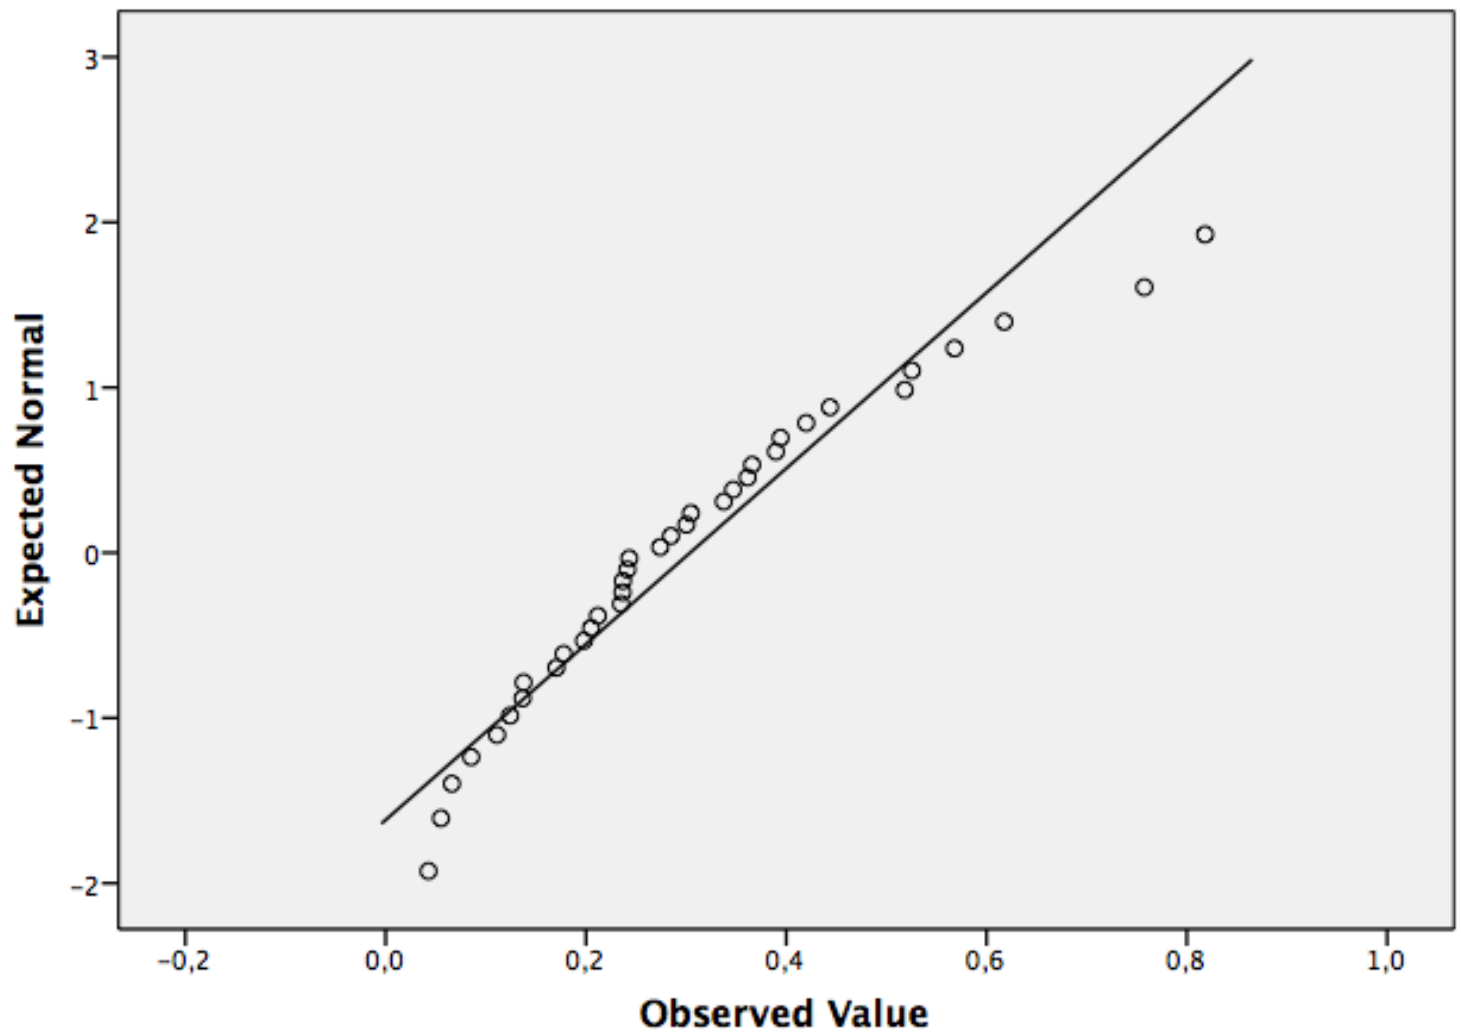



Normal Q-Q Plots

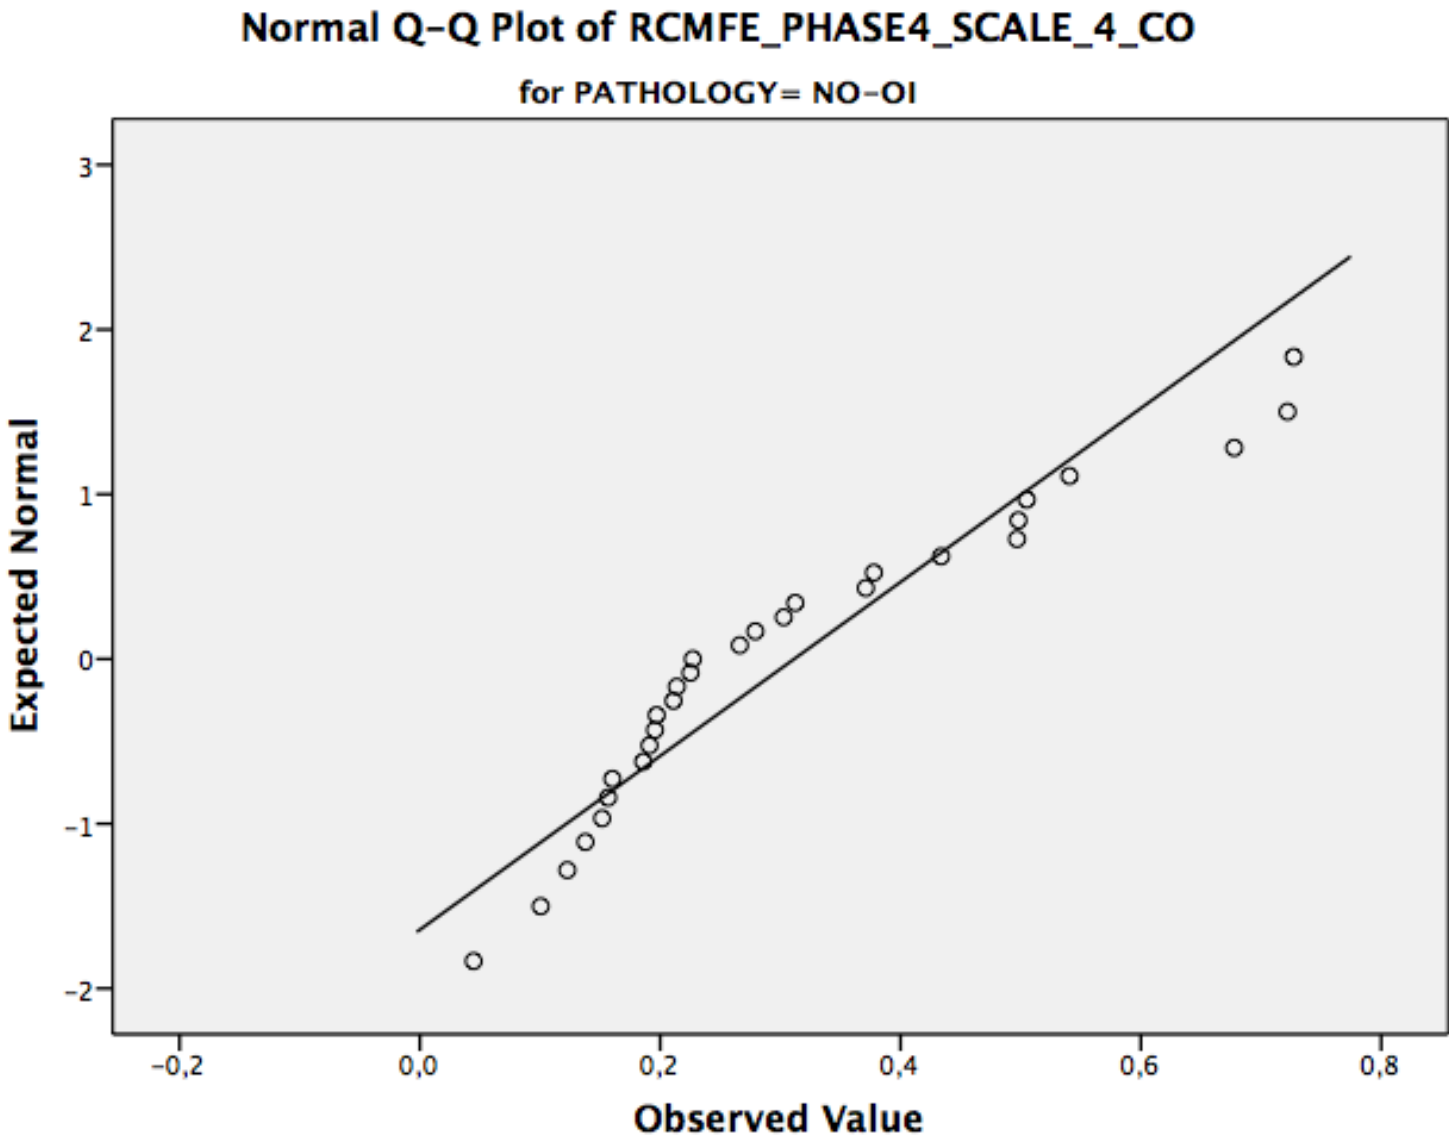

# Normal Q-Q Plot of RCMFE\_PHASE4\_SCALE\_4\_CO

for PATHOLOGY= OI

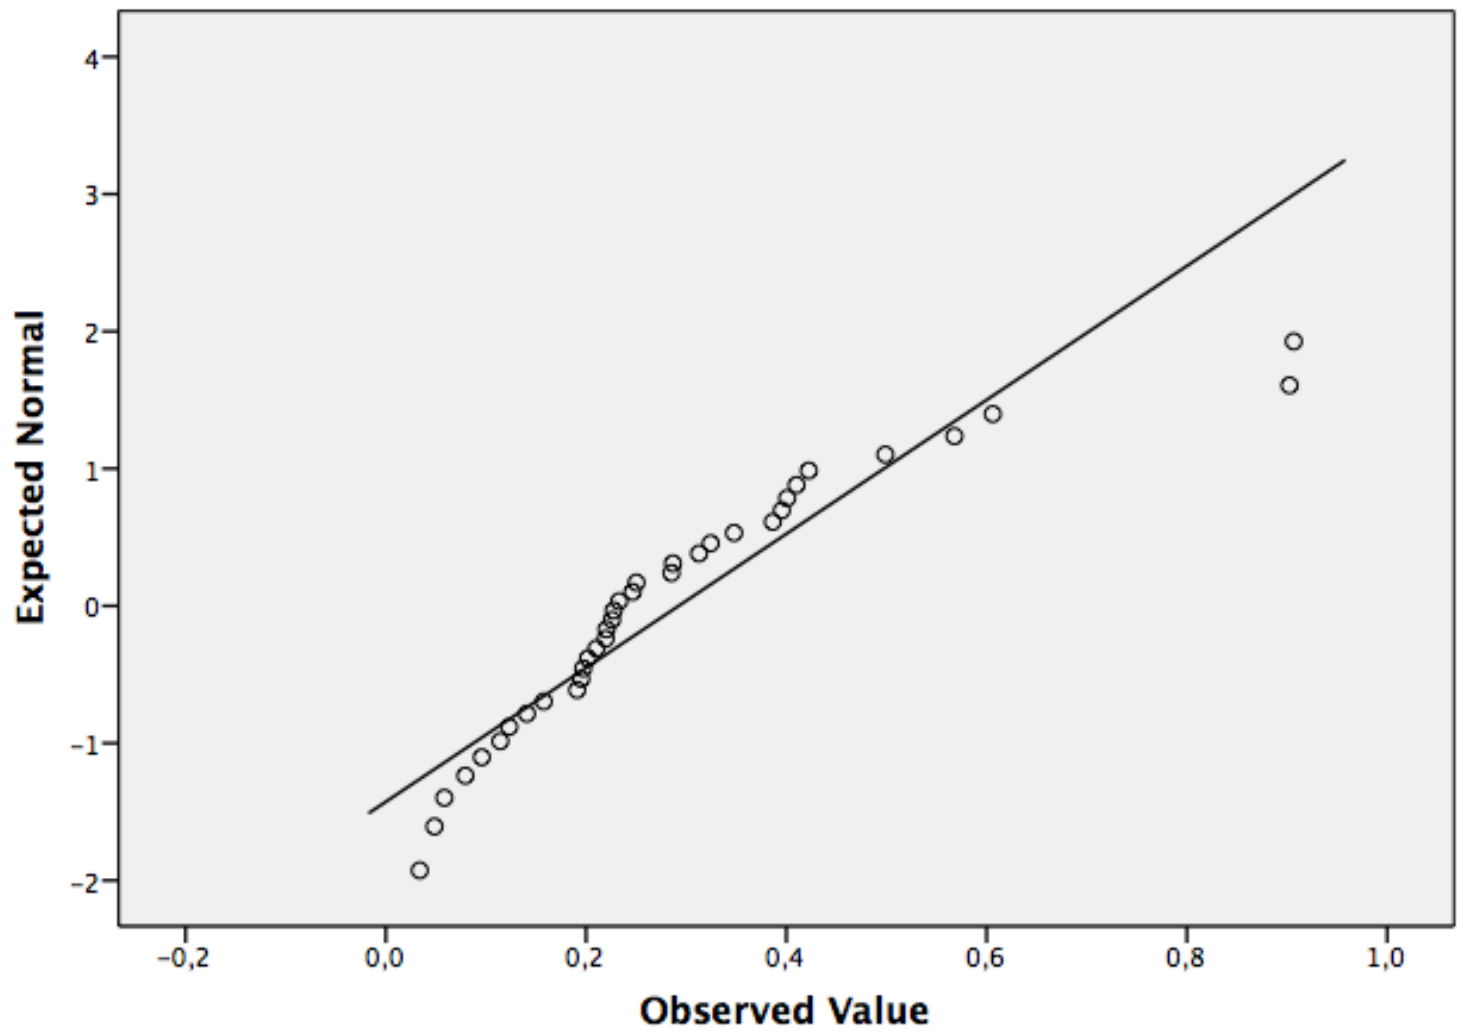

Normal Q-Q Plots

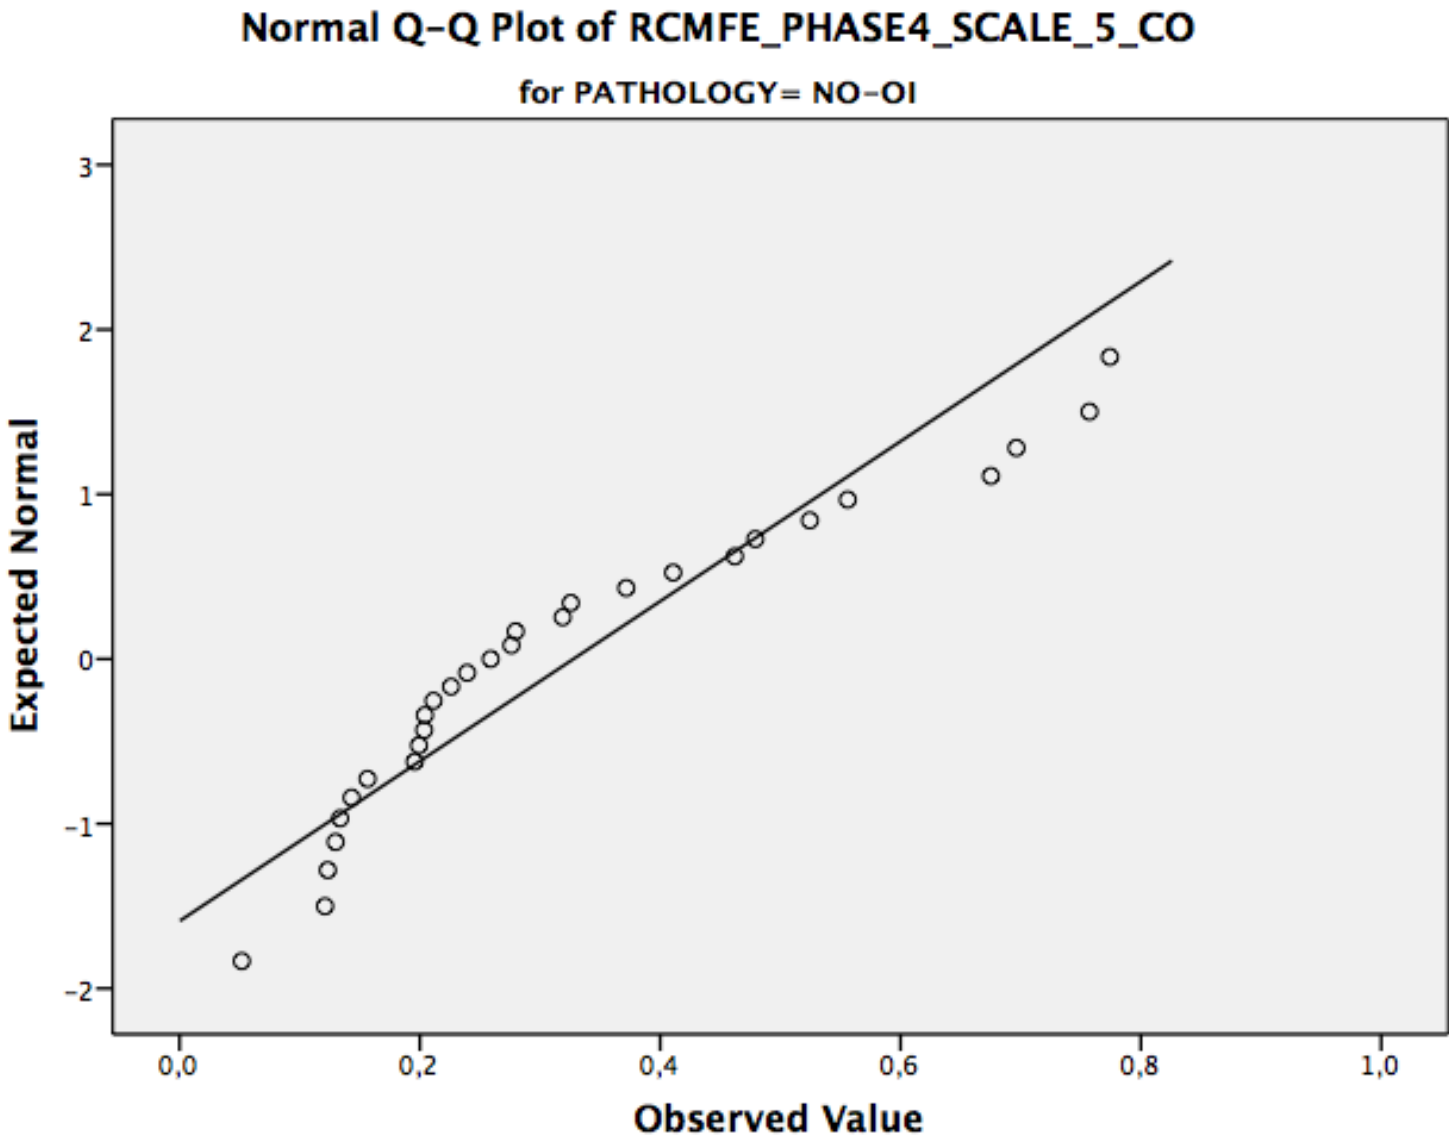

# Normal Q-Q Plot of RCMFE\_PHASE4\_SCALE\_5\_CO

for PATHOLOGY= OI

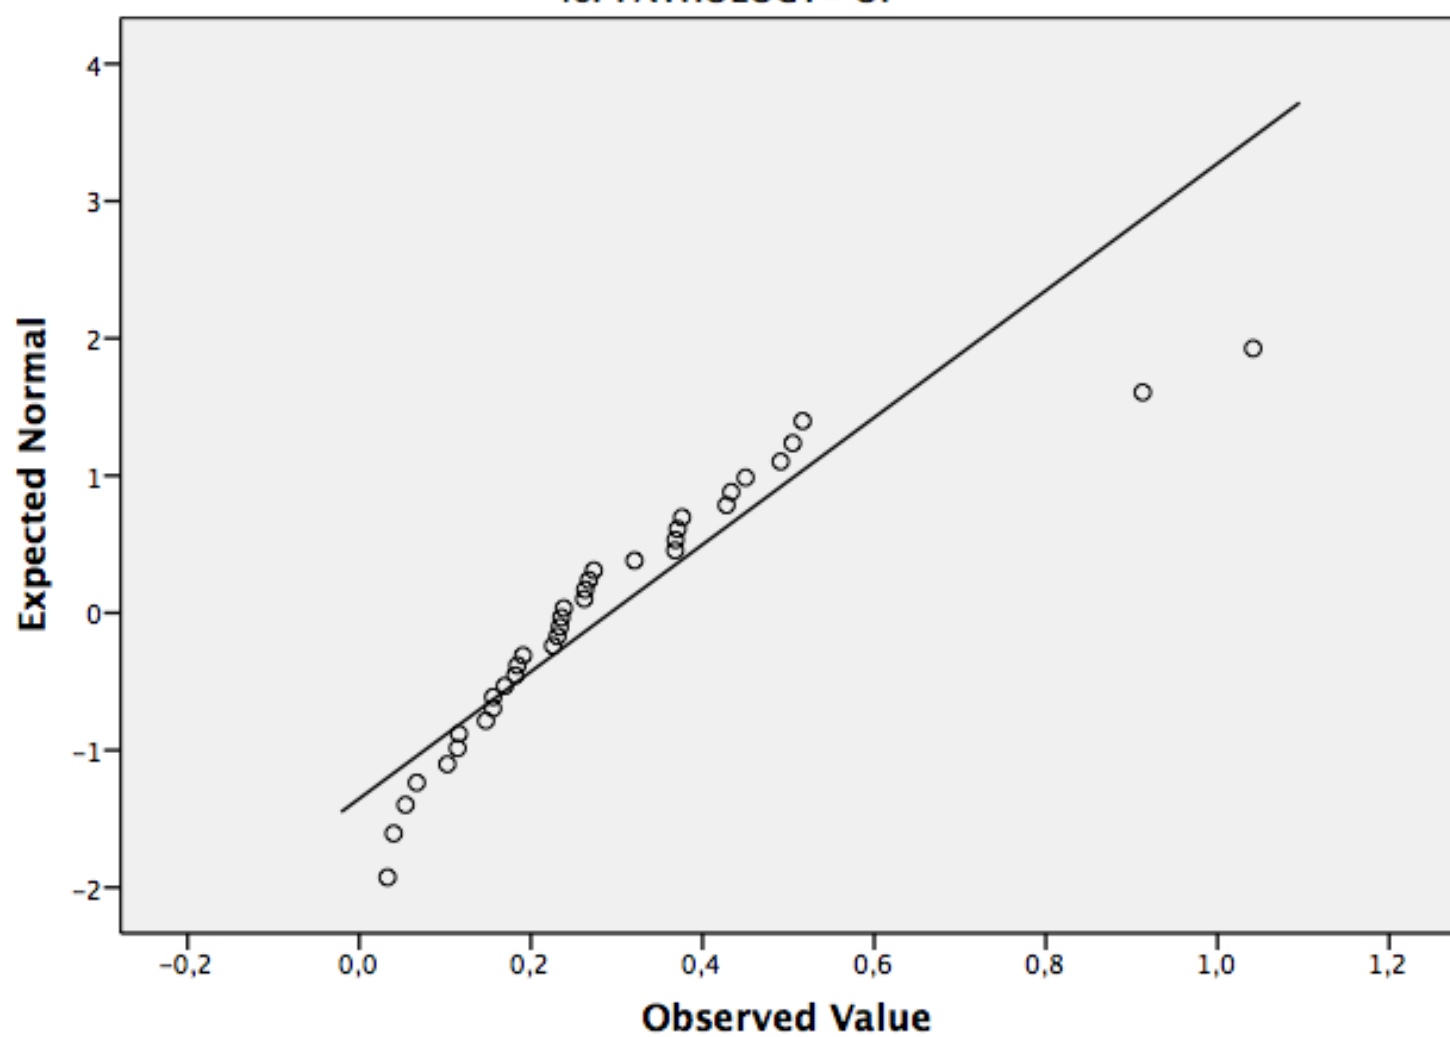

Normal Q-Q Plots

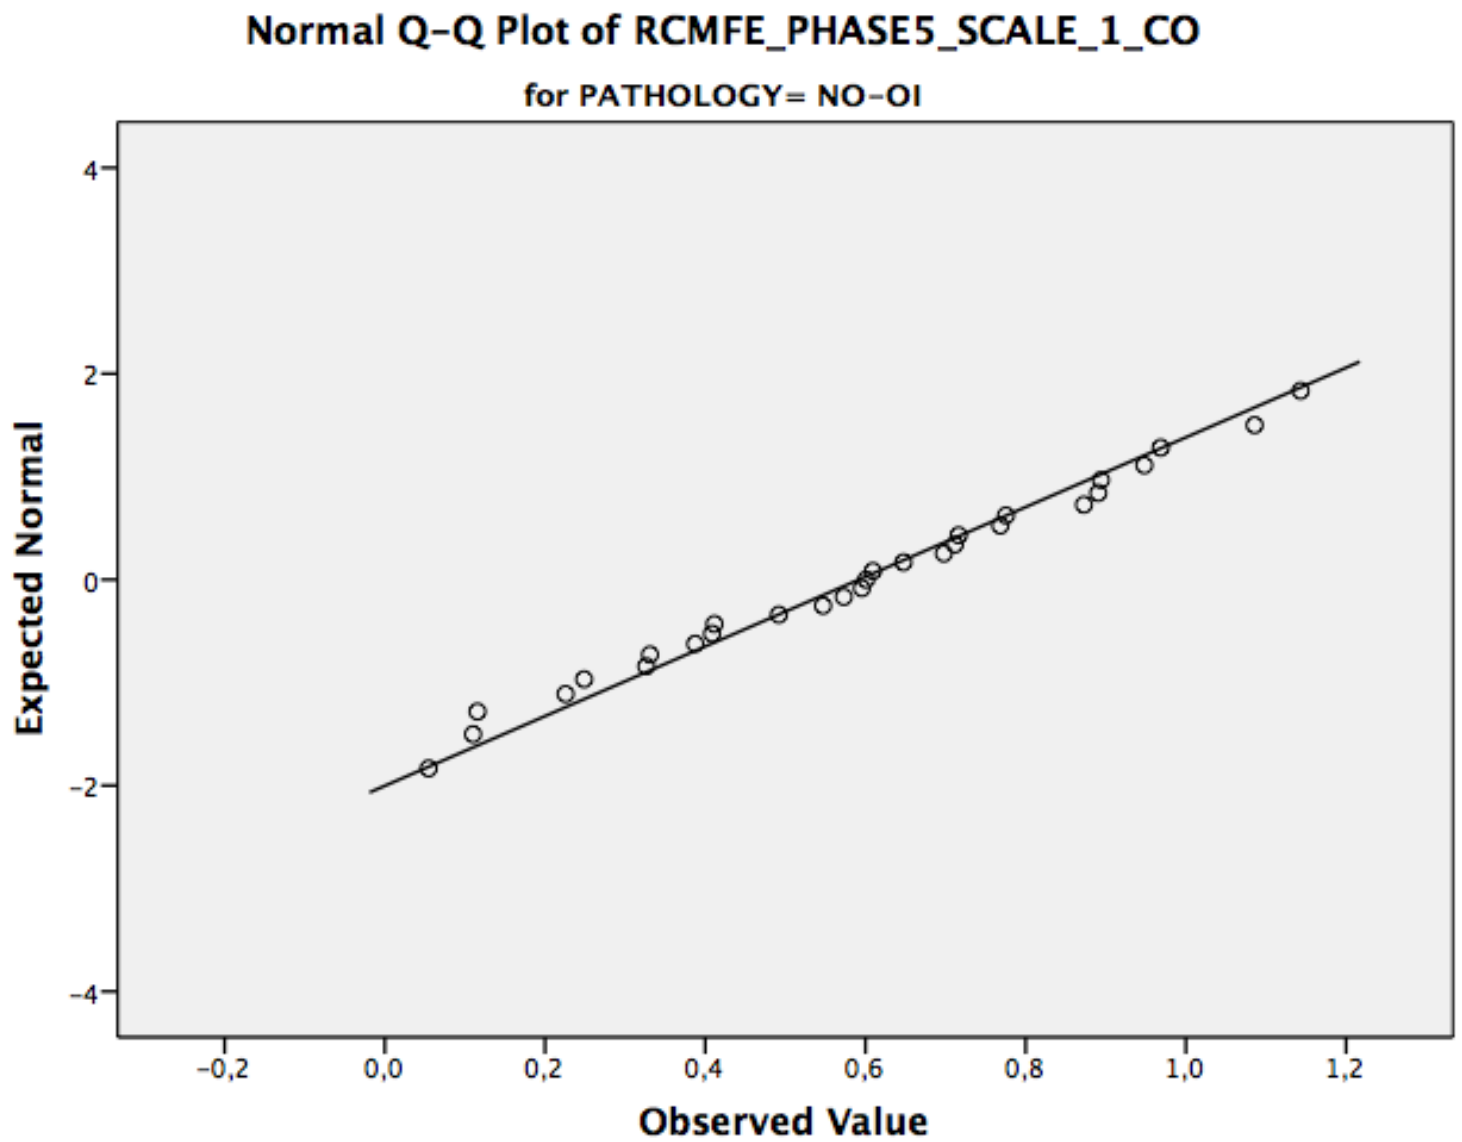

# Normal Q-Q Plot of RCMFE\_PHASE5\_SCALE\_1\_CO

for PATHOLOGY= OI

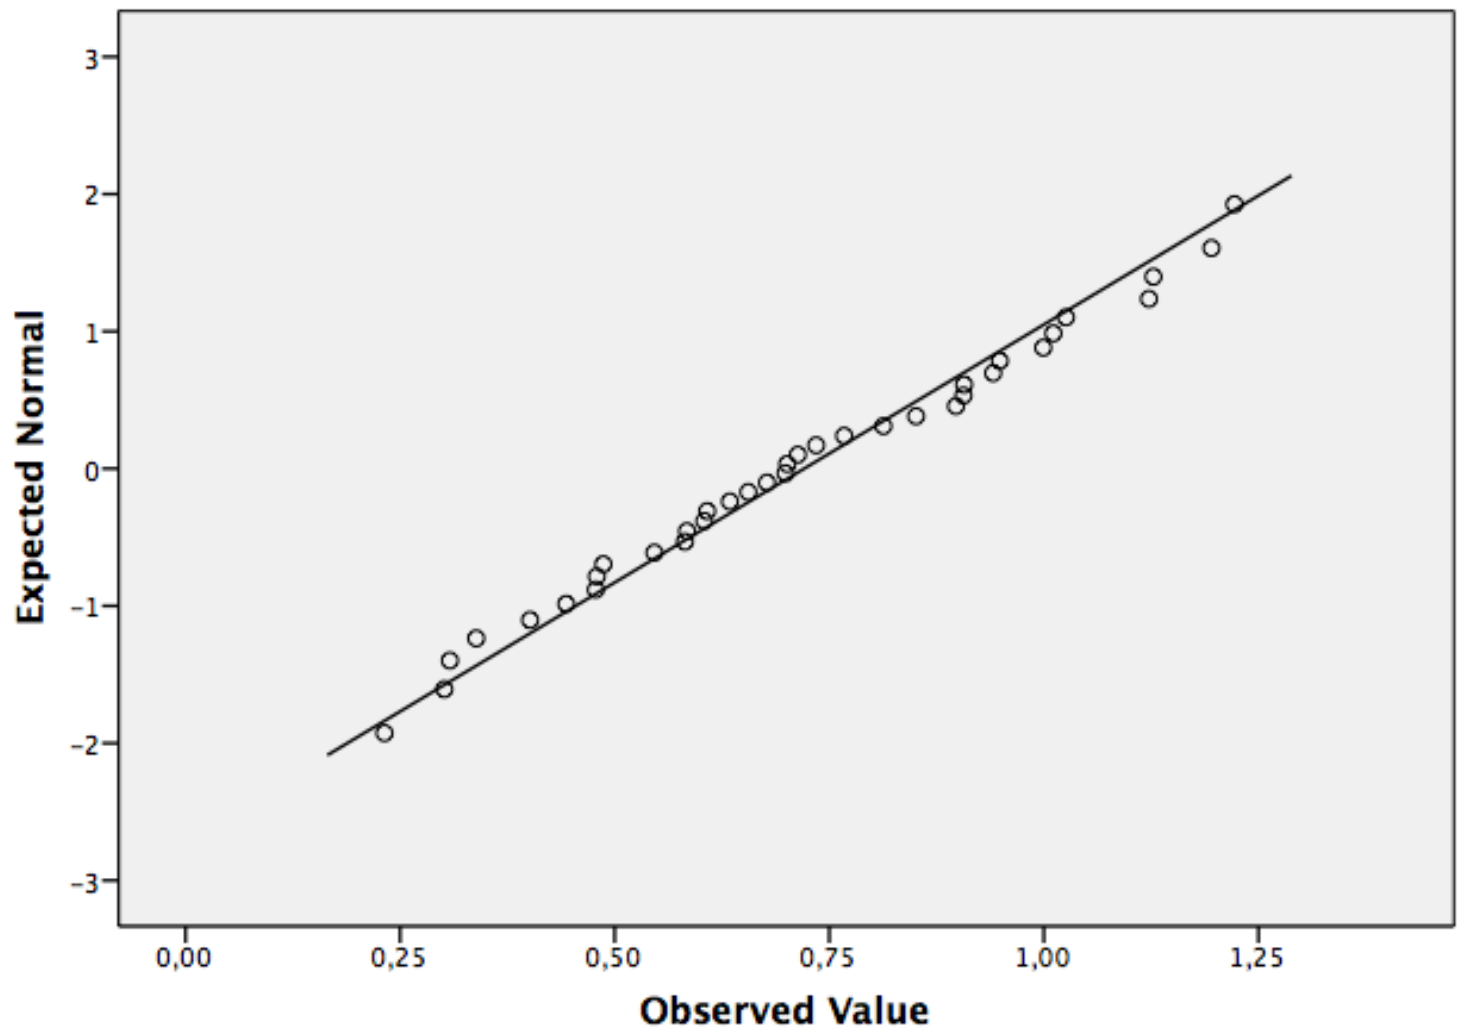

Normal Q-Q Plots

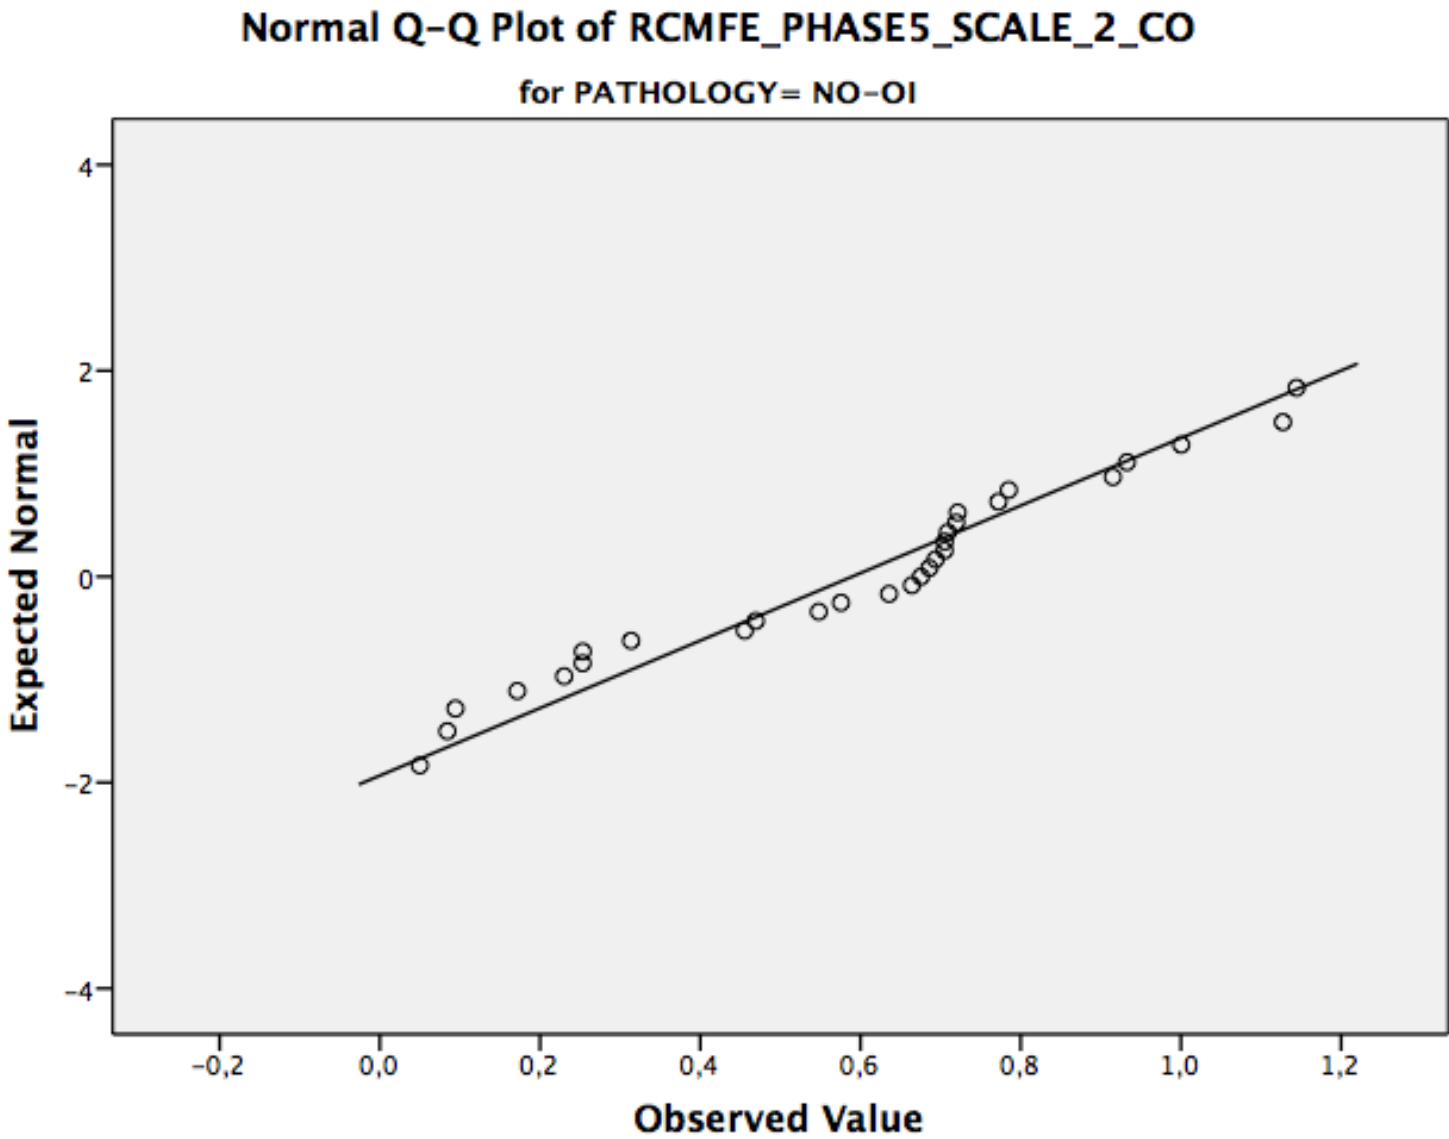

# Normal Q-Q Plot of RCMFE\_PHASE5\_SCALE\_2\_CO

for PATHOLOGY= OI

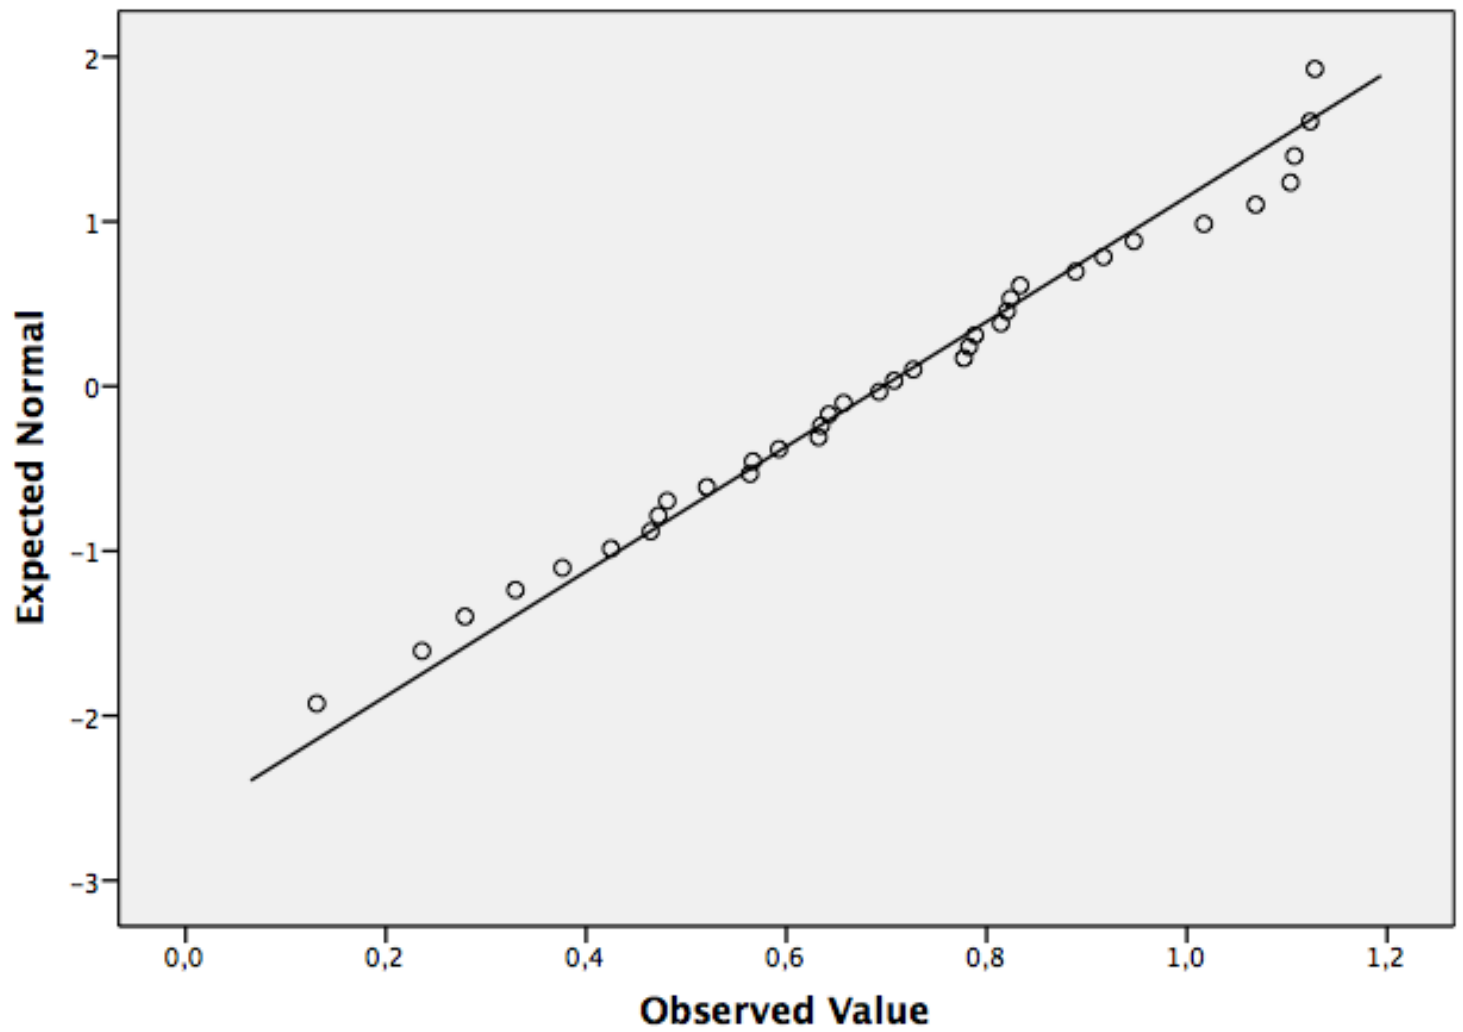



Normal Q-Q Plots

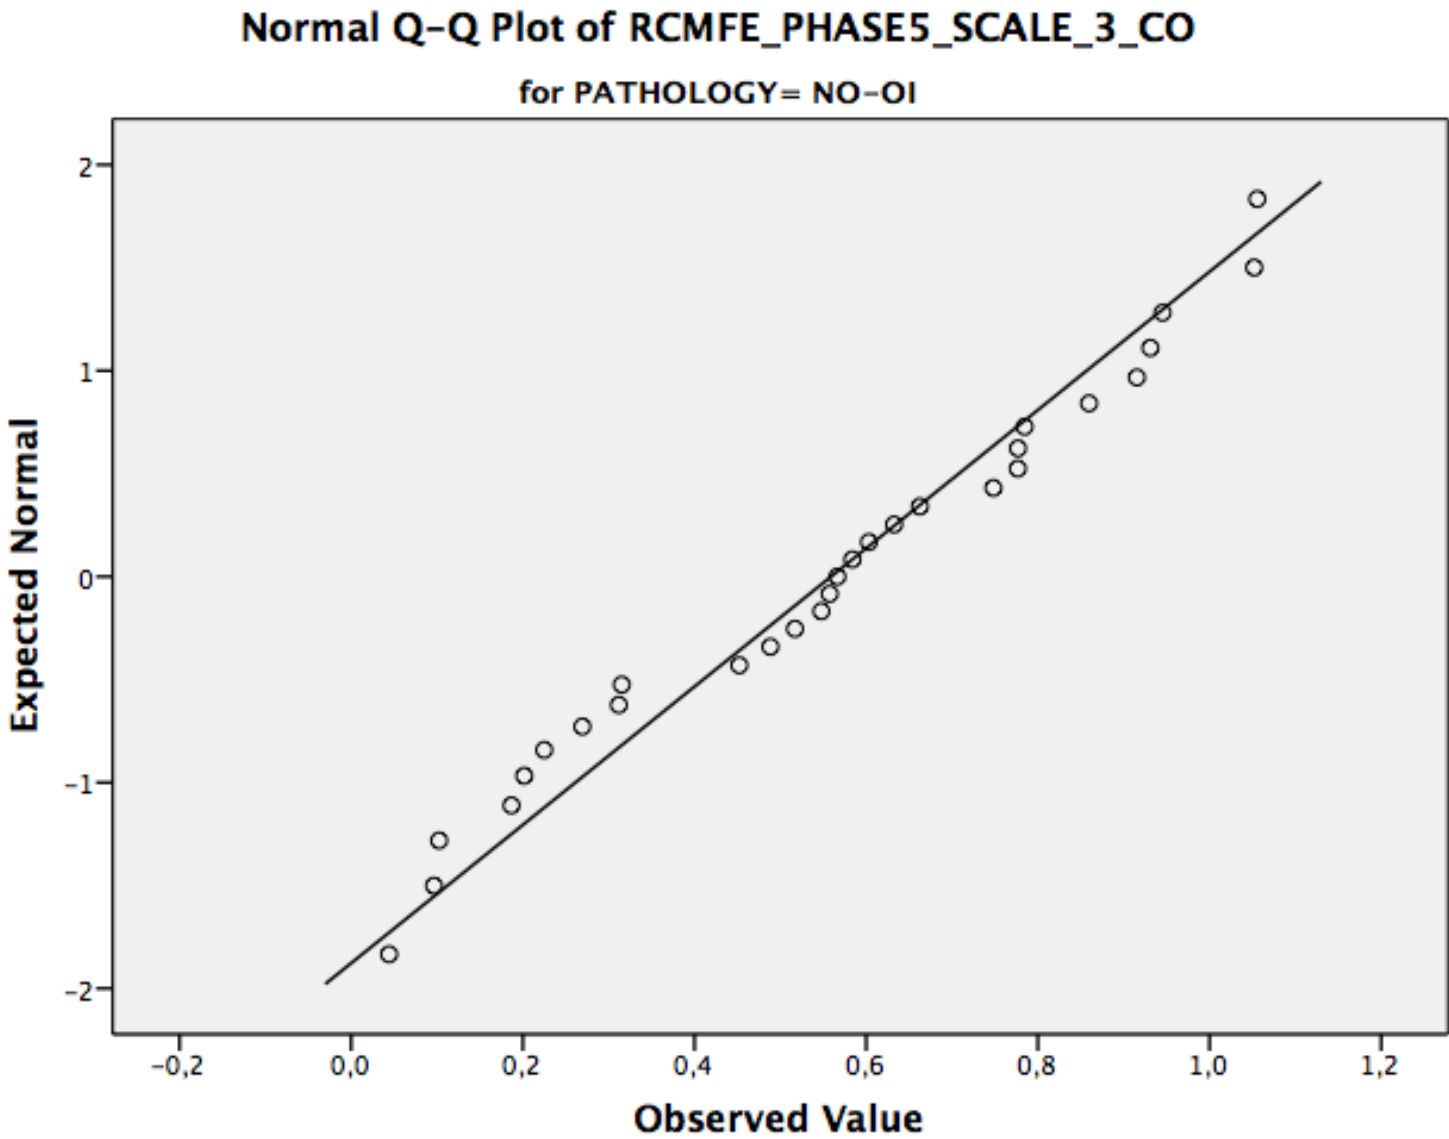

# Normal Q-Q Plot of RCMFE\_PHASE5\_SCALE\_3\_CO

for PATHOLOGY= OI

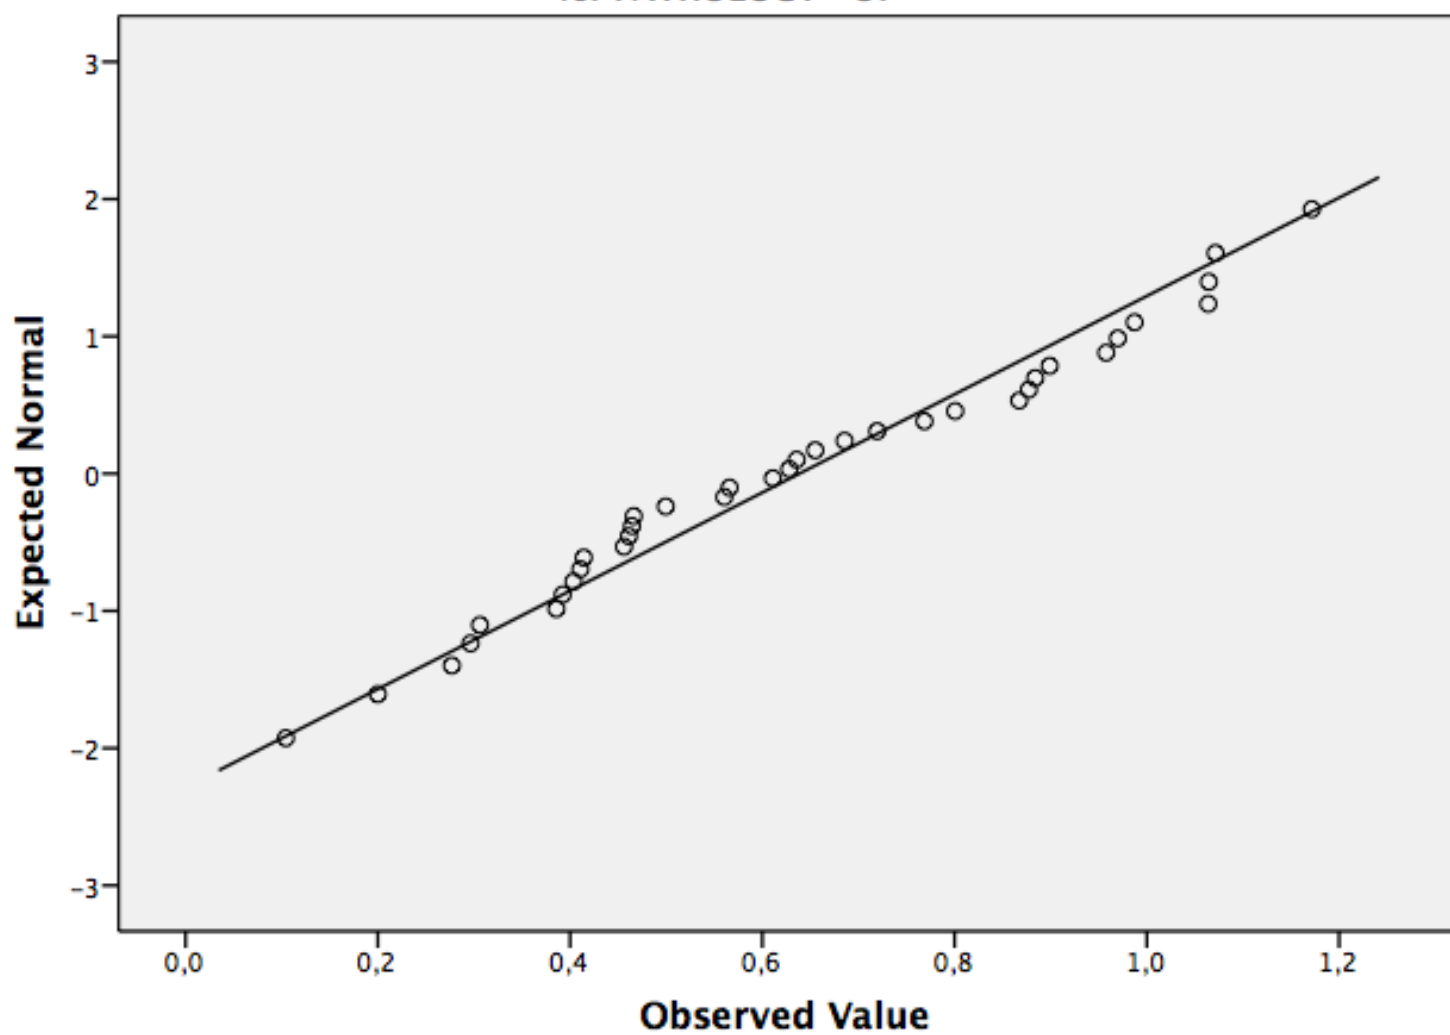

Normal Q-Q Plots

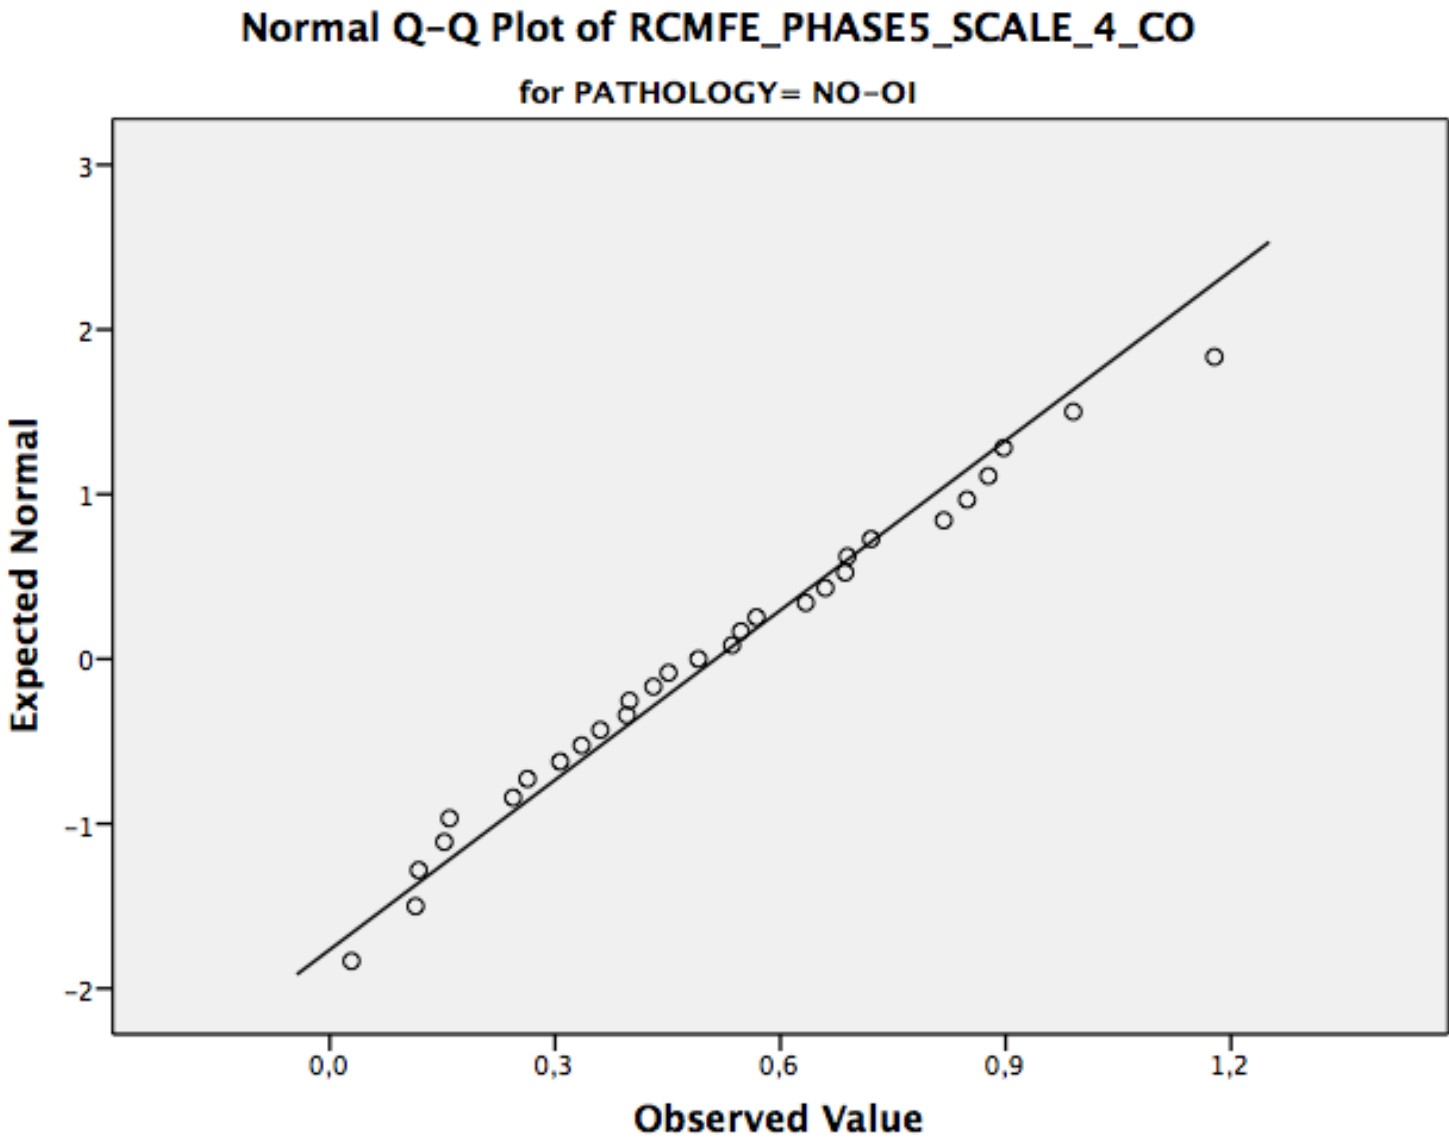

# Normal Q-Q Plot of RCMFE\_PHASE5\_SCALE\_4\_CO

for PATHOLOGY= OI

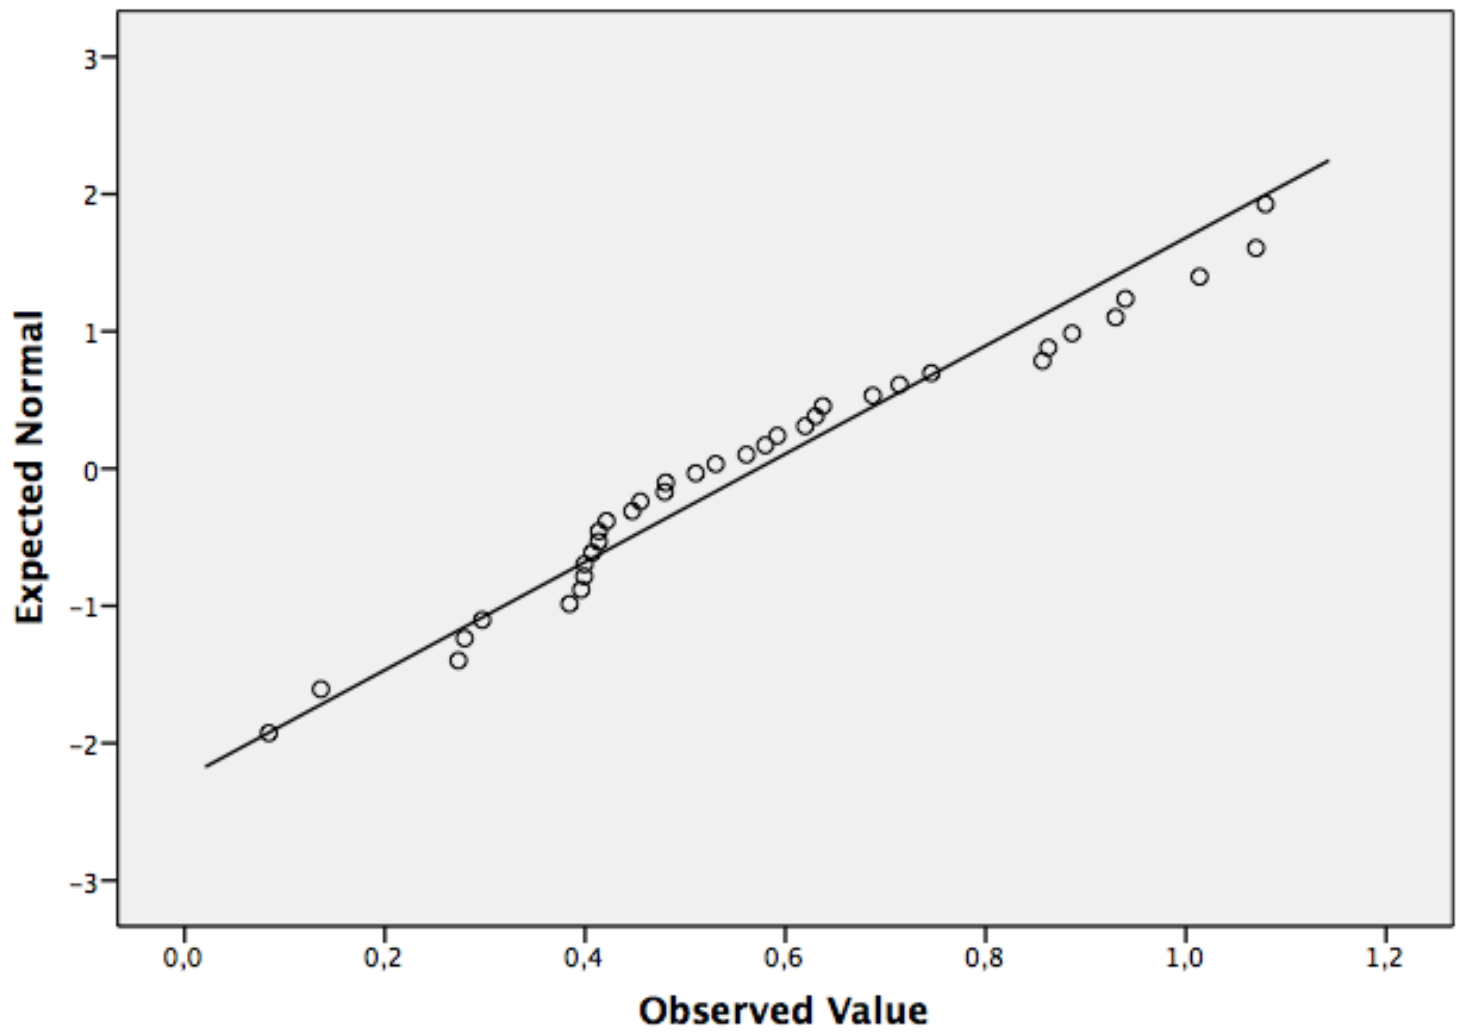

Normal Q-Q Plots

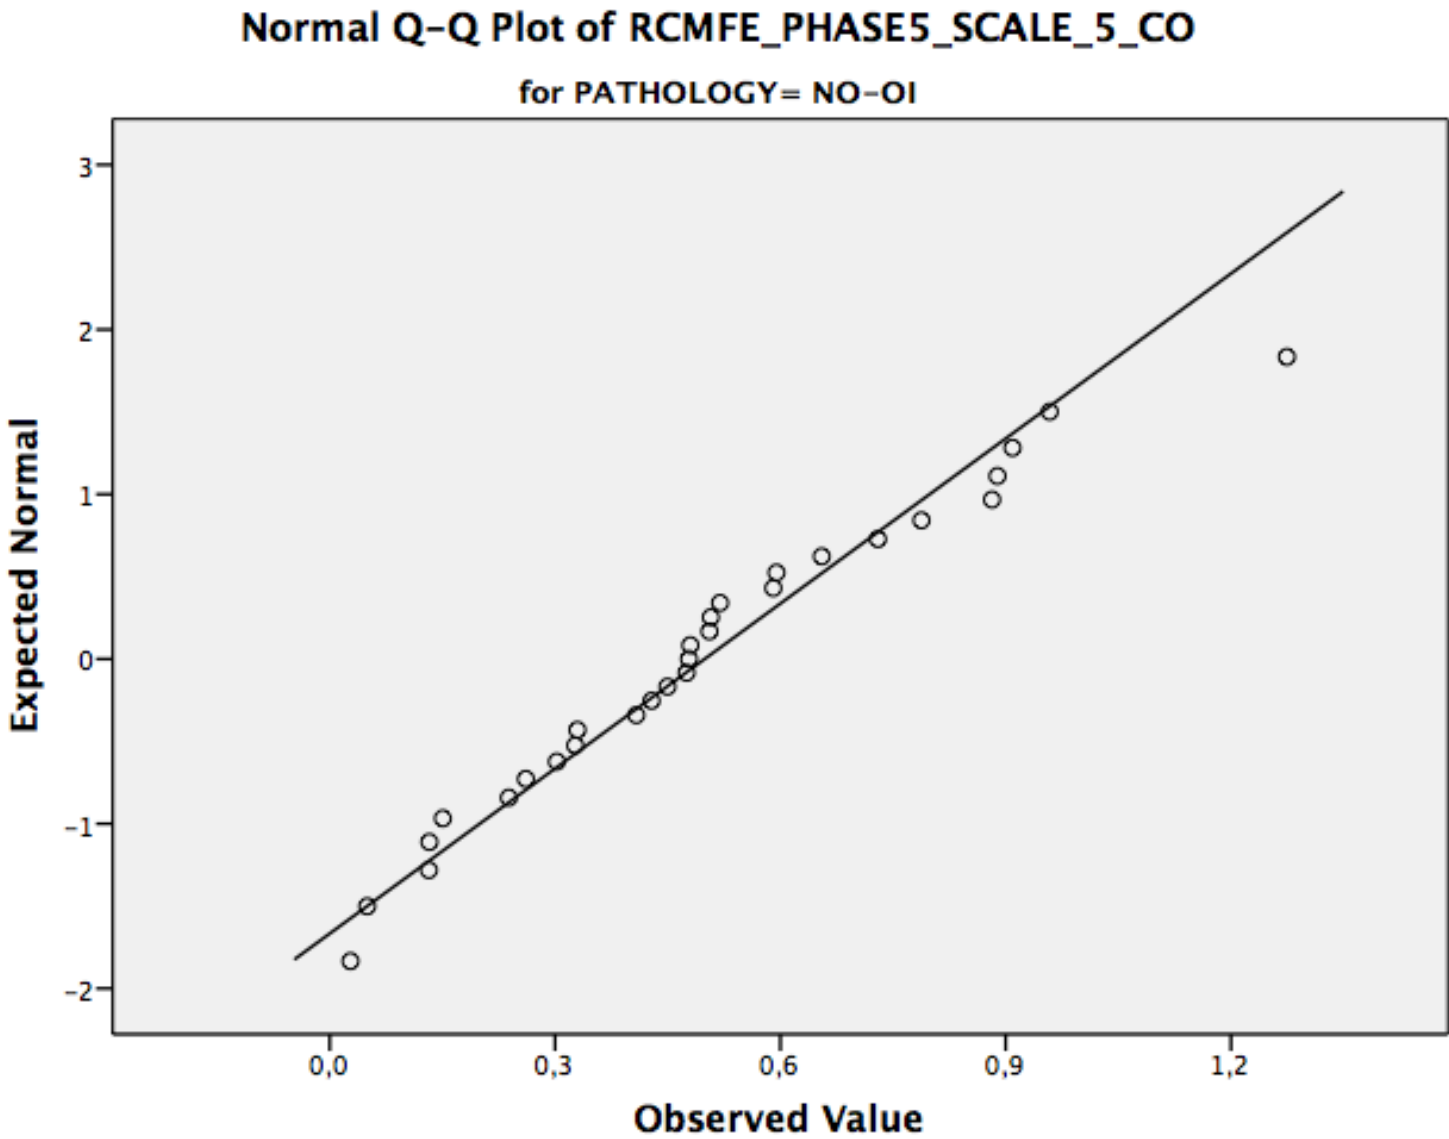

# Normal Q-Q Plot of RCMFE\_PHASE5\_SCALE\_5\_CO

for PATHOLOGY= OI

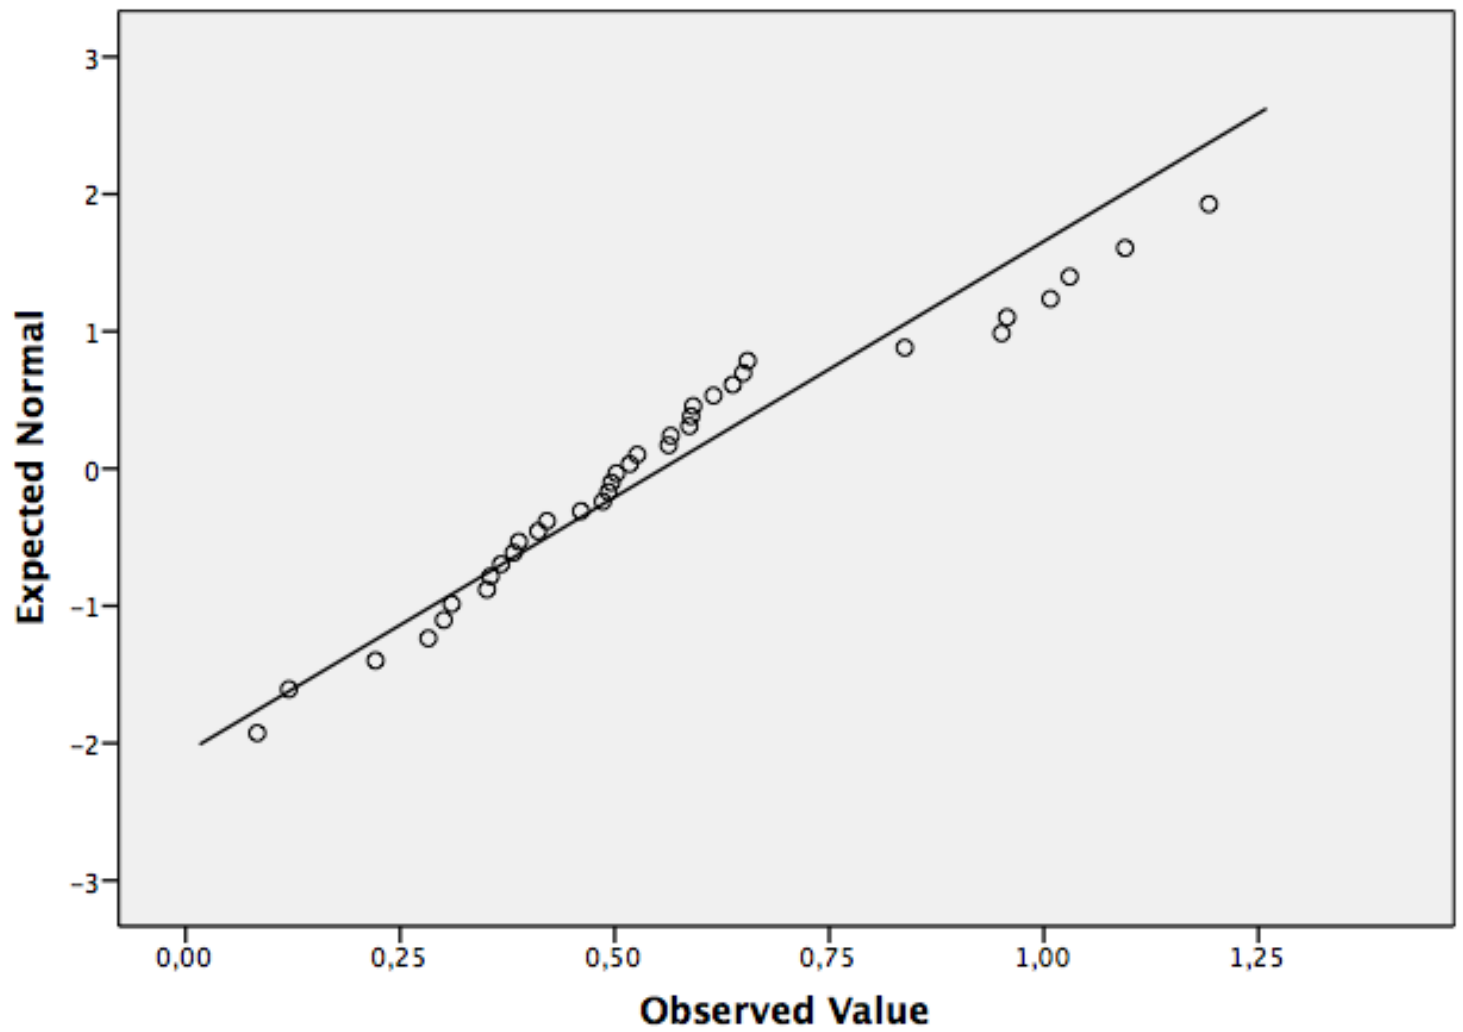

Supplement: s1 [file s1]
